# Supplementary material for: Defects in translation-dependent quality control pathways lead to convergent molecular and neurodevelopmental pathology
Source: eLife. 2021 Apr 26;10:e66904. doi: 10.7554/eLife.66904 (PMC8075583; doi:10.7554/eLife.66904)
Supplement: Figure 1—source data 1. [file elife-66904-fig1-data1.xlsx]

## Sheet: Panel F
		Cp Gene				delta Cp Gene			delta delta Gene			Rel. fold change
	Genotype	Gapdh	Hbs1l	Hbs1l (Iso. II)		Hbs1l	Hbs1l (Iso. II)		Hbs1l	Hbs1l (Iso. II)		Hbs1l	Hbs1l (Iso. II)
	1) E8.5 Hbs1l +/+	19.26	26.35	30.27		7.09	11.01		0.31	0.0433333		0.806642	0.97041
	2) E8.5 Hbs1l +/+	17.77	24.37	28.69		6.6	10.92		-0.18	-0.0466667		1.13288	1.03288
	3) E8.5 Hbs1l +/+	18	24.65	28.97		6.65	10.97		-0.13	0.00333333		1.09429	0.997692
	1) E8.5 Hbs1l -/-	18.29	34.88	29.36		16.59	11.07		9.81	0.103333		0.00111403	0.93088
	2) E8.5 Hbs1l -/-	18.19	34.26	29.58		16.07	11.39		9.29	0.423333		0.00159746	0.7457
	3) E8.5 Hbs1l -/-	18.27	36.23	29.37		17.96	11.1		11.18	0.133333		0.000431007	0.911722
	Genotype
			Hbs1l	Hbs1l (Iso. II)
	E8.5 Hbs1l +/+	mean	1.01127	1.00033
		SD	0.178263	0.0313159
	E8.5 Hbs1l -/-	mean	0.0010475	0.862767
		SD	0.000586068	0.101835
		Cp Gene				delta Cp Gene			delta delta Gene			Rel. fold change
	Genotype	Gapdh	Hbs1l	Hbs1l (Iso. II)		Hbs1l	Hbs1l (Iso. II)		Hbs1l	Hbs1l (Iso. II)		Hbs1l	Hbs1l (Iso. II)
	1) E8.5 Hbs1l +/+	15.41	22.22	26.95		6.81	11.54		-0.34	0.0433333		1.26576	0.97041
	2) E8.5 Hbs1l +/+	16.28	23.73	27.98		7.45	11.7		0.3	0.203333		0.812252	0.868541
	3) E8.5 Hbs1l +/+	16.76	23.95	28.01		7.19	11.25		0.04	-0.246667		0.972655	1.18646
	1) E8.5 Hbs1l tm1a/tm1a	16.14	26.77	27.45		10.63	11.31		3.48	-0.186667		0.0896222	1.13813
	2) E8.5 Hbs1l tm1a/tm1a	20.87	31.71	32.38		10.84	11.51		3.69	0.0133333		0.0774817	0.990801
	3) E8.5 Hbs1l tm1a/tm1a	16.83	27.34	28.59		10.51	11.76		3.36	0.263333		0.0973956	0.833161
	Genotype
			Hbs1l	Hbs1l (Iso. II)
	E8.5 Hbs1l +/+	mean	1.01689	1.00847
		SD	0.229965	0.162342
	E8.5 Hbs1l tm1a/tm1a	mean	0.0881665	0.987364
		SD	0.0100364	0.152514
		Cp Gene				delta Cp Gene			delta delta Gene			Rel. fold change
	Genotype	Gapdh	Hbs1l	Hbs1l (Iso. II)		Hbs1l	Hbs1l (Iso. II)		Hbs1l	Hbs1l (Iso. II)		Hbs1l	Hbs1l (Iso. II)
	1) E8.5 Hbs1l +/+	15.11	21.76	25.81		6.65	10.7		0.0766667	-0.106667		0.948246	1.07674
	2) E8.5 Hbs1l +/+	15.07	21.53	25.97		6.46	10.9		-0.113333	0.0933333		1.08172	0.937354
	3) E8.5 Hbs1l +/+	15.15	21.76	25.97		6.61	10.82		0.0366667	0.0133333		0.974905	0.990801
	1) E8.5 Hbs1l GTC/+	14.7	22.31	26.17		7.61	11.47		1.03667	0.663333		0.487452	0.631418
	2) E8.5 Hbs1l GTC/+	15.08	22.81	26.44		7.73	11.36		1.15667	0.553333		0.448548	0.681444
	3) E8.5 Hbs1l GTC/+	15.8	23.25	27.77		7.45	11.97		0.876667	1.16333		0.544624	0.44648
	Genotype
			Hbs1l	Hbs1l (Iso. II)
	E8.5 Hbs1l +/+	mean	1.00163	1.00163
		SD	0.0706372	0.0703199
	E8.5 Hbs1l GTC/+	mean	0.493541	0.586447
		SD	0.0483269	0.123769
