# Supplementary material for: Defects in translation-dependent quality control pathways lead to convergent molecular and neurodevelopmental pathology
Source: eLife. 2021 Apr 26;10:e66904. doi: 10.7554/eLife.66904 (PMC8075583; doi:10.7554/eLife.66904)
Supplement: Figure 2—figure supplement 1—source data 1. [file elife-66904-fig2-figsupp1-data1.xlsx]

## Sheet: Panel C
	BrdU (30 minutes)
	E12.5		Ki67+	BrdU+ ; Ki67+	S-Phase				Ki67+	BrdU+ ; Ki67+	S-Phase
	#1 Hbs1l fl/+	section #1	245	64	26.1224		#1 Hbs1l mut	section #1	487	124	25.462
		section #2	237	71	29.9578			section #2	389	118	30.3342
		section #3	345	73	21.1594			section #3	257	126	49.0272
				mean	25.7466					mean	34.9411
	#2 Hbs1l fl/+	section #1	491	142	28.9206		#2 Hbs1l mut	section #1	244	91	37.2951
		section #2	408	140	34.3137			section #2	271	129	47.6015
		section #3	593	187	31.5346			section #3	250	120	48
				mean	31.5896					mean	44.2989
	#3 Hbs1l fl/+	section #1	299	89	29.7659		#3 Hbs1l mut	section #1	231	90	38.961
		section #2	323	97	30.031			section #2	245	107	43.6735
		section #3	491	160	32.5866			section #3	213	72	33.8028
				mean	30.7945					mean	38.8124
	E13.5		Ki67+	BrdU+ ; Ki67+	S-Phase				Ki67+	BrdU+ ; Ki67+	S-Phase
	#1 Hbs1l fl/+	section #1	147	62	42.1769		#1 Hbs1l mut	section #1	290	132	45.5172
		section #2	180	74	41.1111			section #2	211	120	56.872
		section #3	178	71	39.8876			section #3	239	143	59.8326
				mean	41.0585					mean	54.074
	#2 Hbs1l fl/+	section #1	212	99	46.6981		#2 Hbs1l mut	section #1	125	74	59.2
		section #2	194	96	49.4845			section #2	137	69	50.365
		section #3	223	95	42.6009			section #3	141	99	70.2128
				mean	46.2612					mean	59.9259
	#3 Hbs1l fl/+	section #1	206	78	37.8641		#3 Hbs1l mut	section #1	134	85	63.4328
		section #2	167	80	47.9042			section #2	139	99	71.223
		section #3	185	65	35.1351			section #3	124	79	63.7097
				mean	40.3011					mean	66.1218

## Sheet: Panel D
	pH3
	E12.5		PCNA+	pH3+ ; PCNA+	M-Phase				PCNA+	pH3+ ; PCNA+	M-Phase
	#1 Hbs1l fl/+	section #1	406	54	13.3005		#1 Hbs1l mut	section #1	389	54	13.8817
		section #2	382	54	14.1361			section #2	299	58	19.398
		section #3	347	49	14.121			section #3	291	82	28.1787
				mean	13.8526					mean	20.4861
	#2 Hbs1l fl/+	section #1	279	41	14.6953		#2 Hbs1l mut	section #1	313	77	24.6006
		section #2	333	49	14.7147			section #2	294	58	19.7279
		section #3	269	45	16.7286			section #3	255	64	25.098
				mean	15.3796					mean	23.1422
	#3 Hbs1l fl/+	section #1	365	50	13.6986		#3 Hbs1l mut	section #1	268	69	25.7463
		section #2	322	58	18.0124			section #2	408	87	21.3235
		section #3	354	54	15.2542			section #3	246	70	28.4553
				mean	15.6551					mean	25.175
	E13.5		PCNA+	pH3+ ; PCNA+	M-Phase				PCNA+	pH3+ ; PCNA+	M-Phase
	#1 Hbs1l fl/+	section #1	256	13	5.07812		#1 Hbs1l mut	section #1	305	29	9.5082
		section #2	218	10	4.58716			section #2	280	25	8.92857
		section #3	282	11	3.90071			section #3	251	21	8.36653
				mean	4.522					mean	8.93443
	#2 Hbs1l fl/+	section #1	212	12	5.66038		#2 Hbs1l mut	section #1	212	24	11.3208
		section #2	268	21	7.83582			section #2	238	29	12.1849
		section #3	205	14	6.82927			section #3	185	28	15.1351
				mean	6.77516					mean	12.8803
	#3 Hbs1l fl/+	section #1	208	12	5.76923		#3 Hbs1l mut	section #1	149	24	16.1074
		section #2	248	16	6.45161			section #2	172	21	12.2093
		section #3	203	15	7.38916			section #3	169	32	18.9349
				mean	6.53667					mean	15.7505

## Sheet: Panel F
	Pax2 cells
	E14.5
	#1 Hbs1l fl/+	section #1	114		#1 Hbs1l mut	section #1	31
		section #2	105			section #2	25
		section #3	113			section #3	20
		mean	110.667			mean	25.3333
	#2 Hbs1l fl/+	section #1	111		#2 Hbs1l mut	section #1	28
		section #2	136			section #2	15
		section #3	121			section #3	22
		mean	122.667			mean	21.6667
	#3 Hbs1l fl/+	section #1	134		#3 Hbs1l mut	section #1	28
		section #2	115			section #2	30
		section #3	63			section #3	25
		mean	104			mean	27.6667
	E16.5
	#1 Hbs1l fl/+	section #1	182		#1 Hbs1l mut	section #1	78
		section #2	161			section #2	83
		section #3	118			section #3	76
		mean	153.667			mean	79
	#2 Hbs1l fl/+	section #1	180		#2 Hbs1l mut	section #1	76
		section #2	185			section #2	71
		section #3	172			section #3	78
		mean	179			mean	75
	#3 Hbs1l fl/+	section #1	165		#3 Hbs1l mut	section #1	97
		section #2	188			section #2	64
		section #3	193			section #3	93
		mean	182			mean	84.6667

## Sheet: Panel I
	Ki67 cells (EGL)
	E13.5
	#1 Hbs1l fl/+	section #1	55		#1 Hbs1l mut	section #1	20
		section #2	77			section #2	23
		section #3	63			section #3	24
		mean	65			mean	22.3333
	#2 Hbs1l fl/+	section #1	120		#2 Hbs1l mut	section #1	41
		section #2	123			section #2	47
		section #3	109			section #3	39
		mean	117.333			mean	42.3333
	#3 Hbs1l fl/+	section #1	98		#3 Hbs1l mut	section #1	19
		section #2	77			section #2	25
		section #3	101			section #3	26
		mean	92			mean	23.3333
	E14.5
	#1 Hbs1l fl/+	section #1	189		#1 Hbs1l mut	section #1	90
		section #2	186			section #2	81
		section #3	171			section #3	102
		mean	182			mean	91
	#2 Hbs1l fl/+	section #1	153		#2 Hbs1l mut	section #1	71
		section #2	161			section #2	76
		section #3	163			section #3	70
		mean	159			mean	72.3333
	#3 Hbs1l fl/+	section #1	146		#3 Hbs1l mut	section #1	58
		section #2	139			section #2	64
		section #3	135			section #3	59
		mean	140			mean	60.3333
	E16.5
	#1 Hbs1l fl/+	section #1	425		#1 Hbs1l mut	section #1	192
		section #2	414			section #2	196
		section #3	328			section #3	180
		mean	389			mean	189.333
	#2 Hbs1l fl/+	section #1	370		#2 Hbs1l mut	section #1	255
		section #2	388			section #2	210
		section #3	384			section #3	208
		mean	380.667			mean	224.333
	#3 Hbs1l fl/+	section #1	364		#3 Hbs1l mut	section #1	221
		section #2	490			section #2	186
		mean	427			mean	203.5

## Sheet: Panel K
	BrdU (24h)
	E13.5		BrdU+ (EGL)				BrdU+ (EGL)
	#1 Hbs1l fl/+	section #1	31		#1 Hbs1l mut	section #1	30
		section #2	33			section #2	10
		section #3	39			section #3	21
		mean	34.3333			mean	20.3333
	#2 Hbs1l fl/+	section #1	35		#2 Hbs1l mut	section #1	15
		section #2	20			section #2	19
		section #3	15			section #3	15
		mean	23.3333			mean	16.3333
	#3 Hbs1l fl/+	section #1	36		#3 Hbs1l mut	section #1	15
		section #2	26			section #2	14
		section #3	17			section #3	16
		mean	26.3333			mean	15
	E14.5
	#1 Hbs1l fl/+	section #1	73		#1 Hbs1l mut	section #1	35
		section #2	79			section #2	44
		section #3	67			section #3	35
		mean	73			mean	38
	#2 Hbs1l fl/+	section #1	59		#2 Hbs1l mut	section #1	35
		section #2	78			section #2	34
		section #3	68			section #3	30
		mean	68.3333			mean	33
	#3 Hbs1l fl/+	section #1	59		#3 Hbs1l mut	section #1	18
		section #2	43			section #2	19
		section #3	47			section #3	18
		mean	49.6667			mean	18.3333

## Sheet: Panel L
	BrdU (24h)
	E13.5		BrdU+ (EGL)	BrdU+ ; Ki67- (EGL)	cycle exit (EGL)				BrdU+ (EGL)	BrdU+ ; Ki67- (EGL)	cycle exit (EGL)
	#1 Hbs1l fl/+	section #1	31	4	12.9032		#1 Hbs1l mut	section #1	30	6	20
		section #2	33	5	15.1515			section #2	10	1	10
		section #3	39	6	15.3846			section #3	21	2	9.52381
				mean	14.4798					mean	13.1746
	#2 Hbs1l fl/+	section #1	35	6	17.1429		#2 Hbs1l mut	section #1	15	3	20
		section #2	20	3	15			section #2	19	4	21.0526
		section #3	15	3	20			section #3	15	2	13.3333
				mean	17.381					mean	18.1287
	#3 Hbs1l fl/+	section #1	36	6	16.6667		#3 Hbs1l mut	section #1	15	2	13.3333
		section #2	26	4	15.3846			section #2	14	1	7.14286
		section #3	17	4	23.5294			section #3	16	3	18.75
				mean	18.5269					mean	13.0754
	E14.5		BrdU+ (EGL)	BrdU+ ; Ki67- (EGL)	cycle exit (EGL)				BrdU+ (EGL)	BrdU+ ; Ki67- (EGL)	cycle exit (EGL)
	#1 Hbs1l fl/+	section #1	73	8	10.9589		#1 Hbs1l mut	section #1	35	2	5.71429
		section #2	79	9	11.3924			section #2	44	5	11.3636
		section #3	67	7	10.4478			section #3	35	3	8.57143
				mean	10.933					mean	8.54978
	#2 Hbs1l fl/+	section #1	59	3	5.08475		#2 Hbs1l mut	section #1	35	2	5.71429
		section #2	78	5	6.41026			section #2	34	3	8.82353
		section #3	68	3	4.41176			section #3	30	2	6.66667
				mean	5.30226					mean	7.06816
	#3 Hbs1l fl/+	section #1	59	5	8.47458		#3 Hbs1l mut	section #1	18	2	11.1111
		section #2	43	3	6.97674			section #2	19	2	10.5263
		section #3	47	4	8.51064			section #3	18	3	16.6667
				mean	7.98732					mean	12.768

## Sheet: Panel M
	BrdU (30 minutes)
	E16.5		Ki67+ (EGL)	BrdU+ ; Ki67+ (EGL)	S-Phase (EGL)				Ki67+ (EGL)	BrdU+ ; Ki67+ (EGL)	S-Phase (EGL)
	#1 Hbs1l fl/+	section #1	425	132	31.0588		#1 Hbs1l mut	section #1	192	53	27.6042
		section #2	414	98	23.6715			section #2	196	59	30.102
		section #3	328	99	30.1829			section #3	180	66	36.6667
				mean	28.3044					mean	31.4576
	#2 Hbs1l fl/+	section #1	370	97	26.2162		#2 Hbs1l mut	section #1	255	82	32.1569
		section #2	388	95	24.4845			section #2	210	69	32.8571
		section #3	284	92	32.3944			section #3	208	62	29.8077
				mean	27.6984					mean	31.6072
	#3 Hbs1l fl/+	section #1	364	121	33.2418		#3 Hbs1l mut	section #1	221	61	27.6018
		section #2	490	153	31.2245			section #2	186	57	30.6452
				mean	32.2331					mean	29.1235
	P5 (lobule IV/V)		Ki67+ (EGL)	BrdU+ ; Ki67+ (EGL)	S-Phase (EGL)				Ki67+ (EGL)	BrdU+ ; Ki67+ (EGL)	S-Phase (EGL)
	#1 Hbs1l fl/+	section #1	764	327	42.801		#1 Hbs1l mut	section #1	686	312	45.481
		section #2	733	303	41.337			section #2	616	314	50.974
		section #3	784	350	44.6429			section #3	675	305	45.1852
				mean	42.927					mean	47.2134
	#2 Hbs1l fl/+	section #1	795	373	46.9182		#2 Hbs1l mut	section #1	591	291	49.2386
		section #2	675	332	49.1852			section #2	606	327	53.9604
		section #3	688	300	43.6047			section #3	540	299	55.3704
				mean	46.5694					mean	52.8564
	#3 Hbs1l fl/+	section #1	537	363	67.5978		#3 Hbs1l mut	section #1	535	254	47.4766
		section #2	433	216	49.8845			section #2	477	236	49.4759
		section #3	447	202	45.1902			section #3	457	210	45.9519
				mean	54.2241					mean	47.6348

## Sheet: Panel N
	E16.5		PCNA+ (EGL)	pH3+ ; PCNA+ (EGL)	M-Phase (EGL)				PCNA+ (EGL)	pH3+ ; PCNA+ (EGL)	M-Phase (EGL)
	#1 Hbs1l fl/+	section #1	444	28	6.30631		#1 Hbs1l mut	section #1	185	5	2.7027
		section #2	364	22	6.04396			section #2	264	8	3.0303
		section #3	348	13	3.73563			section #3	120	5	4.16667
				mean	5.36196					mean	3.29989
	#2 Hbs1l fl/+	section #1	399	17	4.26065		#2 Hbs1l mut	section #1	216	11	5.09259
		section #2	366	19	5.19126			section #2	192	9	4.6875
		section #3	333	15	4.5045			section #3	183	10	5.46448
				mean	4.65214					mean	5.08152
	#3 Hbs1l fl/+	section #1	402	10	2.48756		#3 Hbs1l mut	section #1	225	12	5.33333
		section #2	396	24	6.06061			section #2	210	13	6.19048
				mean	4.27408					mean	5.7619
	P5 (lobule IV/V)		PCNA+ (EGL)	pH3+ ; PCNA+ (EGL)	M-Phase (EGL)				PCNA+ (EGL)	pH3+ ; PCNA+ (EGL)	M-Phase (EGL)
	#1 Hbs1l fl/+	section #1	713	32	4.48808		#1 Hbs1l mut	section #1	548	43	7.84672
		section #2	730	40	5.47945			section #2	698	45	6.44699
		section #3	752	40	5.31915			section #3	547	31	5.66728
				mean	5.09556					mean	6.65366
	#2 Hbs1l fl/+	section #1	547	25	4.57038		#2 Hbs1l mut	section #1	465	27	5.80645
		section #2	854	42	4.91803			section #2	574	28	4.87805
		section #3	585	40	6.83761			section #3	487	25	5.13347
				mean	5.44201					mean	5.27266
	#3 Hbs1l fl/+	section #1	474	27	5.6962		#3 Hbs1l mut	section #1	507	23	4.53649
		section #2	662	35	5.28701			section #2	558	29	5.19713
		section #3	584	34	5.82192			section #3	526	36	6.84411
				mean	5.60171					mean	5.52591

## Sheet: Panel O
	Olig2+ cells
	P5 cerebellum
	#1 Hbs1l fl/+	section #1	510		#1 Hbs1l mut	section #1	305
		section #2	498			section #2	297
		section #3	537			section #3	342
		mean	515			mean	314.667
	#2 Hbs1l fl/+	section #1	444		#2 Hbs1l mut	section #1	384
		section #2	452			section #2	255
		section #3	486			section #3	414
		mean	460.667			mean	351
	#3 Hbs1l fl/+	section #1	357		#3 Hbs1l mut	section #1	316
		section #2	385			section #2	292
		section #3	408			section #3	299
		mean	383.333			mean	302.333
