# Supplementary material for: Defects in translation-dependent quality control pathways lead to convergent molecular and neurodevelopmental pathology
Source: eLife. 2021 Apr 26;10:e66904. doi: 10.7554/eLife.66904 (PMC8075583; doi:10.7554/eLife.66904)
Supplement: Figure 2—figure supplement 2—source data 1. [file elife-66904-fig2-figsupp2-data1.xlsx]

## Sheet: Panel C
	Granule cells
	lobule IX
	35 weeks		Granule cells				Granule cells				Granule cells
	#1 Gabra6 Pelo fl/+	section #1	524		#1 Pelo mut	section #1	572		#1 Hbs1l mut	section #1	489
		section #2	493			section #2	467			section #2	467
		section #3	497			section #3	474			section #3	581
		mean	504.667			mean	504.333			mean	512.333
	#2 Gabra6 Pelo fl/+	section #1	474		#2 Pelo mut	section #1	508		#2 Hbs1l mut	section #1	513
		section #2	471			section #2	442			section #2	539
		section #3	506			section #3	463			section #3	489
		mean	483.667			mean	471			mean	513.667
	#3 Gabra6 Pelo fl/+	section #1	507		#3 Pelo mut	section #1	474		#3 Hbs1l mut	section #1	430
		section #2	498			section #2	490			section #2	495
		section #3	537			section #3	508			section #3	515
		mean	514			mean	490.667			mean	480

## Sheet: Panel E
	cerebellum P28
		GAPDH	Hbs1l	Pelo		Hbs1l/GAPDH	rel. Hbs1l level		Pelo/GAPDH	rel. Pelo level			Hbs1l mean	Hbs1l SD
	1) Hbs1l fl/fl	24836.1	15805.1	9510.15		0.636376	0.965441		0.382916	0.969218		Hbs1l fl/fl	1	0.258008
	1) Hbs1l mut	11285.5	2482.45	670.335		0.219967	0.333711		0.0593977	0.150345		Hbs1l mut	0.464078	0.119513
	2) Hbs1l fl/fl	8080.87	6783.61	2671.28		0.839465	1.27355		0.330568	0.836716
	2) Hbs1l mut	16259.2	6092.42	2076.5		0.374705	0.568462		0.127712	0.323258			Pelo mean	Pelo SD
	3) Hbs1l fl/fl	36872.5	18496.2	17394.5		0.501626	0.761013		0.471748	1.19407		Hbs1l fl/fl	1	0.180652
	3) Hbs1l mut	32655.3	10548.5	5304.23		0.323026	0.49006		0.162431	0.411136		Hbs1l mut	0.294913	0.132686
		GAPDH	Hbs1l	Pelo		Hbs1l/GAPDH	rel. Hbs1l level		Pelo/GAPDH	rel. Pelo level			Hbs1l mean	Hbs1l SD
	1) Pelo fl/fl	19991.9	12614.9	13432.3		0.630997	1.27969		0.671888	1.15597		Pelo fl/fl	1	0.252613
	1) Pelo mut	16139.8	2575.71	3146.22		0.159588	0.323652		0.194936	0.335383		Pelo mut	0.259325	0.0618149
	2) Pelo fl/fl	26690.6	12264	14665.3		0.459489	0.931866		0.549456	0.945325
	2) Pelo mut	19374.5	2426.03	3410.07		0.125218	0.253948		0.176009	0.302819			Pelo mean	Pelo SD
	3) Pelo fl/fl	29525.4	11478.6	15422.9		0.388769	0.788442		0.522361	0.89871		Pelo fl/fl	1	0.137067
	3) Pelo mut	25324.4	2502.08	5020.61		0.0988012	0.200374		0.198252	0.341087		Pelo mut	0.32643	0.0206456
