# Supplementary material for: Defects in translation-dependent quality control pathways lead to convergent molecular and neurodevelopmental pathology
Source: eLife. 2021 Apr 26;10:e66904. doi: 10.7554/eLife.66904 (PMC8075583; doi:10.7554/eLife.66904)
Supplement: Figure 2—source data 1. [file elife-66904-fig2-data1.xlsx]

## Sheet: Panel C
	B6J cerebellum
			Hbs1l	Vinculin		Hbs1l/Vinc.	Fold change			Hbs1l mean	Hbs1l SD
		1) E16.5	34125	29433.2		1.15941	0.801708		E16.5	1	0.184832
		1) P14	11205.5	19759.4		0.567099	0.392139		P14	0.513013	0.129195
		2) E16.5	29990.7	20118.7		1.49069	1.03079
		2) P14	10815.8	15026		0.719804	0.497731
		3) E16.5	34240.4	20279.6		1.68841	1.16751
		3) P14	15912.3	16949.5		0.93881	0.64917
			Pelo	Vinculin		Pelo/Vinc.	Fold change			Pelo mean	Pelo SD
		1) E16.5	26924.2	29433.2		0.914755	1.07468		E16.5	1	0.0726471
		1) P14	8671.03	19759.4		0.438832	0.51555		P14	0.447723	0.0607365
		2) E16.5	17052.1	20118.7		0.847575	0.995753
		2) P14	5095.08	15026		0.339085	0.398366
		3) E16.5	16046.1	20279.6		0.791241	0.92957
		3) P14	6192.93	16949.5		0.365376	0.429253

## Sheet: Panel F
	Ki67 cells (VZ)
	E12.5
	#1 Hbs1l +/+	section #1	389		#1 Hbs1l mut	section #1	406
		section #2	299			section #2	382
		section #3	291			section #3	347
		mean	326.333			mean	378.333
	#2 Hbs1l +/+	section #1	268		#2 Hbs1l mut	section #1	279
		section #2	408			section #2	333
		section #3	246			section #3	269
		mean	307.333			mean	293.667
	#3 Hbs1l +/+	section #1	313		#3 Hbs1l mut	section #1	365
		section #2	294			section #2	322
		section #3	255			section #3	354
		mean	287.333			mean	347
	E13.5
	#1 Hbs1l fl/+	section #1	147		#1 Hbs1l mut	section #1	290
		section #2	180			section #2	211
		section #3	178			section #3	239
		mean	168.333			mean	246.667
	#2 Hbs1l fl/+	section #1	113		#2 Hbs1l mut	section #1	216
		section #2	115			section #2	181
		section #3	140			section #3	229
		mean	122.667			mean	208.667
	#3 Hbs1l fl/+	section #1	149		#3 Hbs1l mut	section #1	228
		section #2	145			section #2	238
		section #3	142			section #3	220
		mean	145.333			mean	228.667
	E14.5
	#1 Hbs1l fl/+	section #1	63		#1 Hbs1l mut	section #1	92
		section #2	77			section #2	95
		section #3	66			section #3	115
		mean	68.6667			mean	100.667
	#2 Hbs1l fl/+	section #1	66		#2 Hbs1l mut	section #1	114
		section #2	65			section #2	89
		section #3	58			section #3	89
		mean	63			mean	97.3333
	#3 Hbs1l fl/+	section #1	65		#3 Hbs1l mut	section #1	127
		section #2	86			section #2	116
		section #3	67			section #3	125
		mean	72.6667			mean	122.667
	E16.5
	#1 Hbs1l fl/+	section #1	60		#1 Hbs1l mut	section #1	68
		section #2	42			section #2	70
		section #3	30			section #3	57
		mean	44			mean	65
	#2 Hbs1l fl/+	section #1	26		#2 Hbs1l mut	section #1	52
		section #2	30			section #2	53
		section #3	31			section #3	47
		mean	29			mean	50.6667
	#3 Hbs1l fl/+	section #1	27		#3 Hbs1l mut	section #1	64
		section #2	29			section #2	60
		mean	28			mean	62

## Sheet: Panel H
	BrdU (24h)
	E13.5		total BrdU+	BrdU+ ; Ki67-	cycle exit				total BrdU+	BrdU+ ; Ki67-	cycle exit
	#1 Hbs1l fl/+	section #1	185	94	50.8108		#1 Hbs1l mut	section #1	236	59	25
		section #2	189	103	54.4974			section #2	243	94	38.6831
		section #3	197	106	53.8071			section #3	342	151	44.152
				mean	53.0384					mean	35.9451
	#2 Hbs1l fl/+	section #1	410	218	53.1707		#2 Hbs1l mut	section #1	275	112	40.7273
		section #2	310	177	57.0968			section #2	277	115	41.5162
		section #3	336	190	56.5476			section #3	244	102	41.8033
				mean	55.605					mean	41.3489
	#3 Hbs1l fl/+	section #1	514	320	62.2568		#3 Hbs1l mut	section #1	258	76	29.4574
		section #2	464	258	55.6034			section #2	302	122	40.3974
		section #3	478	257	53.7657			section #3	236	81	34.322
				mean	57.2086					mean	34.7256
	E14.5		total BrdU+	BrdU+ ; Ki67-	cycle exit				total BrdU+	BrdU+ ; Ki67-	cycle exit
	#1 Hbs1l fl/+	section #1	106	51	48.1132		#1 Hbs1l mut	section #1	107	34	31.7757
		section #2	91	51	56.044			section #2	82	28	34.1463
		section #3	101	49	48.5149			section #3	84	31	36.9048
				mean	50.8907					mean	34.2756
	#2 Hbs1l fl/+	section #1	81	40	49.3827		#2 Hbs1l mut	section #1	64	15	23.4375
		section #2	111	31	27.9279			section #2	104	21	20.1923
		section #3	84	44	52.381			section #3	80	19	23.75
				mean	43.2305					mean	22.4599
	#3 Hbs1l fl/+	section #1	147	68	46.2585		#3 Hbs1l mut	section #1	159	60	37.7358
		section #2	142	67	47.1831			section #2	172	51	29.6512
		section #3	162	69	42.5926			section #3	139	37	26.6187
				mean	45.3447					mean	31.3352

## Sheet: Panel J
	Lhx1/5 cells
	E12.5
	#1 Hbs1l fl/+	section #1	485		#1 Hbs1l mut	section #1	62
		section #2	523			section #2	121
		section #3	504			section #3	89
		mean	504			mean	90.6667
	#2 Hbs1l fl/+	section #1	531		#2 Hbs1l mut	section #1	150
		section #2	635			section #2	208
		section #3	603			section #3	181
		mean	589.667			mean	179.667
	#3 Hbs1l fl/+	section #1	408		#3 Hbs1l mut	section #1	56
		section #2	591			section #2	156
		section #3	540			section #3	117
		mean	513			mean	109.667
	E13.5
	#1 Hbs1l fl/+	section #1	834		#1 Hbs1l mut	section #1	438
		section #2	875			section #2	227
		section #3	781			section #3	234
		mean	830			mean	299.667
	#2 Hbs1l fl/+	section #1	702		#2 Hbs1l mut	section #1	380
		section #2	692			section #2	340
		section #3	762			section #3	258
		mean	718.667			mean	326
	#3 Hbs1l fl/+	section #1	754		#3 Hbs1l mut	section #1	320
		section #2	789			section #2	312
		section #3	723			section #3	319
		mean	755.333			mean	317
