# Supplementary material for: Defects in translation-dependent quality control pathways lead to convergent molecular and neurodevelopmental pathology
Source: eLife. 2021 Apr 26;10:e66904. doi: 10.7554/eLife.66904 (PMC8075583; doi:10.7554/eLife.66904)
Supplement: Figure 4—figure supplement 1—source data 1. [file elife-66904-fig4-figsupp1-data1.xlsx]

## Sheet: Panel A
	MEFs (4OHT)
		Cp Gene				delta Cp Gene			delta delta Gene			Rel. fold change
	Genotype	Gapdh	Hbs1l	Pelo		Hbs1l	Pelo		Hbs1l	Pelo		Hbs1l	Pelo
	1) Hbs1l fl/+	15.27	23.03	24		7.76	8.73		-0.0433333	0.306667		1.03049	0.808508
	2) Hbs1l fl/+	15.9	24	24.11		8.1	8.21		0.296667	-0.213333		0.814131	1.15936
	3) Hbs1l fl/+	15.54	23.09	23.87		7.55	8.33		-0.253333	-0.0933333		1.19196	1.06683
	1) CAG-Hbs1l -/-	15.19	31.98	23.43		16.79	8.24		8.98667	-0.183333		0.00197126	1.1355
	2) CAG-Hbs1l -/-	15.13	31.58	23.6		16.45	8.47		8.64667	0.0466667		0.00249513	0.968171
	3) CAG-Hbs1l -/-	15.3	30.73	23.68		15.43	8.38		7.62667	-0.0433333		0.00505993	1.03049
	Genotype
			Hbs1l	Pelo
	Hbs1l fl/+	mean	1.01219	1.01157
		SD	0.189577	0.18184
	CAG-Hbs1l -/-	mean	0.00317544	1.04472
		SD	0.0016529	0.0845696
		Cp Gene				delta Cp Gene			delta delta Gene			Rel. fold change
	Genotype	Gapdh	Hbs1l	Pelo		Hbs1l	Pelo		Hbs1l	Pelo		Hbs1l	Pelo
	1) Pelo fl/+	14.83	23.04	24		8.21	9.17		0.23	0.166667		0.852635	0.890899
	2) Pelo fl/+	13.97	21.59	22.83		7.62	8.86		-0.36	-0.143333		1.28343	1.10445
	3) Pelo fl/+	14.84	22.95	23.82		8.11	8.98		0.13	-0.0233333		0.913831	1.0163
	1) CAG-Pelo -/-	14.76	22.78	28.87		8.02	14.11		0.04	5.10667		0.972655	0.0290229
	2) CAG-Pelo -/-	15.49	23.35	29.09		7.86	13.6		-0.12	4.59667		1.08673	0.04133
	3) CAG-Pelo -/-	15.25	23.08	28.9		7.83	13.65		-0.15	4.64667		1.10957	0.0399222
	Genotype
			Hbs1l	Pelo
	Pelo fl/+	mean	1.01663	1.00389
		SD	0.233069	0.107318
	CAG-Pelo -/-	mean	1.05632	0.0367583
		SD	0.0733499	0.00673601

## Sheet: Panel C
	MEFs (4OHT)
		Vinculin	Hbs1l	Pelo		Hbs1l/Vinculin	rel. Hbs1l level		Pelo/Vinculin	rel. Pelo level			Hbs1l mean	Hbs1l SD
	1) Hbs1l fl/+ (2 day)	27267	32151.4	33576.8		1.17913	0.983786		1.23141	0.911073		Hbs1l fl/+ (2 day)	1	0.173386
	1) CAG-Hbs1l -/- (2 day)	29794.8	0	17993.1		0	0		0.603903	0.446805		CAG-Hbs1l -/- (2 day)	0	0
	1) Hbs1l fl/+ (4 day)	28529.5	35864.8	35238.1		1.25711	1.04885		1.23514	0.913838		Hbs1l fl/+ (4 day)	1.00607	0.05802
	1) CAG-Hbs1l -/- (4 day)	28910.1	0	8014.17		0	0		0.27721	0.205097		CAG-Hbs1l -/- (4 day)	0	0
	2) Hbs1l fl/+ (2 day)	16656.4	23575.7	23392.5		1.41542	1.18092		1.40442	1.03907
	2) CAG-Hbs1l -/- (2 day)	27632.8	0	16898.5		0	0		0.611537	0.452454
	2) Hbs1l fl/+ (4 day)	27918.6	34444.2	44488.7		1.23373	1.02934		1.59351	1.17898			Pelo mean	Pelo SD
	2) CAG-Hbs1l -/- (4 day)	31231.1	0	24510.9		0	0		0.784824	0.580662		Hbs1l fl/+ (2 day)	1	0.0772016
	3) Hbs1l fl/+ (2 day)	32455.6	32492.9	46053.9		1.00115	0.83529		1.41898	1.04985		CAG-Hbs1l -/- (2 day)	0.473215	0.0409479
	3) CAG-Hbs1l -/- (2 day)	28967.8	0	20374.6		0	0		0.703353	0.520385		Hbs1l fl/+ (4 day)	1.01833	0.141211
	3) Hbs1l fl/+ (4 day)	32528.9	36650	42303.1		1.12669	0.940031		1.30048	0.962175		CAG-Hbs1l -/- (4 day)	0.45652	0.217744
	3) CAG-Hbs1l -/- (4 day)	31096.5	0	24537.2		0	0		0.789067	0.583801
		0 = not detected
		Vinculin	Hbs1l	Pelo		Hbs1l/Vinculin	rel. Hbs1l level		Pelo/Vinculin	rel. Pelo level			Hbs1l mean	Hbs1l SD
	1) Pelo fl/fl (2 day)	8180.1	17883.3	29508.2		2.1862	0.831846		3.60731	0.814789		Pelo fl/fl (2 day)	1	0.219593
	1) CAG-Pelo -/- (2 day)	8938.43	2860.52	0		0.320025	0.121769		0	0		CAG-Pelo -/- (2 day)	0.20108	0.135281
	1) Pelo fl/fl (4 day)	8558.86	22434.4	43348.7		2.62119	0.997359		5.06478	1.14399		Pelo fl/fl (4 day)	1.06634	0.0769508
	1) CAG-Pelo -/- (4 day)	8673.03	571.263	0		0.0658666	0.0250622		0	0		CAG-Pelo -/- (4 day)	0.0403251	0.0204596
	2) Pelo fl/fl (2 day)	4996.91	16395.1	30500.5		3.28105	1.24844		6.10388	1.37869
	2) CAG-Pelo -/- (2 day)	8289.84	2705.64	0		0.32638	0.124187		0	0
	2) Pelo fl/fl (4 day)	8375.59	23163.7	45074.3		2.76562	1.05231		5.38163	1.21556			Pelo mean	Pelo SD
	2) CAG-Pelo -/- (4 day)	9369.32	796.335	0		0.0849939	0.0323401		0	0		Pelo fl/fl (2 day)	1	0.327983
	3) Pelo fl/fl (2 day)	9736.68	23534.9	34766.7		2.41714	0.919718		3.5707	0.806519		CAG-Pelo -/- (2 day)	0	0
	3) CAG-Pelo -/- (2 day)	8690.33	8160.1	0		0.938986	0.357283		0	0		Pelo fl/fl (4 day)	1.06941	0.194482
	3) Pelo fl/fl (4 day)	9758.67	29477	36666.4		3.02059	1.14933		3.75732	0.848672		CAG-Pelo -/- (4 day)	0	0
	3) CAG-Pelo -/- (4 day)	9328.96	1558.67	0		0.167079	0.0635732		0	0
		0 = not detected
