# Supplementary material for: Defects in translation-dependent quality control pathways lead to convergent molecular and neurodevelopmental pathology
Source: eLife. 2021 Apr 26;10:e66904. doi: 10.7554/eLife.66904 (PMC8075583; doi:10.7554/eLife.66904)
Supplement: Figure 5—source data 1. [file elife-66904-fig5-data1.xlsx]

## Sheet: Panel E
	MEFs
	4OHT
			P-p70S6K T389	p70S6K	P-p70S6K/p70S6K	rel. P level			P-p70S6K mean	P-p70S6K SD
		1) Pelo fl/fl	16279.9	27029.1	0.602312	1.04861		Pelo fl/fl	1	0.0987398
		1) Pelo mut	22751	25167.3	0.903991	1.57382		Pelo mut	1.61352	0.155119
		2) Pelo fl/fl	16599.6	32603.9	0.509129	0.886379
		2) Pelo mut	25334.9	29759.8	0.851313	1.48211
		3) Pelo fl/fl	12193.1	19932.1	0.611735	1.06501
		3) Pelo mut	19217.8	18747.6	1.02508	1.78463
			P-Eif2a	Eif2a	P-Eif2a/Eif2a	rel. P level			P-Eif2a mean	P-Eif2a SD
		1) Pelo fl/fl	5112.1	20622.6	0.247888	0.865017		Pelo fl/fl	1	0.292079
		1) Pelo mut	6374.53	18174.2	0.350745	1.22394		Pelo mut	1.11984	0.337668
		2) Pelo fl/fl	9151.07	23917.1	0.382616	1.33516
		2) Pelo mut	8013.77	20072	0.399251	1.39321
		3) Pelo fl/fl	4613.8	20129.5	0.229206	0.799826
		3) Pelo mut	1949.48	9163.45	0.212745	0.742383
