# Supplementary material for: Defects in translation-dependent quality control pathways lead to convergent molecular and neurodevelopmental pathology
Source: eLife. 2021 Apr 26;10:e66904. doi: 10.7554/eLife.66904 (PMC8075583; doi:10.7554/eLife.66904)
Supplement: Figure 6—source data 1. [file elife-66904-fig6-data1.xlsx]

## Sheet: Panel E
	MEFs
	4OHT
			P-p70S6K T389	p70S6K	P-p70S6K/p70S6K	rel. P level			P-p70S6K mean	P-p70S6K SD
		1) Upf2 fl/+	10434.5	12086.5	0.863321	1.03783		Upf2 fl/+	1	0.145151
		1) Upf2 mut	15910.5	9559.75	1.66432	2.00075		Upf2 mut	1.85409	0.282165
		2) Upf2 fl/+	19079.5	27315.4	0.698488	0.83968
		2) Upf2 mut	25432.6	19998.5	1.27173	1.52879
		3) Upf2 fl/+	22291.7	23873.5	0.933743	1.12249
		3) Upf2 mut	31100.8	18392.9	1.69091	2.03271
			P-Eif2a	Eif2a	P-Eif2a/Eif2a	rel. P level			P-Eif2a mean	P-Eif2a SD
		1) Upf2 fl/+	6225.26	9778.49	0.636628	0.847281		Upf2 fl/+	1	0.196063
		1) Upf2 mut	6259.43	7647.61	0.818482	1.08931		Upf2 mut	0.934363	0.153481
		2) Upf2 fl/+	19803.5	21584.1	0.917503	1.22109
		2) Upf2 mut	7841.65	13339.1	0.58787	0.78239
		3) Upf2 fl/+	16559.7	23656.6	0.700002	0.931624
		3) Upf2 mut	16392	23422.9	0.699827	0.931392
