# Supplementary material for: Defects in translation-dependent quality control pathways lead to convergent molecular and neurodevelopmental pathology
Source: eLife. 2021 Apr 26;10:e66904. doi: 10.7554/eLife.66904 (PMC8075583; doi:10.7554/eLife.66904)
Supplement: Figure 7—figure supplement 1—source data 1. [file elife-66904-fig7-figsupp1-data1.xlsx]

## Sheet: Panel B
	BrdU (24h)
	E13.5		BrdU+ (EGL)	BrdU+ ; Ki67- (EGL)	cycle exit (EGL)				BrdU+ (EGL)	BrdU+ ; Ki67- (EGL)	cycle exit (EGL)				BrdU+ (EGL)	BrdU+ ; Ki67- (EGL)	cycle exit (EGL)
	#1 Upf2 fl/fl	section #1	216	149	68.9815		#1 Upf2 mut	section #1	235	94	40		#1 Pelo mut	section #1	213	60	28.169
		section #2	208	133	63.9423			section #2	246	119	48.374			section #2	187	67	35.8289
		section #3	251	165	65.7371			section #3	254	102	40.1575			section #3	169	62	36.6864
				mean	66.2203					mean	42.8438					mean	33.5614
	#2 Upf2 fl/fl	section #1	178	103	57.8652		#2 Upf2 mut	section #1	175	77	44		#2 Pelo mut	section #1	127	40	31.4961
		section #2	177	98	55.3672			section #2	212	76	35.8491			section #2	110	37	33.6364
		section #3	218	124	56.8807			section #3	196	86	43.8776			section #3	154	49	31.8182
				mean	56.7044					mean	41.2422					mean	32.3169
	#3 Upf2 fl/fl	section #1	185	103	55.6757		#3 Upf2 mut	section #1	160	61	38.125		#3 Pelo mut	section #1	226	69	30.531
		section #2	191	114	59.6859			section #2	143	51	35.6643			section #2	202	105	51.9802
		section #3	153	83	54.2484			section #3	138	57	41.3043			section #3	187	78	41.7112
				mean	56.5366					mean	38.3646					mean	41.4075

## Sheet: Panel C
	Lhx1/5 cells
	E13.5
	#1 Upf2 fl/fl	section #1	938		#1 Upf2 mut	section #1	177		#1 Pelo mut	section #1	108
		section #2	858			section #2	101			section #2	110
		section #3	776			section #3	71			section #3	178
		mean	857.333			mean	116.333			mean	132
	#2 Upf2 fl/fl	section #1	684		#2 Upf2 mut	section #1	136		#2 Pelo mut	section #1	137
		section #2	885			section #2	138			section #2	142
		section #3	635			section #3	134			section #3	161
		mean	734.667			mean	136			mean	146.667
	#3 Upf2 fl/fl	section #1	773		#3 Upf2 mut	section #1	136		#3 Pelo mut	section #1	97
		section #2	777			section #2	159			section #2	184
		section #3	676			section #3	129			section #3	126
		mean	742			mean	141.333			mean	135.667

## Sheet: Panel F
	Pax2 cells
	E13.5
	#1 Upf2 fl/fl	section #1	83		#1 Upf2 mut	section #1	6		#1 Pelo mut	section #1	4
		section #2	64			section #2	3			section #2	13
		section #3	76			section #3	19			section #3	10
		mean	74.3333			mean	9.33333			mean	9
	#2 Upf2 fl/fl	section #1	83		#2 Upf2 mut	section #1	11		#2 Pelo mut	section #1	9
		section #2	77			section #2	1			section #2	5
		section #3	59			section #3	3			section #3	11
		mean	73			mean	5			mean	8.33333
	#3 Upf2 fl/fl	section #1	75		#3 Upf2 mut	section #1	1		#3 Pelo mut	section #1	5
		section #2	115			section #2	3			section #2	7
		section #3	91			section #3	10			section #3	10
		mean	93.6667			mean	4.66667			mean	7.33333

## Sheet: Panel H
	Tbr1 cells
	E13.5
	#1 Upf2 fl/fl	section #1	114		#1 Upf2 mut	section #1	2		#1 Pelo mut	section #1	2
		section #2	141			section #2	0			section #2	1
		section #3	132			section #3	2			section #3	2
		mean	129			mean	1.33333			mean	1.66667
	#2 Upf2 fl/fl	section #1	153		#2 Upf2 mut	section #1	6		#2 Pelo mut	section #1	1
		section #2	144			section #2	3			section #2	0
		section #3	146			section #3	0			section #3	2
		mean	147.667			mean	3			mean	1
	#3 Upf2 fl/fl	section #1	131		#3 Upf2 mut	section #1	0		#3 Pelo mut	section #1	0
		section #2	130			section #2	5			section #2	1
		section #3	118			section #3	0			section #3	0
		mean	126.333			mean	1.66667			mean	0.333333

## Sheet: Panel I
	BrdU (24h)
	E13.5		Brdu+ (EGL)				Brdu+ (EGL)				Brdu+ (EGL)
	#1 Upf2 fl/fl	section #1	39		#1 Upf2 mut	section #1	0		#1 Pelo mut	section #1	0
		section #2	40			section #2	0			section #2	0
		section #3	42			section #3	0			section #3	0
		mean	40.3333			mean	0			mean	0
	#2 Upf2 fl/fl	section #1	27		#2 Upf2 mut	section #1	0		#2 Pelo mut	section #1	0
		section #2	42			section #2	0			section #2	0
		section #3	53			section #3	0			section #3	0
		mean	40.6667			mean	0			mean	0
	#3 Upf2 fl/fl	section #1	44		#3 Upf2 mut	section #1	0		#3 Pelo mut	section #1	0
		section #2	51			section #2	0			section #2	0
		section #3	37			section #3	0			section #3	0
		mean	44			mean	0			mean	0

## Sheet: Panel K
	CC3
	E13.5
	#1 Upf2 fl/fl	section #1	6		#1 Upf2 mut	section #1	20		#1 Pelo mut	section #1	22		#1 Hbs1l mut	section #1	6
		section #2	6			section #2	30			section #2	26			section #2	11
		section #3	5			section #3	22							section #3	12
		mean	5.66667			mean	24			mean	24			mean	9.66667
	#2 Upf2 fl/fl	section #1	5		#2 Upf2 mut	section #1	30		#2 Pelo mut	section #1	25		#2 Hbs1l mut	section #1	15
		section #2	8			section #2	29			section #2	24			section #2	13
		section #3	4			section #3	25			section #3	38			section #3	5
		mean	5.66667			mean	28			mean	29			mean	11
	#3 Upf2 fl/fl	section #1	4		#3 Upf2 mut	section #1	39		#3 Pelo mut	section #1	25		#3 Hbs1l mut	section #1	9
		section #2	8			section #2	31			section #2	30			section #2	13
		section #3	6			section #3	27			section #3	33			section #3	13
		mean	6			mean	32.3333			mean	29.3333			mean	11.6667

## Sheet: Panel M
	P-S6
	E13.5		Intensity				Intensity				Intensity
	#1 Upf2 fl/fl	section #1	10.64		#1 Upf2 mut	section #1	24.546		#1 Pelo mut	section #1	19.224
		section #2	8.055			section #2	15.432			section #2	17.79
		section #3	12.949			section #3	17.609			section #3	15.955
		mean Intenisty	10.548			mean Intenisty	19.1957			mean Intenisty	17.6563
		relative Intensity	1.04594			relative Intensity	1.90345			relative Intensity	1.75081
	#2 Upf2 fl/fl	section #1	10.912		#2 Upf2 mut	section #1	12.459		#2 Pelo mut	section #1	24.505
		section #2	8.247			section #2	21.305			section #2	23.008
		section #3	12.495			section #3	15.128			section #3	15.815
		mean Intenisty	10.5513			mean Intenisty	16.2973			mean Intenisty	21.1093
		relative Intensity	1.04627			relative Intensity	1.61605			relative Intensity	2.09321
	#3 Upf2 fl/fl	section #1	12.105		#3 Upf2 mut	section #1	16.689		#3 Pelo mut	section #1	15.533
		section #2	4.642			section #2	14.146			section #2	23.735
		section #3	10.717			section #3	14.168			section #3	15.297
		mean Intenisty	9.15467			mean Intenisty	15.001			mean Intenisty	18.1883
		relative Intensity	0.907781			relative Intensity	1.48751			relative Intensity	1.80356
		mean Intensity	10.0847			mean Intensity	16.8313			mean Intensity	18.9847
		SD	0.805405			SD	2.14771			SD	1.85914
		mean rel. Intensity	1			mean rel. Intensity	1.669			mean rel. Intensity	1.88253
		SD	0.0798644			SD	0.212968			SD	0.184353
