# Supplementary material for: Defects in translation-dependent quality control pathways lead to convergent molecular and neurodevelopmental pathology
Source: eLife. 2021 Apr 26;10:e66904. doi: 10.7554/eLife.66904 (PMC8075583; doi:10.7554/eLife.66904)
Supplement: Figure 7—source data 1. [file elife-66904-fig7-data1.xlsx]

## Sheet: Panel D
	BrdU (24h)
	lobule IV/V EGL
	P6		total BrdU+	BrdU+ ; Ki67-	cycle exit				total BrdU+	BrdU+ ; Ki67-	cycle exit				total BrdU+	BrdU+ ; Ki67-	cycle exit				total BrdU+	BrdU+ ; Ki67-	cycle exit
	#1 Atoh1 Upf2 fl/+	section #1	995	385	38.6935		#1 Upf2 mut	section #1	383	117	30.5483		#1 Pelo mut	section #1	256	79	30.8594		#1 Hbs1l mut	section #1	716	412	57.5419
		section #2	831	383	46.089			section #2	464	139	29.9569			section #2	335	116	34.6269			section #2	576	309	53.6458
		section #3	983	521	53.001			section #3	335	114	34.0299			section #3	263	65	24.7148			section #3	617	318	51.5397
				mean	45.9278					mean	31.5117					mean	30.067					mean	54.2425
	#2 Atoh1 Upf2 fl/+	section #1	934	389	41.6488		#2 Upf2 mut	section #1	299	101	33.7793		#2 Pelo mut	section #1	368	117	31.7935		#2 Hbs1l mut	section #1	663	298	44.9472
		section #2	774	291	37.5969			section #2	257	70	27.2374			section #2	405	98	24.1975			section #2	615	281	45.6911
		section #3	695	328	47.1942			section #3	249	88	35.3414			section #3	375	89	23.7333			section #3	596	271	45.4698
				mean	42.1467					mean	32.1193					mean	26.5748					mean	45.3694
	#3 Atoh1 Upf2 fl/+	section #1	918	466	50.7625		#3 Upf2 mut	section #1	252	76	30.1587		#3 Pelo mut	section #1	343	105	30.6122		#3 Hbs1l mut	section #1	674	333	49.4065
		section #2	920	438	47.6087			section #2	326	87	26.6871			section #2	375	108	28.8			section #2	642	313	48.7539
		section #3	901	444	49.2786			section #3	351	82	23.3618			section #3	331	75	22.6586			section #3	585	310	52.9915
				mean	49.2166					mean	26.7359					mean	27.357					mean	50.384
	lobule IX EGL
	P6		total BrdU+	BrdU+ ; Ki67-	cycle exit				total BrdU+	BrdU+ ; Ki67-	cycle exit				total BrdU+	BrdU+ ; Ki67-	cycle exit				total BrdU+	BrdU+ ; Ki67-	cycle exit
	#1 Atoh1 Upf2 fl/+	section #1	745	326	43.7584		#1 Upf2 mut	section #1	663	270	40.724		#1 Pelo mut	section #1	501	219	43.7126		#1 Hbs1l mut	section #1	588	282	47.9592
		section #2	531	233	43.8795			section #2	709	269	37.9408			section #2	568	236	41.5493			section #2	424	226	53.3019
		section #3	772	323	41.8394			section #3	598	242	40.4682			section #3	542	240	44.2804			section #3	455	177	38.9011
				mean	43.1591					mean	39.711					mean	43.1808					mean	46.7207
	#2 Atoh1 Upf2 fl/+	section #1	736	346	47.0109		#2 Upf2 mut	section #1	890	471	52.9213		#2 Pelo mut	section #1	934	389	41.6488		#2 Hbs1l mut	section #1	420	165	39.2857
		section #2	747	307	41.0977			section #2	950	436	45.8947			section #2	924	356	38.5281			section #2	394	162	41.1168
		section #3	729	251	34.4307			section #3	932	429	46.03			section #3	903	369	40.8638			section #3	357	131	36.6947
				mean	40.8464					mean	48.282					mean	40.3469					mean	39.0324
	#3 Atoh1 Upf2 fl/+	section #1	846	424	50.1182		#3 Upf2 mut	section #1	641	275	42.9017		#3 Pelo mut	section #1	861	356	41.3473		#3 Hbs1l mut	section #1	393	141	35.8779
		section #2	803	395	49.1905			section #2	788	340	43.1472			section #2	789	332	42.0786			section #2	353	131	37.1105
		section #3	822	425	51.7032			section #3	709	354	49.9295			section #3	760	372	48.9474			section #3	539	248	46.0111
				mean	50.3373					mean	45.3261					mean	44.1244					mean	39.6665

## Sheet: Panel E
	NeuN+ cells (IGL)
	lobule IV/V
	P6		NeuN+ cells				NeuN+ cells				NeuN+ cells				NeuN+ cells
	#1 Atoh1 Upf2 fl/+	section #1	569		#1 Upf2 mut	section #1	361		#1 Pelo mut	section #1	261		#1 Hbs1l mut	section #1	562
		section #2	504			section #2	334			section #2	288			section #2	506
		section #3	534			section #3	318			section #3	309			section #3	637
		mean	535.667			mean	337.667			mean	286			mean	568.333
	#2 Atoh1 Upf2 fl/+	section #1	510		#2 Upf2 mut	section #1	301		#2 Pelo mut	section #1	313		#2 Hbs1l mut	section #1	480
		section #2	588			section #2	319			section #2	301			section #2	532
		section #3	587			section #3	312			section #3	308			section #3	693
		mean	561.667			mean	310.667			mean	307.333			mean	568.333
	#3 Atoh1 Upf2 fl/+	section #1	543		#3 Upf2 mut	section #1	289		#3 Pelo mut	section #1	277		#3 Hbs1l mut	section #1	586
		section #2	522			section #2	320			section #2	364			section #2	574
		section #3	625			section #3	303			section #3	259			section #3	605
		mean	563.333			mean	304			mean	300			mean	588.333
	lobule IX
	P6		NeuN+ cells				NeuN+ cells				NeuN+ cells				NeuN+ cells
	#1 Atoh1 Upf2 fl/+	section #1	921		#1 Upf2 mut	section #1	897		#1 Pelo mut	section #1	799		#1 Hbs1l mut	section #1	865
		section #2	749			section #2	873			section #2	838			section #2	874
		section #3	891			section #3	856			section #3	889			section #3	917
		mean	853.667			mean	875.333			mean	842			mean	885.333
	#2 Atoh1 Upf2 fl/+	section #1	784		#2 Upf2 mut	section #1	824		#2 Pelo mut	section #1	774		#2 Hbs1l mut	section #1	856
		section #2	927			section #2	786			section #2	817			section #2	778
		section #3	854			section #3	794			section #3	923			section #3	890
		mean	855			mean	801.333			mean	838			mean	841.333
	#3 Atoh1 Upf2 fl/+	section #1	840		#3 Upf2 mut	section #1	906		#3 Pelo mut	section #1	821		#3 Hbs1l mut	section #1	838
		section #2	873			section #2	834			section #2	877			section #2	803
		section #3	944			section #3	877			section #3	886			section #3	921
		mean	885.667			mean	872.333			mean	861.333			mean	854
