# Supplementary material for: Defects in translation-dependent quality control pathways lead to convergent molecular and neurodevelopmental pathology
Source: eLife. 2021 Apr 26;10:e66904. doi: 10.7554/eLife.66904 (PMC8075583; doi:10.7554/eLife.66904)
Supplement: Supplementary file 1. [file elife-66904-supp1.xlsx]

## Sheet: Hbs1l delta
	Hbs1l KO
		Pup #	Genotype				Embryo #	Genotype				Embryo #	Genotype				Embryo #	Genotype				Embryo #	Genotype				Embryo #	Genotype
	P0 (birth)	#1	Δ/+ Hbs1l			E11.5	E #1	Δ/+ Hbs1l			E10.5	E #1	Δ/+ Hbs1l			E9.5	E #1	Δ/+ Hbs1l			E8.5	E #1	Δ/+ Hbs1l			E7.5	E #1	Δ/+ Hbs1l
		#2	Δ/+ Hbs1l				E #2	+/+ Hbs1l				E #2	+/+ Hbs1l				E #2	Δ/+ Hbs1l				E #2	Δ/+ Hbs1l				E #2	+/+ Hbs1l
		#3	Δ/+ Hbs1l				E #3	+/+ Hbs1l				E #3	Δ/+ Hbs1l				E #3	+/+ Hbs1l				E #3	Δ/Δ Hbs1l				E #3	Δ/+ Hbs1l
		#4	Δ/+ Hbs1l				E #4	Δ/+ Hbs1l				E #4	Δ/Δ Hbs1l				E #4	Δ/Δ Hbs1l				E #4	Δ/+ Hbs1l				E #4	Δ/Δ Hbs1l
		#5	+/+ Hbs1l				E #5	+/+ Hbs1l				E #5	Δ/+ Hbs1l				E #5	Δ/+ Hbs1l				E #5	Δ/Δ Hbs1l				E #5	Δ/+ Hbs1l
		#6	Δ/+ Hbs1l				E #6	Δ/+ Hbs1l				E #6	Δ/+ Hbs1l				E #6	+/+ Hbs1l				E #6	Δ/+ Hbs1l				E #6	Δ/Δ Hbs1l
		#7	+/+ Hbs1l				E #7	Δ/+ Hbs1l				E #7	Δ/+ Hbs1l				E #7	Δ/Δ Hbs1l				E #7	Δ/+ Hbs1l				E #7	Δ/+ Hbs1l
		#8	Δ/+ Hbs1l				E #8	Δ/+ Hbs1l				E #8	Δ/+ Hbs1l				E #8	Δ/Δ Hbs1l				E #8	Δ/+ Hbs1l				E#8	Δ/+ Hbs1l
		#9	Δ/+ Hbs1l				E #9	Δ/+ Hbs1l				E #9	Δ/+ Hbs1l				E #9	+/+ Hbs1l				E #9	Δ/+ Hbs1l				E#9	Δ/+ Hbs1l
		#10	+/+ Hbs1l									E #10	+/+ Hbs1l				E #10	Δ/+ Hbs1l				E #10	Δ/+ Hbs1l				E#10	Δ/Δ Hbs1l
		#11	+/+ Hbs1l									E #11	Δ/Δ Hbs1l				E #11	Δ/+ Hbs1l				E #11	+/+ Hbs1l				E#11	Δ/+ Hbs1l
		#12	Δ/+ Hbs1l									E #12	Δ/+ Hbs1l				E #12	Δ/Δ Hbs1l				E #12	+/+ Hbs1l				E#12	+/+ Hbs1l
		#13	Δ/+ Hbs1l									E #13	Δ/Δ Hbs1l				E #13	Δ/+ Hbs1l				E# 13	Δ/+ Hbs1l				E#13	+/+ Hbs1l
		#14	Δ/+ Hbs1l									E #14	+/+ Hbs1l				E #14	+/+ Hbs1l				E# 14	+/+ Hbs1l				E#14	Δ/Δ Hbs1l
		#15	Δ/+ Hbs1l									E #15	Δ/Δ Hbs1l				E #15	Δ/+ Hbs1l				E# 15	Δ/+ Hbs1l				E#15	+/+ Hbs1l
		#16	+/+ Hbs1l									E #16	Δ/+ Hbs1l				E# 16	Δ/+ Hbs1l				E# 16	Δ/Δ Hbs1l				E#16	Δ/+ Hbs1l
		#17	Δ/+ Hbs1l									E #17	Δ/+ Hbs1l				E #17	Δ/Δ Hbs1l				E# 17	Δ/Δ Hbs1l				E#17	Δ/+ Hbs1l
		#18	Δ/+ Hbs1l									E #18	+/+ Hbs1l				E# 18	Δ/+ Hbs1l				E#18	Δ/Δ Hbs1l				E#18	Δ/+ Hbs1l
		#19	Δ/+ Hbs1l									E #19	+/+ Hbs1l				E# 19	+/+ Hbs1l				E#19	+/+ Hbs1l				E#19	Δ/+ Hbs1l
		#20	Δ/+ Hbs1l									E #20	Δ/Δ Hbs1l				E# 20	Δ/+ Hbs1l				E#20	Δ/+ Hbs1l				E#20	Δ/+ Hbs1l
		#21	+/+ Hbs1l									E #21	Δ/+ Hbs1l									E#21	Δ/+ Hbs1l
		#22	Δ/+ Hbs1l
		#23	Δ/+ Hbs1l
		#24	Δ/+ Hbs1l
		#25	Δ/+ Hbs1l
		#26	+/+ Hbs1l
		#27	+/+ Hbs1l
		#28	Δ/+ Hbs1l
		#29	Δ/+ Hbs1l
		#30	+/+ Hbs1l
		Summary	30				Summary	9				Summary	21				Summary	20				Summary	21				Summary	20
				Observed	Expected				Observed	Expected				Observed	Expected				Observed	Expected				Observed	Expected				Observed	Expected
		+/+ Hbs1l	9	30	25		+/+ Hbs1l	3	33.3333	25		+/+ Hbs1l	5	23.8095	25		+/+ Hbs1l	5	25	25		+/+ Hbs1l	4	19.0476	25		+/+ Hbs1l	4	20	25
		Δ/Δ Hbs1l	0	0	50		Δ/Δ Hbs1l	0	0	50		Δ/Δ Hbs1l	5	23.8095	50		Δ/Δ Hbs1l	5	25	50		Δ/Δ Hbs1l	5	23.8095	50		Δ/Δ Hbs1l	4	20	50
		Δ/+ Hbs1l	21	70	25		Δ/+ Hbs1l	6	66.6667	25		Δ/+ Hbs1l	11	52.381	25		Δ/+ Hbs1l	10	50	25		Δ/+ Hbs1l	12	57.1429	25		Δ/+ Hbs1l	12	60	25

## Sheet: Hbs1l GTC
	Hbs1l GTC
		Embryo #	Genotype				Embryo #	Genotype				Embryo #	Genotype
	E9.5	#1	GTC/+ Hbs1l			E8.5	E #1	GTC/+ Hbs1l			E6.5	E #1	GTC/+ Hbs1l
		#2	+/+ Hbs1l				E #2	+/+ Hbs1l				E #2	GTC/+ Hbs1l
		#3	GTC/+ Hbs1l				E #3	GTC/+ Hbs1l				E #3	GTC/+ Hbs1l
		#4	+/+ Hbs1l				E #4	GTC/+ Hbs1l				E #4	+/+ Hbs1l
		#5	GTC/+ Hbs1l				E #5	GTC/+ Hbs1l				E #5	GTC/+ Hbs1l
		#6	GTC/+ Hbs1l				E #6	+/+ Hbs1l				E #6	GTC/+ Hbs1l
		#7	GTC/+ Hbs1l				E #7	GTC/+ Hbs1l				E #7	GTC/+ Hbs1l
							E #8	GTC/+ Hbs1l				E #8	GTC/+ Hbs1l
							E #9	+/+ Hbs1l				E #9	+/+ Hbs1l
							E #10	GTC/+ Hbs1l				E #10	GTC/+ Hbs1l
							E #11	GTC/+ Hbs1l				E #11	GTC/+ Hbs1l
							E #12	GTC/+ Hbs1l				E #12	GTC/+ Hbs1l
							E #13	GTC/+ Hbs1l				E #13	GTC/+ Hbs1l
							E #14	+/+ Hbs1l				E #14	GTC/+ Hbs1l
							E #15	+/+ Hbs1l				E #15	GTC/+ Hbs1l
							E #16	GTC/+ Hbs1l				E #16	+/+ Hbs1l
							E #17	GTC/+ Hbs1l				E #17	+/+ Hbs1l
												E #18	GTC/+ Hbs1l
												E #19	GTC/+ Hbs1l
												E #20	GTC/+ Hbs1l
												E #21	GTC/+ Hbs1l
												E #22	GTC/+ Hbs1l
												E #23	+/+ Hbs1l
												E #24	GTC/+ Hbs1l
												E #25	GTC/+ Hbs1l
												E #26	GTC/+ Hbs1l
												E #27	GTC/+ Hbs1l
												E #28	+/+ Hbs1l
												E #29	GTC/+ Hbs1l
												E #30	GTC/+ Hbs1l
												E #31	+/+ Hbs1l
												E #32	GTC/+ Hbs1l
												E #33	GTC/+ Hbs1l
												E #34	GTC/+ Hbs1l
												E #35	GTC/+ Hbs1l
		Summary	7				Summary	17				Summary	35
				Observed	Expected				Observed	Expected				Observed	Expected
		+/+ Hbs1l	2	28.5714	25		+/+ Hbs1l	5	29.4118	25		+/+ Hbs1l	7	20	25
		GTC/GTC Hbs1l	0	0	50		GTC/GTC Hbs1l	0	0	50		GTC/GTC Hbs1l	0	0	50
		GTC/+ Hbs1l	5	71.4286	25		GTC/+ Hbs1l	12	70.5882	25		GTC/+ Hbs1l	28	80	25
