# Supplementary material for: Defects in translation-dependent quality control pathways lead to convergent molecular and neurodevelopmental pathology
Source: eLife. 2021 Apr 26;10:e66904. doi: 10.7554/eLife.66904 (PMC8075583; doi:10.7554/eLife.66904)
Supplement: Supplementary file 2. [file elife-66904-supp2.xlsx]

## Sheet: Hbs1l embryo
ensembl_gene_id	genome_index	ensembl_transcript_id	external_gene_name	transcript_biotype	region	P_codon	A_codon	chrom	strand	coordinate	relative_start	relative_end	spliced_start	spliced_end	Control_embryo_rep1	Control_embryo_rep2	Control_embryo_rep3	Hbs1l_embryo_rep1	Hbs1l_embryo_rep2	Hbs1l_embryo_rep3	Hbs1l_pause_sum	Control_pause_sum	Hbs1l_pause_count	Control_pause_count	pause_difference
ENSMUSG00000000740	21676	ENSMUST00000000756	Rpl13	protein_coding	cds	GGA	CCT	chr8	+	555	151	-60	123103930	123103932	NA	NA	NA	10.2824	18.5273	26.059	54.8688	NA	3	0	3
ENSMUSG00000000805	3892	ENSMUST00000150596, ENSMUST00000127827	Car4	nonsense_mediated_decay	3utr	NA	NA	chr11	+	363	149	33	84963448	84963450	NA	NA	NA	12.3074	35.3667	15.1687	62.8428	NA	3	0	3
ENSMUSG00000000902	1573	ENSMUST00000140388	Smarcb1	nonsense_mediated_decay	3utr	NA	NA	chr10	-	910	715	479	75897576	75904384	NA	NA	NA	12.5	15.7501	48.4693	76.7195	NA	3	0	3
ENSMUSG00000000902	1574	ENSMUST00000000925, ENSMUST00000121304	Smarcb1	protein_coding	cds	AGT	GAG	chr10	-	1191	323	-57	75904386	75904384	NA	NA	NA	11.5812	16.2635	35.2729	63.1175	NA	3	0	3
ENSMUSG00000001056	3147	ENSMUST00000127405	Nhp2	protein_coding	cds	CAT	GAA	chr11	+	476	131	-22	51623148	51623150	NA	NA	NA	22.0656	40.5724	35.7794	98.4174	NA	3	0	3
ENSMUSG00000001416	14342	ENSMUST00000001452, ENSMUST00000164166, ENSMUST00000168062	Cct3	protein_coding	cds	CAG	CAC	chr3	+	938.667	287.333	-237	88313563	88313565	NA	NA	NA	12.0715	12.0621	13.1829	37.3165	NA	3	0	3
ENSMUSG00000001416	14343	ENSMUST00000163735	Cct3	protein_coding	cds	AGC	ACT	chr3	+	474	157.5	-147.5	88313564	88313566	NA	NA	NA	11.5122	12.3193	13.1829	37.0144	NA	3	0	3
ENSMUSG00000001418	14371	ENSMUST00000177005, ENSMUST00000176519, ENSMUST00000001454	Glmp	protein_coding	cds	CCA	AAT	chr3	+	166.667	48.5	-247.667	88325703	88325705	NA	NA	NA	18.3418	28	23	69.3418	NA	3	0	3
ENSMUSG00000001440	4136	ENSMUST00000001479	Kpnb1	protein_coding	cds	GCT	CTT	chr11	-	2456	719.5	-156	97165040	97165038	NA	NA	NA	14.171	16.7698	23.1497	54.0905	NA	3	0	3
ENSMUSG00000001445	4130	ENSMUST00000001485	Mrpl10	protein_coding	cds	CCC	GAT	chr11	+	806	255	-7	97048311	97048313	NA	NA	NA	17.9956	39.7393	41.4418	99.1767	NA	3	0	3
ENSMUSG00000001473	11471	ENSMUST00000001513	Tubb6	protein_coding	cds	CCA	CGT	chr18	+	821	260	-187	67401812	67401814	NA	NA	NA	14.7947	13.8564	16.6759	45.327	NA	3	0	3
ENSMUSG00000001525	10583	ENSMUST00000001566	Tubb5	protein_coding	cds	GGC	TTT	chr17	-	1057	268	-176	35835513	35835511	NA	NA	NA	17.651	27.6557	20.8333	66.14	NA	3	0	3
ENSMUSG00000001525	10606	ENSMUST00000134978	Tubb5	protein_coding	5utr	NA	NA	chr17	-	548	-15	-214	35836238	35836236	NA	NA	NA	10.0493	24.9066	19.3851	54.341	NA	3	0	3
ENSMUSG00000001847	17669	ENSMUST00000080537, ENSMUST00000100489	Rac1	protein_coding	cds	GAC	GAA	chr5	-	753	178.5	-23	143507047	143507045	NA	NA	NA	10.3098	22.6779	15.2752	48.2629	NA	3	0	3
ENSMUSG00000001924	23610	ENSMUST00000089217, ENSMUST00000001989	Uba1	protein_coding	cds	CTG	GAA	chrX	+	718.5	168	-890	20670227	20670229	NA	NA	NA	22.6536	13.8483	16.3862	52.888	NA	3	0	3
ENSMUSG00000002014	23784	ENSMUST00000002090, ENSMUST00000166518	Ssr4	protein_coding	cds	TCA	CTG	chrX	+	352.5	52.5	-120	73788926	73788928	NA	NA	NA	11.6087	16.7139	12.336	40.6586	NA	3	0	3
ENSMUSG00000002014	23785	ENSMUST00000002090, ENSMUST00000166518	Ssr4	protein_coding	cds	CCC	CTG	chrX	+	580.5	127.833	-44.3333	73790394	73790396	NA	NA	NA	12.7593	17.0712	23.003	52.8335	NA	3	0	3
ENSMUSG00000002102	13058	ENSMUST00000146506	Psmc3	nonsense_mediated_decay	cds	AAT	CAA	chr2	+	171	57	-145	91055034	91055036	NA	NA	NA	12.7985	27.7657	28.8675	69.4317	NA	3	0	3
ENSMUSG00000002102	13059	ENSMUST00000067663, ENSMUST00000002171, ENSMUST00000185715	Psmc3	protein_coding	cds	ATC	AAA	chr2	+	359	68.6667	-330.667	91055035	91055037	NA	NA	NA	13.5173	29.6302	34.0637	77.2112	NA	3	0	3
ENSMUSG00000002900	5248	ENSMUST00000169088, ENSMUST00000002979	Lamb1	protein_coding	cds	ATC	ATT	chr12	+	2952	930	-880	31304617	31304619	NA	NA	NA	10.9333	44.5479	19.2097	74.6909	NA	3	0	3
ENSMUSG00000002981	19289	ENSMUST00000055242	Clptm1	protein_coding	cds	ATT	GAA	chr7	-	1417	462	-201	19635335	19635333	NA	NA	NA	12.1321	18.4188	31.8362	62.3871	NA	3	0	3
ENSMUSG00000002984	19374	ENSMUST00000093552, ENSMUST00000032555	Tomm40	protein_coding	cds	CCC	TTG	chr7	-	1127.5	333	-28	19701805	19701803	NA	NA	NA	14.3434	16.2635	27.1734	57.7803	NA	3	0	3
ENSMUSG00000002985	19343	ENSMUST00000174064	Apoe	protein_coding	cds	CAG	AGC	chr7	-	612	137	-174	19696883	19696881	NA	NA	NA	17.8979	23.7383	29.2412	70.8773	NA	3	0	3
ENSMUSG00000002985	19350	ENSMUST00000174064	Apoe	protein_coding	cds	CGC	AAC	chr7	-	564	121	-190	19696931	19696929	NA	NA	NA	13.2009	13.2895	21.1295	47.6199	NA	3	0	3
ENSMUSG00000002985	19351	ENSMUST00000173739, ENSMUST00000174355, ENSMUST00000003066, ENSMUST00000172983, ENSMUST00000174144, ENSMUST00000172808	Apoe	protein_coding	cds	CGC	AAC	chr7	-	454.167	119.167	-137.5	19696953	19696951	NA	NA	NA	11.4714	13.3842	24.1349	48.9906	NA	3	0	3
ENSMUSG00000003038	16117	ENSMUST00000105893, ENSMUST00000100472, ENSMUST00000136327, ENSMUST00000102553, ENSMUST00000102552	Hmgn2	protein_coding	cds	AAT	GGA	chr4	-	372.4	72.6	-22.8	133965975	133965973	NA	NA	NA	11.7214	29.5844	40.4521	81.758	NA	3	0	3
ENSMUSG00000003072	1747	ENSMUST00000105367, ENSMUST00000003156	Atp5d	protein_coding	cds	GGT	GCG	chr10	+	819	142	-26	80145464	80145466	NA	NA	NA	15.9976	32.558	19.1138	67.6694	NA	3	0	3
ENSMUSG00000003099	19275	ENSMUST00000142597	Ppp5c	protein_coding	cds	CAG	ACT	chr7	-	1056	352	-124	17006916	17006914	NA	NA	NA	10.4608	18.168	19.5703	48.1991	NA	3	0	3
ENSMUSG00000003153	18605	ENSMUST00000166135	Slc2a3	nonsense_mediated_decay	3utr	NA	NA	chr6	-	1116	1115	924	122730136	122730134	NA	NA	NA	13.393	25.6119	13.3141	52.319	NA	3	0	3
ENSMUSG00000003153	18638	ENSMUST00000166135	Slc2a3	nonsense_mediated_decay	3utr	NA	NA	chr6	-	632	631	440	122735491	122735489	NA	NA	NA	16.8526	29.4347	16.6374	62.9247	NA	3	0	3
ENSMUSG00000003153	18640	ENSMUST00000166135	Slc2a3	nonsense_mediated_decay	3utr	NA	NA	chr6	-	537	536	345	122735586	122735584	NA	NA	NA	20.3122	24.0023	12.7186	57.0331	NA	3	0	3
ENSMUSG00000003779	11125	ENSMUST00000166044	Kif20a	protein_coding	cds	AAA	CGT	chr18	+	976	240.5	-646	34628076	34628078	NA	NA	NA	17.6075	22.1352	12.8458	52.5885	NA	3	0	3
ENSMUSG00000003779	11126	ENSMUST00000167161	Kif20a	protein_coding	cds	AAA	CGT	chr18	+	985	240.5	-646	34628087	34628089	NA	NA	NA	17.6075	22.1352	12.8458	52.5885	NA	3	0	3
ENSMUSG00000004285	17962	ENSMUST00000004396, ENSMUST00000149646	Atp6v1f	protein_coding	cds	AAA	GAC	chr6	+	453.5	77	-18	29470211	29470213	NA	NA	NA	11.6275	18.0993	18.9195	48.6464	NA	3	0	3
ENSMUSG00000004865	10249	ENSMUST00000004987	Srpk1	nonsense_mediated_decay	3utr	NA	NA	chr17	-	1232	1231	561	28592225	28592223	NA	NA	NA	15.9506	13.1762	10.7795	39.9063	NA	3	0	3
ENSMUSG00000004897	14302	ENSMUST00000005017	Hdgf	protein_coding	cds	ATG	AAA	chr3	+	364	18.5	-218	87906684	87906686	NA	NA	NA	11.2413	26.1625	21.5856	58.9894	NA	3	0	3
ENSMUSG00000004980	18118	ENSMUST00000114459	Hnrnpa2b1	protein_coding	cds	AAT	GAT	chr6	-	1050	300	-53	51464437	51464435	NA	NA	NA	10.2002	13.0868	11.0152	34.3022	NA	3	0	3
ENSMUSG00000005312	6886	ENSMUST00000058735	Ubqln1	protein_coding	cds	ATT	ATG	chr13	-	814	199	-383	58193339	58193337	NA	NA	NA	16.7592	16.0317	19.3165	52.1074	NA	3	0	3
ENSMUSG00000005312	6887	ENSMUST00000076454	Ubqln1	protein_coding	cds	ATT	ATG	chr13	-	780	199	-355	58193373	58193371	NA	NA	NA	16.7592	16.0317	19.3165	52.1074	NA	3	0	3
ENSMUSG00000005410	21163	ENSMUST00000164309	Mcm5	protein_coding	cds	GGC	ATT	chr8	+	82	6.5	-727	75109609	75109611	NA	NA	NA	10.3709	23.3167	14.3485	48.0361	NA	3	0	3
ENSMUSG00000005481	21252	ENSMUST00000019576, ENSMUST00000109810, ENSMUST00000172396	Ddx39	protein_coding	cds	ATT	GAG	chr8	+	1445.33	422	-5	83723033	83723125	NA	NA	NA	10.5944	27.2035	21.0455	58.8434	NA	3	0	3
ENSMUSG00000005481	21253	ENSMUST00000140521	Ddx39	nonsense_mediated_decay	3utr	NA	NA	chr8	+	1400	1325	699	83723034	83723126	NA	NA	NA	10.3196	28.9914	19.9755	59.2865	NA	3	0	3
ENSMUSG00000005566	19194	ENSMUST00000005705	Trim28	protein_coding	cds	TTG	GAA	chr7	+	1302	245	-589	13027842	13027844	NA	NA	NA	10.0645	10.8547	10.142	31.0612	NA	3	0	3
ENSMUSG00000005575	19233	ENSMUST00000123541, ENSMUST00000165394	Ube2m	protein_coding	cds, 5utr	ACG, NA	ACC, NA	chr7	-	143	-34	-235	13036607	13036605	NA	NA	NA	11.114	12.0388	27.7439	50.8967	NA	3	0	3
ENSMUSG00000005575	19234	ENSMUST00000005714, ENSMUST00000125964	Ube2m	protein_coding	cds	GAC	GAC	chr7	-	416	48	-129	13036608	13036606	NA	NA	NA	10.6421	10.681	27.2381	48.5612	NA	3	0	3
ENSMUSG00000005625	14538	ENSMUST00000117355, ENSMUST00000107237, ENSMUST00000071664	Psmd4	protein_coding	cds	GAC	ACT	chr3	-	234.667	65.5	-308.333	95035894	95035892	NA	NA	NA	10.0429	11.2274	10.9333	32.2036	NA	3	0	3
ENSMUSG00000005779	14522	ENSMUST00000005923	Psmb4	protein_coding	cds	TCA	CTG	chr3	-	593	180	-84	94885696	94885694	NA	NA	NA	13.1471	27.8494	54.3152	95.3117	NA	3	0	3
ENSMUSG00000005846	9239	ENSMUST00000119953	Rsl1d1	protein_coding	cds	GAG	ACT	chr16	-	1267	396.5	-55	11193648	11193646	NA	NA	NA	12.9307	14.7138	12.0607	39.7053	NA	3	0	3
ENSMUSG00000006024	19248	ENSMUST00000006181	Napa	protein_coding	cds	ATG	AGA	chr7	+	531	104	-191	16112600	16112602	NA	NA	NA	22.6537	32.7913	16.1658	71.6108	NA	3	0	3
ENSMUSG00000006024	19249	ENSMUST00000127637	Napa	nonsense_mediated_decay	3utr	NA	NA	chr7	+	302	232	26	16112601	16112603	NA	NA	NA	21.2226	35.2184	17.0884	73.5294	NA	3	0	3
ENSMUSG00000006050	11234	ENSMUST00000173875	Sra1	protein_coding	cds	GAG	AAC	chr18	-	1167	219.5	-12	36668757	36668755	NA	NA	NA	12.0037	12.2202	13.5677	37.7917	NA	3	0	3
ENSMUSG00000006169	3002	ENSMUST00000109261, ENSMUST00000109260	Clint1	protein_coding	cds	GGT	GAA	chr11	+	929	246.5	-385	45894003	45894005	NA	NA	NA	22.1381	26.092	65.9119	114.142	NA	3	0	3
ENSMUSG00000006304	516	ENSMUST00000113820, ENSMUST00000006467, ENSMUST00000113819	Arpc2	protein_coding	cds	GCA	AAA	chr1	+	1017	261.167	-33	74264376	74264378	NA	NA	NA	15.8757	19.2973	15.1448	50.3178	NA	3	0	3
ENSMUSG00000006333	19031	ENSMUST00000108624, ENSMUST00000139818, ENSMUST00000126562, ENSMUST00000146927	Rps9	protein_coding, nonsense_mediated_decay	cds	CCA	CGG	chr7	+	96.75	14	-87.75	3704396	3704398	NA	NA	NA	10.5861	11.916	13.8644	36.3665	NA	3	0	3
ENSMUSG00000006333	19035	ENSMUST00000108623, ENSMUST00000139818, ENSMUST00000108625, ENSMUST00000108624, ENSMUST00000126562, ENSMUST00000146927, ENSMUST00000006496	Rps9	protein_coding, nonsense_mediated_decay	cds	AAC	AAA	chr7	+	207.714	37.4286	-96	3704662	3704664	NA	NA	NA	13.0999	14.3986	16.0011	43.4996	NA	3	0	3
ENSMUSG00000006333	19043	ENSMUST00000006496, ENSMUST00000108623, ENSMUST00000108625, ENSMUST00000126562, ENSMUST00000146927	Rps9	protein_coding, nonsense_mediated_decay	cds	ATC	CTG	chr7	+	380.8	94.7	-64.9	3705800	3705802	NA	NA	NA	12.0024	39.6406	29.1347	80.7776	NA	3	0	3
ENSMUSG00000006333	19046	ENSMUST00000108623, ENSMUST00000126562, ENSMUST00000146927, ENSMUST00000006496, ENSMUST00000108625	Rps9	protein_coding, nonsense_mediated_decay	cds	GGC	CTG	chr7	+	443.8	116.2	-43.4	3705863	3705865	NA	NA	NA	10.9735	12.4036	16.0717	39.4489	NA	3	0	3
ENSMUSG00000006369	8715	ENSMUST00000057410, ENSMUST00000109432	Fbln1	protein_coding	cds	CTA	GGC	chr15	+	1069	304	-391	85232660	85232662	NA	NA	NA	10.5706	29.6786	31.2447	71.4938	NA	3	0	3
ENSMUSG00000006369	8720	ENSMUST00000109432	Fbln1	protein_coding	cds	AAC	ATC	chr15	+	1920	597	-88	85251532	85251534	NA	NA	NA	14.7849	22.8244	26.1894	63.7987	NA	3	0	3
ENSMUSG00000006442	16295	ENSMUST00000006611	Srm	protein_coding	cds	GAC	CCC	chr4	+	642	175	-127	148593431	148593433	NA	NA	NA	30.3921	17.93	13.7478	62.07	NA	3	0	3
ENSMUSG00000006498	1709	ENSMUST00000172282, ENSMUST00000165704, ENSMUST00000095457	Ptbp1	protein_coding	cds	GGC	GAG	chr10	+	1667.33	509.333	-15	79863229	79863231	NA	NA	NA	12.1374	11.2865	21.8861	45.3101	NA	3	0	3
ENSMUSG00000006728	2262	ENSMUST00000142558, ENSMUST00000006911, ENSMUST00000120226, ENSMUST00000133115	Cdk4	nonsense_mediated_decay, protein_coding	5utr	NA	NA	chr10	+	149.5	-44.5	-637	127063736	127063738	NA	NA	NA	13.7187	31.565	24.1967	69.4804	NA	3	0	3
ENSMUSG00000006932	23228	ENSMUST00000154356, ENSMUST00000007130, ENSMUST00000145093	Ctnnb1	nonsense_mediated_decay, protein_coding	cds	CCT	GAG	chr9	+	689.333	153	-367.333	120951111	120951113	NA	NA	NA	10.6801	39.1065	31.2873	81.0739	NA	3	0	3
ENSMUSG00000006932	23229	ENSMUST00000170729, ENSMUST00000130845, ENSMUST00000163844	Ctnnb1	nonsense_mediated_decay	cds, 3utr	CTG, NA	AGC, NA	chr9	+	252	224.667	2	120951112	120951114	NA	NA	NA	10.4846	28.058	26.0272	64.5697	NA	3	0	3
ENSMUSG00000006932	23240	ENSMUST00000163844	Ctnnb1	nonsense_mediated_decay	3utr	NA	NA	chr9	+	753	752	480	120951728	120951730	NA	NA	NA	14.0052	19.4632	10.3341	43.8025	NA	3	0	3
ENSMUSG00000006998	9391	ENSMUST00000007212	Psmd2	protein_coding	cds	GAT	CCA	chr16	+	2216	717	-191	20661681	20661683	NA	NA	NA	17.5655	14.9899	15.199	47.7545	NA	3	0	3
ENSMUSG00000007029	10507	ENSMUST00000087315, ENSMUST00000173584	Vars	protein_coding	cds	TTG	GAG	chr17	+	3321	1025	-245	35014774	35014776	NA	NA	NA	13.771	17.9353	20.4315	52.1378	NA	3	0	3
ENSMUSG00000007029	10515	ENSMUST00000087315, ENSMUST00000173584	Vars	protein_coding	cds	CCC	CTT	chr17	+	3936	1230	-40	35015886	35015888	NA	NA	NA	12.6921	36.0844	15.1579	63.9344	NA	3	0	3
ENSMUSG00000007041	10518	ENSMUST00000007257	Clic1	protein_coding	cds	CTG	GAG	chr17	+	731	82.5	-158	35052880	35052882	NA	NA	NA	16.3174	14.9751	18.6191	49.9116	NA	3	0	3
ENSMUSG00000007041	10520	ENSMUST00000007257	Clic1	protein_coding	cds	GAT	GAG	chr17	+	956	157.5	-83	35055318	35055320	NA	NA	NA	19.4733	15.5	10.9333	45.9067	NA	3	0	3
ENSMUSG00000007564	9916	ENSMUST00000007708, ENSMUST00000173658	Ppp2r1a	protein_coding, nonsense_mediated_decay	cds	ATT	GCG	chr17	+	143	12	-326.5	20945541	20945543	NA	NA	NA	18.0682	16.7377	21.4973	56.3032	NA	3	0	3
ENSMUSG00000007739	2779	ENSMUST00000173867, ENSMUST00000173853, ENSMUST00000174047, ENSMUST00000020562, ENSMUST00000174659	Cct4	protein_coding, nonsense_mediated_decay	cds	GAC	AAG	chr11	+	215.6	27	-227.8	22990834	22990836	NA	NA	NA	11.9841	21.9032	21.5643	55.4516	NA	3	0	3
ENSMUSG00000007739	2795	ENSMUST00000174047, ENSMUST00000174659	Cct4	nonsense_mediated_decay	cds, 3utr	GAC, NA	CTG, NA	chr11	+	379.5	160	28.5	22996392	22996394	NA	NA	NA	11.2194	19.413	20.4078	51.0402	NA	3	0	3
ENSMUSG00000007850	3096	ENSMUST00000109142, ENSMUST00000077817, ENSMUST00000069304	Hnrnph1	protein_coding	cds	GCT	GAA	chr11	+	666.333	164	-292.667	50381553	50381555	NA	NA	NA	16.1268	46.5873	40.1724	102.886	NA	3	0	3
ENSMUSG00000007850	3105	ENSMUST00000109142, ENSMUST00000077817, ENSMUST00000069304	Hnrnph1	protein_coding	cds	CCA	TAC	chr11	+	1062.33	296	-160.667	50383028	50383030	NA	NA	NA	13.2067	15.0253	16.6465	44.8785	NA	3	0	3
ENSMUSG00000008475	919	ENSMUST00000077755, ENSMUST00000097536	Arpc5	protein_coding	cds	GAC	GAA	chr1	+	231	15.5	-105.5	152766772	152766774	NA	NA	NA	13.9211	32.8484	29.8389	76.6084	NA	3	0	3
ENSMUSG00000008682	23827	ENSMUST00000008826, ENSMUST00000151702, ENSMUST00000074085, ENSMUST00000135690	Rpl10	protein_coding	cds	GGA	CGG	chrX	+	182	36	-162.5	74271825	74271827	NA	NA	NA	10.597	31.1333	20.8058	62.5361	NA	3	0	3
ENSMUSG00000008682	23835	ENSMUST00000008826, ENSMUST00000151702, ENSMUST00000074085, ENSMUST00000135690	Rpl10	protein_coding	cds	CTC	CAC	chrX	+	344	90	-108.5	74272258	74272260	NA	NA	NA	11.9201	29.0982	27.8696	68.8879	NA	3	0	3
ENSMUSG00000009575	9092	ENSMUST00000118152, ENSMUST00000108813, ENSMUST00000122182	Cbx5	protein_coding	cds	TCT	GAG	chr15	-	280.333	44	-147	103213077	103213075	NA	NA	NA	15.5366	11.4527	10.3333	37.3227	NA	3	0	3
ENSMUSG00000009927	22105	ENSMUST00000080300	Rps25	protein_coding	cds	GAT	AAA	chr9	+	670	17.5	-107.5	44410392	44410394	NA	NA	NA	10.2954	35.8735	32.046	78.2149	NA	3	0	3
ENSMUSG00000010095	11865	ENSMUST00000170157	Slc3a2	protein_coding	cds	GGC	TCC	chr19	-	1618	448	-117	8708077	8708075	NA	NA	NA	10.4083	18.0695	16.9434	45.4212	NA	3	0	3
ENSMUSG00000010095	11866	ENSMUST00000010239	Slc3a2	protein_coding	cds	GGC	TCC	chr19	-	1359	409	-117	8708094	8708194	NA	NA	NA	10.0346	17.3188	16.2553	43.6087	NA	3	0	3
ENSMUSG00000011752	12218	ENSMUST00000011896	Pgam1	protein_coding	cds	AAT	GAG	chr19	+	386	87	-167	41915674	41915676	NA	NA	NA	11.3769	24.0707	14.3165	49.764	NA	3	0	3
ENSMUSG00000011752	12225	ENSMUST00000011896	Pgam1	protein_coding	cds	CAC	CCC	chr19	+	512	129	-125	41915800	41915802	NA	NA	NA	11.0089	41.4121	26.6563	79.0773	NA	3	0	3
ENSMUSG00000011752	12226	ENSMUST00000011896	Pgam1	protein_coding	cds	ACT	GAA	chr19	+	560	145	-109	41915848	41915850	NA	NA	NA	11.3769	26.8328	64.8334	103.043	NA	3	0	3
ENSMUSG00000012405	7358	ENSMUST00000080281, ENSMUST00000100799, ENSMUST00000079419, ENSMUST00000112598, ENSMUST00000147121	Rpl15	protein_coding	cds	GAT	AAA	chr14	-	301.2	45	-139.4	18270316	18270314	NA	NA	NA	12.3137	43.6443	56.2256	112.184	NA	3	0	3
ENSMUSG00000013662	12146	ENSMUST00000070210	Atad1	protein_coding	cds	GAT	GAC	chr19	-	446	96	-265	32698623	32698621	NA	NA	NA	10.4424	27.0879	25.0453	62.5756	NA	3	0	3
ENSMUSG00000013701	7551	ENSMUST00000170331	Timm23	protein_coding	cds	TTG	AGA	chr14	-	316	65	-13	32189225	32189223	NA	NA	NA	11.4723	11.4332	15.8115	38.7171	NA	3	0	3
ENSMUSG00000014226	1011	ENSMUST00000014370	Cacybp	protein_coding	cds	AAG	AAA	chr1	-	676	155.5	-73	160205033	160205031	NA	NA	NA	11.9037	19.1878	12.2235	43.315	NA	3	0	3
ENSMUSG00000014349	4107	ENSMUST00000100528	Ube2z	protein_coding	cds	TAT	GAG	chr11	-	963	283	-73	96051785	96051783	NA	NA	NA	21.9989	15.7501	23.6117	61.3607	NA	3	0	3
ENSMUSG00000014867	12617	ENSMUST00000153641	Surf4	nonsense_mediated_decay	3utr	NA	NA	chr2	-	639	577	329	26922060	26922058	NA	NA	NA	12.4432	15.1396	10.0965	37.6793	NA	3	0	3
ENSMUSG00000014867	12622	ENSMUST00000153641	Surf4	nonsense_mediated_decay	3utr	NA	NA	chr2	-	417	355	107	26924455	26924453	NA	NA	NA	17.6646	12.415	15.9508	46.0304	NA	3	0	3
ENSMUSG00000014867	12623	ENSMUST00000015011	Surf4	protein_coding	cds	GTC	CCA	chr2	-	1038	144	-125	26924456	26924454	NA	NA	NA	16.3981	12.0814	12.336	40.8155	NA	3	0	3
ENSMUSG00000014956	16551	ENSMUST00000015100	Ppp1cb	protein_coding	cds	CCT	ATA	chr5	+	987	158	-169	32485893	32485895	NA	NA	NA	11.9882	21.7825	11.3726	45.1433	NA	3	0	3
ENSMUSG00000014959	12896	ENSMUST00000112201, ENSMUST00000028509, ENSMUST00000112205, ENSMUST00000133432	Gorasp2	protein_coding	cds	TTG	TTG	chr2	+	1007.75	275	-112.5	70688402	70688404	NA	NA	NA	13.4144	11.5579	11	35.9724	NA	3	0	3
ENSMUSG00000014980	911	ENSMUST00000162371	Tsen15	protein_coding	cds	GAT	GAC	chr1	-	368	119	-8	152371268	152371266	NA	NA	NA	10.8468	11.2789	28.232	50.3577	NA	3	0	3
ENSMUSG00000015013	21660	ENSMUST00000015157	Trappc2l	protein_coding	cds	GGA	GAC	chr8	+	369	117.5	-21	122614347	122614349	NA	NA	NA	15.2798	26.2747	12.1244	53.6788	NA	3	0	3
ENSMUSG00000015165	19529	ENSMUST00000172529, ENSMUST00000172884, ENSMUST00000174477	Hnrnpl	protein_coding	5utr, cds	NA, GGA	NA, AGC	chr7	+	179.333	-5.33333	-779	28813352	28813354	NA	NA	NA	15.276	78.0286	113.655	206.96	NA	3	0	3
ENSMUSG00000015165	19536	ENSMUST00000172529, ENSMUST00000172884, ENSMUST00000174548, ENSMUST00000174882, ENSMUST00000038572	Hnrnpl	protein_coding, nonsense_mediated_decay	cds	GAT	TCT	chr7	+	688.556	167.111	-213	28815102	28815104	NA	NA	NA	10.7415	16.5928	20.7643	48.0985	NA	3	0	3
ENSMUSG00000015176	12310	ENSMUST00000165017	Nolc1	protein_coding	cds	CCC	TCT	chr19	+	1076	303	-399	46082270	46082272	NA	NA	NA	14	10.0001	27.1734	51.1735	NA	3	0	3
ENSMUSG00000015176	12315	ENSMUST00000165017	Nolc1	protein_coding	cds	CCA	GCT	chr19	+	1640	491	-211	46083086	46083088	NA	NA	NA	17.4778	42.4578	31.4553	91.391	NA	3	0	3
ENSMUSG00000015656	21984	ENSMUST00000015800	Hspa8	protein_coding	cds	TAC	TTC	chr9	+	814	148	-498	40802771	40802773	NA	NA	NA	12.7274	24.9912	12.8147	50.5333	NA	3	0	3
ENSMUSG00000015656	21988	ENSMUST00000015800, ENSMUST00000117557	Hspa8	protein_coding	cds	CTC	AAT	chr9	+	680.5	156.5	-480	40802825	40802827	NA	NA	NA	13.1236	10.2525	13.1978	36.5739	NA	3	0	3
ENSMUSG00000015656	22008	ENSMUST00000015800, ENSMUST00000117557	Hspa8	protein_coding	cds	GCT	CGA	chr9	+	1079.5	289.5	-347	40803306	40803308	NA	NA	NA	15.6714	20.0825	12.5613	48.3152	NA	3	0	3
ENSMUSG00000015656	22049	ENSMUST00000015800, ENSMUST00000117557	Hspa8	protein_coding	cds	CAG	AAA	chr9	+	1967.5	585.5	-51	40804961	40804963	NA	NA	NA	11.6793	28.5673	25.5151	65.7617	NA	3	0	3
ENSMUSG00000015671	5814	ENSMUST00000170836	Psma2	protein_coding	cds	AAC	ATA	chr13	+	653	206	-28	14625380	14625382	NA	NA	NA	10.0077	19.2909	20.6942	49.9928	NA	3	0	3
ENSMUSG00000015749	14574	ENSMUST00000165307, ENSMUST00000015893, ENSMUST00000168106, ENSMUST00000170125	Anp32e	protein_coding	cds	AAT	GAC	chr3	+	316.857	36.5714	-165.143	95933965	95933967	NA	NA	NA	14.3265	29.6288	21.976	65.9312	NA	3	0	3
ENSMUSG00000016541	8725	ENSMUST00000163242	Atxn10	protein_coding	cds	TCA	GAC	chr15	+	1279	353	-122	85438123	85438125	NA	NA	NA	12.5066	20.3087	10.5	43.3153	NA	3	0	3
ENSMUSG00000016559	4643	ENSMUST00000106454, ENSMUST00000016703	H3f3b	protein_coding	cds	AAT	CTG	chr11	-	696	108	-28	116023494	116023492	NA	NA	NA	13.1636	11.5287	24.4928	49.1851	NA	3	0	3
ENSMUSG00000016921	13703	ENSMUST00000130411	Srsf6	protein_coding	cds	CCT	GTT	chr2	+	455	103	-235	162933481	162933483	NA	NA	NA	13.5463	14.1421	16.7349	44.4233	NA	3	0	3
ENSMUSG00000016921	13704	ENSMUST00000017065, ENSMUST00000126163	Srsf6	nonsense_mediated_decay, protein_coding	3utr	NA	NA	chr2	+	589	528.5	121.5	162933482	162933484	NA	NA	NA	16.3475	20.6602	25.9238	62.9315	NA	3	0	3
ENSMUSG00000016921	13710	ENSMUST00000130411	Srsf6	protein_coding	cds	AGA	AGG	chr2	+	746	201	-138	162934240	162934242	NA	NA	NA	14.0667	20.0594	20.3809	54.5071	NA	3	0	3
ENSMUSG00000016921	13722	ENSMUST00000130411	Srsf6	protein_coding	cds	CCA	AAA	chr2	+	1097	318	-21	162934691	162934693	NA	NA	NA	10.0444	14.6245	14.7966	39.4655	NA	3	0	3
ENSMUSG00000016946	9945	ENSMUST00000017090	Kctd5	protein_coding	cds	AGC	GAG	chr17	-	717	220	-14	24055940	24055938	NA	NA	NA	10.0509	30.2525	21.1667	61.47	NA	3	0	3
ENSMUSG00000017404	4220	ENSMUST00000092425, ENSMUST00000017548	Rpl19	protein_coding	cds	ATG	AGA	chr11	+	340	94	-101	98029444	98029446	NA	NA	NA	12.7729	39.599	23.6535	76.0254	NA	3	0	3
ENSMUSG00000017707	13729	ENSMUST00000017851	Serinc3	protein_coding	cds	GAC	GAC	chr2	-	788	230.5	-241	163631016	163631014	NA	NA	NA	15	18.2642	14.6059	47.8701	NA	3	0	3
ENSMUSG00000017760	13763	ENSMUST00000103093, ENSMUST00000103092, ENSMUST00000127650, ENSMUST00000143780	Ctsa	protein_coding	cds	CAC	TTC	chr2	+	439.25	62	-287.75	164834194	164834196	NA	NA	NA	13.3268	28.8286	20.4167	62.5721	NA	3	0	3
ENSMUSG00000018102	6520	ENSMUST00000018246	H2bc4	protein_coding	cds	TTC	GAG	chr13	+	243	69.5	-56.5	23684441	23684443	NA	NA	NA	12.3208	31.4553	11.3026	55.0787	NA	3	0	3
ENSMUSG00000018293	3589	ENSMUST00000178254	Pfn1	nonsense_mediated_decay	cds	TCA	ATG	chr11	-	297	51.5	-3	70652931	70652929	NA	NA	NA	13.4098	23.9165	17.5218	54.8481	NA	3	0	3
ENSMUSG00000018293	3590	ENSMUST00000108549, ENSMUST00000018437	Pfn1	protein_coding	cds	GTC	AAT	chr11	-	321	60	-66	70652932	70652930	NA	NA	NA	10.3723	19.4553	13.2424	43.0699	NA	3	0	3
ENSMUSG00000018293	3597	ENSMUST00000018437, ENSMUST00000178254, ENSMUST00000108549	Pfn1	protein_coding, nonsense_mediated_decay	cds	ATG	GCG	chr11	-	174	11	-91.3333	70654448	70654446	NA	NA	NA	12.4524	14.6993	30.0678	57.2195	NA	3	0	3
ENSMUSG00000018339	3256	ENSMUST00000125094, ENSMUST00000082430, ENSMUST00000149324	Gpx3	protein_coding	cds	GGC	GAG	chr11	+	501	124.75	-89.75	54908626	54908628	NA	NA	NA	10.1657	60.7485	113.754	184.668	NA	3	0	3
ENSMUSG00000018583	3279	ENSMUST00000018727	G3bp1	protein_coding	cds	GAC	GAT	chr11	+	804	223	-242	55495385	55495387	NA	NA	NA	19.3258	21.8478	23.2448	64.4185	NA	3	0	3
ENSMUSG00000019179	17434	ENSMUST00000019323	Mdh2	protein_coding	cds	CTG	ACG	chr5	+	625	123	-215	135785978	135785980	NA	NA	NA	23.1179	25.318	14.3434	62.7793	NA	3	0	3
ENSMUSG00000019432	10559	ENSMUST00000068056, ENSMUST00000173731, ENSMUST00000172549	Ddx39b	protein_coding	cds	ATG	GAG	chr17	+	1371.33	246	-182	35251249	35251251	NA	NA	NA	10.6667	19.1721	21.3285	51.1672	NA	3	0	3
ENSMUSG00000019505	3360	ENSMUST00000019649, ENSMUST00000136938	Ubb	protein_coding	cds	CCC	CCT	chr11	+	414.5	36	-234	62552253	62552255	NA	NA	NA	10.7684	22.1463	21.9073	54.822	NA	3	0	3
ENSMUSG00000019505	3372	ENSMUST00000019649, ENSMUST00000136938	Ubb	protein_coding	cds	CCC	CCT	chr11	+	642.5	112	-158	62552481	62552483	NA	NA	NA	10.6051	23.7747	21.9092	56.289	NA	3	0	3
ENSMUSG00000019505	3394	ENSMUST00000019649	Ubb	protein_coding	cds	CCC	CCT	chr11	+	1223	264	-41	62552937	62552939	NA	NA	NA	10.264	27.0987	20.003	57.3656	NA	3	0	3
ENSMUSG00000019814	1323	ENSMUST00000019950	Ltv1	protein_coding	cds	GAT	GAG	chr10	-	1107	323	-147	13180043	13180041	NA	NA	NA	14.2009	24.6973	10.3448	49.243	NA	3	0	3
ENSMUSG00000019818	1385	ENSMUST00000186388	Cd164	nonsense_mediated_decay	cds	ATG	AAC	chr10	+	452	40.5	-3	41523193	41523195	NA	NA	NA	10.5647	14.8474	10.7013	36.1134	NA	3	0	3
ENSMUSG00000019942	1507	ENSMUST00000020099, ENSMUST00000119827	Cdk1	protein_coding	cds	CAC	CCG	chr10	-	1006	282.333	-14.3333	69338543	69338541	NA	NA	NA	15.4084	11.5	37.4282	64.3366	NA	3	0	3
ENSMUSG00000019961	2094	ENSMUST00000072239	Tmpo	protein_coding	cds	GAC	TTC	chr10	-	458	63	-389	91171125	91171123	NA	NA	NA	14.7406	10.5958	11.0935	36.4299	NA	3	0	3
ENSMUSG00000019961	2095	ENSMUST00000092219	Tmpo	protein_coding	cds	GAC	TTC	chr10	-	444	63	-349	91171139	91171137	NA	NA	NA	14.7406	10.8544	11.1258	36.7208	NA	3	0	3
ENSMUSG00000019961	2096	ENSMUST00000099355, ENSMUST00000105293	Tmpo	protein_coding	cds	GAC	TTC	chr10	-	428	63	-298.5	91171155	91171153	NA	NA	NA	14.7406	10.9013	11.4095	37.0515	NA	3	0	3
ENSMUSG00000019998	1353	ENSMUST00000020174	Stx7	protein_coding	cds	TCT	AAC	chr10	+	532	18.5	-242	24155356	24155358	NA	NA	NA	15.1667	16.0436	30.5531	61.7634	NA	3	0	3
ENSMUSG00000020018	2104	ENSMUST00000020203	Snrpf	protein_coding	cds	GAA	GAA	chr10	-	390	75	-11	93583500	93583498	NA	NA	NA	13.7494	36	39.3415	89.0909	NA	3	0	3
ENSMUSG00000020089	1459	ENSMUST00000020286	Ppa1	protein_coding	cds	CCA	ATT	chr10	+	281	35	-254	61651600	61651602	NA	NA	NA	12.549	15.8863	26.1585	54.5938	NA	3	0	3
ENSMUSG00000020089	1465	ENSMUST00000020286	Ppa1	protein_coding	cds	GAT	GGA	chr10	+	764	196	-93	61666987	61666989	NA	NA	NA	11.4879	22.2503	24.0079	57.7461	NA	3	0	3
ENSMUSG00000020149	2753	ENSMUST00000020358, ENSMUST00000109601, ENSMUST00000163483	Rab1a	protein_coding	cds	GAT	TTC	chr11	+	277	44	-133.667	20218854	20218856	NA	NA	NA	10.2166	21.3619	13.5779	45.1564	NA	3	0	3
ENSMUSG00000020152	2747	ENSMUST00000000137	Actr2	protein_coding	cds	TCT	GAA	chr11	-	943	294	-100	20072588	20072586	NA	NA	NA	10.4564	14.4591	29.887	54.8025	NA	3	0	3
ENSMUSG00000020186	2154	ENSMUST00000020403	Csrp2	protein_coding	cds	CAT	GAT	chr10	+	620	50	-142	110939246	110939248	NA	NA	NA	10.9096	18.563	10.3383	39.8109	NA	3	0	3
ENSMUSG00000020211	1807	ENSMUST00000151928	Sf3a2	protein_coding	cds	CCT	GGG	chr10	+	453	113.5	-80	80802888	80802890	NA	NA	NA	12.415	11.5579	12.7248	36.6978	NA	3	0	3
ENSMUSG00000020267	3241	ENSMUST00000020504, ENSMUST00000117710	Hint1	protein_coding	cds	GCA	CCA	chr11	+	199	47	-75.5	54869877	54869879	NA	NA	NA	13.1692	12.593	22.0818	47.8439	NA	3	0	3
ENSMUSG00000020277	1600	ENSMUST00000020522	Pfkl	protein_coding	cds	TTC	AAC	chr10	-	1918	597.5	-182	77990163	77990161	NA	NA	NA	16.9434	11.8323	16.5421	45.3179	NA	3	0	3
ENSMUSG00000020277	1608	ENSMUST00000020522	Pfkl	protein_coding	cds	GGA	AAG	chr10	-	934	269.5	-510	77997557	77997555	NA	NA	NA	11.5252	10.961	12.1534	34.6396	NA	3	0	3
ENSMUSG00000020349	3165	ENSMUST00000020608	Ppp2ca	protein_coding	cds	GAC	GAC	chr11	+	1202	278	-31	52121028	52121030	NA	NA	NA	10.2562	15.2343	11.6145	37.105	NA	3	0	3
ENSMUSG00000020402	3205	ENSMUST00000102758, ENSMUST00000125694, ENSMUST00000020673	Vdac1	protein_coding, nonsense_mediated_decay	cds	ATC	AAG	chr11	+	457.667	117.333	-160.333	52383865	52383867	NA	NA	NA	15.2873	32.1172	34.2189	81.6234	NA	3	0	3
ENSMUSG00000020440	17904	ENSMUST00000020717, ENSMUST00000169841	Arf5	protein_coding	cds	GGA	GGC	chr6	+	287	68	-112	28424777	28424779	NA	NA	NA	17.9815	23.4743	45.2562	86.7121	NA	3	0	3
ENSMUSG00000020460	2848	ENSMUST00000102845, ENSMUST00000102844	Rps27a	protein_coding	cds	CTT	CGT	chr11	-	557	116	-40	29546003	29546001	NA	NA	NA	11.3729	34.8626	26.9635	73.199	NA	3	0	3
ENSMUSG00000020485	3983	ENSMUST00000093955	Supt4a	protein_coding	cds	GGT	GTA	chr11	+	294	81.5	-35	87743071	87743073	NA	NA	NA	10.3994	12.1993	10.2502	32.8488	NA	3	0	3
ENSMUSG00000020485	3984	ENSMUST00000152700, ENSMUST00000141169	Supt4a	nonsense_mediated_decay	3utr	NA	NA	chr11	+	409.5	361	72.5	87743072	87743074	NA	NA	NA	15.5885	12.4502	10.9824	39.021	NA	3	0	3
ENSMUSG00000020571	5135	ENSMUST00000057288	Pdia6	protein_coding	cds	TGT	GGA	chr12	+	655	194	-251	17278627	17278629	NA	NA	NA	12.3492	21.795	23.8191	57.9633	NA	3	0	3
ENSMUSG00000020571	5142	ENSMUST00000057288	Pdia6	protein_coding	cds	CTT	CTG	chr12	+	1045	324	-121	17280598	17280600	NA	NA	NA	10.4228	22.7996	13.1747	46.3971	NA	3	0	3
ENSMUSG00000020609	4957	ENSMUST00000037811	Apob	protein_coding	cds	TGT	CCA	chr12	+	245	37.3333	-4467.33	7978244	7978246	NA	NA	NA	13.3445	14.35	22.274	49.9686	NA	3	0	3
ENSMUSG00000020609	5001	ENSMUST00000037811, ENSMUST00000037520	Apob	protein_coding	cds	GGT	GTT	chr12	+	6034	1989.5	-2490.5	8007537	8007539	NA	NA	NA	11.8095	50.1034	26.8224	88.7353	NA	3	0	3
ENSMUSG00000020719	4463	ENSMUST00000133426, ENSMUST00000127481	Ddx5	nonsense_mediated_decay	3utr	NA	NA	chr11	-	1849	1673	955.5	106782149	106782147	NA	NA	NA	13.3012	30.2325	12.5287	56.0625	NA	3	0	3
ENSMUSG00000020719	4474	ENSMUST00000133426, ENSMUST00000127481	Ddx5	nonsense_mediated_decay	3utr	NA	NA	chr11	-	1558	1382	664.5	106782652	106782650	NA	NA	NA	17.9275	17.2219	24.2685	59.4178	NA	3	0	3
ENSMUSG00000020719	4497	ENSMUST00000133426, ENSMUST00000127481, ENSMUST00000021062, ENSMUST00000129585, ENSMUST00000123339	Ddx5	nonsense_mediated_decay, protein_coding	cds	GAC	CGC	chr11	-	265.4	7.5	-280.2	106788293	106788291	NA	NA	NA	20.4841	11.55	10.9278	42.962	NA	3	0	3
ENSMUSG00000020733	4572	ENSMUST00000021077	Slc9a3r1	protein_coding	cds	GAC	TCA	chr11	+	722	178.5	-176	115176461	115176463	NA	NA	NA	10.3848	34.2175	34.7336	79.3358	NA	3	0	3
ENSMUSG00000020737	4595	ENSMUST00000021083	Jpt1	protein_coding	cds	GCT	CCT	chr11	-	490	126	-28	115498238	115498236	NA	NA	NA	15.2104	13.6347	35.2898	64.1349	NA	3	0	3
ENSMUSG00000020737	4596	ENSMUST00000021083	Jpt1	protein_coding	cds	GGA	ACA	chr11	-	352	80	-74	115502062	115502060	NA	NA	NA	10.0528	26.8267	18.5	55.3795	NA	3	0	3
ENSMUSG00000020739	4616	ENSMUST00000021085	Nup85	protein_coding	cds	ATG	GAA	chr11	+	432	111.5	-544	115568408	115568410	NA	NA	NA	16.3454	22.954	47.8914	87.1908	NA	3	0	3
ENSMUSG00000020780	4659	ENSMUST00000021133, ENSMUST00000106425	Srp68	protein_coding	cds	AAC	GAC	chr11	-	1615	514.5	-91	116246268	116246266	NA	NA	NA	12.029	15.2998	43.4521	70.7808	NA	3	0	3
ENSMUSG00000020794	3650	ENSMUST00000021148	Ube2g1	protein_coding	cds	CCA	GAT	chr11	+	442	45	-125	72663159	72663161	NA	NA	NA	16.2491	12.9563	17.8897	47.0951	NA	3	0	3
ENSMUSG00000020794	3651	ENSMUST00000138247	Ube2g1	protein_coding	5utr	NA	NA	chr11	+	559	-78	-377	72663160	72663162	NA	NA	NA	16.7432	11.7851	12	40.5283	NA	3	0	3
ENSMUSG00000020840	3764	ENSMUST00000140781, ENSMUST00000021197, ENSMUST00000155053, ENSMUST00000146197	Blmh	protein_coding	cds	GTT	GAA	chr11	+	521.5	77.25	-134.25	76950069	76951045	NA	NA	NA	10.9926	16.1511	18.993	46.1367	NA	3	0	3
ENSMUSG00000020849	3738	ENSMUST00000067664	Ywhae	protein_coding	cds	GAT	GAC	chr11	+	756	198.5	-56	75759310	75759312	NA	NA	NA	10.1491	27.7211	21.3564	59.2266	NA	3	0	3
ENSMUSG00000020850	3688	ENSMUST00000018449, ENSMUST00000102510, ENSMUST00000131283	Prpf8	protein_coding	cds	CCC	AAA	chr11	+	1532	444.667	-1460	75491858	75491860	NA	NA	NA	16.3705	11.1438	11.6258	39.14	NA	3	0	3
ENSMUSG00000020850	3696	ENSMUST00000018449, ENSMUST00000102510	Prpf8	protein_coding	cds	GGC	ATT	chr11	+	4420.5	1413	-921	75500551	75500553	NA	NA	NA	17.2997	19.1041	16.573	52.9768	NA	3	0	3
ENSMUSG00000020850	3702	ENSMUST00000018449, ENSMUST00000102510	Prpf8	protein_coding	cds	ACT	GAG	chr11	+	5452.5	1758	-577	75503406	75503408	NA	NA	NA	19.5992	23.4961	13.4263	56.5216	NA	3	0	3
ENSMUSG00000020929	4397	ENSMUST00000021306, ENSMUST00000173679, ENSMUST00000107060	Eftud2	protein_coding	cds	CTT	GGC	chr11	-	1240.33	394.333	-574	102851848	102851846	NA	NA	NA	10.0925	15.9795	26.9054	52.9773	NA	3	0	3
ENSMUSG00000020949	5361	ENSMUST00000021332	Fkbp3	protein_coding	cds	GGA	GAA	chr12	-	637	184	-40	65063683	65063681	NA	NA	NA	11.8392	30.9213	17.9764	60.7369	NA	3	0	3
ENSMUSG00000021039	5579	ENSMUST00000021428	Snw1	protein_coding	cds	TTG	GAA	chr12	-	1525	503.5	-32	87450642	87450640	NA	NA	NA	10.6556	33.9493	18.7249	63.3299	NA	3	0	3
ENSMUSG00000021109	5430	ENSMUST00000110461, ENSMUST00000021530	Hif1a	protein_coding	cds	CCG	GAA	chr12	+	1035.5	259.5	-563.5	73936214	73936216	NA	NA	NA	10.6556	16.9241	33.1257	60.7054	NA	3	0	3
ENSMUSG00000021109	5438	ENSMUST00000110461, ENSMUST00000021530	Hif1a	protein_coding	cds	GGT	GAC	chr12	+	2469.5	738	-85	73944931	73944933	NA	NA	NA	15.2446	20.8781	10.6839	46.8065	NA	3	0	3
ENSMUSG00000021116	5477	ENSMUST00000071230	Eif2s1	protein_coding	cds	TCA	GAC	chr12	+	834	157	-158	78877241	78877243	NA	NA	NA	32.8714	52.5876	58.6148	144.074	NA	3	0	3
ENSMUSG00000021134	5526	ENSMUST00000110354, ENSMUST00000110352, ENSMUST00000110351, ENSMUST00000110356, ENSMUST00000094693	Srsf5	protein_coding	cds	AGC	CGA	chr12	+	778.8	200.4	-69	80949768	80949770	NA	NA	NA	25.9169	11.434	12.9804	50.3314	NA	3	0	3
ENSMUSG00000021178	5590	ENSMUST00000021595	Psmc1	protein_coding	cds	CAC	GCC	chr12	+	412	119	-321	100115529	100115531	NA	NA	NA	15.4498	10.4524	18.8171	44.7193	NA	3	0	3
ENSMUSG00000021270	5718	ENSMUST00000094361, ENSMUST00000021698	Hsp90aa1	protein_coding	cds	GGC	TAT	chr12	-	783	213.5	-519.5	110694592	110694590	NA	NA	NA	12.7735	24.3869	11.2943	48.4548	NA	3	0	3
ENSMUSG00000021270	5722	ENSMUST00000094361, ENSMUST00000021698, ENSMUST00000155242	Hsp90aa1	protein_coding	cds	ATG	GGT	chr12	-	666.333	179	-376.667	110694697	110694695	NA	NA	NA	13.7533	25.2186	17.3599	56.3317	NA	3	0	3
ENSMUSG00000021477	6931	ENSMUST00000021933	Ctsl	protein_coding	cds	TAT	CCT	chr13	-	1069	328.5	-5	64364116	64364114	NA	NA	NA	11.3335	33.5537	27.7376	72.6248	NA	3	0	3
ENSMUSG00000021595	6969	ENSMUST00000109699, ENSMUST00000176485, ENSMUST00000022087	Nsun2	protein_coding	cds	ACG	GAC	chr13	+	1177.33	361.333	-362	69627125	69627127	NA	NA	NA	16.9454	20.3977	18.9167	56.2598	NA	3	0	3
ENSMUSG00000021606	6985	ENSMUST00000022097	Ndufs6	protein_coding	cds	CAG	AAA	chr13	-	249	51	-65	73327425	73327423	NA	NA	NA	10.244	17.8923	24.6309	52.7672	NA	3	0	3
ENSMUSG00000021660	7112	ENSMUST00000022163, ENSMUST00000152704, ENSMUST00000134542	Btf3	protein_coding	cds	TTT	AAC	chr13	-	406.333	87	-89	98313258	98313256	NA	NA	NA	12.1779	27.508	19.8601	59.5461	NA	3	0	3
ENSMUSG00000021728	7228	ENSMUST00000022242	Emb	protein_coding	cds	AAT	ACA	chr13	+	928	117	-213	117267417	117267419	NA	NA	NA	10.2562	16.0671	22.2686	48.5919	NA	3	0	3
ENSMUSG00000021771	7406	ENSMUST00000022293, ENSMUST00000153320, ENSMUST00000173456, ENSMUST00000172727	Vdac2	protein_coding	cds	ATC	AAG	chr14	+	671	118.5	-146.75	21838406	21838408	NA	NA	NA	10.6602	33.5976	31.6429	75.9007	NA	3	0	3
ENSMUSG00000021794	7566	ENSMUST00000022322	Glud1	protein_coding	cds	GTC	AAA	chr14	+	1356	394.5	-163	34336218	34336220	NA	NA	NA	10.9704	11.244	22.1996	44.4139	NA	3	0	3
ENSMUSG00000021824	7389	ENSMUST00000126536	Ap3m1	nonsense_mediated_decay	3utr	NA	NA	chr14	-	636	584	240	21039174	21039172	NA	NA	NA	13.0769	16.8045	16.2256	46.1069	NA	3	0	3
ENSMUSG00000021824	7390	ENSMUST00000154460, ENSMUST00000022371	Ap3m1	protein_coding	cds	CCA	GAT	chr14	-	875	224.5	-166	21039175	21039173	NA	NA	NA	15.5448	18.0212	16.8842	50.4502	NA	3	0	3
ENSMUSG00000021832	7606	ENSMUST00000022380	Psmc6	protein_coding	cds	TCA	GAA	chr14	+	474	138	-251	45337486	45337488	NA	NA	NA	14.3354	26.0385	22.2003	62.5743	NA	3	0	3
ENSMUSG00000021910	7512	ENSMUST00000168206, ENSMUST00000022469	Nisch	protein_coding	cds	CCC	GAG	chr14	-	1447.5	408.5	-1062	31180888	31180886	NA	NA	NA	12.5451	11.5579	14.9671	39.0701	NA	3	0	3
ENSMUSG00000021910	7515	ENSMUST00000022469, ENSMUST00000165981, ENSMUST00000168206, ENSMUST00000172142, ENSMUST00000164989	Nisch	protein_coding, nonsense_mediated_decay	cds	GAC	GAA	chr14	-	901.8	255	-597.6	31188651	31188649	NA	NA	NA	10.709	14.7029	10.4468	35.8588	NA	3	0	3
ENSMUSG00000022314	8272	ENSMUST00000022927	Rad21	protein_coding	cds	TGT	CGA	chr15	-	1996	587.5	-47	51964213	51964211	NA	NA	NA	13.9219	12.3183	12.4625	38.7027	NA	3	0	3
ENSMUSG00000022336	8257	ENSMUST00000022960	Eif3e	protein_coding	cds	CTG	GCA	chr15	-	375	116	-329	43272311	43272309	NA	NA	NA	15.224	25.5606	24.0548	64.8395	NA	3	0	3
ENSMUSG00000022391	8624	ENSMUST00000170134, ENSMUST00000052374	Rangap1	protein_coding	cds	GAC, CCC	CCA, ACA	chr15	-	1647	448.5	-140	81709493	81709491	NA	NA	NA	15.4057	18.5062	10.6667	44.5786	NA	3	0	3
ENSMUSG00000022443	8406	ENSMUST00000016771	Myh9	protein_coding	cds	AAC	TCC	chr15	-	1621	461	-1499	77786658	77786656	NA	NA	NA	14.3604	12.312	10.7795	37.452	NA	3	0	3
ENSMUSG00000022462	8760	ENSMUST00000023099	Slc38a2	protein_coding	cds	GAT	GAG	chr15	-	449	12.5	-491	96698660	96698658	NA	NA	NA	11.6691	10.9592	18.2185	40.8469	NA	3	0	3
ENSMUSG00000022477	8654	ENSMUST00000023116	Aco2	protein_coding	cds	CCA	GGG	chr15	+	1818	538	-242	81912214	81912216	NA	NA	NA	12.617	28.5574	27.1874	68.3618	NA	3	0	3
ENSMUSG00000022536	9215	ENSMUST00000023189	Glyr1	protein_coding	cds	GGC	AAT	chr16	-	1289	423	-123	5019326	5019324	NA	NA	NA	12.1221	42.6843	15.305	70.1113	NA	3	0	3
ENSMUSG00000022536	9216	ENSMUST00000115844	Glyr1	protein_coding	cds	GGC	AAT	chr16	-	1301	429	-123	5019332	5019330	NA	NA	NA	12.1221	42.3693	15.44	69.9314	NA	3	0	3
ENSMUSG00000022757	9579	ENSMUST00000127994	Tfg	protein_coding	cds	TAG	AAC	chr16	-	183	60.5	-159	56704475	56704473	NA	NA	NA	12.9692	24.7487	22.8776	60.5956	NA	3	0	3
ENSMUSG00000022797	9462	ENSMUST00000023486	Tfrc	protein_coding	cds	AAT	GAA	chr16	+	2327	729	-34	32630231	32630233	NA	NA	NA	11.2543	10.5368	17.6246	39.4158	NA	3	0	3
ENSMUSG00000022800	9466	ENSMUST00000171325	Fyttd1	protein_coding	cds	CCT	CTA	chr16	+	471	122	-161	32891393	32891395	NA	NA	NA	10.6066	17.9353	20.4315	48.9734	NA	3	0	3
ENSMUSG00000022800	9467	ENSMUST00000023489	Fyttd1	protein_coding	cds	CCT	CTA	chr16	+	479	122	-195	32891398	32891400	NA	NA	NA	10.6066	17.9353	20.4315	48.9734	NA	3	0	3
ENSMUSG00000022962	9712	ENSMUST00000156713	Gart	nonsense_mediated_decay	3utr	NA	NA	chr16	-	1790	1744	824	91628635	91628633	NA	NA	NA	14.1353	31.657	31	76.7923	NA	3	0	3
ENSMUSG00000023004	8798	ENSMUST00000077577	Tuba1b	protein_coding	cds	ATC	TCT	chr15	-	1055	275	-176	98932113	98932111	NA	NA	NA	13.4423	11.5714	12.0053	37.0191	NA	3	0	3
ENSMUSG00000023004	8799	ENSMUST00000077577	Tuba1b	protein_coding	cds	GTC	ATC	chr15	-	1052	273.5	-177.5	98932116	98932114	NA	NA	NA	20.0103	10.2482	10.5903	40.8488	NA	3	0	3
ENSMUSG00000023004	8829	ENSMUST00000077577	Tuba1b	protein_coding	cds	GAG	GAT	chr15	-	518	95.5	-355.5	98932779	98932777	NA	NA	NA	11.3236	23.8466	20.8089	55.9791	NA	3	0	3
ENSMUSG00000023175	1640	ENSMUST00000179781, ENSMUST00000067036, ENSMUST00000105381	Bsg	protein_coding	cds	GAT	GAC	chr10	+	367	98.3333	-195	79710067	79710069	NA	NA	NA	12.9984	39.7606	14.2062	66.9653	NA	3	0	3
ENSMUSG00000023175	1641	ENSMUST00000178383	Bsg	protein_coding	cds	ATG	ACC	chr10	+	183	60.5	-136	79710068	79710070	NA	NA	NA	13.4292	40.2865	14.2062	67.9219	NA	3	0	3
ENSMUSG00000023175	1656	ENSMUST00000179781, ENSMUST00000067036, ENSMUST00000105381	Bsg	protein_coding	cds	GGC	ACC	chr10	+	685	204.333	-89	79710739	79710741	NA	NA	NA	10.0231	17.1422	15.4528	42.6182	NA	3	0	3
ENSMUSG00000023944	10667	ENSMUST00000024739	Hsp90ab1	protein_coding	cds	CAC	CCC	chr17	-	1998	631	-93	45568401	45568399	NA	NA	NA	12.3205	13.5408	25.4565	51.3177	NA	3	0	3
ENSMUSG00000023944	10712	ENSMUST00000163966	Hsp90ab1	nonsense_mediated_decay	3utr	NA	NA	chr17	-	659	569	231	45570707	45570705	NA	NA	NA	11.8017	45.2785	27.1021	84.1823	NA	3	0	3
ENSMUSG00000023944	10717	ENSMUST00000024739	Hsp90ab1	protein_coding	cds	CTT	CAC	chr17	-	651	182	-542	45570768	45570766	NA	NA	NA	15.2893	18.2633	12.3129	45.8655	NA	3	0	3
ENSMUSG00000023944	10746	ENSMUST00000163966, ENSMUST00000024739	Hsp90ab1	nonsense_mediated_decay, protein_coding	cds	CCC	AAC	chr17	-	325	76	-342	45571539	45571537	NA	NA	NA	13.8399	26.4574	15.8737	56.1711	NA	3	0	3
ENSMUSG00000024026	10302	ENSMUST00000024823	Glo1	nonsense_mediated_decay	3utr	NA	NA	chr17	-	742	680	351	30594059	30594057	NA	NA	NA	18.3042	38.644	38.2134	95.1616	NA	3	0	3
ENSMUSG00000024048	10941	ENSMUST00000024846, ENSMUST00000150456, ENSMUST00000148960, ENSMUST00000123686	Myl12a	protein_coding	cds	CTG	GAC	chr17	-	515.667	68.6667	-92	70996249	70996247	NA	NA	NA	14.7491	12.8118	19.5975	47.1584	NA	3	0	3
ENSMUSG00000024048	10942	ENSMUST00000150456, ENSMUST00000128179, ENSMUST00000148960, ENSMUST00000024846, ENSMUST00000123686	Myl12a	protein_coding	cds	AAA	GAA	chr17	-	412.857	33.5714	-96.1429	70996779	70996777	NA	NA	NA	10.7889	10.604	13.5277	34.9207	NA	3	0	3
ENSMUSG00000024091	10918	ENSMUST00000024897	Vapa	protein_coding	cds	CCA	AAC	chr17	-	566	103	-146	65593467	65593465	NA	NA	NA	21.0016	12.068	11.391	44.4605	NA	3	0	3
ENSMUSG00000024208	10080	ENSMUST00000025045, ENSMUST00000118613, ENSMUST00000119227	Uqcc2	protein_coding	cds	GAA	GAG	chr17	-	294	81	-39	27122833	27122831	NA	NA	NA	12.0748	10.0021	14.161	36.2379	NA	3	0	3
ENSMUSG00000024248	10980	ENSMUST00000025095, ENSMUST00000167741	Cox7a2l	protein_coding	cds	CCT	ATC	chr17	-	157	33	-88.5	83504202	83504200	NA	NA	NA	14.1349	21.6459	41.0036	76.7844	NA	3	0	3
ENSMUSG00000024271	11112	ENSMUST00000025120	Elp2	protein_coding	cds	GAT	GAC	chr18	+	1634	534	-207	24626187	24626189	NA	NA	NA	13.5974	24.2214	44.168	81.9868	NA	3	0	3
ENSMUSG00000024360	11165	ENSMUST00000025218	Etf1	protein_coding	cds	CAG	GAA	chr18	-	1281	363	-74	34906124	34906122	NA	NA	NA	10.2062	12.1447	11.2802	33.6312	NA	3	0	3
ENSMUSG00000024360	11169	ENSMUST00000025218	Etf1	protein_coding	5utr	NA	NA	chr18	-	48	-145	-1458	34931960	34931958	NA	NA	NA	10.1858	17.617	11.2867	39.0894	NA	3	0	3
ENSMUSG00000024391	10540	ENSMUST00000025249	Apom	protein_coding	cds	GAT	CCG	chr17	-	516	63	-127	35131275	35131273	NA	NA	NA	10.3637	25.6148	33.8293	69.8077	NA	3	0	3
ENSMUSG00000024583	11447	ENSMUST00000025476	Txnl1	protein_coding	cds	AAG	CTT	chr18	-	674	174.333	-117.333	63676883	63676881	NA	NA	NA	20.0925	27.5894	15.9377	63.6196	NA	3	0	3
ENSMUSG00000024640	12074	ENSMUST00000025542, ENSMUST00000162053, ENSMUST00000162416	Psat1	protein_coding	cds	CCT	GAC	chr19	-	624.333	150.333	-147.333	15917152	15917150	NA	NA	NA	13.6418	16.3391	23.6174	53.5983	NA	3	0	3
ENSMUSG00000024661	11991	ENSMUST00000025563	Fth1	protein_coding	cds	CTG	GGT	chr19	+	668	147.5	-34	9984894	9984896	NA	NA	NA	15.1217	23.1854	30.5183	68.8254	NA	3	0	3
ENSMUSG00000024661	11992	ENSMUST00000025563	Fth1	protein_coding	cds	GGT	GAC	chr19	+	671	148.5	-33.5	9984897	9984899	NA	NA	NA	14.4575	42.498	26.25	83.2054	NA	3	0	3
ENSMUSG00000024767	11835	ENSMUST00000025679, ENSMUST00000123594	Otub1	protein_coding	cds	ACT	GAA	chr19	-	458.5	114.5	-141	7199696	7199694	NA	NA	NA	12.4728	31.4986	40.8811	84.8525	NA	3	0	3
ENSMUSG00000024767	11836	ENSMUST00000025679, ENSMUST00000123594, ENSMUST00000142085	Otub1	protein_coding	cds	CAC	CTG	chr19	-	366.333	78.5	-123	7199984	7199982	NA	NA	NA	14.8095	14.8429	11.5245	41.177	NA	3	0	3
ENSMUSG00000024990	12173	ENSMUST00000025951, ENSMUST00000112335	Rbp4	protein_coding	cds	TAC, GAA	GAC, GAT	chr19	-	539.5	135	-88	38124073	38124071	NA	NA	NA	10.2305	20.3514	13.6995	44.2814	NA	3	0	3
ENSMUSG00000024991	12373	ENSMUST00000025955	Eif3a	protein_coding	cds	GAG	GAA	chr19	-	2268	713.5	-630	60771748	60771746	NA	NA	NA	10.699	14	24.2214	48.9205	NA	3	0	3
ENSMUSG00000025130	4846	ENSMUST00000026122	P4hb	protein_coding	cds	GTT	GAA	chr11	-	1619	391	-118	120562665	120562663	NA	NA	NA	13.5262	21.0668	16.4136	51.0066	NA	3	0	3
ENSMUSG00000025130	4850	ENSMUST00000026122	P4hb	protein_coding	cds	ATC	AAG	chr11	-	1502	352	-157	120563211	120563209	NA	NA	NA	11.7201	24.5545	23.2493	59.5239	NA	3	0	3
ENSMUSG00000025134	4889	ENSMUST00000026125	Alyref	protein_coding	cds	GAC	AAA	chr11	-	276	83	-172	120597752	120597750	NA	NA	NA	12.4088	23.5514	12.413	48.3732	NA	3	0	3
ENSMUSG00000025151	23935	ENSMUST00000026142	Maged1	protein_coding	cds	CCC	ATC	chrX	-	1742	486.5	-288	94538461	94538459	NA	NA	NA	15.6568	13.0398	16.1053	44.8018	NA	3	0	3
ENSMUSG00000025203	12261	ENSMUST00000026221	Scd2	protein_coding	cds	CCT	TCT	chr19	+	780	22	-336	44294947	44294949	NA	NA	NA	17.4009	26.8175	33.5	77.7184	NA	3	0	3
ENSMUSG00000025290	7434	ENSMUST00000169826	Rps24	protein_coding	cds	TTA	GAT	chr14	+	272	78	-52	24492034	24492036	NA	NA	NA	15.8241	35.4637	18.9407	70.2285	NA	3	0	3
ENSMUSG00000025290	7440	ENSMUST00000112384	Rps24	protein_coding	cds	TTA	GAT	chr14	+	309	78	-52	24492071	24492073	NA	NA	NA	15.8241	35.4637	18.9407	70.2285	NA	3	0	3
ENSMUSG00000025351	2522	ENSMUST00000105229	Cd63	protein_coding	cds	ACT	ACT	chr10	+	382	46	-192	128911622	128911624	NA	NA	NA	10.6905	17.7189	12.8555	41.2649	NA	3	0	3
ENSMUSG00000025351	2525	ENSMUST00000026407	Cd63	protein_coding	cds	ACT	ACT	chr10	+	409	46	-192	128911844	128911846	NA	NA	NA	10.6905	17.7189	12.8555	41.2649	NA	3	0	3
ENSMUSG00000025364	2464	ENSMUST00000026425	Pa2g4	protein_coding	cds	TTT	GAG	chr10	-	1118	337	-57	128559284	128559282	NA	NA	NA	12.0294	16.6138	10.9047	39.5478	NA	3	0	3
ENSMUSG00000025393	2425	ENSMUST00000026459	Atp5b	protein_coding	cds	ATT	GAA	chr10	+	1590	512	-17	128090065	128090067	NA	NA	NA	15.2407	23.1017	16.1209	54.4633	NA	3	0	3
ENSMUSG00000025395	2315	ENSMUST00000026461, ENSMUST00000178041	Prim1	protein_coding	cds	ATC	GAT	chr10	+	1076.5	332	-85.5	128026534	128026536	NA	NA	NA	12.8749	12.7686	15.6773	41.3208	NA	3	0	3
ENSMUSG00000025403	2308	ENSMUST00000026470	Shmt2	protein_coding	cds	TTC	GAG	chr10	-	691	188	-315	127519657	127519655	NA	NA	NA	10.2247	19.9614	10.2673	40.4535	NA	3	0	3
ENSMUSG00000025428	11534	ENSMUST00000026495, ENSMUST00000114748	Atp5a1	protein_coding	cds	TCT	GAC	chr18	+	1262	254	-274	77779864	77779866	NA	NA	NA	23.9607	23.7918	13.5423	61.2949	NA	3	0	3
ENSMUSG00000025503	20726	ENSMUST00000026576	Taldo1	protein_coding	cds	CGG	ATG	chr7	+	992	323	-14	141402317	141402319	NA	NA	NA	10.4084	24.719	15.7532	50.8806	NA	3	0	3
ENSMUSG00000025544	8005	ENSMUST00000026624, ENSMUST00000171318	Tm9sf2	protein_coding	cds	AAT	CGA	chr14	+	1046.5	310.5	-269	122146696	122146698	NA	NA	NA	12.1354	14.2987	11.3554	37.7894	NA	3	0	3
ENSMUSG00000025613	9636	ENSMUST00000026704, ENSMUST00000175977, ENSMUST00000175750	Cct8	protein_coding	cds	GAT, GGA	AAG, TAA	chr16	-	939.333	303.667	-121.333	87485905	87486236	NA	NA	NA	15.6867	10.4937	10.3139	36.4944	NA	3	0	3
ENSMUSG00000025613	9681	ENSMUST00000026704, ENSMUST00000176041, ENSMUST00000176750	Cct8	protein_coding	cds	GAA	ATA	chr16	-	439.667	96	-183	87490651	87490649	NA	NA	NA	10.9284	30.2562	22.5908	63.7754	NA	3	0	3
ENSMUSG00000025794	23192	ENSMUST00000165532	Rpl14	protein_coding	cds	GAC	TTC	chr9	+	269	58	-159	120573622	120573624	NA	NA	NA	13.8113	12.0026	10.048	35.862	NA	3	0	3
ENSMUSG00000025794	23202	ENSMUST00000165532	Rpl14	protein_coding	cds	GAA	AGG	chr9	+	389	97.5	-119.5	120574107	120574109	NA	NA	NA	19.8723	46.4286	41.1649	107.466	NA	3	0	3
ENSMUSG00000025809	21730	ENSMUST00000124826	Itgb1	nonsense_mediated_decay	3utr	NA	NA	chr8	+	1103	899	723	128717669	128717671	NA	NA	NA	10.9697	20.1648	19.799	50.9335	NA	3	0	3
ENSMUSG00000025823	18075	ENSMUST00000077290	Pdia4	protein_coding	cds	GTC	AGA	chr6	-	603	159	-482	47807074	47807072	NA	NA	NA	10.3889	23.9574	20.7307	55.0771	NA	3	0	3
ENSMUSG00000025968	364	ENSMUST00000027111, ENSMUST00000168099	Ndufs1	protein_coding	cds	GGA	GAC	chr1	-	1611	445	-282	63152832	63152830	NA	NA	NA	14.4413	18.8926	26.6522	59.9861	NA	3	0	3
ENSMUSG00000025980	269	ENSMUST00000027123	Hspd1	protein_coding	cds	CTT	GAA	chr1	-	1028	260	-313	55081749	55081747	NA	NA	NA	20.6485	41.4709	18.1025	80.2219	NA	3	0	3
ENSMUSG00000025980	288	ENSMUST00000027123, ENSMUST00000127861, ENSMUST00000144077	Hspd1	protein_coding	cds	GCT	CGA	chr1	-	307	35	-270	55086835	55086833	NA	NA	NA	30.1667	12.0166	13.1187	55.302	NA	3	0	3
ENSMUSG00000026020	349	ENSMUST00000027174, ENSMUST00000191142	Nop58	protein_coding	cds	GGT	GAA	chr1	+	1314	375	-115	59706686	59706688	NA	NA	NA	13.6503	33.6219	43.0714	90.3437	NA	3	0	3
ENSMUSG00000026174	536	ENSMUST00000087215	Cnot9	protein_coding	cds	TTC	ATA	chr1	+	929	182.5	-116	74527000	74527002	NA	NA	NA	12.1533	15.0662	19.3047	46.5242	NA	3	0	3
ENSMUSG00000026192	428	ENSMUST00000027384	Atic	protein_coding	cds	AAA	CTT	chr1	+	778	224	-368	71564951	71564953	NA	NA	NA	16.3299	15.2343	10.6556	42.2199	NA	3	0	3
ENSMUSG00000026192	437	ENSMUST00000027384	Atic	protein_coding	cds	TCT	GGA	chr1	+	1792	562	-30	71578578	71578580	NA	NA	NA	10.9697	18.5309	18.7338	48.2343	NA	3	0	3
ENSMUSG00000026229	588	ENSMUST00000027432	Psmd1	protein_coding	cds	GGT	GGT	chr1	+	2388	738	-214	86126557	86128136	NA	NA	NA	13.1288	26.0052	10.1463	49.2803	NA	3	0	3
ENSMUSG00000026229	589	ENSMUST00000139715	Psmd1	nonsense_mediated_decay	3utr	NA	NA	chr1	+	2219	2047	1901	86126558	86128137	NA	NA	NA	10.036	29.584	13.5729	53.1929	NA	3	0	3
ENSMUSG00000026234	622	ENSMUST00000027438	Ncl	protein_coding	cds	GAT	GCA	chr1	-	1503	442	-265	86353250	86353248	NA	NA	NA	12.5443	28.2843	34.9149	75.7434	NA	3	0	3
ENSMUSG00000026234	627	ENSMUST00000027438	Ncl	protein_coding	cds	TTT	GAA	chr1	-	1419	414	-293	86353785	86353783	NA	NA	NA	22.5216	32.4048	26.6963	81.6226	NA	3	0	3
ENSMUSG00000026234	635	ENSMUST00000027438	Ncl	protein_coding	cds	AGT	GAA	chr1	-	1164	329	-378	86356111	86356109	NA	NA	NA	16.1322	28.8337	26.0462	71.0121	NA	3	0	3
ENSMUSG00000026238	663	ENSMUST00000045897, ENSMUST00000186255, ENSMUST00000188533	Ptma	protein_coding	cds	AAG	GAG	chr1	+	200.667	17	-72	86529178	86529180	NA	NA	NA	11.1692	18.1505	10.5084	39.8282	NA	3	0	3
ENSMUSG00000026245	551	ENSMUST00000170217, ENSMUST00000068333, ENSMUST00000188247, ENSMUST00000190441	Farsb	protein_coding	cds	ATT	GAA	chr1	-	450	122.5	-282.25	78476228	78476226	NA	NA	NA	11.3196	18.4522	13.3333	43.1052	NA	3	0	3
ENSMUSG00000026245	553	ENSMUST00000188247	Farsb	protein_coding	5utr	NA	NA	chr1	-	232	-27	-738	78478261	78478259	NA	NA	NA	13.5345	38.935	40.9924	93.4619	NA	3	0	3
ENSMUSG00000026281	749	ENSMUST00000027503, ENSMUST00000112890	Dtymk	protein_coding	cds	GCG	GAG	chr1	-	201	35.5	-110	93801720	93801718	NA	NA	NA	11.488	14.8528	11.5008	37.8416	NA	3	0	3
ENSMUSG00000026341	809	ENSMUST00000191578	Actr3	nonsense_mediated_decay	3utr	NA	NA	chr1	-	770	616	491	125403509	125403507	NA	NA	NA	12.6379	14.3767	16.0692	43.0838	NA	3	0	3
ENSMUSG00000026341	810	ENSMUST00000178474, ENSMUST00000027579	Actr3	protein_coding	cds	GAT	GGG	chr1	-	954	247	-171	125403510	125403508	NA	NA	NA	13.5142	14.1107	14.1372	41.7621	NA	3	0	3
ENSMUSG00000026341	813	ENSMUST00000178474, ENSMUST00000027579	Actr3	protein_coding	cds	GAT	TTA	chr1	-	921	236	-182	125403543	125403541	NA	NA	NA	10.2855	17.5124	25.9238	53.7216	NA	3	0	3
ENSMUSG00000026355	840	ENSMUST00000027601, ENSMUST00000190495	Mcm6	protein_coding	cds	GAT	GAA	chr1	-	1173.5	361	-446.5	128346009	128346007	NA	NA	NA	10.5157	25.3644	14.3767	50.2568	NA	3	0	3
ENSMUSG00000026356	850	ENSMUST00000027602	Dars	protein_coding	cds	ACT	TTA	chr1	-	1168	341.5	-159	128372220	128372218	NA	NA	NA	15.6565	11.9914	15.2088	42.8567	NA	3	0	3
ENSMUSG00000026434	857	ENSMUST00000189946, ENSMUST00000062264	Nucks1	protein_coding	cds	AGA	CTA	chr1	+	703.5	171.5	-62	131929746	131929748	NA	NA	NA	10.8333	15.4323	23.6714	49.9369	NA	3	0	3
ENSMUSG00000026496	1222	ENSMUST00000194608, ENSMUST00000027777	Parp1	nonsense_mediated_decay, protein_coding	cds	GCC	ATC	chr1	+	212.5	35	-506	180569138	180569140	NA	NA	NA	16.5888	34.7336	23.4524	74.7747	NA	3	0	3
ENSMUSG00000026496	1223	ENSMUST00000027777	Parp1	protein_coding	cds	TCT	GAG	chr1	+	327	74	-940	180573753	180573755	NA	NA	NA	13.2182	11.9989	14.4797	39.6967	NA	3	0	3
ENSMUSG00000026547	1155	ENSMUST00000111230, ENSMUST00000111228	Tagln2	protein_coding	cds	CAG	ATG	chr1	+	466.5	87.5	-111	172505844	172505846	NA	NA	NA	15.4506	18.5	21.9844	55.935	NA	3	0	3
ENSMUSG00000026687	1082	ENSMUST00000028004	Aldh9a1	protein_coding	cds	CAT	CTG	chr1	+	1319	358	-160	167361546	167361548	NA	NA	NA	15.3222	24.1041	25.6921	65.1184	NA	3	0	3
ENSMUSG00000026701	1023	ENSMUST00000192639	Prdx6	nonsense_mediated_decay	3utr	NA	NA	chr1	-	332	261	31	161243702	161243700	NA	NA	NA	18.8562	27.4172	27.8646	74.138	NA	3	0	3
ENSMUSG00000026701	1026	ENSMUST00000192639	Prdx6	nonsense_mediated_decay	cds	TCG	AGA	chr1	-	271	66	-10	161244237	161244235	NA	NA	NA	15.1725	27.3993	14.4373	57.0091	NA	3	0	3
ENSMUSG00000026701	1027	ENSMUST00000071718, ENSMUST00000051925	Prdx6	protein_coding	cds	GTC	GAG	chr1	-	489	106	-105	161244238	161244236	NA	NA	NA	13.8845	27.1227	11.9895	52.9967	NA	3	0	3
ENSMUSG00000026726	12443	ENSMUST00000091436	Cubn	protein_coding	cds	GAA	AAC	chr2	-	9576	3192	-431	13294285	13294283	NA	NA	NA	11.4584	25.635	29.3878	66.4812	NA	3	0	3
ENSMUSG00000026864	12763	ENSMUST00000028222, ENSMUST00000100171	Hspa5	protein_coding	cds	GAA	GAA	chr2	+	677.5	143	-512	34773241	34773243	NA	NA	NA	10.0703	25.349	26	61.4193	NA	3	0	3
ENSMUSG00000026864	12764	ENSMUST00000137145	Hspa5	nonsense_mediated_decay	3utr	NA	NA	chr2	+	412	270	142	34773242	34773244	NA	NA	NA	11.2262	24.0837	20.3564	55.6663	NA	3	0	3
ENSMUSG00000026864	12772	ENSMUST00000028222, ENSMUST00000100171	Hspa5	protein_coding	cds	CCT	ACA	chr2	+	854.5	202	-453	34773931	34773933	NA	NA	NA	12.4416	18.1336	24.4352	55.0105	NA	3	0	3
ENSMUSG00000027018	12905	ENSMUST00000112122, ENSMUST00000028408	Hat1	protein_coding	cds	CAC	AAG	chr2	+	663	158	-261.5	71420348	71420350	NA	NA	NA	10.205	19.3259	25.7957	55.3267	NA	3	0	3
ENSMUSG00000027067	13020	ENSMUST00000077798, ENSMUST00000130729, ENSMUST00000168266	Ssrp1	protein_coding	cds	GAC	GAT	chr2	+	1519.67	438	-241.667	85042710	85042712	NA	NA	NA	10.2859	15.9506	37.0725	63.309	NA	3	0	3
ENSMUSG00000027091	12997	ENSMUST00000081591	Zc3h15	protein_coding	cds	GAC	AAA	chr2	+	1298	360	-66	83662262	83662264	NA	NA	NA	10.3923	23.381	19.6231	53.3964	NA	3	0	3
ENSMUSG00000027099	12943	ENSMUST00000028511	Mtx2	protein_coding	cds	ACT	GAA	chr2	+	825	208	-55	74876306	74876308	NA	NA	NA	10.9697	12.9167	15.5902	39.4766	NA	3	0	3
ENSMUSG00000027108	12926	ENSMUST00000028517, ENSMUST00000100015, ENSMUST00000112055	Ola1	protein_coding	cds	AAT	GAG	chr2	-	247	59	-256.667	73203393	73203391	NA	NA	NA	10.4564	10.9123	10.9333	32.3019	NA	3	0	3
ENSMUSG00000027184	13115	ENSMUST00000143349	Caprin1	protein_coding	cds	CAA	ACA	chr2	-	498	165.5	-48	103768865	103768863	NA	NA	NA	10.6576	15.8052	16.6965	43.1593	NA	3	0	3
ENSMUSG00000027184	13132	ENSMUST00000028607, ENSMUST00000111147	Caprin1	protein_coding	cds	GCC	ATT	chr2	-	1330.5	385	-322	103775487	103775485	NA	NA	NA	12.343	16.1053	13.3732	41.8215	NA	3	0	3
ENSMUSG00000027184	13133	ENSMUST00000143188	Caprin1	protein_coding	cds	TGC	CAT	chr2	-	591	197	-55	103775488	103775486	NA	NA	NA	10.985	15.754	13.0832	39.8222	NA	3	0	3
ENSMUSG00000027184	13142	ENSMUST00000028607, ENSMUST00000111147	Caprin1	protein_coding	cds	GTG	GAG	chr2	-	970.5	264.5	-442	103777988	103777986	NA	NA	NA	13.3424	21.174	13.615	48.1314	NA	3	0	3
ENSMUSG00000027201	13297	ENSMUST00000067780, ENSMUST00000147105	Myef2	protein_coding	cds	CAT	GAA	chr2	-	1054.5	303.5	-258	125109002	125109000	NA	NA	NA	14.1421	13.66	28.0578	55.8599	NA	3	0	3
ENSMUSG00000027201	13298	ENSMUST00000089825	Myef2	protein_coding	cds	TCA	TGA	chr2	-	777	259	-270	125109003	125109001	NA	NA	NA	10.6066	16.392	31.0269	58.0255	NA	3	0	3
ENSMUSG00000027206	13312	ENSMUST00000110463, ENSMUST00000028635, ENSMUST00000110462	Cops2	protein_coding	cds	ATC	TCC	chr2	-	470.667	118	-313.667	125844828	125844826	NA	NA	NA	14.4938	26.4252	25.2413	66.1602	NA	3	0	3
ENSMUSG00000027236	13280	ENSMUST00000028668	Eif3j1	protein_coding	cds	ATA	AAA	chr2	+	376	83	-178	122041619	122041621	NA	NA	NA	15.4798	39.9029	21.852	77.2347	NA	3	0	3
ENSMUSG00000027239	13088	ENSMUST00000028672, ENSMUST00000069423, ENSMUST00000090602, ENSMUST00000111309	Mdk	protein_coding	cds	AAT	GCC	chr2	-	498.75	108.5	-31.5	91930888	91930886	NA	NA	NA	23.0466	22.901	17.503	63.4507	NA	3	0	3
ENSMUSG00000027404	13313	ENSMUST00000147570	Snrpb	nonsense_mediated_decay	3utr	NA	NA	chr2	-	983	815	603	130171937	130171935	NA	NA	NA	39.6309	62.533	16.8426	119.006	NA	3	0	3
ENSMUSG00000027423	13428	ENSMUST00000110030, ENSMUST00000028909	Snx5	protein_coding	cds	TTG	GAA	chr2	-	686.5	165	-239	144257888	144257886	NA	NA	NA	13.5412	28.2834	13.4606	55.2852	NA	3	0	3
ENSMUSG00000027533	13940	ENSMUST00000029046	Fabp5	protein_coding	cds	GGC	AGA	chr3	+	329	79	-56	10015128	10015130	NA	NA	NA	14.2622	20.9043	12.7889	47.9554	NA	3	0	3
ENSMUSG00000027620	13633	ENSMUST00000109587, ENSMUST00000146297, ENSMUST00000029149	Rbm39	protein_coding	cds	AAA	AAT	chr2	-	1659	462	-64	156149251	156149249	NA	NA	NA	11.332	11.6765	16.4995	39.508	NA	3	0	3
ENSMUSG00000027620	13647	ENSMUST00000142071, ENSMUST00000109587, ENSMUST00000146297, ENSMUST00000029149, ENSMUST00000148794, ENSMUST00000126992	Rbm39	nonsense_mediated_decay, protein_coding	cds	GTT, GGT	CGA, TCG	chr2	-	691.333	154.667	-274.5	156162881	156164806	NA	NA	NA	10.2414	16.9865	10.914	38.1419	NA	3	0	3
ENSMUSG00000027620	13649	ENSMUST00000146297, ENSMUST00000142071, ENSMUST00000029149, ENSMUST00000126992, ENSMUST00000109587	Rbm39	protein_coding, nonsense_mediated_decay	cds	TAC	AGA	chr2	-	554.8	94	-359.2	156172842	156172840	NA	NA	NA	14.2716	11.5133	23.7015	49.4863	NA	3	0	3
ENSMUSG00000027775	14183	ENSMUST00000029344	Mfsd1	protein_coding	cds	GGT	GGT	chr3	+	461	128	-336	67587932	67587934	NA	NA	NA	12.4516	13.2445	26.6344	52.3304	NA	3	0	3
ENSMUSG00000027782	14214	ENSMUST00000029353, ENSMUST00000194558	Kpna4	protein_coding	cds	GAT	GAA	chr3	-	1772.5	541	-31	69074185	69074183	NA	NA	NA	17.6751	36.9562	29.6486	84.2799	NA	3	0	3
ENSMUSG00000027804	14232	ENSMUST00000159505	Ppid	nonsense_mediated_decay	cds	AAG	TAT	chr3	+	123	41	-31	79595262	79595264	NA	NA	NA	11.5654	19.5	11.6145	42.6799	NA	3	0	3
ENSMUSG00000027804	14233	ENSMUST00000029382	Ppid	protein_coding	cds	AGT	ATT	chr3	+	396	96	-274	79595263	79595265	NA	NA	NA	12.3997	18.4015	11.6632	42.4644	NA	3	0	3
ENSMUSG00000028010	15000	ENSMUST00000029643, ENSMUST00000149071	Gar1	protein_coding	cds	TAC	TTA	chr3	-	530	113	-101	129829400	129829398	NA	NA	NA	24.4888	38.7089	29.367	92.5647	NA	3	0	3
ENSMUSG00000028029	15035	ENSMUST00000029663	Aimp1	protein_coding	cds	GAT	GCA	chr3	-	618	176	-143	132672070	132672068	NA	NA	NA	12.1554	14.9011	20.4009	47.4574	NA	3	0	3
ENSMUSG00000028081	14278	ENSMUST00000029722	Rps3a1	protein_coding	cds	CAT	GAC	chr3	-	754	207	-57	86138535	86138533	NA	NA	NA	12.0201	11.9186	16.9144	40.8531	NA	3	0	3
ENSMUSG00000028081	14279	ENSMUST00000029722	Rps3a1	protein_coding	cds	ACC	CGA	chr3	-	649	172	-92	86139087	86139085	NA	NA	NA	11.8853	17.8093	14.8212	44.5158	NA	3	0	3
ENSMUSG00000028173	15211	ENSMUST00000068952	Wls	protein_coding	cds	TGT	GAA	chr3	+	1332	353.5	-187	159911816	159911818	NA	NA	NA	17.7632	42.5691	25.7665	86.0988	NA	3	0	3
ENSMUSG00000028234	15217	ENSMUST00000138502	Rps20	protein_coding	cds	TCT	GAG	chr4	-	461	94	-25	3834579	3834577	NA	NA	NA	10.7483	41.546	60.9921	113.286	NA	3	0	3
ENSMUSG00000028234	15223	ENSMUST00000138502	Rps20	protein_coding	cds	GTG	AAA	chr4	-	326	49	-70	3834966	3834964	NA	NA	NA	12.5702	19.0155	22.3273	53.913	NA	3	0	3
ENSMUSG00000028333	15396	ENSMUST00000102926	Anp32b	protein_coding	cds	TAT	GAC	chr4	+	835	147	-125	46468672	46468674	NA	NA	NA	20.8059	34.157	24.2321	79.1949	NA	3	0	3
ENSMUSG00000028334	15403	ENSMUST00000030018	Nans	protein_coding	cds	CCT	GAA	chr4	+	1080	322.5	-36	46502533	46502535	NA	NA	NA	13.1197	27.279	20.5885	60.9872	NA	3	0	3
ENSMUSG00000028343	15418	ENSMUST00000030028	Erp44	protein_coding	cds	GGA	GAG	chr4	-	874	251.5	-154	48208703	48208701	NA	NA	NA	14.4168	21.609	17.2698	53.2956	NA	3	0	3
ENSMUSG00000028410	15269	ENSMUST00000030118, ENSMUST00000137246, ENSMUST00000149794, ENSMUST00000125442, ENSMUST00000164233	Dnaja1	protein_coding	cds	GAT	ATG	chr4	+	428	87.5	-193.6	40724104	40724106	NA	NA	NA	15.8693	16.4827	17.7723	50.1242	NA	3	0	3
ENSMUSG00000028452	15327	ENSMUST00000030164	Vcp	protein_coding	cds	GAG	CTG	chr4	-	1964	545	-261	42983424	42983422	NA	NA	NA	12.75	31.0833	21.826	65.6594	NA	3	0	3
ENSMUSG00000028495	15530	ENSMUST00000102814	Rps6	protein_coding	cds	TCT	GAG	chr4	-	815	243	-6	86854723	86854721	NA	NA	NA	11.8325	24.2898	32.6033	68.7257	NA	3	0	3
ENSMUSG00000028495	15548	ENSMUST00000102814	Rps6	protein_coding	cds	CGT	CGG	chr4	-	476	129.5	-119.5	86855973	86855971	NA	NA	NA	10.3893	17.8226	17.6567	45.8687	NA	3	0	3
ENSMUSG00000028645	15806	ENSMUST00000134105, ENSMUST00000030398	Slc2a1	protein_coding	cds	TAC	TGC	chr4	+	647.5	129	-186.5	119132560	119132562	NA	NA	NA	12.6194	11.2244	10.0767	33.9206	NA	3	0	3
ENSMUSG00000028645	15845	ENSMUST00000174372	Slc2a1	nonsense_mediated_decay	3utr	NA	NA	chr4	+	1058	1016	495	119135875	119135877	NA	NA	NA	21.3415	15.3003	11.6741	48.3159	NA	3	0	3
ENSMUSG00000028693	15663	ENSMUST00000030456, ENSMUST00000030457, ENSMUST00000081182	Nasp	protein_coding	cds	AAG	GAA	chr4	-	1344.33	415.833	-131.5	116603949	116603947	NA	NA	NA	10.5877	24.2499	29.2374	64.075	NA	3	0	3
ENSMUSG00000028729	15789	ENSMUST00000030501	Ebna1bp2	protein_coding	cds	CAG	AAA	chr4	+	1027	297.5	-8	118625843	118625845	NA	NA	NA	14.9751	27.1863	25.5471	67.7084	NA	3	0	3
ENSMUSG00000028820	15943	ENSMUST00000030623	Sfpq	protein_coding	cds	GGT	GGC	chr4	+	750	219	-480	127022073	127022075	NA	NA	NA	23.2568	45.2379	17.7218	86.2165	NA	3	0	3
ENSMUSG00000028820	15951	ENSMUST00000030623	Sfpq	protein_coding	cds	CTT	GAA	chr4	+	1416	441	-258	127023701	127023703	NA	NA	NA	17.9723	11.2528	14.0718	43.297	NA	3	0	3
ENSMUSG00000028832	16150	ENSMUST00000105867	Stmn1	protein_coding	cds	CTG	GAG	chr4	+	438	119	-28	134472974	134472976	NA	NA	NA	18.18	13.5241	14.2477	45.9517	NA	3	0	3
ENSMUSG00000028837	15934	ENSMUST00000030642	Psmb2	protein_coding	cds	CTC	CTC	chr4	+	428	101	-100	126706075	126706077	NA	NA	NA	12.7758	14.0579	17.9337	44.7674	NA	3	0	3
ENSMUSG00000028873	15922	ENSMUST00000084296, ENSMUST00000030690	Cdca8	protein_coding	cds	CCC	ATA	chr4	-	933	239.5	-67.5	124920277	124920275	NA	NA	NA	25.4893	11.9172	13.1007	50.5072	NA	3	0	3
ENSMUSG00000028961	16304	ENSMUST00000084124	Pgd	protein_coding	cds	GGA	GAA	chr4	-	1496	460.5	-22	149150713	149150711	NA	NA	NA	10.6973	25.3114	12.943	48.9517	NA	3	0	3
ENSMUSG00000029147	16530	ENSMUST00000031032	Ppm1g	protein_coding	cds	CCC	CGA	chr5	-	1774	503	-39	31203059	31203057	NA	NA	NA	10.3486	12.5078	10.312	33.1684	NA	3	0	3
ENSMUSG00000029169	16656	ENSMUST00000031061	Dhx15	protein_coding	cds	GGA	TTT	chr5	-	1481	439	-356	52162552	52162550	NA	NA	NA	15.5793	31.3185	37.0143	83.9121	NA	3	0	3
ENSMUSG00000029198	16591	ENSMUST00000031099	Grpel1	protein_coding	cds	CCC	TCT	chr5	+	355	53	-164	36469534	36469536	NA	NA	NA	12.0125	28.5005	52.8814	93.3945	NA	3	0	3
ENSMUSG00000029390	17295	ENSMUST00000060226, ENSMUST00000135464	Tmed2	protein_coding	cds	CAC	GAA	chr5	+	385	100.5	-56	124546957	124546959	NA	NA	NA	14.8186	24.1119	22.2333	61.1637	NA	3	0	3
ENSMUSG00000029447	17359	ENSMUST00000031402	Cct6a	protein_coding	cds	CAT	AAA	chr5	+	591	197	-335	129790664	129790666	NA	NA	NA	11.2526	26.0039	22.768	60.0245	NA	3	0	3
ENSMUSG00000029447	17361	ENSMUST00000031402	Cct6a	protein_coding	cds	GTT	AAA	chr5	+	810	270	-262	129791867	129791869	NA	NA	NA	20.0852	54.3823	43.1372	117.605	NA	3	0	3
ENSMUSG00000029580	17616	ENSMUST00000100497, ENSMUST00000171419, ENSMUST00000106216	Actb	protein_coding	cds	TGG	GAC	chr5	-	347	79	-183.667	142905366	142905364	NA	NA	NA	13.0128	18.0283	19.1448	50.1859	NA	3	0	3
ENSMUSG00000029580	17621	ENSMUST00000100497, ENSMUST00000171419, ENSMUST00000106216	Actb	protein_coding	cds	GAG	GCC	chr5	-	276.5	56.75	-177.5	142905432	142905430	NA	NA	NA	10.1818	19.2693	19.027	48.4782	NA	3	0	3
ENSMUSG00000029581	17648	ENSMUST00000031565	Fscn1	protein_coding	cds	AAC	CGC	chr5	+	1249	381	-112	142970549	142970551	NA	NA	NA	10.2132	10.594	12.2475	33.0546	NA	3	0	3
ENSMUSG00000029581	17649	ENSMUST00000129306	Fscn1	protein_coding	cds	ACC	GCC	chr5	+	387	128.5	-112	142970550	142970552	NA	NA	NA	10.7257	10.712	12.2475	33.6852	NA	3	0	3
ENSMUSG00000029730	17513	ENSMUST00000148879, ENSMUST00000000505	Mcm7	protein_coding	cds	ATT	GAA	chr5	-	670	102	-452	138169444	138169442	NA	NA	NA	10.4094	28.2555	29.3979	68.0629	NA	3	0	3
ENSMUSG00000030007	18331	ENSMUST00000032078	Cct7	protein_coding	cds	CTG	CTG	chr6	+	1172	188	-356	85462134	85462136	NA	NA	NA	20.4278	27.7111	13.3778	61.5166	NA	3	0	3
ENSMUSG00000030057	18391	ENSMUST00000113617, ENSMUST00000032138	Cnbp	protein_coding	cds	CCT	GAC	chr6	-	391.5	50	-127.5	87845532	87845530	NA	NA	NA	14.9324	29.2119	45	89.1443	NA	3	0	3
ENSMUSG00000030057	18394	ENSMUST00000113619	Cnbp	protein_coding	cds	CCT	GAC	chr6	-	320	43	-127	87845677	87845675	NA	NA	NA	14.9324	29.6765	46.5333	91.1421	NA	3	0	3
ENSMUSG00000030058	18408	ENSMUST00000113607	Copg1	protein_coding	cds	TCA	GAG	chr6	+	1929	568.5	-305	87904874	87904876	NA	NA	NA	17.3841	82.3618	108.044	207.79	NA	3	0	3
ENSMUSG00000030058	18412	ENSMUST00000113607	Copg1	protein_coding	cds	CCA	GAA	chr6	+	2679	818.5	-55	87910101	87910103	NA	NA	NA	13.9094	26.6837	32.0956	72.6887	NA	3	0	3
ENSMUSG00000030082	18450	ENSMUST00000032168	Sec61a1	protein_coding	cds	CCG	GAA	chr6	-	1254	347	-129	88506867	88506865	NA	NA	NA	19.9479	14.7411	14.1657	48.8547	NA	3	0	3
ENSMUSG00000030224	18982	ENSMUST00000064910	Strap	protein_coding	cds	AAC	AAA	chr6	+	664	128	-221	137739811	137739813	NA	NA	NA	13.6023	34.376	21.9091	69.8873	NA	3	0	3
ENSMUSG00000030357	18916	ENSMUST00000032508, ENSMUST00000150387, ENSMUST00000151796	Fkbp4	protein_coding	cds	CCC	AAC	chr6	-	393.667	91.1667	-209.833	128435738	128435736	NA	NA	NA	15.9423	23.1664	14.234	53.3427	NA	3	0	3
ENSMUSG00000030695	20516	ENSMUST00000032934, ENSMUST00000106348, ENSMUST00000087566	Aldoa	protein_coding	cds	AGT	GGC	chr7	-	1262.67	363	-19	126795479	126795477	NA	NA	NA	14.6027	19.6931	10.2172	44.5131	NA	3	0	3
ENSMUSG00000030695	20532	ENSMUST00000032934, ENSMUST00000106348, ENSMUST00000087566, ENSMUST00000151137	Aldoa	protein_coding	cds	AAC	ATG	chr7	-	856	241.6	-81.8	126796056	126796054	NA	NA	NA	10.5354	21.4467	17.3929	49.375	NA	3	0	3
ENSMUSG00000030695	20539	ENSMUST00000032934, ENSMUST00000087566, ENSMUST00000151137, ENSMUST00000106348	Aldoa	protein_coding	cds	GTG	GAG	chr7	-	745.25	199.5	-146	126796283	126796281	NA	NA	NA	11.4756	17.0153	45.7607	74.2516	NA	3	0	3
ENSMUSG00000030744	20065	ENSMUST00000032998	Rps3	protein_coding	cds	GTG	CCT	chr7	-	834	239	-4	99479292	99479290	NA	NA	NA	10.2453	12.9245	23.9549	47.1247	NA	3	0	3
ENSMUSG00000030744	20070	ENSMUST00000032998	Rps3	protein_coding	cds	AAA	GAT	chr7	-	756	213	-30	99479370	99479368	NA	NA	NA	20.2556	34.8733	12.204	67.3329	NA	3	0	3
ENSMUSG00000030869	20432	ENSMUST00000106471	Ndufab1	protein_coding	cds	AGA	AAA	chr7	-	198	66	-61	122096616	122096614	NA	NA	NA	10.0416	13.6652	32.0428	55.7496	NA	3	0	3
ENSMUSG00000030978	20127	ENSMUST00000033283	Rrm1	protein_coding	cds	ATT	GAA	chr7	+	1011	227	-565	102454526	102454528	NA	NA	NA	11.7268	26.1081	21.6372	59.4721	NA	3	0	3
ENSMUSG00000031299	24314	ENSMUST00000033662	Pdha1	protein_coding	cds	GGA	GTA	chrX	-	992	296.5	-93	160126202	160126200	NA	NA	NA	13.1183	13.5105	16.5931	43.2218	NA	3	0	3
ENSMUSG00000031311	23966	ENSMUST00000147708, ENSMUST00000033673	Nono	protein_coding	cds	GGA	GAG	chrX	+	404	67	-218	101439527	101439529	NA	NA	NA	11.8581	18.8946	10.0965	40.8492	NA	3	0	3
ENSMUSG00000031311	23971	ENSMUST00000033673	Nono	protein_coding	cds	CTG	GAA	chrX	+	772	165	-308	101441656	101441658	NA	NA	NA	10.2108	22.9144	17.048	50.1732	NA	3	0	3
ENSMUSG00000031311	23987	ENSMUST00000033673	Nono	protein_coding	cds	TTT	GGC	chrX	+	1585	436	-37	101447614	101447616	NA	NA	NA	10.5013	18.3321	13.5315	42.365	NA	3	0	3
ENSMUSG00000031353	24330	ENSMUST00000033720, ENSMUST00000112326	Rbbp7	protein_coding	cds	GGT	TCT	chrX	+	581	107	-298.5	162769777	162769779	NA	NA	NA	20.8669	29.141	15.1396	65.1474	NA	3	0	3
ENSMUSG00000031422	24188	ENSMUST00000113097, ENSMUST00000033797, ENSMUST00000164609, ENSMUST00000166930, ENSMUST00000080411, ENSMUST00000169418, ENSMUST00000166478	Morf4l2	protein_coding	cds	TTT	ACT	chrX	-	1110.8	269.7	-18	136733668	136733666	NA	NA	NA	14.5962	23.2141	24.5986	62.4089	NA	3	0	3
ENSMUSG00000031422	24197	ENSMUST00000155207, ENSMUST00000113095, ENSMUST00000137605, ENSMUST00000113097, ENSMUST00000080411, ENSMUST00000164609, ENSMUST00000166478	Morf4l2	protein_coding	cds	CCC	CCT	chrX	-	447.143	66	-183	136734280	136734278	NA	NA	NA	12.544	11.9909	13.1277	37.6626	NA	3	0	3
ENSMUSG00000031447	20895	ENSMUST00000033824	Lamp1	protein_coding	cds	TGC	CTG	chr8	+	891	221	-185	13171297	13171299	NA	NA	NA	18.1244	15.4965	10.1666	43.7875	NA	3	0	3
ENSMUSG00000031502	20879	ENSMUST00000033898	Col4a1	protein_coding	cds	GGT	GAA	chr8	-	2069	613.5	-1055	11226380	11226378	NA	NA	NA	15.3647	42.206	18.7329	76.3037	NA	3	0	3
ENSMUSG00000031502	20890	ENSMUST00000033898	Col4a1	protein_coding	cds	GGA	GAA	chr8	-	470	80.5	-1588	11246899	11246897	NA	NA	NA	11.0622	24.4099	25	60.4721	NA	3	0	3
ENSMUSG00000031633	20995	ENSMUST00000034049	Slc25a4	protein_coding	cds	GGC	GAC	chr8	-	833	157	-141	46209149	46209147	NA	NA	NA	20.9846	13.353	10.9665	45.3042	NA	3	0	3
ENSMUSG00000031672	21443	ENSMUST00000034097	Got2	protein_coding	cds	CCT	CTC	chr8	-	1199	319	-111	95869534	95869532	NA	NA	NA	11.503	11.6437	14.2974	37.4442	NA	3	0	3
ENSMUSG00000031696	21342	ENSMUST00000034131	Vps35	protein_coding	cds	GAA	AAA	chr8	-	963	205	-590	85281243	85281241	NA	NA	NA	10.7712	11.3137	13.6708	35.7557	NA	3	0	3
ENSMUSG00000031701	21352	ENSMUST00000034138	Dnaja2	protein_coding	cds	GGA	CTT	chr8	-	916	272.5	-139	85540335	85540333	NA	NA	NA	10.4861	10.4083	17.6777	38.572	NA	3	0	3
ENSMUSG00000031701	21356	ENSMUST00000034138	Dnaja2	protein_coding	cds	GGA	GAA	chr8	-	304	69	-343	85553269	85553267	NA	NA	NA	22.2716	16.9454	15.3624	54.5795	NA	3	0	3
ENSMUSG00000031715	21203	ENSMUST00000043359	Smarca5	protein_coding	cds	AAT	GAA	chr8	-	2033	544	-507	80716584	80716582	NA	NA	NA	12	25.6667	19.9065	57.5731	NA	3	0	3
ENSMUSG00000031715	21209	ENSMUST00000043359	Smarca5	protein_coding	cds	TGG	ATG	chr8	-	1127	242	-809	80727688	80727686	NA	NA	NA	10.5	21.2592	16.4415	48.2006	NA	3	0	3
ENSMUSG00000031781	21397	ENSMUST00000034233	Ciapin1	protein_coding	cds	GAG	GAA	chr8	-	404	20.5	-288	94823073	94823071	NA	NA	NA	16.8877	11.3137	22.7257	50.9271	NA	3	0	3
ENSMUSG00000031781	21408	ENSMUST00000161792, ENSMUST00000161762	Ciapin1	protein_coding, nonsense_mediated_decay	cds, 3utr	GAG, NA	GAA, NA	chr8	-	259.667	236.333	-85	94829205	94829203	NA	NA	NA	16.8104	11.3137	17.3457	45.4698	NA	3	0	3
ENSMUSG00000031781	21410	ENSMUST00000162538	Ciapin1	protein_coding	cds	GAG	GAA	chr8	-	199	20.5	-288	94832609	94832607	NA	NA	NA	16.8877	11.3137	22.7257	50.9271	NA	3	0	3
ENSMUSG00000031818	21631	ENSMUST00000034276, ENSMUST00000181586, ENSMUST00000181795	Cox4i1	protein_coding	cds	GCG	CTC	chr8	+	452.333	96.3333	-46.6667	120673321	120673323	NA	NA	NA	10.509	12.5893	21.6506	44.7489	NA	3	0	3
ENSMUSG00000031818	21632	ENSMUST00000181847	Cox4i1	nonsense_mediated_decay	3utr	NA	NA	chr8	+	506	484	287	120673322	120673324	NA	NA	NA	12.3589	17.1873	25.6279	55.1742	NA	3	0	3
ENSMUSG00000031821	21606	ENSMUST00000034278	Gins2	protein_coding	cds	CGA	GTG	chr8	-	673	127.5	-57	120582130	120582128	NA	NA	NA	10.7792	11.5579	26.1517	48.4888	NA	3	0	3
ENSMUSG00000031883	21461	ENSMUST00000159416, ENSMUST00000162761	Car7	protein_coding	5utr	NA	NA	chr8	+	407	-30	-656	104543508	104543510	NA	NA	NA	13.5974	13.5105	16.8158	43.9237	NA	3	0	3
ENSMUSG00000031948	21572	ENSMUST00000164470, ENSMUST00000034426	Kars	protein_coding	cds	CAT	GAC	chr8	-	1180.5	359.5	-250	111998837	111998835	NA	NA	NA	13.1708	27.301	25.1612	65.633	NA	3	0	3
ENSMUSG00000031948	21573	ENSMUST00000093120	Kars	protein_coding	cds	CAT	GAC	chr8	-	1213	374	-250	111998859	111998857	NA	NA	NA	13.1708	27.301	25.1612	65.633	NA	3	0	3
ENSMUSG00000032040	21916	ENSMUST00000034539, ENSMUST00000119847	Dcps	protein_coding	cds	CTG	GAA	chr9	-	584	163.5	-150.5	35136371	35136369	NA	NA	NA	20.0578	17.0884	17.8979	55.044	NA	3	0	3
ENSMUSG00000032083	22150	ENSMUST00000034588, ENSMUST00000132155	Apoa1	protein_coding	cds	GAG	AAA	chr9	+	500	97.5	-94.5	46229901	46229903	NA	NA	NA	11.4138	28.6958	16.1683	56.2778	NA	3	0	3
ENSMUSG00000032083	22160	ENSMUST00000034588	Apoa1	protein_coding	cds	CCC	CAC	chr9	+	737	187	-77	46230168	46230170	NA	NA	NA	11.5308	24.37	11.0753	46.9761	NA	3	0	3
ENSMUSG00000032096	22120	ENSMUST00000034607	Arcn1	protein_coding	cds	TCG	GAA	chr9	-	1319	382	-129	44750420	44750418	NA	NA	NA	18.7528	31.1306	16.9333	66.8168	NA	3	0	3
ENSMUSG00000032115	22077	ENSMUST00000159473, ENSMUST00000066601, ENSMUST00000161318, ENSMUST00000160902	Hyou1	protein_coding	cds	CTG	GGT	chr9	+	921.5	256.25	-549.5	44384121	44384123	NA	NA	NA	13.5451	15.2788	12.0305	40.8544	NA	3	0	3
ENSMUSG00000032115	22084	ENSMUST00000162560	Hyou1	nonsense_mediated_decay	3utr	NA	NA	chr9	+	669	611	93	44385682	44385684	NA	NA	NA	12.3007	47.0137	27.0234	86.3378	NA	3	0	3
ENSMUSG00000032115	22086	ENSMUST00000066601, ENSMUST00000161318, ENSMUST00000160902	Hyou1	protein_coding	cds	GAC	TTG	chr9	+	2330.67	708.5	-290	44388140	44388142	NA	NA	NA	14.3048	23.3469	21.672	59.3237	NA	3	0	3
ENSMUSG00000032216	22642	ENSMUST00000034740, ENSMUST00000184450, ENSMUST00000184333	Nedd4	protein_coding	cds	CCA	GAA	chr9	+	1235.33	208.333	-254	72718271	72718273	NA	NA	NA	12.6206	11.7179	19.2296	43.5681	NA	3	0	3
ENSMUSG00000032216	22661	ENSMUST00000034740	Nedd4	protein_coding	cds	TTT	GAA	chr9	+	2440	743	-144	72741633	72741635	NA	NA	NA	23.3017	40.4772	34.9104	98.6892	NA	3	0	3
ENSMUSG00000032216	22663	ENSMUST00000184020	Nedd4	nonsense_mediated_decay	3utr	NA	NA	chr9	+	175	174	84	72743549	72743551	NA	NA	NA	13.2615	14.2743	11.547	39.0828	NA	3	0	3
ENSMUSG00000032294	22348	ENSMUST00000163694	Pkm	protein_coding	cds	TTC	CTG	chr9	+	165	24.5	-506.5	59656532	59656534	NA	NA	NA	13.2632	11.2499	12.7148	37.2279	NA	3	0	3
ENSMUSG00000032294	22373	ENSMUST00000034834	Pkm	protein_coding	cds	CTC	TAC	chr9	+	604	103	-428	59668611	59668613	NA	NA	NA	14.112	13.7462	11.0944	38.9526	NA	3	0	3
ENSMUSG00000032294	22443	ENSMUST00000034834	Pkm	protein_coding	cds	CCC	ACA	chr9	+	1516	407	-124	59675648	59675650	NA	NA	NA	10.2705	20.2654	22.398	52.9338	NA	3	0	3
ENSMUSG00000032299	22330	ENSMUST00000065358	Commd4	protein_coding	cds	AAG	CTG	chr9	-	141	27.5	-171	57156800	57156798	NA	NA	NA	15.2931	14.2865	19.8142	49.3938	NA	3	0	3
ENSMUSG00000032330	22812	ENSMUST00000034881	Cox7a2	protein_coding	cds	CCC	AAG	chr9	-	455	77.5	-5	79755540	79755538	NA	NA	NA	10.3259	15.068	12.7469	38.1407	NA	3	0	3
ENSMUSG00000032359	22841	ENSMUST00000132718, ENSMUST00000034915, ENSMUST00000185459	Ctsh	protein_coding	cds	GAG	TCA	chr9	+	538.333	144	-129.333	90064551	90064553	NA	NA	NA	17.5833	14.005	26.0215	57.6098	NA	3	0	3
ENSMUSG00000032399	22519	ENSMUST00000034966	Rpl4	protein_coding	cds	CGT	TGG	chr9	+	383	109	-310	64175640	64175642	NA	NA	NA	21.1246	31.2024	17.0664	69.3935	NA	3	0	3
ENSMUSG00000032437	23141	ENSMUST00000035010	Stt3b	protein_coding	cds	AGA	GAA	chr9	-	2108	581	-242	115251825	115251823	NA	NA	NA	17.282	58.3119	53.6299	129.224	NA	3	0	3
ENSMUSG00000032518	23175	ENSMUST00000035105	Rpsa	protein_coding	cds	GCT	CCT	chr9	+	877	234	-61	120131151	120131153	NA	NA	NA	11.4295	10.0643	10.9371	32.4309	NA	3	0	3
ENSMUSG00000032563	22943	ENSMUST00000149243, ENSMUST00000035177	Mrpl3	protein_coding	cds	GGA	CTG	chr9	+	686	167.5	-158	105061934	105061936	NA	NA	NA	10.589	18.3107	22.7365	51.6362	NA	3	0	3
ENSMUSG00000032607	22999	ENSMUST00000035230	Amt	protein_coding	cds	GGA	GGC	chr9	+	435	122.5	-280	108298797	108298799	NA	NA	NA	11.9257	23.9359	12.7248	48.5864	NA	3	0	3
ENSMUSG00000032939	21376	ENSMUST00000109547	Nup93	protein_coding	cds	ATT	GAA	chr8	+	355	112.5	-706.5	94281312	94281314	NA	NA	NA	10.3514	11.3165	17.8656	39.5335	NA	3	0	3
ENSMUSG00000032939	21377	ENSMUST00000079961	Nup93	protein_coding	cds	ATT	GAA	chr8	+	421	112.5	-706.5	94286500	94286502	NA	NA	NA	10.3514	11.3165	17.8656	39.5335	NA	3	0	3
ENSMUSG00000032966	13464	ENSMUST00000044011	Fkbp1a	protein_coding	cds	GAA	GAT	chr2	+	318	31	-77	151557393	151557395	NA	NA	NA	10.0664	42.564	29.7858	82.4163	NA	3	0	3
ENSMUSG00000033475	10811	ENSMUST00000113302, ENSMUST00000113301	Tomm6	protein_coding	cds	GCT	GCG	chr17	-	255.5	52	-22	47687261	47687259	NA	NA	NA	15.5496	39.1595	16.9251	71.6343	NA	3	0	3
ENSMUSG00000033845	1	ENSMUST00000156816	Mrpl15	protein_coding	cds	CCT	GAG	chr1	-	677	204.5	-90	4776737	4776735	NA	NA	NA	27.8257	25.6667	12.9496	66.4419	NA	3	0	3
ENSMUSG00000033845	8	ENSMUST00000130201, ENSMUST00000156816, ENSMUST00000146665	Mrpl15	protein_coding	cds	GGC	CAT	chr1	-	202.333	50	-172.333	4784061	4784059	NA	NA	NA	10.8887	13.0506	11.9843	35.9236	NA	3	0	3
ENSMUSG00000034024	2200	ENSMUST00000047672	Cct2	protein_coding	cds	GCC	CTT	chr10	-	1201	364.5	-170	117056047	117056045	NA	NA	NA	12.0603	13.2385	25.441	50.7398	NA	3	0	3
ENSMUSG00000034088	721	ENSMUST00000170883, ENSMUST00000042498, ENSMUST00000186164	Hdlbp	protein_coding	cds	CAT	TTT	chr1	-	2515.67	790	-455	93417343	93417341	NA	NA	NA	18.1217	61.1323	36.578	115.832	NA	3	0	3
ENSMUSG00000034484	11346	ENSMUST00000037850	Snx2	protein_coding	cds	TCC	TTG	chr18	+	307	80.5	-438	53194495	53194497	NA	NA	NA	12.5965	14.0359	15.0185	41.6509	NA	3	0	3
ENSMUSG00000034566	4587	ENSMUST00000106537, ENSMUST00000043931, ENSMUST00000073791, ENSMUST00000137754, ENSMUST00000180072	Atp5h	protein_coding	cds	TTT	GAA	chr11	-	283.6	68.5	-87.4	115417851	115417849	NA	NA	NA	10.523	22.228	20.3261	53.0772	NA	3	0	3
ENSMUSG00000034868	10935	ENSMUST00000038446	Myl12b	protein_coding	cds	CTG	GAC	chr17	-	640	69	-103	70975495	70975493	NA	NA	NA	10.3126	29.9944	49.6448	89.9518	NA	3	0	3
ENSMUSG00000034994	1899	ENSMUST00000047864	Eef2	protein_coding	cds	ATT	CTC	chr10	+	2076	660	-198	81181070	81181072	NA	NA	NA	14.1451	21.8377	38.5155	74.4982	NA	3	0	3
ENSMUSG00000035376	9496	ENSMUST00000061156	Hacd2	protein_coding	cds	CAT	GCA	chr16	+	695	214	-40	35102077	35102079	NA	NA	NA	24.3489	18.7973	32.0664	75.2126	NA	3	0	3
ENSMUSG00000035530	4301	ENSMUST00000049385, ENSMUST00000151513	Eif1	protein_coding	cds	GGG	ATC	chr11	+	399.5	63.5	-47.5	100320778	100320780	NA	NA	NA	13.8155	17.6739	30.1181	61.6074	NA	3	0	3
ENSMUSG00000035530	4302	ENSMUST00000152521	Eif1	protein_coding	cds	GGA	TCG	chr11	+	72	23.5	-66	100320779	100320781	NA	NA	NA	16.1261	17.2996	27.1654	60.5911	NA	3	0	3
ENSMUSG00000035674	19021	ENSMUST00000076657, ENSMUST00000108644	Ndufa3	protein_coding	cds	AAG	AAC	chr7	+	285.5	89	-3	3620080	3620082	NA	NA	NA	12.5442	18.2136	16.3672	47.125	NA	3	0	3
ENSMUSG00000036030	22679	ENSMUST00000055535	Prtg	protein_coding	cds	ATT	AAA	chr9	+	1681	366	-825	72849894	72849896	NA	NA	NA	11.0774	15.1667	20.6033	46.8473	NA	3	0	3
ENSMUSG00000036030	22686	ENSMUST00000055535	Prtg	protein_coding	cds	GGT	GAC	chr9	+	2575	663.5	-527	72858918	72858920	NA	NA	NA	11.8936	32.0167	46.3801	90.2904	NA	3	0	3
ENSMUSG00000036181	6544	ENSMUST00000040914	H1f2	protein_coding	cds	CCT	GCT	chr13	+	56	5	-207	23738863	23738865	NA	NA	NA	15.292	21.5706	18.6699	55.5325	NA	3	0	3
ENSMUSG00000036275	3213	ENSMUST00000109057, ENSMUST00000036952	9530068E07Rik	protein_coding	cds	CCA	AAC	chr11	+	193	46.5	-208	52403062	52403064	NA	NA	NA	25.8446	32.2175	18.7654	76.8276	NA	3	0	3
ENSMUSG00000036309	3181	ENSMUST00000116595, ENSMUST00000147684	Skp1a	nonsense_mediated_decay	3utr	NA	NA	chr11	+	434	371	210	52243699	52243701	NA	NA	NA	13.6628	21.7721	17.2865	52.7213	NA	3	0	3
ENSMUSG00000036315	10648	ENSMUST00000113669, ENSMUST00000172518, ENSMUST00000172823	Znrd1	protein_coding	cds	TTT	CAG	chr17	-	458.333	107.833	-7	36954552	36954550	NA	NA	NA	10.956	21.1678	30.5723	62.6961	NA	3	0	3
ENSMUSG00000036371	18232	ENSMUST00000042990	Serbp1	protein_coding	cds	TTC	CGG	chr6	+	1499	342	-65	67284116	67284118	NA	NA	NA	10.5465	13.4879	13.7644	37.7989	NA	3	0	3
ENSMUSG00000036438	11009	ENSMUST00000040440	Calm2	protein_coding	cds	AAA	GAA	chr17	-	179	12.5	-136.5	87435930	87435928	NA	NA	NA	16.9637	13.0911	24.149	54.2037	NA	3	0	3
ENSMUSG00000036752	12553	ENSMUST00000043584	Tubb4b	protein_coding	cds	TAC	AAC	chr2	-	262	50	-395	25224140	25224138	NA	NA	NA	14.983	22.6267	12.5593	50.169	NA	3	0	3
ENSMUSG00000036781	22602	ENSMUST00000146573, ENSMUST00000127896, ENSMUST00000147394	Rps27l	protein_coding, nonsense_mediated_decay	3utr	NA	NA	chr9	+	292.333	260.333	44	66949343	66949345	NA	NA	NA	11.5762	12.1931	14.4837	38.2529	NA	3	0	3
ENSMUSG00000037072	15124	ENSMUST00000082437	Selenof	protein_coding	cds	CTA	AAG	chr3	+	680	126.5	-35	144596846	144596848	NA	NA	NA	11.7374	12.9116	10.4608	35.1097	NA	3	0	3
ENSMUSG00000037149	5121	ENSMUST00000071103	Ddx1	protein_coding	cds	GAT	AAT	chr12	-	880	261.5	-478	13237244	13237242	NA	NA	NA	19.1967	36.0837	59.1178	114.398	NA	3	0	3
ENSMUSG00000037278	3806	ENSMUST00000103242	Tmem97	protein_coding	cds	TTC	ATG	chr11	-	601	159	-17	78542591	78542589	NA	NA	NA	12.2552	11.5391	10.3341	34.1284	NA	3	0	3
ENSMUSG00000037563	19502	ENSMUST00000082134	Rps16	protein_coding	cds	CGA	CAG	chr7	+	404	84	-62	28352367	28352369	NA	NA	NA	11.2083	25.0489	33.8265	70.0838	NA	3	0	3
ENSMUSG00000037601	4051	ENSMUST00000107844	Nme1	protein_coding	3utr	NA	NA	chr11	-	418	361	8	93960702	93960700	NA	NA	NA	10.8025	46.9863	36.402	94.1908	NA	3	0	3
ENSMUSG00000037742	22730	ENSMUST00000042235	Eef1a1	protein_coding	cds	GGC	GAT	chr9	-	1308	396	-66	78479034	78479032	NA	NA	NA	14.7296	51.4159	27.0386	93.1842	NA	3	0	3
ENSMUSG00000037742	22736	ENSMUST00000042235	Eef1a1	protein_coding	cds	GCT	CCT	chr9	-	1191	357	-105	78479151	78479149	NA	NA	NA	22.8234	41.2397	40.5844	104.647	NA	3	0	3
ENSMUSG00000037742	22747	ENSMUST00000042235	Eef1a1	protein_coding	cds	CTT	CCT	chr9	-	1026	302	-160	78479401	78479399	NA	NA	NA	11.7166	40.6716	67.5974	119.985	NA	3	0	3
ENSMUSG00000037742	22763	ENSMUST00000042235, ENSMUST00000154207	Eef1a1	protein_coding	cds	AAA	GAT	chr9	-	770	217.5	-137.5	78479742	78479740	NA	NA	NA	14.1856	34.8339	23.2601	72.2796	NA	3	0	3
ENSMUSG00000037815	11207	ENSMUST00000042345	Ctnna1	protein_coding	cds	ATT	AAA	chr18	+	2768	881	-25	35253843	35253845	NA	NA	NA	15.1818	19.9501	24.8261	59.958	NA	3	0	3
ENSMUSG00000037851	6811	ENSMUST00000165316, ENSMUST00000164260, ENSMUST00000047363	Iars	protein_coding	cds	CCT	TTC	chr13	+	1810	582	-680	49711795	49711797	NA	NA	NA	11.8433	24.2098	28.8928	64.9459	NA	3	0	3
ENSMUSG00000037894	15048	ENSMUST00000172696	H2az1	nonsense_mediated_decay	cds	CGG	ACG	chr3	+	93	31	-23	137865569	137865571	NA	NA	NA	13.3992	44.9296	40.6834	99.0122	NA	3	0	3
ENSMUSG00000037894	15058	ENSMUST00000172696	H2az1	nonsense_mediated_decay	3utr	NA	NA	chr3	+	170	169	5	137866023	137866025	NA	NA	NA	12.5387	48.7262	25.4224	86.6872	NA	3	0	3
ENSMUSG00000038005	21034	ENSMUST00000037190	Hpf1	protein_coding	cds	CCT	GAG	chr8	+	374	111.5	-234	60895588	60895590	NA	NA	NA	14.609	20.4315	47.2042	82.2446	NA	3	0	3
ENSMUSG00000038274	11723	ENSMUST00000179142	Fau	protein_coding	cds	CAG	GAA	chr19	+	569	95	-38	6059357	6059359	NA	NA	NA	15.4055	27.5471	29.2576	72.2101	NA	3	0	3
ENSMUSG00000038274	11732	ENSMUST00000178310	Fau	protein_coding	cds	CAG	GAA	chr19	+	451	95	-38	6059404	6059406	NA	NA	NA	13.4089	25.2591	27.1383	65.8062	NA	3	0	3
ENSMUSG00000038335	3670	ENSMUST00000045807	Tsr1	protein_coding	cds	GAC	AGG	chr11	+	2105	688	-115	74907870	74907872	NA	NA	NA	14.04	41.4076	27.3985	82.846	NA	3	0	3
ENSMUSG00000038374	14790	ENSMUST00000048915	Rbm8a	protein_coding	cds	GGG	GAA	chr3	+	314	95	-78	96630940	96630942	NA	NA	NA	15.2028	22.8983	34.0573	72.1585	NA	3	0	3
ENSMUSG00000038462	6735	ENSMUST00000042834	Uqcrfs1	protein_coding	cds	GCT	GAC	chr13	-	544	143	-131	30541127	30541125	NA	NA	NA	12.262	16.5276	15.4935	44.2831	NA	3	0	3
ENSMUSG00000038462	6738	ENSMUST00000042834	Uqcrfs1	protein_coding	cds	CCT	GTT	chr13	-	235	40	-234	30545128	30545126	NA	NA	NA	11.8328	10.5191	19.4149	41.7668	NA	3	0	3
ENSMUSG00000038510	1376	ENSMUST00000045114, ENSMUST00000183309	Rpf2	protein_coding	cds	GCA	GAG	chr10	-	1113	270.5	-18	40223798	40223796	NA	NA	NA	12.4215	20.0551	13.9941	46.4706	NA	3	0	3
ENSMUSG00000038526	14572	ENSMUST00000036181, ENSMUST00000147962	Car14	protein_coding	cds	GAT	CTG	chr3	-	502	51	-202.5	95901172	95901170	NA	NA	NA	11.179	30.6421	17.1033	58.9243	NA	3	0	3
ENSMUSG00000038762	10644	ENSMUST00000043757	Abcf1	protein_coding	cds	AAA	AAG	chr17	-	289	81.5	-755	35964008	35964006	NA	NA	NA	10.5841	10.2562	11.5909	32.4312	NA	3	0	3
ENSMUSG00000038900	12713	ENSMUST00000126610	Rpl12	protein_coding	cds	AAG	GGT	chr2	+	403	53	-112	32962621	32962623	NA	NA	NA	11.0354	19.4714	20.389	50.8957	NA	3	0	3
ENSMUSG00000038900	12714	ENSMUST00000102811	Rpl12	nonsense_mediated_decay	3utr	NA	NA	chr2	+	344	280	26	32962622	32962624	NA	NA	NA	17.1113	21.2613	24.8261	63.1987	NA	3	0	3
ENSMUSG00000038900	12739	ENSMUST00000102811	Rpl12	nonsense_mediated_decay	3utr	NA	NA	chr2	+	650	586	332	32963827	32963829	NA	NA	NA	11.9363	15.1395	18.9697	46.0455	NA	3	0	3
ENSMUSG00000039001	13896	ENSMUST00000059080	Rps21	protein_coding	cds	GAC	CAC	chr2	+	165	27	-56	180257818	180257820	NA	NA	NA	11.9025	37.1353	57.9443	106.982	NA	3	0	3
ENSMUSG00000039001	13900	ENSMUST00000059080	Rps21	protein_coding	cds	ATT	CTC	chr2	+	288	68	-15	180258247	180258249	NA	NA	NA	11.8306	41.108	52.8787	105.817	NA	3	0	3
ENSMUSG00000039041	13890	ENSMUST00000061437	Adrm1	protein_coding	cds	ATC	CTT	chr2	+	1102	298.5	-108	180175638	180175640	NA	NA	NA	10.4294	12.8749	34.1406	57.4448	NA	3	0	3
ENSMUSG00000039221	13999	ENSMUST00000043867, ENSMUST00000194649	Rpl22l1	protein_coding	cds	TCT	GAG	chr3	+	282	66	-55	28806835	28806837	NA	NA	NA	17.5741	29.1218	27.8852	74.5811	NA	3	0	3
ENSMUSG00000039630	1192	ENSMUST00000161769, ENSMUST00000037748	Hnrnpu	nonsense_mediated_decay, protein_coding	cds	CAG	AAA	chr1	-	2090.5	633	-163.5	178330788	178330786	NA	NA	NA	12.9503	14.0892	11.6087	38.6482	NA	3	0	3
ENSMUSG00000039630	1210	ENSMUST00000161769, ENSMUST00000037748	Hnrnpu	nonsense_mediated_decay, protein_coding	cds	GAT	ATA	chr1	-	1181.5	330	-466.5	178333602	178333600	NA	NA	NA	12.6014	34.2625	22.4571	69.321	NA	3	0	3
ENSMUSG00000039630	1216	ENSMUST00000161769, ENSMUST00000037748	Hnrnpu	nonsense_mediated_decay, protein_coding	cds	AAC	GGC	chr1	-	566.5	125	-671.5	178337197	178337195	NA	NA	NA	24.7958	28.9649	17.4957	71.2563	NA	3	0	3
ENSMUSG00000040354	2296	ENSMUST00000037290, ENSMUST00000171564	Mars1	protein_coding	cds	GGA	GAG	chr10	-	946	262.5	-643	127305845	127305843	NA	NA	NA	17.4632	39.3547	18.6125	75.4304	NA	3	0	3
ENSMUSG00000040459	20864	ENSMUST00000048545	Arglu1	protein_coding	cds	GAC	CGC	chr8	-	435	76.5	-194	8690103	8690101	NA	NA	NA	12.4085	14	16.5999	43.0084	NA	3	0	3
ENSMUSG00000041355	14389	ENSMUST00000193069, ENSMUST00000195014, ENSMUST00000035785	Ssr2	protein_coding	cds	TCA	TTG	chr3	+	348.5	26.75	-81.5	88579960	88579962	NA	NA	NA	13.4682	20.0876	13.4519	47.0077	NA	3	0	3
ENSMUSG00000041453	17722	ENSMUST00000035983, ENSMUST00000075453, ENSMUST00000099272	Rpl21	protein_coding	cds	GGC	ACT	chr5	+	544.667	45	-115	146834997	146834999	NA	NA	NA	10.7227	22.6035	11.2708	44.5971	NA	3	0	3
ENSMUSG00000042165	14505	ENSMUST00000192538, ENSMUST00000047300	Gm9774	protein_coding	cds	ATC	CTT	chr3	-	780	249.5	-108	92428497	92428495	NA	NA	NA	11.3538	12.8749	35.3499	59.5785	NA	3	0	3
ENSMUSG00000042750	24149	ENSMUST00000049130	Bex2	protein_coding	cds	AGG	GAA	chrX	-	564	100	-29	136066903	136066901	NA	NA	NA	14.9933	51.2525	17.8979	84.1436	NA	3	0	3
ENSMUSG00000043091	8947	ENSMUST00000058914	Tuba1c	protein_coding	cds	GAG	GAT	chr15	+	819	95.5	-353.5	99034510	99034512	NA	NA	NA	11.5703	25.3635	21.967	58.9008	NA	3	0	3
ENSMUSG00000043091	8979	ENSMUST00000058914	Tuba1c	protein_coding	cds	ATC	TCT	chr15	+	1356	275	-174	99037484	99037486	NA	NA	NA	14.8667	16.9334	12.0053	43.8054	NA	3	0	3
ENSMUSG00000043424	11275	ENSMUST00000057110	Eif3j2	protein_coding	cds	ATA	AAA	chr18	-	305	85	-178	43477492	43477490	NA	NA	NA	15.6408	40.0696	21.852	77.5624	NA	3	0	3
ENSMUSG00000043866	20188	ENSMUST00000141116	Taf10	protein_coding	cds	ATA	ATT	chr7	-	493	150	-68	105743430	105743428	NA	NA	NA	21.9629	31.8598	20.2073	74.03	NA	3	0	3
ENSMUSG00000044533	10021	ENSMUST00000054289, ENSMUST00000170715	Rps2	protein_coding	cds	CAG	GAA	chr17	+	917.5	266	-27	24721711	24721713	NA	NA	NA	13.0984	20.0201	28.3405	61.4591	NA	3	0	3
ENSMUSG00000044533	10024	ENSMUST00000054289, ENSMUST00000170715	Rps2	protein_coding	cds	GTG	AAA	chr17	+	938.5	273	-20	24721820	24721822	NA	NA	NA	19.7649	31.5239	17.5215	68.8103	NA	3	0	3
ENSMUSG00000044573	5233	ENSMUST00000062740	Acp1	protein_coding	cds	GGG	AAC	chr12	-	195	51.5	-106	30905071	30905069	NA	NA	NA	12.3744	13.7536	12.3874	38.5153	NA	3	0	3
ENSMUSG00000046434	9147	ENSMUST00000087351	Hnrnpa1	protein_coding	cds	CAT	ACT	chr15	+	561	167	-153	103242102	103242104	NA	NA	NA	12.7254	30.8933	17.4356	61.0542	NA	3	0	3
ENSMUSG00000046434	9149	ENSMUST00000036004	Hnrnpa1	protein_coding	cds	CAT	ACT	chr15	+	583	167	-206	103242216	103242218	NA	NA	NA	13.061	33.1795	15.5469	61.7874	NA	3	0	3
ENSMUSG00000046865	19474	ENSMUST00000042405	Fbl	protein_coding	cds	CAG	GAG	chr7	+	996	298.5	-28.5	28179019	28179021	NA	NA	NA	16.6287	13.568	15.9466	46.1433	NA	3	0	3
ENSMUSG00000047215	16707	ENSMUST00000118543, ENSMUST00000120094	Rpl9	protein_coding	cds	ACG, CTG	CTG, GGC	chr5	-	263.5	84.5	-94.5	65390391	65390389	NA	NA	NA	13.4872	20.3243	22.4246	56.2361	NA	3	0	3
ENSMUSG00000047215	16708	ENSMUST00000057885	Rpl9	protein_coding	cds	ACG	CTG	chr5	-	322	84	-108	65390393	65390391	NA	NA	NA	13.51	22.4325	17.1638	53.1063	NA	3	0	3
ENSMUSG00000047215	16709	ENSMUST00000120094	Rpl9	protein_coding	cds	ACG	CTG	chr5	-	258	84	-108	65390394	65390392	NA	NA	NA	13.6478	22.4495	17.314	53.4113	NA	3	0	3
ENSMUSG00000047215	16718	ENSMUST00000127874	Rpl9	protein_coding	cds	CTC	CGG	chr5	-	570	54	-54	65390480	65390478	NA	NA	NA	12.4821	33.6005	24.8301	70.9127	NA	3	0	3
ENSMUSG00000047215	16719	ENSMUST00000118543	Rpl9	protein_coding	cds	CTC	CGG	chr5	-	176	54	-112	65390481	65390479	NA	NA	NA	14.9226	34.9992	27.3104	77.2322	NA	3	0	3
ENSMUSG00000047215	16720	ENSMUST00000057885	Rpl9	protein_coding	cds	CTC	CGG	chr5	-	232	54	-138	65390483	65390481	NA	NA	NA	12.4213	29.6845	22.0504	64.1562	NA	3	0	3
ENSMUSG00000047215	16721	ENSMUST00000120094	Rpl9	protein_coding	cds	CTC	CGG	chr5	-	168	54	-138	65390483	65390739	NA	NA	NA	10.4887	27.8914	24.9331	63.3132	NA	3	0	3
ENSMUSG00000047215	16729	ENSMUST00000150815	Rpl9	nonsense_mediated_decay	cds	TCC	GGG	chr5	-	96	31.5	-34	65390805	65390803	NA	NA	NA	11.3266	28.992	25.6799	65.9984	NA	3	0	3
ENSMUSG00000047215	16730	ENSMUST00000127874	Rpl9	protein_coding	cds	CCC	AGG	chr5	-	495	29	-79	65390810	65390808	NA	NA	NA	14.428	22.9338	12.6864	50.0482	NA	3	0	3
ENSMUSG00000047215	16740	ENSMUST00000127874	Rpl9	protein_coding	cds	ACT	CTG	chr5	-	462	18	-90	65390843	65390841	NA	NA	NA	10.3243	15.1687	15.6827	41.1757	NA	3	0	3
ENSMUSG00000047246	6459	ENSMUST00000091704, ENSMUST00000051091	H2bc6	protein_coding	cds	TTC	GAG	chr13	-	416	69.5	-56.5	23585747	23585745	NA	NA	NA	12.3208	31.4553	11.3026	55.0787	NA	3	0	3
ENSMUSG00000050071	24167	ENSMUST00000058125, ENSMUST00000113120, ENSMUST00000113118	Bex1	protein_coding	cds	AGG	GAA	chrX	-	483.333	99	-29	136214282	136214280	NA	NA	NA	14.9933	47.6477	18.0571	80.6981	NA	3	0	3
ENSMUSG00000051579	24160	ENSMUST00000060101, ENSMUST00000163584	Tceal8	protein_coding	cds	CAA	AGA	chrX	-	619.5	101.5	-15	136170717	136170715	NA	NA	NA	14.9095	14.0542	14.5781	43.5417	NA	3	0	3
ENSMUSG00000052146	10128	ENSMUST00000114882	Rps10	protein_coding	cds	AAC	CTT	chr17	-	465	41	-124	27632287	27632285	NA	NA	NA	15.2441	12.1019	13.3167	40.6627	NA	3	0	3
ENSMUSG00000052146	10166	ENSMUST00000114881	Rps10	protein_coding	cds	AAC	CTT	chr17	-	228	41	-124	27634231	27634229	NA	NA	NA	14.8731	11.4956	14.7513	41.12	NA	3	0	3
ENSMUSG00000052146	10173	ENSMUST00000025052, ENSMUST00000178774, ENSMUST00000152982	Rps10	protein_coding	cds	AAC	CTT	chr17	-	382.75	40.75	-91.75	27634353	27634351	NA	NA	NA	17.8212	12.2362	14.0944	44.1518	NA	3	0	3
ENSMUSG00000052146	10179	ENSMUST00000155071	Rps10	protein_coding	cds	AAC	CTT	chr17	-	148	41	-128	27634401	27634399	NA	NA	NA	16.5576	12.6493	12.6855	41.8924	NA	3	0	3
ENSMUSG00000052217	20153	ENSMUST00000063957	Hbb-bh1	protein_coding	cds	AAG	GAG	chr7	-	300	81.5	-65	103842760	103842758	NA	NA	NA	10.0708	31.2535	11.0972	52.4215	NA	3	0	3
ENSMUSG00000052926	21298	ENSMUST00000109738, ENSMUST00000147812, ENSMUST00000109736	Rnaseh2a	protein_coding	cds	TCA	GAA	chr8	-	1290	256.5	-44	84957858	84957856	NA	NA	NA	10.9159	21.2864	33.6625	65.8648	NA	3	0	3
ENSMUSG00000053110	21787	ENSMUST00000086580, ENSMUST00000065353, ENSMUST00000173264, ENSMUST00000173085, ENSMUST00000174577	Yap1	protein_coding, nonsense_mediated_decay	cds	CCT	GAG	chr9	-	329.8	82.5	-324.8	8004142	8004140	NA	NA	NA	24.4905	28.752	37.241	90.4834	NA	3	0	3
ENSMUSG00000053931	14986	ENSMUST00000029773	Cnn3	protein_coding	cds	AAC	GAC	chr3	+	593	106	-224	121451498	121451500	NA	NA	NA	23.4579	33.16	11.2641	67.882	NA	3	0	3
ENSMUSG00000053931	14989	ENSMUST00000029773	Cnn3	protein_coding	cds	TTT	GAC	chr3	+	869	198	-132	121455083	121455085	NA	NA	NA	12.4373	21.4662	25.5	59.4036	NA	3	0	3
ENSMUSG00000054766	12661	ENSMUST00000134364, ENSMUST00000149578, ENSMUST00000102866, ENSMUST00000067996	Set	protein_coding	cds	AGA	ATA	chr2	+	644.5	131	-101.75	30069418	30069420	NA	NA	NA	18.9793	29.7419	57.2037	105.925	NA	3	0	3
ENSMUSG00000054766	12674	ENSMUST00000102866, ENSMUST00000067996	Set	protein_coding	cds	TGG	CCA	chr2	+	996	218	-65	30070328	30070330	NA	NA	NA	12.3947	27.5733	21.442	61.4101	NA	3	0	3
ENSMUSG00000055653	23710	ENSMUST00000069360, ENSMUST00000114857	Gpc3	protein_coding	cds	AAC	ACT	chrX	-	848.5	239	-265.5	52428752	52428750	NA	NA	NA	14.8205	17.359	13.0942	45.2737	NA	3	0	3
ENSMUSG00000056305	18261	ENSMUST00000070345	Usp39	protein_coding	cds	CCT	CTT	chr6	-	773	245.5	-318	72336468	72336466	NA	NA	NA	22.0045	14.0373	10.9697	47.0114	NA	3	0	3
ENSMUSG00000057113	2930	ENSMUST00000101375, ENSMUST00000075641, ENSMUST00000093201, ENSMUST00000109354	Npm1	protein_coding	cds	CCT	AGT	chr11	-	821.75	231	-43.5	33156054	33156052	NA	NA	NA	10.0778	37.0607	25.4419	72.5805	NA	3	0	3
ENSMUSG00000057113	2953	ENSMUST00000101375, ENSMUST00000075641, ENSMUST00000093201, ENSMUST00000109354	Npm1	protein_coding	cds	GGC	AGT	chr11	-	332.75	68	-206.5	33161160	33161158	NA	NA	NA	10.471	47.2944	27.875	85.6404	NA	3	0	3
ENSMUSG00000057113	2960	ENSMUST00000101375, ENSMUST00000075641, ENSMUST00000093201, ENSMUST00000109354	Npm1	protein_coding	cds	AAT	GAT	chr11	-	230.75	34	-240.5	33161584	33161582	NA	NA	NA	10.471	36.1929	29.1219	75.7858	NA	3	0	3
ENSMUSG00000057130	11563	ENSMUST00000145963	Txnl4a	protein_coding	cds	TAC	AGA	chr18	+	561	139	-3	80222338	80222340	NA	NA	NA	15.6304	15.0915	13.5962	44.3181	NA	3	0	3
ENSMUSG00000057666	18812	ENSMUST00000183272, ENSMUST00000073605, ENSMUST00000117757, ENSMUST00000118875	Gapdh	protein_coding	cds	CTC	ATG	chr6	-	597.5	166.75	-159.25	125162849	125162847	NA	NA	NA	14.052	15.8144	10.5611	40.4275	NA	3	0	3
ENSMUSG00000057666	18813	ENSMUST00000117757, ENSMUST00000118875, ENSMUST00000183272, ENSMUST00000073605	Gapdh	protein_coding	cds	GTG	GAA	chr6	-	588.5	163.75	-162.25	125162858	125162856	NA	NA	NA	14.6574	32.7866	19.4362	66.8802	NA	3	0	3
ENSMUSG00000057666	18832	ENSMUST00000182052, ENSMUST00000117757, ENSMUST00000118875, ENSMUST00000183272, ENSMUST00000073605	Gapdh	protein_coding	cds	GGT	GAG	chr6	-	359.8	73.6	-198	125163205	125163203	NA	NA	NA	12.2151	18.5119	15.6846	46.4116	NA	3	0	3
ENSMUSG00000057666	18845	ENSMUST00000182052	Gapdh	protein_coding	5utr	NA	NA	chr6	-	293	-14	-178	125163353	125163351	NA	NA	NA	12.9173	38.1891	82.8292	133.936	NA	3	0	3
ENSMUSG00000058385	6360	ENSMUST00000079251	H2bc8	protein_coding	cds	TTC	GAG	chr13	+	247	69.5	-56.5	23571654	23571656	NA	NA	NA	12.3208	31.4553	11.3026	55.0787	NA	3	0	3
ENSMUSG00000058443	22211	ENSMUST00000076364	Rpl10-ps3	protein_coding	cds	CTC	CAC	chr9	-	297	90	-124	50344685	50344683	NA	NA	NA	11.9201	29.0982	27.6621	68.6805	NA	3	0	3
ENSMUSG00000058443	22219	ENSMUST00000076364	Rpl10-ps3	protein_coding	cds	GGA	CGG	chr9	-	135	36	-178	50344847	50344845	NA	NA	NA	10.597	31.1333	20.8058	62.5361	NA	3	0	3
ENSMUSG00000058558	17034	ENSMUST00000082223, ENSMUST00000153590	Rpl5	protein_coding	cds	GTG	GCA	chr5	+	777.5	178	-51.5	107904798	107904800	NA	NA	NA	11.4986	15.8178	21.5968	48.9132	NA	3	0	3
ENSMUSG00000058600	8175	ENSMUST00000142643, ENSMUST00000079735, ENSMUST00000009039	Rpl30	protein_coding	cds	ACT	GGG	chr15	-	461.333	60.5	-47.5	34441326	34441324	NA	NA	NA	14.9592	31.5956	21.7241	68.279	NA	3	0	3
ENSMUSG00000058655	9060	ENSMUST00000169681	Eif4b	protein_coding	cds	CCT	AAA	chr15	+	1570	464	-147	102093071	102093073	NA	NA	NA	16.3201	22.7522	20.2073	59.2795	NA	3	0	3
ENSMUSG00000058655	9061	ENSMUST00000169681	Eif4b	protein_coding	cds	CAG	CCG	chr15	+	1681	500.5	-110.5	102093182	102093184	NA	NA	NA	10.2062	30.1333	15.9166	56.2561	NA	3	0	3
ENSMUSG00000058773	5954	ENSMUST00000080511	H1f5	protein_coding	cds	CCT	GCG	chr13	-	545	158	-65	21780081	21780079	NA	NA	NA	11.179	16.832	10.3333	38.3443	NA	3	0	3
ENSMUSG00000059005	12980	ENSMUST00000111964, ENSMUST00000111962, ENSMUST00000141974, ENSMUST00000164947, ENSMUST00000090792, ENSMUST00000111961	Hnrnpa3	protein_coding	cds	CCC	ATG	chr2	+	914.333	296.167	-34	75665098	75665100	NA	NA	NA	11.1787	24.6621	13.1591	48.9998	NA	3	0	3
ENSMUSG00000059040	11315	ENSMUST00000076155	Eno1b	protein_coding	cds	GTT	TAC	chr18	+	696	186.5	-247.5	48047317	48047319	NA	NA	NA	14.7642	28.6742	36.8065	80.2449	NA	3	0	3
ENSMUSG00000059040	11344	ENSMUST00000076155	Eno1b	protein_coding	cds	CCC	CTG	chr18	+	1425	430	-4	48048046	48048048	NA	NA	NA	13.4663	21.715	20.2725	55.4538	NA	3	0	3
ENSMUSG00000059070	19881	ENSMUST00000072503	Rpl18	protein_coding	cds	CTG	GCC	chr7	+	441	125	-63	45720371	45720373	NA	NA	NA	11.1793	21.4307	22.6686	55.2786	NA	3	0	3
ENSMUSG00000059070	19886	ENSMUST00000072503	Rpl18	protein_coding	cds	TTT	GAG	chr7	+	585	173	-15	45720741	45720743	NA	NA	NA	10.0461	41.1435	48.3942	99.5839	NA	3	0	3
ENSMUSG00000059208	10341	ENSMUST00000130946, ENSMUST00000114385, ENSMUST00000139302	Hnrnpm	protein_coding	3utr	NA	NA	chr17	-	1607.33	1599	221.667	33646500	33646498	NA	NA	NA	13.6739	30.6253	10.4659	54.7651	NA	3	0	3
ENSMUSG00000059291	16181	ENSMUST00000102536	Rpl11	protein_coding	cds	ATC	ATC	chr4	-	556	172	-6	136050008	136050006	NA	NA	NA	17.5906	40.3852	38.2631	96.239	NA	3	0	3
ENSMUSG00000059291	16188	ENSMUST00000102536, ENSMUST00000155873	Rpl11	protein_coding	cds	GGC	CTG	chr4	-	455.5	127.5	-47	136051189	136051187	NA	NA	NA	14.0555	22.6962	14.5972	51.349	NA	3	0	3
ENSMUSG00000059291	16199	ENSMUST00000102536, ENSMUST00000155873	Rpl11	protein_coding	cds	CAC	TGC	chr4	-	287.5	71.5	-103	136051668	136051666	NA	NA	NA	13.1452	11.2872	11.0167	35.4492	NA	3	0	3
ENSMUSG00000059796	3462	ENSMUST00000102589	Eif4a1	nonsense_mediated_decay	3utr	NA	NA	chr11	-	765	718	566	69668530	69668528	NA	NA	NA	14.5455	15.5075	13.5558	43.6087	NA	3	0	3
ENSMUSG00000059796	3463	ENSMUST00000163666	Eif4a1	protein_coding	cds	ACA	ATG	chr11	-	658	214	-192	69668531	69668529	NA	NA	NA	14.8604	15.7403	12.6667	43.2674	NA	3	0	3
ENSMUSG00000059796	3464	ENSMUST00000102589	Eif4a1	nonsense_mediated_decay	3utr	NA	NA	chr11	-	754	707	555	69668541	69668539	NA	NA	NA	17.5608	41.1856	18.9118	77.6583	NA	3	0	3
ENSMUSG00000059796	3518	ENSMUST00000102589	Eif4a1	nonsense_mediated_decay	3utr	NA	NA	chr11	-	333	286	134	69670267	69670265	NA	NA	NA	11.0963	34.2694	28.8969	74.2626	NA	3	0	3
ENSMUSG00000060126	7904	ENSMUST00000110894, ENSMUST00000142061	Tpt1	protein_coding	cds	GTA	AAG	chr14	+	524.5	93	-62	75846730	75846732	NA	NA	NA	14.162	25.7031	12.6436	52.5087	NA	3	0	3
ENSMUSG00000060377	7930	ENSMUST00000081987	Rpl36a-ps1	protein_coding	cds	GGC	CAA	chr14	-	318	100	-6	98993983	98993981	NA	NA	NA	15.0153	27.8426	19.4286	62.2865	NA	3	0	3
ENSMUSG00000060743	1243	ENSMUST00000161308, ENSMUST00000081026, ENSMUST00000162814, ENSMUST00000159789	H3f3a	protein_coding	cds	AAT	CTG	chr1	-	490.5	107.75	-23.5	180803164	180803162	NA	NA	NA	15.3218	12.0073	17.5828	44.9118	NA	3	0	3
ENSMUSG00000060938	3404	ENSMUST00000073471, ENSMUST00000101014, ENSMUST00000128952, ENSMUST00000167436	Rpl26	protein_coding	cds	TCT	ATG	chr11	+	278.5	44.5	-89.25	68902409	68902411	NA	NA	NA	11.2893	17.6398	13.8862	42.8153	NA	3	0	3
ENSMUSG00000060938	3408	ENSMUST00000073471, ENSMUST00000101014, ENSMUST00000128952, ENSMUST00000167436	Rpl26	protein_coding	cds	ATC	GAA	chr11	+	385	80.5	-53.25	68903253	68903255	NA	NA	NA	10.5227	21.32	31.8294	63.6722	NA	3	0	3
ENSMUSG00000060938	3415	ENSMUST00000073471, ENSMUST00000101014, ENSMUST00000167436	Rpl26	protein_coding	cds	AGG	AAA	chr11	+	485.667	119.333	-25	68904415	68904417	NA	NA	NA	15.5389	23.8998	13.8122	53.2509	NA	3	0	3
ENSMUSG00000061024	30	ENSMUST00000072079	Rrs1	protein_coding	cds	GAT	GAC	chr1	+	566	149.5	-215	9545973	9545975	NA	NA	NA	10.3023	36.1741	47.057	93.5334	NA	3	0	3
ENSMUSG00000061111	4840	ENSMUST00000034913	Mcrip1	protein_coding	cds	TGG	CAG	chr11	-	244	42	-54.5	120544004	120544002	NA	NA	NA	10.7998	16.6039	12.2902	39.6939	NA	3	0	3
ENSMUSG00000061482	6436	ENSMUST00000102968	H4c4	protein_coding	cds	ACC	CGT	chr13	+	166	54	-49	23581763	23581765	NA	NA	NA	10.5691	34.8717	44.3571	89.7979	NA	3	0	3
ENSMUSG00000061518	156	ENSMUST00000193210	Cox5b	protein_coding	cds	CCA	AAG	chr1	+	301	66	-63	36692471	36692473	NA	NA	NA	11.6172	12.372	10.8594	34.8487	NA	3	0	3
ENSMUSG00000061518	171	ENSMUST00000081180	Cox5b	protein_coding	cds	CAA	AGG	chr1	+	357	72.5	-12	36693357	36693359	NA	NA	NA	13.6517	12.8256	10.8594	37.3367	NA	3	0	3
ENSMUSG00000061613	10337	ENSMUST00000014684	U2af1	protein_coding	cds	ACC	GAA	chr17	-	226	10	-229	31651677	31651675	NA	NA	NA	13.2791	23.0031	34.8946	71.1767	NA	3	0	3
ENSMUSG00000061613	10339	ENSMUST00000166526	U2af1	protein_coding	cds	ACC	GAA	chr17	-	103	10	-229	31655066	31655064	NA	NA	NA	14.0382	24.317	34.8946	73.2498	NA	3	0	3
ENSMUSG00000061787	19982	ENSMUST00000080813	Rps17	protein_coding	cds	GTC	ACG	chr7	-	209	53	-82	81344413	81344411	NA	NA	NA	15.6769	23.9337	20.9154	60.526	NA	3	0	3
ENSMUSG00000061983	1337	ENSMUST00000073926	Rps12	protein_coding	cds	GAG	GAA	chr10	-	457	128.5	-8	23785230	23785228	NA	NA	NA	15.9632	41.6297	56.9388	114.532	NA	3	0	3
ENSMUSG00000061983	1351	ENSMUST00000073926	Rps12	protein_coding	5utr	NA	NA	chr10	-	57	-14	-427	23787028	23787026	NA	NA	NA	18.9186	36.0331	16.335	71.2868	NA	3	0	3
ENSMUSG00000062270	22873	ENSMUST00000191189, ENSMUST00000191353, ENSMUST00000085248, ENSMUST00000169860	Morf4l1	protein_coding	cds	AAT	TTG	chr9	-	409.75	87.25	-200.75	90102338	90102336	NA	NA	NA	12.046	13.0192	10.0779	35.1431	NA	3	0	3
ENSMUSG00000062270	22880	ENSMUST00000085248, ENSMUST00000169860, ENSMUST00000191189, ENSMUST00000191353	Morf4l1	protein_coding	cds	CTT	CTC	chr9	-	217	23	-265	90110144	90110142	NA	NA	NA	10.16	20.0478	28.4019	58.6097	NA	3	0	3
ENSMUSG00000062328	11495	ENSMUST00000079716	Rpl17	protein_coding	cds	TAT	CTG	chr18	+	218	45.5	-138	75001722	75001724	NA	NA	NA	11.9004	33.6935	68.811	114.405	NA	3	0	3
ENSMUSG00000062328	11506	ENSMUST00000079716	Rpl17	protein_coding	cds	CCA	GAA	chr18	+	557	159	-25	75002822	75002824	NA	NA	NA	10.667	15.1248	11.3263	37.1181	NA	3	0	3
ENSMUSG00000062456	12138	ENSMUST00000078034	Rpl9-ps6	protein_coding	cds	CTC	CGG	chr19	-	189	54	-138	32466387	32466385	NA	NA	NA	13.2427	27.8496	23.4453	64.5376	NA	3	0	3
ENSMUSG00000062647	12575	ENSMUST00000102898	Rpl7a	protein_coding	cds	CCC	AAG	chr2	+	169	35	-231	26911107	26911109	NA	NA	NA	14.4226	21.5872	10.7539	46.7638	NA	3	0	3
ENSMUSG00000062647	12581	ENSMUST00000102898	Rpl7a	protein_coding	cds	AAA	TGG	chr2	+	229	54.5	-211.5	26911462	26911464	NA	NA	NA	11.6791	13.0736	21.2629	46.0156	NA	3	0	3
ENSMUSG00000062825	4788	ENSMUST00000131103	Actg1	nonsense_mediated_decay	3utr	NA	NA	chr11	-	684	612	214	120347145	120347143	NA	NA	NA	14.6816	44.0376	21.7888	80.5079	NA	3	0	3
ENSMUSG00000062825	4811	ENSMUST00000131103	Actg1	nonsense_mediated_decay	3utr	NA	NA	chr11	-	495	423	25	120347334	120347332	NA	NA	NA	11.0145	24.0472	10.4678	45.5294	NA	3	0	3
ENSMUSG00000062981	2138	ENSMUST00000075829	Mrpl42	protein_coding	cds	GAT	GAC	chr10	-	228	39	-103	95496838	95496836	NA	NA	NA	12.7077	13.064	18.9877	44.7593	NA	3	0	3
ENSMUSG00000062997	12834	ENSMUST00000080861	Rpl35	protein_coding	cds	CAA	AAA	chr2	-	730	64	-59	39004137	39004135	NA	NA	NA	11.1249	26.8507	13.5297	51.5052	NA	3	0	3
ENSMUSG00000063021	5927	ENSMUST00000074752	H2ac15	protein_coding	cds	ATT	ATC	chr13	-	234	78	-52	21753594	21753592	NA	NA	NA	16.5864	38.1037	11.9821	66.6721	NA	3	0	3
ENSMUSG00000063129	5339	ENSMUST00000080123	Aldoart2	protein_coding	cds	ACC	CCG	chr12	+	77	8	-356	55565315	55565317	NA	NA	NA	10.4831	14.9755	32.9122	58.3708	NA	3	0	3
ENSMUSG00000063229	19901	ENSMUST00000147535, ENSMUST00000048209, ENSMUST00000092621, ENSMUST00000005051, ENSMUST00000132157	Ldha	protein_coding	cds	CAC	TGC	chr7	+	572.2	129	-133.4	46850320	46850322	NA	NA	NA	10.575	16.8479	14.3696	41.7925	NA	3	0	3
ENSMUSG00000063229	19924	ENSMUST00000048209, ENSMUST00000005051	Ldha	protein_coding	cds	GAG	GAA	chr7	+	1122.5	310	-22	46855072	46855074	NA	NA	NA	12.0909	54.5186	86.8205	153.43	NA	3	0	3
ENSMUSG00000063273	14113	ENSMUST00000193266, ENSMUST00000029303	Naa15	protein_coding	cds	GGT	GAA	chr3	+	2244	476	-364	51458714	51458716	NA	NA	NA	12.3742	24.5919	30.2525	67.2185	NA	3	0	3
ENSMUSG00000063358	9297	ENSMUST00000069107, ENSMUST00000115731	Mapk1	protein_coding	cds	CCA	TGG	chr16	+	965.5	270.5	-87	17026452	17026454	NA	NA	NA	12.4539	18.7973	23.0999	54.3511	NA	3	0	3
ENSMUSG00000063457	1781	ENSMUST00000068408, ENSMUST00000062674	Rps15	protein_coding	cds	GAG	GTG	chr10	+	296.5	59.5	-72	80293771	80293773	NA	NA	NA	10.8563	25.7486	23.3829	59.9878	NA	3	0	3
ENSMUSG00000063480	8662	ENSMUST00000080622	Snu13	protein_coding	cds	TCC	AAG	chr15	-	361	83.5	-44.5	82042241	82042239	NA	NA	NA	14.2378	31.3305	16.617	62.1854	NA	3	0	3
ENSMUSG00000063511	19845	ENSMUST00000074575	Snrnp70	protein_coding	cds	CTG	GAA	chr7	-	316	24	-424	45394684	45394682	NA	NA	NA	15.4323	23.4743	15.1667	54.0732	NA	3	0	3
ENSMUSG00000063524	16358	ENSMUST00000080926, ENSMUST00000080149	Eno1	protein_coding	cds	CAG	CTG	chr4	+	1160.5	240	-160	150246724	150246726	NA	NA	NA	12.7262	13.3933	11.717	37.8365	NA	3	0	3
ENSMUSG00000063524	16377	ENSMUST00000080926, ENSMUST00000080149	Eno1	protein_coding	cds	CCC	CTG	chr4	+	1628.5	396	-4	150248540	150248542	NA	NA	NA	11.7237	20.2131	19.0903	51.0271	NA	3	0	3
ENSMUSG00000063954	14660	ENSMUST00000074976	H2ac19	protein_coding	cds	GGC	AAA	chr3	-	320	98	-32	96239957	96239955	NA	NA	NA	12.8175	30.0704	42.1613	85.0492	NA	3	0	3
ENSMUSG00000064220	14693	ENSMUST00000078756	H2ac18	protein_coding	cds	GGC	AAA	chr3	+	378	98	-32	96245874	96245876	NA	NA	NA	12.8175	30.0704	42.1613	85.0492	NA	3	0	3
ENSMUSG00000064341	23332	ENSMUST00000082392	mt-Nd1	protein_coding	cds	CCA	ATA	chrMT	+	177	59	-259	2927	2929	NA	NA	NA	17.5897	10.7716	18.1238	46.4852	NA	3	0	3
ENSMUSG00000064341	23333	ENSMUST00000082392	mt-Nd1	protein_coding	cds	ATA	CGC	chrMT	+	180	60	-258	2930	2932	NA	NA	NA	11.6288	30.8864	23.5162	66.0315	NA	3	0	3
ENSMUSG00000064341	23337	ENSMUST00000082392	mt-Nd1	protein_coding	cds	ACC	ATA	chrMT	+	432	144	-174	3182	3184	NA	NA	NA	11.3112	14.986	12.6769	38.9742	NA	3	0	3
ENSMUSG00000064345	23351	ENSMUST00000082396	mt-Nd2	protein_coding	cds	ATA	CTA	chrMT	+	465	155	-190	4378	4380	NA	NA	NA	27.5196	36.8488	13.0481	77.4165	NA	3	0	3
ENSMUSG00000064345	23353	ENSMUST00000082396	mt-Nd2	protein_coding	cds	CCT	ATA	chrMT	+	639	213	-132	4552	4554	NA	NA	NA	12.6296	14.5178	17.3205	44.4679	NA	3	0	3
ENSMUSG00000064351	23372	ENSMUST00000082402	mt-Co1	protein_coding	cds	ATA	ACA	chrMT	+	525	175	-339	5852	5854	NA	NA	NA	20.0005	20.8013	22.1994	63.0012	NA	3	0	3
ENSMUSG00000064351	23376	ENSMUST00000082402	mt-Co1	protein_coding	cds	ATA	GGA	chrMT	+	810	270	-244	6137	6139	NA	NA	NA	17.1179	10.9436	17.7502	45.8117	NA	3	0	3
ENSMUSG00000064351	23396	ENSMUST00000082402	mt-Co1	protein_coding	cds	ATA	GGA	chrMT	+	1365	455	-59	6692	6694	NA	NA	NA	16.8846	14.0039	22.3773	53.2658	NA	3	0	3
ENSMUSG00000064354	23410	ENSMUST00000082405	mt-Co2	protein_coding	cds	ATA	TTA	chrMT	+	132	44	-183	7144	7146	NA	NA	NA	25.473	60.75	32.5579	118.781	NA	3	0	3
ENSMUSG00000064354	23414	ENSMUST00000082405	mt-Co2	protein_coding	cds	ATA	ATT	chrMT	+	222	74	-153	7234	7236	NA	NA	NA	20.1599	12.5125	11.0165	43.6889	NA	3	0	3
ENSMUSG00000064354	23415	ENSMUST00000082405	mt-Co2	protein_coding	cds	ATT	GCT	chrMT	+	225	75	-152	7237	7239	NA	NA	NA	16.2641	15.8047	12.8482	44.9171	NA	3	0	3
ENSMUSG00000064363	23484	ENSMUST00000082414	mt-Nd4	protein_coding	cds	TGA	GGG	chrMT	+	405	134.5	-323.5	10571	10573	NA	NA	NA	12.9991	12.9431	14.8505	40.7928	NA	3	0	3
ENSMUSG00000064363	23493	ENSMUST00000082414	mt-Nd4	protein_coding	cds	ATA	ATC	chrMT	+	903	301	-157	11069	11071	NA	NA	NA	12.1447	30.9137	16.0727	59.1311	NA	3	0	3
ENSMUSG00000064367	23500	ENSMUST00000082418	mt-Nd5	protein_coding	cds	ATA	TCA	chrMT	+	66	22	-585	11807	11809	NA	NA	NA	15.792	56.6947	20.5915	93.0782	NA	3	0	3
ENSMUSG00000064367	23507	ENSMUST00000082418	mt-Nd5	protein_coding	cds	AAC	ATA	chrMT	+	405	135	-472	12146	12148	NA	NA	NA	15.9299	15.4303	38.789	70.1492	NA	3	0	3
ENSMUSG00000064367	23527	ENSMUST00000082418	mt-Nd5	protein_coding	cds	ATA	CCA	chrMT	+	1443	481	-126	13184	13186	NA	NA	NA	15.6159	17.0948	13.8283	46.539	NA	3	0	3
ENSMUSG00000064367	23529	ENSMUST00000082418	mt-Nd5	protein_coding	cds	ATA	TCA	chrMT	+	1764	588	-19	13505	13507	NA	NA	NA	13.4195	15.3171	13.4289	42.1655	NA	3	0	3
ENSMUSG00000064370	23554	ENSMUST00000082421	mt-Cytb	protein_coding	cds	ATA	CCT	chrMT	+	909	303	-77	15053	15055	NA	NA	NA	20.0546	20.7515	30.6123	71.4184	NA	3	0	3
ENSMUSG00000064370	23556	ENSMUST00000082421	mt-Cytb	protein_coding	cds	ATA	TTC	chrMT	+	945	315	-65	15089	15091	NA	NA	NA	14.6588	20.2987	22.9131	57.8706	NA	3	0	3
ENSMUSG00000066232	20248	ENSMUST00000084731	Ipo7	protein_coding	cds	GCT	GAA	chr7	+	1015	288	-750	110042089	110042091	NA	NA	NA	10.681	15.2911	22.6154	48.5874	NA	3	0	3
ENSMUSG00000066551	17763	ENSMUST00000139443, ENSMUST00000085546, ENSMUST00000110505, ENSMUST00000093196	Hmgb1	protein_coding	cds	GCT	GCC	chr5	-	740	147	-57	149049757	149049755	NA	NA	NA	10.7367	10.22	12.1176	33.0743	NA	3	0	3
ENSMUSG00000066705	22132	ENSMUST00000085939	Fxyd6	protein_coding	cds	CCC	AGG	chr9	+	510	66	-27	45391592	45391594	NA	NA	NA	12.415	18.5722	14.9926	45.9798	NA	3	0	3
ENSMUSG00000068039	9872	ENSMUST00000151287, ENSMUST00000143961	Tcp1	protein_coding	cds	GGT	GAT	chr17	+	302.5	49	-280.5	12917880	12917882	NA	NA	NA	12.5757	24.5927	27.1074	64.2758	NA	3	0	3
ENSMUSG00000068039	9879	ENSMUST00000089024, ENSMUST00000151287	Tcp1	protein_coding	cds	GAT	GAT	chr17	+	1043.5	267.5	-264	12922181	12922183	NA	NA	NA	10.1107	26.7148	27.5684	64.3939	NA	3	0	3
ENSMUSG00000068039	9887	ENSMUST00000089024, ENSMUST00000151287	Tcp1	protein_coding	cds	CAC	AAT	chr17	+	1577.5	445.5	-86	12923649	12923651	NA	NA	NA	13.9797	29.028	16.7982	59.806	NA	3	0	3
ENSMUSG00000068417	7659	ENSMUST00000095925	Pnp2	protein_coding	cds	TAT	GAC	chr14	+	721	180	-125	50963712	50963714	NA	NA	NA	13.8623	19.5434	13.1762	46.5819	NA	3	0	3
ENSMUSG00000068739	14965	ENSMUST00000090553, ENSMUST00000102625	Sars	protein_coding	cds	TTT	GAA	chr3	-	588.5	178.5	-345.5	108433072	108433070	NA	NA	NA	10.3783	30.9484	25.7555	67.0822	NA	3	0	3
ENSMUSG00000068749	14957	ENSMUST00000090569	Psma5	protein_coding	cds	GGT	CAG	chr3	+	1017	222	-19	108279752	108279754	NA	NA	NA	10.0336	11.8092	10.7103	32.5532	NA	3	0	3
ENSMUSG00000068823	14839	ENSMUST00000029446	Csde1	protein_coding	5utr	NA	NA	chr3	+	274	-395	-2791	103028938	103028940	NA	NA	NA	19.0195	46.7639	23.7122	89.4956	NA	3	0	3
ENSMUSG00000068855	14604	ENSMUST00000090782	H2ac20	protein_coding	cds	GGC	AAA	chr3	-	330	98	-31	96220551	96220549	NA	NA	NA	11.6413	25.9752	31.7592	69.3756	NA	3	0	3
ENSMUSG00000068856	14584	ENSMUST00000076372	Sf3b4	protein_coding	cds	GAC	ACA	chr3	+	650	135.5	-288.5	96173785	96173787	NA	NA	NA	11.9928	33.1691	12.9167	58.0786	NA	3	0	3
ENSMUSG00000069273	6321	ENSMUST00000105107	H3c6	protein_coding	cds	GAC	ATC	chr13	-	373	123	-13	23561997	23561995	NA	NA	NA	17.6222	18.7657	19.7067	56.0946	NA	3	0	3
ENSMUSG00000069273	6341	ENSMUST00000105107	H3c6	protein_coding	cds	CGC	TAC	chr13	-	124	40	-96	23562246	23562244	NA	NA	NA	15.3095	30.1111	32.7505	78.1711	NA	3	0	3
ENSMUSG00000069305	6084	ENSMUST00000102979	Hist1h4n	protein_coding	cds	ATG	GAC	chr13	-	290	84	-19	21831907	21831905	NA	NA	NA	15.9878	25.2708	15.7588	57.0174	NA	3	0	3
ENSMUSG00000069306	6071	ENSMUST00000104941	Hist1h4m	protein_coding	cds	ATG	GAC	chr13	+	290	84	-19	21812035	21812037	NA	NA	NA	16.5558	25.2708	15.7588	57.5854	NA	3	0	3
ENSMUSG00000069308	6016	ENSMUST00000110473, ENSMUST00000102982	Hist1h2bp	protein_coding	cds	CGC	AAG	chr13	+	117.5	29	-103	21787601	21787603	NA	NA	NA	15.4915	11.4525	16.6312	43.5752	NA	3	0	3
ENSMUSG00000070436	20032	ENSMUST00000094154	Serpinh1	protein_coding	cds	GAC	AAG	chr7	-	1217	329	-88	99346422	99346420	NA	NA	NA	10.2886	27.136	19.5959	57.0206	NA	3	0	3
ENSMUSG00000070436	20036	ENSMUST00000169437	Serpinh1	protein_coding	cds	GAC	AAG	chr7	-	1263	329	-88	99347005	99347003	NA	NA	NA	10.2772	27.136	19.5959	57.0092	NA	3	0	3
ENSMUSG00000070436	20043	ENSMUST00000094154	Serpinh1	protein_coding	cds	GAT	GAG	chr7	-	857	209	-208	99348830	99348828	NA	NA	NA	10.5237	11.1811	10.8058	32.5105	NA	3	0	3
ENSMUSG00000070436	20047	ENSMUST00000169437	Serpinh1	protein_coding	cds	GAT	GAG	chr7	-	903	209	-208	99348911	99348909	NA	NA	NA	10.5237	11.1811	10.8058	32.5105	NA	3	0	3
ENSMUSG00000071014	15263	ENSMUST00000095128, ENSMUST00000108108	Ndufb6	protein_coding	cds	TTT	TTG	chr4	-	225	49	-63.5	40279191	40279189	NA	NA	NA	12.9365	16.0536	14.1416	43.1317	NA	3	0	3
ENSMUSG00000071072	2377	ENSMUST00000052798	Ptges3	protein_coding	cds	GAT	GAC	chr10	+	661	110	-50	128072112	128072114	NA	NA	NA	13.9645	21.737	10.1036	45.805	NA	3	0	3
ENSMUSG00000071415	4180	ENSMUST00000103146	Rpl23	protein_coding	cds	GAC	TTG	chr11	-	459	126	-14	97778127	97778125	NA	NA	NA	10.2682	19.1491	28.9857	58.403	NA	3	0	3
ENSMUSG00000071415	4189	ENSMUST00000103146	Rpl23	protein_coding	cds	GGC	AAA	chr11	-	282	67	-73	97781359	97781357	NA	NA	NA	13.3214	57.8438	46.3182	117.483	NA	3	0	3
ENSMUSG00000071547	7500	ENSMUST00000090212	Nt5dc2	protein_coding	5utr	NA	NA	chr14	+	102	-54	-1226	31135060	31135062	NA	NA	NA	20.6714	17.7028	17.9798	56.3539	NA	3	0	3
ENSMUSG00000071662	11901	ENSMUST00000096261	Polr2g	protein_coding	cds	ATG	GAC	chr19	-	596	163	-9	8793401	8793399	NA	NA	NA	13.7642	21.9766	34.3333	70.0741	NA	3	0	3
ENSMUSG00000071708	24301	ENSMUST00000112529	Sms	protein_coding	cds	GAA	GAA	chrX	-	1192	286	-80	157456001	157455999	NA	NA	NA	13.5105	28.9183	26.935	69.3638	NA	3	0	3
ENSMUSG00000071866	2612	ENSMUST00000132846	Ppia	protein_coding	cds	TTT	GCA	chr11	+	540	24	-140	6418103	6418105	NA	NA	NA	10.0464	15.7547	15.359	41.16	NA	3	0	3
ENSMUSG00000071866	2618	ENSMUST00000090749	Ppia	nonsense_mediated_decay	cds	ACT	TTC	chr11	+	149	36	-4	6418228	6418230	NA	NA	NA	11.3125	14.1737	12.6496	38.1358	NA	3	0	3
ENSMUSG00000071866	2637	ENSMUST00000132846	Ppia	protein_coding	cds	GGC	AGG	chr11	+	690	73.5	-90.5	6419145	6419147	NA	NA	NA	11.0681	11.4222	10.7262	33.2165	NA	3	0	3
ENSMUSG00000071866	2671	ENSMUST00000090749	Ppia	nonsense_mediated_decay	3utr	NA	NA	chr11	+	411	369	247	6419480	6419482	NA	NA	NA	12.2114	45.3767	28.4544	86.0425	NA	3	0	3
ENSMUSG00000071866	2685	ENSMUST00000090749	Ppia	nonsense_mediated_decay	3utr	NA	NA	chr11	+	521	479	357	6419590	6419592	NA	NA	NA	11.5485	29.4298	16.642	57.6202	NA	3	0	3
ENSMUSG00000071866	2691	ENSMUST00000132846	Ppia	protein_coding	cds	GGA	CAG	chr11	+	951	161	-3	6419598	6419600	NA	NA	NA	13.861	19.8793	45.1416	78.8819	NA	3	0	3
ENSMUSG00000072235	8866	ENSMUST00000097014	Tuba1a	protein_coding	cds	ATC	TCT	chr15	-	1075	275	-176	98950413	98950411	NA	NA	NA	16.4398	18.3117	13.6638	48.4152	NA	3	0	3
ENSMUSG00000072235	8914	ENSMUST00000097014	Tuba1a	protein_coding	cds	GAG	GAT	chr15	-	538	95.5	-355.5	98950950	98950948	NA	NA	NA	14.1195	27.1526	23.8606	65.1327	NA	3	0	3
ENSMUSG00000073639	11039	ENSMUST00000097680	Rab18	protein_coding	cds	TTT	GAT	chr18	+	141	31.5	-162.5	6770066	6770068	NA	NA	NA	26.1988	15.0662	10.7795	52.0445	NA	3	0	3
ENSMUSG00000073639	11040	ENSMUST00000097680	Rab18	protein_coding	cds	TAT	AAA	chr18	+	594	182	-11	6788568	6788570	NA	NA	NA	14.3331	11.0199	14.7309	40.084	NA	3	0	3
ENSMUSG00000073676	291	ENSMUST00000075242	Hspe1	protein_coding	cds	GAA	AAG	chr1	+	380	33.5	-68.5	55089149	55089151	NA	NA	NA	11.7596	13.6022	14.2522	39.614	NA	3	0	3
ENSMUSG00000073676	297	ENSMUST00000075242	Hspe1	protein_coding	cds	AGT	GAC	chr1	+	557	93	-9	55091090	55091092	NA	NA	NA	16.107	36.7644	25.752	78.6234	NA	3	0	3
ENSMUSG00000074403	14760	ENSMUST00000098843	H3c13	protein_coding	cds	GAC	ATC	chr3	+	409	123	-13	96269062	96269064	NA	NA	NA	17.5257	24.1914	12.9995	54.7166	NA	3	0	3
ENSMUSG00000074781	2140	ENSMUST00000099329	Ube2n	protein_coding	cds	GAT	GAG	chr10	+	144	27	-125	95541272	95541274	NA	NA	NA	28.4941	38.8478	24.3292	91.6711	NA	3	0	3
ENSMUSG00000076432	5165	ENSMUST00000155480	Ywhaq	protein_coding	3utr	NA	NA	chr12	-	908	782	51	21391394	21391392	NA	NA	NA	15.5684	58.7133	27.2509	101.533	NA	3	0	3
ENSMUSG00000076432	5169	ENSMUST00000135088, ENSMUST00000103002, ENSMUST00000155480	Ywhaq	protein_coding	cds	GAT	GAG	chr12	-	802.667	196	-48.3333	21395055	21395053	NA	NA	NA	13.6036	21.2249	14.6503	49.4787	NA	3	0	3
ENSMUSG00000078184	1176	ENSMUST00000104983	Rbm8a2	protein_coding	cds	GGG	GAA	chr1	-	493	96	-78	175978622	175978620	NA	NA	NA	15.4965	17.9631	31.4345	64.8941	NA	3	0	3
ENSMUSG00000078193	976	ENSMUST00000102782	Gm2000	protein_coding	cds	CAA	AAA	chr1	+	230	64	-59	156366269	156366271	NA	NA	NA	11.2662	26.8507	13.5297	51.6466	NA	3	0	3
ENSMUSG00000078578	15042	ENSMUST00000106291	Ube2d3	protein_coding	cds	GAT	AAG	chr3	+	643	130.5	-16	135465252	135465254	NA	NA	NA	16.2481	34.9333	24.719	75.9004	NA	3	0	3
ENSMUSG00000078578	15043	ENSMUST00000166033	Ube2d3	protein_coding	cds	GAT	AAG	chr3	+	743	131	-16	135465302	135465304	NA	NA	NA	17.2016	29.4182	27.8848	74.5046	NA	3	0	3
ENSMUSG00000078713	15373	ENSMUST00000107809, ENSMUST00000107808, ENSMUST00000107807, ENSMUST00000107810	Tomm5	protein_coding	cds	GAG	GAG	chr4	-	98	13	-51.75	45107995	45107993	NA	NA	NA	10.3283	17.9076	27.2342	55.4701	NA	3	0	3
ENSMUSG00000079111	17663	ENSMUST00000110731	Kdelr2	protein_coding	cds	AAT	CAC	chr5	+	388	88	-124	143418103	143418105	NA	NA	NA	19.1878	12.4772	18.1461	49.8112	NA	3	0	3
ENSMUSG00000079426	18509	ENSMUST00000171058	Arpc4	protein_coding	cds	GAC	AAG	chr6	+	208	65	-26	113385505	113385507	NA	NA	NA	11.8113	31.1247	47.6127	90.5487	NA	3	0	3
ENSMUSG00000079426	18511	ENSMUST00000156898	Arpc4	protein_coding	cds	GAC	AAG	chr6	+	517	142	-26	113385585	113385587	NA	NA	NA	11.9597	32.4547	50.6801	95.0945	NA	3	0	3
ENSMUSG00000079477	18418	ENSMUST00000113600, ENSMUST00000113598, ENSMUST00000113597, ENSMUST00000113596, ENSMUST00000095048	Rab7	protein_coding	cds	CCT	GAA	chr6	-	777.4	186	-21	88000501	88000499	NA	NA	NA	12.3225	19.5546	19.1667	51.0437	NA	3	0	3
ENSMUSG00000079477	18420	ENSMUST00000113600, ENSMUST00000113598, ENSMUST00000113597, ENSMUST00000113596, ENSMUST00000095048	Rab7	protein_coding	cds	CCT	TAC	chr6	-	666.4	149	-58	88004252	88004250	NA	NA	NA	13.2791	21.7917	13.4682	48.539	NA	3	0	3
ENSMUSG00000079480	23993	ENSMUST00000113627	Pin4	protein_coding	cds	CCA	GTT	chrX	+	417	114	-17	102127597	102127599	NA	NA	NA	11.141	13.6667	21.1814	45.9891	NA	3	0	3
ENSMUSG00000079614	11482	ENSMUST00000025421	Seh1l	protein_coding	cds	CCC	GTC	chr18	+	794	220	-140	67788731	67788733	NA	NA	NA	11.091	15.8354	15.5162	42.4427	NA	3	0	3
ENSMUSG00000081058	14630	ENSMUST00000167403	H3c15	protein_coding	cds	GAC	ATC	chr3	-	555	123	-13	96238573	96238571	NA	NA	NA	17.5257	24.1914	12.9995	54.7166	NA	3	0	3
ENSMUSG00000083649	19121	ENSMUST00000147835	Rasl2-9	protein_coding	cds	CAG	ACG	chr7	-	633	204	-12	5125318	5125316	NA	NA	NA	14.7553	22.0419	18.3022	55.0994	NA	3	0	3
ENSMUSG00000083649	19126	ENSMUST00000147835	Rasl2-9	protein_coding	cds	GCT	TTG	chr7	-	594	191	-25	5125357	5125355	NA	NA	NA	14.0802	12.6837	13.3343	40.0982	NA	3	0	3
ENSMUSG00000083649	19135	ENSMUST00000147835	Rasl2-9	protein_coding	cds	TGT	GCC	chr7	-	273	84	-132	5125678	5125676	NA	NA	NA	11.6324	17.9101	14.8981	44.4407	NA	3	0	3
ENSMUSG00000090451	11559	ENSMUST00000164064	Gm6133	protein_coding	cds	CCA	GAA	chr18	+	516	159	-31	78350269	78350271	NA	NA	NA	10.667	15.1248	15.149	40.9409	NA	3	0	3
ENSMUSG00000090553	865	ENSMUST00000171264	Snrpe	protein_coding	cds	ATG	AAC	chr1	-	33	11	-13	133606565	133606563	NA	NA	NA	11.4176	15.3482	18.8202	45.586	NA	3	0	3
ENSMUSG00000090553	866	ENSMUST00000166915, ENSMUST00000164096	Snrpe	protein_coding	cds	GAT	GAG	chr1	-	203	50	-41.5	133606574	133606572	NA	NA	NA	13.5781	26.2305	40.8355	80.644	NA	3	0	3
ENSMUSG00000091405	14733	ENSMUST00000171473	H4c14	protein_coding	cds	CAC	GCC	chr3	-	232	74.5	-28.5	96263080	96263078	NA	NA	NA	14.7805	44.8618	55.6142	115.256	NA	3	0	3
ENSMUSG00000093769	14725	ENSMUST00000176059, ENSMUST00000177796	H3c14	protein_coding	cds	GAC	ATC	chr3	+	570	145.5	-13	96247254	96247256	NA	NA	NA	17.5257	24.1914	12.9995	54.7166	NA	3	0	3
ENSMUSG00000095217	5948	ENSMUST00000091709	H2bc15	protein_coding	cds	ACC	AAG	chr13	+	357	119	-7	21754479	21754481	NA	NA	NA	10.3797	27.1264	19.921	57.427	NA	3	0	3
ENSMUSG00000097148	7268	ENSMUST00000181173	Gm3839	protein_coding	cds	GAC	AAT	chr14	-	1449	312	-21	11280998	11280996	NA	NA	NA	10.6536	24.9461	11.0457	46.6454	NA	3	0	3
ENSMUSG00000097148	7292	ENSMUST00000181173	Gm3839	protein_coding	cds	GTG	GAA	chr14	-	1017	168	-165	11281430	11281428	NA	NA	NA	14.6006	31.4095	18.813	64.8231	NA	3	0	3
ENSMUSG00000098274	9553	ENSMUST00000023269	Rpl24	protein_coding	cds	AGG	AAA	chr16	+	459	100	-57	55969617	55969619	NA	NA	NA	11.1114	12.8982	13.7451	37.7547	NA	3	0	3
ENSMUSG00000098549	217	ENSMUST00000183590	Gm5269	protein_coding	cds	CAT	ACT	chr1	-	93	31	-14	45889986	45889984	NA	NA	NA	17.9493	30.1932	19.2871	67.4296	NA	3	0	3
ENSMUSG00000098559	24209	ENSMUST00000183728	Gm15013	protein_coding	cds	GAT	TTG	chrX	-	486	162	-104	139713996	139713994	NA	NA	NA	12.2842	14.8245	21.4461	48.5548	NA	3	0	3
ENSMUSG00000098640	13537	ENSMUST00000184654	Gm14214	protein_coding	cds	AAC	TCG	chr2	-	498	165.5	-59	154769435	154769433	NA	NA	NA	12.6779	18.3334	11.7897	42.801	NA	3	0	3
ENSMUSG00000099517	6244	ENSMUST00000080859	H3c8	protein_coding	cds	CGC	TAC	chr13	+	144	40	-96	23535577	23535579	NA	NA	NA	18.9391	31.444	37.2669	87.65	NA	3	0	3
ENSMUSG00000100210	6292	ENSMUST00000075558	H3c7	protein_coding	cds	GAC	ATC	chr13	+	802	123	-13	23545266	23545268	NA	NA	NA	16.8657	20.897	19.6017	57.3643	NA	3	0	3
ENSMUSG00000101355	5879	ENSMUST00000188775	H3c10	protein_coding	cds	GAC	ATC	chr13	+	369	123	-13	21718027	21718029	NA	NA	NA	18.0028	19.75	18.833	56.5858	NA	3	0	3
ENSMUSG00000103034	13930	ENSMUST00000192045	Gm8797	protein_coding	cds	CCC	CCT	chr3	+	206	36	-41	5751011	5751013	NA	NA	NA	14.472	24.5026	22.6503	61.6249	NA	3	0	3
ENSMUSG00000108596	20610	ENSMUST00000134694	Gm49368	protein_coding	cds	TGA	AAC	chr7	+	147	48	-76	128126886	128126888	NA	NA	NA	11.2916	15.11	15.6377	42.0393	NA	3	0	3
ENSMUSG00000108596	20611	ENSMUST00000134694	Gm49368	protein_coding	cds	TCA	AAA	chr7	+	261	87	-38	128127000	128127002	NA	NA	NA	13.2174	20.5816	22.0949	55.894	NA	3	0	3
ENSMUSG00000109324	19767	ENSMUST00000107843	Prmt1	protein_coding	cds	TTC	AAG	chr7	-	1312	354	-17	44976806	44976804	NA	NA	NA	10.2964	14.9184	14.1662	39.3811	NA	3	0	3
ENSMUSG00000109865	12402	ENSMUST00000027961	Hspa14	protein_coding	5utr	NA	NA	chr2	-	69	-56	-1585	3512746	3512744	NA	NA	NA	12.46	19.1642	18.0878	49.712	NA	3	0	3
ENSMUSG00000116358	8899	ENSMUST00000134214	Gm49450	protein_coding	cds	GAG	GAT	chr15	-	386	95.5	-170.5	98950779	98950777	NA	NA	NA	12.0558	25.2731	21.2498	58.5787	NA	3	0	3
ENSMUSG00000000568	16953	ENSMUST00000172361, ENSMUST00000019128, ENSMUST00000112939, ENSMUST00000072750, ENSMUST00000171786	Hnrnpd	protein_coding	cds	GGT	GAA	chr5	-	592.125	100.25	-197.75	99967318	99967316	14.8114	28.8971	12.124	48.5314	15.4742	10.6661	74.6716	55.8325	3	3	0
ENSMUSG00000000740	21667	ENSMUST00000000756	Rpl13	protein_coding	cds	GTC	CGG	chr8	+	309	69	-142	123102947	123102949	31.5476	47.4082	21.6629	82.4929	39.4079	14.7021	136.603	100.619	3	3	0
ENSMUSG00000000787	23597	ENSMUST00000000804	Ddx3x	protein_coding	cds	CCT	CAG	chrX	+	1217	358	-304	13289443	13289445	17.1275	22.0952	14.779	21.21	12.1354	12.2202	45.5656	54.0016	3	3	0
ENSMUSG00000001016	14482	ENSMUST00000001042	Ilf2	protein_coding	cds	GAT	GAG	chr3	+	238	47.5	-342	90480693	90480695	10.7719	24.925	17.029	42.7493	16.7777	11.8711	71.3981	52.7259	3	3	0
ENSMUSG00000001016	14484	ENSMUST00000001042	Ilf2	protein_coding	cds	CCC	AAT	chr3	+	637	180.5	-209	90485709	90485711	12.7017	14.4072	10.1223	28.0507	18.5	11.8534	58.404	37.2312	3	3	0
ENSMUSG00000001440	4154	ENSMUST00000001479	Kpnb1	protein_coding	cds	ATT	GGT	chr11	-	755	152.5	-723	97181649	97181647	27.2493	30.7796	13.0911	42.6619	106.491	44.3809	193.534	71.12	3	3	0
ENSMUSG00000001473	11468	ENSMUST00000001513	Tubb6	protein_coding	cds	GAC	AAC	chr18	+	647	201.5	-245	67401638	67401640	17.1297	26.6584	28.3551	68.9537	75.1667	49.0578	193.178	72.1432	3	3	0
ENSMUSG00000001525	10576	ENSMUST00000001566	Tubb5	protein_coding	cds	GAG	CTC	chr17	-	1378	374.5	-69.5	35835192	35835190	10.253	17.1583	14.0613	20.6256	27.1378	33.6852	81.4486	41.4727	3	3	0
ENSMUSG00000001525	10588	ENSMUST00000001566	Tubb5	protein_coding	cds	GGA	GAC	chr17	-	919	222	-222	35835651	35835649	45.7968	44.9177	31.2863	76.5449	64.0318	22.0193	162.596	122.001	3	3	0
ENSMUSG00000001642	18021	ENSMUST00000154655	Akr1b3	protein_coding	cds	TCA	GGG	chr6	-	504	150	-25	34310973	34310971	48.3183	49.2366	50.9732	93.8	64.1574	53.1833	211.141	148.528	3	3	0
ENSMUSG00000001642	18022	ENSMUST00000102980	Akr1b3	protein_coding	cds	TCA	GGG	chr6	-	454	127	-189	34310992	34310990	45.4988	44.0509	47.3347	90.4047	59.5998	49.6829	199.687	136.884	3	3	0
ENSMUSG00000001924	23624	ENSMUST00000089217, ENSMUST00000001989	Uba1	protein_coding	cds	TTT	GAA	chrX	+	3085.5	957	-101	20681935	20681937	11.8323	21.5	19.9755	42.2909	72.2631	42.8968	157.451	53.3079	3	3	0
ENSMUSG00000002985	19339	ENSMUST00000174064	Apoe	protein_coding	cds	CGC	AAG	chr7	-	654	151	-160	19696841	19696839	10.9245	11.2372	11.1811	18.7837	38.4737	17.6585	74.9158	33.3428	3	3	0
ENSMUSG00000002985	19341	ENSMUST00000173739, ENSMUST00000003066, ENSMUST00000172983, ENSMUST00000174144, ENSMUST00000172808, ENSMUST00000174355	Apoe	protein_coding	cds	CGC	AAG	chr7	-	544.167	149.167	-107.5	19696863	19696861	11.9934	11.7453	10.7475	19.6274	36.7924	18.2673	74.6871	34.4861	3	3	0
ENSMUSG00000003153	18651	ENSMUST00000166135	Slc2a3	nonsense_mediated_decay	3utr	NA	NA	chr6	-	389	388	197	122736702	122736700	18.2675	42.5442	35.5768	49.9349	31.3487	10.9322	92.2158	96.3885	3	3	0
ENSMUSG00000003402	21868	ENSMUST00000115331	Prkcsh	protein_coding	cds	CCA	GAA	chr9	+	1631	516	-12	22013092	22013094	19.4201	20.0463	17.3517	25.93	35.7877	54.0077	115.725	56.8181	3	3	0
ENSMUSG00000003402	21869	ENSMUST00000003493	Prkcsh	protein_coding	cds	CCA	GAA	chr9	+	1658	509	-12	22013140	22013142	19.3105	19.8666	17.1944	25.8262	35.7877	53.5891	115.203	56.3715	3	3	0
ENSMUSG00000003429	19797	ENSMUST00000003521	Rps11	protein_coding	cds	CAC	AAG	chr7	-	443	105	-53	45122547	45122545	19.2851	28.6836	23.0846	33.3929	45.0588	30.2918	108.744	71.0533	3	3	0
ENSMUSG00000003814	21272	ENSMUST00000003912	Calr	protein_coding	cds	GAT	GCT	chr8	-	769	210.5	-205.5	84844643	84844641	51.8162	45.1382	32.152	65.7717	36.4968	30.697	132.965	129.106	3	3	0
ENSMUSG00000003970	8365	ENSMUST00000004072	Rpl8	protein_coding	cds	GTG	TAC	chr15	+	303	87	-170	76904654	76904656	10.2976	13.3686	15.4993	23.6599	37.14	26.7206	87.5205	39.1656	3	3	0
ENSMUSG00000004980	18136	ENSMUST00000069949, ENSMUST00000090002	Hnrnpa2b1	protein_coding	cds	CAT	GAT	chr6	-	643.5	150	-171	51466520	51466518	15.549	24.4024	27.7216	44.3652	26.8583	16.2006	87.4241	67.673	3	3	0
ENSMUSG00000004980	18138	ENSMUST00000114459	Hnrnpa2b1	protein_coding	cds	CAT	GAT	chr6	-	636	162	-191	51466552	51466550	18.1186	26.4712	27.768	48.8311	25.0176	19.8032	93.6519	72.3578	3	3	0
ENSMUSG00000005354	8422	ENSMUST00000005487, ENSMUST00000109748, ENSMUST00000109747, ENSMUST00000100486	Txn2	protein_coding	cds	CCT	CCT	chr15	-	372.25	18	-132	77927901	77927899	13.2403	11.3297	12.0758	13.4741	24.8686	13.5946	51.9374	36.6458	3	3	0
ENSMUSG00000005610	20287	ENSMUST00000162415, ENSMUST00000160132	Eif4g2	protein_coding	5utr	NA	NA	chr7	-	93.5	-203	-1804	111082932	111082930	52.3796	85.7296	65.3731	85.2353	48.5607	43.7987	177.595	203.482	3	3	0
ENSMUSG00000005656	5288	ENSMUST00000005798	Snx6	protein_coding	cds	TTG	GAA	chr12	-	548	166	-240	54768037	54768035	13.4212	15.8226	15.3218	22.5807	27.1865	14.3604	64.1276	44.5656	3	3	0
ENSMUSG00000006304	513	ENSMUST00000113820, ENSMUST00000006467, ENSMUST00000113819	Arpc2	protein_coding	cds	CCT	CTA	chr1	+	831	199.667	-95	74262524	74262526	18.1333	20.9768	13.2408	29.2566	16.1456	15.3862	60.7883	52.3509	3	3	0
ENSMUSG00000006333	19061	ENSMUST00000006496, ENSMUST00000108625, ENSMUST00000108623, ENSMUST00000108624, ENSMUST00000146927	Rps9	protein_coding, nonsense_mediated_decay	cds, 3utr	GTG, NA	AAG, NA	chr7	+	729.714	407	144.286	3706759	3706761	46.4024	81.3106	29.6803	74.6872	15.5881	15.7081	105.983	157.393	3	3	0
ENSMUSG00000006333	19062	ENSMUST00000108623, ENSMUST00000108624, ENSMUST00000146927	Rps9	protein_coding, nonsense_mediated_decay	3utr	NA	NA	chr7	+	751	722	367	3706760	3706762	31.217	66.2034	26.8336	57.4366	17.4569	17.351	92.2445	124.254	3	3	0
ENSMUSG00000006392	15766	ENSMUST00000084319, ENSMUST00000073881, ENSMUST00000019229, ENSMUST00000106384	Med8	protein_coding	cds	GGA	GAC	chr4	+	571.25	134.5	-68	118413658	118413660	18.2537	23.3833	10.4149	51.7984	67.7576	50.5003	170.056	52.0519	3	3	0
ENSMUSG00000006398	15778	ENSMUST00000006565	Cdc20	protein_coding	cds	GGA	GAC	chr4	-	906	225	-274	118436047	118436045	12.3029	17.0619	11.5655	26.8095	22.6357	14.8388	64.284	40.9303	3	3	0
ENSMUSG00000006728	2273	ENSMUST00000006911, ENSMUST00000133115, ENSMUST00000125682	Cdk4	protein_coding	cds	CCA	GAA	chr10	+	965.667	232.5	-42.5	127066116	127066118	88.1285	116.95	109.992	238.965	170.525	166.937	576.427	315.07	3	3	0
ENSMUSG00000006728	2274	ENSMUST00000120226, ENSMUST00000142558	Cdk4	protein_coding, nonsense_mediated_decay	cds, 3utr	CAG, NA	AAG, NA	chr10	+	626	339.5	148.5	127066117	127066119	74.4274	97.9884	77.2128	195.778	135.676	140.445	471.899	249.629	3	3	0
ENSMUSG00000006728	2275	ENSMUST00000142558	Cdk4	nonsense_mediated_decay	3utr	NA	NA	chr10	+	732	564	340	127066118	127066120	40.2263	53.9003	71.0141	122.678	171.068	127.766	421.513	165.141	3	3	0
ENSMUSG00000008668	10460	ENSMUST00000174609	Rps18	protein_coding	cds	GAC	TGG	chr17	-	283	80	-27	33952454	33952452	17.0474	19.2878	21.2473	27.7295	59.7495	98.6466	186.126	57.5824	3	3	0
ENSMUSG00000008668	10462	ENSMUST00000008812	Rps18	protein_coding	cds	GAC	TGG	chr17	-	297	80	-72	33952494	33952492	17.0474	19.2878	21.2473	27.7295	59.7495	98.6466	186.126	57.5824	3	3	0
ENSMUSG00000008682	23857	ENSMUST00000135690	Rpl10	protein_coding	cds	CTG	ATG	chrX	+	434	136.5	-29	74272996	74272998	11.141	13.0715	11.6631	25.8509	36.715	43.22	105.786	35.8756	3	3	0
ENSMUSG00000008683	20379	ENSMUST00000106588, ENSMUST00000106590, ENSMUST00000172457, ENSMUST00000131840, ENSMUST00000128482	Rps15a	protein_coding	cds	GCG	GAT	chr7	-	215.2	7	-95.8	118115221	118115219	11.8014	11.8033	12.1465	25.0524	19.8188	28.6361	73.5072	35.7511	3	3	0
ENSMUSG00000009470	7129	ENSMUST00000109399, ENSMUST00000109401, ENSMUST00000179301	Tnpo1	protein_coding	cds	CCT	TTG	chr13	-	1820.67	569.167	-295.167	98856952	98856950	10.5841	14.2744	11.8682	33.0711	25.108	11.5655	69.7447	36.7266	3	3	0
ENSMUSG00000009470	7134	ENSMUST00000109399, ENSMUST00000109401, ENSMUST00000179301	Tnpo1	protein_coding	cds	ATT	GAG	chr13	-	767.667	218.667	-646	98870246	98870244	19.2211	14.0582	19.5992	34.0405	60.6003	91.0569	185.698	52.8785	3	3	0
ENSMUSG00000009575	9089	ENSMUST00000118152, ENSMUST00000108813, ENSMUST00000122182	Cbx5	protein_coding	cds	GAT	GAA	chr15	-	583.333	144.5	-46	103199782	103199780	19.799	40.2246	15.8502	42.1726	47.7344	25.6043	115.511	75.8737	3	3	0
ENSMUSG00000012405	7345	ENSMUST00000080281, ENSMUST00000100799, ENSMUST00000079419, ENSMUST00000112598	Rpl15	protein_coding	cds	GGT	GAA	chr14	-	525	121	-83	18269263	18269261	15.925	16.3425	10.5623	22.423	28.2265	28.9521	79.6016	42.8299	3	3	0
ENSMUSG00000012405	7356	ENSMUST00000080281, ENSMUST00000100799, ENSMUST00000079419, ENSMUST00000112598, ENSMUST00000147121	Rpl15	protein_coding	cds	GTC	ATT	chr14	-	343.2	58.5	-125.5	18270039	18270037	12.8421	13.2673	17.3307	23.5644	38.3614	29.4432	91.369	43.4401	3	3	0
ENSMUSG00000012848	19186	ENSMUST00000108539, ENSMUST00000004554	Rps5	protein_coding	cds	AAG	AAA	chr7	+	690	191	-13	12926598	12926600	13.3094	21.6065	15.5414	24.3441	36.0861	40.5237	100.954	50.4574	3	3	0
ENSMUSG00000013415	4093	ENSMUST00000013559	Igf2bp1	protein_coding	cds	CTA	AAA	chr11	-	1726	472.5	-104	95966759	95966757	13.7211	11.8295	13.9382	11.1204	35.7799	52.4521	99.3524	39.4888	3	3	0
ENSMUSG00000013415	4095	ENSMUST00000013559	Igf2bp1	protein_coding	cds	CCA	GAA	chr11	-	1636	442.5	-134	95967615	95967613	22.6149	25.3002	13.5295	43.5593	43.8181	48.7928	136.17	61.4446	3	3	0
ENSMUSG00000014956	16547	ENSMUST00000015100	Ppp1cb	protein_coding	cds	GGA	AAG	chr5	+	798	95	-232	32483360	32483362	20.677	34.7121	14.8517	34.5231	62.5316	37.0044	134.059	70.2408	3	3	0
ENSMUSG00000015120	10051	ENSMUST00000049911, ENSMUST00000173084, ENSMUST00000173713, ENSMUST00000172618, ENSMUST00000174031, ENSMUST00000174001, ENSMUST00000173621, ENSMUST00000172868, ENSMUST00000172587	Ube2i	protein_coding	cds	GAT	GGC	chr17	-	386	32	-107.111	25269246	25269244	14.7036	22.4605	14.4908	28.4201	27.8068	16.7862	73.013	51.6549	3	3	0
ENSMUSG00000015165	19527	ENSMUST00000174548, ENSMUST00000038572	Hnrnpl	protein_coding	cds	GTG	GAA	chr7	+	619.5	110	-476	28813350	28813352	12.2343	27.0598	10.1243	58.2602	145.083	152.499	355.843	49.4185	3	3	0
ENSMUSG00000015165	19531	ENSMUST00000174477	Hnrnpl	protein_coding	cds	GGG	CGA	chr7	+	510	170	-444	28814012	28814014	13.9938	21.1385	13.129	60.2941	36.2997	43.1666	139.76	48.2613	3	3	0
ENSMUSG00000015165	19532	ENSMUST00000172529, ENSMUST00000174548, ENSMUST00000172884, ENSMUST00000174882, ENSMUST00000038572	Hnrnpl	protein_coding, nonsense_mediated_decay	cds	GGC	GAC	chr7	+	473.167	95.8333	-303.5	28814013	28814015	14.1089	20.7567	13.5137	60.7997	35.7075	50.1682	146.675	48.3793	3	3	0
ENSMUSG00000015165	19550	ENSMUST00000174548, ENSMUST00000172529, ENSMUST00000038572	Hnrnpl	protein_coding	cds	CAT	GAT	chr7	+	1099.33	281.667	-261	28818675	28818677	46.2712	51.1086	44.1986	39.3556	25.5325	24.9902	89.8782	141.578	3	3	0
ENSMUSG00000015165	19552	ENSMUST00000174477, ENSMUST00000174882	Hnrnpl	protein_coding, nonsense_mediated_decay	cds, 3utr	TGA, NA	TGA, NA	chr7	+	949	476.333	-134.667	28818677	28818679	11.1506	17.2547	14.8682	12.9112	22.3116	24.595	59.8178	43.2735	3	3	0
ENSMUSG00000015656	21969	ENSMUST00000015800, ENSMUST00000117557, ENSMUST00000133964	Hspa8	protein_coding	cds	ACG	GAC	chr9	+	327.667	43.5	-419.167	40802054	40802056	18.6454	14.2418	17.3769	13.5627	31.2029	38.1208	82.8864	50.2641	3	3	0
ENSMUSG00000015656	21992	ENSMUST00000015800, ENSMUST00000117557	Hspa8	protein_coding	cds	GGA	GGT	chr9	+	782.5	190.5	-446	40803009	40803011	21.9034	29.0867	13.0551	58.9062	46.6571	23.746	129.309	64.0451	3	3	0
ENSMUSG00000015656	21999	ENSMUST00000015800, ENSMUST00000117557	Hspa8	protein_coding	cds	ACC	CAC	chr9	+	857.5	215.5	-421	40803084	40803086	20.3717	24.6287	20.6981	26.234	24.6247	12.3648	63.2235	65.6985	3	3	0
ENSMUSG00000015656	22021	ENSMUST00000015800, ENSMUST00000117557	Hspa8	protein_coding	cds	GGC	GGA	chr9	+	1400.5	396.5	-240	40803837	40803839	19.6657	19.2954	24.0404	34.3849	64.4299	76.5481	175.363	63.0015	3	3	0
ENSMUSG00000015656	22026	ENSMUST00000015800, ENSMUST00000117557	Hspa8	protein_coding	cds	CAG	CCT	chr9	+	1484.5	424	-212.5	40803921	40803923	10.1526	26.6207	21.6623	21.928	25.6972	35.7473	83.3724	58.4356	3	3	0
ENSMUSG00000015656	22033	ENSMUST00000015800, ENSMUST00000117557	Hspa8	protein_coding	cds	TTT	GAC	chr9	+	1613.5	467.5	-169	40804272	40804274	18.9771	17.1138	23.0106	22.5359	38.1379	33.0748	93.7486	59.1015	3	3	0
ENSMUSG00000015656	22041	ENSMUST00000015800, ENSMUST00000117557	Hspa8	protein_coding	cds	AAC	ATG	chr9	+	1823.5	537.5	-99	40804581	40804583	13.1328	13.927	10.5536	25.4238	31.0522	25.9691	82.445	37.6134	3	3	0
ENSMUSG00000016559	4645	ENSMUST00000106454, ENSMUST00000016703	H3f3b	protein_coding	cds	CAG	GAG	chr11	-	651	92.5	-43.5	116023628	116023626	16.8363	27.0137	16.3233	36.8405	34.108	37.3667	108.315	60.1733	3	3	0
ENSMUSG00000017404	4211	ENSMUST00000092425, ENSMUST00000017548	Rpl19	protein_coding	cds	GGG	CTG	chr11	+	196	46	-149	98028374	98028376	31.0462	45.8873	30.8827	46.836	22.2796	13.5146	82.6302	107.816	3	3	0
ENSMUSG00000017404	4222	ENSMUST00000092425, ENSMUST00000017548	Rpl19	protein_coding	cds	GAC	CGC	chr11	+	400	114	-81	98029504	98029506	43.3013	47.7595	39.4343	58.4426	43.7518	41.5955	143.79	130.495	3	3	0
ENSMUSG00000018040	8675	ENSMUST00000018184, ENSMUST00000166019, ENSMUST00000167483	Rrp7a	protein_coding, nonsense_mediated_decay	cds	CCC	GAT	chr15	-	230	60.5	-134.667	83121880	83121878	16.6522	29.2563	14.2195	40.0083	48.6833	97.6445	186.336	60.128	3	3	0
ENSMUSG00000018102	6519	ENSMUST00000018246	H2bc4	protein_coding	cds	GTG	ACC	chr13	+	87	18	-108	23684285	23684287	18.2709	14.4043	12.8475	27.6513	27.9807	12.111	67.743	45.5227	3	3	0
ENSMUSG00000018102	6521	ENSMUST00000018246	H2bc4	protein_coding	cds	ATC	GCG	chr13	+	252	73	-53	23684450	23684452	38.9055	64.1618	42.7239	67.6189	59.73	66.3277	193.676	145.791	3	3	0
ENSMUSG00000018102	6525	ENSMUST00000018246	H2bc4	protein_coding	cds	ACC	AAG	chr13	+	390	119	-7	23684588	23684590	11.8166	28.8012	13.65	24.6835	47.2867	52.5759	124.546	54.2678	3	3	0
ENSMUSG00000018286	3552	ENSMUST00000018430	Psmb6	protein_coding	cds	CCA	CTA	chr11	+	329	106	-132	70526562	70526564	23.7019	21.4961	15.8667	33.2716	19.2909	40.2715	92.8339	61.0646	3	3	0
ENSMUSG00000018293	3574	ENSMUST00000178254	Pfn1	nonsense_mediated_decay	3utr	NA	NA	chr11	-	442	300	133	70652221	70652219	24.1069	27.4922	29.6891	35.5801	20.628	22.03	78.2382	81.2882	3	3	0
ENSMUSG00000018293	3575	ENSMUST00000018437, ENSMUST00000178254	Pfn1	protein_coding, nonsense_mediated_decay	cds, 3utr	ACG, NA	CTA, NA	chr11	-	464.5	203.5	50	70652221	70652787	15.0904	26.5847	25.8961	35.8275	46.4935	43.7531	126.074	67.5712	3	3	0
ENSMUSG00000018339	3254	ENSMUST00000125094, ENSMUST00000082430, ENSMUST00000149324	Gpx3	protein_coding	cds	TAC	TGA	chr11	+	367.667	71	-143	54907252	54907254	14.0028	22.7617	21.0733	21.2375	27.2937	13.4423	61.9735	57.8378	3	3	0
ENSMUSG00000018446	3603	ENSMUST00000078528	C1qbp	protein_coding	cds	GAG	GAC	chr11	-	883	269	-10	70978128	70978126	10.961	11.0428	12.9165	23.1154	17.0606	10.0791	50.255	34.9202	3	3	0
ENSMUSG00000019373	3337	ENSMUST00000019517, ENSMUST00000141415	Cops3	protein_coding	cds	GTT	CCT	chr11	-	320.667	87.6667	-123.667	59833120	59833118	11	12.773	10.5342	11.1175	19.2016	16.824	47.1431	34.3072	3	3	0
ENSMUSG00000019505	3359	ENSMUST00000019649, ENSMUST00000136938	Ubb	protein_coding	cds	AAG	GCC	chr11	+	384.5	25.5	-244.5	62552223	62552225	14.9082	26.443	17.92	24.2015	63.3151	50.5376	138.054	59.2712	3	3	0
ENSMUSG00000019505	3367	ENSMUST00000019649, ENSMUST00000136938	Ubb	protein_coding	cds	GTG	AAG	chr11	+	546.5	80	-190	62552385	62552387	17.1076	11.3346	19.7849	22.0679	30.9697	16.2131	69.2506	48.2271	3	3	0
ENSMUSG00000019505	3371	ENSMUST00000136938, ENSMUST00000019649	Ubb	protein_coding	cds	AAG	GCC	chr11	+	612.5	101.5	-168.5	62552451	62552453	13.8577	21.6636	17.286	21.7108	59.3736	51.6693	132.754	52.8073	3	3	0
ENSMUSG00000019505	3379	ENSMUST00000019649, ENSMUST00000136938	Ubb	protein_coding	cds	AAG	GCC	chr11	+	882	177.667	-104	62552679	62552681	13.1251	21.4389	16.969	22.856	60.8024	52.8265	136.485	51.533	3	3	0
ENSMUSG00000019505	3387	ENSMUST00000019649	Ubb	protein_coding	cds	GTG	AAG	chr11	+	1127	232	-73	62552841	62552843	17.3016	10.9764	20.1125	23.2766	33.3618	15.5238	72.1622	48.3906	3	3	0
ENSMUSG00000019505	3389	ENSMUST00000019649	Ubb	protein_coding	cds	GTG	GAG	chr11	+	1163	243.5	-61.5	62552877	62552879	13.0191	14.101	15.3496	17.7293	15.731	16.4228	49.8831	42.4697	3	3	0
ENSMUSG00000020048	1977	ENSMUST00000020238, ENSMUST00000129413	Hsp90b1	protein_coding	cds	GAT	GAA	chr10	-	1307	410	-177	86694088	86694086	21.4016	18.5032	10.9834	23.0951	36.161	15.0417	74.2978	50.8882	3	3	0
ENSMUSG00000020069	1505	ENSMUST00000020263, ENSMUST00000118898	Hnrnph3	protein_coding	cds	CCA	AAT	chr10	-	324	41.5	-296.5	63018885	63018883	15.3606	13.2673	15.7501	13.3607	15.065	10.518	38.9437	44.3781	3	3	0
ENSMUSG00000020250	1926	ENSMUST00000020484	Txnrd1	protein_coding	cds	GTC	GAA	chr10	+	425	89	-410	82877292	82877294	21.0075	12.4516	14.7655	25.7209	18.6191	17.1297	61.4697	48.2246	3	3	0
ENSMUSG00000020307	1630	ENSMUST00000020550, ENSMUST00000166603	Cdc34	protein_coding	cds	CTC	AAG	chr10	+	310	61	-174	79684823	79684825	23.4167	36.0295	32.6762	40.5354	50.0948	85.2105	175.841	92.1224	3	3	0
ENSMUSG00000020358	3125	ENSMUST00000074669, ENSMUST00000101249, ENSMUST00000109103	Hnrnpab	protein_coding	cds	GAT	CCT	chr11	-	834	210	-99.3333	51604454	51604452	29.7575	43.2678	26.1113	77.0293	122.791	56.9795	256.8	99.1366	3	3	0
ENSMUSG00000020358	3135	ENSMUST00000074669, ENSMUST00000101249, ENSMUST00000109103	Hnrnpab	protein_coding	cds	GGA	GAG	chr11	-	498	97.5	-211.333	51605560	51605558	33.8822	44.0886	25.7926	84.5953	15.4087	11.4805	111.485	103.763	3	3	0
ENSMUSG00000020372	3037	ENSMUST00000020640	Rack1	protein_coding	cds	GAG	GGC	chr11	+	887	260.5	-56.5	48805550	48805552	36.2385	50.2763	29.5147	54.2017	93.9185	47.6916	195.812	116.029	3	3	0
ENSMUSG00000020460	2855	ENSMUST00000102845, ENSMUST00000102844	Rps27a	protein_coding	cds	AAC	ATT	chr11	-	386	58.5	-97	29546715	29546713	24.0061	42.5236	35.507	58.9184	47.2242	23.4736	129.616	102.037	3	3	0
ENSMUSG00000020484	2603	ENSMUST00000063084, ENSMUST00000149623	Xbp1	protein_coding	cds	ATG	AAC	chr11	+	957	227	-13	5524862	5524864	18.8485	25.4348	26.1279	65.1002	55.8801	75.869	196.849	70.4112	3	3	0
ENSMUSG00000020485	3986	ENSMUST00000152700, ENSMUST00000141169	Supt4a	nonsense_mediated_decay	3utr	NA	NA	chr11	+	511.5	463	174.5	87743308	87743310	24.019	23.1815	13.3451	48.5816	26.6837	12.7017	87.967	60.5455	3	3	0
ENSMUSG00000020571	5136	ENSMUST00000057288	Pdia6	protein_coding	cds	GTG	AAA	chr12	+	730	219	-226	17278893	17278895	20.7625	84.8142	26.1633	86.2914	115.896	17.7253	219.913	131.74	3	3	0
ENSMUSG00000020571	5139	ENSMUST00000057288	Pdia6	protein_coding	cds	CCA	GAG	chr12	+	913	280	-165	17279704	17279706	26.777	27.5261	13.9659	50.4751	75.9667	118.471	244.913	68.2691	3	3	0
ENSMUSG00000021024	5332	ENSMUST00000163070, ENSMUST00000021412	Psma6	protein_coding	cds	CTT	GAA	chr12	+	619.5	168.5	-68	55412311	55412313	21.3489	34.0477	10.4411	41.2134	61.3949	33.2609	135.869	65.8377	3	3	0
ENSMUSG00000021024	5333	ENSMUST00000162711	Psma6	nonsense_mediated_decay	3utr	NA	NA	chr12	+	561	439	278	55412312	55412314	21.5465	36.0313	10.6556	44.3076	65.4084	39.8498	149.566	68.2334	3	3	0
ENSMUSG00000021037	5565	ENSMUST00000021425	Ahsa1	protein_coding	cds	CTG	AAA	chr12	+	261	39	-299	87268239	87268241	32.5839	32.7841	42.4799	72.8098	79.6455	47.6235	200.079	107.848	3	3	0
ENSMUSG00000021048	5444	ENSMUST00000021443	Mthfd1	protein_coding	cds	CTG	AAG	chr12	+	374	55.5	-879	76270478	76270480	10.457	19.2076	10.7076	18.9038	50.2443	29	98.1481	40.3722	3	3	0
ENSMUSG00000021270	5669	ENSMUST00000094361, ENSMUST00000021698	Hsp90aa1	protein_coding	cds	GAT	CCT	chr12	-	2247	702	-31	110691636	110691634	44.4328	86.7292	84.5279	111.756	19.2352	30.8436	161.835	215.69	3	3	0
ENSMUSG00000021270	5672	ENSMUST00000094361, ENSMUST00000021698	Hsp90aa1	protein_coding	cds	GAA	ACT	chr12	-	2145	668	-65	110692202	110692200	12.8323	10.2899	12.4625	14.9672	31.2396	31.5041	77.711	35.5847	3	3	0
ENSMUSG00000021270	5693	ENSMUST00000094361, ENSMUST00000021698	Hsp90aa1	protein_coding	cds	ATG	AAG	chr12	-	1593	484	-249	110693057	110693055	13.0777	28.5255	14.7377	20.4253	53.3413	16.5476	90.3142	56.3409	3	3	0
ENSMUSG00000021270	5713	ENSMUST00000094361, ENSMUST00000021698	Hsp90aa1	protein_coding	cds	GAT	GAC	chr12	-	1047	302	-431	110694101	110694099	35.4847	41.6151	29.29	55.9096	85	83.4573	224.367	106.39	3	3	0
ENSMUSG00000021484	6838	ENSMUST00000021940	Lman2	protein_coding	cds	GGC	GTC	chr13	-	1082	296	-62	55348343	55348341	14.4223	17.6549	15.2998	15.9498	54.9858	61.1644	132.1	47.3769	3	3	0
ENSMUSG00000021546	6895	ENSMUST00000177019, ENSMUST00000176207, ENSMUST00000116403, ENSMUST00000177497, ENSMUST00000043269	Hnrnpk	protein_coding	cds	TTA	GAA	chr13	-	1398.5	402.333	-37.5	58393279	58393277	10.5079	11.3694	13.6966	27.6375	42.1178	25.6525	95.4078	35.5739	3	3	0
ENSMUSG00000021546	6909	ENSMUST00000177497, ENSMUST00000177019, ENSMUST00000116403, ENSMUST00000043269, ENSMUST00000176207	Hnrnpk	protein_coding	cds	GGA	GAC	chr13	-	1126.2	305.1	-134.4	58394331	58394329	15.0624	20.363	11.6358	24.3814	15.0817	13.0892	52.5522	47.0612	3	3	0
ENSMUSG00000021546	6910	ENSMUST00000176797	Hnrnpk	protein_coding	cds	TGG	AGA	chr13	-	375	125	-84	58394332	58394330	12.4366	18.0574	10.0466	25.2541	17.7084	14.0051	56.9676	40.5406	3	3	0
ENSMUSG00000021577	6995	ENSMUST00000022062	Sdha	protein_coding	cds	CCT	GAG	chr13	-	1188	371.5	-292	74332243	74332241	18.8485	28.4275	12.943	42.7239	12.4207	26.7665	81.9111	60.219	3	3	0
ENSMUSG00000021832	7602	ENSMUST00000022380	Psmc6	protein_coding	cds	CTT	AAG	chr14	+	135	25	-364	45330855	45330857	14.0624	20.1417	20.3882	25.6051	24.5366	19.919	70.0607	54.5924	3	3	0
ENSMUSG00000022194	7738	ENSMUST00000140691, ENSMUST00000116476, ENSMUST00000022808, ENSMUST00000150975, ENSMUST00000141446, ENSMUST00000139985, ENSMUST00000172557	Pabpn1	protein_coding	cds	GGT	GCA	chr14	+	430.286	110.143	-117	54895825	54895827	15.4927	29.1506	25.398	42.2896	80.0253	102.763	225.077	70.0413	3	3	0
ENSMUSG00000022205	8125	ENSMUST00000022816, ENSMUST00000110504	Sub1	protein_coding	cds	GGT	GAG	chr15	-	237.5	42	-85	11991028	11991026	35.1537	25.7934	17.8979	29.3634	41.3507	31.7604	102.475	78.8449	3	3	0
ENSMUSG00000022234	8131	ENSMUST00000022842	Cct5	protein_coding	cds	GGA	GAA	chr15	-	1707	535.5	-5.5	31590989	31590987	27.9038	24.3072	19.8177	47.0126	128.942	146.727	322.682	72.0287	3	3	0
ENSMUSG00000022285	8222	ENSMUST00000022894, ENSMUST00000110361, ENSMUST00000110362	Ywhaz	protein_coding	cds	GCT	TCG	chr15	-	780.667	108	-137	36776340	36776338	11.9785	17.673	19.4976	11.2527	11.1263	16.4462	38.8251	49.1491	3	3	0
ENSMUSG00000022312	8270	ENSMUST00000022925	Eif3h	protein_coding	cds	ATA	AAA	chr15	-	528	154	-198	51797666	51797664	10.1243	15.7963	20.4964	45.1359	39.8477	25.4014	110.385	46.417	3	3	0
ENSMUSG00000022816	9512	ENSMUST00000114763	Fstl1	protein_coding	cds	CCT	GAG	chr16	+	958	226	-80	37828809	37828811	11.3137	14.2744	15.2911	53.7269	50.7322	16.2635	120.723	40.8791	3	3	0
ENSMUSG00000022841	9356	ENSMUST00000090023, ENSMUST00000007216	Ap2m1	protein_coding	5utr	NA	NA	chr16	+	165	-2	-1306	20537659	20537661	11.6146	11.3715	12.6517	24.5745	25.7966	14.4267	64.7978	35.6379	3	3	0
ENSMUSG00000022841	9360	ENSMUST00000126788	Ap2m1	nonsense_mediated_decay	5utr	NA	NA	chr16	+	48	-2	-250	20540024	20540026	13.7193	13.066	12.6517	27.0799	30.1308	19.5282	76.7388	39.4371	3	3	0
ENSMUSG00000023004	8828	ENSMUST00000077577	Tuba1b	protein_coding	cds	GAT	GCT	chr15	-	521	96.5	-354.5	98932776	98932774	21.1813	16.941	13.9376	22.0231	32.4556	26.1357	80.6143	52.0599	3	3	0
ENSMUSG00000023175	1662	ENSMUST00000178383	Bsg	protein_coding	cds	GCG	GAA	chr10	+	540	179.5	-17	79710894	79710896	20.0606	53.3062	22.4667	39.8447	35.1758	19.989	95.0094	95.8335	3	3	0
ENSMUSG00000023175	1663	ENSMUST00000179781, ENSMUST00000067036, ENSMUST00000105381	Bsg	protein_coding	cds	CGG	AAG	chr10	+	841	255.833	-37.5	79710895	79710897	19.4048	57.4857	25.0086	44.0825	50.8682	26.2627	121.213	101.899	3	3	0
ENSMUSG00000023456	18765	ENSMUST00000172132	Tpi1	protein_coding	cds	AAG	AAG	chr6	-	228	68	-231	124814069	124814067	36.1636	98.7838	55.1714	95.38	193.003	107.654	396.037	190.119	3	3	0
ENSMUSG00000023944	10680	ENSMUST00000024739, ENSMUST00000165127	Hsp90ab1	protein_coding	cds	ATT	GAC	chr17	-	1101	335	-107.5	45569041	45569039	26.8167	46.8893	25.7255	71.0611	96.5381	59.4738	227.073	99.4316	3	3	0
ENSMUSG00000023944	10703	ENSMUST00000024739, ENSMUST00000166469	Hsp90ab1	protein_coding	cds	GGC	GAA	chr17	-	680.5	194.5	-261.5	45570312	45570310	34.37	55.6061	35.2457	82.068	18.3331	11.7832	112.184	125.222	3	3	0
ENSMUSG00000023944	10737	ENSMUST00000163966	Hsp90ab1	nonsense_mediated_decay	cds	TGG	AGG	chr17	-	392	100.5	-11	45571427	45571425	29.0777	46.2681	29.3012	71.1916	73.6164	28.869	173.677	104.647	3	3	0
ENSMUSG00000023944	10738	ENSMUST00000024739	Hsp90ab1	protein_coding	cds	ATG	GAG	chr17	-	444	113	-611	45571428	45571426	28.7232	46.9773	29.7653	72.378	77.8204	33.792	183.99	105.466	3	3	0
ENSMUSG00000023944	10747	ENSMUST00000024739, ENSMUST00000163966, ENSMUST00000130406	Hsp90ab1	protein_coding, nonsense_mediated_decay	cds	AAG	TTG	chr17	-	294.333	63	-240.667	45571578	45571576	16.2488	23.8157	14.3259	23.6494	27.5202	11.5559	62.7255	54.3904	3	3	0
ENSMUSG00000024359	11177	ENSMUST00000025217	Hspa9	protein_coding	cds	GAT	GGA	chr18	-	1535	476	-203	34940927	34940925	10.1294	10.8012	10.4608	20.4052	43.0838	25.9769	89.4659	31.3914	3	3	0
ENSMUSG00000024587	11454	ENSMUST00000025483	Nars	protein_coding	cds	AAA	GAA	chr18	-	1398	415.5	-142	64501861	64501859	25	28.3061	18.1491	16.7904	12.312	16.3454	45.4478	71.4552	3	3	0
ENSMUSG00000024740	12042	ENSMUST00000025649	Ddb1	protein_coding	cds	AGT	GGT	chr19	+	3730	1117	-23	10629388	10629390	20.6595	32.0038	19	34.0149	21.2506	39.216	94.4815	71.6633	3	3	0
ENSMUSG00000024826	11692	ENSMUST00000136983	Dpf2	protein_coding	cds	GAT	GAC	chr19	-	579	159.5	-231	5904532	5904530	31.9593	17.4574	15.1003	64.1897	28.7557	14.6057	107.551	64.5169	3	3	0
ENSMUSG00000024966	11816	ENSMUST00000025918	Stip1	protein_coding	cds	GCC	AAG	chr19	-	829	250	-293	7029216	7029214	28.6933	47.5089	29.4253	39.8982	22.496	25.9689	88.363	105.627	3	3	0
ENSMUSG00000025068	12343	ENSMUST00000026050	Gsto1	protein_coding	cds	CCT	TTG	chr19	+	491	123.5	-116	47859437	47859439	13.5677	10.2673	16.7185	24.3968	19.4809	29.6088	73.4865	40.5536	3	3	0
ENSMUSG00000025290	7416	ENSMUST00000169826	Rps24	protein_coding	cds	CTG	CTT	chr14	+	86	15.5	-114.5	24491757	24491759	13.2162	17.1868	12.1873	18.2182	14.1386	16.6669	49.0236	42.5903	3	3	0
ENSMUSG00000025290	7420	ENSMUST00000112384	Rps24	protein_coding	cds	CTG	CTT	chr14	+	123	15.5	-114.5	24491794	24491796	13.2162	17.1868	12.1873	18.2182	14.2454	16.8034	49.267	42.5903	3	3	0
ENSMUSG00000025290	7438	ENSMUST00000169826	Rps24	protein_coding	cds	CCT	AAA	chr14	+	296	86	-44	24492058	24492060	47.9532	70.5271	59.3303	102.6	29.6509	10.5499	142.801	177.811	3	3	0
ENSMUSG00000025290	7443	ENSMUST00000112384	Rps24	protein_coding	cds	CCT	AAA	chr14	+	333	86	-44	24492095	24492097	47.9532	70.5271	59.3303	102.6	29.6509	10.5499	142.801	177.811	3	3	0
ENSMUSG00000025381	2428	ENSMUST00000026446	Cnpy2	protein_coding	cds	GAT	GAA	chr10	+	193	34.5	-147	128322651	128322653	15.2798	44.7799	16.9706	71.7932	29.9675	11.4848	113.245	77.0302	3	3	0
ENSMUSG00000025393	2408	ENSMUST00000026459	Atp5b	protein_coding	cds	GAT	GAC	chr10	+	1146	364	-165	128088338	128088340	11.6737	11.6736	10.863	13.9497	28.2265	33.0519	75.2282	34.2103	3	3	0
ENSMUSG00000025393	2413	ENSMUST00000026459	Atp5b	protein_coding	cds	AAC	ATT	chr10	+	1284	410	-119	128088476	128088478	36.2415	28.496	27.5256	76.588	60.2141	29.2412	166.043	92.2631	3	3	0
ENSMUSG00000025613	9631	ENSMUST00000026704, ENSMUST00000175977	Cct8	protein_coding	cds	GGA	GAG	chr16	-	1232	396.5	-122	87485840	87485838	15.1417	20.4771	11.6624	16.7334	37.6889	14.0542	68.4765	47.2812	3	3	0
ENSMUSG00000025809	21731	ENSMUST00000090006	Itgb1	protein_coding	cds	AAC	TCT	chr8	+	1431	374.5	-423	128717671	128717673	14.9755	17.2975	18.2979	31.7761	38.825	32.8484	103.449	50.5709	3	3	0
ENSMUSG00000025809	21732	ENSMUST00000124826	Itgb1	nonsense_mediated_decay	3utr	NA	NA	chr8	+	1106	902	726	128717672	128717674	13.9738	18.6339	21.4115	25.5238	38.0165	30.5996	94.1398	54.0192	3	3	0
ENSMUSG00000025823	18074	ENSMUST00000077290	Pdia4	protein_coding	cds	CCT	GAA	chr6	-	639	170.5	-470	47807038	47807036	17.3505	32.0677	18.2669	29.8943	27.4581	41.2899	98.6423	67.6852	3	3	0
ENSMUSG00000025967	374	ENSMUST00000126795	Eef1b2	nonsense_mediated_decay	cds	ACC	TGC	chr1	+	123	41	-52	63177807	63177809	12.9868	17.5598	13.4257	40.5167	30.8882	10.6434	82.0483	43.9723	3	3	0
ENSMUSG00000025979	299	ENSMUST00000162364, ENSMUST00000027122, ENSMUST00000161122	Mob4	protein_coding, nonsense_mediated_decay	cds	GAT	GAA	chr1	+	111.333	28	-123	55136694	55136696	26.7849	25.0353	18.8651	39.6411	66.046	73.4	179.087	70.6852	3	3	0
ENSMUSG00000025979	300	ENSMUST00000162553	Mob4	protein_coding	5utr	NA	NA	chr1	+	325	-18	-576	55136695	55136697	19.4063	19.8774	15.7163	29.071	75.8069	86.1933	191.071	55	3	3	0
ENSMUSG00000025980	284	ENSMUST00000027123, ENSMUST00000127861, ENSMUST00000144077	Hspd1	protein_coding	cds	TAC	AAA	chr1	-	469	89	-216	55084693	55084691	18.5869	37.7829	12.6629	45.5175	113.593	106.215	265.326	69.0328	3	3	0
ENSMUSG00000026020	343	ENSMUST00000027174, ENSMUST00000191142	Nop58	protein_coding	cds	GGA	CTT	chr1	+	1203	338	-152	59705699	59705701	63.8115	40.1922	31.3068	56.8734	91.0426	60.0336	207.95	135.31	3	3	0
ENSMUSG00000026020	344	ENSMUST00000187837, ENSMUST00000188390	Nop58	protein_coding	cds	GAC	TTA	chr1	+	198	65.5	-137	59705700	59705702	63.127	38.751	33.582	58.0684	91.4893	60.4911	210.049	135.46	3	3	0
ENSMUSG00000026238	661	ENSMUST00000045897, ENSMUST00000186255, ENSMUST00000188533	Ptma	protein_coding	cds	GAC	TTG	chr1	+	194.667	15	-74	86526950	86529174	17.4307	12.2941	10.2792	15.7099	31.0122	47.404	94.1261	40.0041	3	3	0
ENSMUSG00000026238	678	ENSMUST00000186255	Ptma	protein_coding	3utr	NA	NA	chr1	+	404	233	57	86530007	86530009	22.5428	44.3362	42.1612	98.6826	58.3732	21.4276	178.483	109.04	3	3	0
ENSMUSG00000026238	679	ENSMUST00000186255	Ptma	protein_coding	3utr	NA	NA	chr1	+	405	234	58	86530008	86530010	17.8547	27.6124	19.7238	62.3791	179.408	93.779	335.566	65.1909	3	3	0
ENSMUSG00000026341	802	ENSMUST00000191578	Actr3	nonsense_mediated_decay	3utr	NA	NA	chr1	-	1112	958	833	125395145	125395143	14.6071	16.5044	11.8772	26.4397	28.6667	15.2461	70.3524	42.9887	3	3	0
ENSMUSG00000026341	803	ENSMUST00000178474, ENSMUST00000027579	Actr3	protein_coding	cds	CCT	ATT	chr1	-	1296	361	-57	125395146	125395144	18.0739	14.1857	15.9508	36.1151	39.396	30.3959	105.907	48.2104	3	3	0
ENSMUSG00000026341	822	ENSMUST00000178474, ENSMUST00000188497, ENSMUST00000191544, ENSMUST00000191004, ENSMUST00000187460, ENSMUST00000185280, ENSMUST00000027579, ENSMUST00000191578	Actr3	protein_coding, nonsense_mediated_decay	cds, 3utr	CCA, NA	CTG, NA	chr1	-	464.6	96.1333	-120.133	125408607	125408605	17.9694	18.5048	21.2022	40.7622	21.9175	18.6137	81.2935	57.6765	3	3	0
ENSMUSG00000026701	1024	ENSMUST00000192639	Prdx6	nonsense_mediated_decay	3utr	NA	NA	chr1	-	331	260	30	161243703	161243701	16.7345	23.8505	13.8399	34.4409	55.6628	24.6418	114.746	54.4249	3	3	0
ENSMUSG00000026701	1025	ENSMUST00000071718, ENSMUST00000051925	Prdx6	protein_coding	cds	GAC	AAG	chr1	-	549	127	-85	161243704	161243702	19.6542	31.465	18.7763	47.1235	74.1943	39.6792	160.997	69.8954	3	3	0
ENSMUSG00000026727	12435	ENSMUST00000028059, ENSMUST00000137670	Rsu1	protein_coding	cds	CCA	AAT	chr2	-	325	55.5	-138	13224418	13224416	13.1762	16.6667	13.9064	41.025	58.6084	20.4315	120.065	43.7493	3	3	0
ENSMUSG00000026864	12753	ENSMUST00000028222, ENSMUST00000100171	Hspa5	protein_coding	cds	AAC	ACG	chr2	+	518.5	90	-565	34772703	34772705	15.8194	18.8397	15.8739	23.0428	21.53	14.3268	58.8995	50.533	3	3	0
ENSMUSG00000027067	13014	ENSMUST00000077798, ENSMUST00000130729, ENSMUST00000168266	Ssrp1	protein_coding	cds	CGC	GAA	chr2	+	436.667	77	-602.667	85038529	85038531	24.4099	25.3644	15.2054	32.7423	22.5096	24.4057	79.6576	64.9796	3	3	0
ENSMUSG00000027067	13021	ENSMUST00000077798, ENSMUST00000130729, ENSMUST00000168266	Ssrp1	protein_coding	cds	GGT	GAA	chr2	+	1657.67	484	-195.667	85042972	85042974	23.4961	15.7512	16.2712	37.4174	51.948	53.5527	142.918	55.5185	3	3	0
ENSMUSG00000027133	13182	ENSMUST00000028553	Nop10	protein_coding	cds	TTC	AAG	chr2	+	251	51	-13	112262411	112262413	35.7089	32.899	25.6414	25.7975	26.9587	12.1672	64.9234	94.2493	3	3	0
ENSMUSG00000027170	13165	ENSMUST00000028592	Eif3m	protein_coding	cds	GAC	AAG	chr2	-	321	76	-298	105013831	105013829	15.4303	19.4132	25.7992	28.5334	93.7336	134.338	256.605	60.6427	3	3	0
ENSMUSG00000027184	13130	ENSMUST00000028607, ENSMUST00000111147	Caprin1	protein_coding	cds	CAG	CCT	chr2	-	1345.5	390	-317	103775472	103775470	13.5184	23.9858	33.6465	13.1647	15.8502	11.7298	40.7446	71.1507	3	3	0
ENSMUSG00000027239	13086	ENSMUST00000028672, ENSMUST00000069423, ENSMUST00000090602, ENSMUST00000111309	Mdk	protein_coding	cds	ACC	AAA	chr2	-	561.75	130	-10	91930825	91930823	16.8333	25.3067	21.9103	39.5599	37.3644	12.3868	89.3111	64.0503	3	3	0
ENSMUSG00000027248	13245	ENSMUST00000028683	Pdia3	protein_coding	cds	AAC	TTG	chr2	+	1341	359	-146	121434033	121434035	19.5059	21.5453	17.3403	45.9217	20.2655	16.7269	82.9141	58.3916	3	3	0
ENSMUSG00000027342	13398	ENSMUST00000028817	Pcna	protein_coding	cds	TCG	GGT	chr2	-	698	139.5	-121	132251406	132251404	16.1276	15.7185	12.965	18.0273	24.1138	10.1621	52.3033	44.8111	3	3	0
ENSMUSG00000027404	13314	ENSMUST00000147570	Snrpb	nonsense_mediated_decay	3utr	NA	NA	chr2	-	982	814	602	130171938	130171936	19.799	21.3233	18.5533	56.566	56.0783	15.7762	128.42	59.6756	3	3	0
ENSMUSG00000027405	13355	ENSMUST00000141872	Nop56	protein_coding	cds	AGT	TAA	chr2	+	492	164	-8	130276072	130276074	38.1366	36.1035	23.328	69.9844	84.1333	27.3826	181.5	97.5681	3	3	0
ENSMUSG00000027405	13356	ENSMUST00000103198, ENSMUST00000136621	Nop56	protein_coding	cds	GTT	AAA	chr2	+	499.5	155.5	-264.5	130276073	130276075	41.7472	37.2706	21.9474	71.6473	74.8554	26.0846	172.587	100.965	3	3	0
ENSMUSG00000027447	13449	ENSMUST00000028938	Cst3	protein_coding	cds	CCC	TGG	chr2	-	571	124	-16	148872011	148872009	15.308	21.0154	14.9674	42.6998	59.7447	38.4146	140.859	51.2908	3	3	0
ENSMUSG00000027642	13667	ENSMUST00000116380, ENSMUST00000029171	Rpn2	protein_coding	cds	TAT	GAC	chr2	+	1207.5	329	-294	157302454	157302456	13.09	24.8782	13.2408	43.4422	72.1912	54.0313	169.665	51.2089	3	3	0
ENSMUSG00000028034	15148	ENSMUST00000106121	Fubp1	protein_coding	cds	GAC	AGG	chr3	+	1044	324	-318	152220732	152220734	21.2592	18.8718	14.1842	30.4713	32.451	20.1246	83.047	54.3151	3	3	0
ENSMUSG00000028034	15150	ENSMUST00000166984	Fubp1	protein_coding	cds	GAC	AGG	chr3	+	1143	324	-318	152220768	152220770	13.787	15.8796	17.2923	34.4355	26.1237	17.3532	77.9124	46.9588	3	3	0
ENSMUSG00000028081	14301	ENSMUST00000029722	Rps3a1	protein_coding	cds	AAG	AAA	chr3	-	187	18	-246	86142516	86142514	20.6357	68.9	33.374	61.3649	32.2086	29.0756	122.649	122.91	3	3	0
ENSMUSG00000028187	15140	ENSMUST00000029838	Rpf1	protein_coding	cds	TGG	AAA	chr3	-	240	68.5	-280	146521184	146521182	18.0739	38.8909	11.3137	33.2285	60.0512	14.2066	107.486	68.2785	3	3	0
ENSMUSG00000028452	15323	ENSMUST00000030164	Vcp	protein_coding	cds	GCT	ATC	chr4	-	2222	631	-175	42982952	42982950	15.7619	14.8284	11.7798	38.2204	27.5104	14.799	80.5298	42.3701	3	3	0
ENSMUSG00000028455	15352	ENSMUST00000030169, ENSMUST00000136326, ENSMUST00000138030	Stoml2	protein_coding	cds	CCT	CGA	chr4	-	649	169.667	-114	43029800	43029798	12.9167	16.6214	11.17	31.305	64.002	72.8415	168.148	40.7082	3	3	0
ENSMUSG00000028455	15353	ENSMUST00000135660	Stoml2	protein_coding	cds	ACC	TCG	chr4	-	423	141	-145	43029801	43029799	10.6667	17.5434	10.6534	27.4712	52.2423	49.6667	129.38	38.8635	3	3	0
ENSMUSG00000028691	15695	ENSMUST00000135573, ENSMUST00000151129, ENSMUST00000129315, ENSMUST00000106470, ENSMUST00000030454	Prdx1	protein_coding	cds	CCA	GAT	chr4	+	240.6	21	-152	116687480	116687482	19.7203	13.2866	10.3548	14.8844	11.5989	10.9865	37.4699	43.3617	3	3	0
ENSMUSG00000028691	15711	ENSMUST00000135573, ENSMUST00000151129, ENSMUST00000106470, ENSMUST00000030454	Prdx1	protein_coding	cds	AAA	GGT	chr4	+	554.25	135	-50.75	116693738	116693740	20.7907	11.1667	18.2574	29.5539	15.2665	10.0683	54.8886	50.2148	3	3	0
ENSMUSG00000028820	15946	ENSMUST00000030623	Sfpq	protein_coding	cds	GGA	GAA	chr4	+	933	279.5	-419	127022851	127022853	31.9457	35.7799	12.5964	62.8312	151.753	148.818	363.402	80.322	3	3	0
ENSMUSG00000029169	16648	ENSMUST00000031061	Dhx15	protein_coding	cds	CCA	CAG	chr5	-	2477	770.5	-24	52150741	52150739	11.2549	19.1612	14.8492	15.0898	28.267	45.1309	88.4876	45.2653	3	3	0
ENSMUSG00000029198	16593	ENSMUST00000031099	Grpel1	protein_coding	cds	TAC	GAA	chr5	+	712	172	-45	36471264	36471266	12.2751	11.7883	13.771	34.5845	27.7513	14.8241	77.1599	37.8345	3	3	0
ENSMUSG00000029201	16753	ENSMUST00000131263	Ugdh	protein_coding	cds	GGA	TTA	chr5	-	246	54.5	-101	65424128	65424126	11.4942	11.2788	10.5303	24.0122	17.2993	24.7765	66.088	33.3032	3	3	0
ENSMUSG00000029247	16815	ENSMUST00000031160, ENSMUST00000120912, ENSMUST00000117536	Paics	protein_coding	cds	GAT	GAG	chr5	+	1241.33	306	-119	76964588	76964590	31.5827	38.6578	16.6065	24.6322	36.7111	34.977	96.3204	86.8469	3	3	0
ENSMUSG00000029430	17344	ENSMUST00000031383, ENSMUST00000111343	Ran	protein_coding	cds	GAT	GAG	chr5	+	874	210	-6	129022797	129022799	22.7124	30.4861	23.2148	51.9563	10.4875	11.1686	73.6124	76.4132	3	3	0
ENSMUSG00000029580	17552	ENSMUST00000100497, ENSMUST00000167721	Actb	protein_coding	cds	ATG	TGG	chr5	-	1025	314	-21	142903864	142903862	18.7983	34.5963	25.9582	36.8079	60.9425	73.6968	171.447	79.3528	3	3	0
ENSMUSG00000029580	17560	ENSMUST00000100497, ENSMUST00000167721	Actb	protein_coding	cds	GCT	CCT	chr5	-	923	280	-55	142904091	142904089	16.33	36.0982	39.1906	27.2342	42.5434	38.7653	108.543	91.6189	3	3	0
ENSMUSG00000029580	17565	ENSMUST00000100497, ENSMUST00000167721	Actb	protein_coding	cds	GGT	GGT	chr5	-	863	260	-75	142904151	142904149	32.2745	34.3539	33.5851	53.6874	44.974	31.1898	129.851	100.214	3	3	0
ENSMUSG00000029580	17569	ENSMUST00000100497, ENSMUST00000167721	Actb	protein_coding	cds	CAT	GAA	chr5	-	785	234	-101	142904229	142904227	31.3714	39.4044	17.8262	61.5422	149.05	249.754	460.347	88.602	3	3	0
ENSMUSG00000029580	17577	ENSMUST00000100497, ENSMUST00000167721, ENSMUST00000171419	Actb	protein_coding	cds	ATG	GCC	chr5	-	698.333	199.333	-112	142904468	142904466	10.9555	10.234	10.7024	13.9195	27.5281	16.6022	58.0498	31.8919	3	3	0
ENSMUSG00000029580	17588	ENSMUST00000100497, ENSMUST00000167721, ENSMUST00000171419	Actb	protein_coding	cds	ATG	AAG	chr5	-	587.333	161.833	-149.5	142904579	142904577	12.2967	20.433	10.4178	20.6155	58.5708	94.9351	174.121	43.1475	3	3	0
ENSMUSG00000029580	17599	ENSMUST00000100497, ENSMUST00000167721, ENSMUST00000171419, ENSMUST00000163829	Actb	protein_coding	cds	GTG	ATG	chr5	-	450	118.5	-141.75	142904693	142904691	11.001	19.6599	11.2745	26.2798	81.1662	66.4844	173.93	41.9355	3	3	0
ENSMUSG00000029580	17626	ENSMUST00000163829, ENSMUST00000106216, ENSMUST00000100497, ENSMUST00000171419	Actb	protein_coding	cds	CCT	AGG	chr5	-	215	37.75	-186	142905576	142905574	31.4677	31.63	35.443	74.7294	17.1169	10.5082	102.354	98.5407	3	3	0
ENSMUSG00000029614	17165	ENSMUST00000031617	Rpl6	protein_coding	cds	ACC	AAG	chr5	+	324	84	-212	121205657	121205659	35.6982	68.5311	33.3944	67.0056	29.8035	16.6769	113.486	137.624	3	3	0
ENSMUSG00000029614	17178	ENSMUST00000031617	Rpl6	protein_coding	cds	CCT	CTG	chr5	+	648	192	-104	121208413	121208415	10.7371	11.0065	11.9522	14.7271	25.8795	39.3479	79.9544	33.6959	3	3	0
ENSMUSG00000029616	17195	ENSMUST00000130451	Erp29	protein_coding	cds	GGC	GAC	chr5	-	460	98	-164	121445568	121445566	15.7494	17.5798	15.1667	17.7366	44.4649	38.7906	100.992	48.4959	3	3	0
ENSMUSG00000030417	19737	ENSMUST00000118501	Pdcd5	protein_coding	cds	GGT	GAT	chr7	-	222	24	-102	35646176	35646174	42.7333	53.9636	20.2954	42.8342	24.7684	34.4229	102.025	116.992	3	3	0
ENSMUSG00000030541	19959	ENSMUST00000107384, ENSMUST00000134328, ENSMUST00000125542	Idh2	protein_coding, nonsense_mediated_decay	cds	GAT	GAG	chr7	-	306	86.4	-181.2	80100762	80100760	18.5352	10.7372	11.1026	32.2214	25.3421	17.1938	74.7573	40.3749	3	3	0
ENSMUSG00000030744	20078	ENSMUST00000032998	Rps3	protein_coding	cds	ATC	ATG	chr7	-	678	186.5	-56.5	99479448	99479446	21.1729	23.7126	16.4337	25.028	47.3288	32.3933	104.75	61.3192	3	3	0
ENSMUSG00000030751	20307	ENSMUST00000033008, ENSMUST00000135570	Psma1	protein_coding	cds	GAT	GAT	chr7	-	767	213	-37.5	114266491	114266489	15.2381	11.7169	14.1394	19.7773	10.5861	11.2124	41.5759	41.0943	3	3	0
ENSMUSG00000030867	20443	ENSMUST00000033154	Plk1	protein_coding	cds	GAG	GAC	chr7	+	464	120	-483	122159900	122159902	27.4569	31.9261	39.2098	31.9478	13.1474	13.2673	58.3626	98.5928	3	3	0
ENSMUSG00000031029	20222	ENSMUST00000033342	Eif3f	protein_coding	cds	GAT	GAC	chr7	+	987	324	-37	108940971	108940973	11.5718	19.9891	12.5451	30.2578	49.3195	21.4905	101.068	44.106	3	3	0
ENSMUSG00000031146	23562	ENSMUST00000033486	Plp2	protein_coding	cds	ACT	GAC	chrX	-	401	83	-69	7669606	7669604	12.1221	20.2978	12.7077	44.4833	34.8402	16.4638	95.7873	45.1276	3	3	0
ENSMUSG00000031246	24102	ENSMUST00000033598	Sh3bgrl	protein_coding	cds	TTT	GAA	chrX	+	474	82	-32	109154320	109154322	13.009	19.7293	10.0965	33.5741	36.4896	44.1915	114.255	42.8348	3	3	0
ENSMUSG00000031633	20986	ENSMUST00000034049	Slc25a4	protein_coding	cds	GAT	GAG	chr8	-	1235	290.5	-7	46207487	46207485	12.0221	20.1256	11.3371	17.7694	25.1785	38.5175	81.4654	43.4848	3	3	0
ENSMUSG00000031697	21344	ENSMUST00000034132	Orc6	protein_coding	cds	AAC	TTG	chr8	+	470	110.5	-151	85301217	85301219	17.1938	31.5552	16.8158	31.305	62.9182	46.9986	141.222	65.5648	3	3	0
ENSMUSG00000031697	21345	ENSMUST00000170141	Orc6	protein_coding	cds	AAC	TTG	chr8	+	442	34.5	-151	85302876	85302878	17.1938	31.5552	16.8158	31.305	55.7487	41.0522	128.106	65.5648	3	3	0
ENSMUSG00000031972	21698	ENSMUST00000034453	Acta1	protein_coding	cds	AAG	TAC	chr8	-	279	69	-308	123893378	123893376	29.1667	37.9723	24.8835	50.3671	86.6425	157.264	294.274	92.0224	3	3	0
ENSMUSG00000032115	22072	ENSMUST00000066601, ENSMUST00000162560, ENSMUST00000161318, ENSMUST00000160902	Hyou1	protein_coding, nonsense_mediated_decay	cds	AGG	AAA	chr9	+	362	64.5	-727.25	44381063	44381065	20.7626	22.1596	36.0752	26.0687	30.4696	16.9807	73.5189	78.9975	3	3	0
ENSMUSG00000032249	22492	ENSMUST00000135395, ENSMUST00000085519, ENSMUST00000128636	Anp32a	protein_coding	cds	CTG	AAG	chr9	+	440.667	104.333	-121.333	62372181	62372183	10.4608	18.1735	17.8441	17.9608	34.3949	15.349	67.7047	46.4784	3	3	0
ENSMUSG00000032294	22361	ENSMUST00000163694	Pkm	protein_coding	cds	GAG	ATC	chr9	+	441	117	-414	59665358	59665360	56.0508	60.8276	48.8259	72.9188	145.098	70.652	288.669	165.704	3	3	0
ENSMUSG00000032294	22377	ENSMUST00000034834	Pkm	protein_coding	cds	GAG	ATC	chr9	+	646	117	-414	59668653	59668655	53.2422	52.0619	41.6955	63.804	138.49	65.6478	267.942	147	3	3	0
ENSMUSG00000032294	22379	ENSMUST00000163694	Pkm	protein_coding	cds	AAT	GGT	chr9	+	684	198	-333	59668923	59668925	34.9652	47.0111	29.0958	79.5122	101.981	63.2105	244.703	111.072	3	3	0
ENSMUSG00000032294	22391	ENSMUST00000034834	Pkm	protein_coding	cds	AAT	GGT	chr9	+	889	198	-333	59670495	59670497	32.7893	42.9317	26.4155	73.4697	94.9939	58.2336	226.697	102.137	3	3	0
ENSMUSG00000032294	22444	ENSMUST00000034834	Pkm	protein_coding	cds	ACA	GAA	chr9	+	1519	407.5	-123.5	59675651	59675653	14.6559	25.6324	14.1915	54.0143	69.5096	62.9293	186.453	54.4798	3	3	0
ENSMUSG00000032301	22296	ENSMUST00000172407, ENSMUST00000034848, ENSMUST00000171900	Psma4	protein_coding	cds	AAC	GTT	chr9	+	477.333	83	-120	54954702	54954704	10.3648	13.2614	12.7756	18.6018	19.1075	19.2658	56.9751	36.4018	3	3	0
ENSMUSG00000032423	22823	ENSMUST00000069221, ENSMUST00000174688, ENSMUST00000174391, ENSMUST00000174269, ENSMUST00000173801, ENSMUST00000174282, ENSMUST00000174361	Syncrip	protein_coding	cds	CCA	GAT	chr9	-	1334.57	367.214	-171.286	88461726	88461724	11.6668	13.4429	15.9838	30.7934	48.4614	24.024	103.279	41.0936	3	3	0
ENSMUSG00000032481	23108	ENSMUST00000088716	Smarcc1	protein_coding	cds	GGT	GAA	chr9	+	1445	435.5	-668	110183013	110183015	25.2203	25.2007	23	26.6814	115.983	46.9376	189.602	73.421	3	3	0
ENSMUSG00000032518	23153	ENSMUST00000035105	Rpsa	protein_coding	cds	AAC	CTT	chr9	+	259	28	-267	120129185	120129187	13.0479	10.7672	17.2384	27.6406	66.8634	42.1931	136.697	41.0534	3	3	0
ENSMUSG00000032518	23157	ENSMUST00000035105	Rpsa	protein_coding	cds	GCT	GAC	chr9	+	388	71	-224	120130155	120130157	24.6748	27.3405	25.39	43.9912	62.9454	31.6961	138.633	77.4052	3	3	0
ENSMUSG00000032966	13466	ENSMUST00000044011	Fkbp1a	protein_coding	cds	AAC	AAG	chr2	+	354	43	-65	151557429	151557431	20.6692	12.8511	16.1962	27.3811	32.7228	10.8825	70.9864	49.7165	3	3	0
ENSMUSG00000033047	8473	ENSMUST00000040518	Eif3l	protein_coding	cds	GAG	GCA	chr15	+	420	112.5	-451	79079002	79079004	11.2124	17.5547	13.9525	17.5762	27.0465	29.6298	74.2525	42.7196	3	3	0
ENSMUSG00000034088	735	ENSMUST00000170883, ENSMUST00000189025	Hdlbp	protein_coding	5utr	NA	NA	chr1	-	21	-306	-2403	93478788	93478786	18.9843	12.3455	11.6411	12.7739	10.8479	17.2596	40.8813	42.9709	3	3	0
ENSMUSG00000034994	1858	ENSMUST00000047864	Eef2	protein_coding	cds	GAG	GAG	chr10	+	609	170.5	-687	81178793	81178795	29.5565	30.9931	13.573	61	19.5678	19.1197	99.6875	74.1226	3	3	0
ENSMUSG00000035150	23926	ENSMUST00000050328, ENSMUST00000113922	Eif2s3x	protein_coding	cds	TTC	AAA	chrX	-	251	68	-340	94209593	94209591	35.5082	57.3916	30.9687	26.2858	18.5267	17.3706	62.1831	123.869	3	3	0
ENSMUSG00000035215	1822	ENSMUST00000035775	Lsm7	protein_coding	cds	GAT	GAC	chr10	-	197	58	-45	80853096	80853094	30.261	41.4282	17.1464	51.1399	66.4706	31.1325	148.743	88.8357	3	3	0
ENSMUSG00000035443	21896	ENSMUST00000039161	Thyn1	protein_coding	cds	CCA	GAA	chr9	+	296	63	-163	27003697	27003699	14.7885	14.3257	13	24.5395	20.4959	15.6157	60.6511	42.1141	3	3	0
ENSMUSG00000036181	6549	ENSMUST00000040914	H1f2	protein_coding	cds	GGC	GTG	chr13	+	206	54.5	-157	23739013	23739015	15.2678	15.1549	15.7487	21.5976	23.3263	25.9513	70.8752	46.1714	3	3	0
ENSMUSG00000036181	6561	ENSMUST00000040914	H1f2	protein_coding	cds	GGT	GCT	chr13	+	467	142	-70	23739274	23739276	18.6048	21.8364	12.6499	23.3547	53.3485	42.9743	119.677	53.0912	3	3	0
ENSMUSG00000037242	16166	ENSMUST00000037099	Clic4	protein_coding	cds	CTC	GAA	chr4	-	507	94	-159	135226050	135226048	24.9408	20.0189	23.6969	55.6996	50.0867	45.0016	150.788	68.6566	3	3	0
ENSMUSG00000037361	4952	ENSMUST00000046207	Sf3b6	protein_coding	cds	CCT	GAA	chr12	+	288	14	-111	4820669	4820671	20.3422	22.8246	11.009	33.1689	33.9026	15.7476	82.8191	54.1758	3	3	0
ENSMUSG00000037742	22717	ENSMUST00000042235	Eef1a1	protein_coding	cds	GCT	CAG	chr9	-	1491	457	-5	78478752	78478750	15.142	21.222	13.2028	27.4032	81.4316	93.3975	202.232	49.5669	3	3	0
ENSMUSG00000037742	22723	ENSMUST00000042235	Eef1a1	protein_coding	cds	CCA	CTT	chr9	-	1377	419	-43	78478965	78478963	43.3065	47.6805	43.6615	89.687	63.3025	49.8871	202.877	134.648	3	3	0
ENSMUSG00000037742	22725	ENSMUST00000042235	Eef1a1	protein_coding	cds	AAG	CCC	chr9	-	1341	407	-55	78479001	78478999	19.2876	23.4059	23.7698	35.7952	26.7022	17.8555	80.3529	66.4633	3	3	0
ENSMUSG00000037742	22735	ENSMUST00000042235	Eef1a1	protein_coding	cds	CAC	ATA	chr9	-	1218	366	-96	78479124	78479122	14.5983	21.053	11.6961	34.3482	33.2954	48.5475	116.191	47.3474	3	3	0
ENSMUSG00000037742	22750	ENSMUST00000042235	Eef1a1	protein_coding	cds	GTC	AAT	chr9	-	966	282	-180	78479461	78479459	16.4174	15.0512	13.3105	20.7683	40.8121	25.6174	87.1979	44.779	3	3	0
ENSMUSG00000037742	22754	ENSMUST00000042235	Eef1a1	protein_coding	cds	GGC	ACT	chr9	-	897	259	-203	78479530	78479528	13.331	18.7807	21.3304	37.6665	61.2501	19.8233	118.74	53.4422	3	3	0
ENSMUSG00000037742	22776	ENSMUST00000042235, ENSMUST00000154207, ENSMUST00000156988	Eef1a1	protein_coding	cds	TAC	AGT	chr9	-	622.667	161	-137.333	78479990	78479988	23.162	22.3993	18.1566	21.7074	54.7399	51.8169	128.264	63.718	3	3	0
ENSMUSG00000037742	22792	ENSMUST00000042235, ENSMUST00000154207, ENSMUST00000156988	Eef1a1	protein_coding	cds	CCA	GGA	chr9	-	415.667	92	-206.333	78480289	78480287	32.8784	23.7802	36.4982	29.1243	13.6257	27.3177	70.0677	93.1569	3	3	0
ENSMUSG00000037742	22793	ENSMUST00000042235, ENSMUST00000154207, ENSMUST00000156988	Eef1a1	protein_coding	cds	GCC	CCA	chr9	-	412.667	91	-207.333	78480292	78480290	15.2421	17.0785	26.969	24.1579	27.1299	19.0597	70.3475	59.2896	3	3	0
ENSMUSG00000037742	22810	ENSMUST00000042235, ENSMUST00000154207, ENSMUST00000156988	Eef1a1	protein_coding	cds	CAC	ATC	chr9	-	157.667	6	-292.333	78480637	78480635	11.4138	22.5269	10.7719	17.9175	31.0191	10.8215	59.758	44.7127	3	3	0
ENSMUSG00000038252	18876	ENSMUST00000043848, ENSMUST00000188762	Ncapd2	protein_coding, nonsense_mediated_decay	cds, 3utr	CAC, NA	TCA, NA	chr6	-	722	361.5	-476.5	125185723	125185721	21.3984	49.8487	29.8422	46.5554	44.5609	37.0071	128.123	101.089	3	3	0
ENSMUSG00000038502	19761	ENSMUST00000046575	Ptov1	protein_coding	cds	CTG	AAA	chr7	-	609	113.5	-302	44867243	44867241	11.4719	16.3313	17.1677	19.0762	23.3695	15.4323	57.878	44.9709	3	3	0
ENSMUSG00000038845	4091	ENSMUST00000125172, ENSMUST00000036374	Phb	protein_coding	cds	GGC	GAG	chr11	+	438	110	-129	95675221	95675223	15.3096	14.3752	11.9087	26.159	51.8049	42.8366	120.8	41.5935	3	3	0
ENSMUSG00000038900	12707	ENSMUST00000102811, ENSMUST00000126610	Rpl12	nonsense_mediated_decay, protein_coding	cds	AAC	GAG	chr2	+	144.333	6.66667	-104	32961823	32961825	32.1975	36.4596	45.6249	66.9889	69.2441	50.0344	186.267	114.282	3	3	0
ENSMUSG00000038965	9307	ENSMUST00000090192	Ube2l3	protein_coding	cds	AAC	CCT	chr16	-	157	41.5	-112.5	17160174	17160172	18.7528	25.0951	10.6667	38.5643	49.6733	52.3647	140.602	54.5146	3	3	0
ENSMUSG00000039209	9234	ENSMUST00000121292, ENSMUST00000044103	Rpl39l	protein_coding	cds	CTG	GCC	chr16	+	252	12	-39	10174345	10174347	38.3938	60.4476	35.8969	48.4046	66.5445	50.2872	165.236	134.738	3	3	0
ENSMUSG00000039209	9235	ENSMUST00000121292, ENSMUST00000044103	Rpl39l	protein_coding	cds	GCC	AAG	chr16	+	255	13	-38	10174348	10174350	14.0961	13.3702	11.1248	23.5265	14.4374	11.8058	49.7698	38.5911	3	3	0
ENSMUSG00000039221	14006	ENSMUST00000193168	Rpl22l1	nonsense_mediated_decay	3utr	NA	NA	chr3	+	399	373	179	28807269	28807271	11.8095	10.383	13.2972	17.2266	23.5329	25.4938	66.2533	35.4897	3	3	0
ENSMUSG00000039630	1191	ENSMUST00000161769, ENSMUST00000037748	Hnrnpu	nonsense_mediated_decay, protein_coding	cds	CCA	GAA	chr1	-	2153.5	653.5	-142.5	178330725	178330723	28.7984	59.1234	32.3215	65.3526	123.815	110.864	300.032	120.243	3	3	0
ENSMUSG00000039630	1208	ENSMUST00000161769, ENSMUST00000037748	Hnrnpu	nonsense_mediated_decay, protein_coding	cds	GAA	GAA	chr1	-	1238.5	349	-447.5	178333108	178333106	55.5464	72.3987	53.2203	99.0918	168.511	152.277	419.879	181.165	3	3	0
ENSMUSG00000039682	16632	ENSMUST00000046122	Lap3	protein_coding	cds	CCT	CTC	chr5	+	314	75.3333	-443.333	45496929	45496931	12.6622	19.8721	13.6781	36.1919	13.0306	10.0673	59.2898	46.2124	3	3	0
ENSMUSG00000040385	11605	ENSMUST00000046094	Ppp1ca	protein_coding	cds	GGC	AAG	chr19	+	440	96	-234	4193215	4193217	29.1883	49.4481	32.9584	70.8747	68.3837	69.2394	208.498	111.595	3	3	0
ENSMUSG00000040945	16281	ENSMUST00000071169, ENSMUST00000038893	Rcc2	protein_coding	cds	AGT	GAA	chr4	+	1495	397	-123	140717190	140717192	20.0429	17.9714	28.1281	45.3074	10.6145	12.4502	68.372	66.1424	3	3	0
ENSMUSG00000040952	19392	ENSMUST00000108430, ENSMUST00000129847, ENSMUST00000108428, ENSMUST00000153451, ENSMUST00000108429, ENSMUST00000156372, ENSMUST00000124035	Rps19	protein_coding, nonsense_mediated_decay	cds	CTG	AAA	chr7	+	221	33.7143	-111.857	24885461	24885463	110.912	154.706	156.073	222.659	116.314	29.8975	368.871	421.691	3	3	0
ENSMUSG00000040952	19421	ENSMUST00000108430, ENSMUST00000108428, ENSMUST00000153451, ENSMUST00000108429, ENSMUST00000156372, ENSMUST00000124035	Rps19	protein_coding	cds	GGG	GGC	chr7	+	511.5	125.833	-32	24888463	24888465	12.0773	15.0815	16.5617	13.4862	32.2229	66.9219	112.631	43.7205	3	3	0
ENSMUSG00000041360	12106	ENSMUST00000076219	Pum3	protein_coding	cds	AAG	AAA	chr19	-	389	115.5	-532	27424296	27424294	10.7232	12.5485	13.7028	10.3063	43.3663	31	84.6726	36.9745	3	3	0
ENSMUSG00000041453	17717	ENSMUST00000035983, ENSMUST00000075453, ENSMUST00000099272	Rpl21	protein_coding	cds	TTT	AGG	chr5	+	463.667	18	-142	146834249	146834251	13.6282	26.5734	19.6039	59.0134	48.1108	10.6612	117.785	59.8056	3	3	0
ENSMUSG00000041841	8041	ENSMUST00000045356	Rpl37	protein_coding	cds	CGT	GAG	chr15	+	271	78	-19	5117681	5117683	27.9366	33.7615	30.312	33.8113	22.5815	15.1083	71.5011	92.0101	3	3	0
ENSMUSG00000042750	24151	ENSMUST00000049130	Bex2	protein_coding	cds	GGA	GAC	chrX	-	396	43.5	-85	136067071	136067069	15.0708	23.2211	22.2748	23.1872	24.5081	14.401	62.0963	60.5668	3	3	0
ENSMUSG00000043091	8948	ENSMUST00000058914	Tuba1c	protein_coding	cds	GAT	GCT	chr15	+	822	96.5	-352.5	99034513	99034515	21.1813	17.0192	13.9376	22.4357	34.3583	27.5072	84.3012	52.1381	3	3	0
ENSMUSG00000044147	5393	ENSMUST00000050063	Arf6	protein_coding	cds	GGC	GGC	chr12	+	736	64	-111	69372985	69372987	37.2258	32.7216	21.9203	53.5301	97.6782	145.294	296.502	91.8677	3	3	0
ENSMUSG00000044408	5282	ENSMUST00000056228	Sptssa	protein_coding	cds	TGG	GAG	chr12	-	183	30.5	-40	54656390	54656388	18.2978	26.1233	23.2738	56.1423	20.2383	22.471	98.8516	67.695	3	3	0
ENSMUSG00000044533	10018	ENSMUST00000152407, ENSMUST00000054289, ENSMUST00000146867, ENSMUST00000170715	Rps2	protein_coding	cds	GAC	CTC	chr17	+	881.75	253	-36	24721672	24721674	31.7686	24.8473	31.7989	31.0625	22.238	16.6759	69.9764	88.4147	3	3	0
ENSMUSG00000045128	21119	ENSMUST00000054220	Rpl18a	protein_coding	cds	CCA	CTG	chr8	-	111	25	-151	70896287	70896285	55.6991	82.4436	68.9235	82.2984	27.0209	14.2724	123.592	207.066	3	3	0
ENSMUSG00000045136	6748	ENSMUST00000075774	Tubb2b	protein_coding	cds	ATG	GAC	chr13	-	1327	401.5	-43.5	34127603	34127601	41.8454	102.784	31.3931	87.7339	193.99	138.829	420.553	176.022	3	3	0
ENSMUSG00000046330	488	ENSMUST00000059980	Rpl37a	protein_coding	cds	GGT	TCC	chr1	+	202	57	-35	72712150	72712152	13.7074	10.258	14.7346	23.8559	21.0837	20.8363	65.776	38.7	3	3	0
ENSMUSG00000046434	9120	ENSMUST00000087351	Hnrnpa1	protein_coding	cds	CCA	CAC	chr15	+	285	75	-245	103241516	103241518	30.9847	49.4129	36.2002	56.9157	68.4923	15.1619	140.57	116.598	3	3	0
ENSMUSG00000046434	9121	ENSMUST00000036004	Hnrnpa1	protein_coding	cds	CCA	CAC	chr15	+	307	75	-298	103241538	103241540	34.0083	53.8095	36.2002	60.7114	71.3847	15.1619	147.258	124.018	3	3	0
ENSMUSG00000046434	9134	ENSMUST00000087351	Hnrnpa1	protein_coding	cds	CAC	CTA	chr15	+	417	119	-201	103241958	103241960	14.191	15.0648	18.7879	15.2231	25.254	21.0561	61.5332	48.0437	3	3	0
ENSMUSG00000046434	9138	ENSMUST00000036004	Hnrnpa1	protein_coding	cds	CAC	CTA	chr15	+	439	119	-254	103241980	103241982	14.3627	15.0648	18.7879	15.2231	25.254	21.0561	61.5332	48.2154	3	3	0
ENSMUSG00000046434	9141	ENSMUST00000087351	Hnrnpa1	protein_coding	cds	GGC	AGT	chr15	+	480	140	-180	103242021	103242023	25.9866	36.2149	22.2196	53.734	51.7016	56.2264	161.662	84.421	3	3	0
ENSMUSG00000046434	9143	ENSMUST00000036004	Hnrnpa1	protein_coding	cds	GGC	AGT	chr15	+	502	140	-233	103242043	103242045	28.6383	38.4694	24.5452	57.2402	51.7016	56.2264	165.168	91.653	3	3	0
ENSMUSG00000046434	9144	ENSMUST00000087351	Hnrnpa1	protein_coding	cds	CAT	GAC	chr15	+	525	155	-165	103242066	103242068	54.9757	67.6388	60.4958	116.779	113.108	52.8028	282.689	183.11	3	3	0
ENSMUSG00000046434	9145	ENSMUST00000036004	Hnrnpa1	protein_coding	cds	CAT	GAC	chr15	+	547	155	-218	103242088	103242090	58.2806	74.1753	64.1274	117.048	115.288	56.4412	288.777	196.583	3	3	0
ENSMUSG00000046434	9163	ENSMUST00000087351	Hnrnpa1	protein_coding	cds	GGC	AAT	chr15	+	849	263	-57	103243640	103243642	17.7701	10.9114	10.265	22.6683	35.5077	13.7162	71.8922	38.9465	3	3	0
ENSMUSG00000046434	9167	ENSMUST00000036004	Hnrnpa1	protein_coding	cds	GGC	AAT	chr15	+	1030	316	-57	103243662	103243664	17.7701	10.9114	10.265	22.6683	39.0138	15.0235	76.7056	38.9465	3	3	0
ENSMUSG00000046711	10094	ENSMUST00000117600	Hmga1	protein_coding	cds	AGT	GAA	chr17	+	239	47.5	-58	27559679	27559681	14.2373	24.8074	15.0111	23.5514	16.9333	21.4622	61.9469	54.0558	3	3	0
ENSMUSG00000046711	10098	ENSMUST00000119486	Hmga1	protein_coding	cds	AGT	GAA	chr17	+	316	48	-59	27560963	27560965	19.774	29.5769	15.2446	23.2117	15.8115	20.6576	59.6808	64.5955	3	3	0
ENSMUSG00000047126	3975	ENSMUST00000103186, ENSMUST00000060766	Cltc	protein_coding	cds	CAT	TCT	chr11	-	682	145.333	-1531.33	86733663	86733661	10.3504	20.9635	16.663	41.1402	27.6997	18.0945	86.9344	47.9769	3	3	0
ENSMUSG00000047246	6450	ENSMUST00000091704, ENSMUST00000051091	H2bc6	protein_coding	cds	ACC	AAG	chr13	-	563	119	-7	23585600	23585598	15.1921	16.7344	12.3733	24.4571	28.0275	23.5192	76.0038	44.2998	3	3	0
ENSMUSG00000047246	6451	ENSMUST00000091704, ENSMUST00000051091	H2bc6	protein_coding	cds	AAG	GCT	chr13	-	554	116	-10	23585609	23585607	17.6393	10.409	12.3204	10.477	18.1642	28.8209	57.462	40.3686	3	3	0
ENSMUSG00000047246	6458	ENSMUST00000091704, ENSMUST00000051091	H2bc6	protein_coding	cds	ATC	GCG	chr13	-	425	73	-53	23585738	23585736	38.9055	64.1618	42.7239	67.6189	59.73	66.3277	193.676	145.791	3	3	0
ENSMUSG00000047459	13598	ENSMUST00000109682, ENSMUST00000150602	Dynlrb1	protein_coding	cds	GAT	AAA	chr2	+	449	86	-14	155247937	155249921	19.4176	16.3354	21.7232	37.2282	25.607	39.8692	102.704	57.4761	3	3	0
ENSMUSG00000047675	15744	ENSMUST00000102696	Rps8	protein_coding	cds	GCC	CTG	chr4	-	350	56	-152	117155051	117155049	12.7292	18.0511	18.019	28.17	28.3469	12.6742	69.1911	48.7993	3	3	0
ENSMUSG00000047675	15749	ENSMUST00000102696	Rps8	protein_coding	cds	CCT	CGC	chr4	-	299	39	-169	117155102	117155100	11.8158	11.1738	25.2092	20.1758	19.1835	23.6156	62.9749	48.1989	3	3	0
ENSMUSG00000047844	24157	ENSMUST00000116527	Bex4	protein_coding	cds	AGA	AAG	chrX	+	520	89	-29	136140126	136140128	18.1186	34.2611	15.7413	25.5653	76.8675	36.2015	138.634	68.121	3	3	0
ENSMUSG00000047945	16006	ENSMUST00000062356	Marcksl1	protein_coding	cds	AAA	TTG	chr4	+	543	98	-102	129514923	129514925	13.6718	18.5445	19.4646	17.0834	22.0833	13.771	52.9377	51.6808	3	3	0
ENSMUSG00000048076	3323	ENSMUST00000061242, ENSMUST00000163300	Arf1	protein_coding	cds	GGC	GGC	chr11	-	432.5	68	-113	59213198	59213196	16.0196	11.7493	10.1067	21.5417	45.9874	73.3838	140.913	37.8757	3	3	0
ENSMUSG00000049539	6709	ENSMUST00000055770	H1f1	protein_coding	cds	GCT	GCT	chr13	+	105	17.5	-195	23763821	23763823	14.2078	28.9581	14.6826	33.1464	51.0654	35.7656	119.977	57.8486	3	3	0
ENSMUSG00000050017	17059	ENSMUST00000086635	Pitpnb	protein_coding	cds	ATT	GAC	chr5	+	756	235	-36	111383047	111383049	14.9755	21.2459	12.5078	38.8723	47.8621	48.2832	135.018	48.7292	3	3	0
ENSMUSG00000050799	6723	ENSMUST00000052776	H2bc1	protein_coding	cds	ACC	AAG	chr13	-	360	120	-7	23933797	23933795	13.7318	26.0588	12.0623	26.1176	86.6268	114.44	227.185	51.8529	3	3	0
ENSMUSG00000050953	1425	ENSMUST00000068581	Gja1	protein_coding	cds	GAC	GAC	chr10	+	1216	337.5	-44	56388530	56388532	23.1523	31.1996	33.0594	43.8807	48.3828	56.6275	148.891	87.4114	3	3	0
ENSMUSG00000051159	24030	ENSMUST00000050551, ENSMUST00000101336	Cited1	protein_coding	cds	GGG	GAG	chrX	-	688	123	-80	102247700	102247698	14.4484	15.4273	12.6921	18.8225	15.5829	17.72	52.1254	42.5678	3	3	0
ENSMUSG00000051223	308	ENSMUST00000050552, ENSMUST00000188630, ENSMUST00000186949, ENSMUST00000188898	Bzw1	protein_coding, nonsense_mediated_decay	cds	TTT	AAA	chr1	+	204.4	21.2	-274.6	58394256	58394258	11.9604	12.8854	11.3911	13.2786	75.1471	51.516	139.942	36.2368	3	3	0
ENSMUSG00000051627	6487	ENSMUST00000062045	H1f4	protein_coding	cds	GGC	GTG	chr13	-	226	54.5	-164	23622277	23622275	15.2678	15.1549	15.7487	21.5976	23.3263	24.1792	69.1031	46.1714	3	3	0
ENSMUSG00000051855	17980	ENSMUST00000115127, ENSMUST00000151777, ENSMUST00000147400, ENSMUST00000157040, ENSMUST00000163949, ENSMUST00000124665	Mest	protein_coding	cds	CAT	CGA	chr6	+	497.667	100.833	-131	30742554	30742556	23.0643	36.4012	33.0278	40.8362	22.7932	28.9128	92.5421	92.4933	3	3	0
ENSMUSG00000051855	17983	ENSMUST00000157040, ENSMUST00000163949, ENSMUST00000124665, ENSMUST00000147400	Mest	protein_coding	cds	GGA	GAT	chr6	+	673.5	145.9	-169.1	30742820	30742822	30.4157	29.842	34.3711	60.5959	36.7794	17.1982	114.574	94.6288	3	3	0
ENSMUSG00000052217	20150	ENSMUST00000063957	Hbb-bh1	protein_coding	cds	GAT	CCT	chr7	-	351	99	-48	103842709	103842707	18.8079	46.3488	25.7332	26.8035	56.3501	38.4286	121.582	90.8898	3	3	0
ENSMUSG00000052217	20158	ENSMUST00000063957	Hbb-bh1	protein_coding	cds	GCC	ATC	chr7	-	213	53	-94	103842847	103842845	19.7783	15.1348	15.4014	13.4182	11.9074	15.0096	40.3352	50.3146	3	3	0
ENSMUSG00000054309	5160	ENSMUST00000067284	Cpsf3	protein_coding	cds	AAT	GGC	chr12	+	1184	349	-335	21301465	21301467	12.6349	40.6909	14	39.6658	38.0565	16.0222	93.7445	67.3258	3	3	0
ENSMUSG00000054408	21006	ENSMUST00000067476	Spcs3	protein_coding	cds	AAT	GGC	chr8	-	492	133	-47	54524952	54524950	15.1667	18.7973	12.9768	33.2812	10.7247	20.0136	64.0195	46.9407	3	3	0
ENSMUSG00000054428	16072	ENSMUST00000152993, ENSMUST00000067496	Atpif1	protein_coding	cds	CAT	AAG	chr4	-	334.5	78	-12	132530721	132530719	46.6844	72.5092	44.6217	31.224	27.4599	40.9496	99.6336	163.815	3	3	0
ENSMUSG00000054717	21028	ENSMUST00000067925	Hmgb2	protein_coding	cds	CGT	GCC	chr8	+	609	162	-48	57513415	57513417	57.6114	62.5286	51.0405	80.4004	95.2005	81.732	257.333	171.18	3	3	0
ENSMUSG00000054766	12669	ENSMUST00000134364, ENSMUST00000102866, ENSMUST00000067996	Set	protein_coding	cds	CCA	GAG	chr2	+	854.667	192.5	-67.3333	30070247	30070249	34.4425	35.2645	14.4024	43.9757	15.2505	13.31	72.5362	84.1094	3	3	0
ENSMUSG00000054766	12675	ENSMUST00000102866, ENSMUST00000067996	Set	protein_coding	cds	CCC	TTG	chr2	+	1005	221	-62	30070337	30070339	20.7786	31.7901	32.7626	38.2553	24.4819	33.8601	96.5973	85.3314	3	3	0
ENSMUSG00000055065	8486	ENSMUST00000054014	Ddx17	protein_coding	cds	GCT	GCC	chr15	-	2192	565	-87	79530276	79530274	12.3633	15.9168	18.7674	20.7242	26.3983	16.7837	63.9061	47.0475	3	3	0
ENSMUSG00000055553	21084	ENSMUST00000121623, ENSMUST00000138260	Kxd1	protein_coding	cds	TCC	CTT	chr8	-	747.333	183.667	-35	70508479	70508477	13.1331	19.3048	13.7817	39.5653	28.7945	15.9104	84.2702	46.2196	3	3	0
ENSMUSG00000057278	18349	ENSMUST00000089558	Snrpg	protein_coding	cds	CCC	GAG	chr6	+	297	6	-70	86378849	86378851	30.636	66.4806	17.4701	86.0669	129.473	157.038	372.578	114.587	3	3	0
ENSMUSG00000057322	4562	ENSMUST00000106602, ENSMUST00000077915, ENSMUST00000106599, ENSMUST00000082092	Rpl38	protein_coding	cds	ATC	AAG	chr11	+	202.25	24	-46	114671741	114671743	22.6727	75.3388	53.4059	81.0417	164.405	148.945	394.391	151.417	3	3	0
ENSMUSG00000057322	4564	ENSMUST00000106602, ENSMUST00000077915, ENSMUST00000106599, ENSMUST00000082092	Rpl38	protein_coding	cds	GAA	AAG	chr11	+	280.25	50	-20	114671819	114671821	24.712	68.2021	32.1801	74.8704	48.1255	10.7311	133.727	125.094	3	3	0
ENSMUSG00000057666	18785	ENSMUST00000117757, ENSMUST00000118875, ENSMUST00000183272, ENSMUST00000073605	Gapdh	protein_coding	cds	TAC	GGC	chr6	-	1029.5	310.75	-15.25	125162089	125162087	30.2087	25.7914	16.6862	35.9988	63.8869	78.2331	178.119	72.6862	3	3	0
ENSMUSG00000057666	18787	ENSMUST00000117757, ENSMUST00000118875, ENSMUST00000183272, ENSMUST00000073605	Gapdh	protein_coding	cds	GGG	GCT	chr6	-	969.5	290.75	-35.25	125162259	125162257	43.3726	57.4474	26.8751	113.168	62.8599	11.277	187.305	127.695	3	3	0
ENSMUSG00000057666	18819	ENSMUST00000117757, ENSMUST00000118875, ENSMUST00000073605, ENSMUST00000183272	Gapdh	protein_coding	cds	GGT	GTG	chr6	-	477.5	126.75	-199.25	125162969	125162967	17.4059	10.7217	10.5387	11.0173	35.5927	10.8991	57.5091	38.6663	3	3	0
ENSMUSG00000057666	18850	ENSMUST00000182052	Gapdh	protein_coding	5utr	NA	NA	chr6	-	280	-27	-191	125163366	125163364	16.0212	17.0629	19.4202	40.7475	39.7803	14.838	95.3658	52.5043	3	3	0
ENSMUSG00000057666	18851	ENSMUST00000117757, ENSMUST00000118875, ENSMUST00000182277, ENSMUST00000073605	Gapdh	protein_coding	cds	AAC	GAC	chr6	-	276.5	37	-233.25	125163367	125163365	12.276	14.3924	14.2709	29.3035	34.7812	17.4872	81.5719	40.9393	3	3	0
ENSMUSG00000057762	7076	ENSMUST00000071118	Gm6169	protein_coding	cds	ACT	GAC	chr13	-	249	83	-69	97099048	97099046	12.1221	20.2978	12.7077	44.4833	34.8402	16.4638	95.7873	45.1276	3	3	0
ENSMUSG00000057841	18531	ENSMUST00000081840	Rpl32	protein_coding	cds	TCT	TAC	chr6	-	334	93	-42	115805688	115805686	12.3088	10.1696	19.4756	28.1568	27.8272	12.9748	68.9588	41.954	3	3	0
ENSMUSG00000058355	21193	ENSMUST00000080536	Abce1	protein_coding	cds	CCT	GAT	chr8	-	636	137	-462	79701247	79701245	41.4039	35.5335	25.8774	56.2895	65.1637	28.3333	149.787	102.815	3	3	0
ENSMUSG00000058385	6361	ENSMUST00000079251	H2bc8	protein_coding	cds	ATC	GCG	chr13	+	256	73	-53	23571663	23571665	38.9055	64.1618	42.7239	67.6189	59.73	66.3277	193.676	145.791	3	3	0
ENSMUSG00000058558	17022	ENSMUST00000153590, ENSMUST00000082223	Rpl5	protein_coding	cds	TAT	GAA	chr5	+	522.5	93	-136.5	107903695	107903697	10.3146	13.9316	10.4542	23.4569	59.6309	21.0953	104.183	34.7004	3	3	0
ENSMUSG00000058558	17024	ENSMUST00000153590, ENSMUST00000082223	Rpl5	protein_coding	cds	GGT	GCC	chr5	+	585.5	114	-115.5	107903758	107903760	15.3928	23.9127	18.9773	51.8695	16.7706	10.58	79.2201	58.2828	3	3	0
ENSMUSG00000058600	8170	ENSMUST00000142643, ENSMUST00000079735, ENSMUST00000009039	Rpl30	protein_coding	cds	GGT	GAT	chr15	-	554.333	92	-16	34440604	34441232	62.941	82.1728	65.9499	119.068	99.2448	102.379	320.692	211.064	3	3	0
ENSMUSG00000058672	6740	ENSMUST00000056427	Tubb2a	protein_coding	cds	ATG	GAC	chr13	-	1284	401.5	-43.5	34074601	34074599	41.8454	102.784	35.2172	87.7339	193.99	147.015	428.738	179.846	3	3	0
ENSMUSG00000058773	5966	ENSMUST00000080511	H1f5	protein_coding	cds	GGC	GGC	chr13	-	233	54	-169	21780393	21780391	37.1411	39.5668	21.3324	63.068	62.856	50.8998	176.824	98.0403	3	3	0
ENSMUSG00000058799	2164	ENSMUST00000065917	Nap1l1	protein_coding	cds	TAT	GAA	chr10	+	521	124	-267	111490162	111490164	37.2382	35.101	33.6749	45.0558	66.3411	60.7461	172.143	106.014	3	3	0
ENSMUSG00000058799	2165	ENSMUST00000065917	Nap1l1	protein_coding	cds	ACA	GAA	chr10	+	530	126.5	-264.5	111490378	111490380	14.6904	12.2698	10.3548	22.0668	37.1012	34.0657	93.2336	37.315	3	3	0
ENSMUSG00000058799	2169	ENSMUST00000065917	Nap1l1	protein_coding	cds	TTT	TCG	chr10	+	755	202	-189	111492103	111492105	10.0698	10.4119	10.6643	20.9112	22.3934	21.6658	64.9705	31.146	3	3	0
ENSMUSG00000058799	2179	ENSMUST00000065917	Nap1l1	protein_coding	cds	CCT	GAA	chr10	+	1058	303	-88	111493404	111493406	25.0156	26.7145	24.0372	60.4962	92.9185	49.0261	202.441	75.7672	3	3	0
ENSMUSG00000059005	12959	ENSMUST00000111964, ENSMUST00000111962, ENSMUST00000111961, ENSMUST00000164947, ENSMUST00000090792	Hnrnpa3	protein_coding	cds	AAC	CTG	chr2	+	422.8	130.7	-227.3	75661973	75661975	13.347	20.5966	21.5631	25.7929	32.9791	26.2628	85.0347	55.5067	3	3	0
ENSMUSG00000059005	12963	ENSMUST00000111964, ENSMUST00000111962, ENSMUST00000111961, ENSMUST00000164947, ENSMUST00000090792	Hnrnpa3	protein_coding	cds	CAT	GAC	chr2	+	530.8	167.2	-190.8	75662081	75662083	23.417	27.7101	36.696	65.3051	13.0922	16.5728	94.97	87.8232	3	3	0
ENSMUSG00000059005	12975	ENSMUST00000111964, ENSMUST00000111962, ENSMUST00000111961, ENSMUST00000141974, ENSMUST00000164947, ENSMUST00000090792	Hnrnpa3	protein_coding	cds	AAT	GAA	chr2	+	818.333	264.667	-66	75663689	75663691	51.4579	61.4279	50.7017	98.2218	31.6736	43.6959	173.591	163.587	3	3	0
ENSMUSG00000059040	11290	ENSMUST00000076155	Eno1b	protein_coding	cds	CGT	GGG	chr18	+	177	14	-420	48046798	48046800	21.2523	23.799	22.7451	61.3786	32.898	18.7898	113.066	67.7965	3	3	0
ENSMUSG00000059040	11298	ENSMUST00000076155	Eno1b	protein_coding	cds	GCT	CTG	chr18	+	360	75	-359	48046981	48046983	16.0942	20.1673	10.2476	48.1458	54.4331	16.8888	119.468	46.509	3	3	0
ENSMUSG00000059040	11325	ENSMUST00000076155	Eno1b	protein_coding	cds	GAT	GAC	chr18	+	927	263.5	-170.5	48047548	48047550	32.7106	40.6061	28.4111	88.6334	179.74	167.392	435.765	101.728	3	3	0
ENSMUSG00000059040	11329	ENSMUST00000076155	Eno1b	protein_coding	cds	TTT	GAC	chr18	+	1020	295	-139	48047641	48047643	10.4079	13.8362	12.6185	41.9073	46.1476	11.3832	99.4381	36.8626	3	3	0
ENSMUSG00000059040	11338	ENSMUST00000076155	Eno1b	protein_coding	cds	GAG	GAC	chr18	+	1263	376	-58	48047884	48047886	24.6328	29.7702	29.7675	36.5083	61.1136	35.0993	132.721	84.1705	3	3	0
ENSMUSG00000059343	15489	ENSMUST00000179234, ENSMUST00000078617	Aldoart1	protein_coding	cds	CAT	GCC	chr4	-	1312	388	-3.5	72851322	72851320	16.9295	28.2019	19.9756	26.4021	23.4863	12.3693	62.2576	65.107	3	3	0
ENSMUSG00000059796	3486	ENSMUST00000102589	Eif4a1	nonsense_mediated_decay	3utr	NA	NA	chr11	-	579	532	380	69669135	69669133	37.5704	43.5699	39.8366	100.835	38.0191	11.6774	150.531	120.977	3	3	0
ENSMUSG00000059796	3512	ENSMUST00000102589	Eif4a1	nonsense_mediated_decay	3utr	NA	NA	chr11	-	381	334	182	69670219	69670217	12.3591	12.8508	10.7822	26.9888	48.263	61.98	137.232	35.992	3	3	0
ENSMUSG00000059796	3526	ENSMUST00000102589	Eif4a1	nonsense_mediated_decay	3utr	NA	NA	chr11	-	222	175	23	69670720	69670718	20.7808	21.9208	18.3459	32.7458	42.697	39.3872	114.83	61.0474	3	3	0
ENSMUSG00000059796	3527	ENSMUST00000163666	Eif4a1	protein_coding	cds	TTT	GAT	chr11	-	115	33	-373	69670721	69670719	15.8048	15.0823	16.2714	28.3544	29.9221	31.2142	89.4906	47.1586	3	3	0
ENSMUSG00000060036	8553	ENSMUST00000187832, ENSMUST00000185306	Rpl3	nonsense_mediated_decay, protein_coding	cds	CAC	CTC	chr15	-	284	51	-132.5	80082463	80082461	13.9542	14.8512	13.1779	29.6996	52.1814	95.4073	177.288	41.9833	3	3	0
ENSMUSG00000060073	5420	ENSMUST00000162626, ENSMUST00000071704, ENSMUST00000162898	Psma3	nonsense_mediated_decay, protein_coding	3utr, cds	NA, CAG	NA, GTG	chr12	+	278.25	240.5	156	70986921	70986923	13.0952	18.0744	11.7933	33.9336	64.5828	60.4686	158.985	42.9629	3	3	0
ENSMUSG00000060093	6662	ENSMUST00000102964	H4c1	protein_coding	cds	TAC	GCG	chr13	-	337	87.5	-15.5	23760894	23760892	22.6526	16.8856	35.3855	36.0803	20.3219	35.8226	92.2248	74.9238	3	3	0
ENSMUSG00000060093	6668	ENSMUST00000102964	H4c1	protein_coding	cds	ACC	CGC	chr13	-	235	54	-49	23760996	23760994	13.759	23.6453	11.9231	27.7665	96.8507	163.902	288.519	49.3275	3	3	0
ENSMUSG00000060126	7908	ENSMUST00000110894, ENSMUST00000142061	Tpt1	protein_coding	cds	GGT	GAA	chr14	+	602.5	119	-36	75847252	75847254	38.7458	25.4423	13.4046	17.914	12.1372	13.6259	43.6771	77.5927	3	3	0
ENSMUSG00000060636	9480	ENSMUST00000078804, ENSMUST00000115079, ENSMUST00000115078, ENSMUST00000115076, ENSMUST00000115075	Rpl35a	protein_coding	cds	GGA	GGT	chr16	+	303.4	60	-50	33058694	33058696	26.7134	22.0621	20.0424	34.0906	49.1401	81.8034	165.034	68.8179	3	3	0
ENSMUSG00000060639	6153	ENSMUST00000102977	H4c9	protein_coding	cds	TAC	GCG	chr13	-	303	87.5	-15.5	22041060	22041058	26.4298	26.3832	37.9493	36.9939	20.9835	47.4218	105.399	90.7623	3	3	0
ENSMUSG00000060639	6160	ENSMUST00000102977	H4c9	protein_coding	cds	ACC	CGC	chr13	-	201	54	-49	22041162	22041160	19.0548	32.5611	12.2795	33.6424	109.146	189.812	332.6	63.8955	3	3	0
ENSMUSG00000060678	6528	ENSMUST00000102967	H4c3	protein_coding	cds	TAC	GCG	chr13	-	269	87.5	-15.5	23698186	23698184	25.1715	24.3195	39.0839	34.4999	18.662	43.6692	96.8311	88.5748	3	3	0
ENSMUSG00000060678	6535	ENSMUST00000102967	H4c3	protein_coding	cds	ACC	CGC	chr13	-	167	54	-49	23698288	23698286	16.3255	30.7871	11.4513	34.8129	106.421	176.969	318.202	58.564	3	3	0
ENSMUSG00000060743	1250	ENSMUST00000161308, ENSMUST00000081026, ENSMUST00000162814, ENSMUST00000159789	H3f3a	protein_coding	cds	GTG	CGA	chr1	-	380.25	71	-60.25	180810186	180810184	19.3626	18.6902	16.1159	13.7212	11.5328	18.8602	44.1142	54.1687	3	3	0
ENSMUSG00000060860	19101	ENSMUST00000079496	Ube2s	protein_coding	cds	CCT	GAT	chr7	-	506	27	-196	4810444	4810442	55.7297	124.728	50.4604	200.363	193.799	68.1927	462.355	230.918	3	3	0
ENSMUSG00000060981	6215	ENSMUST00000102972	H4c8	protein_coding	cds	ACC	CGC	chr13	+	227	54	-49	23531276	23531278	14.5488	25.4779	10.2795	28.9937	100.232	176.233	305.459	50.3061	3	3	0
ENSMUSG00000060981	6222	ENSMUST00000102972	H4c8	protein_coding	cds	TAC	GCG	chr13	+	329	87.5	-15.5	23531378	23531380	22.4457	18.4972	37.7812	34.5968	20.6474	47.272	102.516	78.7241	3	3	0
ENSMUSG00000061315	2348	ENSMUST00000092048	Naca	protein_coding	cds	TTT	GGG	chr10	+	6333	2094	-93	128046174	128046176	21.909	14.9265	24.396	23.8198	49.2347	29.5852	102.64	61.2315	3	3	0
ENSMUSG00000061315	2349	ENSMUST00000092048	Naca	protein_coding	cds	GGG	GAA	chr10	+	6336	2095	-92	128046177	128046179	16.1803	19.1629	14.1023	32.9652	60.3777	66.0303	159.373	49.4456	3	3	0
ENSMUSG00000061315	2352	ENSMUST00000073868	Naca	protein_coding	cds	TTT	GGG	chr10	+	477	122	-93	128046234	128046236	20.3741	14.191	21.1484	23.8198	40.7289	27.348	91.8967	55.7135	3	3	0
ENSMUSG00000061315	2353	ENSMUST00000073868	Naca	protein_coding	cds	GGG	GAA	chr10	+	480	123	-92	128046237	128046239	16.1803	19.1629	14.1023	32.9652	60.3777	66.0303	159.373	49.4456	3	3	0
ENSMUSG00000061482	6438	ENSMUST00000102968	H4c4	protein_coding	cds	CAC	GCC	chr13	+	229	74.5	-28.5	23581826	23581828	12.1547	11.2733	15.8954	20.4413	46.4209	48.3871	115.249	39.3233	3	3	0
ENSMUSG00000061482	6440	ENSMUST00000102968	H4c4	protein_coding	cds	CGC	AAG	chr13	+	238	78	-25	23581835	23581837	25.3476	59.2897	19.619	27.529	13.5102	19.5283	60.5675	104.256	3	3	0
ENSMUSG00000061615	6609	ENSMUST00000078369	H2ac4	protein_coding	cds	TCG	GAG	chr13	+	127	39.5	-90	23751252	23751254	28.4808	24.086	31.4297	47.716	22.731	11.0215	81.4685	83.9965	3	3	0
ENSMUSG00000061787	19978	ENSMUST00000080813	Rps17	protein_coding	cds	CCC	GAC	chr7	-	347	99	-36	81343765	81343763	12.4432	18.5507	17.992	38.7477	15.7861	12.0032	66.537	48.986	3	3	0
ENSMUSG00000061808	11095	ENSMUST00000075312	Ttr	protein_coding	cds	CAT	GAA	chr18	+	480	107	-40	20670069	20670071	29.6485	56.2026	24.3112	74.7036	82.4212	38.8168	195.942	110.162	3	3	0
ENSMUSG00000061983	1347	ENSMUST00000073926	Rps12	protein_coding	cds	CAA	GAG	chr10	-	124	18	-119	23786848	23786846	11.9052	16.4665	18.9515	33.3885	45.5856	55.0064	133.98	47.3232	3	3	0
ENSMUSG00000062006	15010	ENSMUST00000062601, ENSMUST00000079085	Rpl34	protein_coding	cds	GTC	TTG	chr3	-	473	104.5	-12.5	130726914	130726912	16.8725	19.2513	20.2894	32.0078	50.3823	18.8177	101.208	56.4133	3	3	0
ENSMUSG00000062006	15016	ENSMUST00000062601, ENSMUST00000079085, ENSMUST00000133802	Rpl34	protein_coding	cds	CTT	CGA	chr3	-	270	52	-56	130729060	130729058	31.8621	63.1611	31.9575	97.8377	31.3027	35.2653	164.406	126.981	3	3	0
ENSMUSG00000062006	15018	ENSMUST00000062601, ENSMUST00000079085, ENSMUST00000133802	Rpl34	protein_coding	cds	GGG	AAA	chr3	-	228	38	-70	130729102	130729100	19.7954	22.9567	12.2852	34.6028	31.5742	27.8581	94.035	55.0373	3	3	0
ENSMUSG00000062006	15019	ENSMUST00000062601, ENSMUST00000079085, ENSMUST00000133802	Rpl34	protein_coding	cds	GGC	AAC	chr3	-	192	26	-82	130729138	130729136	34.9207	49.1705	26.4061	105.509	114.186	58.6478	278.343	110.497	3	3	0
ENSMUSG00000062825	4723	ENSMUST00000071555, ENSMUST00000062147, ENSMUST00000106215	Actg1	protein_coding	cds	ATG	TGG	chr11	-	900.333	280	-21	120346456	120346454	26.2854	49.5594	35.3346	56.058	89.2031	99.772	245.033	111.179	3	3	0
ENSMUSG00000062825	4731	ENSMUST00000131103	Actg1	nonsense_mediated_decay	3utr	NA	NA	chr11	-	1113	1041	643	120346521	120346519	23.1292	20.3526	12.7108	43.9388	39.4561	26.8657	110.261	56.1925	3	3	0
ENSMUSG00000062825	4732	ENSMUST00000071555, ENSMUST00000062147, ENSMUST00000106215	Actg1	protein_coding	cds	CCT	GAG	chr11	-	834.333	258	-43	120346522	120346520	27.1229	21.5918	12.3967	44.1368	32.6764	25.7136	102.527	61.1114	3	3	0
ENSMUSG00000062825	4737	ENSMUST00000071555, ENSMUST00000062147, ENSMUST00000089616, ENSMUST00000106215	Actg1	protein_coding	cds	CCT	AGC	chr11	-	658	204.25	-47.75	120346658	120346656	20.0163	31.5568	12.4521	21.4641	59.1831	69.0711	149.718	64.0252	3	3	0
ENSMUSG00000062825	4747	ENSMUST00000131103	Actg1	nonsense_mediated_decay	3utr	NA	NA	chr11	-	1039	967	569	120346698	120346696	10.6181	16.8889	10.6373	25.9038	51.4693	14.5848	91.9579	38.1443	3	3	0
ENSMUSG00000062825	4751	ENSMUST00000131103	Actg1	nonsense_mediated_decay	3utr	NA	NA	chr11	-	1017	945	547	120346720	120346718	43.3771	43.2004	44.6386	70.8721	66.6843	47.1537	184.71	131.216	3	3	0
ENSMUSG00000062825	4752	ENSMUST00000071555, ENSMUST00000062147, ENSMUST00000089616, ENSMUST00000106215	Actg1	protein_coding	cds	GGT	GGT	chr11	-	595	183.25	-68.75	120346721	120346719	31.5611	33.1367	34.4394	54.9349	47.3815	31.8194	134.136	99.1372	3	3	0
ENSMUSG00000062825	4790	ENSMUST00000131103	Actg1	nonsense_mediated_decay	3utr	NA	NA	chr11	-	675	603	205	120347154	120347152	49.0964	41.0989	49.8215	55.2045	11.3557	20.6274	87.1876	140.017	3	3	0
ENSMUSG00000062867	23074	ENSMUST00000081111, ENSMUST00000194904	Impdh2	protein_coding	cds	GGC	GAG	chr9	+	1042	306	-110.5	108564906	108564908	21.4058	16.617	17.0927	43.3214	22.9934	17.3205	83.6354	55.1155	3	3	0
ENSMUSG00000062997	12826	ENSMUST00000080861	Rpl35	protein_coding	cds	CTG	AAG	chr2	-	841	101	-22	39001685	39001683	16.1529	50.2171	19.2527	35.8155	23.2346	15.5094	74.5596	85.6227	3	3	0
ENSMUSG00000062997	12838	ENSMUST00000080861	Rpl35	protein_coding	cds	ATA	CGA	chr2	-	676	46	-77	39004734	39004732	22.7259	35.7613	41.8124	41.0164	26.7831	13.5712	81.3707	100.3	3	3	0
ENSMUSG00000063129	5340	ENSMUST00000080123	Aldoart2	protein_coding	cds	GGC	AAG	chr12	+	131	25.5	-338.5	55565369	55565371	19.5994	23.5993	18.0827	65.9604	34.94	18.3569	119.257	61.2814	3	3	0
ENSMUSG00000063129	5349	ENSMUST00000080123	Aldoart2	protein_coding	cds	AGC	GAC	chr12	+	704	217	-147	55565942	55565944	22.8063	27.1294	43.1861	39.9038	76.1115	102.44	218.455	93.1217	3	3	0
ENSMUSG00000063129	5351	ENSMUST00000080123	Aldoart2	protein_coding	cds	CGC	ACA	chr12	+	827	257.5	-106.5	55566065	55566067	52.5929	57.6796	47.2026	79.6336	90.3956	55.9333	225.963	157.475	3	3	0
ENSMUSG00000063229	19905	ENSMUST00000147535, ENSMUST00000048209, ENSMUST00000005051, ENSMUST00000092621, ENSMUST00000132157	Ldha	protein_coding	cds	CGT	TAC	chr7	+	695.2	170	-92.4	46850976	46850978	10.6924	16.9182	12.1848	26.0656	24.0784	19.3029	69.4469	39.7954	3	3	0
ENSMUSG00000063229	19913	ENSMUST00000147535, ENSMUST00000048209, ENSMUST00000092621, ENSMUST00000005051	Ldha	protein_coding	cds	AAG	GAG	chr7	+	883.75	226.5	-57.25	46851965	46851967	15.3869	20.48	19.0133	32.1098	96.4314	78.3626	206.904	54.8802	3	3	0
ENSMUSG00000063229	19914	ENSMUST00000048209, ENSMUST00000005051	Ldha	protein_coding	cds	AAG	CTG	chr7	+	918.5	242	-90	46853998	46854000	13.3241	33.8664	20.5356	17.4271	72.532	66.3312	156.29	67.7262	3	3	0
ENSMUSG00000063316	4367	ENSMUST00000077856, ENSMUST00000107249	Rpl27	protein_coding	cds	CCC	CGG	chr11	+	367	49	-87	101443566	101443568	14.1388	11.0063	15.6966	21.0019	28.7809	11.3918	61.1746	40.8417	3	3	0
ENSMUSG00000063316	4369	ENSMUST00000077856, ENSMUST00000107249	Rpl27	protein_coding	cds	ATC	AAG	chr11	+	421	67	-69	101443620	101443622	67.6504	118.035	83.7609	110.546	74.5757	22.4469	207.568	269.446	3	3	0
ENSMUSG00000063316	4374	ENSMUST00000077856, ENSMUST00000107249, ENSMUST00000127514	Rpl27	protein_coding	cds	CCC	TTG	chr11	+	364.667	72.6667	-47	101445235	101445237	17.4583	23.2828	21.7264	26.7334	29.1124	22.3278	78.1736	62.4675	3	3	0
ENSMUSG00000063316	4376	ENSMUST00000077856, ENSMUST00000107249, ENSMUST00000127514	Rpl27	protein_coding	cds	AGG	GAC	chr11	+	400.667	84.1667	-35.5	101445271	101445273	13.8188	21.1152	12.2283	30.8	76.1568	61.5371	168.494	47.1623	3	3	0
ENSMUSG00000063511	19843	ENSMUST00000074575	Snrnp70	protein_coding	cds	CAC	AAT	chr7	-	517	90.5	-357	45387396	45387394	44.6916	50.8242	57.5618	116.669	62.2259	12.4625	191.357	153.078	3	3	0
ENSMUSG00000063524	16317	ENSMUST00000150175, ENSMUST00000080926, ENSMUST00000133839, ENSMUST00000141931	Eno1	protein_coding	cds	CGT	GGG	chr4	+	244.75	14	-195.75	150239523	150239525	21.5531	23.8939	20.804	62.948	34.7717	19.6707	117.39	66.251	3	3	0
ENSMUSG00000063524	16326	ENSMUST00000150175, ENSMUST00000080926	Eno1	protein_coding	cds	GCT	CTG	chr4	+	504	75	-201.5	150242165	150242167	16.0942	20.1673	10.2476	48.1458	54.4331	16.8888	119.468	46.509	3	3	0
ENSMUSG00000063524	16356	ENSMUST00000080926, ENSMUST00000080149	Eno1	protein_coding	cds	GAT	GAC	chr4	+	1130.5	229.5	-170.5	150246694	150246696	32.7106	37.1549	26.8748	75.8982	152.906	125.032	353.836	96.7404	3	3	0
ENSMUSG00000063524	16360	ENSMUST00000080926, ENSMUST00000080149	Eno1	protein_coding	cds	TTT	GAC	chr4	+	1223.5	261	-139	150247470	150247472	10.4079	13.8362	12.6185	41.9073	46.1476	11.3832	99.4381	36.8626	3	3	0
ENSMUSG00000063524	16371	ENSMUST00000080926, ENSMUST00000080149	Eno1	protein_coding	cds	GAG	GAC	chr4	+	1466.5	342	-58	150247891	150247893	23.8126	28.863	29.3052	35.9568	57.8519	33.3315	127.14	81.9808	3	3	0
ENSMUSG00000063856	23024	ENSMUST00000082429, ENSMUST00000191997, ENSMUST00000193987	Gpx1	protein_coding	cds, 5utr	CTC, NA	TGA, NA	chr9	+	222.333	-7.66667	-365	108339447	108339449	19.6919	18.5343	20.5425	24.2547	21.4489	12.2523	57.9559	58.7687	3	3	0
ENSMUSG00000064288	5907	ENSMUST00000102983	H4c12	protein_coding	cds	TAC	GCG	chr13	-	264	87.5	-15.5	21750242	21750240	27.5998	25.6734	36.0318	37.2758	23.3619	44.9552	105.593	89.305	3	3	0
ENSMUSG00000064288	5913	ENSMUST00000102983	H4c12	protein_coding	cds	ACC	CGC	chr13	-	162	54	-49	21750344	21750342	16.9183	26.8599	11.9435	30.5908	106.984	192.942	330.517	55.7217	3	3	0
ENSMUSG00000064341	23340	ENSMUST00000082392	mt-Nd1	protein_coding	cds	CAC	ATA	chrMT	+	510	170	-148	3260	3262	38.308	80.3761	31.0456	61.9806	86.4098	79.1755	227.566	149.73	3	3	0
ENSMUSG00000064351	23369	ENSMUST00000082402	mt-Co1	protein_coding	cds	GAT	ATA	chrMT	+	270	90	-424	5597	5599	70.3274	40.671	77.254	78.3157	94.6699	130.929	303.915	188.252	3	3	0
ENSMUSG00000064351	23371	ENSMUST00000082402	mt-Co1	protein_coding	cds	GCC	ATA	chrMT	+	522	174	-340	5849	5851	25.8415	34.4528	22.4877	29.9266	24.3582	35.7491	90.0339	82.782	3	3	0
ENSMUSG00000064354	23404	ENSMUST00000082405	mt-Co2	protein_coding	cds	ATA	GAA	chrMT	+	48	16	-211	7060	7062	18.6593	17.3717	14.9933	53.7387	33.7854	36.4875	124.012	51.0243	3	3	0
ENSMUSG00000064354	23417	ENSMUST00000082405	mt-Co2	protein_coding	cds	ACC	ATA	chrMT	+	294	97.5	-129.5	7306	7308	23.5912	27.8985	17.0133	37.3744	53.0323	37.4054	127.812	68.5031	3	3	0
ENSMUSG00000064357	23429	ENSMUST00000082408	mt-Atp6	protein_coding	cds	ATA	ATA	chrMT	+	39	13	-213	7965	7967	23.4239	30.8	32.9143	48.5073	61.057	67.8333	177.398	87.1382	3	3	0
ENSMUSG00000064357	23431	ENSMUST00000082408	mt-Atp6	protein_coding	cds	ATT	ATA	chrMT	+	69	23	-203	7995	7997	20.3333	17.3205	21.2657	40.1133	27.1689	33.8758	101.158	58.9195	3	3	0
ENSMUSG00000064357	23432	ENSMUST00000082408	mt-Atp6	protein_coding	cds	ATA	TTT	chrMT	+	72	24	-202	7998	8000	11.547	21.7433	10.0395	48.5073	66.9096	81.1667	196.584	43.3298	3	3	0
ENSMUSG00000064357	23442	ENSMUST00000082408	mt-Atp6	protein_coding	cds	CCA	ATA	chrMT	+	414	137.333	-88.3333	8340	8342	32.9355	30.1603	29.6467	49.2124	26.5439	27.0741	102.83	92.7425	3	3	0
ENSMUSG00000064357	23447	ENSMUST00000082408	mt-Atp6	protein_coding	cds	TTA	ATA	chrMT	+	507	169	-57	8433	8435	70.8123	64.8243	39.8064	65.1619	36.9326	46.2501	148.345	175.443	3	3	0
ENSMUSG00000064358	23449	ENSMUST00000082409	mt-Co3	protein_coding	cds	GTA	ATA	chrMT	+	93	31	-229	8699	8701	70.1442	65.5801	53.7792	72.0186	81.492	161.391	314.902	189.503	3	3	0
ENSMUSG00000064358	23450	ENSMUST00000082409	mt-Co3	protein_coding	cds	ATA	TGA	chrMT	+	96	32	-228	8702	8704	45.5257	51.6527	35.99	101.077	79.4653	67.7171	248.259	133.168	3	3	0
ENSMUSG00000064358	23451	ENSMUST00000082409	mt-Co3	protein_coding	cds	ACA	ATA	chrMT	+	156	52	-208	8762	8764	35.2971	37.4835	23.0425	48.8169	19.4834	41.0236	109.324	95.8231	3	3	0
ENSMUSG00000064358	23455	ENSMUST00000082409	mt-Co3	protein_coding	cds	ATT	ATA	chrMT	+	498	166	-94	9104	9106	28.8439	49.2837	28.0146	60.6213	27.5477	56.1672	144.336	106.142	3	3	0
ENSMUSG00000064363	23478	ENSMUST00000082414	mt-Nd4	protein_coding	cds	CTA	ATA	chrMT	+	222	74	-384	10388	10390	52.0257	43.2441	32.0444	72.1592	45.9431	50.9916	169.094	127.314	3	3	0
ENSMUSG00000064368	23535	ENSMUST00000082419	mt-Nd6	protein_coding	cds	ATA	GTT	chrMT	-	159	52.5	-119	13912	13910	14.7012	21.9393	12.5831	32.3582	36.5269	24.2191	93.1042	49.2236	3	3	0
ENSMUSG00000064368	23536	ENSMUST00000082419	mt-Nd6	protein_coding	cds	TTA	ATA	chrMT	-	156	51.5	-120.5	13915	13913	38.2049	45.3729	24.2726	58.1039	45.2559	64.6159	167.976	107.85	3	3	0
ENSMUSG00000064370	23539	ENSMUST00000082421	mt-Cytb	protein_coding	cds	CTA	ATA	chrMT	+	120	39.5	-340.5	14264	14266	22.8258	17.8921	18.6978	19.696	13.0051	25.2913	57.9924	59.4156	3	3	0
ENSMUSG00000064370	23550	ENSMUST00000082421	mt-Cytb	protein_coding	cds	ATC	ATA	chrMT	+	699	233	-147	14843	14845	46.4556	31.0985	47.7917	54.4774	23.6784	57.8085	135.964	125.346	3	3	0
ENSMUSG00000064373	8020	ENSMUST00000160787, ENSMUST00000159158, ENSMUST00000160311, ENSMUST00000160930, ENSMUST00000082424	Selenop	protein_coding	cds	AGC	TGA	chr15	+	306.4	58.5	-134.1	3274844	3274846	13.8812	34.1267	21.6227	55.7583	44.4518	40.2634	140.473	69.6306	3	3	0
ENSMUSG00000064373	8021	ENSMUST00000159216	Selenop	protein_coding	cds	AGC	TGA	chr15	+	316	56.5	-323	3274845	3274847	14.4338	40.6667	22.7215	54.6021	54.0759	42.8239	151.502	77.8219	3	3	0
ENSMUSG00000065968	9272	ENSMUST00000117803, ENSMUST00000178021	Ifitm7	protein_coding	cds	TTC	ATG	chr16	-	564	62.3333	-67.3333	13983678	13983676	10.6066	20.9759	11.0188	31.5534	29.8354	57.3583	118.747	42.6013	3	3	0
ENSMUSG00000066037	16213	ENSMUST00000131671, ENSMUST00000105850, ENSMUST00000148843, ENSMUST00000084219, ENSMUST00000134524	Hnrnpr	protein_coding	cds	GAT	GAA	chr4	+	433.6	81.1	-437.5	136317173	136317175	11.4309	27.1595	12.0968	33.4908	97.8556	78.1176	209.464	50.6873	3	3	0
ENSMUSG00000066037	16216	ENSMUST00000131671, ENSMUST00000105850, ENSMUST00000148843, ENSMUST00000084219	Hnrnpr	protein_coding	cds	CCA	GAC	chr4	+	1275.25	360	-221	136339241	136339243	16.9552	16.5319	22.3647	29.7854	77.2656	62.9019	169.953	55.8517	3	3	0
ENSMUSG00000066232	20249	ENSMUST00000084731	Ipo7	protein_coding	cds	TAT	GAA	chr7	+	1267	371.5	-666	110044666	110044668	22.9005	21.9792	10.589	21.1346	20.5733	10.7193	52.4271	55.4687	3	3	0
ENSMUSG00000066551	17760	ENSMUST00000085546, ENSMUST00000110505, ENSMUST00000093196	Hmgb1	protein_coding	cds	AGA	GCT	chr5	-	842.667	162	-53	149048899	149048897	38.5276	61.108	47.7791	98.0229	119.672	94.4467	312.142	147.415	3	3	0
ENSMUSG00000066551	17762	ENSMUST00000085546, ENSMUST00000110505, ENSMUST00000093196, ENSMUST00000139443	Hmgb1	protein_coding	cds	CTG	AAG	chr5	-	749	150	-54	149049748	149049746	10.8823	17.045	17.7967	27.1832	27.562	11.4442	66.1894	45.7239	3	3	0
ENSMUSG00000067455	5896	ENSMUST00000087714	H4c11	protein_coding	cds	ACC	CGC	chr13	+	194	54	-49	21735257	21735259	17.0663	27.8036	12.2358	33.3205	110.422	180.352	324.094	57.1058	3	3	0
ENSMUSG00000067455	5903	ENSMUST00000087714	H4c11	protein_coding	cds	TAC	GCG	chr13	+	296	87.5	-15.5	21735359	21735361	24.7742	27.059	39.133	36.6196	21.2492	44.5539	102.423	90.9663	3	3	0
ENSMUSG00000068040	13518	ENSMUST00000089027	Tm9sf4	protein_coding	cds	TGC	CAG	chr2	+	443	62.5	-580	153182447	153182449	14.9671	15.5902	12.6557	28.9333	45.8621	34.3523	109.148	43.213	3	3	0
ENSMUSG00000068614	13195	ENSMUST00000090269	Actc1	protein_coding	cds	ATC	ATG	chr2	-	524	123	-254	114050374	114050372	23.6714	21.2285	21.9107	57.0027	59.8533	26.808	143.664	66.8106	3	3	0
ENSMUSG00000068854	14626	ENSMUST00000090781	H2bc21	protein_coding	cds	AAG	GCC	chr3	+	395	116	-10	96221513	96221515	17.589	15.0676	15.75	15.5316	22.9395	17.0084	55.4795	48.4066	3	3	0
ENSMUSG00000069117	7087	ENSMUST00000074072	Rps18-ps6	protein_coding	cds	GAC	TGG	chr13	-	284	80	-72	97760305	97760303	17.0474	19.2878	21.2473	27.7295	59.7495	98.6466	186.126	57.5824	3	3	0
ENSMUSG00000069265	6680	ENSMUST00000091701	H3c1	protein_coding	cds	ATC	ATG	chr13	-	390	119	-17	23761997	23761995	18.5246	25.9372	19.1757	32.094	52.2003	29.4902	113.784	63.6376	3	3	0
ENSMUSG00000069265	6684	ENSMUST00000091701	H3c1	protein_coding	cds	AAC	CTG	chr13	-	357	108	-28	23762030	23762028	21.4268	33.2648	20.557	39.4912	77.7424	156.582	273.816	75.2486	3	3	0
ENSMUSG00000069265	6699	ENSMUST00000091701	H3c1	protein_coding	cds	TAC	CGT	chr13	-	156	41	-95	23762231	23762229	20.0918	29.4642	15.3258	50.2155	60.6555	47.3069	158.178	64.8817	3	3	0
ENSMUSG00000069265	6703	ENSMUST00000091701	H3c1	protein_coding	cds	GCT	CGC	chr13	-	54	7	-129	23762333	23762331	16.0544	32.4228	18.9966	33.4394	44.2657	21.364	99.0691	67.4738	3	3	0
ENSMUSG00000069266	6648	ENSMUST00000102965	H4c2	protein_coding	cds	ACC	CGC	chr13	+	170	54	-49	23757182	23757184	18.6132	26.4793	12.7983	33.8136	104.248	177.771	315.832	57.8909	3	3	0
ENSMUSG00000069266	6654	ENSMUST00000102965	H4c2	protein_coding	cds	TAC	GCG	chr13	+	272	87.5	-15.5	23757284	23757286	24.611	27.4556	37.5872	38.5422	23.1892	48.3283	110.06	89.6539	3	3	0
ENSMUSG00000069267	6617	ENSMUST00000091703	H3c2	protein_coding	cds	GCT	CGC	chr13	+	134	7	-129	23752400	23752402	16.2873	25.686	19.5292	30.2831	34.1535	13.692	78.1285	61.5025	3	3	0
ENSMUSG00000069267	6621	ENSMUST00000091703	H3c2	protein_coding	cds	TAC	CGT	chr13	+	236	41	-95	23752502	23752504	17.1322	30.6386	13.4193	52.0371	51.7753	40.8817	144.694	61.1901	3	3	0
ENSMUSG00000069267	6636	ENSMUST00000091703	H3c2	protein_coding	cds	AAC	CTG	chr13	+	437	108	-28	23752703	23752705	19.6065	32.7332	19.581	40.9826	78.3338	162.902	282.219	71.9207	3	3	0
ENSMUSG00000069268	6377	ENSMUST00000105106	H2bc7	protein_coding	cds	GTG	ACC	chr13	-	60	18	-108	23574137	23574135	22.9001	17.8905	15.9694	34.9416	35.3623	16.6971	87.0011	56.76	3	3	0
ENSMUSG00000069273	6327	ENSMUST00000105107	H3c6	protein_coding	cds	AAC	CTG	chr13	-	328	108	-28	23562042	23562040	22.292	33.4599	17.9041	40.1729	76.0659	159.211	275.45	73.656	3	3	0
ENSMUSG00000069273	6330	ENSMUST00000105107	H3c6	protein_coding	cds	GAG	GCG	chr13	-	286	94	-42	23562084	23562082	68.1627	69.7063	87.9311	97.417	49.9534	11.3584	158.729	225.8	3	3	0
ENSMUSG00000069273	6340	ENSMUST00000105107	H3c6	protein_coding	cds	TAC	CGT	chr13	-	127	41	-95	23562243	23562241	31.3154	46.5002	22.0022	74.5613	57.2391	43.3758	175.176	99.8179	3	3	0
ENSMUSG00000069273	6344	ENSMUST00000105107	H3c6	protein_coding	cds	GCT	CGC	chr13	-	25	7	-129	23562345	23562343	16.5442	26.5337	17.2161	31.0554	40.6384	19.6028	91.2966	60.294	3	3	0
ENSMUSG00000069274	6300	ENSMUST00000102971	H4c6	protein_coding	cds	TAC	GCG	chr13	-	269	87.5	-15.5	23551380	23551378	20.453	15.2993	37.6246	35.9098	22.193	51.8954	109.998	73.3769	3	3	0
ENSMUSG00000069300	6199	ENSMUST00000110452	H2bc11	protein_coding	cds	TCG	GTG	chr13	+	130	37.5	-88.5	22043343	22043345	14.2366	22.1939	11.6632	17.1053	34.7054	35.3553	87.166	48.0936	3	3	0
ENSMUSG00000069302	6130	ENSMUST00000091742	H2ac12	protein_coding	cds	AAG	ACC	chr13	-	373	119	-9	22035196	22035194	16.0211	24.6707	12.7283	12.9404	32.6191	60.154	105.714	53.4201	3	3	0
ENSMUSG00000069303	6126	ENSMUST00000180288, ENSMUST00000110467	Hist1h2br	protein_coding, nonsense_mediated_decay	cds	ACC	AAG	chr13	+	377.5	119	-11	21834127	21834129	10.9153	26.2707	13.6987	27.2858	84.4555	113.182	224.923	50.8848	3	3	0
ENSMUSG00000069305	6083	ENSMUST00000102979	Hist1h4n	protein_coding	cds	TAC	GCG	chr13	-	302	87.5	-15.5	21831895	21831893	21.539	17.4543	50.2975	39.9106	18.8725	38.6739	97.4571	89.2908	3	3	0
ENSMUSG00000069306	6066	ENSMUST00000104941	Hist1h4m	protein_coding	cds	ACC	CGC	chr13	+	200	54	-49	21811945	21811947	13.8688	24.2405	12.3825	27.8647	90.1662	169.444	287.474	50.4918	3	3	0
ENSMUSG00000069306	6072	ENSMUST00000104941	Hist1h4m	protein_coding	cds	TAC	GCG	chr13	+	302	87.5	-15.5	21812047	21812049	22.8328	16.663	46.8061	40.9213	17.1036	36.3891	94.4139	86.3019	3	3	0
ENSMUSG00000069307	6022	ENSMUST00000110469	Hist1h2bq	nonsense_mediated_decay	cds	ACC	AAG	chr13	-	383	119	-7	21809815	21809813	11.2704	26.3688	13.0072	30.3962	88.7572	100.326	219.479	50.6463	3	3	0
ENSMUSG00000069307	6023	ENSMUST00000091749	Hist1h2bq	protein_coding	cds	ACC	AAG	chr13	-	383	119	-15	21809817	21809815	13.1772	25.141	11.4861	26.9196	86.8353	118.495	232.25	49.8044	3	3	0
ENSMUSG00000069308	6017	ENSMUST00000110473, ENSMUST00000102982	Hist1h2bp	protein_coding	cds	AAG	GCT	chr13	+	378.5	116	-16	21787862	21787864	29.5822	23.8736	24.6367	24.6666	28.2552	47.7874	100.709	78.0925	3	3	0
ENSMUSG00000069308	6018	ENSMUST00000110473, ENSMUST00000102982	Hist1h2bp	protein_coding	cds	ACC	AAG	chr13	+	387.5	119	-13	21787871	21787873	15.0638	22.3722	13.3477	29.7476	36.3649	20.7253	86.8377	50.7837	3	3	0
ENSMUSG00000069309	6004	ENSMUST00000091751	Hist1h2an	protein_coding	cds	TCG	GAG	chr13	-	120	39.5	-90	21787099	21787097	25.6762	25.1865	28.1465	46.9633	20.5605	12.1555	79.6793	79.0091	3	3	0
ENSMUSG00000069310	6570	ENSMUST00000091752	H3c3	protein_coding	cds	ATC	ATG	chr13	-	462	119	-17	23745040	23745038	19.5154	21.2729	18.8439	29.5243	38.2726	11.2699	79.0669	59.6322	3	3	0
ENSMUSG00000069310	6573	ENSMUST00000091752	H3c3	protein_coding	cds	AAC	CTG	chr13	-	429	108	-28	23745073	23745071	23.231	33.6451	21.2521	41.1543	76.1693	154.925	272.248	78.1283	3	3	0
ENSMUSG00000069310	6588	ENSMUST00000091752	H3c3	protein_coding	cds	TAC	CGT	chr13	-	228	41	-95	23745274	23745272	16.3799	30.2686	14.9827	49.2149	57.3434	41.9526	148.511	61.6311	3	3	0
ENSMUSG00000069310	6592	ENSMUST00000091752	H3c3	protein_coding	cds	GCT	CGC	chr13	-	126	7	-129	23745376	23745374	14.9836	25.6657	17.7238	30.7765	37.8241	18.6595	87.2601	58.3731	3	3	0
ENSMUSG00000071072	2378	ENSMUST00000052798	Ptges3	protein_coding	cds	TCT	GAG	chr10	+	700	122.5	-37	128072151	128072153	11.4512	18.0434	13.4807	38.7948	25.7332	20.0175	84.5454	42.9753	3	3	0
ENSMUSG00000071415	4186	ENSMUST00000103146	Rpl23	protein_coding	cds	AGA	AAA	chr11	-	348	89	-51	97778338	97778336	16.4827	33.0667	31.5514	60.8872	34.8909	12.1976	107.976	81.1008	3	3	0
ENSMUSG00000071415	4190	ENSMUST00000103146	Rpl23	protein_coding	cds	AAG	AAA	chr11	-	276	64.5	-75.5	97781365	97781363	15.0452	13.0904	10.4049	10.2035	11.6324	21.3851	43.221	38.5405	3	3	0
ENSMUSG00000071478	6389	ENSMUST00000090776	H2ac7	protein_coding	cds	TCG	GAG	chr13	+	210	39.5	-90	23574679	23574681	27.0529	22.4772	27.4489	51.2592	20.2197	11.6137	83.0926	76.979	3	3	0
ENSMUSG00000071516	5848	ENSMUST00000070124	H2ac13	protein_coding	cds	AAG	ACC	chr13	+	357	119	-11	21716778	21716780	15.1422	28.9388	11.8596	13.7258	31.9703	56.8639	102.56	55.9406	3	3	0
ENSMUSG00000071528	12330	ENSMUST00000096014	Atp5md	protein_coding	cds	CCT	AAG	chr19	-	224	48	-10	47085973	47085971	18.2599	27.0915	11.5287	25.2311	47.422	36.5398	109.193	56.88	3	3	0
ENSMUSG00000071547	7501	ENSMUST00000090212	Nt5dc2	protein_coding	cds	GAC	GAT	chr14	+	221	21.5	-368	31135512	31135514	16.392	40.4145	23.7426	45.3599	35.2184	19.0904	99.6688	80.5491	3	3	0
ENSMUSG00000071650	11942	ENSMUST00000096246	Ganab	protein_coding	cds	TTC	CTA	chr19	+	1179	386	-580	8910550	8910552	20.6657	34.6196	25.0674	63.3886	10.3738	17.139	90.9014	80.3528	3	3	0
ENSMUSG00000071866	2619	ENSMUST00000132846	Ppia	protein_coding	cds	TTT	CGA	chr11	+	573	35	-129	6418230	6418232	14.0273	26.5007	14.1143	22.58	47.1893	43.4057	113.175	54.6423	3	3	0
ENSMUSG00000071866	2620	ENSMUST00000090749	Ppia	nonsense_mediated_decay	cds	TTC	GAG	chr11	+	152	36.5	-3	6418231	6418233	16.7336	28.1623	17.4995	26.5609	47.1326	43.4724	117.166	62.3954	3	3	0
ENSMUSG00000071866	2628	ENSMUST00000132846	Ppia	protein_coding	cds	ATT	ATT	chr11	+	633	54.5	-109.5	6418290	6418292	11.1719	14.4418	12.9217	21.8365	39.2762	23.4603	84.5731	38.5354	3	3	0
ENSMUSG00000071866	2639	ENSMUST00000132846	Ppia	protein_coding	cds	TCC	ATC	chr11	+	696	75.5	-88.5	6419151	6419153	16.3434	19.9196	19.927	24.4873	33.9428	39.2451	97.6753	56.1901	3	3	0
ENSMUSG00000071866	2640	ENSMUST00000090749	Ppia	nonsense_mediated_decay	3utr	NA	NA	chr11	+	275	233	111	6419152	6419154	18.72	22.3739	22.5942	29.0475	34.3603	38.692	102.1	63.6881	3	3	0
ENSMUSG00000071866	2669	ENSMUST00000132846	Ppia	protein_coding	cds	CTG	GAT	chr11	+	831	121	-43	6419478	6419480	12.2717	14.5387	13.7834	26.1028	57.5328	28.2698	111.905	40.5938	3	3	0
ENSMUSG00000072235	8913	ENSMUST00000097014	Tuba1a	protein_coding	cds	GAT	GCT	chr15	-	541	96.5	-354.5	98950947	98950945	26.2883	19.8216	16.6973	25.489	36.1785	29.7543	91.4219	62.8072	3	3	0
ENSMUSG00000073702	196	ENSMUST00000086535, ENSMUST00000194746, ENSMUST00000178079, ENSMUST00000179954, ENSMUST00000195123	Rpl31	protein_coding	cds	GAT	GTG	chr1	+	269.6	60	-58.2	39370086	39370088	18.411	20.8574	18.6878	30.1172	37.5063	58.3073	125.931	57.9562	3	3	0
ENSMUSG00000074129	19821	ENSMUST00000150350	Rpl13a	protein_coding	cds	CTG	AAG	chr7	-	431	128	-75	45126483	45126481	29.1065	34.5024	37.4071	39.0457	60.2698	40.8753	140.191	101.016	3	3	0
ENSMUSG00000074403	14742	ENSMUST00000098843	H3c13	protein_coding	cds	TAC	CGG	chr3	+	163	41	-95	96268816	96268818	16.1302	15.6067	30.8168	23.5517	27.4404	11.2141	62.2062	62.5537	3	3	0
ENSMUSG00000075031	6600	ENSMUST00000099703	H2bc3	protein_coding	cds	TCG	GTG	chr13	+	175	38	-88	23746964	23746966	10.8223	11.3572	11.3352	16.2436	27.3637	16.5633	60.1707	33.5147	3	3	0
ENSMUSG00000075700	14153	ENSMUST00000107924	Selenot	protein_coding	cds	TCC	TGA	chr3	+	242	47	-148	58585234	58585236	46.2981	67.1873	15.9167	34.2929	14.8339	10.8891	60.0158	129.402	3	3	0
ENSMUSG00000078193	972	ENSMUST00000102782	Gm2000	protein_coding	cds	ATA	CGA	chr1	+	176	46	-77	156366215	156366217	23.8517	36.8078	43.3722	42.4002	26.7831	13.5712	82.7546	104.032	3	3	0
ENSMUSG00000078193	984	ENSMUST00000102782	Gm2000	protein_coding	cds	CTG	AAG	chr1	+	341	101	-22	156366380	156366382	16.1529	50.2171	19.2527	35.8155	23.2346	15.5094	74.5596	85.6227	3	3	0
ENSMUSG00000081906	3876	ENSMUST00000182502	Rpl9-ps1	protein_coding	cds	AAC	AAG	chr11	-	501	167	-24	83645121	83645119	10.948	47.9883	24.4116	34.8006	98.1899	41.1634	174.154	83.3479	3	3	0
ENSMUSG00000081906	3879	ENSMUST00000182502	Rpl9-ps1	protein_coding	cds	TCC	GAA	chr11	-	339	113	-78	83645283	83645281	61.547	53.4911	59.1331	84.2549	50.681	26.5147	161.451	174.171	3	3	0
ENSMUSG00000083780	15589	ENSMUST00000184254, ENSMUST00000185012	Gm12728	protein_coding	cds	TTT	GCA	chr4	+	96	32	-45	105794290	105794292	13.9262	15.7121	17.5907	27.4761	86.0606	94.451	207.988	47.229	3	3	0
ENSMUSG00000083780	15590	ENSMUST00000184254, ENSMUST00000185012	Gm12728	protein_coding	cds	GCA	GAC	chr4	+	99	33	-44	105794293	105794295	12.301	11.6945	12.7719	14.7375	21.8991	23.6128	60.2494	36.7674	3	3	0
ENSMUSG00000090137	21084	ENSMUST00000129909, ENSMUST00000125184, ENSMUST00000081940, ENSMUST00000124967, ENSMUST00000165126, ENSMUST00000140679, ENSMUST00000135446	Uba52	protein_coding	cds	TCC	CTT	chr8	-	420.111	79.7778	-44.3333	70508479	70508477	11.7977	17.4308	11.6982	34.5138	19.9843	12.0937	66.5918	40.9268	3	3	0
ENSMUSG00000090862	20336	ENSMUST00000170953	Rps13	protein_coding	cds	CAC	GGG	chr7	-	259	56.5	-94.5	116333074	116333072	47.3659	46.1433	61.0724	65.7613	33.9328	36.799	136.493	154.582	3	3	0
ENSMUSG00000091405	14732	ENSMUST00000171473	H4c14	protein_coding	cds	CGC	AAG	chr3	-	241	78	-25	96263071	96263069	31.6871	74.5608	30.6869	36.5596	13.0362	13.1214	62.7172	136.935	3	3	0
ENSMUSG00000092035	17831	ENSMUST00000166678, ENSMUST00000176204	Peg10	protein_coding	cds, 3utr	CCA, NA	GAT, NA	chr6	+	2225	1236.5	169	4756076	4756078	29.8868	41.6101	28.2822	45.824	29.5333	47.6529	123.01	99.7792	3	3	0
ENSMUSG00000092035	17832	ENSMUST00000176204	Peg10	protein_coding	3utr	NA	NA	chr6	+	2227	1856	726	4756077	4756079	34.3488	38.7683	26.1912	46.0774	23.1391	32.1806	101.397	99.3083	3	3	0
ENSMUSG00000092035	17859	ENSMUST00000176551	Peg10	protein_coding	cds	CCA	GAT	chr6	+	2126	217	-387	4757452	4757454	48.6944	66.5737	44.2949	75.0824	29.5333	47.6691	152.285	159.563	3	3	0
ENSMUSG00000092232	7738	ENSMUST00000134077	Gm20521	protein_coding	cds	GGT	GCA	chr14	+	786	208	-125	54895825	54895827	15	33.234	26.2747	37.3588	91.3349	115.735	244.429	74.5087	3	3	0
ENSMUSG00000093674	2448	ENSMUST00000176906	Rpl41	protein_coding	cds	GAT	GAG	chr10	-	220	26	-20	128548409	128548407	15.4861	27.4349	27.6652	36.9457	21.7497	12.1057	70.8011	70.5863	3	3	0
ENSMUSG00000093674	2451	ENSMUST00000176906	Rpl41	protein_coding	cds	AAG	AAA	chr10	-	214	24	-22	128548415	128548413	12.7767	39.0179	11.9129	31.1248	36.94	60.2675	128.332	63.7076	3	3	0
ENSMUSG00000093674	2452	ENSMUST00000177163, ENSMUST00000176683, ENSMUST00000176010	Rpl41	protein_coding	cds	AGG	CTG	chr10	-	203	11	-14	128548660	128548658	31.1207	17.1904	33.7671	36.8204	72.2115	91.9556	200.987	82.0782	3	3	0
ENSMUSG00000093769	14707	ENSMUST00000177796, ENSMUST00000176059	H3c14	protein_coding	cds	TAC	CGG	chr3	+	324	63.5	-95	96247008	96247010	16.1302	15.6067	29.7	23.5517	27.9889	13.1057	64.6464	61.4369	3	3	0
ENSMUSG00000094338	5835	ENSMUST00000091756	H2bc13	protein_coding	cds	AAG	GCA	chr13	-	348	116	-10	21715796	21715794	19.0833	21.8529	28.6468	14.878	15.5929	36.2374	66.7082	69.5831	3	3	0
ENSMUSG00000094338	5836	ENSMUST00000091756	H2bc13	protein_coding	cds	GCT	TCC	chr13	-	231	76.5	-49	21715913	21715911	20.3118	27.3019	25.7742	51.7691	22.8369	13.7521	88.3581	73.3879	3	3	0
ENSMUSG00000096010	18968	ENSMUST00000179285	H4f16	protein_coding	cds	CAC	GCC	chr6	-	261	75	-28	136804171	136804169	19.8711	34.8996	31.7556	34.3522	59.2253	73.413	166.99	86.5264	3	3	0
ENSMUSG00000096486	2145	ENSMUST00000074615	Gm5426	protein_coding	cds	TAC	GCC	chr10	+	96	31.5	-71.5	96136698	96136700	17.4118	25.6237	26.5835	45.6158	11.404	12.4536	69.4734	69.619	3	3	0
ENSMUSG00000097148	7267	ENSMUST00000181173	Gm3839	protein_coding	cds	TAC	GGC	chr14	-	1458	315	-18	11280989	11280987	31.4943	24.6927	14.9631	34.804	65.1224	78.5322	178.459	71.1501	3	3	0
ENSMUSG00000097148	7269	ENSMUST00000181173	Gm3839	protein_coding	cds	GGG	GCT	chr14	-	1398	295	-38	11281049	11281047	46.2011	57.3471	28.2057	112.687	69.2711	13.6282	195.587	131.754	3	3	0
ENSMUSG00000097148	7298	ENSMUST00000181173	Gm3839	protein_coding	cds	GGT	GTG	chr14	-	906	131	-202	11281541	11281539	21.3197	12.6199	11.0314	15.226	42.5487	12.0667	69.8414	44.971	3	3	0
ENSMUSG00000097148	7317	ENSMUST00000181173	Gm3839	protein_coding	cds	AAC	GAC	chr14	-	606	31	-302	11281841	11281839	14.3295	14.6385	14.5365	29.9558	36.756	17.9382	84.65	43.5044	3	3	0
ENSMUSG00000098274	9551	ENSMUST00000023269	Rpl24	protein_coding	cds	TCT	CTT	chr16	+	414	85	-72	55969572	55969574	13.039	10.6451	16.5545	16.5086	33.3718	59.1486	109.029	40.2386	3	3	0
ENSMUSG00000098549	219	ENSMUST00000183590	Gm5269	protein_coding	cds	CAT	GAC	chr1	-	57	19	-26	45890022	45890020	57.8016	84.931	75.186	139.873	121.899	59.4001	321.172	217.919	3	3	0
ENSMUSG00000098559	24202	ENSMUST00000183728	Gm15013	protein_coding	cds	GCT	TGC	chrX	-	762	254	-12	139713720	139713718	13.5345	11.6457	10.7515	14.0533	16.3147	19.5892	49.9572	35.9317	3	3	0
ENSMUSG00000098559	24220	ENSMUST00000183728	Gm15013	protein_coding	cds	CAC	AAG	chrX	-	105	35	-231	139714377	139714375	23.3121	35.4437	18.6153	48.1082	75.6228	38.1576	161.889	77.3711	3	3	0
ENSMUSG00000098640	13547	ENSMUST00000184654	Gm14214	protein_coding	cds	CCT	GTC	chr2	-	276	92	-133	154769657	154769655	76.1287	72.4186	52.2497	127.109	22.6894	13.7093	163.507	200.797	3	3	0
ENSMUSG00000099104	9826	ENSMUST00000184183	Gm17087	protein_coding	cds	CGT	GTG	chr17	-	210	70	-86	8566660	8566658	42.7468	63.9629	41.5646	71.1833	67.4272	62.6696	201.28	148.274	3	3	0
ENSMUSG00000099104	9827	ENSMUST00000184183	Gm17087	protein_coding	cds	CCC	ATT	chr17	-	135	45	-111	8566735	8566733	12.7425	19.863	20.9775	38.5488	19.1522	11.4553	69.1564	53.5831	3	3	0
ENSMUSG00000099115	7065	ENSMUST00000185178	Gm17190	protein_coding	cds	TTT	GAA	chr13	+	270	90	-267	96082427	96082429	27.6667	34.872	13.8636	38.9487	57.5104	29.1023	125.561	76.4022	3	3	0
ENSMUSG00000099115	7067	ENSMUST00000185178	Gm17190	protein_coding	cds	CAT	GAC	chr13	+	363	121	-236	96082520	96082522	51.2721	70.5221	87.8497	154.825	28.0781	40.8088	223.712	209.644	3	3	0
ENSMUSG00000099294	15479	ENSMUST00000184252	Gm11214	protein_coding	cds	TGG	TAT	chr4	-	480	159.5	-23	63662431	63662429	16.9476	19.4608	12.111	24.1903	62.9031	72.941	160.034	48.5193	3	3	0
ENSMUSG00000099294	15486	ENSMUST00000184252	Gm11214	protein_coding	cds	AAG	GCT	chr4	-	186	61.5	-121.5	63662725	63662723	37.7614	40.58	47.1745	77.2711	43.0148	25.2998	145.586	125.516	3	3	0
ENSMUSG00000099517	6256	ENSMUST00000080859	H3c8	protein_coding	cds	AAC	CTG	chr13	+	348	108	-28	23535781	23535783	21.752	35.426	22.5861	41.9982	76.5147	156.672	275.185	79.7641	3	3	0
ENSMUSG00000099517	6259	ENSMUST00000080859	H3c8	protein_coding	cds	ATC	ATG	chr13	+	381	119	-17	23535814	23535816	19.4489	16.9212	19.0801	29.359	42.6215	18.9506	90.9311	55.4501	3	3	0
ENSMUSG00000099583	6396	ENSMUST00000105105	H3c4	protein_coding	cds	GCT	CGC	chr13	+	60	7	-129	23575822	23575824	16.5074	27.286	19.2123	33.7268	31.2205	12.3708	77.3181	63.0057	3	3	0
ENSMUSG00000099583	6400	ENSMUST00000105105	H3c4	protein_coding	cds	TAC	CGT	chr13	+	162	41	-95	23575924	23575926	16.5712	30.9355	16.4613	48.4559	60.6905	52.0056	161.152	63.968	3	3	0
ENSMUSG00000099583	6413	ENSMUST00000105105	H3c4	protein_coding	cds	GAG	GCG	chr13	+	321	94	-42	23576083	23576085	67.3843	68.5992	88.3359	96.8764	49.5578	13.9638	160.398	224.319	3	3	0
ENSMUSG00000099583	6417	ENSMUST00000105105	H3c4	protein_coding	cds	ATC	ATG	chr13	+	396	119	-17	23576158	23576160	20.787	15.2229	17.5511	26.7899	36.9353	16.0922	79.8174	53.5611	3	3	0
ENSMUSG00000100210	6284	ENSMUST00000075558	H3c7	protein_coding	cds	GAG	GCG	chr13	+	715	94	-42	23545179	23545181	61.0881	69.5143	83.9124	98.2492	50.8239	12.8288	161.902	214.515	3	3	0
ENSMUSG00000100210	6286	ENSMUST00000075558	H3c7	protein_coding	cds	AAC	CTG	chr13	+	757	108	-28	23545221	23545223	20.1327	31.7239	19.062	40.3067	77.9133	154.06	272.28	70.9187	3	3	0
ENSMUSG00000100210	6289	ENSMUST00000075558	H3c7	protein_coding	cds	ATC	ATG	chr13	+	790	119	-17	23545254	23545256	14.0187	11.9473	16.1001	20.1511	37.3166	17.7298	75.1974	42.0661	3	3	0
ENSMUSG00000101355	5852	ENSMUST00000188775	H3c10	protein_coding	cds	GCT	CGC	chr13	+	21	7	-129	21717679	21717681	17.7685	30.8183	17.869	32.3453	45.7478	22.0887	100.182	66.4558	3	3	0
ENSMUSG00000101355	5856	ENSMUST00000188775	H3c10	protein_coding	cds	TAC	CGT	chr13	+	123	41	-95	21717781	21717783	18.0505	30.5645	13.97	49.5891	63.7716	47.3243	160.685	62.5849	3	3	0
ENSMUSG00000101355	5872	ENSMUST00000188775	H3c10	protein_coding	cds	AAC	CTG	chr13	+	324	108	-28	21717982	21717984	20.2299	32.7899	21.5617	43.9913	74.1831	155.152	273.326	74.5816	3	3	0
ENSMUSG00000101355	5875	ENSMUST00000188775	H3c10	protein_coding	cds	ATC	ATG	chr13	+	357	119	-17	21718015	21718017	18.3036	16.7005	20.6922	27.9958	45.8614	19.6809	93.5381	55.6963	3	3	0
ENSMUSG00000101972	5977	ENSMUST00000189457	H3c11	protein_coding	cds	ATC	ATG	chr13	-	357	119	-17	21783014	21783012	21.1921	15.3733	18.0377	26.9601	39.8037	18.0222	84.7859	54.6031	3	3	0
ENSMUSG00000101972	5980	ENSMUST00000189457	H3c11	protein_coding	cds	AAC	CTG	chr13	-	324	108	-28	21783047	21783045	21.9721	32.7235	17.8765	42.6154	77.2919	159.361	279.269	72.5722	3	3	0
ENSMUSG00000101972	5995	ENSMUST00000189457	H3c11	protein_coding	cds	TAC	CGT	chr13	-	123	41	-95	21783248	21783246	17.5196	30.0872	16.1247	48.6848	61.4082	48.606	158.699	63.7315	3	3	0
ENSMUSG00000101972	5999	ENSMUST00000189457	H3c11	protein_coding	cds	GCT	CGC	chr13	-	21	7	-129	21783350	21783348	17.8321	29.5326	20.1165	33.0999	42.0534	22.357	97.5103	67.4811	3	3	0
ENSMUSG00000105827	14778	ENSMUST00000177113	H2bc18	protein_coding	cds	CTG	CTG	chr3	+	300	100	-26	96270051	96270053	21.9638	50.7926	19.4416	55.3029	31.0596	12.0268	98.3893	92.1979	3	3	0
ENSMUSG00000109324	19778	ENSMUST00000107843	Prmt1	protein_coding	cds	TGG	GAG	chr7	-	895	215	-156	44978244	44978242	29.7881	48.1757	37.3708	69.774	51.539	52.4516	173.765	115.335	3	3	0
ENSMUSG00000109324	19785	ENSMUST00000045325	Prmt1	protein_coding	cds	TGG	GAG	chr7	-	524	162	-156	44979452	44979450	29.013	48.6974	37.6808	70.0181	50.3809	52.4516	172.851	115.391	3	3	0
ENSMUSG00000116358	8898	ENSMUST00000134214	Gm49450	protein_coding	cds	GAT	GCT	chr15	-	389	96.5	-169.5	98950776	98950774	24.1086	19.0535	15.6665	22.691	33.837	26.6576	83.1855	58.8285	3	3	0
ENSMUSG00000117310	137	ENSMUST00000076587	Ptp4a1	protein_coding	3utr	NA	NA	chr1	-	340	169	38	30946506	30946504	15.8005	20.5151	10.2424	35.6643	53.0756	12.8813	101.621	46.5581	3	3	0
NA	5886	ENSMUST00000110476	NA	NA	cds	ACC	AAG	chr13	+	357	119	-7	21722454	21722456	11.9027	22.711	11.5091	27.8446	82.1822	126.538	236.565	46.1227	3	3	0
NA	6265	ENSMUST00000078156	NA	NA	cds	ACC	AAG	chr13	-	357	119	-7	23543001	23542999	12.4548	25.4627	13.463	27.2694	75.9809	102.672	205.922	51.3805	3	3	0
ENSMUSG00000000740	21662	ENSMUST00000000756	Rpl13	protein_coding	cds	ACT	TGG	chr8	+	171	23	-188	123102727	123102729	12.6493	10.2673	10.5647	NA	NA	NA	NA	33.4812	0	3	-3
ENSMUSG00000003429	19799	ENSMUST00000003521	Rps11	protein_coding	cds	CAT	TAC	chr7	-	407	92.5	-65	45122853	45122851	18.7793	14.2885	14.3512	NA	NA	NA	NA	47.419	0	3	-3
ENSMUSG00000003814	21286	ENSMUST00000003912	Calr	protein_coding	cds	GTA	CAG	chr8	-	412	91.5	-324	84845983	84845981	11.6963	10.2476	10.8396	NA	NA	NA	NA	32.7835	0	3	-3
ENSMUSG00000003970	8362	ENSMUST00000004072	Rpl8	protein_coding	cds	AAG	CGG	chr15	+	252	70	-187	76904603	76904605	11.8162	16.1565	20.4859	NA	NA	NA	NA	48.4586	0	3	-3
ENSMUSG00000003970	8374	ENSMUST00000004072	Rpl8	protein_coding	cds	CCT	TCG	chr15	+	492	150	-107	76904980	76904982	10.8591	16.9711	10.4614	NA	NA	NA	NA	38.2916	0	3	-3
ENSMUSG00000004771	22563	ENSMUST00000171100	Rab11a	protein_coding	5utr	NA	NA	chr9	-	209	-60	-299	64726756	64726754	19.4809	15.2343	12.7333	NA	NA	NA	NA	47.4485	0	3	-3
ENSMUSG00000004771	22564	ENSMUST00000172298, ENSMUST00000169058, ENSMUST00000004892	Rab11a	protein_coding	cds	GAA	AAT	chr9	-	385	98.5	-75.5	64726757	64726755	19.9313	11.6861	11.2887	NA	NA	NA	NA	42.9062	0	3	-3
ENSMUSG00000004849	17468	ENSMUST00000150603, ENSMUST00000111080, ENSMUST00000144303	Ap1s1	protein_coding	cds	GAG	AGG	chr5	-	257.25	42.25	-128.25	137043168	137043166	10.0228	12.4502	15.9827	NA	NA	NA	NA	38.4556	0	3	-3
ENSMUSG00000006333	19054	ENSMUST00000108623, ENSMUST00000146927, ENSMUST00000108624	Rps9	protein_coding, nonsense_mediated_decay	3utr	NA	NA	chr7	+	694	665	310	3706703	3706705	13.6233	10.3072	13.774	NA	NA	NA	NA	37.7045	0	3	-3
ENSMUSG00000015656	21989	ENSMUST00000015800, ENSMUST00000117557	Hspa8	protein_coding	cds	GAA	CCA	chr9	+	704.5	164	-472	40802849	40802851	13.6692	13.5585	11.9257	NA	NA	NA	NA	39.1534	0	3	-3
ENSMUSG00000015656	22013	ENSMUST00000015800, ENSMUST00000117557	Hspa8	protein_coding	cds	CTG	GAC	chr9	+	1157.5	315.5	-321	40803384	40803386	19.1493	15.2032	12.0252	NA	NA	NA	NA	46.3776	0	3	-3
ENSMUSG00000015668	23959	ENSMUST00000015812, ENSMUST00000059099	Pdzd11	protein_coding	cds	AAC	AAT	chrX	-	522.5	35	-104.5	100624858	100624856	12.6375	13.4263	13.3292	NA	NA	NA	NA	39.3931	0	3	-3
ENSMUSG00000017404	4214	ENSMUST00000092425, ENSMUST00000017548	Rpl19	protein_coding	cds	CGG	AAA	chr11	+	244	62	-133	98028422	98028424	18.0001	22.2041	15.171	NA	NA	NA	NA	55.3752	0	3	-3
ENSMUSG00000017778	7014	ENSMUST00000078764, ENSMUST00000131011, ENSMUST00000132233	Cox7c	protein_coding	cds	GCA	CCT	chr13	-	427.2	36.2	-13.4	86045795	86045793	10.5848	11.3533	10.1352	NA	NA	NA	NA	32.0733	0	3	-3
ENSMUSG00000020372	3027	ENSMUST00000020640	Rack1	protein_coding	cds	CAT	TCA	chr11	+	542	145.5	-171	48803412	48803414	19.7647	14.7553	12.5868	NA	NA	NA	NA	47.1067	0	3	-3
ENSMUSG00000020390	3154	ENSMUST00000020657, ENSMUST00000109086	Ube2b	protein_coding	cds	GAC	CCA	chr11	-	183.5	17.5	-134	51997889	51997887	17.2975	18.9491	10.709	NA	NA	NA	NA	46.9556	0	3	-3
ENSMUSG00000020460	2843	ENSMUST00000102845, ENSMUST00000102844	Rps27a	protein_coding	cds	CAT	TAC	chr11	-	623	138	-18	29545937	29545935	16.0144	10.9952	16.3285	NA	NA	NA	NA	43.3381	0	3	-3
ENSMUSG00000020469	2607	ENSMUST00000102921	Myl7	protein_coding	cds	GGT	CCC	chr11	-	265	81	-93	5897884	5897882	14.0902	14.9298	11.5911	NA	NA	NA	NA	40.6111	0	3	-3
ENSMUSG00000020571	5148	ENSMUST00000057288	Pdia6	protein_coding	cds	GCA	CCC	chr12	+	1273	399.5	-45	17283227	17283229	13.3037	14.171	10.4084	NA	NA	NA	NA	37.8831	0	3	-3
ENSMUSG00000020738	4600	ENSMUST00000021084	Sumo2	nonsense_mediated_decay	3utr	NA	NA	chr11	-	381	269	108	115523721	115523719	11.7676	14.9296	14.6887	NA	NA	NA	NA	41.3859	0	3	-3
ENSMUSG00000020738	4601	ENSMUST00000121185, ENSMUST00000117589, ENSMUST00000118155, ENSMUST00000153892	Sumo2	protein_coding	cds	GGA	GGT	chr11	-	338.25	63	-4	115523722	115523720	14.6047	14.0239	18.0777	NA	NA	NA	NA	46.7063	0	3	-3
ENSMUSG00000020949	5360	ENSMUST00000021332	Fkbp3	protein_coding	cds	GAA	CCA	chr12	-	661	191	-32	65062722	65062720	10.7874	10.9697	11.8246	NA	NA	NA	NA	33.5817	0	3	-3
ENSMUSG00000021076	5406	ENSMUST00000021479	Actr10	protein_coding	cds	CCG	CTG	chr12	+	1316	405.5	-11	70962012	70962014	11.4316	13.3333	10.457	NA	NA	NA	NA	35.222	0	3	-3
ENSMUSG00000021109	5440	ENSMUST00000110461, ENSMUST00000021530	Hif1a	protein_coding	cds	AAC	CTA	chr12	+	2676.5	806	-16	73945652	73945654	11.7851	12.943	12.3831	NA	NA	NA	NA	37.1112	0	3	-3
ENSMUSG00000021270	5670	ENSMUST00000094361, ENSMUST00000021698	Hsp90aa1	protein_coding	cds	ATC	TAC	chr12	-	2205	687.5	-45	110692142	110692140	12.9283	10.3093	13.0918	NA	NA	NA	NA	36.3294	0	3	-3
ENSMUSG00000022241	8109	ENSMUST00000022849	Tars	protein_coding	cds	CAC	ATC	chr15	-	1512	461.5	-260	11388315	11388313	10.6534	15.1667	14.4338	NA	NA	NA	NA	40.2538	0	3	-3
ENSMUSG00000023004	8777	ENSMUST00000077577	Tuba1b	protein_coding	cds	GTG	CAC	chr15	-	1442	404	-47	98931726	98931724	10.6198	14.6124	14.2297	NA	NA	NA	NA	39.4619	0	3	-3
ENSMUSG00000023004	8840	ENSMUST00000077577	Tuba1b	protein_coding	cds	CCT	GAT	chr15	-	323	31	-420	98933106	98933104	16.8771	10.2627	12.7947	NA	NA	NA	NA	39.9345	0	3	-3
ENSMUSG00000023944	10687	ENSMUST00000024739, ENSMUST00000165127	Hsp90ab1	protein_coding	cds	GAG	ATG	chr17	-	945	283	-159.5	45569310	45569308	14.6432	12.2207	11.8895	NA	NA	NA	NA	38.7534	0	3	-3
ENSMUSG00000024576	11442	ENSMUST00000165721, ENSMUST00000163205, ENSMUST00000170862, ENSMUST00000165123, ENSMUST00000115246, ENSMUST00000166990, ENSMUST00000167187	Csnk1a1	protein_coding	cds	GGA	CCC	chr18	+	674.1	92.7	-253.2	61568312	61568314	13.5084	13.2486	18.2266	NA	NA	NA	NA	44.9835	0	3	-3
ENSMUSG00000024608	11407	ENSMUST00000025511	Rps14	protein_coding	cds	CTT	TCT	chr18	+	231	46	-105	60776454	60776456	11.4565	12.1753	10.2417	NA	NA	NA	NA	33.8735	0	3	-3
ENSMUSG00000024608	11413	ENSMUST00000122279, ENSMUST00000118551, ENSMUST00000127568, ENSMUST00000137400	Rps14	protein_coding	cds	CTT	TCT	chr18	+	234.75	46	-93.25	60776540	60776542	15.2155	14.3815	10.5915	NA	NA	NA	NA	40.1884	0	3	-3
ENSMUSG00000024608	11424	ENSMUST00000118551, ENSMUST00000137400, ENSMUST00000122279, ENSMUST00000127568	Rps14	protein_coding	cds	GAG	TTG	chr18	+	354.75	86	-53.25	60777038	60777040	12.6667	10.5369	11.4537	NA	NA	NA	NA	34.6573	0	3	-3
ENSMUSG00000024949	11758	ENSMUST00000113488, ENSMUST00000155973, ENSMUST00000131252, ENSMUST00000113489, ENSMUST00000113487	Sf1	protein_coding	cds	AAA	AAG	chr19	+	547.5	93.1667	-395	6371336	6371338	10.8591	16.1928	13.9002	NA	NA	NA	NA	40.952	0	3	-3
ENSMUSG00000024990	12161	ENSMUST00000112335	Rbp4	protein_coding	cds	TGC	CTA	chr19	-	620	176.5	-24	38118292	38118290	15.6543	28.1254	17.7552	NA	NA	NA	NA	61.5349	0	3	-3
ENSMUSG00000024990	12166	ENSMUST00000025951	Rbp4	protein_coding	cds	TGC	CTA	chr19	-	843	220.5	-24	38118382	38118380	17.0042	28.1254	20.2848	NA	NA	NA	NA	65.4145	0	3	-3
ENSMUSG00000025428	11544	ENSMUST00000026495, ENSMUST00000114748	Atp5a1	protein_coding	cds	TTG	CTA	chr18	+	1832	443	-84	77781334	77781336	11.5592	12.5794	12.1222	NA	NA	NA	NA	36.2608	0	3	-3
ENSMUSG00000025508	20736	ENSMUST00000084434, ENSMUST00000106004, ENSMUST00000106003	Rplp2	protein_coding	cds	GCA	GCA	chr7	+	410	89	-26	141451098	141451100	12.5627	11.2342	13.3015	NA	NA	NA	NA	37.0985	0	3	-3
ENSMUSG00000025794	23201	ENSMUST00000165532	Rpl14	protein_coding	cds	AGA	TGG	chr9	+	362	89	-128	120573803	120573805	17.1508	14.5987	14.6534	NA	NA	NA	NA	46.4029	0	3	-3
ENSMUSG00000027239	13093	ENSMUST00000028672, ENSMUST00000069423, ENSMUST00000090602, ENSMUST00000111309	Mdk	protein_coding	cds	CCC	TGC	chr2	-	378.75	69	-71	91931124	91931122	11.5684	13.6229	10.0241	NA	NA	NA	NA	35.2155	0	3	-3
ENSMUSG00000027562	13959	ENSMUST00000192609, ENSMUST00000029078	Car2	protein_coding	cds	GGC	TCA	chr3	+	574.5	97	-90	14895080	14895082	13.1778	10.5238	13	NA	NA	NA	NA	36.7016	0	3	-3
ENSMUSG00000027620	13642	ENSMUST00000148794	Rbm39	protein_coding	cds	AAT	GGC	chr2	-	594	197.5	-111.5	156159057	156159055	12.4415	10.5674	11.7851	NA	NA	NA	NA	34.794	0	3	-3
ENSMUSG00000027944	14434	ENSMUST00000079724	Hax1	protein_coding	cds	GAT	CCT	chr3	-	177	19.5	-260	89997986	89997984	10.328	16.985	16.6413	NA	NA	NA	NA	43.9542	0	3	-3
ENSMUSG00000028081	14295	ENSMUST00000029722	Rps3a1	protein_coding	cds	GGA	ACC	chr3	-	292	53	-211	86141705	86141703	12.8514	11.7833	11.3739	NA	NA	NA	NA	36.0085	0	3	-3
ENSMUSG00000028639	15863	ENSMUST00000079644	Ybx1	protein_coding	cds	CCA	CGA	chr4	-	961	239.5	-82	119281584	119281582	11.0663	11.726	14.7224	NA	NA	NA	NA	37.5147	0	3	-3
ENSMUSG00000029247	16817	ENSMUST00000031160, ENSMUST00000120912, ENSMUST00000117536	Paics	protein_coding	cds	TCA	TCT	chr5	+	1412.33	362	-62	76966383	76966385	12.941	12.5667	13.1451	NA	NA	NA	NA	38.6527	0	3	-3
ENSMUSG00000029405	16904	ENSMUST00000164378	G3bp2	protein_coding	cds	CAG	CCG	chr5	-	993	159.5	-322	92063361	92063359	10.6667	16.5421	10.7795	NA	NA	NA	NA	37.9883	0	3	-3
ENSMUSG00000029405	16908	ENSMUST00000167918	G3bp2	protein_coding	cds	CAG	CCG	chr5	-	727	159.5	-289	92065817	92065815	10.6667	15.9977	10.7795	NA	NA	NA	NA	37.444	0	3	-3
ENSMUSG00000029405	16909	ENSMUST00000113127	G3bp2	protein_coding	cds	CAG	CCG	chr5	-	695	159.5	-289	92065833	92065831	10.6667	16.0295	10.7795	NA	NA	NA	NA	37.4757	0	3	-3
ENSMUSG00000029405	16910	ENSMUST00000169094	G3bp2	protein_coding	cds	CAG	CCG	chr5	-	683	159.5	-322	92066498	92066496	10.6667	16.5421	10.7795	NA	NA	NA	NA	37.9883	0	3	-3
ENSMUSG00000029430	17316	ENSMUST00000031383, ENSMUST00000111343	Ran	protein_coding	cds	AAG	CTC	chr5	+	277	11	-205	129020571	129020573	18.3955	12.7881	12.9185	NA	NA	NA	NA	44.1021	0	3	-3
ENSMUSG00000029430	17330	ENSMUST00000031383, ENSMUST00000111343	Ran	protein_coding	cds	AAT	CTT	chr5	+	670	142	-74	129022181	129022183	11.235	11.1676	11.4572	NA	NA	NA	NA	33.8599	0	3	-3
ENSMUSG00000029447	17356	ENSMUST00000031402	Cct6a	protein_coding	cds	GCA	GAT	chr5	+	492	163.5	-368	129789972	129789974	10.4782	13.2679	10.8771	NA	NA	NA	NA	34.6231	0	3	-3
ENSMUSG00000029580	17617	ENSMUST00000100497, ENSMUST00000171419, ENSMUST00000106216	Actb	protein_coding	cds	ACC	AAC	chr5	-	341	77	-185.667	142905372	142905370	13.1055	24.0062	12.0268	NA	NA	NA	NA	49.1385	0	3	-3
ENSMUSG00000030603	19453	ENSMUST00000032824	Psmc4	protein_coding	cds	CGC	CTA	chr7	-	836	250.5	-167	28042897	28042895	23.094	22.6749	26.4252	NA	NA	NA	NA	72.1941	0	3	-3
ENSMUSG00000030744	20081	ENSMUST00000032998, ENSMUST00000107096	Rps3	protein_coding	cds	CCT	GTT	chr7	-	559.5	162	-55	99479928	99479926	29.2746	18.945	23.1215	NA	NA	NA	NA	71.3411	0	3	-3
ENSMUSG00000030795	20572	ENSMUST00000121616, ENSMUST00000106251, ENSMUST00000077609	Fus	protein_coding	cds	CAG	CCC	chr7	+	170	30	-408.333	127969768	127969770	10.2958	17.417	10.9661	NA	NA	NA	NA	38.6789	0	3	-3
ENSMUSG00000031320	24022	ENSMUST00000033683	Rps4x	protein_coding	cds	CTT	AAG	chrX	-	247	51	-212	102187931	102187929	18.8128	17.2554	12.949	NA	NA	NA	NA	49.0172	0	3	-3
ENSMUSG00000031320	24028	ENSMUST00000033683	Rps4x	protein_coding	cds	AAA	CAC	chrX	-	112	5.5	-257	102188357	102188355	14.0091	21.2761	14.8665	NA	NA	NA	NA	50.1517	0	3	-3
ENSMUSG00000031754	21362	ENSMUST00000034204	Nudt21	protein_coding	cds	GTC	ATT	chr8	-	556	138.5	-88	94028879	94028877	11.3137	13.2779	12.9768	NA	NA	NA	NA	37.5683	0	3	-3
ENSMUSG00000032096	22121	ENSMUST00000034607	Arcn1	protein_coding	cds	CAT	CCA	chr9	-	1160	328	-182	44751361	44751359	11.0153	18.6855	12.957	NA	NA	NA	NA	42.6578	0	3	-3
ENSMUSG00000032294	22442	ENSMUST00000034834	Pkm	protein_coding	cds	GAA	CTC	chr9	+	1483	396	-135	59675615	59675617	14.2581	10.8529	10.5614	NA	NA	NA	NA	35.6724	0	3	-3
ENSMUSG00000032518	23161	ENSMUST00000035105	Rpsa	protein_coding	cds	AGG	GAG	chr9	+	523	116	-179	120130290	120130292	13.5897	11.4319	11.0147	NA	NA	NA	NA	36.0363	0	3	-3
ENSMUSG00000035530	4312	ENSMUST00000049385, ENSMUST00000152521	Eif1	protein_coding	3utr	NA	NA	chr11	+	663.5	540	234	100321463	100321465	11.2283	21.2399	10.8321	NA	NA	NA	NA	43.3002	0	3	-3
ENSMUSG00000036181	6548	ENSMUST00000040914	H1f2	protein_coding	cds	AGC	GGC	chr13	+	203	54	-158	23739010	23739012	11.805	14.0627	10.044	NA	NA	NA	NA	35.9117	0	3	-3
ENSMUSG00000037563	19494	ENSMUST00000082134	Rps16	protein_coding	cds	GAG	CCG	chr7	+	278	42	-104	28351069	28351071	16.9273	23.0685	24.4951	NA	NA	NA	NA	64.4909	0	3	-3
ENSMUSG00000037742	22743	ENSMUST00000042235	Eef1a1	protein_coding	cds	GCT	GGT	chr9	-	1095	325	-137	78479332	78479330	20.0309	12.4545	18.2614	NA	NA	NA	NA	50.7468	0	3	-3
ENSMUSG00000038690	17704	ENSMUST00000161741, ENSMUST00000037056	Atp5j2	protein_coding	cds	CGC	AAG	chr5	-	597	78	-4	145183854	145183852	11.0606	14.4977	10.2975	NA	NA	NA	NA	35.8558	0	3	-3
ENSMUSG00000039221	13997	ENSMUST00000043867, ENSMUST00000194649, ENSMUST00000193168	Rpl22l1	protein_coding, nonsense_mediated_decay	cds, 3utr	CTG, NA	AAG, NA	chr3	+	261.667	120	-25.6667	28806811	28806813	18.8838	24.2494	18.6677	NA	NA	NA	NA	61.8009	0	3	-3
ENSMUSG00000040354	2290	ENSMUST00000134778	Mars1	protein_coding	cds	CCC	ACC	chr10	-	144	47.5	-135.5	127297539	127297537	10.2127	10.4819	12.7304	NA	NA	NA	NA	33.425	0	3	-3
ENSMUSG00000040952	19407	ENSMUST00000108428, ENSMUST00000153451, ENSMUST00000108429, ENSMUST00000156372, ENSMUST00000124035, ENSMUST00000108430	Rps19	protein_coding	cds	GTC	AGA	chr7	+	415.5	93.8333	-64	24888367	24888369	13.1964	13.5446	10.328	NA	NA	NA	NA	37.0691	0	3	-3
ENSMUSG00000042079	18577	ENSMUST00000035493, ENSMUST00000163168, ENSMUST00000180341, ENSMUST00000167182, ENSMUST00000180020	Hnrnpf	protein_coding	cds	GGC	TAC	chr6	+	1548.8	403	-12	117924965	117924967	10.7488	19.2577	13.8718	NA	NA	NA	NA	43.8783	0	3	-3
ENSMUSG00000043091	8936	ENSMUST00000058914	Tuba1c	protein_coding	cds	CCT	GAT	chr15	+	624	31	-418	99034183	99034185	16.8771	10.2627	12.7947	NA	NA	NA	NA	39.9345	0	3	-3
ENSMUSG00000043091	8995	ENSMUST00000058914	Tuba1c	protein_coding	cds	GTG	CAC	chr15	+	1743	404	-45	99037871	99037873	10.6198	14.6124	14.2297	NA	NA	NA	NA	39.4619	0	3	-3
ENSMUSG00000043716	94	ENSMUST00000149566	Rpl7	protein_coding	cds	GGA	AGC	chr1	-	282	94	-184	16103319	16103317	11.6303	17.3813	10.3373	NA	NA	NA	NA	39.3489	0	3	-3
ENSMUSG00000044533	10022	ENSMUST00000054289, ENSMUST00000170715	Rps2	protein_coding	cds	GAT	CAT	chr17	+	929.5	269.5	-23	24721811	24721813	14.1425	13.0646	13.7669	NA	NA	NA	NA	40.974	0	3	-3
ENSMUSG00000044533	10025	ENSMUST00000146867	Rps2	protein_coding	cds	GGC	TCC	chr17	+	895	290	-12	24721858	24721860	12.1766	25.2857	14.0685	NA	NA	NA	NA	51.5308	0	3	-3
ENSMUSG00000044533	10026	ENSMUST00000054289, ENSMUST00000170715	Rps2	protein_coding	cds	GCT	CCA	chr17	+	977.5	286	-7	24721859	24721861	11.5379	24.3107	14.5821	NA	NA	NA	NA	50.4307	0	3	-3
ENSMUSG00000046364	20241	ENSMUST00000143107	Rpl27a	protein_coding	cds	GGC	AAG	chr7	+	409	112	-36	109521618	109521620	16.6211	10.1491	11.8699	NA	NA	NA	NA	38.6402	0	3	-3
ENSMUSG00000046364	20242	ENSMUST00000143107	Rpl27a	protein_coding	cds	AAG	CTC	chr7	+	418	115	-33	109521627	109521629	13.1003	16.8592	12.9624	NA	NA	NA	NA	42.9219	0	3	-3
ENSMUSG00000047675	15733	ENSMUST00000102696	Rps8	protein_coding	cds	CTT	CTA	chr4	-	692	169.5	-38	117154306	117154304	15.9993	10.6831	13.6187	NA	NA	NA	NA	40.3011	0	3	-3
ENSMUSG00000050608	16250	ENSMUST00000143971	Micos10	protein_coding	cds	CTT	CTA	chr4	-	326	65	-10	139105014	139105012	22.0586	18.6136	10.5963	NA	NA	NA	NA	51.2685	0	3	-3
ENSMUSG00000051627	6488	ENSMUST00000062045	H1f4	protein_coding	cds	AGC	GGC	chr13	-	223	54	-165	23622280	23622278	12.2737	14.2227	10.044	NA	NA	NA	NA	36.5405	0	3	-3
ENSMUSG00000051695	18368	ENSMUST00000053015	Pcbp1	protein_coding	cds	GGG	CCT	chr6	-	592	61.5	-294	86525730	86525728	10.205	11.4498	15.0151	NA	NA	NA	NA	36.67	0	3	-3
ENSMUSG00000051855	17989	ENSMUST00000163949	Mest	protein_coding	cds	GAT	CCT	chr6	+	1109	283	-52	30746284	30746286	10.9786	13.7271	20.0137	NA	NA	NA	NA	44.7193	0	3	-3
ENSMUSG00000051855	17993	ENSMUST00000163949	Mest	protein_coding	cds	GAT	CCC	chr6	+	1217	319	-16	30747118	30747120	10.1146	10.6153	10.3653	NA	NA	NA	NA	31.0953	0	3	-3
ENSMUSG00000052146	10104	ENSMUST00000114881	Rps10	protein_coding	cds	CAG	CCA	chr17	-	588	161	-4	27630440	27630438	15.2917	16.92	17.1569	NA	NA	NA	NA	49.3686	0	3	-3
ENSMUSG00000052146	10113	ENSMUST00000025052	Rps10	protein_coding	cds	TCA	GCC	chr17	-	463	141.5	-12.5	27630481	27630479	12.9248	15.8806	15.1118	NA	NA	NA	NA	43.9172	0	3	-3
ENSMUSG00000052187	20172	ENSMUST00000033229	Hbb-y	protein_coding	cds	GAG	AAC	chr7	-	367	101	-46	103852784	103852782	11.9162	25.6978	27.2933	NA	NA	NA	NA	64.9072	0	3	-3
ENSMUSG00000052187	20176	ENSMUST00000033229	Hbb-y	protein_coding	cds	CCA	AGG	chr7	-	238	58	-89	103852913	103852911	14.3068	15.8351	13.9247	NA	NA	NA	NA	44.0666	0	3	-3
ENSMUSG00000052217	20157	ENSMUST00000063957	Hbb-bh1	protein_coding	cds	ATC	ATG	chr7	-	216	54	-93	103842844	103842842	17.5883	11.9243	12.9483	NA	NA	NA	NA	42.4609	0	3	-3
ENSMUSG00000055609	2872	ENSMUST00000020531	Hba-x	protein_coding	cds	GCT	GCT	chr11	+	318	18	-124	32276717	32276719	10.5294	11.0797	12.5135	NA	NA	NA	NA	34.1226	0	3	-3
ENSMUSG00000055609	2881	ENSMUST00000020531, ENSMUST00000145569	Hba-x	protein_coding	cds	CTG	CAT	chr11	+	411	93	-56	32277731	32277733	11.2531	12.3155	12.6927	NA	NA	NA	NA	36.2613	0	3	-3
ENSMUSG00000055609	2888	ENSMUST00000020531, ENSMUST00000145569	Hba-x	protein_coding	cds	GAC	AAG	chr11	+	531	133	-16	32277957	32277959	11.2079	15.1053	30.0824	NA	NA	NA	NA	56.3955	0	3	-3
ENSMUSG00000055681	21073	ENSMUST00000066469, ENSMUST00000128003	Cope	protein_coding	cds	CCT	GAG	chr8	+	816.5	223	-47	70311690	70311692	13.9054	13.9382	12.6517	NA	NA	NA	NA	40.4953	0	3	-3
ENSMUSG00000055681	21074	ENSMUST00000168018	Cope	nonsense_mediated_decay	3utr	NA	NA	chr8	+	709	697	359	70311691	70311693	12.7017	12.6108	12.2563	NA	NA	NA	NA	37.5687	0	3	-3
ENSMUSG00000057113	2921	ENSMUST00000075641, ENSMUST00000093201	Npm1	protein_coding	cds	CAG	TGG	chr11	-	976	272	-6	33152835	33152833	22.4967	13.2354	16.5256	NA	NA	NA	NA	52.2576	0	3	-3
ENSMUSG00000057666	18804	ENSMUST00000117757, ENSMUST00000118875, ENSMUST00000183272, ENSMUST00000073605	Gapdh	protein_coding	cds	GGG	GCT	chr6	-	678.5	193.75	-132.25	125162634	125162632	27.5513	27.7295	15.0641	NA	NA	NA	NA	70.3449	0	3	-3
ENSMUSG00000058773	5959	ENSMUST00000080511	H1f5	protein_coding	cds	AAG	CTT	chr13	-	386	105	-118	21780240	21780238	11.1337	10.7821	13.1816	NA	NA	NA	NA	35.0974	0	3	-3
ENSMUSG00000059070	19882	ENSMUST00000072503	Rpl18	protein_coding	cds	GAG	TCT	chr7	+	450	127	-60	45720380	45720382	14.1321	13.5043	10.7846	NA	NA	NA	NA	38.421	0	3	-3
ENSMUSG00000060377	7931	ENSMUST00000081987	Rpl36a-ps1	protein_coding	cds	GGA	GGC	chr14	-	297	93	-13	98994004	98994002	15.5866	14.9668	10.5791	NA	NA	NA	NA	41.1324	0	3	-3
ENSMUSG00000060678	6533	ENSMUST00000102967	H4c3	protein_coding	cds	AAG	GTG	chr13	-	182	59	-44	23698273	23698271	19.3455	12.058	10.5415	NA	NA	NA	NA	41.9449	0	3	-3
ENSMUSG00000061315	2325	ENSMUST00000073868	Naca	protein_coding	cds	CAG	CCT	chr10	+	162	17	-198	128035507	128035509	14.4956	22.6412	19.9869	NA	NA	NA	NA	57.1237	0	3	-3
ENSMUSG00000062070	24098	ENSMUST00000135949	Pgk1	nonsense_mediated_decay	3utr	NA	NA	chrX	+	1311	1222	455	106202905	106202907	15.6378	23.63	12.7395	NA	NA	NA	NA	52.0073	0	3	-3
ENSMUSG00000062683	9085	ENSMUST00000185641, ENSMUST00000187160, ENSMUST00000075630	Atp5g2	protein_coding	cds	CGT	CCG	chr15	-	125.667	26.3333	-106.667	102665814	102665812	13.5677	13.6623	12.4566	NA	NA	NA	NA	39.6866	0	3	-3
ENSMUSG00000062825	4724	ENSMUST00000071555, ENSMUST00000062147, ENSMUST00000106215	Actg1	protein_coding	cds	CAG	ATG	chr11	-	897.333	278.5	-22.5	120346459	120346457	16.3402	13.9019	19.5111	NA	NA	NA	NA	49.7532	0	3	-3
ENSMUSG00000062825	4729	ENSMUST00000131103	Actg1	nonsense_mediated_decay	3utr	NA	NA	chr11	-	1137	1065	667	120346497	120346495	10.056	10.4638	12.8944	NA	NA	NA	NA	33.4142	0	3	-3
ENSMUSG00000062825	4764	ENSMUST00000131103	Actg1	nonsense_mediated_decay	3utr	NA	NA	chr11	-	864	792	394	120346965	120346963	17.3022	23.6776	11.5943	NA	NA	NA	NA	52.574	0	3	-3
ENSMUSG00000063316	4366	ENSMUST00000077856, ENSMUST00000107249	Rpl27	protein_coding	cds	GCT	GGA	chr11	+	349	43	-93	101443548	101443550	17.887	14.5422	10.9107	NA	NA	NA	NA	43.3399	0	3	-3
ENSMUSG00000063689	14596	ENSMUST00000073115	H2ac21	protein_coding	cds	AAG	GGC	chr3	+	159	35.5	-94	96220023	96220025	12.1822	12.9997	11.3	NA	NA	NA	NA	36.4819	0	3	-3
ENSMUSG00000066551	17784	ENSMUST00000085546, ENSMUST00000110505, ENSMUST00000093196, ENSMUST00000139443, ENSMUST00000138553, ENSMUST00000125605	Hmgb1	protein_coding	cds	CAC	CCG	chr5	-	353	30	-141.833	149050648	149050646	12.3427	14.3428	10.8455	NA	NA	NA	NA	37.531	0	3	-3
ENSMUSG00000067148	10777	ENSMUST00000087026, ENSMUST00000124655	Polr1c	protein_coding	cds	CTC	AAG	chr17	-	815	248	-54	46244352	46244350	10.0573	18.6279	17.3093	NA	NA	NA	NA	45.9945	0	3	-3
ENSMUSG00000067288	10411	ENSMUST00000173019, ENSMUST00000087342, ENSMUST00000173879, ENSMUST00000173844, ENSMUST00000166693	Rps28	protein_coding	cds	GTG	CTC	chr17	-	195	51.4	-15	33823256	33823254	27.0172	30.1303	41.4793	NA	NA	NA	NA	98.6267	0	3	-3
ENSMUSG00000067455	5899	ENSMUST00000087714	H4c11	protein_coding	cds	AAG	GTG	chr13	+	209	59	-44	21735272	21735274	21.3331	12.8691	10.6043	NA	NA	NA	NA	44.8065	0	3	-3
ENSMUSG00000069273	6319	ENSMUST00000105107	H3c6	protein_coding	cds	CGT	ATC	chr13	-	391	129	-7	23561979	23561977	24.1281	21.6717	15.0812	NA	NA	NA	NA	60.881	0	3	-3
ENSMUSG00000069300	6203	ENSMUST00000110452	H2bc11	protein_coding	cds	GAC	ACC	chr13	+	169	51	-75	22043382	22043384	15.7176	22.0613	13.0182	NA	NA	NA	NA	50.7971	0	3	-3
ENSMUSG00000069302	6136	ENSMUST00000091742	H2ac12	protein_coding	cds	CTG	CTC	chr13	-	115	33	-95	22035454	22035452	19.5195	26.553	10.9608	NA	NA	NA	NA	57.0333	0	3	-3
ENSMUSG00000069310	6585	ENSMUST00000091752	H3c3	protein_coding	cds	GTG	GCG	chr13	-	243	46	-90	23745259	23745257	16.7171	21.425	10.8307	NA	NA	NA	NA	48.9728	0	3	-3
ENSMUSG00000069744	4170	ENSMUST00000103147	Psmb3	protein_coding	cds	GAG	AAG	chr11	+	377	96	-109	97706897	97706899	10.2328	10.708	12.0286	NA	NA	NA	NA	32.9694	0	3	-3
ENSMUSG00000069917	2907	ENSMUST00000093207	Hba-a2	protein_coding	cds	TAT	GGA	chr11	+	107	24	-118	32296595	32296597	15.0548	10.0539	21.1211	NA	NA	NA	NA	46.2298	0	3	-3
ENSMUSG00000069917	2915	ENSMUST00000093207	Hba-a2	protein_coding	cds	GTG	ACC	chr11	+	356	107	-35	32297100	32297102	27.0888	18.9002	27.0351	NA	NA	NA	NA	73.0241	0	3	-3
ENSMUSG00000069919	2901	ENSMUST00000093209	Hba-a1	protein_coding	cds	GTG	ACC	chr11	+	517	107	-35	32284283	32284285	26.4156	18.9002	26.3454	NA	NA	NA	NA	71.6613	0	3	-3
ENSMUSG00000070493	17382	ENSMUST00000094280	Chchd2	protein_coding	cds	GGG	GGC	chr5	-	466	81	-72	129883991	129883989	13.376	17.6579	12.675	NA	NA	NA	NA	43.709	0	3	-3
ENSMUSG00000071415	4187	ENSMUST00000103146	Rpl23	protein_coding	cds	TAT	CGA	chr11	-	342	87	-53	97778344	97778342	11.2149	12.3028	11.5729	NA	NA	NA	NA	35.0906	0	3	-3
ENSMUSG00000071415	4195	ENSMUST00000128801	Rpl23	protein_coding	cds	AAC	TTG	chr11	-	283	43	-16	97781455	97781453	11.5707	10.2417	10.1983	NA	NA	NA	NA	32.0107	0	3	-3
ENSMUSG00000072235	8851	ENSMUST00000097014	Tuba1a	protein_coding	cds	GTG	CAC	chr15	-	1462	404	-47	98950026	98950024	10.6198	14.6124	14.2297	NA	NA	NA	NA	39.4619	0	3	-3
ENSMUSG00000072235	8928	ENSMUST00000097014	Tuba1a	protein_coding	cds	CCT	GAT	chr15	-	343	31	-420	98951318	98951316	16.8771	10.2627	12.7947	NA	NA	NA	NA	39.9345	0	3	-3
ENSMUSG00000079435	24126	ENSMUST00000113211	Rpl36a	protein_coding	cds	GGA	GGC	chrX	+	342	93	-13	134587552	134587554	11.8075	11.026	10.07	NA	NA	NA	NA	32.9035	0	3	-3
ENSMUSG00000090451	11554	ENSMUST00000164064	Gm6133	protein_coding	cds	GTG	CCA	chr18	+	210	57	-133	78349963	78349965	11.7742	10.4756	11.4188	NA	NA	NA	NA	33.6686	0	3	-3
ENSMUSG00000090553	867	ENSMUST00000166915, ENSMUST00000166291, ENSMUST00000164096	Snrpe	protein_coding	cds	TAT	GAA	chr1	-	145.333	34.5	-43.3333	133608936	133608934	12.4332	11.5915	11.7998	NA	NA	NA	NA	35.8245	0	3	-3
ENSMUSG00000099104	9822	ENSMUST00000184183	Gm17087	protein_coding	cds	ACC	CAG	chr17	-	285	94.5	-61	8566585	8566583	15.2104	12.4279	13.0417	NA	NA	NA	NA	40.68	0	3	-3
ENSMUSG00000100210	6294	ENSMUST00000075558	H3c7	protein_coding	cds	CGT	ATC	chr13	+	820	129	-7	23545284	23545286	23.762	21.4366	15.6122	NA	NA	NA	NA	60.8109	0	3	-3
ENSMUSG00000101355	5859	ENSMUST00000188775	H3c10	protein_coding	cds	GTG	GCG	chr13	+	138	46	-90	21717796	21717798	14.2947	21.6977	11.8087	NA	NA	NA	NA	47.8011	0	3	-3
ENSMUSG00000101972	5992	ENSMUST00000189457	H3c11	protein_coding	cds	GTG	GCG	chr13	-	138	46	-90	21783233	21783231	15.966	21.5475	11.5813	NA	NA	NA	NA	49.0948	0	3	-3
ENSMUSG00000116358	8916	ENSMUST00000134214	Gm49450	protein_coding	cds	CCT	GAT	chr15	-	191	31	-235	98950974	98950972	16.8771	10.2627	12.7947	NA	NA	NA	NA	39.9345	0	3	-3

## Sheet: Hbs1l cerebellum
ensembl_gene_id	genome_index	ensembl_transcript_id	external_gene_name	transcript_biotype	region	P_codon	A_codon	chrom	strand	coordinate	relative_start	relative_end	spliced_start	spliced_end	Hbs1l_cerebellum_1	Hbs1l_cerebellum_2	Hbs1l_cerebellum_3	J_cerebellum_1	J_cerebellum_2	J_cerebellum_3	Hbs1l_pause_sum	Control_pause_sum	Hbs1l_pause_count	Control_pause_count	pause_difference
ENSMUSG00000002985	34223	ENSMUST00000172983, ENSMUST00000174144, ENSMUST00000173739, ENSMUST00000174355, ENSMUST00000003066	Apoe	protein_coding	cds	GCT	TTT	chr7	-	766.6	218	-61	19696662	19696660	19.3236	10.7785	28.9839	NA	NA	NA	59.0861	NA	3	0	3
ENSMUSG00000005575	34012	ENSMUST00000123541	Ube2m	protein_coding	cds	AGG	ACT	chr7	-	228	76	-96	13035904	13035902	10.8449	11.2435	15.9715	NA	NA	NA	38.06	NA	3	0	3
ENSMUSG00000007097	2054	ENSMUST00000085913, ENSMUST00000097464	Atp1a2	protein_coding	cds	CTG	TCC	chr1	-	1549	459	-524.5	172285738	172285736	10.3822	10.361	14.7108	NA	NA	NA	35.454	NA	3	0	3
ENSMUSG00000008730	25702	ENSMUST00000137078	Hipk1	nonsense_mediated_decay	3utr	NA	NA	chr3	-	2549	2377	218	103750906	103750904	15.0003	14.2715	15.9166	NA	NA	NA	45.1884	NA	3	0	3
ENSMUSG00000014313	13319	ENSMUST00000014457, ENSMUST00000153512, ENSMUST00000156915	Cox6c	protein_coding	cds	AAA	CCA	chr15	-	281	8	-68	35937248	35937246	16.6262	11.8209	10.9891	NA	NA	NA	39.4361	NA	3	0	3
ENSMUSG00000015023	38857	ENSMUST00000040416	Ddx19a	protein_coding	cds	GCA	GAA	chr8	-	206	43	-435	110990505	110990503	11.2246	11.6237	11.5539	NA	NA	NA	34.4022	NA	3	0	3
ENSMUSG00000015222	581	ENSMUST00000114012, ENSMUST00000114017, ENSMUST00000114015, ENSMUST00000077355, ENSMUST00000173855, ENSMUST00000024639, ENSMUST00000114018	Map2	protein_coding	cds	GGC	ACC	chr1	+	457.25	63.75	-426.625	66380703	66380705	10.5667	10.6667	12.9499	NA	NA	NA	34.1832	NA	3	0	3
ENSMUSG00000017686	6646	ENSMUST00000077451, ENSMUST00000092857, ENSMUST00000017831, ENSMUST00000055056	Rhot1	protein_coding	cds	ATG	AAG	chr11	+	217.75	13	-654.5	80209286	80209288	12.3289	13.435	10.6648	NA	NA	NA	36.4287	NA	3	0	3
ENSMUSG00000017978	31632	ENSMUST00000115358, ENSMUST00000115361, ENSMUST00000069074, ENSMUST00000115356, ENSMUST00000163871, ENSMUST00000018122	Cadps2	protein_coding	cds	CCG	CCG	chr6	-	241.667	31.5	-1167.33	23839042	23839040	12.4775	10.9376	11.955	NA	NA	NA	35.3701	NA	3	0	3
ENSMUSG00000018412	7611	ENSMUST00000018556	Kansl1	protein_coding	5utr	NA	NA	chr11	-	364	-110	-3220	104467665	104467663	10.0021	10.457	10.9355	NA	NA	NA	31.3946	NA	3	0	3
ENSMUSG00000018593	5592	ENSMUST00000141530, ENSMUST00000108858, ENSMUST00000018737	Sparc	protein_coding	cds	GTG	GGT	chr11	-	304.667	40	-218	55406592	55406590	12.4228	12.7618	14.7381	NA	NA	NA	39.9227	NA	3	0	3
ENSMUSG00000019505	5867	ENSMUST00000136938, ENSMUST00000019649	Ubb	protein_coding	cds	GAG	TCA	chr11	+	951.5	215	-55	62552790	62552792	14.8612	10.0403	17.036	NA	NA	NA	41.9375	NA	3	0	3
ENSMUSG00000019647	18986	ENSMUST00000076043, ENSMUST00000126684, ENSMUST00000115449, ENSMUST00000019791, ENSMUST00000135790, ENSMUST00000156422	Sema6a	protein_coding	cds	CAT	GGC	chr18	-	437	29.5	-854.417	47306366	47306364	16.8168	11.011	21.679	NA	NA	NA	49.5069	NA	3	0	3
ENSMUSG00000020288	4927	ENSMUST00000109539	Ahsa2	protein_coding	5utr	NA	NA	chr11	-	78	-138	-989	23497853	23497851	11.6358	10.236	14.2773	NA	NA	NA	36.1491	NA	3	0	3
ENSMUSG00000020886	6115	ENSMUST00000108588	Dlg4	protein_coding	5utr	NA	NA	chr11	+	97	-380	-2554	70018562	70018564	14.3623	11.5517	10.9821	NA	NA	NA	36.8961	NA	3	0	3
ENSMUSG00000021978	12481	ENSMUST00000022550	Extl3	protein_coding	5utr	NA	NA	chr14	-	86	-579	-3338	65098021	65098019	17.8148	10.457	11.2522	NA	NA	NA	39.524	NA	3	0	3
ENSMUSG00000022706	15297	ENSMUST00000023391	Mrpl40	protein_coding	cds	TTG	AAA	chr16	-	540	66.5	-139	18872662	18873537	20.323	10.248	16.3903	NA	NA	NA	46.9612	NA	3	0	3
ENSMUSG00000022706	15298	ENSMUST00000119273	Mrpl40	protein_coding	cds	TTG	AAA	chr16	-	246	22.5	-139	18873632	18873630	20.323	10.248	16.3903	NA	NA	NA	46.9612	NA	3	0	3
ENSMUSG00000022884	15473	ENSMUST00000023599, ENSMUST00000147117, ENSMUST00000077605, ENSMUST00000123413, ENSMUST00000131871, ENSMUST00000168891	Eif4a2	protein_coding, nonsense_mediated_decay	3utr	NA	NA	chr16	+	1818.17	1666.17	846.167	23113694	23113696	15.0578	21.7896	32.2454	NA	NA	NA	69.0929	NA	3	0	3
ENSMUSG00000025016	20471	ENSMUST00000025989	Tm9sf3	protein_coding	cds	GCG	GTG	chr19	-	1805	553.5	-30	41217142	41217140	10.7852	12.2381	22.7654	NA	NA	NA	45.7887	NA	3	0	3
ENSMUSG00000025203	20602	ENSMUST00000026221	Scd2	protein_coding	cds	CAC	AAT	chr19	+	1221	169	-189	44299679	44299681	10.837	11.3586	24.0765	NA	NA	NA	46.272	NA	3	0	3
ENSMUSG00000025351	4499	ENSMUST00000105229	Cd63	protein_coding	cds	CAT	GAG	chr10	+	376	44	-194	128911616	128911618	11.0509	12.6257	19.8907	NA	NA	NA	43.5673	NA	3	0	3
ENSMUSG00000025351	4500	ENSMUST00000026407	Cd63	protein_coding	cds	CAT	GAG	chr10	+	403	44	-194	128911838	128911840	11.0509	12.6257	19.8907	NA	NA	NA	43.5673	NA	3	0	3
ENSMUSG00000025666	43030	ENSMUST00000026760, ENSMUST00000171953	Tmem47	protein_coding	5utr	NA	NA	chrX	+	179.5	-46	-591	81070889	81070891	20.1013	13.9844	12.1426	NA	NA	NA	46.2283	NA	3	0	3
ENSMUSG00000026587	1718	ENSMUST00000193042, ENSMUST00000046110, ENSMUST00000170718, ENSMUST00000194369, ENSMUST00000195311	Astn1	protein_coding	cds	AAT	GAC	chr1	+	395.2	71	-1029.2	158362795	158362797	11.6386	10.8477	11.7411	NA	NA	NA	34.2274	NA	3	0	3
ENSMUSG00000027429	23382	ENSMUST00000143573, ENSMUST00000028916, ENSMUST00000155876, ENSMUST00000149697	Sec23b	protein_coding	cds	AAT	CCA	chr2	+	348.286	69.5714	-284.714	144559430	144559432	11.1708	10.6853	18.8526	NA	NA	NA	40.7087	NA	3	0	3
ENSMUSG00000027508	24452	ENSMUST00000161949, ENSMUST00000108384	Pag1	protein_coding	5utr	NA	NA	chr3	-	416.5	-208.5	-1497.5	9833239	9833237	15.7921	13.7119	14.4947	NA	NA	NA	43.9988	NA	3	0	3
ENSMUSG00000027777	24882	ENSMUST00000170788	Schip1	protein_coding	cds	AAT	GAG	chr3	+	428	13	-231	68596158	68596160	10.436	13.7891	30.0511	NA	NA	NA	54.2762	NA	3	0	3
ENSMUSG00000027823	24854	ENSMUST00000029405	Gmps	protein_coding	cds	GCC	GAA	chr3	+	1330	383.5	-309	63993913	63993915	10.2062	11.1218	17.3141	NA	NA	NA	38.6421	NA	3	0	3
ENSMUSG00000028070	25047	ENSMUST00000029708	Naxe	protein_coding	cds	AGT	CCC	chr3	-	305	100	-182	88058005	88058003	17.1564	12.9821	14.0121	NA	NA	NA	44.1507	NA	3	0	3
ENSMUSG00000028078	25010	ENSMUST00000029719	Dclk2	protein_coding	5utr	NA	NA	chr3	-	329	-354	-2624	86920524	86920522	14.6422	12.8904	10.7184	NA	NA	NA	38.251	NA	3	0	3
ENSMUSG00000028222	26550	ENSMUST00000029876	Calb1	protein_coding	cds	AAC	TTG	chr4	+	246	37	-224	15881989	15881991	12.1671	13.0044	17.8408	NA	NA	NA	43.0124	NA	3	0	3
ENSMUSG00000028426	26900	ENSMUST00000030134	Rad23b	protein_coding	cds	TAC	ATT	chr4	+	1414	365	-51	55385559	55385561	14.924	10.3995	12.4932	NA	NA	NA	37.8167	NA	3	0	3
ENSMUSG00000028688	27481	ENSMUST00000030451	Toe1	protein_coding	cds	CAG	TCA	chr4	-	1072	317	-194	116805020	116805018	20.3743	11.0872	21.362	NA	NA	NA	52.8234	NA	3	0	3
ENSMUSG00000029108	29390	ENSMUST00000094783	Pcdh7	protein_coding	cds	CAG	CCA	chr5	+	2840	944	-303	57721104	57721106	17.7158	18.0689	18.6191	NA	NA	NA	54.4038	NA	3	0	3
ENSMUSG00000029108	29396	ENSMUST00000195156	Pcdh7	nonsense_mediated_decay	cds	GCA	GCC	chr5	+	774	258	-120	57721935	57721937	15.9803	12.8458	11.8673	NA	NA	NA	40.6934	NA	3	0	3
ENSMUSG00000029108	29398	ENSMUST00000191837	Pcdh7	protein_coding	cds	CAG	CCA	chr5	+	3970	944	-311	57721990	57721992	17.1677	13.9064	15.0347	NA	NA	NA	46.1088	NA	3	0	3
ENSMUSG00000029108	29399	ENSMUST00000068110	Pcdh7	protein_coding	cds	CAG	CCA	chr5	+	3917	944	-125	57721997	57721999	17.5333	15.6551	17.703	NA	NA	NA	50.8914	NA	3	0	3
ENSMUSG00000030122	33284	ENSMUST00000032216	Ptms	protein_coding	5utr	NA	NA	chr6	-	208	-135	-440	124917739	124917737	17.685	13.2833	19.1184	NA	NA	NA	50.0867	NA	3	0	3
ENSMUSG00000031309	43610	ENSMUST00000148570, ENSMUST00000033671	Rps6ka3	protein_coding	cds	ATG	GCT	chrX	+	164	11	-444.5	159256155	159256157	10.5871	11.018	16.657	NA	NA	NA	38.2621	NA	3	0	3
ENSMUSG00000031428	43448	ENSMUST00000113067, ENSMUST00000101227, ENSMUST00000033804	Zcchc18	protein_coding	5utr	NA	NA	chrX	+	470.667	-191	-1372	136994005	136994007	13.0773	12.3955	10.2813	NA	NA	NA	35.7541	NA	3	0	3
ENSMUSG00000032187	39394	ENSMUST00000034707, ENSMUST00000174008, ENSMUST00000098948	Smarca4	protein_coding	cds	CCT	GGA	chr9	+	1056.33	276	-1338.67	21636250	21636252	13.369	14.2887	15.1333	NA	NA	NA	42.7911	NA	3	0	3
ENSMUSG00000034135	39959	ENSMUST00000122865	Sik3	protein_coding	cds	GCA	GCC	chr9	+	1260	420	-85	46198272	46198274	12.1554	12.5385	14.7012	NA	NA	NA	39.3952	NA	3	0	3
ENSMUSG00000034158	15735	ENSMUST00000078717	Lrrc58	protein_coding	3utr	NA	NA	chr16	+	3175	3067	1967	37883429	37883431	18.4447	10.4873	13.2384	NA	NA	NA	42.1704	NA	3	0	3
ENSMUSG00000035203	33950	ENSMUST00000098845, ENSMUST00000045277	Epn1	protein_coding	cds	GGG	GAT	chr7	+	1275.5	317	-258	5095142	5095144	12.069	10.9333	10.0436	NA	NA	NA	33.046	NA	3	0	3
ENSMUSG00000035469	12392	ENSMUST00000043227	Rcbtb1	protein_coding	5utr	NA	NA	chr14	+	363	-39	-1634	59209930	59209932	16.5247	16.179	30.3595	NA	NA	NA	63.0633	NA	3	0	3
ENSMUSG00000037916	19546	ENSMUST00000133474, ENSMUST00000134479	Ndufv1	protein_coding	5utr	NA	NA	chr19	-	66	-193.5	-991.5	4012622	4012620	12.5076	12.1321	17.7671	NA	NA	NA	42.4068	NA	3	0	3
ENSMUSG00000038518	10666	ENSMUST00000173246	Jarid2	protein_coding	5utr	NA	NA	chr13	+	224	-378	-4082	44731494	44731496	17.6124	11.8824	23.7986	NA	NA	NA	53.2934	NA	3	0	3
ENSMUSG00000038976	6991	ENSMUST00000038696	Ppp1r9b	protein_coding	5utr	NA	NA	chr11	+	68	-446	-2899	94991102	94991104	11.7866	14.4593	22.0507	NA	NA	NA	48.2966	NA	3	0	3
ENSMUSG00000039852	28489	ENSMUST00000105682, ENSMUST00000105680	Rere	protein_coding	cds	TGG	AAG	chr4	+	1274.5	302.5	-1121	150610880	150610882	15.7532	12.0822	27.3033	NA	NA	NA	55.1388	NA	3	0	3
ENSMUSG00000040479	22528	ENSMUST00000128152, ENSMUST00000142231, ENSMUST00000099709, ENSMUST00000028667, ENSMUST00000111303	Dgkz	nonsense_mediated_decay, protein_coding	3utr, cds	NA, AAA	NA, AAG	chr2	-	986.8	463.6	-265.8	91940653	91940651	19.2533	10.5135	15.02	NA	NA	NA	44.7868	NA	3	0	3
ENSMUSG00000041124	39232	ENSMUST00000047173	Msantd4	protein_coding	5utr	NA	NA	chr9	+	133	-14	-1051	4383667	4383669	16.6212	10.4354	13.4112	NA	NA	NA	40.4678	NA	3	0	3
ENSMUSG00000042978	36331	ENSMUST00000056028	Sbk1	protein_coding	cds	CGT	GAG	chr7	+	773	95	-322	126291101	126291103	10.4774	13.0733	12.437	NA	NA	NA	35.9877	NA	3	0	3
ENSMUSG00000044024	18866	ENSMUST00000177058, ENSMUST00000169360, ENSMUST00000176104, ENSMUST00000070709, ENSMUST00000163128, ENSMUST00000168056, ENSMUST00000091932	Rell2	protein_coding, nonsense_mediated_decay	cds	CAG	CCC	chr18	+	939.857	59	-165.571	37956560	37956562	10.7461	13.1321	12.4744	NA	NA	NA	36.3526	NA	3	0	3
ENSMUSG00000048540	25652	ENSMUST00000066187	Nhlh2	protein_coding	5utr	NA	NA	chr3	+	156	-767	-1174	102010300	102010302	12.5722	11.1436	25.1482	NA	NA	NA	48.8639	NA	3	0	3
ENSMUSG00000054871	41784	ENSMUST00000068140	Tmem158	protein_coding	5utr	NA	NA	chr9	-	174	-46	-906	123260616	123260614	18.0057	12.273	15.8796	NA	NA	NA	46.1584	NA	3	0	3
ENSMUSG00000060377	12829	ENSMUST00000081987	Rpl36a-ps1	protein_coding	cds	CCT	ATT	chr14	-	177	52.5	-53	98994124	98994122	15.1912	14.3355	16.2021	NA	NA	NA	45.7288	NA	3	0	3
ENSMUSG00000061482	10226	ENSMUST00000102968	H4c4	protein_coding	cds	CGC	ATC	chr13	+	139	45	-58	23581736	23581738	20.2897	10.0308	12.7145	NA	NA	NA	43.0351	NA	3	0	3
ENSMUSG00000061524	12991	ENSMUST00000075888	Zic2	protein_coding	cds	CCG	GGT	chr14	+	484	81	-448	122475918	122475920	14.9442	10.8502	19.4678	NA	NA	NA	45.2622	NA	3	0	3
ENSMUSG00000063021	9871	ENSMUST00000074752	H2ac15	protein_coding	cds	TCG	GAG	chr13	-	120	40	-90	21753708	21753706	22.4881	11.133	32.9185	NA	NA	NA	66.5396	NA	3	0	3
ENSMUSG00000066839	39428	ENSMUST00000180180, ENSMUST00000177967, ENSMUST00000098937	Ecsit	protein_coding	5utr	NA	NA	chr9	-	23.6667	-234	-1328	22085408	22085406	15.6839	19.7662	10.1067	NA	NA	NA	45.5568	NA	3	0	3
ENSMUSG00000068735	22565	ENSMUST00000111266, ENSMUST00000150462, ENSMUST00000090554	Trp53i11	protein_coding	5utr	NA	NA	chr2	+	115	-211	-677.333	93187674	93187676	21.7632	16.3788	16.0094	NA	NA	NA	54.1514	NA	3	0	3
ENSMUSG00000069273	10152	ENSMUST00000105107	H3c6	protein_coding	cds	TAC	CGT	chr13	-	127	41	-95	23562243	23562241	14.53	10.9646	11.0105	NA	NA	NA	36.5051	NA	3	0	3
ENSMUSG00000069308	9923	ENSMUST00000110473	Hist1h2bp	protein_coding	cds	GCT	GTC	chr13	+	405	117	-21	21787865	21787867	13.7188	12.1286	14.5076	NA	NA	NA	40.355	NA	3	0	3
ENSMUSG00000069662	2633	ENSMUST00000092584	Marcks	protein_coding	cds	CAG	CCG	chr10	-	1075	230	-79	37136348	37136346	11.9589	10.7363	28.6257	NA	NA	NA	51.321	NA	3	0	3
ENSMUSG00000074403	25533	ENSMUST00000098843	H3c13	protein_coding	cds	GCC	CCG	chr3	+	85	15	-121	96268738	96268740	30.8428	13.8461	16.3817	NA	NA	NA	61.0706	NA	3	0	3
ENSMUSG00000079037	23207	ENSMUST00000091288	Prnp	protein_coding	cds	AAT	CAG	chr2	+	469	95	-159	131936714	131936716	10.6554	13.3195	11.77	NA	NA	NA	35.7449	NA	3	0	3
ENSMUSG00000079435	43262	ENSMUST00000113211	Rpl36a	protein_coding	cds	CCT	ATT	chrX	+	222	52.5	-53	134586560	134586562	14.7437	10.7899	16.2021	NA	NA	NA	41.7357	NA	3	0	3
ENSMUSG00000079941	9786	ENSMUST00000044043	Cox5b-ps	protein_coding	cds	CTA	CCT	chr13	-	192	64	-65	21501227	21501225	21.0641	10.6899	29.3448	NA	NA	NA	61.0988	NA	3	0	3
ENSMUSG00000081058	25468	ENSMUST00000167403	H3c15	protein_coding	cds	GCC	CCG	chr3	-	231	15	-121	96238897	96238895	20.2317	11.4884	11.6306	NA	NA	NA	43.3507	NA	3	0	3
ENSMUSG00000090553	1409	ENSMUST00000164574, ENSMUST00000172079	Snrpe	protein_coding, nonsense_mediated_decay	3utr	NA	NA	chr1	-	439	232	23	133608935	133608933	10.435	11.8124	24.3647	NA	NA	NA	46.6121	NA	3	0	3
ENSMUSG00000098640	23629	ENSMUST00000184654	Gm14214	protein_coding	cds	TTC	ACC	chr2	-	141	47	-178	154769792	154769790	16.4726	11.2641	19.0737	NA	NA	NA	46.8104	NA	3	0	3
ENSMUSG00000104043	24970	ENSMUST00000193882	Gm6525	protein_coding	cds	CCT	ATT	chr3	+	829	52.5	-53	84174932	84174934	15.7334	11.2339	19.7566	NA	NA	NA	46.7239	NA	3	0	3
ENSMUSG00000104043	24972	ENSMUST00000193882	Gm6525	protein_coding	cds	GGC	CAA	chr3	+	970	100	-6	84175073	84175075	17.6667	10.4931	18.1362	NA	NA	NA	46.296	NA	3	0	3
ENSMUSG00000109336	34737	ENSMUST00000040531	Samd4b	protein_coding	5utr	NA	NA	chr7	-	143	-103	-2166	28423734	28423732	15.4064	12.6515	24.8253	NA	NA	NA	52.8831	NA	3	0	3
ENSMUSG00000000088	40230	ENSMUST00000000090	Cox5a	protein_coding	cds	GGG	TCA	chr9	+	166	39	-107	57521397	57521399	10.8212	14.4493	16.2197	12.1642	21.0504	21.6857	41.4901	54.9003	3	3	0
ENSMUSG00000000088	40232	ENSMUST00000000090	Cox5a	protein_coding	cds	CCA	GAC	chr9	+	223	58	-88	57528994	57528996	33.5593	16.5804	41.9884	17.5668	24.5347	11.9391	92.1282	54.0406	3	3	0
ENSMUSG00000000088	40235	ENSMUST00000000090	Cox5a	protein_coding	cds	TAT	GAT	chr9	+	274	75	-71	57529045	57529047	17.0079	11.1757	20.5372	23.1818	24.1087	23.917	48.7208	71.2075	3	3	0
ENSMUSG00000000088	40237	ENSMUST00000000090	Cox5a	protein_coding	cds	AAT	GAT	chr9	+	334	95	-51	57530273	57530275	17.7982	15.2226	29.3002	29.1606	37.3416	32.9606	62.321	99.4628	3	3	0
ENSMUSG00000000088	40239	ENSMUST00000000090	Cox5a	protein_coding	cds	GAA	ATC	chr9	+	397	116	-30	57530336	57530338	17.6975	15.5698	22.8502	20.9592	28.5556	22.8489	56.1175	72.3637	3	3	0
ENSMUSG00000000088	40241	ENSMUST00000000090	Cox5a	protein_coding	cds	AAT	GAA	chr9	+	439	130	-16	57531684	57531686	16.0728	14.3867	18.0645	14.3553	14.25	14.7296	48.524	43.3349	3	3	0
ENSMUSG00000000346	14820	ENSMUST00000000356	Dazap2	protein_coding	cds	CCT	GGG	chr15	+	414	17	-151	100618122	100618124	17.44	12.1008	39.0898	11.2698	16.8795	26.4348	68.6306	54.5841	3	3	0
ENSMUSG00000000563	25774	ENSMUST00000118209	Atp5pb	protein_coding	cds	GAT	GTG	chr3	-	1046	167	-89	105951603	105951601	12.1781	13.6932	21.178	15.7655	20.6349	18.9005	47.0492	55.301	3	3	0
ENSMUSG00000000563	25779	ENSMUST00000133320	Atp5pb	nonsense_mediated_decay	3utr	NA	NA	chr3	-	617	527	348	105954044	105954042	33.1268	27.1058	45.5896	30.3992	45.4952	45.7125	105.822	121.607	3	3	0
ENSMUSG00000000563	25780	ENSMUST00000118209, ENSMUST00000133320	Atp5pb	protein_coding, nonsense_mediated_decay	cds, 3utr	GGA, NA	GAA, NA	chr3	-	760.5	323	105.5	105954045	105954043	28.1448	36.2122	63.7643	55.7002	55.543	30.3535	128.121	141.597	3	3	0
ENSMUSG00000000563	25785	ENSMUST00000118209, ENSMUST00000133320	Atp5pb	protein_coding, nonsense_mediated_decay	cds, 3utr	GAA, NA	ATA, NA	chr3	-	718.667	205	-25	105954135	105954133	22.6722	18.5692	16.6688	19.5087	21.7146	19.13	57.9102	60.3533	3	3	0
ENSMUSG00000000579	16373	ENSMUST00000092966	Dynlt1c	protein_coding	cds	AAT	GTC	chr17	+	271	44	-69	6606674	6606676	22.6344	10.3393	27.007	17.5641	20.4235	22.0963	59.9807	60.0839	3	3	0
ENSMUSG00000000740	39068	ENSMUST00000000756	Rpl13	protein_coding	cds	GGC	ATC	chr8	+	384	94	-117	123103218	123103220	19.02	19.6505	27.5382	21.5296	24.7917	21.3688	66.2087	67.69	3	3	0
ENSMUSG00000000861	4937	ENSMUST00000118955, ENSMUST00000109516	Bcl11a	protein_coding	cds	CAG	CCA	chr11	+	672.5	150	-67	24163186	24163188	26.9919	18.6961	44.904	18.1918	28.9324	25.7461	90.5921	72.8703	3	3	0
ENSMUSG00000000881	43115	ENSMUST00000000901, ENSMUST00000113736, ENSMUST00000087984	Dlg3	protein_coding	cds	GGC	ATC	chrX	+	850.667	169.5	-663.667	100772122	100772124	26.9322	11.3137	14.6059	12.4502	16.0997	25.9238	52.8519	54.4736	3	3	0
ENSMUSG00000000948	35473	ENSMUST00000179360	Gm38393	nonsense_mediated_decay	cds	GTG	GAT	chr7	-	171	52	-19	59995509	59995507	18.4534	11.1922	17.1857	10.8594	14.8191	11.7588	46.8312	37.4372	3	3	0
ENSMUSG00000001127	42578	ENSMUST00000136451, ENSMUST00000001155, ENSMUST00000122850, ENSMUST00000122312, ENSMUST00000120356	Araf	nonsense_mediated_decay, protein_coding	cds	AAT	GAG	chrX	+	912.8	183.4	-141.4	20851999	20852001	11.288	12.4041	22.7742	20.7849	18.0102	14.1824	46.4663	52.9775	3	3	0
ENSMUSG00000001175	9276	ENSMUST00000110082	Calm1	protein_coding	cds	GAT	GGT	chr12	+	345	22	-127	100203606	100203608	23.8583	26.0698	24.7701	40.0624	42.8279	17.1715	74.6982	100.062	3	3	0
ENSMUSG00000001175	9289	ENSMUST00000001204, ENSMUST00000110082	Calm1	protein_coding	cds	GGC	AAT	chr12	+	396	41	-90	100203717	100205613	23.4949	10.1009	14.4163	11.0579	15.3917	23.3946	48.0121	49.8441	3	3	0
ENSMUSG00000001175	9297	ENSMUST00000110082, ENSMUST00000001204	Calm1	protein_coding	cds	GAT	GGG	chr12	+	504	77	-54	100205719	100206099	59.0359	55.484	109.75	92.6929	104.115	52.0503	224.27	248.858	3	3	0
ENSMUSG00000001270	9539	ENSMUST00000001304	Ckb	protein_coding	cds	GCA	ATC	chr12	-	1237	371	-10	111669596	111669594	33.6314	21.6667	43.973	27.0006	36.3131	28.6984	99.2711	92.0122	3	3	0
ENSMUSG00000001270	9540	ENSMUST00000001304	Ckb	protein_coding	cds	CAG	GCA	chr12	-	1234	370	-11	111669599	111669597	12.2224	13.5275	18.4216	18.651	18.45	10.0427	44.1715	47.1437	3	3	0
ENSMUSG00000001270	9547	ENSMUST00000001304	Ckb	protein_coding	cds	CTG	CCC	chr12	-	1018	298	-83	111669898	111669896	20.4426	18.4182	25.4619	18.8862	22.5962	14.5868	64.3227	56.0692	3	3	0
ENSMUSG00000001270	9551	ENSMUST00000001304	Ckb	protein_coding	cds	TGC	CCA	chr12	-	970	282	-99	111669946	111669944	49.8468	61.8812	121.306	78.2013	89.3998	29.2515	233.034	196.853	3	3	0
ENSMUSG00000001270	9554	ENSMUST00000001304	Ckb	protein_coding	cds	GAA	ACT	chr12	-	904	260	-121	111670012	111670010	12.7967	11.5292	23.5867	16.6014	21.795	14.2861	47.9126	52.6825	3	3	0
ENSMUSG00000001270	9556	ENSMUST00000001304	Ckb	protein_coding	cds	CAG	ATC	chr12	-	898	258	-123	111670165	111670163	19.4485	25.2718	47.0887	20.2418	21.7778	27.866	91.809	69.8856	3	3	0
ENSMUSG00000001270	9564	ENSMUST00000001304	Ckb	protein_coding	cds	GAT	AAG	chr12	-	706	194	-187	111670944	111670942	21.1927	22.523	40.3922	29.8421	39.0233	41.1538	84.1078	110.019	3	3	0
ENSMUSG00000001270	9567	ENSMUST00000001304	Ckb	protein_coding	cds	AGC	ATG	chr12	-	655	177	-204	111670995	111670993	24.8522	12.0457	13.9278	14.9432	19.2567	15.2143	50.8257	49.4142	3	3	0
ENSMUSG00000001270	9573	ENSMUST00000001304	Ckb	protein_coding	cds	GGG	GAG	chr12	-	568	148	-233	111671252	111671250	104.513	71.2557	168.15	95.0887	124.392	125.161	343.919	344.642	3	3	0
ENSMUSG00000001270	9574	ENSMUST00000001304	Ckb	protein_coding	cds	AGC	ATC	chr12	-	529	135	-246	111671291	111671289	28.6303	15.2799	23.6945	27.1056	36.4226	11.7842	67.6047	75.3124	3	3	0
ENSMUSG00000001270	9575	ENSMUST00000001304	Ckb	protein_coding	cds	AGC	TCG	chr12	-	505	127	-254	111671315	111671313	37.4636	11.3256	39.101	23.6115	25.3722	34.8506	87.8903	83.8343	3	3	0
ENSMUSG00000001270	9580	ENSMUST00000001304	Ckb	protein_coding	cds	AAC	CCA	chr12	-	454	110	-271	111671443	111671441	10.2555	14.1365	20.3076	15.2535	20.1166	16.1763	44.6996	51.5464	3	3	0
ENSMUSG00000001289	14867	ENSMUST00000062492, ENSMUST00000165671, ENSMUST00000165717, ENSMUST00000166658	Pfdn5	protein_coding	5utr, cds	NA, GTC	NA, CCA	chr15	+	242.5	1.5	-219.25	102326831	102326833	21.9027	11.6824	18.9797	15.4563	17.5954	29.4707	52.5648	62.5224	3	3	0
ENSMUSG00000001334	27780	ENSMUST00000102600	Fndc5	protein_coding	cds	TAT	GAT	chr4	+	596	172	-37	129142087	129142089	21.604	16.8855	35.3333	17.6661	21.7898	26.0709	73.8228	65.5269	3	3	0
ENSMUSG00000001366	40802	ENSMUST00000085311, ENSMUST00000159099, ENSMUST00000162625	Fbxo9	protein_coding	5utr	NA	NA	chr9	-	208.667	-115	-814.333	78108408	78108406	49.4226	41.4579	59.8887	34.8925	49.0906	56.1664	150.769	140.149	3	3	0
ENSMUSG00000001366	40803	ENSMUST00000085311, ENSMUST00000159099, ENSMUST00000162625	Fbxo9	protein_coding	5utr	NA	NA	chr9	-	207.667	-116	-815.333	78108409	78108407	15.7313	12.415	19.2302	38.7906	30.3113	13.3609	47.3765	82.4628	3	3	0
ENSMUSG00000001366	40805	ENSMUST00000085311, ENSMUST00000159099, ENSMUST00000162625	Fbxo9	protein_coding	5utr	NA	NA	chr9	-	150.667	-173	-872.333	78108466	78108464	44.1915	23.4961	37.1705	18.8485	29.598	29.1433	104.858	77.5898	3	3	0
ENSMUSG00000001419	25048	ENSMUST00000001455, ENSMUST00000119251, ENSMUST00000107558, ENSMUST00000107559	Mef2d	protein_coding	5utr	NA	NA	chr3	+	220	-104	-1630.75	88155705	88155707	24.2715	19.2406	54.0788	54.7854	42.749	25.9379	97.591	123.472	3	3	0
ENSMUSG00000001419	25049	ENSMUST00000001455, ENSMUST00000119251, ENSMUST00000107558, ENSMUST00000107559	Mef2d	protein_coding	5utr	NA	NA	chr3	+	221	-103	-1629.75	88155706	88155708	59.4884	16.4818	31.3301	16.153	26.2434	70.3916	107.3	112.788	3	3	0
ENSMUSG00000001472	39097	ENSMUST00000108840	Tcf25	protein_coding	cds	GAT	TAT	chr8	+	1049	333	-293	123391663	123391665	11.6499	10.8367	19.1266	16.6712	10.8428	15.4563	41.6133	42.9703	3	3	0
ENSMUSG00000001473	19200	ENSMUST00000001513	Tubb6	protein_coding	cds	AAC	ACC	chr18	+	533	164	-283	67401524	67401526	148.28	59.3764	148.208	74.7354	67.4222	201.642	355.864	343.799	3	3	0
ENSMUSG00000001473	19202	ENSMUST00000001513	Tubb6	protein_coding	cds	ATC	GAC	chr18	+	644	201	-246	67401635	67401637	52.9788	11.6194	22.8006	11.3823	13.121	41.8567	87.3988	66.36	3	3	0
ENSMUSG00000001473	19211	ENSMUST00000001513	Tubb6	protein_coding	cds	GAC	GAG	chr18	+	1250	403	-44	67402241	67402243	23.733	11.6194	21.7892	23.0186	19.9698	12.8049	57.1416	55.7933	3	3	0
ENSMUSG00000001473	19212	ENSMUST00000001513	Tubb6	protein_coding	cds	GAG	ATG	chr18	+	1253	404	-43	67402244	67402246	37.5588	32.2711	21.8861	30.6214	51.9488	44.4431	91.7161	127.013	3	3	0
ENSMUSG00000001473	19213	ENSMUST00000001513	Tubb6	protein_coding	cds	TCC	GAG	chr18	+	1298	419	-28	67402289	67402291	27.9359	13.4912	13.6507	18.9765	28.9487	21.0946	55.0778	69.0198	3	3	0
ENSMUSG00000001473	19214	ENSMUST00000001513	Tubb6	protein_coding	cds	GAG	TAC	chr18	+	1301	420	-27	67402292	67402294	19.6918	18.3303	22.0707	19.0252	21.5333	14.1873	60.0929	54.7458	3	3	0
ENSMUSG00000001506	6966	ENSMUST00000001547	Col1a1	protein_coding	5utr	NA	NA	chr11	+	86	-60	-4421	94936309	94936311	34.0419	18.4331	71.2479	37.4009	35.3543	28.5892	123.723	101.344	3	3	0
ENSMUSG00000001506	6968	ENSMUST00000001547	Col1a1	protein_coding	5utr	NA	NA	chr11	+	129	-17	-4378	94936352	94936354	17.7791	11.684	80.6436	23.9141	17.6883	13.1002	110.107	54.7026	3	3	0
ENSMUSG00000001525	17427	ENSMUST00000001566	Tubb5	protein_coding	cds	GGA	GAC	chr17	-	919	222	-222	35835651	35835649	31.2458	14.8774	43.5842	19.2149	22.2522	17.4725	89.7074	58.9396	3	3	0
ENSMUSG00000001525	17443	ENSMUST00000001566, ENSMUST00000134978	Tubb5	protein_coding	5utr	NA	NA	chr17	-	165	-243.5	-1010	35838093	35838091	69.5171	22.0255	24.3912	19.5569	20.6004	80.1287	115.934	120.286	3	3	0
ENSMUSG00000001525	17444	ENSMUST00000001566, ENSMUST00000134978	Tubb5	protein_coding	5utr	NA	NA	chr17	-	164	-244.5	-1011	35838094	35838092	42.7402	49.1554	71.7933	54.6527	63.5417	20.0718	163.689	138.266	3	3	0
ENSMUSG00000001525	17447	ENSMUST00000001566, ENSMUST00000134978	Tubb5	protein_coding	5utr	NA	NA	chr17	-	100	-308.5	-1075	35838158	35838156	19.6196	29.1746	48.9058	13.5906	11.7027	11.387	97.7	36.6803	3	3	0
ENSMUSG00000001666	3099	ENSMUST00000172820, ENSMUST00000001716	Ddt	protein_coding	cds	GCG	GAG	chr10	-	262	47	-48	75772812	75772810	17.8223	17.5362	11.6256	15.6026	21.2604	16.3022	46.9841	53.1652	3	3	0
ENSMUSG00000001924	42534	ENSMUST00000089217, ENSMUST00000001989	Uba1	protein_coding	cds	ATG	GCG	chrX	+	334.5	40	-1018	20668694	20668696	19.9488	27.1956	33.4334	18.3035	24.466	22.6783	80.5778	65.4479	3	3	0
ENSMUSG00000001924	42539	ENSMUST00000001989, ENSMUST00000089217	Uba1	protein_coding	cds	GGT	CCT	chrX	+	1024.5	270	-788	20670872	20671356	11.8332	17.8876	12.8153	10.6668	10.9451	10.0012	42.5361	31.6131	3	3	0
ENSMUSG00000001924	42549	ENSMUST00000089217, ENSMUST00000001989	Uba1	protein_coding	cds	GGG	AAG	chrX	+	2875.5	887	-171	20681337	20681339	14.7986	11.8034	19.4538	13.8927	17.5757	18.5517	46.0558	50.02	3	3	0
ENSMUSG00000001964	42895	ENSMUST00000002029, ENSMUST00000096424, ENSMUST00000119197, ENSMUST00000088313	Emd	protein_coding	cds	GGG	GAG	chrX	+	473.25	97	-105.5	74255792	74255794	14.4298	11.0142	21.1443	20.1831	18.7967	14.048	46.5883	53.0278	3	3	0
ENSMUSG00000001964	42905	ENSMUST00000088313	Emd	protein_coding	3utr	NA	NA	chrX	+	979	856	380	74261189	74261191	52.4545	58.3686	76.9322	37.9762	66.8599	20.6458	187.755	125.482	3	3	0
ENSMUSG00000001964	42906	ENSMUST00000088313	Emd	protein_coding	3utr	NA	NA	chrX	+	980	857	381	74261190	74261192	112.21	81.5281	115.402	47.652	76.5856	150.241	309.141	274.478	3	3	0
ENSMUSG00000001964	42912	ENSMUST00000088313	Emd	protein_coding	3utr	NA	NA	chrX	+	1061	938	462	74261271	74261273	53.1045	23.5865	31.6615	17.4267	25.9762	26.9585	108.352	70.3615	3	3	0
ENSMUSG00000001964	42918	ENSMUST00000088313	Emd	protein_coding	3utr	NA	NA	chrX	+	1268	1145	669	74261478	74261480	43.9557	52.4631	31.8723	51.5	76.0708	81.5283	128.291	209.099	3	3	0
ENSMUSG00000001986	42677	ENSMUST00000115103, ENSMUST00000076349, ENSMUST00000139965, ENSMUST00000165288	Gria3	protein_coding, nonsense_mediated_decay	cds	TAT	GGA	chrX	+	1243	368	-502.5	41595723	41595725	10.3341	11.547	11.3137	14.2479	16.5404	12.0748	33.1948	42.8631	3	3	0
ENSMUSG00000001986	42681	ENSMUST00000115103, ENSMUST00000076349, ENSMUST00000139965, ENSMUST00000165288	Gria3	protein_coding, nonsense_mediated_decay	cds	GAT	CCT	chrX	+	1765	542	-328.5	41610057	41610059	21.8668	14.6442	28.276	12.3213	17.2081	25.2256	64.787	54.7549	3	3	0
ENSMUSG00000001995	39187	ENSMUST00000108775	Sipa1l2	protein_coding	cds	CGG	GAC	chr8	-	2445	777	-945	125468667	125468665	60.1333	21.9474	62.8828	25.8199	46.4067	45.5573	144.964	117.784	3	3	0
ENSMUSG00000002010	42855	ENSMUST00000052761	Idh3g	protein_coding	cds	GAC	ATC	chrX	-	1173	377	-16	73779121	73779119	11.2348	13.7001	60.3971	18.5733	16.1467	21.5745	85.332	56.2945	3	3	0
ENSMUSG00000002014	42862	ENSMUST00000002090, ENSMUST00000166518	Ssr4	protein_coding	cds	AAT	GGG	chrX	+	619.5	141	-31	73790662	73790664	17.2735	11.8914	20.5516	13.6224	18.4861	13.6613	49.7165	45.7699	3	3	0
ENSMUSG00000002129	4577	ENSMUST00000002198	Sf3a1	protein_coding	cds	CAG	CCA	chr11	+	198	20	-771	4160547	4160549	26.5961	17.818	29.3036	22.5167	26.6534	23.4339	73.7176	72.604	3	3	0
ENSMUSG00000002332	12326	ENSMUST00000002403	Dhrs1	protein_coding	5utr	NA	NA	chr14	-	205	-67	-1008	55745486	55745484	28.8095	13.6622	53.0037	15.8938	19.7348	14.9334	95.4754	50.562	3	3	0
ENSMUSG00000002416	31884	ENSMUST00000135671, ENSMUST00000119379	Ndufb2	protein_coding	cds	GTA	CCT	chr6	+	57.5	7	-98	39592635	39592637	16.7851	25.6042	26.4707	33.066	44.1827	23.9389	68.86	101.188	3	3	0
ENSMUSG00000002416	31888	ENSMUST00000135671, ENSMUST00000119379	Ndufb2	protein_coding	cds	GGT	GAG	chr6	+	207.5	57	-48	39596523	39596525	20.6215	14.1513	47.3587	17.6678	23.7221	11.3044	82.1315	52.6944	3	3	0
ENSMUSG00000002489	16122	ENSMUST00000163370, ENSMUST00000002588	Tiam1	protein_coding	5utr	NA	NA	chr16	-	259.5	-227	-5002	89955982	89955980	40.6667	25.6667	43.7289	28.4575	18.1217	47.1763	110.062	93.7555	3	3	0
ENSMUSG00000002489	16123	ENSMUST00000163370, ENSMUST00000002588	Tiam1	protein_coding	5utr	NA	NA	chr16	-	258.5	-228	-5003	89955983	89955981	21.4005	29.1562	93.5375	29.1851	32.0444	17.2923	144.094	78.5218	3	3	0
ENSMUSG00000002489	16125	ENSMUST00000114124	Tiam1	protein_coding	5utr	NA	NA	chr16	-	263	-227	-2929	89960681	89960679	40.6667	25.6667	43.7289	28.4575	18.1217	47.1763	110.062	93.7555	3	3	0
ENSMUSG00000002489	16126	ENSMUST00000114124	Tiam1	protein_coding	5utr	NA	NA	chr16	-	262	-228	-2930	89960682	89960680	21.5078	29.1562	94.6235	29.1851	32.0444	17.2923	145.287	78.5218	3	3	0
ENSMUSG00000002580	7196	ENSMUST00000002655	Mien1	protein_coding	cds	GGA	GAA	chr11	-	339	98	-17	98438116	98438114	17.8145	13.6386	10.7212	11.5473	14.4583	22.7101	42.1744	48.7157	3	3	0
ENSMUSG00000002812	5766	ENSMUST00000002889	Flii	protein_coding	cds	AAT	GAG	chr11	-	3590	1171.5	-99	60715130	60715128	11.8392	10.6534	16.2635	16.9702	12.9966	17.3553	38.7561	47.3221	3	3	0
ENSMUSG00000002930	32078	ENSMUST00000052827	Ppp1r17	protein_coding	cds	GGT	GTG	chr6	+	390	82	-77	56026467	56026469	10.0881	10.7985	12.591	11.5005	11.2223	12.1622	33.4775	34.885	3	3	0
ENSMUSG00000002957	36866	ENSMUST00000003038	Ap2a2	protein_coding	cds	CGT	GAG	chr7	+	607	140	-798	141598849	141598851	24.2538	28.9117	26.6031	26.8561	35.8203	21.7384	79.7685	84.4148	3	3	0
ENSMUSG00000002957	36870	ENSMUST00000003038	Ap2a2	protein_coding	cds	GGA	CTT	chr7	+	2359	724	-214	141626166	141626168	21.1517	18.2464	36.3156	22.1511	26.1854	22.8353	75.7137	71.1719	3	3	0
ENSMUSG00000002985	34184	ENSMUST00000174064	Apoe	protein_coding	cds	GAG	AAT	chr7	-	1125	308	-3	19696370	19696368	44.0316	29.6439	84.0954	31.4946	26.8263	51.1638	157.771	109.485	3	3	0
ENSMUSG00000002985	34185	ENSMUST00000173739, ENSMUST00000174355, ENSMUST00000003066	Apoe	protein_coding	cds	GAG	AAT	chr7	-	1031	308	-3	19696392	19696390	43.9725	29.5998	84.0954	31.5208	26.9452	51.1638	157.668	109.63	3	3	0
ENSMUSG00000002985	34200	ENSMUST00000174064	Apoe	protein_coding	cds	GCG	GAG	chr7	-	990	263	-48	19696505	19696503	25.4018	16.2511	17.2281	20.9653	28.5562	21.2182	58.881	70.7397	3	3	0
ENSMUSG00000002985	34205	ENSMUST00000173739, ENSMUST00000174355, ENSMUST00000003066	Apoe	protein_coding	cds	GCG	GAG	chr7	-	896	263	-48	19696527	19696525	25.4018	16.2511	17.2281	20.9653	28.5562	21.2182	58.881	70.7397	3	3	0
ENSMUSG00000002985	34218	ENSMUST00000174064	Apoe	protein_coding	cds	CGC	ATC	chr7	-	867	222	-89	19696628	19696626	10.5074	18.3675	10.4397	16.8024	21.622	14.6187	39.3146	53.0431	3	3	0
ENSMUSG00000002985	34221	ENSMUST00000174355, ENSMUST00000003066, ENSMUST00000174144, ENSMUST00000173739, ENSMUST00000172983	Apoe	protein_coding	cds	CGC	ATC	chr7	-	778.6	222	-57	19696650	19696648	10.6365	18.501	10.2469	16.2603	20.8157	15.2424	39.3844	52.3184	3	3	0
ENSMUSG00000002985	34246	ENSMUST00000173739, ENSMUST00000174355, ENSMUST00000003066, ENSMUST00000172983, ENSMUST00000174144, ENSMUST00000172808	Apoe	protein_coding	cds	CGC	AAG	chr7	-	544.167	149.167	-107.5	19696863	19696861	20.4356	12.1167	48.395	13.4459	14.3064	21.8455	80.9473	49.5978	3	3	0
ENSMUSG00000003068	3437	ENSMUST00000144883, ENSMUST00000003152, ENSMUST00000105370	Stk11	nonsense_mediated_decay, protein_coding	cds	AAG	AAA	chr10	+	1383.33	268	-118	80127913	80127915	55.3333	20.2954	53.4178	21.2592	35.4194	28.4535	129.046	85.1321	3	3	0
ENSMUSG00000003072	3447	ENSMUST00000105367, ENSMUST00000105366, ENSMUST00000003156	Atp5d	protein_coding	cds	GCG	CGT	chr10	+	348	18	-134.333	80142519	80142521	13.6442	11.882	13.9168	10.8623	13.9375	11.8693	39.4429	36.669	3	3	0
ENSMUSG00000003072	3451	ENSMUST00000105366, ENSMUST00000105367, ENSMUST00000003156	Atp5d	protein_coding	cds	GTC	AAG	chr10	+	456	54	-98.3333	80143852	80143854	10.2553	24.0333	11.9594	15.9732	22.3467	13.6598	46.248	51.9797	3	3	0
ENSMUSG00000003269	35329	ENSMUST00000107729, ENSMUST00000056820	Cyth2	protein_coding	cds	AAT	CCC	chr7	-	797.5	200	-199.5	45810667	45810665	14.4929	14.1594	44.7606	20.0838	14.0337	26.99	73.4129	61.1075	3	3	0
ENSMUSG00000003269	35331	ENSMUST00000107729, ENSMUST00000056820	Cyth2	protein_coding	cds	CCA	GAC	chr7	-	221.5	8	-391.5	45813152	45813150	43.8129	15.3344	60.7952	15.4416	20.1896	51.4512	119.942	87.0824	3	3	0
ENSMUSG00000003316	38862	ENSMUST00000169020, ENSMUST00000168741, ENSMUST00000003404	Glg1	protein_coding	cds	GCA	GAC	chr8	-	2580.33	855.667	-120.667	111160712	111160710	12.1301	13.0351	15.8018	13.0206	19.9693	11.5176	40.9669	44.5075	3	3	0
ENSMUSG00000003380	34365	ENSMUST00000076961	Rabac1	protein_coding	cds	CAA	CGT	chr7	-	325	51	-134	24972192	24972190	34.6758	25.7849	65.5365	29.0456	46.796	55.0695	125.997	130.911	3	3	0
ENSMUSG00000003410	39421	ENSMUST00000003501	Elavl3	protein_coding	cds	GGA	CCC	chr9	-	1324	304	-63	22018708	22018706	29.9654	37.2615	42.0311	33.6191	42.3676	52.0002	109.258	127.987	3	3	0
ENSMUSG00000003429	35263	ENSMUST00000003521	Rps11	protein_coding	cds	CAG	CCT	chr7	-	164	12	-146	45123480	45123478	48.1543	36.9205	54.4244	34.497	48.8021	51.5018	139.499	134.801	3	3	0
ENSMUSG00000003438	34714	ENSMUST00000081946	Timm50	protein_coding	cds	GGG	ACT	chr7	-	271	77	-276	28310897	28310895	27.1227	14.4918	36.3242	13.4939	12.2812	25.8295	77.9386	51.6046	3	3	0
ENSMUSG00000003469	12625	ENSMUST00000003561	Phyhip	protein_coding	5utr	NA	NA	chr14	+	161	-188	-1180	70457636	70457638	44.2648	22.1778	31.1945	25.0851	37.374	41.4231	97.637	103.882	3	3	0
ENSMUSG00000003573	37764	ENSMUST00000140212, ENSMUST00000003669, ENSMUST00000110124	Homer3	protein_coding	cds	CGA	GAG	chr8	+	1023.33	278	-80	70291552	70291554	11.0777	21.7411	16.3036	18.612	18.7512	20.1958	49.1225	57.5589	3	3	0
ENSMUSG00000003814	38254	ENSMUST00000003912	Calr	protein_coding	cds	GAT	ATC	chr8	-	613	159	-257	84844886	84844884	24.6252	27.5155	28.8547	36.0542	46.8904	38.3822	80.9954	121.327	3	3	0
ENSMUSG00000004031	1714	ENSMUST00000195271, ENSMUST00000004133	Brinp2	nonsense_mediated_decay, protein_coding	5utr	NA	NA	chr1	-	81.5	-595.5	-2052.5	158356197	158356195	39.9038	62.9312	79.1628	48.2832	94.2011	40.0731	181.998	182.557	3	3	0
ENSMUSG00000004071	14999	ENSMUST00000147225, ENSMUST00000004173, ENSMUST00000118703, ENSMUST00000117713	Cdip1	protein_coding	cds	CAG	CCT	chr16	-	267.5	33.5	-159.25	4769773	4769771	18.1773	24.5557	26.0678	25.2547	22.7273	31.4547	68.8008	79.4368	3	3	0
ENSMUSG00000004151	8547	ENSMUST00000161980, ENSMUST00000160701, ENSMUST00000159334	Etv1	protein_coding	5utr	NA	NA	chr12	+	218.333	-38	-1270	38783704	38783706	11.7211	23.1152	25.9089	27.8862	24.417	28.5435	60.7453	80.8468	3	3	0
ENSMUSG00000004207	2899	ENSMUST00000105465, ENSMUST00000165878, ENSMUST00000179238, ENSMUST00000177779, ENSMUST00000004316	Psap	protein_coding	cds	AGC	AAG	chr10	+	257.4	52.4	-502.6	60291757	60291759	43.3897	28.612	16.9882	34.3	37.1671	44.2701	88.9899	115.737	3	3	0
ENSMUSG00000004207	2901	ENSMUST00000105465, ENSMUST00000165878, ENSMUST00000179238, ENSMUST00000177779, ENSMUST00000004316	Psap	protein_coding	cds	GGG	AAC	chr10	+	317.4	72.4	-482.6	60292549	60292551	12.6216	10.6559	20.9384	15.2001	18.1726	16.3528	44.2159	49.7255	3	3	0
ENSMUSG00000004207	2919	ENSMUST00000179238, ENSMUST00000004316	Psap	protein_coding	cds	GAA	ATC	chr10	+	905.5	263.5	-293	60299106	60299108	13.5202	14.283	14.8596	10.4946	14.9634	14.3325	42.6628	39.7905	3	3	0
ENSMUSG00000004207	2925	ENSMUST00000105465, ENSMUST00000165878, ENSMUST00000179238, ENSMUST00000177779, ENSMUST00000004316	Psap	protein_coding	cds	AAT	AAG	chr10	+	1066.2	322	-233	60299520	60299522	14.4192	17.4126	19.5242	14.8809	17.234	16.3307	51.356	48.4456	3	3	0
ENSMUSG00000004207	2934	ENSMUST00000105465, ENSMUST00000165878, ENSMUST00000179238, ENSMUST00000177779, ENSMUST00000004316	Psap	protein_coding	cds	CAG	AAG	chr10	+	1399.2	433	-122	60300161	60300163	14.5697	13.2256	33.6751	12.7374	12.965	19.3544	61.4704	45.0568	3	3	0
ENSMUSG00000004207	2939	ENSMUST00000105465, ENSMUST00000165878, ENSMUST00000179238, ENSMUST00000177779, ENSMUST00000004316	Psap	protein_coding	cds	AAG	GAG	chr10	+	1477.2	459	-96	60300239	60300241	17.8099	12.9558	26.2698	16.2221	16.8159	10.7392	57.0355	43.7771	3	3	0
ENSMUSG00000004207	2940	ENSMUST00000105465, ENSMUST00000165878, ENSMUST00000179238, ENSMUST00000177779, ENSMUST00000004316	Psap	protein_coding	cds	GAG	GAA	chr10	+	1480.2	460	-95	60300242	60300244	18.5783	12.2854	12.8111	11.3951	11.4785	27.4158	43.6748	50.2894	3	3	0
ENSMUSG00000004207	2942	ENSMUST00000105465, ENSMUST00000165878, ENSMUST00000179238, ENSMUST00000177779, ENSMUST00000004316	Psap	protein_coding	cds	CCA	GAC	chr10	+	1522.2	474	-81	60300284	60300286	17.9093	18.3906	39.7794	18.7051	21.3924	15.0803	76.0793	55.1778	3	3	0
ENSMUSG00000004207	2943	ENSMUST00000105465, ENSMUST00000165878, ENSMUST00000179238, ENSMUST00000177779, ENSMUST00000004316	Psap	protein_coding	cds	GTG	GAA	chr10	+	1591.2	497	-58	60300585	60300587	19.0011	12.4698	21.0965	18.2588	14.2549	19.1833	52.5674	51.697	3	3	0
ENSMUSG00000004285	31694	ENSMUST00000004396, ENSMUST00000149646	Atp6v1f	protein_coding	cds	GAT	GAC	chr6	+	324.5	34	-61	29470082	29470084	25.9792	25.0324	46.8015	24.6361	35.2618	46.1303	97.813	106.028	3	3	0
ENSMUSG00000004285	31695	ENSMUST00000143101	Atp6v1f	protein_coding	cds	ATG	ACA	chr6	+	117	39	-61	29470083	29470085	27.7844	32.9649	58.3493	32.3143	46.3003	50.1241	119.099	128.739	3	3	0
ENSMUSG00000004319	37601	ENSMUST00000056508, ENSMUST00000110302	Clcn3	protein_coding	cds	GGA	GGA	chr8	-	408.5	13	-802	60954583	60954581	20.7023	14.877	30.0511	10.3696	15.0153	29.0579	65.6304	54.4429	3	3	0
ENSMUSG00000004319	37606	ENSMUST00000004430, ENSMUST00000093490, ENSMUST00000110301	Clcn3	protein_coding	5utr	NA	NA	chr8	-	422.333	-78.3333	-2524.33	60982838	60982836	12.4908	15.6733	10.0101	11.3636	15.4535	13.663	38.1742	40.4801	3	3	0
ENSMUSG00000004319	37609	ENSMUST00000004430, ENSMUST00000093490, ENSMUST00000110301	Clcn3	protein_coding	5utr	NA	NA	chr8	-	117.333	-383.333	-2829.33	60983143	60983141	11.0355	13.6173	10.5105	23.6309	17.8855	11.4515	35.1633	52.9678	3	3	0
ENSMUSG00000004383	37999	ENSMUST00000004497	Large1	protein_coding	5utr	NA	NA	chr8	-	75	-99	-2369	73352482	73352480	22.7117	18.6506	18.4661	24.0985	19.439	23.5248	59.8284	67.0623	3	3	0
ENSMUSG00000004383	38004	ENSMUST00000119826	Large1	protein_coding	5utr	NA	NA	chr8	-	258	-894	-3164	73353283	73353281	22.7117	10.5654	11.1543	12.554	11.4229	21.1779	44.4314	45.1548	3	3	0
ENSMUSG00000004535	32032	ENSMUST00000080723, ENSMUST00000149588, ENSMUST00000138040, ENSMUST00000129660	Tax1bp1	protein_coding	cds	CGT	GAC	chr6	+	381.5	59.5	-248.375	52727216	52727218	16.6856	13.771	22.0344	15.622	27.604	23.5035	52.4909	66.7295	3	3	0
ENSMUSG00000004558	12158	ENSMUST00000111632	Ndrg2	protein_coding	cds	GGT	ATC	chr14	-	784	204	-153	51908130	51908128	18.5119	15.0393	37.9256	13.2979	13.403	24.455	71.4768	51.1558	3	3	0
ENSMUSG00000004558	12161	ENSMUST00000004673	Ndrg2	protein_coding	cds	GGT	ATC	chr14	-	768	218	-153	51908346	51908344	18.5119	15.8644	37.9256	13.8728	14.2112	24.455	72.3019	52.539	3	3	0
ENSMUSG00000004558	12175	ENSMUST00000111632	Ndrg2	protein_coding	cds	TAT	AAG	chr14	-	352	60	-297	51910435	51910680	32.208	20.4144	40.7607	21.131	24.3359	42.5241	93.3831	87.9909	3	3	0
ENSMUSG00000004558	12177	ENSMUST00000004673	Ndrg2	protein_coding	cds	TAT	AAG	chr14	-	336	74	-297	51910739	51910737	30.8649	20.673	39.4091	21.2603	27.0761	45.7345	90.947	94.0708	3	3	0
ENSMUSG00000004630	37050	ENSMUST00000144977, ENSMUST00000128566	Pcp2	protein_coding	3utr	NA	NA	chr8	-	926	910	581	3623443	3623441	25.2005	12.6875	24.6015	10.2404	27.2982	62.8163	62.4896	100.355	3	3	0
ENSMUSG00000004630	37051	ENSMUST00000128566, ENSMUST00000144977	Pcp2	protein_coding	3utr	NA	NA	chr8	-	925	909	580	3623444	3623442	35.656	20.0946	44.0903	33.1114	54.5729	60.4795	99.8409	148.164	3	3	0
ENSMUSG00000004630	37067	ENSMUST00000128566, ENSMUST00000144977, ENSMUST00000136105, ENSMUST00000142431, ENSMUST00000133459, ENSMUST00000004749	Pcp2	protein_coding	cds	GTT	AAT	chr8	-	272.833	69	-43	3624547	3624545	12.8903	14.2698	16.9199	13.9496	18.1559	11.7922	44.0799	43.8977	3	3	0
ENSMUSG00000004630	37075	ENSMUST00000136105, ENSMUST00000142431, ENSMUST00000133459, ENSMUST00000004749, ENSMUST00000128566, ENSMUST00000144977	Pcp2	protein_coding	cds	GGC	CAG	chr8	-	167.833	34	-78	3624805	3624803	25.3194	13.0793	29.2214	10.8672	17.9956	24.7192	67.62	53.582	3	3	0
ENSMUSG00000004633	32043	ENSMUST00000046856, ENSMUST00000133315	Chn2	protein_coding, nonsense_mediated_decay	5utr	NA	NA	chr6	+	418	-97	-888	54040010	54040012	10.6537	19.0792	16.4874	32.1883	35.2084	19.1722	46.2203	86.5689	3	3	0
ENSMUSG00000004789	9115	ENSMUST00000053811	Dlst	protein_coding	cds	GGA	GGA	chr12	+	1186	374	-80	85130956	85130958	19.5298	13.63	31.7025	24.2422	20.5422	27.0638	64.8623	71.8482	3	3	0
ENSMUSG00000004895	25027	ENSMUST00000005015	Prcc	protein_coding	5utr	NA	NA	chr3	-	110	-157	-1632	87885499	87885497	46.0844	21.0283	33.5283	18.1489	41.9232	30.5087	100.641	90.5809	3	3	0
ENSMUSG00000004902	33059	ENSMUST00000112682	Slc25a18	protein_coding	5utr	NA	NA	chr6	+	178	-78	-1040	120786111	120786113	17.6144	14.0984	52.1208	11.388	16.7149	10.0458	83.8336	38.1486	3	3	0
ENSMUSG00000004936	40514	ENSMUST00000005066	Map2k1	protein_coding	cds	GGG	GAG	chr9	-	942	201	-192	64193792	64193790	13.3246	10.4931	11.8695	30.4522	31.9073	12.6437	35.6871	75.0032	3	3	0
ENSMUSG00000004980	31994	ENSMUST00000090002, ENSMUST00000069949	Hnrnpa2b1	protein_coding	cds	AAT	GAT	chr6	-	997.5	268	-53	51464189	51464187	21.2805	11.4344	22.2943	21.3138	21.9256	18.6657	55.0093	61.9051	3	3	0
ENSMUSG00000004980	31995	ENSMUST00000114459	Hnrnpa2b1	protein_coding	cds	AAT	GAT	chr6	-	1050	300	-53	51464437	51464435	22.2524	14.286	20.8484	20.9631	25.4202	18.7008	57.3868	65.0841	3	3	0
ENSMUSG00000005103	29284	ENSMUST00000005234	Wdr1	protein_coding	cds	GGT	GAG	chr5	-	692	138.5	-467	38540878	38545674	14.5173	10.5667	13.8564	10.0722	17.5401	14.8829	38.9404	42.4952	3	3	0
ENSMUSG00000005161	38275	ENSMUST00000109734, ENSMUST00000109733, ENSMUST00000125893, ENSMUST00000164807, ENSMUST00000005292	Prdx2	protein_coding	cds	GGA	AAG	chr8	+	234.4	8	-179.6	84970265	84970267	41.3672	23.9287	41.5908	26.6859	45.4143	44.5093	106.887	116.609	3	3	0
ENSMUSG00000005161	38278	ENSMUST00000109734, ENSMUST00000005292, ENSMUST00000109733, ENSMUST00000125893, ENSMUST00000164807	Prdx2	protein_coding	cds	TTC	ACT	chr8	+	348.4	46	-141.6	84970470	84970472	16.1916	12.5651	30.123	10.6367	13.6812	19.1987	58.8797	43.5165	3	3	0
ENSMUSG00000005161	38280	ENSMUST00000109734, ENSMUST00000005292, ENSMUST00000109733, ENSMUST00000125893, ENSMUST00000164807	Prdx2	protein_coding	cds	GCT	GAG	chr8	+	393.4	61	-126.6	84970515	84970517	11.1373	12.5859	19.7884	11.2221	17.1201	20.4745	43.5116	48.8167	3	3	0
ENSMUSG00000005161	38286	ENSMUST00000109734, ENSMUST00000005292, ENSMUST00000109733, ENSMUST00000125893, ENSMUST00000164807	Prdx2	protein_coding	cds	GGT	GTC	chr8	+	615.4	135	-52.6	84971586	84971588	30.3417	13.2892	29.4319	12.0242	21.3698	22.1243	73.0628	55.5183	3	3	0
ENSMUSG00000005161	38288	ENSMUST00000109734, ENSMUST00000005292, ENSMUST00000109733, ENSMUST00000164807	Prdx2	protein_coding	cds	GGG	GAA	chr8	+	670.75	168	-30	84971685	84971687	18.8085	11.4184	14.7592	13.1057	17.0469	17.8697	44.9862	48.0223	3	3	0
ENSMUSG00000005161	38289	ENSMUST00000109734, ENSMUST00000005292, ENSMUST00000109733, ENSMUST00000164807	Prdx2	protein_coding	cds	GGC	TGG	chr8	+	688.75	174	-24	84974010	84974012	18.5312	18.3813	18.3469	13.7965	17.5656	11.675	55.2594	43.0371	3	3	0
ENSMUSG00000005312	10917	ENSMUST00000058735	Ubqln1	protein_coding	cds	TAT	AAT	chr13	-	994	258.5	-323	58192143	58192141	16.8344	11.1903	19.8933	16.3823	20.8937	26.1459	47.9179	63.4219	3	3	0
ENSMUSG00000005312	10918	ENSMUST00000076454	Ubqln1	protein_coding	cds	TAT	AAT	chr13	-	960	258.5	-295	58192177	58192175	16.8344	11.1903	19.8933	16.3823	20.8937	25.7452	47.9179	63.0212	3	3	0
ENSMUSG00000005338	2100	ENSMUST00000111220, ENSMUST00000005470	Cadm3	protein_coding	cds	GTG	TTA	chr1	-	925	243	-170	173344327	173344325	24.3702	17.5004	35.9376	14.9142	18.5831	27.6691	77.8082	61.1665	3	3	0
ENSMUSG00000005338	2108	ENSMUST00000111220, ENSMUST00000005470	Cadm3	protein_coding	cds	GGA	ATC	chr1	-	622	142	-271	173345057	173345745	17.3831	18.8088	25.1659	18.3224	24.5495	34.1144	61.3578	76.9863	3	3	0
ENSMUSG00000005354	13806	ENSMUST00000005487, ENSMUST00000109748, ENSMUST00000109747, ENSMUST00000100486	Txn2	protein_coding	cds	GAT	GGA	chr15	-	513.25	65	-85	77927760	77927758	16.6573	14.2933	12.7734	11.0334	12.0844	21.53	43.724	44.6478	3	3	0
ENSMUSG00000005357	3276	ENSMUST00000005490	Slc1a6	protein_coding	cds	ACA	GTC	chr10	+	367	58	-503	78787942	78787944	28.2119	15.3775	17.0798	24.4344	28.7815	28.103	60.6692	81.3189	3	3	0
ENSMUSG00000005357	3301	ENSMUST00000005490	Slc1a6	protein_coding	cds	GGC	ATC	chr10	+	1105	304	-257	78796253	78796255	16.1771	34.4807	20.3028	39.7446	44.4006	44.5155	70.9606	128.661	3	3	0
ENSMUSG00000005357	3303	ENSMUST00000005490	Slc1a6	protein_coding	cds	GGA	AAG	chr10	+	1153	320	-241	78800062	78800064	23.3478	29.0929	18.9724	52.7905	54.5336	34.3605	71.4131	141.685	3	3	0
ENSMUSG00000005357	3306	ENSMUST00000005490	Slc1a6	protein_coding	cds	GGT	ACC	chr10	+	1339	382	-179	78800248	78800250	31.5809	24.2834	34.4587	17.0952	26.8008	46.1551	90.323	90.0512	3	3	0
ENSMUSG00000005360	13130	ENSMUST00000005493, ENSMUST00000157065	Slc1a3	protein_coding	5utr	NA	NA	chr15	-	305.5	-41	-1051	8708783	8708781	49.7488	52.9805	39.8077	53.3046	68.7867	45.9854	142.537	168.077	3	3	0
ENSMUSG00000005360	13133	ENSMUST00000005493, ENSMUST00000157065	Slc1a3	protein_coding	5utr	NA	NA	chr15	-	248.5	-98	-1108	8708839	8710339	64.3008	27.679	54.4165	27.4407	45.5333	20.6595	146.396	93.6335	3	3	0
ENSMUSG00000005378	30875	ENSMUST00000141309	Bud23	protein_coding	5utr	NA	NA	chr5	-	30	-129	-205	135064061	135064059	17.3505	15.722	28.3333	19.2097	23.3643	17.4167	61.4059	59.9907	3	3	0
ENSMUSG00000005610	36090	ENSMUST00000162415, ENSMUST00000161051	Eif4g2	protein_coding	cds	AAG	AGA	chr7	-	973.5	239	-648	111077733	111077731	45.5204	24.7484	68.5301	21.9675	33.2707	50.2609	138.799	105.499	3	3	0
ENSMUSG00000005610	36098	ENSMUST00000162415, ENSMUST00000161051, ENSMUST00000160132, ENSMUST00000159305	Eif4g2	protein_coding	cds	TGG	ATT	chr7	-	403.5	49	-459.75	111080283	111080281	48.5284	23.4504	21.8867	20.7836	23.6091	96.8889	93.8655	141.282	3	3	0
ENSMUSG00000005610	36099	ENSMUST00000162415, ENSMUST00000161051, ENSMUST00000160132, ENSMUST00000159305	Eif4g2	protein_coding	cds	AAA	TGG	chr7	-	400.5	48	-460.75	111080286	111080284	32.7499	94.8397	59.9115	61.5554	73.7021	23.6401	187.501	158.898	3	3	0
ENSMUSG00000005610	36106	ENSMUST00000160132, ENSMUST00000162415	Eif4g2	protein_coding	5utr	NA	NA	chr7	-	94.5	-202	-1803	111082931	111082929	70.6483	33.885	37.4967	14.4591	31.4653	97.064	142.03	142.988	3	3	0
ENSMUSG00000005610	36107	ENSMUST00000162415, ENSMUST00000160132	Eif4g2	protein_coding	5utr	NA	NA	chr7	-	93.5	-203	-1804	111082932	111082930	102.463	97.7488	223.549	85.3828	104.222	156.275	423.762	345.88	3	3	0
ENSMUSG00000005716	13842	ENSMUST00000005860, ENSMUST00000120592	Pvalb	protein_coding	cds	GAA	ACA	chr15	-	324.5	81	-29	78201287	78201285	29.66	34.5149	68.1115	54.5882	76.0743	51.2679	132.286	181.93	3	3	0
ENSMUSG00000005716	13843	ENSMUST00000005860, ENSMUST00000120592	Pvalb	protein_coding	cds	AAA	GAA	chr15	-	321.5	80	-30	78201290	78201288	16.0746	40.5845	43.1189	35.6118	41.599	35.6222	99.7781	112.833	3	3	0
ENSMUSG00000005716	13848	ENSMUST00000005860, ENSMUST00000120592	Pvalb	protein_coding	cds	CAT	ATT	chr15	-	225.5	48	-62	78202571	78202569	22.1108	24.1884	29.2863	22.2905	29.382	34.7326	75.5856	86.4051	3	3	0
ENSMUSG00000005716	13853	ENSMUST00000005860, ENSMUST00000120592	Pvalb	protein_coding	cds	GGA	GCC	chr15	-	129.5	16	-94	78204098	78204096	31.8128	23.2781	26.535	11.8296	22.2785	39.7424	81.6259	73.8504	3	3	0
ENSMUSG00000005779	25309	ENSMUST00000005923	Psmb4	protein_coding	cds	CAG	TAT	chr3	-	368	105	-159	94886473	94886471	16.9347	10.5033	21.0965	15.4787	11.3905	13.103	48.5345	39.9723	3	3	0
ENSMUSG00000005982	14936	ENSMUST00000186375	Naa60	protein_coding	cds	GAT	GAC	chr16	+	190	20	-222	3894370	3894372	29.6017	20.999	41.0723	29.2212	31.9191	38.417	91.673	99.5573	3	3	0
ENSMUSG00000005982	14938	ENSMUST00000151988, ENSMUST00000135093, ENSMUST00000143537, ENSMUST00000147949, ENSMUST00000115860, ENSMUST00000175809, ENSMUST00000176224, ENSMUST00000150655	Naa60	protein_coding, nonsense_mediated_decay	cds	GAT	GAC	chr16	+	147.375	20	-130.125	3894434	3894436	27.2596	32.4366	46.8813	34.7435	42.2188	35.5189	106.578	112.481	3	3	0
ENSMUSG00000005982	14940	ENSMUST00000186375	Naa60	protein_coding	cds	GAT	GGA	chr16	+	370	80	-162	3897316	3897318	32.7841	37.9433	51.7451	30.0711	38.0576	30.7488	122.472	98.8775	3	3	0
ENSMUSG00000005982	14941	ENSMUST00000151988, ENSMUST00000176625, ENSMUST00000143537, ENSMUST00000115860, ENSMUST00000176224, ENSMUST00000150655	Naa60	protein_coding, nonsense_mediated_decay	cds	GAT	GGA	chr16	+	317.5	69.1667	-118.833	3897380	3899873	36.3296	34.7836	55.4644	29.8621	38.6138	31.1336	126.578	99.6096	3	3	0
ENSMUSG00000006057	7054	ENSMUST00000090541, ENSMUST00000107686, ENSMUST00000107684, ENSMUST00000178611	Atp5g1	protein_coding	cds	CAG	CCT	chr11	-	188.5	38	-98	96073965	96073963	55.9822	75.7151	137.745	77.162	106.05	58.1493	269.442	241.362	3	3	0
ENSMUSG00000006304	659	ENSMUST00000113820, ENSMUST00000006467, ENSMUST00000113819	Arpc2	protein_coding	cds	CGA	GAC	chr1	+	924	230.667	-64	74263774	74263776	21.5497	11.1367	30.7636	20.6742	20.332	26.7598	63.45	67.766	3	3	0
ENSMUSG00000006412	1986	ENSMUST00000135941	Pfdn2	protein_coding	cds	GCA	AAG	chr1	+	369	109	-45	171357888	171357890	14.3276	16.5713	19.2057	15.1736	14.8489	16.156	50.1046	46.1785	3	3	0
ENSMUSG00000006412	1987	ENSMUST00000006579	Pfdn2	protein_coding	cds	CAA	AGG	chr1	+	372	124	-5	171357889	171357891	17.5594	14.8627	21.9135	12.3744	18.2574	17.5879	54.3356	48.2197	3	3	0
ENSMUSG00000006575	7518	ENSMUST00000107105, ENSMUST00000107102, ENSMUST00000107103, ENSMUST00000006750	Rundc3a	protein_coding	5utr	NA	NA	chr11	+	150	-124	-1374	102393552	102393554	10.5686	24.1756	16.9716	16.3036	19.9326	18.528	51.7158	54.7641	3	3	0
ENSMUSG00000006651	34947	ENSMUST00000006828	Aplp1	protein_coding	cds	CAG	CCT	chr7	-	1609	514	-140	30436856	30436854	43.0859	54.7851	69.5202	49.6155	66.2865	66.7392	167.391	182.641	3	3	0
ENSMUSG00000006651	34959	ENSMUST00000006828	Aplp1	protein_coding	cds	GGC	GAA	chr7	-	493	142	-512	30443137	30443135	19.157	12.0419	16.7815	14.0442	14.3346	15.8683	47.9803	44.247	3	3	0
ENSMUSG00000006673	41383	ENSMUST00000193258, ENSMUST00000112155, ENSMUST00000006851	Qrich1	protein_coding	cds	CAG	CCA	chr9	+	923.333	243	-476	108534006	108534008	20.7242	17.2923	21.9899	14.7974	21.7825	22.0833	60.0063	58.6632	3	3	0
ENSMUSG00000006699	28162	ENSMUST00000051477, ENSMUST00000030417	Cdc42	protein_coding	cds	GAG	GAT	chr4	-	297.5	61	-130	137329120	137329118	22.7023	13.9382	50.1504	16.7818	23.4145	30.9207	86.7909	71.117	3	3	0
ENSMUSG00000006731	4237	ENSMUST00000006914	B4galnt1	protein_coding	5utr	NA	NA	chr10	+	113	-184	-1785	127165268	127165270	13.4699	10.6011	14.3258	16.0848	20.0523	19.7919	38.3968	55.9291	3	3	0
ENSMUSG00000006731	4240	ENSMUST00000006914	B4galnt1	protein_coding	cds	GGA	GGA	chr10	+	551	84.5	-448	127166190	127166192	30.5521	15.1333	20.914	17.2993	25.9577	35.9671	66.5995	79.2241	3	3	0
ENSMUSG00000006740	18342	ENSMUST00000025083	Kif5b	protein_coding	5utr	NA	NA	chr18	-	228	-189	-3080	6241296	6241294	29.0473	29.6561	20.6025	23.1206	17.2922	17.9719	79.3059	58.3847	3	3	0
ENSMUSG00000006782	7315	ENSMUST00000103120	Cnp	protein_coding	cds	GAG	AAG	chr11	+	375	71	-349	100576445	100576447	21.7808	22.612	25.124	26.5735	31.2449	28.0248	69.5169	85.8433	3	3	0
ENSMUSG00000006818	16484	ENSMUST00000007012	Sod2	protein_coding	cds	GGA	GAG	chr17	+	571	113.5	-108	13013453	13013455	10.8122	10.7829	19.9575	19.1231	20.5697	12.3826	41.5526	52.0754	3	3	0
ENSMUSG00000006818	16485	ENSMUST00000007012	Sod2	protein_coding	cds	CAA	GGA	chr17	+	739	170	-52	13015034	13015036	11.9027	14.5418	17.4795	14.3108	18.6023	17.282	43.924	50.1951	3	3	0
ENSMUSG00000006941	41642	ENSMUST00000007139	Eif1b	protein_coding	cds	AAT	GGA	chr9	+	527	69	-44	120494937	120494939	27.0292	25.1899	24.0224	16.7706	20.3959	27.721	76.2415	64.8875	3	3	0
ENSMUSG00000007097	2038	ENSMUST00000085913, ENSMUST00000097464	Atp1a2	protein_coding	cds	ACG	GCC	chr1	-	2920	916	-67.5	172278349	172278347	36.8684	25.5755	65.2016	16.8679	23.2927	44.7274	127.646	84.888	3	3	0
ENSMUSG00000007097	2055	ENSMUST00000085913, ENSMUST00000097464	Atp1a2	protein_coding	cds	GAG	AAC	chr1	-	1477	435	-548.5	172285985	172285983	30.6304	20.8695	35.3129	21.2821	25.3036	25.6538	86.8128	72.2395	3	3	0
ENSMUSG00000007097	2060	ENSMUST00000085913, ENSMUST00000097464	Atp1a2	protein_coding	cds	GAG	GAC	chr1	-	529	119	-864.5	172291217	172291215	17.4263	11.6894	31.6669	11.676	15.5984	18.5208	60.7825	45.7952	3	3	0
ENSMUSG00000007097	2062	ENSMUST00000085913, ENSMUST00000097464	Atp1a2	protein_coding	cds	CGT	GAG	chr1	-	190	6	-977.5	172293671	172293669	35.9944	13.8086	12.1329	13.6707	11.4572	24.5632	61.9359	49.6911	3	3	0
ENSMUSG00000007097	2066	ENSMUST00000085913, ENSMUST00000097464	Atp1a2	protein_coding	5utr	NA	NA	chr1	-	127	-46	-2998.5	172297938	172297936	31.9038	17.8655	38.2018	17.5994	15.2995	24.7482	87.9711	57.6471	3	3	0
ENSMUSG00000007107	2025	ENSMUST00000111243	Atp1a4	protein_coding	cds	GAC	CTC	chr1	-	2909	941	-91	172227353	172227351	30.8388	10.7803	26.1559	17.9125	12.2039	21.4622	67.775	51.5786	3	3	0
ENSMUSG00000007107	2029	ENSMUST00000111243	Atp1a4	protein_coding	cds	GGG	GTG	chr1	-	2264	726	-306	172234095	172234093	20.0692	10.681	26.3809	11.6275	15.6012	16.114	57.1311	43.3428	3	3	0
ENSMUSG00000007564	16531	ENSMUST00000007708	Ppp2r1a	protein_coding	cds	GCA	GAA	chr17	+	684	163	-426	20956006	20956008	80.3349	47.7801	80.0059	69.9925	79.5306	41.3092	208.121	190.832	3	3	0
ENSMUSG00000007564	16532	ENSMUST00000173658	Ppp2r1a	nonsense_mediated_decay	3utr	NA	NA	chr17	+	379	359	93	20956007	20956009	22.0125	14.8424	33.4324	30.4508	33.6305	14.1219	70.2873	78.2033	3	3	0
ENSMUSG00000007564	16533	ENSMUST00000173658	Ppp2r1a	nonsense_mediated_decay	3utr	NA	NA	chr17	+	380	360	94	20956008	20956010	47.36	20.7897	29.5099	23.4543	26.1836	18.5688	97.6596	68.2066	3	3	0
ENSMUSG00000007564	16538	ENSMUST00000007708	Ppp2r1a	protein_coding	cds	CGT	GAG	chr17	+	1569	458	-131	20961595	20961597	12.4561	11.9675	16.628	14.372	13.0962	18.5253	41.0517	45.9936	3	3	0
ENSMUSG00000007653	5179	ENSMUST00000007797, ENSMUST00000192403	Gabrb2	protein_coding	cds	GGA	ATT	chr11	+	1044.5	276.5	-216	42593948	42597541	22.0654	14.5244	42.8294	27.9103	34.5033	21.5668	79.4192	83.9803	3	3	0
ENSMUSG00000007777	5348	ENSMUST00000007921, ENSMUST00000109098	0610009B22Rik	protein_coding	cds	GCA	GAA	chr11	-	249.5	26.5	-113	51685989	51685987	16.3162	14.9175	26.1268	18.0784	19.774	22.219	57.3605	60.0714	3	3	0
ENSMUSG00000007815	41339	ENSMUST00000007959, ENSMUST00000194701	Rhoa	protein_coding	cds	GAA	GAT	chr9	+	618.5	63	-115.5	108330903	108330905	47.3364	23.3136	59.2853	23.2882	33.1161	30.5302	129.935	86.9345	3	3	0
ENSMUSG00000007815	41340	ENSMUST00000007959, ENSMUST00000194701	Rhoa	protein_coding	cds	CCT	GAT	chr9	+	693.5	88	-90.5	108330978	108330980	17.1429	12.3436	10.165	22.0778	13.8987	24.7879	39.6515	60.7643	3	3	0
ENSMUSG00000007836	10907	ENSMUST00000007980	Hnrnpa0	protein_coding	cds	ACG	AAG	chr13	-	372	43	-262	58128185	58128183	22.8268	23.6416	27.366	22.9419	37.463	26.4698	73.8345	86.8747	3	3	0
ENSMUSG00000007850	5324	ENSMUST00000109142, ENSMUST00000069304	Hnrnph1	protein_coding	cds	GAA	AAC	chr11	+	1538.5	437.5	-11	50385154	50385156	18.1477	12.0667	39.9384	17.454	13.5554	12.3462	70.1529	43.3556	3	3	0
ENSMUSG00000007891	36898	ENSMUST00000066401	Ctsd	protein_coding	cds	TAT	ATA	chr7	-	1088	345	-59	142376728	142376726	32.9166	22.5476	62.9686	20.1738	27.1355	32.7286	118.433	80.0379	3	3	0
ENSMUSG00000007891	36899	ENSMUST00000151120	Ctsd	protein_coding	cds	TAT	ATA	chr7	-	1287	351	-59	142376845	142376843	32.9166	22.5476	62.9686	20.1738	27.1355	32.7286	118.433	80.0379	3	3	0
ENSMUSG00000007891	36926	ENSMUST00000066401	Ctsd	protein_coding	cds	GGC	CCC	chr7	-	200	49	-355	142385502	142385500	27.6476	14.132	33.0458	20.6193	17.6014	34.6858	74.8254	72.9065	3	3	0
ENSMUSG00000007891	36927	ENSMUST00000151120	Ctsd	protein_coding	cds	GGC	CCC	chr7	-	381	49	-361	142385540	142385538	27.3839	13.8823	32.6178	20.311	17.3035	34.3321	73.8841	71.9467	3	3	0
ENSMUSG00000007892	40441	ENSMUST00000008036	Rplp1	protein_coding	cds	GAT	AAG	chr9	-	189	25	-89	61913956	61913954	16.1877	16.7335	19.181	12.2671	14.622	18.3326	52.1022	45.2218	3	3	0
ENSMUSG00000007950	37906	ENSMUST00000008094	Abhd8	protein_coding	5utr	NA	NA	chr8	-	102	-79	-1398	71463556	71463554	70.3487	59.6823	137.094	56.7484	68.9944	60.9355	267.125	186.678	3	3	0
ENSMUSG00000007950	37907	ENSMUST00000008094	Abhd8	protein_coding	5utr	NA	NA	chr8	-	101	-80	-1399	71463557	71463555	16.0952	12.446	25.8434	12.0191	16.5119	19.6395	54.3846	48.1705	3	3	0
ENSMUSG00000007950	37911	ENSMUST00000008094	Abhd8	protein_coding	5utr	NA	NA	chr8	-	37	-144	-1463	71463621	71463619	35.0727	29.9606	43.3093	34.9572	23.6495	11.4582	108.343	70.065	3	3	0
ENSMUSG00000008153	33133	ENSMUST00000124998	Clstn3	protein_coding	cds	ACC	CTG	chr6	-	243	52	-139	124432014	124432012	16.4404	16.9664	17.3477	14.2945	29.3638	12.6992	50.7546	56.3576	3	3	0
ENSMUSG00000008153	33140	ENSMUST00000112523, ENSMUST00000008297	Clstn3	protein_coding	cds	GGA	CAC	chr6	-	2647.5	812.5	-125	124436852	124436850	30.8084	16.5469	20.5804	23.0961	27.0498	21.9701	67.9357	72.1161	3	3	0
ENSMUSG00000008153	33141	ENSMUST00000112523, ENSMUST00000008297	Clstn3	protein_coding	cds	GCT	GGA	chr6	-	2644.5	811.5	-126	124436855	124436853	13.6048	19.7539	20.9661	14.1055	15.9098	19.4156	54.3248	49.4309	3	3	0
ENSMUSG00000008153	33142	ENSMUST00000112523, ENSMUST00000008297	Clstn3	protein_coding	cds	AAC	GAA	chr6	-	2527.5	772.5	-165	124437393	124437391	12.0219	24.3479	15.0555	26.2558	34.0725	15.1342	51.4252	75.4624	3	3	0
ENSMUSG00000008153	33146	ENSMUST00000112523, ENSMUST00000008297	Clstn3	protein_coding	cds	GAT	GAC	chr6	-	2296.5	695.5	-242	124438373	124438371	15.004	13.0781	17.6275	19.9282	16.7812	17.9917	45.7096	54.7011	3	3	0
ENSMUSG00000008153	33152	ENSMUST00000112523, ENSMUST00000008297	Clstn3	protein_coding	cds	GGA	GAC	chr6	-	1693.5	494.5	-443	124449931	124450706	12.8046	11.7429	18.346	12.1296	19.5389	13.0633	42.8936	44.7318	3	3	0
ENSMUSG00000008153	33153	ENSMUST00000112523, ENSMUST00000008297	Clstn3	protein_coding	cds	GGT	ATC	chr6	-	1546.5	445.5	-492	124451400	124451398	10.6447	19.2198	14.4374	13.9079	14.0164	21.9319	44.302	49.8563	3	3	0
ENSMUSG00000008153	33155	ENSMUST00000112523, ENSMUST00000008297	Clstn3	protein_coding	cds	TGG	CCG	chr6	-	1423.5	404.5	-533	124456931	124456929	11.2784	25.1674	17.479	38.4094	41.9377	24.7791	53.9248	105.126	3	3	0
ENSMUSG00000008153	33159	ENSMUST00000112523, ENSMUST00000008297	Clstn3	protein_coding	cds	GGC	ATC	chr6	-	952.5	247.5	-690	124458674	124458672	10.4167	10.1301	18.5643	13.7425	13.9632	10.099	39.1111	37.8046	3	3	0
ENSMUSG00000008153	33160	ENSMUST00000112523, ENSMUST00000008297	Clstn3	protein_coding	cds	GTG	AAG	chr6	-	865.5	218.5	-719	124459189	124459187	20.0722	20.555	24.8597	28.7274	34.055	17.7216	65.4869	80.5041	3	3	0
ENSMUSG00000008153	33170	ENSMUST00000008297	Clstn3	protein_coding	5utr	NA	NA	chr6	-	162	-149	-3019	124464633	124464631	30.8059	41.8423	23.6083	70.8432	71.8822	24.3381	96.2566	167.064	3	3	0
ENSMUSG00000008575	27061	ENSMUST00000107245, ENSMUST00000107247, ENSMUST00000107246, ENSMUST00000050872, ENSMUST00000107248, ENSMUST00000064770	Nfib	protein_coding	cds	CCT	GGA	chr4	-	1876	346.333	-170	82330311	82330309	15.9611	13.445	13.9521	11.7485	12.1092	21.3314	43.3583	45.1891	3	3	0
ENSMUSG00000008575	27070	ENSMUST00000107245, ENSMUST00000107248, ENSMUST00000107247, ENSMUST00000107246, ENSMUST00000050872, ENSMUST00000064770	Nfib	protein_coding	5utr	NA	NA	chr4	-	762	-76	-1627	82504834	82504832	31.0666	19.0017	18.6932	21.0592	25.4745	21.53	68.7615	68.0637	3	3	0
ENSMUSG00000008690	14294	ENSMUST00000036987, ENSMUST00000074552, ENSMUST00000088717, ENSMUST00000145259	Ncaph2	protein_coding, nonsense_mediated_decay	5utr	NA	NA	chr15	+	55.5	-43	-1416.75	89355793	89355795	30.6214	12.7623	48.9677	15.5885	15.608	14.35	92.3513	45.5465	3	3	0
ENSMUSG00000008734	36243	ENSMUST00000008878	Gprc5b	protein_coding	cds	ATG	AGA	chr7	-	197	8	-402	118984621	118984619	21.1514	26.0178	34.3531	21.394	32.6159	45.0621	81.5224	99.0719	3	3	0
ENSMUSG00000008822	9118	ENSMUST00000008966, ENSMUST00000117138, ENSMUST00000121930	Acyp1	protein_coding	cds	GCA	AAC	chr12	-	445.667	97.3333	-21	85272678	85272676	13.6748	18.5584	15.2427	17.7908	21.1841	18.7552	47.4759	57.7301	3	3	0
ENSMUSG00000009013	30189	ENSMUST00000009157, ENSMUST00000112090	Dynll1	protein_coding	cds	GGC	CGA	chr5	-	395	58	-31	115298792	115298790	10.4213	16.3551	11.8392	16.7911	17.6184	16.7131	38.6155	51.1227	3	3	0
ENSMUSG00000009073	4605	ENSMUST00000109910, ENSMUST00000053079	Nf2	protein_coding	5utr	NA	NA	chr11	-	176.5	-290	-2072.5	4849275	4849273	20.3581	15.1761	20.9957	11.2582	17.8837	41.6127	56.5298	70.7547	3	3	0
ENSMUSG00000009394	32940	ENSMUST00000009538	Syn2	protein_coding	cds	TCT	ATT	chr6	+	818	218	-368	115239467	115239469	19.1392	11.4327	16.0539	15.853	19.4878	19.6299	46.6257	54.9707	3	3	0
ENSMUSG00000009894	5713	ENSMUST00000010038, ENSMUST00000120940, ENSMUST00000156146, ENSMUST00000136436, ENSMUST00000132969	Snap47	protein_coding	cds	CAG	CCT	chr11	-	416	83	-167	59438226	59438224	20.8519	16.834	33.4799	36.0305	41.5691	26.5834	71.1659	104.183	3	3	0
ENSMUSG00000010066	41258	ENSMUST00000010210, ENSMUST00000170737	Cacna2d2	protein_coding	cds	GTC	AAG	chr9	+	2214.5	662	-487	107518262	107518264	13.8771	13.9671	31.5631	19.5712	30.2318	24.8508	59.4072	74.6538	3	3	0
ENSMUSG00000010066	41261	ENSMUST00000010210, ENSMUST00000168532, ENSMUST00000085092, ENSMUST00000166799, ENSMUST00000170737, ENSMUST00000164988	Cacna2d2	protein_coding	cds	GAT	AAC	chr9	+	2598.83	794.5	-359.167	107524894	107524896	11.6616	19.2112	34.7608	25.1969	26.9486	14.5237	65.6335	66.6692	3	3	0
ENSMUSG00000010095	20101	ENSMUST00000170157	Slc3a2	protein_coding	cds	AAA	AAG	chr19	-	964	230	-335	8712737	8712735	28.0961	11.664	36.4813	14.7224	15.8443	28.7129	76.2414	59.2796	3	3	0
ENSMUSG00000010095	20102	ENSMUST00000010239	Slc3a2	protein_coding	cds	AAA	AAG	chr19	-	705	191	-335	8712755	8712753	28.0961	11.664	36.4813	14.7224	15.8443	28.7129	76.2414	59.2796	3	3	0
ENSMUSG00000010175	2364	ENSMUST00000175916, ENSMUST00000010319, ENSMUST00000177288	Prox1	protein_coding	5utr	NA	NA	chr1	-	490.667	-23	-2236	190162269	190162267	14.4803	21.6133	29.0153	24.354	29.9029	14.3914	65.109	68.6482	3	3	0
ENSMUSG00000010554	6312	ENSMUST00000010698, ENSMUST00000141755, ENSMUST00000128504, ENSMUST00000092912	Mettl16	protein_coding, nonsense_mediated_decay	cds	CCT	GAC	chr11	+	231	16.5	-331.375	74773572	74773574	10.776	11.8357	15.9217	13.2912	19.7767	18.942	38.5334	52.0099	3	3	0
ENSMUSG00000010609	2235	ENSMUST00000111106, ENSMUST00000111108, ENSMUST00000010753, ENSMUST00000111105, ENSMUST00000111104	Psen2	protein_coding	cds	GGA	GAA	chr1	-	1067.6	330.3	-117	180229465	180229463	12.6839	10.3021	13.6708	11.6098	14.2389	18.1728	36.6568	44.0215	3	3	0
ENSMUSG00000010803	5123	ENSMUST00000020707	Gabra1	protein_coding	cds	GAA	AAG	chr11	-	1830	350	-105	42135414	42135412	18.2284	15.2381	17.1923	20.0085	25.9556	25.7011	50.6587	71.6653	3	3	0
ENSMUSG00000010803	5143	ENSMUST00000020707	Gabra1	protein_coding	cds	GTG	AAG	chr11	-	978	66	-389	42162608	42162606	10.3266	10.2741	17.4363	14.0035	19.6451	13.1612	38.037	46.8097	3	3	0
ENSMUSG00000010803	5150	ENSMUST00000132971	Gabra1	protein_coding	cds	GAT	GCC	chr11	-	125	41	-90	42182322	42182320	16.2406	18.8667	19.8357	30.3981	37.1783	19.735	54.943	87.3113	3	3	0
ENSMUSG00000010914	22643	ENSMUST00000111183, ENSMUST00000132449, ENSMUST00000011058	Pdhx	protein_coding	cds	GGA	GAC	chr2	-	218.667	64.3333	-248.333	103046805	103046803	15.6517	19.2779	10.8062	21.6109	27.989	20.2462	45.7358	69.8461	3	3	0
ENSMUSG00000011752	20488	ENSMUST00000011896	Pgam1	protein_coding	cds	GCA	GAA	chr19	+	425	100	-154	41915713	41915715	26.2039	25.6747	48.6441	28.8058	38.9107	30.8027	100.523	98.5191	3	3	0
ENSMUSG00000012848	33984	ENSMUST00000108539, ENSMUST00000004554, ENSMUST00000147435, ENSMUST00000137329	Rps5	protein_coding	cds	GAT	ATT	chr7	+	230.75	31	-163.25	12923066	12923068	16.9079	11.7851	20.9762	16.8422	17.4102	10.4676	49.6692	44.72	3	3	0
ENSMUSG00000013033	38181	ENSMUST00000141158, ENSMUST00000045393, ENSMUST00000132500, ENSMUST00000152978, ENSMUST00000131717	Adgrl1	protein_coding	cds	AGG	GAA	chr8	+	4123.33	1206	-248	83937923	83937925	14.0219	10.9279	47.9803	15.0505	17.6111	15.0292	72.9301	47.6908	3	3	0
ENSMUSG00000013523	24136	ENSMUST00000154650	Bcas1	protein_coding	cds	ACA	AGA	chr2	-	402	134	-245	170387198	170387196	17.57	18.8982	14.6871	10.8547	14.9769	27.8771	51.1552	53.7087	3	3	0
ENSMUSG00000013523	24137	ENSMUST00000068137, ENSMUST00000013667, ENSMUST00000109152	Bcas1	protein_coding	cds	AAC	AAG	chr2	-	980.333	293.667	-305.333	170387199	170387197	16.2432	19.2762	17.1628	12.8203	14.8981	23.4095	52.6822	51.128	3	3	0
ENSMUSG00000013523	24140	ENSMUST00000154650	Bcas1	protein_coding	cds	ATG	GTG	chr2	-	216	72	-307	170406294	170406292	24.6785	19.2302	30.7445	18.0945	42.5973	15.3278	74.6532	76.0196	3	3	0
ENSMUSG00000013523	24142	ENSMUST00000154650	Bcas1	protein_coding	cds	TGG	ACA	chr2	-	108	35.5	-343	170406402	170406400	25.7127	15.6121	22.2896	24.8359	23.5187	16.5178	63.6144	64.8724	3	3	0
ENSMUSG00000013523	24143	ENSMUST00000068137, ENSMUST00000013667, ENSMUST00000109152	Bcas1	protein_coding	cds	CTG	GAC	chr2	-	686.333	195.667	-403.333	170406403	170406401	32.5336	21.1626	29.1419	30.6857	31.7087	20.2518	82.8381	82.6462	3	3	0
ENSMUSG00000013662	20440	ENSMUST00000070210	Atad1	protein_coding	cds	CAG	CCT	chr19	-	629	157	-204	32695898	32698440	10.5714	11.1338	21.1555	13.8573	19.3914	24.0863	42.8608	57.335	3	3	0
ENSMUSG00000013662	20441	ENSMUST00000070210	Atad1	protein_coding	cds	CAG	CCT	chr19	-	527	123	-238	32698542	32698540	14.0036	15.3326	25.4292	12.0167	14.8863	27.1222	54.7654	54.0252	3	3	0
ENSMUSG00000013663	20444	ENSMUST00000013807	Pten	protein_coding	5utr	NA	NA	chr19	+	153	-796	-2007	32757649	32757651	24.7143	35.7472	20.7855	22.3468	23.4819	29.0168	81.2471	74.8455	3	3	0
ENSMUSG00000014313	13314	ENSMUST00000014457, ENSMUST00000153512	Cox6c	protein_coding	cds	TAT	GAT	chr15	-	422.5	56	-20	35935363	35935361	44.23	31.4013	73.322	43.952	38.547	67.4637	148.953	149.963	3	3	0
ENSMUSG00000014470	39051	ENSMUST00000014614	Rnf166	protein_coding	cds	CAG	CCA	chr8	-	221	57.5	-179	122470338	122470336	21.9367	11.5813	17.7932	14.1248	16.8028	15.2717	51.3112	46.1993	3	3	0
ENSMUSG00000014606	6170	ENSMUST00000014750, ENSMUST00000139638, ENSMUST00000136383	Slc25a11	protein_coding	cds	GGA	ATA	chr11	-	424.333	77.6667	-116	70645942	70645940	17.006	11.3476	16.7226	23.6568	22.7718	32.9683	45.0762	79.3968	3	3	0
ENSMUSG00000014769	16498	ENSMUST00000014913	Psmb1	protein_coding	cds	CAG	CCT	chr17	-	552	172	-68	15476205	15476203	30.953	30.465	33.2087	33.8447	42.2334	34.3612	94.6266	110.439	3	3	0
ENSMUSG00000014769	16499	ENSMUST00000014913	Psmb1	protein_coding	cds	GGC	TCT	chr17	-	498	154	-86	15477368	15477366	20.7177	19.341	26.4967	16.0913	21.6047	31.0288	66.5555	68.7249	3	3	0
ENSMUSG00000014959	22148	ENSMUST00000112201, ENSMUST00000028509, ENSMUST00000112205, ENSMUST00000133432	Gorasp2	protein_coding	cds	GGA	AAG	chr2	+	794.75	203.5	-183.5	70682957	70682959	13.435	11.0179	25.9041	12.1533	19.8133	11.9301	50.3571	43.8967	3	3	0
ENSMUSG00000015094	21120	ENSMUST00000071442, ENSMUST00000133409, ENSMUST00000141567	Npdc1	protein_coding	cds	GGG	GAG	chr2	+	271	62.8333	-215.5	25406360	25407596	20.9871	15.9812	37.7428	11.6625	15.2032	11.0225	74.711	37.8881	3	3	0
ENSMUSG00000015120	16733	ENSMUST00000049911, ENSMUST00000173084, ENSMUST00000173713, ENSMUST00000174216, ENSMUST00000172618, ENSMUST00000174031, ENSMUST00000174001	Ube2i	protein_coding	cds	GGA	ATA	chr17	-	656	105.857	-44	25264837	25264835	17.2552	15.3331	15.3446	12.867	16.8956	13.5017	47.933	43.2643	3	3	0
ENSMUSG00000015120	16737	ENSMUST00000173621, ENSMUST00000172618, ENSMUST00000174001, ENSMUST00000172868, ENSMUST00000049911, ENSMUST00000173084, ENSMUST00000173713, ENSMUST00000174031, ENSMUST00000172587	Ube2i	protein_coding	cds	CCT	GGA	chr17	-	425	45	-94.1111	25269207	25269205	12.8366	15.7764	17.2172	13.6459	14.9737	10.5149	45.8301	39.1345	3	3	0
ENSMUSG00000015165	34784	ENSMUST00000174548, ENSMUST00000172529, ENSMUST00000038572	Hnrnpl	protein_coding	cds	GGT	GAC	chr7	+	994.333	246.667	-296	28815351	28818461	21.2868	16.1604	24.6195	15.078	20.776	21.4239	62.0668	57.2779	3	3	0
ENSMUSG00000015222	578	ENSMUST00000114013, ENSMUST00000156636, ENSMUST00000114017, ENSMUST00000114015, ENSMUST00000123647, ENSMUST00000024639, ENSMUST00000114018	Map2	protein_coding	5utr	NA	NA	chr1	+	365.857	-26	-1712.71	66362278	66362280	21.5733	17.7086	19.5712	16.0142	21.6003	22.1993	58.8531	59.8138	3	3	0
ENSMUSG00000015291	42979	ENSMUST00000153141	Gdi1	protein_coding	5utr	NA	NA	chrX	+	85	-209	-442	74305397	74305399	32.9263	54.7105	48.4709	42.1354	64.7405	16.8308	136.108	123.707	3	3	0
ENSMUSG00000015291	42989	ENSMUST00000015435	Gdi1	protein_coding	cds	GTG	CCA	chrX	+	753	118	-329	74307203	74307205	10.4662	11.6729	12.8328	16.2399	11.1213	13.173	34.972	40.5341	3	3	0
ENSMUSG00000015653	28751	ENSMUST00000115426, ENSMUST00000115427, ENSMUST00000115425, ENSMUST00000015797, ENSMUST00000115424, ENSMUST00000148333, ENSMUST00000164219	Steap2	protein_coding	cds	GCA	GAG	chr5	-	633.857	127.5	-344	5682639	5682637	15.291	13.8798	29.3624	21.0851	16.141	25.458	58.5332	62.6842	3	3	0
ENSMUSG00000015656	39674	ENSMUST00000015800, ENSMUST00000117557	Hspa8	protein_coding	cds	ACA	AAG	chr9	+	583	124	-512.5	40802584	40802586	12.0953	10.3661	17.2462	20.8678	20.3837	14.2114	39.7076	55.4629	3	3	0
ENSMUSG00000015656	39677	ENSMUST00000015800, ENSMUST00000117557	Hspa8	protein_coding	cds	GGA	ACT	chr9	+	665.5	151.5	-485	40802810	40802812	31.5905	14.4018	29.7249	21.1698	26.3048	19.8255	75.7172	67.3	3	3	0
ENSMUSG00000015656	39710	ENSMUST00000015800, ENSMUST00000117557	Hspa8	protein_coding	cds	GGT	GTA	chr9	+	1490.5	426.5	-210	40803927	40803929	22.5771	20.4587	18.1129	26.6558	53.5572	16.9643	61.1488	97.1773	3	3	0
ENSMUSG00000015656	39729	ENSMUST00000015800, ENSMUST00000117557	Hspa8	protein_coding	cds	GAC	AAG	chr9	+	1895.5	561.5	-75	40804653	40804655	13.6191	12.5733	26.8283	16.14	23.7208	19.7166	53.0207	59.5774	3	3	0
ENSMUSG00000015656	39731	ENSMUST00000015800, ENSMUST00000117557	Hspa8	protein_coding	cds	GAT	AAG	chr9	+	1925.5	571.5	-65	40804683	40804685	37.5616	32.1851	54.0174	44.3168	53.3644	42.1044	123.764	139.786	3	3	0
ENSMUSG00000015656	39739	ENSMUST00000015800, ENSMUST00000117557	Hspa8	protein_coding	cds	ACC	ATT	chr9	+	2102.5	630.5	-6	40805096	40805098	31.4981	13.3939	28.0864	17.3571	12.8475	19.5205	72.9784	49.7251	3	3	0
ENSMUSG00000015671	9725	ENSMUST00000170836	Psma2	protein_coding	cds	GGT	AAG	chr13	+	83	16	-218	14616020	14616022	24.2521	17.7469	35.3191	24.6313	22.9514	31.2244	77.3181	78.8071	3	3	0
ENSMUSG00000015671	9727	ENSMUST00000170836	Psma2	protein_coding	cds	ACT	CCA	chr13	+	698	221	-13	14625425	14625427	11.9487	13.0541	13.5653	19.5422	22.9906	16.1396	38.568	58.6724	3	3	0
ENSMUSG00000015714	25361	ENSMUST00000129267, ENSMUST00000015858, ENSMUST00000139866	Cers2	protein_coding	cds	GAG	GGA	chr3	+	680.667	167	-114.667	95321368	95321370	30.5526	17.1495	32.026	14.6031	17.8939	37.7771	79.7281	70.2741	3	3	0
ENSMUSG00000015757	2451	ENSMUST00000015901	Ppil4	protein_coding	cds	AAT	CCT	chr10	+	1275	404.5	-87	7814799	7814801	22.7931	21.5642	43.5194	10.3097	16.8264	28.2843	87.8767	55.4204	3	3	0
ENSMUSG00000015759	12070	ENSMUST00000015903	Cnih1	protein_coding	cds	TAC	AAG	chr14	-	259	37	-107	46784151	46784149	12.0938	10.9834	12.925	14.1451	15.2115	20.8847	36.0022	50.2412	3	3	0
ENSMUSG00000015759	12072	ENSMUST00000146629	Cnih1	protein_coding	cds	TAC	AAG	chr14	-	182	37	-123	46788230	46788228	12.0938	10.9834	16.6126	14.1451	15.2115	20.8847	39.6898	50.2412	3	3	0
ENSMUSG00000015944	30831	ENSMUST00000016088	Castor2	protein_coding	5utr	NA	NA	chr5	+	159	-170	-1159	134099869	134099871	16.8716	13.8171	21.1775	10.1214	13.6078	11.9818	51.8661	35.7111	3	3	0
ENSMUSG00000016319	42618	ENSMUST00000016463	Slc25a5	protein_coding	cds	CAA	ATC	chrX	+	209	43	-255	36796860	36796862	11.131	11.4335	20.926	11.0191	12.0754	14.6407	43.4905	37.7351	3	3	0
ENSMUSG00000016344	24323	ENSMUST00000016488, ENSMUST00000108841	Ppdpf	protein_coding	5utr	NA	NA	chr2	+	95.5	-143.5	-490.5	181187386	181187388	22.2528	26.3094	22.1288	12.0595	18.4719	27.29	70.6911	57.8215	3	3	0
ENSMUSG00000016349	24298	ENSMUST00000055990	Eef1a2	protein_coding	cds	GAT	ATT	chr2	-	1320	318	-145	181149751	181149749	10.3519	15.5456	15.9597	15.8625	16.0444	17.4536	41.8573	49.3604	3	3	0
ENSMUSG00000016349	24301	ENSMUST00000055990	Eef1a2	protein_coding	cds	GTG	AAG	chr2	-	1230	288	-175	181149841	181149839	21.2994	24.7803	16.7836	25.144	24.0952	18.2085	62.8634	67.4478	3	3	0
ENSMUSG00000016349	24312	ENSMUST00000055990	Eef1a2	protein_coding	cds	GCG	GAC	chr2	-	690	108	-355	181153080	181153651	26.5581	24.3481	21.0617	24.4026	27.6022	19.5057	71.9678	71.5105	3	3	0
ENSMUSG00000016503	31378	ENSMUST00000146511, ENSMUST00000132102	Gtf3a	protein_coding	cds	GAT	GCG	chr5	+	151	17	-336	146948831	146948833	17.5434	24.2214	16.3333	21.2289	30.0222	26.3604	58.0981	77.6115	3	3	0
ENSMUSG00000016559	7857	ENSMUST00000106454, ENSMUST00000016703	H3f3b	protein_coding	cds	AGG	CCA	chr11	-	498	42	-94	116023884	116023882	21.2173	17.2811	50.0579	22.1121	25.8594	16.8313	88.5564	64.8028	3	3	0
ENSMUSG00000016940	7809	ENSMUST00000103035, ENSMUST00000106533	Kctd2	protein_coding	cds	GGT	CCT	chr11	+	413	128	-172.5	115422027	115422029	10.2247	10.9109	13.0952	14.1842	12.3769	11.5368	34.2308	38.0978	3	3	0
ENSMUSG00000017390	6543	ENSMUST00000017534, ENSMUST00000102478	Aldoc	protein_coding	cds	GAT	AAG	chr11	+	531.5	99	-264	78324788	78324790	17.8151	27.3176	64.0399	40.8851	52.9414	38.1572	109.173	131.984	3	3	0
ENSMUSG00000017390	6548	ENSMUST00000017534, ENSMUST00000102478	Aldoc	protein_coding	cds	AGT	GAT	chr11	+	696.5	154	-209	78325131	78325133	11.478	18.6152	13.0299	18.7377	30.9163	23.9153	43.1231	73.5693	3	3	0
ENSMUSG00000017390	6551	ENSMUST00000017534, ENSMUST00000102478	Aldoc	protein_coding	cds	GAG	AAT	chr11	+	729.5	165	-198	78325164	78325166	10.3173	17.372	14.4673	18.8878	21.6002	12.9966	42.1566	53.4846	3	3	0
ENSMUSG00000017390	6555	ENSMUST00000017534, ENSMUST00000102478	Aldoc	protein_coding	cds	GGG	ATC	chr11	+	777.5	181	-182	78325331	78325333	36.8809	38.7451	73.8911	62.5229	62.1048	50.1837	149.517	174.811	3	3	0
ENSMUSG00000017390	6562	ENSMUST00000017534, ENSMUST00000102478	Aldoc	protein_coding	cds	GGG	ACT	chr11	+	909.5	225	-138	78325692	78325694	29.5163	34.2654	29.92	48.6638	56.7899	40.012	93.7016	145.466	3	3	0
ENSMUSG00000017404	7167	ENSMUST00000017548, ENSMUST00000092425	Rpl19	protein_coding	cds	AGG	CTT	chr11	+	79	7	-188	98027841	98027843	19.8935	17.5118	24.5344	14.3993	17.1888	15.2141	61.9398	46.8023	3	3	0
ENSMUSG00000017417	7157	ENSMUST00000017561, ENSMUST00000107565	Plxdc1	protein_coding	cds	GAT	ATC	chr11	-	848	247.5	-256	97953965	97953963	14.7406	18.5125	12.7541	16.9042	17.3925	28.3743	46.0072	62.671	3	3	0
ENSMUSG00000017417	7160	ENSMUST00000017561, ENSMUST00000107565	Plxdc1	protein_coding	cds	GTG	AAG	chr11	-	473	122.5	-381	97956468	97956466	23.0334	12.8943	40.2897	25.3945	23.2543	19.2899	76.2175	67.9387	3	3	0
ENSMUSG00000017421	6653	ENSMUST00000178665, ENSMUST00000017567, ENSMUST00000108216, ENSMUST00000053740, ENSMUST00000153824, ENSMUST00000188489, ENSMUST00000165565	Zfp207	nonsense_mediated_decay, protein_coding	cds	GGA	ATT	chr11	+	813	227.643	-189.214	80391860	80391862	26.2916	13.6239	25.5795	19.5435	29.4163	20.3146	65.4949	69.2744	3	3	0
ENSMUSG00000017485	11645	ENSMUST00000017629	Top2b	protein_coding	5utr	NA	NA	chr14	+	400	-101	-4939	16365578	16365580	16.2797	32.494	11.3832	11.488	25.3771	10.2426	60.1568	47.1077	3	3	0
ENSMUSG00000017631	6429	ENSMUST00000094012, ENSMUST00000072740, ENSMUST00000176179, ENSMUST00000176024	Abr	protein_coding	cds, 5utr	GAG, NA	GAC, NA	chr11	-	299.75	-14.5	-611.5	76509056	76509054	12.7196	10.9333	14.3442	12.538	15.1307	15.25	37.9972	42.9187	3	3	0
ENSMUSG00000017707	23923	ENSMUST00000017851	Serinc3	protein_coding	cds	GGT	ATC	chr2	-	521	142	-330	163634484	163634482	13.5573	16.8375	11.9509	23.381	20.8025	13.1648	42.3457	57.3483	3	3	0
ENSMUSG00000017734	23980	ENSMUST00000149287, ENSMUST00000069385, ENSMUST00000109349, ENSMUST00000109350, ENSMUST00000017878	Dbndd2	nonsense_mediated_decay, protein_coding	cds	GGA	GAC	chr2	+	640.6	134	-24	164490260	164490262	15.2006	10.8348	15.2065	15.1562	17.311	14.8424	41.2418	47.3095	3	3	0
ENSMUSG00000017740	24021	ENSMUST00000099092	Slc12a5	protein_coding	cds	AAC	ATC	chr2	+	747	109	-1006	164974954	164974956	14.3703	13.2787	30.8545	19.9627	28.0517	17.4818	58.5035	65.4963	3	3	0
ENSMUSG00000017740	24026	ENSMUST00000099092	Slc12a5	protein_coding	cds	GGC	ATT	chr2	+	1452	343.5	-771	164980332	164980334	17.843	11.601	13.3707	10.4884	19.5452	23.0425	42.8147	53.0761	3	3	0
ENSMUSG00000017778	11173	ENSMUST00000131011, ENSMUST00000132233	Cox7c	protein_coding	cds	AAC	AAG	chr13	-	412	25	-31	86045849	86045847	13.8457	26.0278	16.5999	21.9095	30.755	33.1788	56.4734	85.8433	3	3	0
ENSMUSG00000017781	6346	ENSMUST00000102509, ENSMUST00000143219, ENSMUST00000179445, ENSMUST00000179521	Pitpna	nonsense_mediated_decay, protein_coding	cds	AAT	ATA	chr11	+	458.25	82	-146.25	75603434	75603436	12.1391	15.7612	18.8312	16.1241	13.5863	13.7168	46.7315	43.4272	3	3	0
ENSMUSG00000017943	23905	ENSMUST00000109421, ENSMUST00000018087, ENSMUST00000137070, ENSMUST00000109420	Gdap1l1	protein_coding	cds	GAA	CCG	chr2	+	312	85.75	-256.75	163446108	163446110	12.1418	17.5272	18.4754	10.4508	16.5964	12.7977	48.1443	39.845	3	3	0
ENSMUSG00000017978	31631	ENSMUST00000115358, ENSMUST00000018122, ENSMUST00000142913, ENSMUST00000115361, ENSMUST00000069074, ENSMUST00000115356, ENSMUST00000166458, ENSMUST00000163871	Cadps2	protein_coding	cds	CAG	CCC	chr6	-	402.5	97.75	-1120.5	23838823	23838821	24.5756	18.9182	41.6823	21.0711	29.4933	34.4379	85.1761	85.0023	3	3	0
ENSMUSG00000018199	1572	ENSMUST00000159879	Ro60	protein_coding	cds	CAG	CCA	chr1	-	193	7.5	-530	143770982	143770980	18.5157	12.2751	17.951	11.5	13.7005	16.4943	48.7419	41.6948	3	3	0
ENSMUSG00000018286	6160	ENSMUST00000018430	Psmb6	protein_coding	cds	GGA	GAC	chr11	+	680	223	-15	70527531	70527533	31.139	19.4124	52.7384	29.6789	38.6941	29.2218	103.29	97.5948	3	3	0
ENSMUSG00000018326	23946	ENSMUST00000018470, ENSMUST00000131288	Ywhab	protein_coding	cds	GCA	GAA	chr2	+	729.5	113	-89	164014044	164014046	31.4981	17.6524	27.4829	26.3714	21.397	32.7774	76.6334	80.5458	3	3	0
ENSMUSG00000018326	23949	ENSMUST00000131288, ENSMUST00000018470	Ywhab	protein_coding	cds	GGA	GAA	chr2	+	792.333	135.667	-51.3333	164014113	164014115	16.4182	10.2661	12.1698	12.4756	19.1081	13.2972	38.8541	44.8809	3	3	0
ENSMUSG00000018411	7606	ENSMUST00000106992, ENSMUST00000106988, ENSMUST00000106989, ENSMUST00000106993, ENSMUST00000100347	Mapt	protein_coding	cds	AGG	GAG	chr11	+	1490.2	471.8	-63	104327995	104327997	26.4	23.3187	29.4192	37.9266	50.2951	16.754	79.1379	104.976	3	3	0
ENSMUSG00000018567	6104	ENSMUST00000018711	Gabarap	protein_coding	cds	TTG	ATC	chr11	+	756	62	-55	69992598	69992600	22.1628	11.0337	24.6549	10.4383	18.6796	12.1313	57.8514	41.2492	3	3	0
ENSMUSG00000018770	22226	ENSMUST00000111996, ENSMUST00000018914	Atp5g3	protein_coding	cds	GGT	ATT	chr2	-	413.5	89	-52	73909228	73909226	21.3983	26.1032	33.3212	18.7316	27.7545	35.7794	80.8226	82.2655	3	3	0
ENSMUSG00000018770	22231	ENSMUST00000111996, ENSMUST00000018914	Atp5g3	protein_coding	cds	AGG	GAG	chr2	-	314.5	56	-85	73909327	73909325	17.6403	12.7651	18.8288	18.6282	21.9846	13.1049	49.2341	53.7177	3	3	0
ENSMUSG00000018770	22234	ENSMUST00000111996, ENSMUST00000018914	Atp5g3	protein_coding	cds	GGA	GAG	chr2	-	257.5	37	-104	73909870	73909868	13.6057	16.6079	25.4652	25.1303	30.4015	20.6812	55.6787	76.213	3	3	0
ENSMUSG00000018770	22235	ENSMUST00000111996, ENSMUST00000018914	Atp5g3	protein_coding	cds	CCA	ATT	chr2	-	215.5	23	-118	73909912	73909910	11.1673	15.9131	18.2384	22.1191	23.7501	17.9264	45.3188	63.7956	3	3	0
ENSMUSG00000018965	29040	ENSMUST00000019109	Ywhah	protein_coding	cds	GAA	CCA	chr5	+	354	34	-212	33026556	33026558	14.5325	17.0036	35.9778	22.069	32.7724	26.7166	67.5139	81.558	3	3	0
ENSMUSG00000018965	29043	ENSMUST00000019109	Ywhah	protein_coding	cds	GAT	CGA	chr5	+	372	40	-206	33026574	33026576	19.7932	16.5345	24.0585	14.5106	14.0169	20.1961	60.3862	48.7236	3	3	0
ENSMUSG00000018965	29047	ENSMUST00000019109	Ywhah	protein_coding	cds	GAC	AAG	chr5	+	564	104	-142	33026766	33026768	24.9415	30.5022	62.5983	34.3621	40.2196	37.4805	118.042	112.062	3	3	0
ENSMUSG00000018965	29049	ENSMUST00000019109	Ywhah	protein_coding	cds	AAT	GAT	chr5	+	588	112	-134	33026790	33026792	52.6621	49.6262	49.9816	49.3904	54.8501	81.8229	152.27	186.063	3	3	0
ENSMUSG00000018965	29051	ENSMUST00000019109	Ywhah	protein_coding	cds	GGC	GAT	chr5	+	633	127	-119	33026835	33026837	23.3753	16.9393	24.1572	17.9151	28.524	18.9994	64.4717	65.4385	3	3	0
ENSMUSG00000018965	29057	ENSMUST00000019109	Ywhah	protein_coding	cds	CCC	ATC	chr5	+	759	169	-77	33026961	33026963	25.6109	28.4797	21.2981	21.2792	34.5042	28.3441	75.3887	84.1276	3	3	0
ENSMUSG00000018965	29058	ENSMUST00000019109	Ywhah	protein_coding	cds	TAT	GAG	chr5	+	801	183	-63	33027003	33027005	30.5709	38.2648	27.5791	69.6502	66.152	41.7996	96.4148	177.602	3	3	0
ENSMUSG00000018965	29061	ENSMUST00000019109	Ywhah	protein_coding	cds	GAG	GAT	chr5	+	888	212	-34	33027090	33027092	14.9526	28.7182	42.0496	29.9322	47.2528	10.7816	85.7204	87.9666	3	3	0
ENSMUSG00000018965	29062	ENSMUST00000019109	Ywhah	protein_coding	cds	GAT	TCC	chr5	+	891	213	-33	33027093	33027095	21.6075	14.0346	40.4459	19.5427	19.0982	26.621	76.088	65.2619	3	3	0
ENSMUSG00000019054	30960	ENSMUST00000019198	Fis1	protein_coding	5utr	NA	NA	chr5	+	52	-56	-514	136962128	136962130	17.5111	34.3601	51.9864	25.8499	51.2497	10.6988	103.858	87.7985	3	3	0
ENSMUSG00000019054	30961	ENSMUST00000019198	Fis1	protein_coding	5utr	NA	NA	chr5	+	53	-55	-513	136962129	136962131	87.8533	39.7857	77.283	32.1536	38.7467	39.1094	204.922	110.01	3	3	0
ENSMUSG00000019087	42944	ENSMUST00000136056, ENSMUST00000019231, ENSMUST00000147900, ENSMUST00000147275, ENSMUST00000114171	Atp6ap1	nonsense_mediated_decay, protein_coding	3utr, cds	NA, GAG	NA, AAG	chrX	+	455.2	196	-119.2	74300661	74300663	33.0669	19.3648	51.0343	33.8976	34.2799	42.6444	103.466	110.822	3	3	0
ENSMUSG00000019087	42945	ENSMUST00000136056	Atp6ap1	nonsense_mediated_decay	3utr	NA	NA	chrX	+	410	409	205	74300662	74300664	13.1707	10.6042	43.4463	26.8357	17.697	34.019	67.2211	78.5517	3	3	0
ENSMUSG00000019087	42971	ENSMUST00000019231, ENSMUST00000114171, ENSMUST00000154630	Atp6ap1	protein_coding	cds, 3utr	GGT, NA	GAA, NA	chrX	+	946.333	645.667	21.3333	74303817	74303819	17.1805	15.2233	12.6091	23.1074	24.7008	26.5447	45.0129	74.3529	3	3	0
ENSMUSG00000019087	42974	ENSMUST00000019231	Atp6ap1	protein_coding	cds	ATG	ATA	chrX	+	1396	438	-25	74303928	74303930	10.1837	13.5908	12.4034	13.1869	16.7432	23.9197	36.1779	53.8498	3	3	0
ENSMUSG00000019124	32051	ENSMUST00000019268	Scrn1	protein_coding	cds	GAA	CCT	chr6	-	1250	333	-81	54512136	54512134	16.7349	11.7897	23.6303	13.8578	13.2042	18.7911	52.1548	45.8531	3	3	0
ENSMUSG00000019146	13827	ENSMUST00000019290	Cacng2	protein_coding	5utr	NA	NA	chr15	-	197	-941	-1912	78119832	78119830	11.8936	13.0318	32.8416	30.5082	31.525	11.5833	57.767	73.6166	3	3	0
ENSMUSG00000019146	13830	ENSMUST00000019290	Cacng2	protein_coding	5utr	NA	NA	chr15	-	193	-945	-1916	78119836	78119834	18.8459	21.1778	19.7804	35.543	33.1213	16.5042	59.8041	85.1685	3	3	0
ENSMUSG00000019146	13832	ENSMUST00000019290	Cacng2	protein_coding	5utr	NA	NA	chr15	-	137	-1001	-1972	78119892	78119890	22.3998	26.3706	31.4422	30.7333	31.8986	37.0253	80.2125	99.6572	3	3	0
ENSMUSG00000019179	30914	ENSMUST00000019323	Mdh2	protein_coding	cds	GGT	GTG	chr5	+	757	167	-171	135786304	135786306	14.4054	10.1798	19.039	14.6604	13.0831	13.7759	43.6242	41.5193	3	3	0
ENSMUSG00000019194	35047	ENSMUST00000098548	Scn1b	protein_coding	5utr	NA	NA	chr7	-	84	-215	-871	31126862	31126860	24.7144	32.4332	29.3827	28.7884	37.616	33.003	86.5303	99.4074	3	3	0
ENSMUSG00000019254	33893	ENSMUST00000124248, ENSMUST00000013886	Ppp1r12c	protein_coding	cds	AAC	GCT	chr7	-	1725.5	561.5	-181.5	4483366	4483364	15.065	19.2097	18.7974	14.9671	21.2635	23.96	53.0721	60.1906	3	3	0
ENSMUSG00000019302	7377	ENSMUST00000044721, ENSMUST00000103110, ENSMUST00000092663, ENSMUST00000168757	Atp6v0a1	protein_coding	cds	GGA	ATT	chr11	+	2031.25	635.75	-201	101044518	101044520	17.1205	19.0537	28.0001	17.9109	26.1207	18.4055	64.1743	62.437	3	3	0
ENSMUSG00000019370	34086	ENSMUST00000019514	Calm3	protein_coding	cds	GAT	GGG	chr7	-	556	95	-54	16917210	16917386	38.1661	48.023	35.2581	75.7483	84.2398	33.1763	121.447	193.164	3	3	0
ENSMUSG00000019370	34090	ENSMUST00000019514	Calm3	protein_coding	cds	GGG	ACC	chr7	-	454	61	-88	16917488	16917486	28.7507	11.8749	18.538	15.8785	20.3392	30.8749	59.1635	67.0926	3	3	0
ENSMUSG00000019370	34096	ENSMUST00000019514	Calm3	protein_coding	cds	GAT	GGA	chr7	-	337	22	-127	16917697	16917695	68.5236	51.388	55.6712	76.0906	90.022	65.0007	175.583	231.113	3	3	0
ENSMUSG00000019494	31050	ENSMUST00000019638, ENSMUST00000110951, ENSMUST00000132639	Cops6	protein_coding	cds	GGG	GAG	chr5	+	472	141.333	-106.333	138163228	138163230	23.8104	20.7573	33.4461	24.5163	35.4041	20.4192	78.0138	80.3396	3	3	0
ENSMUSG00000019505	5826	ENSMUST00000019649, ENSMUST00000136938	Ubb	protein_coding	cds	CAG	GAT	chr11	+	396.5	30	-240	62552235	62552237	21.6783	25.6551	47.0153	39.1164	40.9069	19.8783	94.3487	99.9016	3	3	0
ENSMUSG00000019505	5827	ENSMUST00000019649, ENSMUST00000136938	Ubb	protein_coding	cds	AGG	CTG	chr11	+	429.5	41	-229	62552268	62552270	62.3713	16.8221	48.2734	23.2189	29.9142	35.7643	127.467	88.8974	3	3	0
ENSMUSG00000019505	5830	ENSMUST00000019649, ENSMUST00000136938	Ubb	protein_coding	cds	GGC	AAG	chr11	+	444.5	46	-224	62552283	62552285	23.3131	19.1749	34.5642	27.8059	30.3239	16.3281	77.0522	74.4578	3	3	0
ENSMUSG00000019505	5831	ENSMUST00000019649, ENSMUST00000136938	Ubb	protein_coding	cds	TCT	GAT	chr11	+	474.5	56	-214	62552313	62552315	25.4205	15.6766	38.8874	24.788	40.0309	37.4232	79.9845	102.242	3	3	0
ENSMUSG00000019505	5835	ENSMUST00000019649, ENSMUST00000136938	Ubb	protein_coding	cds	GTG	AAG	chr11	+	546.5	80	-190	62552385	62552387	116.313	65.6318	139.476	115.325	130.584	150.667	321.421	396.576	3	3	0
ENSMUSG00000019505	5838	ENSMUST00000019649, ENSMUST00000136938	Ubb	protein_coding	cds	AGT	GAC	chr11	+	591.5	95	-175	62552430	62552432	20.7851	20.3111	13.757	25.0799	39.4189	13.3353	54.8532	77.8341	3	3	0
ENSMUSG00000019505	5844	ENSMUST00000019649, ENSMUST00000136938	Ubb	protein_coding	cds	CAG	GAT	chr11	+	624.5	106	-164	62552463	62552465	21.0805	25.9674	47.8308	38.8619	40.3808	19.5391	94.8787	98.7818	3	3	0
ENSMUSG00000019505	5845	ENSMUST00000019649, ENSMUST00000136938	Ubb	protein_coding	cds	AGG	CTG	chr11	+	657.5	117	-153	62552496	62552498	63.5678	15.5862	48.5003	23.5649	30.7822	35.0721	127.654	89.4192	3	3	0
ENSMUSG00000019505	5848	ENSMUST00000019649, ENSMUST00000136938	Ubb	protein_coding	cds	GGC	AAG	chr11	+	672.5	122	-148	62552511	62552513	24.053	19.3552	33.6454	26.5357	31.465	16.8272	77.0536	74.8279	3	3	0
ENSMUSG00000019505	5850	ENSMUST00000019649, ENSMUST00000136938	Ubb	protein_coding	cds	TCT	GAT	chr11	+	702.5	132	-138	62552541	62552543	32.757	14.1412	61.9598	26.336	42.7085	37.445	108.858	106.489	3	3	0
ENSMUSG00000019505	5853	ENSMUST00000019649, ENSMUST00000136938	Ubb	protein_coding	cds	GTG	AAG	chr11	+	774.5	156	-114	62552613	62552615	24.6846	19.2506	35.7054	41.288	50.1311	22.06	79.6406	113.479	3	3	0
ENSMUSG00000019505	5854	ENSMUST00000019649, ENSMUST00000136938	Ubb	protein_coding	cds	AGT	GAC	chr11	+	819.5	171	-99	62552658	62552660	21.2886	20.2413	13.7779	25.7694	40.09	12.6758	55.3079	78.5352	3	3	0
ENSMUSG00000019505	5860	ENSMUST00000019649, ENSMUST00000136938	Ubb	protein_coding	cds	CAG	GAT	chr11	+	852.5	182	-88	62552691	62552693	21.119	26.9213	48.0147	38.8725	41.4599	20.7142	96.0549	101.047	3	3	0
ENSMUSG00000019505	5861	ENSMUST00000019649, ENSMUST00000136938	Ubb	protein_coding	cds	AGG	CTG	chr11	+	885.5	193	-77	62552724	62552726	61.19	15.4146	48.9137	23.3774	30.2335	36.2047	125.518	89.8155	3	3	0
ENSMUSG00000019505	5864	ENSMUST00000019649, ENSMUST00000136938	Ubb	protein_coding	cds	GGC	AAG	chr11	+	900.5	198	-72	62552739	62552741	23.1485	20.0744	33.3981	26.492	30.9163	16.0956	76.621	73.5039	3	3	0
ENSMUSG00000019505	5865	ENSMUST00000019649, ENSMUST00000136938	Ubb	protein_coding	cds	TCT	GAT	chr11	+	930.5	208	-62	62552769	62552771	25.5579	15.8351	38.3452	24.0766	40.5933	38.3202	79.7383	102.99	3	3	0
ENSMUSG00000019505	5872	ENSMUST00000019649	Ubb	protein_coding	cds	GTG	AAG	chr11	+	1127	232	-73	62552841	62552843	116.492	65.4099	136.567	114.602	130.19	150.624	318.469	395.417	3	3	0
ENSMUSG00000019505	5875	ENSMUST00000019649	Ubb	protein_coding	cds	CAG	GAT	chr11	+	1205	258	-47	62552919	62552921	22.3783	26.06	47.8826	42.1416	44.6315	28.4167	96.3208	115.19	3	3	0
ENSMUSG00000019505	5876	ENSMUST00000019649	Ubb	protein_coding	cds	AGG	CTG	chr11	+	1238	269	-36	62552952	62552954	76.8629	26.6195	59.9195	32.4534	43.8991	41.4626	163.402	117.815	3	3	0
ENSMUSG00000019647	18995	ENSMUST00000019791, ENSMUST00000115449	Sema6a	protein_coding	5utr	NA	NA	chr18	-	400	-251	-3307	47368450	47368448	24.6183	19.9809	12.5779	24.1973	28.1184	29.0689	57.177	81.3846	3	3	0
ENSMUSG00000019647	18998	ENSMUST00000019791, ENSMUST00000115449	Sema6a	protein_coding	5utr	NA	NA	chr18	-	46	-605	-3661	47368804	47368802	34.8755	45.2851	18.1393	10.683	24.6013	31.4737	98.2999	66.7579	3	3	0
ENSMUSG00000019647	18999	ENSMUST00000019791, ENSMUST00000115449	Sema6a	protein_coding	5utr	NA	NA	chr18	-	45	-606	-3662	47368805	47368803	28.7876	32.9416	29.2621	40.4145	48.7647	21.5393	90.9913	110.719	3	3	0
ENSMUSG00000019777	2619	ENSMUST00000019911, ENSMUST00000105510	Hdac2	protein_coding	cds	TAT	ATT	chr10	+	711	172	-224	36991775	36991777	12.173	10.4934	13.8953	14.8015	12.0367	15.8349	36.5617	42.673	3	3	0
ENSMUSG00000019795	2445	ENSMUST00000162606, ENSMUST00000159917, ENSMUST00000163085, ENSMUST00000161123	Pcmt1	protein_coding, nonsense_mediated_decay	cds	CTG	AAG	chr10	-	191	38.25	-200	7663169	7663167	11.1737	12.1938	11.2933	11.0851	17.3284	11.4518	34.6608	39.8653	3	3	0
ENSMUSG00000019810	2494	ENSMUST00000060212, ENSMUST00000121465	Fuca2	protein_coding	cds	TGG	CCC	chr10	+	1352	395	-66	13512666	13512668	20.9853	14.1421	28.6629	24.0487	24.6515	27.9464	63.7903	76.6466	3	3	0
ENSMUSG00000019828	2469	ENSMUST00000105561, ENSMUST00000044306, ENSMUST00000105560	Grm1	protein_coding	cds	AGA	GAG	chr10	-	2287.33	627	-376.667	10720002	10720000	11.4723	12.7425	27.995	27.722	13.6866	26.5922	52.2099	68.0009	3	3	0
ENSMUSG00000019828	2473	ENSMUST00000105561, ENSMUST00000044306, ENSMUST00000105560	Grm1	protein_coding	cds	GAT	ATC	chr10	-	1054.33	216	-787.667	11079891	11079889	13.6158	17.4413	11.8246	14.8492	19.5983	20.9438	42.8818	55.3914	3	3	0
ENSMUSG00000019843	2668	ENSMUST00000148152, ENSMUST00000063091, ENSMUST00000099967, ENSMUST00000126486	Fyn	protein_coding	5utr	NA	NA	chr10	+	372.75	-86.5	-1377.25	39395022	39395024	44.3887	32.5472	24.8133	31.4453	39.0968	56.0219	101.749	126.564	3	3	0
ENSMUSG00000019877	2780	ENSMUST00000020027	Serinc1	protein_coding	cds	CGT	GAG	chr10	-	1374	413	-40	57517280	57517278	26.6871	38.9721	38.531	43.3692	44.6383	42.3074	104.19	130.315	3	3	0
ENSMUSG00000019877	2785	ENSMUST00000020027	Serinc1	protein_coding	cds	GGA	ATT	chr10	-	1083	316	-137	57519745	57519743	16.5826	19.6494	28.3831	21.235	21.1839	33.2902	64.615	75.7091	3	3	0
ENSMUSG00000019877	2791	ENSMUST00000020027, ENSMUST00000169122	Serinc1	protein_coding	cds	GCA	GAG	chr10	-	706.5	207.5	-128.5	57523128	57523126	36.5675	38.2181	37.5859	31.9169	38.2993	65.9314	112.372	136.148	3	3	0
ENSMUSG00000019877	2807	ENSMUST00000020027, ENSMUST00000169122, ENSMUST00000170062	Serinc1	protein_coding, nonsense_mediated_decay	cds	GGG	AAC	chr10	-	154	31	-231	57527773	57527771	22.5026	14.4856	24.1133	18.9395	24.0204	21.2607	61.1014	64.2206	3	3	0
ENSMUSG00000019906	4010	ENSMUST00000020057	Lin7a	protein_coding	cds	ATG	GCG	chr10	+	214	13	-220	107324024	107324026	15.6959	25.3855	10.5868	17.0596	22.0439	15.0561	51.6682	54.1596	3	3	0
ENSMUSG00000019923	3061	ENSMUST00000020081, ENSMUST00000105431, ENSMUST00000160337	Zwint	protein_coding	cds	GCG	GAG	chr10	+	67.3333	9	-243	72654945	72654947	48.3482	23.7833	56.2687	38.1581	47.3943	42.3504	128.4	127.903	3	3	0
ENSMUSG00000019923	3073	ENSMUST00000020081, ENSMUST00000105431, ENSMUST00000160337	Zwint	protein_coding	cds	GAC	GGA	chr10	+	610.333	190	-62	72657117	72657119	18.9379	13.2457	28.4089	16.3785	27.9968	26.4145	60.5924	70.7899	3	3	0
ENSMUSG00000019966	3982	ENSMUST00000105283, ENSMUST00000130190, ENSMUST00000020129	Kitl	protein_coding	cds	AAT	GTA	chr10	+	375.333	48.3333	-177.333	100051935	100051937	42.5851	38.8226	64.2618	63.4637	73.3709	53.3394	145.669	190.174	3	3	0
ENSMUSG00000020023	3897	ENSMUST00000065060, ENSMUST00000117460, ENSMUST00000121471, ENSMUST00000117929	Tmcc3	protein_coding	cds	GCG	GAC	chr10	+	892.5	240.75	-213	94579136	94579138	12.9167	11.5579	15.5564	20.7656	13.9175	17.4574	40.0309	52.1405	3	3	0
ENSMUSG00000020053	3762	ENSMUST00000095360	Igf1	protein_coding	5utr	NA	NA	chr10	+	159	-124	-585	87859226	87859228	10.123	17.2918	19.4766	15.7684	27.8486	17.2864	46.8914	60.9035	3	3	0
ENSMUSG00000020149	4847	ENSMUST00000020358, ENSMUST00000109602, ENSMUST00000109601, ENSMUST00000163483	Rab1a	protein_coding	cds	GGA	ATT	chr11	+	486	108.75	-59	20224665	20224667	40.3929	23.1005	35.7754	19.5933	33.5249	46.7276	99.2689	99.8457	3	3	0
ENSMUSG00000020151	4085	ENSMUST00000063470, ENSMUST00000105271	Ptprr	protein_coding	cds	GGA	AAC	chr10	+	665.5	114.5	-488	116162490	116162492	18.7103	12.6202	15.7567	21.505	28.5712	13.1958	47.0872	63.2719	3	3	0
ENSMUSG00000020151	4092	ENSMUST00000063470, ENSMUST00000105271, ENSMUST00000148731, ENSMUST00000155606, ENSMUST00000128399	Ptprr	protein_coding	cds	TGG	CCA	chr10	+	1322.2	335.2	-153	116251126	116251128	10.4583	18.563	20.3526	18.9216	28.6081	28.0146	49.3739	75.5443	3	3	0
ENSMUSG00000020163	3513	ENSMUST00000020372	Uqcr11	protein_coding	cds	CCT	TAC	chr10	-	220	45	-11	80404202	80404200	16.6662	21.6925	23.4165	17.9691	26.9406	22.3935	61.7752	67.3031	3	3	0
ENSMUSG00000020163	3515	ENSMUST00000020372	Uqcr11	protein_coding	cds	TGG	ATT	chr10	-	133	16	-40	80406698	80406696	10.3302	11.4366	22.9855	17.9035	19.9482	10.9733	44.7524	48.8251	3	3	0
ENSMUSG00000020163	3517	ENSMUST00000020372	Uqcr11	protein_coding	cds	CCG	CGC	chr10	-	106	7	-49	80406725	80406723	42.6916	26.0712	28.7057	22.4276	36.4417	59.2024	97.4685	118.072	3	3	0
ENSMUSG00000020189	4044	ENSMUST00000095310	Osbpl8	protein_coding	5utr	NA	NA	chr10	+	414	-135	-2678	111204753	111204755	34.4715	10.6533	31.3222	31.6145	43.8893	30.7107	76.4469	106.215	3	3	0
ENSMUSG00000020189	4048	ENSMUST00000105275	Osbpl8	protein_coding	5utr	NA	NA	chr10	+	464	-46	-2715	111204803	111204805	34.1478	10.5552	31.0842	31.4102	43.4499	30.4132	75.7871	105.273	3	3	0
ENSMUSG00000020235	3660	ENSMUST00000140901, ENSMUST00000020457, ENSMUST00000118812	Fzr1	protein_coding, nonsense_mediated_decay	cds	CGT	GAC	chr10	-	945.333	258.333	-161	81369218	81369216	11.98	14.8998	22.6082	11.575	13.1403	26.0773	49.488	50.7926	3	3	0
ENSMUSG00000020257	41176	ENSMUST00000020490	Wdr82	protein_coding	5utr	NA	NA	chr9	+	23	-269	-1210	106170950	106170952	12.0849	18.5705	12.7139	14.0785	13.7102	16.9789	43.3693	44.7677	3	3	0
ENSMUSG00000020262	3216	ENSMUST00000020496, ENSMUST00000098374, ENSMUST00000105404, ENSMUST00000144547, ENSMUST00000105406, ENSMUST00000126073	Adarb1	protein_coding, nonsense_mediated_decay	5utr	NA	NA	chr10	-	274.167	-117	-1281.5	77359636	77359634	17.5935	18.1432	26.9541	24.7284	21.8916	40.2716	62.6907	86.8916	3	3	0
ENSMUSG00000020267	5521	ENSMUST00000020504	Hint1	protein_coding	cds	GGT	CGG	chr11	+	458	117	-9	54870323	54870325	12.546	13.5296	13.4424	15.6633	19.005	23.0758	39.518	57.7441	3	3	0
ENSMUSG00000020315	4993	ENSMUST00000006629, ENSMUST00000102838, ENSMUST00000124231, ENSMUST00000011877	Sptbn1	protein_coding	cds	CGT	GAA	chr11	-	6363	2038.75	-204	30110843	30110841	15.8785	13.2299	12.5008	17.2375	32.0688	19.9951	41.6092	69.3013	3	3	0
ENSMUSG00000020321	4863	ENSMUST00000102874	Mdh1	protein_coding	cds	TTT	GGA	chr11	-	1235	258	-76	21559207	21559205	23.3144	26.5969	29.146	37.3095	47.3786	28.0145	79.0573	112.703	3	3	0
ENSMUSG00000020321	4865	ENSMUST00000102874	Mdh1	protein_coding	cds	GGA	GAG	chr11	-	1121	220	-114	21559714	21559712	17.3229	15.5532	15.986	30.7514	32.0984	25.4154	48.862	88.2652	3	3	0
ENSMUSG00000020321	4868	ENSMUST00000102874	Mdh1	protein_coding	cds	GGT	GTA	chr11	-	974	171	-163	21559861	21559859	13.1494	34.5117	14.1737	57.1399	68.5249	20.249	61.8348	145.914	3	3	0
ENSMUSG00000020321	4869	ENSMUST00000102874	Mdh1	protein_coding	cds	GAC	CAC	chr11	-	935	158	-176	21562889	21562887	11.7542	20.2392	29.8842	21.2809	25.9784	19.9275	61.8777	67.1868	3	3	0
ENSMUSG00000020333	5495	ENSMUST00000072178, ENSMUST00000101211, ENSMUST00000101213, ENSMUST00000108899	Acsl6	protein_coding	5utr	NA	NA	chr11	+	166	-224	-2112.25	54315104	54315106	89.2391	34.3822	54.5831	15.4262	32.8097	77.8771	178.204	126.113	3	3	0
ENSMUSG00000020333	5500	ENSMUST00000108904, ENSMUST00000093106, ENSMUST00000072178, ENSMUST00000101211, ENSMUST00000000145, ENSMUST00000101213, ENSMUST00000108905, ENSMUST00000094194	Acsl6	protein_coding	cds	GGG	GAC	chr11	+	1991.75	585.875	-108	54350686	54350688	11.2914	11.424	10.8551	14.0254	12.4791	15.5603	33.5706	42.0648	3	3	0
ENSMUSG00000020366	5254	ENSMUST00000102778, ENSMUST00000043321, ENSMUST00000109179, ENSMUST00000020634, ENSMUST00000109178, ENSMUST00000178543, ENSMUST00000164643	Mapk9	protein_coding	cds	GGA	ATC	chr11	+	964.714	267	-132	49878343	49878345	10.0534	10.709	10.3142	15.2205	15.6683	16.3431	31.0766	47.2319	3	3	0
ENSMUSG00000020368	5297	ENSMUST00000020637, ENSMUST00000179865	Canx	protein_coding	cds	CGT	GAA	chr11	-	1008	274	-317	50304418	50304416	25.4052	17.9155	23.3719	10.7018	14.483	30.805	66.6926	55.9898	3	3	0
ENSMUSG00000020372	5228	ENSMUST00000020640	Rack1	protein_coding	cds	GGC	ATA	chr11	+	260	52	-265	48801709	48801711	12.6287	16.5978	13.9979	14.5648	21.1675	19.2609	43.2244	54.9932	3	3	0
ENSMUSG00000020372	5235	ENSMUST00000020640	Rack1	protein_coding	cds	GCA	GAG	chr11	+	944	280	-37	48805607	48805609	16.3162	13.5525	33.1765	13.8121	16.6259	23	63.0453	53.4381	3	3	0
ENSMUSG00000020402	5437	ENSMUST00000102758, ENSMUST00000125694, ENSMUST00000020673	Vdac1	protein_coding, nonsense_mediated_decay	cds	GGC	AAG	chr11	+	148.667	14.3333	-263.333	52374331	52374333	30.5761	12.7357	19.3368	15.5947	26.2572	26.4097	62.6486	68.2617	3	3	0
ENSMUSG00000020440	31656	ENSMUST00000020717, ENSMUST00000169841	Arf5	protein_coding	cds	GGC	AAG	chr6	+	167	28	-152	28424306	28424308	17.9961	13.7669	27.4871	16.8547	17.6349	16.9028	59.2501	51.3924	3	3	0
ENSMUSG00000020456	4697	ENSMUST00000003461, ENSMUST00000093350, ENSMUST00000081894, ENSMUST00000101554	Ogdh	protein_coding	cds	TGG	CCA	chr11	+	2224.5	707.75	-317	6349166	6349168	19.6354	16.4588	36.6044	17.8218	21.4537	22.7108	72.6986	61.9863	3	3	0
ENSMUSG00000020483	6849	ENSMUST00000020775, ENSMUST00000146941, ENSMUST00000107923, ENSMUST00000178105	Dynll2	protein_coding, nonsense_mediated_decay	cds	GCA	GAC	chr11	-	203.25	10	-70	87983974	87983972	23.7531	15.2093	29.2573	18.9864	19.8008	12.8279	68.2197	51.6151	3	3	0
ENSMUSG00000020484	4649	ENSMUST00000063084, ENSMUST00000149623, ENSMUST00000149159	Xbp1	protein_coding	cds, 3utr	ATG, NA	AAC, NA	chr11	+	923.333	436.667	149.333	5524862	5524864	39.7709	38.2259	71.6869	31.8401	47.397	55.0691	149.684	134.306	3	3	0
ENSMUSG00000020484	4650	ENSMUST00000149159	Xbp1	protein_coding	3utr	NA	NA	chr11	+	857	856	475	5524863	5524865	38.1424	22	63.8477	27.7177	20.4777	66.6656	123.99	114.861	3	3	0
ENSMUSG00000020486	6817	ENSMUST00000133202, ENSMUST00000107962, ENSMUST00000018544, ENSMUST00000107960	Septin4	protein_coding	cds	CCA	GGA	chr11	+	201.5	33.75	-378	87583380	87583382	10.1036	10.3037	14.1295	16.5355	12.0934	18.2831	34.5369	46.912	3	3	0
ENSMUSG00000020496	5642	ENSMUST00000094151	Rnf187	protein_coding	cds	GCA	GAT	chr11	-	756	208	-28	58934091	58934089	24.801	15.668	34.7436	18.9362	20.8579	18.3588	75.2126	58.1529	3	3	0
ENSMUSG00000020496	5651	ENSMUST00000094151	Rnf187	protein_coding	cds	GGG	GAT	chr11	-	432	100	-136	58938485	58938483	14.451	23.1948	27.9274	28.6045	34.58	17.9195	65.5732	81.1039	3	3	0
ENSMUSG00000020524	5623	ENSMUST00000094179, ENSMUST00000151045, ENSMUST00000036315	Gria1	protein_coding	cds	TCC	ATT	chr11	+	2782	866	-18	57327589	57327591	12.1414	10.3105	15.1867	11.7834	16.271	16.2017	37.6385	44.2561	3	3	0
ENSMUSG00000020570	8516	ENSMUST00000076698, ENSMUST00000020885, ENSMUST00000122861	Sypl	protein_coding, nonsense_mediated_decay	cds	AAC	CCG	chr12	+	118	14	-180.333	32954314	32954316	13.5913	13.8032	20.5379	10.7545	12.4419	17.0951	47.9323	40.2915	3	3	0
ENSMUSG00000020572	8513	ENSMUST00000020886	Nampt	protein_coding	cds	GCG	GGA	chr12	+	898	220.5	-270	32839207	32839209	26.7556	13.4281	44.4186	17.8684	20.1349	15.6565	84.6023	53.6598	3	3	0
ENSMUSG00000020577	8535	ENSMUST00000020896	Tspan13	protein_coding	cds	GGG	ATT	chr12	-	260	28	-176	36024052	36024050	12.6123	15.7482	15.4695	12.3941	17.0055	17.5347	43.83	46.9343	3	3	0
ENSMUSG00000020585	8306	ENSMUST00000020909	Laptm4a	protein_coding	cds	GAT	CAG	chr12	+	943	216	-92	8934979	8934981	17.6287	13.3538	24.6423	16.5912	18.7099	19.1146	55.6249	54.4158	3	3	0
ENSMUSG00000020607	8346	ENSMUST00000020926	Lratd1	protein_coding	5utr	NA	NA	chr12	-	177	-93	-971	14151862	14151860	19.9857	10.0995	25.6837	29.5501	25.6851	22.3048	55.7689	77.54	3	3	0
ENSMUSG00000020644	8446	ENSMUST00000020974	Id2	protein_coding	cds	AAT	GAT	chr12	-	460	126	-8	25095345	25095343	20.4235	17.1732	23.5424	21.6097	32.7898	22.162	61.1391	76.5615	3	3	0
ENSMUSG00000020644	8450	ENSMUST00000020974	Id2	protein_coding	cds	GGA	CAG	chr12	-	361	93	-41	25095732	25095730	17.0126	14.9121	20.2341	18.4373	26.0568	25.7306	52.1588	70.2247	3	3	0
ENSMUSG00000020719	7669	ENSMUST00000021062, ENSMUST00000133426	Ddx5	protein_coding, nonsense_mediated_decay	cds	GGC	ATC	chr11	-	1304	369	-141.5	106784150	106784148	18.5665	10.9967	13.1166	14.4255	14.6647	19.3906	42.6799	48.4808	3	3	0
ENSMUSG00000020719	7673	ENSMUST00000021062, ENSMUST00000133426	Ddx5	protein_coding, nonsense_mediated_decay	cds	GAA	AAG	chr11	-	1175	326	-184.5	106784885	106784883	13.6898	13.6755	17.9487	14.9497	14.5005	10.5755	45.314	40.0257	3	3	0
ENSMUSG00000020719	7680	ENSMUST00000021062, ENSMUST00000133426	Ddx5	protein_coding, nonsense_mediated_decay	cds	GGA	CCA	chr11	-	818	207	-303.5	106785423	106785421	19.3222	25.1297	17.5149	22.3379	19.6322	19.739	61.9668	61.7092	3	3	0
ENSMUSG00000020719	7686	ENSMUST00000127481, ENSMUST00000021062, ENSMUST00000133426, ENSMUST00000129585, ENSMUST00000123339	Ddx5	nonsense_mediated_decay, protein_coding	cds	CCT	GAT	chr11	-	427.4	62	-226.2	106786933	106786931	15.2127	16.1601	10.4243	24.5979	34.5433	25.7766	41.7972	84.9179	3	3	0
ENSMUSG00000020738	7821	ENSMUST00000121185, ENSMUST00000117589, ENSMUST00000153892	Sumo2	protein_coding	cds	CAG	CCA	chr11	-	282	35.3333	-31	115530379	115530377	12.6512	13.0925	11.5098	12.3391	13.166	14.2899	37.2536	39.795	3	3	0
ENSMUSG00000020745	6303	ENSMUST00000021091, ENSMUST00000102520	Pafah1b1	protein_coding	cds	GGA	GAT	chr11	-	1452.5	203	-207	74684468	74684466	15.1403	15.2663	31.7865	17.0557	18.8723	18.5027	62.1932	54.4308	3	3	0
ENSMUSG00000020788	6266	ENSMUST00000108486, ENSMUST00000108484, ENSMUST00000163326, ENSMUST00000108485, ENSMUST00000021142	Atp2a3	protein_coding	cds	AGA	GAG	chr11	+	1808	541	-471.8	72980204	72980206	13.8265	18.4015	18.6237	24.9146	25.3498	11.3333	50.8518	61.5978	3	3	0
ENSMUSG00000020788	6271	ENSMUST00000108486, ENSMUST00000108484, ENSMUST00000163326, ENSMUST00000108485, ENSMUST00000021142	Atp2a3	protein_coding	cds	AAT	GAG	chr11	+	2245.4	686.8	-326	72980756	72980758	11.4309	21.7223	14.7939	20.3701	27.7492	35.1653	47.9471	83.2847	3	3	0
ENSMUSG00000020849	6361	ENSMUST00000067664, ENSMUST00000134745	Ywhae	protein_coding, nonsense_mediated_decay	cds	GCG	AAG	chr11	+	167	10	-182.5	75733057	75733059	31.7925	47.181	47.8964	53.402	59.7952	25.1772	126.87	138.374	3	3	0
ENSMUSG00000020849	6367	ENSMUST00000131398	Ywhae	protein_coding	cds	GTT	AAT	chr11	+	315	105	-48	75755590	75755592	25.8047	14.7009	34.3427	23.0154	27.2383	29.0322	74.8483	79.2859	3	3	0
ENSMUSG00000020849	6368	ENSMUST00000067664, ENSMUST00000134745	Ywhae	protein_coding, nonsense_mediated_decay	cds	TTA	ATC	chr11	+	419	94	-98.5	75755591	75755593	33.1134	14.1993	32.9948	21.6608	21.27	35.6728	80.3075	78.6037	3	3	0
ENSMUSG00000020849	6374	ENSMUST00000131398	Ywhae	protein_coding	cds	TGG	CGA	chr11	+	375	125	-28	75755650	75755652	28.7583	23.5009	33.9393	29.1358	26.6395	40.5579	86.1985	96.3332	3	3	0
ENSMUSG00000020849	6375	ENSMUST00000067664	Ywhae	protein_coding	cds	GGC	GAG	chr11	+	501	114	-141	75755651	75755653	24.9355	17.383	26.5272	26.6717	24.0365	37.3187	68.8456	88.027	3	3	0
ENSMUSG00000020849	6384	ENSMUST00000067664	Ywhae	protein_coding	cds	AGT	GAC	chr11	+	624	155	-100	75756910	75756912	25.6169	13.7751	52.7668	20.3575	24.1214	25.6105	92.1589	70.0895	3	3	0
ENSMUSG00000020849	6388	ENSMUST00000067664	Ywhae	protein_coding	cds	TAT	GAA	chr11	+	702	181	-74	75756988	75756990	18.3212	10.7811	31.5625	14.445	17.2463	25.3651	60.6648	57.0564	3	3	0
ENSMUSG00000020857	6914	ENSMUST00000021217, ENSMUST00000072566	Nme2	protein_coding	cds	CAG	AAG	chr11	-	387.5	29	-123	93955534	93955532	19.8227	19.3278	30.094	19.165	26.7637	23.2145	69.2445	69.1432	3	3	0
ENSMUSG00000020886	6125	ENSMUST00000108588	Dlg4	protein_coding	5utr	NA	NA	chr11	+	234	-243	-2417	70018699	70018701	21.2087	15.7501	30.1333	14.6546	16.5888	19.6006	67.0921	50.8439	3	3	0
ENSMUSG00000020949	8779	ENSMUST00000021332	Fkbp3	protein_coding	cds	CCA	GAT	chr12	-	502	139	-85	65065779	65065777	20.3769	10.0912	20.1113	11.9586	22.3853	17.7505	50.5793	52.0944	3	3	0
ENSMUSG00000020949	8783	ENSMUST00000021332	Fkbp3	protein_coding	cds	GAC	ATT	chr12	-	154	23	-201	65070029	65070027	13.8385	10.4009	20.2696	11.7506	17.9888	14.546	44.5089	44.2854	3	3	0
ENSMUSG00000020978	8810	ENSMUST00000021362	Klhdc2	protein_coding	cds	AAT	GAA	chr12	+	1185	304	-102	69307646	69307648	17.9629	15.0593	37.3436	22.3739	18.5363	24.5826	70.3659	65.4928	3	3	0
ENSMUSG00000021076	8846	ENSMUST00000021479	Actr10	protein_coding	cds	GGA	ATT	chr12	+	491	131	-286	70947502	70947504	23.8293	19.0919	52.1757	23.1645	27.3829	37.6898	95.0968	88.2372	3	3	0
ENSMUSG00000021087	8880	ENSMUST00000078505, ENSMUST00000137990, ENSMUST00000021497	Rtn1	protein_coding	cds	GCC	AAG	chr12	-	1435.67	407.667	-6	72212556	72212554	17.2729	14.3827	15.2595	13.3975	13.8646	26.8269	46.9152	54.089	3	3	0
ENSMUSG00000021087	8898	ENSMUST00000078505, ENSMUST00000137990, ENSMUST00000021497	Rtn1	protein_coding	cds	CGG	GAC	chr12	-	910.667	232.667	-181	72223520	72223518	14.8616	15.9327	20.8506	10.4289	14.6212	16.4361	51.645	41.4862	3	3	0
ENSMUSG00000021087	8900	ENSMUST00000078505, ENSMUST00000137990, ENSMUST00000021497	Rtn1	protein_coding	cds	TAC	TGG	chr12	-	904.667	230.667	-183	72223526	72223524	35.1583	12.3552	38.3023	17.7808	26.2337	34.3551	85.8159	78.3696	3	3	0
ENSMUSG00000021087	8911	ENSMUST00000078505	Rtn1	protein_coding	cds	TAT	GAA	chr12	-	1604	367	-413	72304333	72304331	12.3177	12.2197	11.6027	20.3256	27.0241	17.255	36.1402	64.6047	3	3	0
ENSMUSG00000021102	9384	ENSMUST00000021522	Glrx5	protein_coding	cds	GGT	ATT	chr12	+	292	94	-58	105032980	105032982	14.8042	22.5787	30.5713	28.1478	37.0958	15.7927	67.9543	81.0362	3	3	0
ENSMUSG00000021102	9385	ENSMUST00000021522	Glrx5	protein_coding	cds	GGT	ATC	chr12	+	421	137	-15	105040401	105040403	14.8042	10.052	17.8016	14.8483	15.9915	20.3337	42.6578	51.1735	3	3	0
ENSMUSG00000021113	8929	ENSMUST00000021532	Snapc1	protein_coding	cds	AAT	GAT	chr12	+	585	183	-206	73969593	73969595	23.5702	17.1938	44.6868	11.2268	13.2906	28.3432	85.4509	52.8607	3	3	0
ENSMUSG00000021144	9646	ENSMUST00000009099, ENSMUST00000109723, ENSMUST00000069690, ENSMUST00000109726, ENSMUST00000109727	Mta1	protein_coding	cds	CAG	AAG	chr12	+	578.6	149.2	-554.2	113123152	113123154	13.771	19.3047	18.5203	15.065	19.6652	16.5	51.596	51.2301	3	3	0
ENSMUSG00000021156	9712	ENSMUST00000110634	Zmynd11	protein_coding	5utr	NA	NA	chr13	-	84	-165	-1973	9764873	9764871	49.1994	23.5541	77.6536	18.3052	31.249	41.8338	150.407	91.388	3	3	0
ENSMUSG00000021190	9332	ENSMUST00000110020, ENSMUST00000021607	Lgmn	protein_coding	cds	TAT	GAA	chr12	-	650.5	174.5	-260	102402694	102402692	21.3587	13.4263	18.1331	16.3619	10.9989	20.9762	52.9181	48.337	3	3	0
ENSMUSG00000021190	9334	ENSMUST00000110020, ENSMUST00000021607	Lgmn	protein_coding	cds	TAT	AAT	chr12	-	251.5	42	-393	102423603	102423601	19.0906	11.1014	22.7774	14.8245	16.8611	19.1162	52.9694	50.8017	3	3	0
ENSMUSG00000021194	9344	ENSMUST00000021610	Chga	protein_coding	cds	GGG	GAG	chr12	+	1062	302	-161	102562671	102562673	12.8498	15.9085	19.1575	13.6817	16.5852	13.9604	47.9159	44.2273	3	3	0
ENSMUSG00000021218	9668	ENSMUST00000059515	Gdi2	protein_coding	cds	GGC	AAG	chr13	+	1099	310	-99	3561921	3561923	19.0751	16.6361	20.082	23.6714	30.6691	22.4836	55.7932	76.824	3	3	0
ENSMUSG00000021252	9138	ENSMUST00000021676, ENSMUST00000142331	Erg28	protein_coding	cds	CGA	GAC	chr12	-	243	27	-70	85822140	85822138	11.2966	12.0867	20.1506	12.7072	10.5301	13	43.5339	36.2373	3	3	0
ENSMUSG00000021256	9151	ENSMUST00000021681	Vash1	protein_coding	5utr	NA	NA	chr12	+	298	-991	-2118	86678997	86678999	27.8129	14.633	35.9416	23.9686	26.3114	24.8014	78.3874	75.0814	3	3	0
ENSMUSG00000021270	9475	ENSMUST00000094361, ENSMUST00000021698	Hsp90aa1	protein_coding	cds	GGA	ATT	chr12	-	1485	448	-285	110693165	110693163	29.4884	13.7162	25.2977	25.4452	33.1386	26.5475	68.5023	85.1312	3	3	0
ENSMUSG00000021270	9479	ENSMUST00000094361, ENSMUST00000021698	Hsp90aa1	protein_coding	cds	CGT	GAA	chr12	-	1341	400	-333	110693453	110693451	19.8891	15.5099	23.9942	16.3721	18.3527	20.3955	59.3932	55.1203	3	3	0
ENSMUSG00000021427	10618	ENSMUST00000021864	Ssr1	protein_coding	cds	GGA	GGA	chr13	-	626	164	-122	37987541	37987539	14.4347	12.7553	25.8186	18.5527	12.9941	17.9828	53.0087	49.5296	3	3	0
ENSMUSG00000021427	10619	ENSMUST00000021864	Ssr1	protein_coding	cds	GAA	GAT	chr13	-	470	112	-174	37987697	37987695	19.6502	11.4712	17.2392	12.1622	21.5383	20.9245	48.3607	54.625	3	3	0
ENSMUSG00000021451	10733	ENSMUST00000021900, ENSMUST00000110040	Sema4d	protein_coding	5utr	NA	NA	chr13	-	260	-269	-2854	51763275	51763273	19.9252	22.2813	24.2588	16.2003	32.8113	35.7738	66.4654	84.7855	3	3	0
ENSMUSG00000021451	10738	ENSMUST00000110040, ENSMUST00000021900	Sema4d	protein_coding	5utr	NA	NA	chr13	-	102	-427	-3012	51793609	51793607	21.703	23.7856	26.9626	14.7364	35.0087	16.1517	72.4512	65.8969	3	3	0
ENSMUSG00000021476	11005	ENSMUST00000021929	Habp4	protein_coding	5utr	NA	NA	chr13	+	46	-72	-1310	64161911	64161913	12.7783	18.7667	12.0367	16.2833	22.4045	12.3418	43.5817	51.0296	3	3	0
ENSMUSG00000021476	11011	ENSMUST00000021929	Habp4	protein_coding	cds	AAT	GAT	chr13	+	780	221	-191	64174210	64174212	11.9477	10.6066	37.0626	12.5078	26.7013	20.5412	59.6169	59.7503	3	3	0
ENSMUSG00000021477	11014	ENSMUST00000021933	Ctsl	protein_coding	cds	TGT	GGA	chr13	-	1045	321	-13	64364140	64364138	19.8657	17.6674	29.7411	15.7737	18.0603	14.665	67.2742	48.499	3	3	0
ENSMUSG00000021546	10943	ENSMUST00000116403, ENSMUST00000177497, ENSMUST00000177019, ENSMUST00000043269, ENSMUST00000176207, ENSMUST00000176849	Hnrnpk	protein_coding	cds	GGA	GAT	chr13	-	1072.67	293.5	-122.833	58394480	58394478	22.0735	14.0632	11.9103	14.7886	16.2331	17.8883	48.047	48.91	3	3	0
ENSMUSG00000021546	10944	ENSMUST00000176797	Hnrnpk	protein_coding	cds	GGG	AGA	chr13	-	339	112.5	-96.5	58394481	58394479	22.0915	13.4295	10.8362	16.7795	16.6327	14.1073	46.3571	47.5195	3	3	0
ENSMUSG00000021577	11124	ENSMUST00000022062	Sdha	protein_coding	cds	CCT	GAG	chr13	-	1146	358	-306	74332285	74332283	12.4036	12.8631	16.1698	13.1993	11.6644	10.5498	41.4365	35.4135	3	3	0
ENSMUSG00000021577	11128	ENSMUST00000022062	Sdha	protein_coding	cds	TAT	GGA	chr13	-	684	203.5	-460	74339056	74339054	13.4405	11.9575	13.5351	15.603	15.4301	14.8417	38.9331	45.8749	3	3	0
ENSMUSG00000021660	11296	ENSMUST00000022163, ENSMUST00000152704, ENSMUST00000134542	Btf3	protein_coding	cds	GCA	GAC	chr13	-	520.333	125	-51	98313144	98313142	15.1465	14.8317	11.216	15.0635	27.9676	17.7483	41.1943	60.7794	3	3	0
ENSMUSG00000021660	11298	ENSMUST00000022163, ENSMUST00000152704, ENSMUST00000134542	Btf3	protein_coding	cds	GCT	GAG	chr13	-	466.333	107	-69	98313198	98313196	21.9278	17.9392	30.0878	22.995	23.575	33.5677	69.9548	80.1377	3	3	0
ENSMUSG00000021670	11266	ENSMUST00000022176, ENSMUST00000170287	Hmgcr	protein_coding	cds	GCG	GAG	chr13	-	936	283	-570	96659309	96659307	16.4153	20.3564	21.7824	20.4777	20.0921	15.2998	58.5541	55.8696	3	3	0
ENSMUSG00000021719	11377	ENSMUST00000063551	Rgs7bp	protein_coding	5utr	NA	NA	chr13	-	342	-375	-1148	105054589	105054587	12.721	25.8341	12.405	20.3893	22.6924	12.0182	50.9601	55.0999	3	3	0
ENSMUSG00000021756	11442	ENSMUST00000184311, ENSMUST00000184445, ENSMUST00000183663, ENSMUST00000183886, ENSMUST00000184276, ENSMUST00000070731, ENSMUST00000184949	Il6st	protein_coding, nonsense_mediated_decay	cds	GGA	AGG	chr13	+	608.143	148	-486.857	112481497	112481499	13.4935	11.9134	23.0801	10.4898	11.7482	15.1938	48.487	37.4318	3	3	0
ENSMUSG00000021832	12059	ENSMUST00000022380	Psmc6	protein_coding	cds	GAT	ATA	chr14	+	990	310	-79	45343714	45343716	17.671	18.0312	38.1629	11.3739	14.8841	18.5419	73.8651	44.7999	3	3	0
ENSMUSG00000021832	12060	ENSMUST00000022380	Psmc6	protein_coding	cds	TCC	AAG	chr14	+	1203	381	-8	45348710	45348712	19.4647	11.8076	32.699	15.1307	15.6092	23.3871	63.9712	54.1271	3	3	0
ENSMUSG00000021867	11836	ENSMUST00000022418, ENSMUST00000183976	Tmem254b	protein_coding, nonsense_mediated_decay	5utr	NA	NA	chr14	-	58.5	-216	-498.5	26206969	26206967	17.9681	20.2402	23.255	10.0613	12.7739	18.2026	61.4634	41.0379	3	3	0
ENSMUSG00000021910	11906	ENSMUST00000168206	Nisch	protein_coding	5utr	NA	NA	chr14	-	63	-243	-4289	31191468	31191466	14.7456	10.2919	33.6588	17.7376	19.3529	13.5912	58.6963	50.6817	3	3	0
ENSMUSG00000021910	11907	ENSMUST00000022469, ENSMUST00000172142, ENSMUST00000165981, ENSMUST00000164989	Nisch	protein_coding, nonsense_mediated_decay	cds	GGA	AAG	chr14	-	586.75	164	-564.75	31191469	31191467	13.7297	10.8547	28.3765	18.4403	23.3005	15.1307	52.9608	56.8716	3	3	0
ENSMUSG00000021939	12436	ENSMUST00000006235	Ctsb	protein_coding	cds	GCA	CTG	chr14	+	165	12	-327	63133376	63133378	17.4286	15.7824	27.9402	18.2963	19.743	32.6653	61.1511	70.7046	3	3	0
ENSMUSG00000021939	12451	ENSMUST00000006235	Ctsb	protein_coding	cds	GGA	GAT	chr14	+	732	201	-138	63138421	63138423	18.6535	20.2549	29.928	41.2511	40.9554	13.0598	68.8363	95.2663	3	3	0
ENSMUSG00000021963	12381	ENSMUST00000128764, ENSMUST00000143600, ENSMUST00000111268, ENSMUST00000111267	Sap18	protein_coding	cds	GAT	GAC	chr14	+	344.25	79.75	-37	57801964	57801966	16.6752	12.7701	12.5113	10.9153	18.7453	13.0613	41.9567	42.722	3	3	0
ENSMUSG00000021986	12418	ENSMUST00000022561	Amer2	protein_coding	cds	ATG	GAC	chr14	+	666	37	-635	60378951	60378953	25.47	20.5333	28.724	36.3624	25.4912	12.3299	74.7273	74.1835	3	3	0
ENSMUSG00000021991	11854	ENSMUST00000022567	Cacna2d3	protein_coding	cds	GCA	GGA	chr14	-	2428	777	-314	29045586	29045584	23.5456	16.3633	28.724	20.7846	11.5833	24.6667	68.6329	57.0346	3	3	0
ENSMUSG00000022010	12764	ENSMUST00000022587, ENSMUST00000134109	Tsc22d1	protein_coding	cds	ATG	GAT	chr14	+	243	10	-102.5	76504746	76504748	53.361	36.0716	64.7686	18.6133	21.8813	89.1619	154.201	129.656	3	3	0
ENSMUSG00000022048	12539	ENSMUST00000022629	Dpysl2	protein_coding	cds	GGA	GAC	chr14	-	1289	323	-249	66815096	66815094	15.1154	14.0083	19.27	25.221	26.739	10.4922	48.3937	62.4522	3	3	0
ENSMUSG00000022048	12544	ENSMUST00000022629	Dpysl2	protein_coding	cds	CAG	GGA	chr14	-	560	80	-492	66862546	66862544	14.3759	11.1063	31.8518	12.6812	16.843	14.2531	57.3341	43.7774	3	3	0
ENSMUSG00000022055	12567	ENSMUST00000022639	Nefl	protein_coding	cds	GCG	CGC	chr14	+	205	35	-508	68084067	68084069	15.0719	22.8975	54.2546	34.2402	36.0544	25.9678	92.2241	96.2625	3	3	0
ENSMUSG00000022055	12577	ENSMUST00000022639	Nefl	protein_coding	cds	GAC	ATC	chr14	+	880	260	-283	68084742	68084744	14.4824	10.6571	28.5909	13.3755	19.7821	10.3212	53.7304	43.4788	3	3	0
ENSMUSG00000022108	12659	ENSMUST00000022704	Itm2b	protein_coding	cds	TTT	GAG	chr14	-	922	253	-13	73363082	73363080	21.4523	16.4282	29.5135	10.9071	14.0257	16.0297	67.3941	40.9625	3	3	0
ENSMUSG00000022108	12662	ENSMUST00000022704	Itm2b	protein_coding	cds	GAC	AAG	chr14	-	835	224	-42	73364567	73364565	40.2176	44.8576	67.6397	48.192	52.7469	53.9646	152.715	154.903	3	3	0
ENSMUSG00000022108	12686	ENSMUST00000022704	Itm2b	protein_coding	cds	GAG	CCT	chr14	-	466	101	-165	73366453	73366451	47.7066	65.2895	85.9252	61.6853	82.4026	49.8852	198.921	193.973	3	3	0
ENSMUSG00000022108	12693	ENSMUST00000022704	Itm2b	protein_coding	cds	TTC	ATG	chr14	-	349	62	-204	73368341	73368339	21.8466	20.9599	36.75	18.7978	20.5477	38.5508	79.5565	77.8964	3	3	0
ENSMUSG00000022110	12714	ENSMUST00000022706, ENSMUST00000160507	Sucla2	protein_coding	cds	GGA	ATA	chr14	+	1259.5	389	-74	73592691	73592693	17.7752	13.041	20.8558	13.3735	16.0438	19.2504	51.6719	48.6677	3	3	0
ENSMUSG00000022186	13061	ENSMUST00000110690, ENSMUST00000138927	Oxct1	protein_coding	cds	GAT	GGC	chr15	+	766.5	176	-327	4053828	4053830	30.0149	19.4159	44.9149	25.8851	35.9041	36.417	94.3457	98.2062	3	3	0
ENSMUSG00000022186	13077	ENSMUST00000110690, ENSMUST00000138927	Oxct1	protein_coding	cds	CAG	ATT	chr15	+	1735.5	499	-4	4153754	4153756	29.7079	27.1216	50.5409	41.5036	41.5901	29.2704	107.37	112.364	3	3	0
ENSMUSG00000022199	12269	ENSMUST00000050772	Slc22a17	protein_coding	5utr	NA	NA	chr14	-	171	-574	-1779	54912962	54912960	99.6852	61.8828	62.5934	30.5019	51.958	102.812	224.161	185.272	3	3	0
ENSMUSG00000022199	12270	ENSMUST00000050772	Slc22a17	protein_coding	5utr	NA	NA	chr14	-	170	-575	-1780	54912963	54912961	29.4879	52.6559	50.0757	80.7994	77.898	29.2253	132.22	187.923	3	3	0
ENSMUSG00000022200	13173	ENSMUST00000059680	Golph3	protein_coding	5utr	NA	NA	chr15	+	142	-141	-1037	12321637	12321639	22.4895	16.2318	25.8582	10.6053	17.2927	20.5742	64.5795	48.4722	3	3	0
ENSMUSG00000022205	13148	ENSMUST00000022816, ENSMUST00000110504	Sub1	protein_coding	cds	GGT	ATT	chr15	-	414.5	101	-26	11984297	11986456	30.914	21.0443	35.7701	22.9315	30.6106	24.521	87.7285	78.063	3	3	0
ENSMUSG00000022205	13152	ENSMUST00000022816, ENSMUST00000110504	Sub1	protein_coding	cds	GGA	AAG	chr15	-	309.5	66	-61	11986562	11986560	20.5847	16.3009	20.1505	21.3991	22.8256	17.9134	57.0361	62.1381	3	3	0
ENSMUSG00000022205	13153	ENSMUST00000022816, ENSMUST00000110504	Sub1	protein_coding	cds	GGT	GAG	chr15	-	237.5	42	-85	11991028	11991026	15.2846	11.0722	14.487	14.638	20.2698	10.3398	40.8438	45.2476	3	3	0
ENSMUSG00000022205	13154	ENSMUST00000022816, ENSMUST00000110504	Sub1	protein_coding	cds	CTT	GTT	chr15	-	129.5	6	-121	11993843	11993841	19.8618	12.4002	18.8307	15.8106	16.0947	20.5038	51.0927	52.4091	3	3	0
ENSMUSG00000022208	12290	ENSMUST00000022819	Jph4	protein_coding	5utr	NA	NA	chr14	-	686	-431	-2317	55116250	55116248	29.6366	16.2184	28.325	19.4809	17.1616	29.1699	74.18	65.8124	3	3	0
ENSMUSG00000022234	13266	ENSMUST00000022842	Cct5	protein_coding	cds	GTG	AAG	chr15	-	1542	481	-60	31592383	31592381	16.2574	10.4658	28.7409	11.1427	10.4528	10.3445	55.4642	31.94	3	3	0
ENSMUSG00000022234	13268	ENSMUST00000022842	Cct5	protein_coding	cds	GGA	GGA	chr15	-	1110	337	-204	31593540	31593538	10.3168	15.8621	43.2849	20.8347	19.553	10.3445	69.4637	50.7323	3	3	0
ENSMUSG00000022253	13136	ENSMUST00000067760, ENSMUST00000100789, ENSMUST00000100790	Nadk2	protein_coding	cds	AAT	GTA	chr15	+	566	108	-319.667	9083329	9083331	21.362	26.8691	40.5	17.8897	22.5167	31.6689	88.731	72.0752	3	3	0
ENSMUSG00000022257	13292	ENSMUST00000022867	Laptm4b	protein_coding	cds	GGC	AGG	chr15	+	848	184	-43	34277474	34277476	18.2821	22.1417	34.04	18.9305	31.3553	29.1992	74.4637	79.485	3	3	0
ENSMUSG00000022265	13219	ENSMUST00000022875	Ank	protein_coding	5utr	NA	NA	chr15	+	13	-315	-1793	27466689	27466691	12.8657	19.0176	30.7502	16.2804	15.4073	21.033	62.6335	52.7207	3	3	0
ENSMUSG00000022285	13356	ENSMUST00000022894, ENSMUST00000110361, ENSMUST00000110362	Ywhaz	protein_coding	cds	GAA	AAG	chr15	-	759.667	101	-144	36776361	36776359	20.3255	19.1042	37.7021	22.5639	23.9253	23.7539	77.1318	70.2431	3	3	0
ENSMUSG00000022285	13361	ENSMUST00000022894, ENSMUST00000110361, ENSMUST00000110362, ENSMUST00000126184	Ywhaz	protein_coding	cds	AGT	ATT	chr15	-	610	63	-142.75	36790789	36790787	14.4355	11.6663	24.8601	14.9165	17.0665	12.6031	50.9619	44.586	3	3	0
ENSMUSG00000022337	13459	ENSMUST00000022962	Emc2	protein_coding	cds	GGT	GGA	chr15	+	663	202	-95	43511714	43511716	15.0829	11.3569	18.6205	18.0571	27.6293	16.6888	45.0603	62.3752	3	3	0
ENSMUSG00000022353	13606	ENSMUST00000080371	Mtss1	protein_coding	5utr	NA	NA	chr15	-	57	-406	-2685	59081970	59081968	27.1585	11.5102	25.8368	11.6954	12.2239	24.3778	64.5055	48.2972	3	3	0
ENSMUSG00000022353	13607	ENSMUST00000080371	Mtss1	protein_coding	5utr	NA	NA	chr15	-	56	-407	-2686	59081971	59081969	21.869	11.5102	22.0336	13.397	11.9646	11.7171	55.4129	37.0786	3	3	0
ENSMUSG00000022354	13584	ENSMUST00000022980	Ndufb9	protein_coding	cds	GGC	ACT	chr15	+	343	87	-92	58937372	58937374	17.4795	15.6506	16.0613	14.0476	23.4784	16.7358	49.1914	54.2618	3	3	0
ENSMUSG00000022354	13588	ENSMUST00000022980	Ndufb9	protein_coding	cds	GGT	ATT	chr15	+	523	147	-32	58939361	58939363	19.5879	15.4792	18.5262	18.6955	19.9021	34.1138	53.5932	72.7113	3	3	0
ENSMUSG00000022362	13566	ENSMUST00000176935, ENSMUST00000177176	Gm29394	protein_coding	5utr	NA	NA	chr15	-	195	-56	-484.5	58069395	58069393	10.8298	12.6647	18.1047	14.2422	20.359	23.8136	41.5992	58.4148	3	3	0
ENSMUSG00000022421	13959	ENSMUST00000023057, ENSMUST00000175858	Nptxr	protein_coding	cds	CCC	GGG	chr15	-	1159.5	335	-158	79792675	79792673	13.5771	19.5074	11.5959	17.9182	12.9443	18.02	44.6803	48.8825	3	3	0
ENSMUSG00000022425	13500	ENSMUST00000041591, ENSMUST00000173516, ENSMUST00000167541	Enpp2	protein_coding	cds	TAT	GAT	chr15	-	1929.67	632.333	-254	54850081	54850079	38.4325	20.5896	58.4204	59.4211	30.0936	28.6744	117.442	118.189	3	3	0
ENSMUSG00000022425	13502	ENSMUST00000171545	Enpp2	protein_coding	cds	TAT	GAT	chr15	-	1980	660	-254	54862584	54862582	39.5792	21.3119	60.0471	61.0911	31.0674	29.5992	120.938	121.758	3	3	0
ENSMUSG00000022426	13946	ENSMUST00000023061	Josd1	protein_coding	5utr	NA	NA	chr15	-	424	-579	-1187	79687449	79687447	19.7979	20.7254	18.0536	13.97	16.7748	21.9203	58.5769	52.6651	3	3	0
ENSMUSG00000022437	14204	ENSMUST00000023071	Samm50	protein_coding	cds	GGA	ATT	chr15	+	402	93	-376	84198610	84198612	36.9459	26.6237	43.1787	38.8364	45.5291	29.983	106.748	114.349	3	3	0
ENSMUSG00000022450	14168	ENSMUST00000023085	Ndufa6	protein_coding	cds	CCG	AAC	chr15	-	232	46	-85	82351074	82351072	72.5126	25.4275	72.3374	24.5217	24.1097	68.2759	170.278	116.907	3	3	0
ENSMUSG00000022454	14408	ENSMUST00000075275	Nell2	protein_coding	cds	AAT	GAG	chr15	-	419	125	-694	95435400	95435398	16.8742	15.6667	19.766	17.9147	18.9571	11.5747	52.3068	48.4465	3	3	0
ENSMUSG00000022454	14410	ENSMUST00000075275, ENSMUST00000166170	Nell2	protein_coding	cds	GCT, AAT	GAG	chr15	-	376.5	100.5	-718.5	95473625	95473623	16.8742	15.6667	16.0548	17.9147	18.9571	11.5747	48.5957	48.4465	3	3	0
ENSMUSG00000022507	15070	ENSMUST00000023150	1810013L24Rik	protein_coding	cds	CAA	CCC	chr16	+	912	184	-91	8843212	8843214	17.2739	13.064	21.0008	25.0156	22.9585	18.2429	51.3386	66.217	3	3	0
ENSMUSG00000022551	13739	ENSMUST00000023210	Cyc1	protein_coding	cds	TAT	CGG	chr15	+	1001	320	-5	76345741	76345743	22.2243	18.5485	18.1738	20.1698	27.0804	21.7541	58.9466	69.0043	3	3	0
ENSMUSG00000022564	13712	ENSMUST00000023225	Grina	protein_coding	cds	GAC	AAG	chr15	+	530	127	-218	76248367	76248449	21.4901	17.5557	42.0515	19.5561	23.8145	32.7331	81.0974	76.1038	3	3	0
ENSMUSG00000022710	15063	ENSMUST00000160326, ENSMUST00000160405, ENSMUST00000161046	Usp7	nonsense_mediated_decay, protein_coding	3utr, cds	NA, AAA	NA, CTT	chr16	-	2725.33	1425	583.667	8693888	8693886	33.2678	16.3454	23.8728	11.8429	17.2364	38.1129	73.486	67.1922	3	3	0
ENSMUSG00000022788	15191	ENSMUST00000161861	Fgd4	protein_coding	5utr	NA	NA	chr16	-	118	-278	-2578	16560102	16560100	24.2162	17.0884	32.9122	15.1052	32	25.3887	74.2168	72.4939	3	3	0
ENSMUSG00000022789	15176	ENSMUST00000023477	Dnm1l	protein_coding	cds	GGA	ATA	chr16	-	811	239	-460	16333923	16333921	42.3698	24.2956	29.4195	25.9689	35.8992	30.7148	96.085	92.5829	3	3	0
ENSMUSG00000022789	15177	ENSMUST00000096229	Dnm1l	protein_coding	cds	GGA	ATA	chr16	-	829	252	-460	16333944	16333942	42.4071	24.2956	29.3489	25.9689	35.8992	30.7579	96.0516	92.626	3	3	0
ENSMUSG00000022789	15179	ENSMUST00000115749	Dnm1l	protein_coding	cds	GGA	ATA	chr16	-	650	90	-497	16337005	16337003	42.9243	24.2956	29.9883	25.9689	35.8992	30.7495	97.2082	92.6176	3	3	0
ENSMUSG00000022812	15774	ENSMUST00000023507, ENSMUST00000114750	Gsk3b	protein_coding	cds	GCG	GAG	chr16	+	911.5	10	-416.5	38090555	38090557	32.9868	19.2516	20.0825	29.0948	30.2691	34.744	72.3209	94.1079	3	3	0
ENSMUSG00000022820	15629	ENSMUST00000023514	Ndufb4	protein_coding	cds	AAT	ATT	chr16	-	316	74	-55	37649119	37649117	13.3224	15.5373	25.5825	19.3524	20.4802	13.2004	54.4423	53.033	3	3	0
ENSMUSG00000022841	15322	ENSMUST00000090023, ENSMUST00000007216	Ap2m1	protein_coding	5utr	NA	NA	chr16	+	140	-27	-1331	20537634	20537636	39.1954	40.5374	16.0009	21.7341	42.1403	48.2036	95.7337	112.078	3	3	0
ENSMUSG00000022841	15333	ENSMUST00000126788	Ap2m1	nonsense_mediated_decay	5utr	NA	NA	chr16	+	23	-27	-275	20539999	20540001	41.1376	49.5011	17.5724	25.1226	42.5539	48.2036	108.211	115.88	3	3	0
ENSMUSG00000022858	15406	ENSMUST00000161286, ENSMUST00000023564	Tra2b	protein_coding	cds	GGA	GGA	chr16	-	974.5	221	-17	22247233	22247231	18.5241	15.1396	34.8231	16.0538	25.0453	18.7877	68.4868	59.8868	3	3	0
ENSMUSG00000022884	15437	ENSMUST00000023599, ENSMUST00000147117, ENSMUST00000077605, ENSMUST00000123413, ENSMUST00000131871, ENSMUST00000187168, ENSMUST00000168891	Eif4a2	protein_coding, nonsense_mediated_decay	cds, 5utr	GCG, NA	GAT, NA	chr16	+	128.571	-14.4286	-389.286	23107806	23107808	40.119	24.7819	25.9949	35.4741	41.9296	45.3452	90.8958	122.749	3	3	0
ENSMUSG00000022884	15438	ENSMUST00000168891	Eif4a2	protein_coding	5utr	NA	NA	chr16	+	329	-130	-1068	23107807	23107809	31.9272	18.226	18.8067	16.3737	25.1034	39.0179	68.9599	80.4951	3	3	0
ENSMUSG00000022884	15463	ENSMUST00000147117, ENSMUST00000077605, ENSMUST00000123413, ENSMUST00000131871, ENSMUST00000023599, ENSMUST00000168891, ENSMUST00000187168	Eif4a2	nonsense_mediated_decay, protein_coding	3utr, cds	NA, CGT	NA, GAA	chr16	+	1105	456.5	109.4	23111876	23111878	22.4479	14.7727	39.5465	17.8154	18.3205	31.2118	76.7671	67.3477	3	3	0
ENSMUSG00000022884	15466	ENSMUST00000023599, ENSMUST00000168891, ENSMUST00000077605, ENSMUST00000123413, ENSMUST00000187168	Eif4a2	protein_coding, nonsense_mediated_decay	cds	GAA	AAC	chr16	+	1182.6	335	-26	23111879	23111881	31.112	13.6934	28.1452	19.8122	43.4384	27.3781	72.9506	90.6288	3	3	0
ENSMUSG00000022884	15467	ENSMUST00000131871, ENSMUST00000147117	Eif4a2	nonsense_mediated_decay	3utr	NA	NA	chr16	+	950.5	923.5	632	23111880	23111882	17.8188	10.1504	26.8318	29.8395	33.4072	14.0277	54.801	77.2743	3	3	0
ENSMUSG00000022890	16024	ENSMUST00000114193, ENSMUST00000114191, ENSMUST00000023608, ENSMUST00000138279	Atp5j	protein_coding	cds	GGA	GAG	chr16	-	547.25	84	-19.75	84828462	84828460	41.93	36.1721	15.7262	54.5781	57.4337	55.6558	93.8282	167.668	3	3	0
ENSMUSG00000022890	16028	ENSMUST00000114193, ENSMUST00000114191, ENSMUST00000023608, ENSMUST00000138279	Atp5j	protein_coding	cds	GGT	GTT	chr16	-	370.25	25	-78.75	84831418	84831416	13.8696	20.8827	32.9913	23.4469	38.9302	17.6493	67.7436	80.0264	3	3	0
ENSMUSG00000022892	16059	ENSMUST00000005406	App	protein_coding	cds	AAT	GAG	chr16	-	1316	372	-323	85024919	85024917	11.7712	10.0661	21.5254	14.1209	13.9947	12.3172	43.3626	40.4329	3	3	0
ENSMUSG00000022956	16206	ENSMUST00000155452, ENSMUST00000023677, ENSMUST00000139277	Atp5o	nonsense_mediated_decay, protein_coding	3utr, cds	NA, GCA	NA, TCT	chr16	-	467	159	-14.6667	91926465	91926463	14.0881	14.7046	34.5292	13.536	14.5553	16.5685	63.3219	44.6598	3	3	0
ENSMUSG00000022956	16212	ENSMUST00000023677, ENSMUST00000139277	Atp5o	protein_coding	cds	GGT	CGC	chr16	-	462.5	61	-92	91926555	91926553	22.6122	32.1137	12.2661	33.3731	49.6678	31.762	66.992	114.803	3	3	0
ENSMUSG00000022956	16214	ENSMUST00000023677, ENSMUST00000154661	Atp5o	protein_coding	cds	AAT	GAC	chr16	-	409.5	93	-67.5	91926905	91926903	13.7316	23.4537	11.3407	21.246	31.6554	19.3223	48.526	72.2237	3	3	0
ENSMUSG00000022956	16217	ENSMUST00000139277	Atp5o	protein_coding	5utr	NA	NA	chr16	-	341	-87	-369	91926943	91926941	24.5661	23.4312	53.4076	29.0029	24.0457	35.4411	101.405	88.4897	3	3	0
ENSMUSG00000022956	16218	ENSMUST00000023677, ENSMUST00000154661	Atp5o	protein_coding	cds	AAT	CCC	chr16	-	370.5	80	-80.5	91926944	91926942	47.4775	47.617	83.7007	53.6847	61.1338	80.5291	178.795	195.348	3	3	0
ENSMUSG00000023004	14503	ENSMUST00000077577	Tuba1b	protein_coding	cds	GAG	GAC	chr15	-	1496	422	-29	98931672	98931670	21.1743	12.6993	16.4292	15.7631	18.673	13.9729	50.3029	48.409	3	3	0
ENSMUSG00000023004	14519	ENSMUST00000077577	Tuba1b	protein_coding	cds	AAT	GCT	chr15	-	1214	328	-123	98931954	98931952	46.1172	17.9495	71.3602	14.1172	19.8991	34.0948	135.427	68.1112	3	3	0
ENSMUSG00000023004	14528	ENSMUST00000077577	Tuba1b	protein_coding	cds	GCA	GAG	chr15	-	1094	288	-163	98932074	98932072	40.0026	36.5166	65.5535	52.0691	52.7346	33.1461	142.073	137.95	3	3	0
ENSMUSG00000023004	14530	ENSMUST00000077577	Tuba1b	protein_coding	cds	GTC	ATC	chr15	-	1052	274	-177	98932116	98932114	41.0007	16.8817	75.0714	20.0138	16.4539	35.9627	132.954	72.4304	3	3	0
ENSMUSG00000023004	14535	ENSMUST00000077577	Tuba1b	protein_coding	cds	ACA	GAA	chr15	-	986	252	-199	98932182	98932180	36.0888	20.5301	58.0262	24.1364	29.0548	19.1809	114.645	72.372	3	3	0
ENSMUSG00000023004	14544	ENSMUST00000077577	Tuba1b	protein_coding	cds	TTC	ATG	chr15	-	833	201	-250	98932335	98932333	28.4459	13.1899	16.1073	13.4289	22.7843	21.8808	57.7432	58.094	3	3	0
ENSMUSG00000023004	14552	ENSMUST00000077577	Tuba1b	protein_coding	cds	GGA	AAG	chr15	-	713	161	-290	98932455	98932453	42.634	28.7428	35.0312	33.3871	45.9432	43.2332	106.408	122.563	3	3	0
ENSMUSG00000023004	14559	ENSMUST00000077577	Tuba1b	protein_coding	cds	GAG	ATC	chr15	-	566	112	-339	98932731	98932729	44.6471	15.5087	42.3374	14.1651	18.5388	11.7399	102.493	44.4438	3	3	0
ENSMUSG00000023004	14562	ENSMUST00000077577	Tuba1b	protein_coding	cds	GAG	GAT	chr15	-	518	96	-355	98932779	98932777	25.7094	12.0764	23.8794	16.0037	15.4612	23.5722	61.6653	55.037	3	3	0
ENSMUSG00000023004	14565	ENSMUST00000077577	Tuba1b	protein_coding	cds	GAA	CCC	chr15	-	440	70	-381	98932989	98932987	27.8183	29.5631	41.9725	25.7183	34.9934	25.6471	99.3539	86.3588	3	3	0
ENSMUSG00000023004	14566	ENSMUST00000077577	Tuba1b	protein_coding	cds	CTG	GAA	chr15	-	437	69	-382	98932992	98932990	30.0396	10.827	28.2535	12.8417	16.5465	19.2226	69.1201	48.6108	3	3	0
ENSMUSG00000023004	14568	ENSMUST00000077577	Tuba1b	protein_coding	cds	AGT	GAG	chr15	-	389	53	-398	98933040	98933038	24.0817	11.3015	36.4726	23.4801	30.2591	21.4575	71.8558	75.1967	3	3	0
ENSMUSG00000023004	14570	ENSMUST00000077577	Tuba1b	protein_coding	cds	GGA	GGA	chr15	-	359	43	-408	98933070	98933068	37.1873	13.7045	46.4631	15.6109	18.354	17.7937	97.3549	51.7587	3	3	0
ENSMUSG00000023004	14573	ENSMUST00000077577	Tuba1b	protein_coding	cds	CAG	CCT	chr15	-	320	30	-421	98933109	98933107	145.684	97.7326	187.468	104.27	158.482	33.8028	430.885	296.555	3	3	0
ENSMUSG00000023004	14576	ENSMUST00000077577	Tuba1b	protein_coding	cds	GGT	GTC	chr15	-	266	12	-439	98933163	98933161	28.0705	11.6383	10.5453	11.0587	13.2165	27.1172	50.2541	51.3925	3	3	0
ENSMUSG00000023087	24664	ENSMUST00000144826	Noct	protein_coding	5utr	NA	NA	chr3	+	101	-7507	-8604	51240306	51240308	45.7805	100.778	52.7343	71.0648	75.6555	119.311	199.293	266.032	3	3	0
ENSMUSG00000023087	24696	ENSMUST00000144826	Noct	protein_coding	5utr	NA	NA	chr3	+	5016	-2592	-3689	51245221	51245223	45.7805	100.778	52.7343	71.0648	75.6555	119.311	199.293	266.032	3	3	0
ENSMUSG00000023092	42776	ENSMUST00000023854, ENSMUST00000114769, ENSMUST00000116596, ENSMUST00000114773, ENSMUST00000114772, ENSMUST00000144600	Fhl1	protein_coding	cds	GGA	GGA	chrX	+	674.333	178.5	-108.5	56790475	56790477	16.719	22.6738	41.1669	16.7225	28.1908	14.9226	80.5597	59.8358	3	3	0
ENSMUSG00000023150	1594	ENSMUST00000023918, ENSMUST00000111887, ENSMUST00000097543, ENSMUST00000186745	Ivns1abp	protein_coding, nonsense_mediated_decay	5utr	NA	NA	chr1	+	202.5	-280	-1545	151344722	151344724	25.6125	35.2184	103.622	19.3584	37.3461	17.7698	164.453	74.4743	3	3	0
ENSMUSG00000023150	1595	ENSMUST00000023918, ENSMUST00000111887, ENSMUST00000097543, ENSMUST00000186745	Ivns1abp	protein_coding, nonsense_mediated_decay	5utr	NA	NA	chr1	+	203.5	-279	-1544	151344723	151344725	46.3239	25.0849	54.0285	21.3051	26.2257	38.9667	125.437	86.4975	3	3	0
ENSMUSG00000023150	1599	ENSMUST00000023918, ENSMUST00000111887, ENSMUST00000097543, ENSMUST00000186745	Ivns1abp	protein_coding, nonsense_mediated_decay	cds	GAG	GAA	chr1	+	982.5	167	-254	151354063	151354065	19.6542	10.7134	11.0622	14.2758	25.631	16.7432	41.4297	56.6499	3	3	0
ENSMUSG00000023175	3333	ENSMUST00000179781, ENSMUST00000067036, ENSMUST00000105381	Bsg	protein_coding	cds	GAG	GAC	chr10	+	322	83.3333	-210	79709792	79709794	13.7469	16.4183	15.6582	15.6782	24.014	27.6235	45.8234	67.3156	3	3	0
ENSMUSG00000023175	3341	ENSMUST00000178383	Bsg	protein_coding	cds	GGG	AAT	chr10	+	195	65	-132	79710080	79710082	15.1776	15.5338	23.2936	14.6819	15.6123	14.7196	54.005	45.0138	3	3	0
ENSMUSG00000023175	3346	ENSMUST00000067036, ENSMUST00000179781, ENSMUST00000105381	Bsg	protein_coding	cds	GGA	GAG	chr10	+	487	138.333	-155	79710306	79710308	10.0458	14.5886	16.544	21.0279	22.2782	17.2403	41.1784	60.5464	3	3	0
ENSMUSG00000023175	3347	ENSMUST00000178383	Bsg	protein_coding	cds	GAG	AGC	chr10	+	303	101	-96	79710307	79710309	10.1544	14.6263	15.042	18.531	18.0594	18.1429	39.8227	54.7334	3	3	0
ENSMUSG00000023175	3375	ENSMUST00000179781, ENSMUST00000067036, ENSMUST00000105381	Bsg	protein_coding	cds	CGG	AAG	chr10	+	841	256.333	-37	79710895	79710897	39.7305	14.3056	55.32	10.7299	12.8683	53.5365	109.356	77.1347	3	3	0
ENSMUSG00000023175	3377	ENSMUST00000178383	Bsg	protein_coding	cds	CGC	CCC	chr10	+	582	194	-3	79711271	79711273	16.3656	19.4947	36.6231	11.5424	17.98	24.2693	72.4834	53.7917	3	3	0
ENSMUSG00000023175	3378	ENSMUST00000179781, ENSMUST00000067036, ENSMUST00000105381	Bsg	protein_coding	cds	GCC	CCA	chr10	+	883	270.333	-23	79711272	79711274	10.5539	15.8817	27.9437	11.0942	16.5764	18.2645	54.3792	45.9351	3	3	0
ENSMUSG00000023236	22782	ENSMUST00000024005	Scg5	protein_coding	cds	CCT	GAC	chr2	-	223	31	-181	113827472	113827470	14.9639	12.9428	12.1946	18.9159	14.0889	12.573	40.1013	45.5778	3	3	0
ENSMUSG00000023286	28709	ENSMUST00000024056, ENSMUST00000105583, ENSMUST00000105582, ENSMUST00000105581	Ube2j2	protein_coding	5utr	NA	NA	chr4	+	193.5	-106	-912	155946285	155946287	34.2235	40.8743	49.0426	17.1033	26.4815	46.0907	124.14	89.6755	3	3	0
ENSMUSG00000023328	30980	ENSMUST00000024099, ENSMUST00000085934	Ache	protein_coding	cds	CGA	GAG	chr5	+	471	120	-494	137290393	137290395	18.5285	13.0368	25.1852	13.8564	17.1464	24.8064	56.7506	55.8093	3	3	0
ENSMUSG00000023353	28874	ENSMUST00000024123	Agap3	protein_coding	cds	GAT	GAA	chr5	+	636	201.5	-708	24477113	24477115	10.5963	12.1221	20.3633	10.3283	21.2114	25.4398	43.0816	56.9796	3	3	0
ENSMUSG00000023456	33234	ENSMUST00000172132, ENSMUST00000149610	Tpi1	protein_coding	cds	GCA	ACC	chr6	-	753	199	-34	124811374	124811372	19.3688	13.0715	23.9872	22.5444	27.0051	36.2951	56.4275	85.8446	3	3	0
ENSMUSG00000023456	33250	ENSMUST00000172132	Tpi1	protein_coding	cds	ATG	GCG	chr6	-	174	50	-249	124814123	124814121	84.1527	43.5933	78.186	34.9072	51.4952	85.8174	205.932	172.22	3	3	0
ENSMUSG00000023845	16517	ENSMUST00000041047	Lnpep	protein_coding	cds	CGA	GAA	chr17	-	1949	437.5	-587	17553236	17553234	17	13.1778	19.9524	10.3053	16.0077	14.2441	50.1301	40.5571	3	3	0
ENSMUSG00000023904	16557	ENSMUST00000180140, ENSMUST00000024697, ENSMUST00000179928	Hcfc1r1	protein_coding	cds	GGG	GAT	chr17	+	495	99.6667	-19	23674959	23674961	21.5097	16.631	13.1729	15.875	20.9856	18.7287	51.3136	55.5893	3	3	0
ENSMUSG00000023913	17569	ENSMUST00000167418, ENSMUST00000024706, ENSMUST00000169694	Pla2g7	protein_coding	5utr	NA	NA	chr17	+	293.667	-25	-885.667	43588573	43588575	20.0964	12.4108	26.7809	10.9754	16.718	20.0777	59.288	47.7711	3	3	0
ENSMUSG00000023915	17567	ENSMUST00000024708	Tnfrsf21	protein_coding	cds	CAG	CCC	chr17	+	2230	596	-59	43087792	43087794	15.0347	17.7088	27.4393	23.3489	17.8386	33.0524	60.1829	74.2399	3	3	0
ENSMUSG00000023944	17631	ENSMUST00000024739, ENSMUST00000165127	Hsp90ab1	protein_coding	cds	GGA	ATT	chr17	-	870	258	-184.5	45569385	45569383	98.5539	50.8677	80.0408	70.9214	76.6458	57.4265	229.462	204.994	3	3	0
ENSMUSG00000023944	17657	ENSMUST00000024739	Hsp90ab1	protein_coding	cds	GGC	ATG	chr17	-	378	91	-633	45571494	45571492	28.7899	21.2575	25.3245	27.8794	27.5463	13.3627	75.3719	68.7884	3	3	0
ENSMUSG00000024038	17063	ENSMUST00000191598, ENSMUST00000064798	Ndufv3	protein_coding	cds	CCC	AAG	chr17	+	211	49	-46	31521667	31521669	10.6667	13.64	14.7842	14.3452	16.1242	17.1875	39.0909	47.6569	3	3	0
ENSMUSG00000024038	17066	ENSMUST00000046288	Ndufv3	protein_coding	cds	CCC	AAG	chr17	+	243	49	-419	31527324	31527326	10.6667	13.64	14.7842	17.7463	18.3438	17.1875	39.0909	53.2776	3	3	0
ENSMUSG00000024038	17070	ENSMUST00000064798	Ndufv3	protein_coding	cds	CAG	CCG	chr17	+	378	93	-11	31531216	31531218	13.4832	22.8053	36.944	19.5855	29.0411	37.2216	73.2326	85.8482	3	3	0
ENSMUSG00000024038	17073	ENSMUST00000046288	Ndufv3	protein_coding	cds	CAG	CCG	chr17	+	1467	457	-11	31531256	31531258	13.4832	22.8053	36.944	19.5855	29.0411	37.2216	73.2326	85.8482	3	3	0
ENSMUSG00000024083	17915	ENSMUST00000172818, ENSMUST00000172733, ENSMUST00000024888, ENSMUST00000024889	Pja2	protein_coding	cds	GGA	ATT	chr17	-	565.25	158	-518	64309425	64309423	19.1857	12.6014	18.9035	22.3919	25.1796	14.627	50.6906	62.1984	3	3	0
ENSMUSG00000024091	17926	ENSMUST00000024897	Vapa	protein_coding	cds	AAT	GAT	chr17	-	758	167	-82	65582670	65582668	14.6847	18.3162	12.8499	31.4563	28.6533	17.7504	45.8508	77.86	3	3	0
ENSMUSG00000024099	17944	ENSMUST00000143987, ENSMUST00000024909	Ndufv2	protein_coding	cds	CCA	AGG	chr17	-	758.5	168	-32	66080816	66080814	33.9355	30.0485	50.5679	29.0721	40.6731	24.2511	114.552	93.9962	3	3	0
ENSMUSG00000024099	17947	ENSMUST00000143987, ENSMUST00000024909	Ndufv2	protein_coding	cds	GGA	ATA	chr17	-	575.5	107	-93	66083507	66087403	13.6622	13.8089	10.8209	14.7339	12.2655	16.1526	38.2921	43.152	3	3	0
ENSMUSG00000024104	32983	ENSMUST00000036759	Washc2	protein_coding	cds	CAA	CCT	chr6	+	1857	589	-745	116238174	116238176	17.8171	19.833	31.8333	34.7968	41.6061	23.7868	69.4834	100.19	3	3	0
ENSMUSG00000024109	18293	ENSMUST00000160844	Nrxn1	protein_coding	5utr	NA	NA	chr17	-	1022	-331	-4854	91088791	91088789	48.6325	28.9914	48.7868	27.9606	54.9842	37.2464	126.411	120.191	3	3	0
ENSMUSG00000024109	18294	ENSMUST00000160844	Nrxn1	protein_coding	5utr	NA	NA	chr17	-	1021	-332	-4855	91088792	91088790	13.8842	19.2034	58.4419	23.171	23.1833	14.4196	91.5296	60.7739	3	3	0
[truncated: 2,089 more rows]

## Sheet: Hbs1l_MEFs
ensembl_gene_id	genome_index	ensembl_transcript_id	external_gene_name	transcript_biotype	region	P_codon	A_codon	chrom	strand	coordinate	relative_start	relative_end	spliced_start	spliced_end	Cre_control_fibro_Hbs1l_batch_1	Cre_control_fibro_Hbs1l_batch_2	Cre_control_fibro_Hbs1l_batch_3	Hbs1l_fibro_1	Hbs1l_fibro_2	Hbs1l_fibro_3	Hbs1l_pause_sum	Control_pause_sum	Hbs1l_pause_count	Control_pause_count	pause_difference
[truncated: 4,192 more rows]

[truncated: 2 more sheets: Pelo_MEFs, Upf2_MEFs]
