# Supplementary material for: Defects in translation-dependent quality control pathways lead to convergent molecular and neurodevelopmental pathology
Source: eLife. 2021 Apr 26;10:e66904. doi: 10.7554/eLife.66904 (PMC8075583; doi:10.7554/eLife.66904)
Supplement: Supplementary file 3. [file elife-66904-supp3.xlsx]

## Sheet: DE_RPF_Hbs1l_embryo
baseMean	log2FoldChange	lfcSE	stat	pvalue	padj	gene_id	external_gene_name	Control_embryo_rep1	Control_embryo_rep2	Control_embryo_rep3	Hbs1l_embryo_rep1	Hbs1l_embryo_rep2	Hbs1l_embryo_rep3
456.443	3.90981	0.218651	-17.8815	1.6422e-71	2.0562e-67	ENSMUSG00000006488.17	Prl7a1	43.9702	75.4069	47.8826	848.328	790.679	932.393
3972.06	-3.25515	0.213277	15.2626	1.35813e-52	8.50255e-49	ENSMUSG00000052187.4	Hbb-y	6385.61	5986.77	9197.23	527.379	978.806	756.593
453.657	4.30226	0.298391	-14.4182	3.97475e-47	1.65893e-43	ENSMUSG00000030790.15	Adm	32.6231	57.4528	39.0621	835.269	503.49	1254.04
117.283	4.59622	0.410817	-11.188	4.66864e-29	1.4614e-25	ENSMUSG00000057170.6	Prl3d1	2.83679	12.5678	11.3406	298.346	157.227	221.378
105.785	-3.57367	0.35668	10.0193	1.25408e-23	3.14046e-20	ENSMUSG00000019977.16	Hbs1l	215.596	185.824	180.19	10.5476	9.99709	32.5556
86.9423	4.61083	0.465643	-9.90208	4.07696e-23	8.50793e-20	ENSMUSG00000056457.6	Prl2c3	4.25518	8.07931	7.56041	163.237	105.424	233.098
198.339	-2.29112	0.254264	9.01078	2.04591e-19	3.65955e-16	ENSMUSG00000006574.15	Slc4a1	256.729	365.364	362.899	47.7153	81.7944	75.529
108.296	2.98274	0.335169	-8.89923	5.62348e-19	8.80144e-16	ENSMUSG00000027611.12	Procr	24.1127	21.5448	27.7215	228.029	121.783	226.587
72.8568	-3.60052	0.43953	8.19173	2.57495e-16	3.58233e-13	ENSMUSG00000057278.8	Snrpg	201.412	131.962	71.8239	16.0725	5.45296	10.4178
73.924	3.66779	0.462496	-7.93042	2.18409e-15	2.7347e-12	ENSMUSG00000044903.15	Psg22	2.83679	14.3632	13.8607	118.033	80.8856	213.565
148.922	-2.48701	0.33505	7.4228	1.14672e-13	1.30528e-10	ENSMUSG00000064354.1	mt-Co2	314.883	246.868	200.351	74.3354	24.5383	32.5556
226.952	-1.97927	0.277475	7.13315	9.80963e-13	1.02355e-09	ENSMUSG00000069919.7	Hba-a1	334.741	343.819	410.782	99.951	128.145	44.2756
214.565	-1.51222	0.214176	7.06066	1.65711e-12	1.59606e-09	ENSMUSG00000002100.15	Mybpc3	329.067	352.796	273.435	127.576	108.15	96.3646
145.115	1.81375	0.266572	-6.80397	1.01775e-11	9.10229e-09	ENSMUSG00000031297.14	Slc7a3	60.9909	64.6344	68.0437	267.708	251.745	157.569
87.8287	3.06032	0.45363	-6.74631	1.51658e-11	1.26594e-08	ENSMUSG00000054753.9	AU018091	28.3679	13.4655	15.1208	108.489	76.3414	285.187
76.0752	2.78109	0.417192	-6.66622	2.62483e-11	2.0541e-08	ENSMUSG00000040065.8	Pfpl	18.4391	30.5218	7.56041	147.666	79.0679	173.196
234.782	-1.50785	0.230988	6.52785	6.67208e-11	4.91418e-08	ENSMUSG00000031972.5	Acta1	338.996	353.694	349.039	137.621	80.8856	148.454
255.51	1.44922	0.224992	-6.4412	1.18529e-10	8.24501e-08	ENSMUSG00000001627.12	Ifrd1	134.747	133.757	141.128	271.726	418.06	433.641
136.517	-2.22856	0.348463	6.3954	1.6013e-10	1.05525e-07	ENSMUSG00000038274.13	Fau	252.474	256.742	170.109	79.8603	39.0795	20.8356
95.4027	-2.2478	0.357243	6.29207	3.13257e-10	1.96115e-07	ENSMUSG00000098274.7	Rpl24	157.442	201.983	114.666	47.7153	15.4501	35.1601
2952.83	-1.04922	0.171792	6.10751	1.01199e-09	6.03385e-07	ENSMUSG00000068614.7	Actc1	3889.24	3977.71	4076.32	2045.73	1429.58	2298.43
83.9809	-2.0238	0.333419	6.06982	1.28053e-09	7.28793e-07	ENSMUSG00000064358.1	mt-Co3	171.626	137.348	95.7651	39.1768	20.903	39.0667
102.436	1.94615	0.324147	-6.00391	1.92621e-09	1.04861e-06	ENSMUSG00000005125.13	Ndrg1	38.2966	35.908	52.9228	197.391	99.9709	190.125
86.428	-2.09789	0.353469	5.93514	2.93595e-09	1.53171e-06	ENSMUSG00000028832.11	Stmn1	156.023	168.768	98.2853	49.7243	23.6295	22.1378
198.573	1.27661	0.219563	-5.81435	6.08714e-09	3.04868e-06	ENSMUSG00000020717.19	Pecam1	127.655	98.7471	122.227	263.69	253.563	325.556
426.003	-1.59441	0.275286	5.79185	6.96156e-09	3.26209e-06	ENSMUSG00000022483.17	Col2a1	634.022	718.16	573.331	338.025	172.677	119.805
54.4769	-2.73493	0.472345	5.7901	7.0343e-09	3.26209e-06	ENSMUSG00000057322.12	Rpl38	90.7772	110.417	85.6846	27.6246	4.54413	7.81335
294.822	-1.34573	0.235709	5.70931	1.13434e-08	5.07253e-06	ENSMUSG00000026043.18	Col3a1	449.631	400.374	423.383	231.545	118.147	145.849
80.5058	2.16697	0.381774	-5.67606	1.37834e-08	5.9511e-06	ENSMUSG00000038264.8	Sema7a	22.6943	26.931	37.802	117.028	75.4326	203.147
22.9285	4.22609	0.756293	-5.5879	2.29831e-08	9.59239e-06	ENSMUSG00000062737.13	Prl3d2	1.41839	1.7954	3.7802	40.6836	29.9913	59.9023
363.94	-0.997719	0.182542	5.46569	4.61118e-08	1.80583e-05	ENSMUSG00000026414.13	Tnnt2	458.141	544.904	453.624	274.237	232.66	220.076
91.0935	2.1996	0.40245	-5.46553	4.61518e-08	1.80583e-05	ENSMUSG00000042357.2	Gjb5	22.6943	31.4195	42.8423	129.082	71.7973	248.725
65.3058	1.99382	0.366504	-5.4401	5.32515e-08	2.02049e-05	ENSMUSG00000029019.8	Nppb	29.7863	27.8287	21.4212	141.639	70.8885	100.271
90.7472	-1.79385	0.333758	5.37469	7.67131e-08	2.82507e-05	ENSMUSG00000052374.16	Actn2	123.4	136.45	160.029	33.6518	24.5383	66.4135
67.011	-1.93265	0.360018	5.36821	7.95232e-08	2.84489e-05	ENSMUSG00000064357.1	mt-Atp6	123.4	113.11	81.9044	32.6473	14.5412	36.4623
76.8741	5.35334	1.00391	-5.3325	9.68682e-08	3.36913e-05	ENSMUSG00000017064.4	Prl5a1	2.83679	5.3862	2.52014	74.8377	52.7119	322.952
24.1307	6.8144	1.28588	-5.29939	1.16193e-07	3.93202e-05	ENSMUSG00000079092.4	Prl2c2	1.41839	0	0	36.6654	27.2648	79.4357
760.368	0.83872	0.159857	-5.24669	1.54859e-07	5.1026e-05	ENSMUSG00000023169.15	Slc38a1	465.233	607.743	560.73	936.726	1033.34	958.438
21.791	4.74978	0.913284	-5.20077	1.98468e-07	6.37183e-05	ENSMUSG00000051457.7	Spn	0	0.897701	3.7802	33.1496	19.9942	72.9246
447.137	4.39585	0.847885	-5.18448	2.16615e-07	6.78058e-05	ENSMUSG00000032068.14	Plet1	32.6231	48.4758	40.3222	480.669	247.201	1833.53
82.8728	1.7241	0.333272	-5.17325	2.30054e-07	7.02562e-05	ENSMUSG00000074743.4	Thbd	32.6231	30.5218	52.9228	147.164	88.1562	145.849
32.2026	-2.45145	0.476945	5.1399	2.74885e-07	8.19485e-05	ENSMUSG00000035458.15	Tnni3	72.3381	43.0896	49.1426	13.5612	7.27061	7.81335
797.621	-0.786461	0.15343	5.12586	2.96175e-07	8.57709e-05	ENSMUSG00000004885.5	Crabp2	1053.87	965.926	1009.31	603.222	515.305	638.09
99.1822	-1.87234	0.365508	5.12257	3.01407e-07	8.57709e-05	ENSMUSG00000069917.7	Hba-a2	131.911	158.893	178.93	48.7198	63.6179	13.0222
155.267	1.67965	0.331685	-5.06399	4.10564e-07	0.000114112	ENSMUSG00000024406.16	Pou5f1	131.911	51.1689	40.3222	203.92	239.93	264.352
22.4391	4.23404	0.837444	-5.05591	4.28341e-07	0.000114112	ENSMUSG00000062551.13	Prl2c1	0	1.7954	5.04027	81.3671	19.0854	27.3467
121.851	1.88272	0.372162	-5.05888	4.21737e-07	0.000114112	ENSMUSG00000068457.14	Uty	24.1127	35.908	95.7651	162.734	159.954	252.632
1450.6	0.807558	0.161809	-4.9908	6.01303e-07	0.000156852	ENSMUSG00000026600.12	Soat1	1119.11	1000.04	1044.6	1498.76	2111.2	1929.9
86.1655	4.48519	0.901155	-4.97716	6.45251e-07	0.000161584	ENSMUSG00000023159.8	Psg29	4.25518	13.4655	3.7802	106.983	68.162	320.347
29.4185	2.56035	0.514409	-4.97726	6.44904e-07	0.000161584	ENSMUSG00000003555.8	Cyp17a1	8.51036	8.07931	8.82047	41.1858	40.8972	69.0179
43.427	-2.03897	0.413844	4.92691	8.35408e-07	0.000205101	ENSMUSG00000015217.11	Hmgb3	82.2669	76.3046	51.6628	22.0997	9.99709	18.2311
18.1549	5.50074	1.14253	-4.81455	1.47535e-06	0.000355247	ENSMUSG00000025279.7	Dnase1l3	0	0	2.52014	28.6292	30.9001	46.8801
546.271	-0.950146	0.198795	4.77953	1.75706e-06	0.000415096	ENSMUSG00000061086.12	Myl4	682.248	741.501	735.88	427.429	260.833	429.734
722.039	0.750723	0.157565	-4.76454	1.89282e-06	0.000438889	ENSMUSG00000029752.12	Asns	544.663	498.224	572.071	813.671	993.348	910.255
1325.19	-0.879835	0.184853	4.75964	1.93941e-06	0.000441515	ENSMUSG00000007872.3	Id3	1788.59	1526.99	1840.96	1205.44	757.053	832.122
301.164	1.24233	0.262144	-4.73911	2.14664e-06	0.000479965	ENSMUSG00000072944.11	Nup62cl	195.738	153.507	186.49	261.681	405.337	604.232
41.4946	2.67937	0.571183	-4.69091	2.71989e-06	0.000597469	ENSMUSG00000068048.8	Rhox9	7.09197	9.87471	16.3809	65.7969	20.903	128.92
145.493	7.2378	1.54905	-4.67241	2.97685e-06	0.00064264	ENSMUSG00000022886.5	Prl2a1	1.41839	1.7954	2.52014	73.8331	17.2677	776.126
66.5388	1.92822	0.413631	-4.6617	3.13607e-06	0.000665538	ENSMUSG00000021822.3	Plau	19.8575	30.5218	31.5017	79.3581	60.8914	177.103
112.112	-1.55125	0.333382	4.65308	3.27009e-06	0.000682414	ENSMUSG00000013936.12	Myl2	161.697	174.154	162.549	45.7062	30.9001	97.6669
961.685	0.722095	0.15539	-4.64699	3.36816e-06	0.000691357	ENSMUSG00000017707.9	Serinc3	753.167	714.57	708.158	1079.37	1130.58	1384.27
300.766	-0.888359	0.192184	4.62243	3.79275e-06	0.000765952	ENSMUSG00000050708.16	Ftl1	449.631	340.229	384.321	233.051	198.124	199.24
85.0275	-1.70289	0.370875	4.59156	4.39939e-06	0.000874361	ENSMUSG00000074797.11	Itpa	157.442	139.144	97.0252	63.7878	34.5354	18.2311
332.236	-1.01063	0.221172	4.56944	4.89039e-06	0.000956759	ENSMUSG00000026418.16	Tnni1	441.121	471.293	423.383	298.848	169.951	188.823
244.676	-0.916891	0.201729	4.54515	5.48952e-06	0.00105745	ENSMUSG00000067818.6	Myl9	310.628	282.776	367.94	187.345	152.683	166.685
20.1108	4.0493	0.891666	-4.54128	5.59145e-06	0.00106077	ENSMUSG00000031133.12	Arhgef6	1.41839	2.6931	2.52014	28.6292	7.27061	78.1335
137.875	-1.22165	0.269307	4.53627	5.72576e-06	0.00107003	ENSMUSG00000057497.8	Fam136a	221.269	172.359	189.01	112.005	72.7061	59.9023
45.9404	-1.76733	0.391898	4.50967	6.49299e-06	0.00119557	ENSMUSG00000064360.1	mt-Nd3	59.5726	72.7137	79.3843	19.0861	13.6324	31.2534
36.6585	-2.07695	0.461022	4.5051	6.63406e-06	0.00120384	ENSMUSG00000048001.7	Hes5	85.1036	38.6011	55.443	19.0861	9.99709	11.72
2221.61	-0.922872	0.204998	4.50186	6.73606e-06	0.00120489	ENSMUSG00000069310.4	H3c3	3066.57	2612.31	3051.88	2082.4	1051.51	1465
525.461	0.924604	0.206871	-4.46947	7.84123e-06	0.00132676	ENSMUSG00000039756.12	Dnttip2	353.18	368.057	364.16	474.642	787.953	804.775
1109.07	-0.864074	0.193318	4.4697	7.83309e-06	0.00132676	ENSMUSG00000041841.8	Rpl37	1668.03	1412.98	1218.49	1018.09	666.17	670.646
107.07	-1.39755	0.312223	4.47612	7.60129e-06	0.00132676	ENSMUSG00000035242.15	Oaz1	175.881	130.167	161.289	79.8603	32.7178	62.5068
387.183	0.801161	0.179174	-4.47141	7.77048e-06	0.00132676	ENSMUSG00000038909.16	Kat7	266.658	279.185	299.896	423.41	543.478	510.472
40.2518	1.96304	0.440603	-4.45534	8.37601e-06	0.00139835	ENSMUSG00000020057.2	Dram1	17.0207	14.3632	17.6409	39.679	68.162	84.6446
181.18	-1.09888	0.2474	4.44171	8.92463e-06	0.00147033	ENSMUSG00000059741.13	Myl3	248.219	233.402	258.314	121.046	76.3414	149.756
748.062	-0.881052	0.198905	4.42952	9.44425e-06	0.00153573	ENSMUSG00000001506.10	Col1a1	975.855	1060.18	877.007	701.666	433.51	440.152
141.31	1.15514	0.26155	-4.41652	1.00304e-05	0.00161013	ENSMUSG00000005892.4	Trh	123.4	69.1229	71.8239	184.332	199.942	199.24
165.631	1.44838	0.328307	-4.41166	1.0258e-05	0.00162582	ENSMUSG00000061186.15	Sfmbt2	133.329	72.7137	60.4832	147.666	225.389	354.205
80.9354	1.66332	0.37754	-4.40567	1.05456e-05	0.00165052	ENSMUSG00000020689.4	Itgb3	31.2047	41.2942	42.8423	101.96	69.0708	199.24
220.744	-0.904165	0.205544	4.3989	1.08803e-05	0.00168188	ENSMUSG00000091898.8	Tnnc1	306.373	266.617	289.816	157.712	128.145	175.8
254.711	0.890078	0.202817	-4.38857	1.14097e-05	0.0017422	ENSMUSG00000029648.13	Flt1	174.462	190.313	168.849	272.731	359.895	362.019
1874.42	-0.835078	0.19047	4.3843	1.16358e-05	0.00175533	ENSMUSG00000015656.17	Hspa8	2534.67	2607.82	2069.03	1670.03	1398.68	966.251
40.7619	1.77593	0.406683	-4.36686	1.26043e-05	0.00187879	ENSMUSG00000026124.4	Cfc1	19.8575	17.0563	18.901	78.3535	51.8031	58.6001
228.721	0.994162	0.227936	-4.36157	1.2913e-05	0.00190216	ENSMUSG00000032314.14	Etfa	150.35	148.121	158.769	220.495	350.807	343.787
21.3343	-2.54436	0.584626	4.35212	1.34826e-05	0.00196297	ENSMUSG00000041616.9	Nppa	34.0415	28.7264	45.3624	4.5204	3.63531	11.72
661.404	-0.701348	0.161682	4.33781	1.43908e-05	0.00207111	ENSMUSG00000029838.11	Ptn	738.983	860.895	859.366	546.968	520.758	441.454
397.364	-1.0259	0.238302	4.30502	1.66971e-05	0.00237574	ENSMUSG00000053093.16	Myh7	381.548	768.432	447.324	277.753	231.751	277.374
170.84	1.16095	0.270189	-4.29679	1.73288e-05	0.00240198	ENSMUSG00000024140.10	Epas1	102.124	123.883	88.2047	161.73	232.66	316.441
742.229	1.10678	0.257681	-4.29516	1.74571e-05	0.00240198	ENSMUSG00000035000.8	Dpp4	521.969	384.216	505.287	533.909	1287.81	1220.18
26.4015	-2.42059	0.563141	4.29838	1.72054e-05	0.00240198	ENSMUSG00000027236.8	Eif3j1	42.5518	63.7367	27.7215	12.5567	2.72648	9.11557
1138.89	-0.853294	0.199503	4.2771	1.89346e-05	0.00254925	ENSMUSG00000024598.9	Fbn2	1164.5	1857.34	1378.51	932.708	875.2	625.068
847.825	0.665541	0.155561	-4.27833	1.88303e-05	0.00254925	ENSMUSG00000031383.8	Dusp9	636.859	632.879	695.557	957.822	978.806	1185.02
6851.76	0.874071	0.204607	-4.27194	1.93777e-05	0.00258115	ENSMUSG00000021728.8	Emb	5347.35	4117.75	5046.57	5784.6	11201.3	9613.02
254.103	-0.98556	0.230886	4.26859	1.96709e-05	0.00259262	ENSMUSG00000060600.15	Eno3	317.72	327.661	371.72	229.033	150.865	127.618
149.729	1.03219	0.242319	-4.25965	2.0475e-05	0.0026705	ENSMUSG00000055447.19	Cd47	104.961	93.3609	95.7651	169.766	184.492	250.027
320.174	1.04744	0.246314	-4.25246	2.11438e-05	0.00272929	ENSMUSG00000034903.18	Cobll1	228.361	183.131	214.212	267.708	547.114	480.521
272.432	-0.878275	0.20777	4.22714	2.36681e-05	0.00302396	ENSMUSG00000032126.16	Hmbs	337.578	320.479	403.222	204.925	219.936	148.454
137.541	-1.27793	0.304859	4.19186	2.76681e-05	0.00346748	ENSMUSG00000024247.14	Pkdcc	201.412	181.336	205.391	126.069	56.3473	54.6934
8.1525	-5.76011	1.37419	4.19165	2.76933e-05	0.00346748	ENSMUSG00000031950.7	Gabarapl2	21.2759	17.0563	10.0805	0.502266	0	0
108.382	1.46267	0.349908	-4.18016	2.91307e-05	0.00361134	ENSMUSG00000056737.14	Capg	65.2461	49.3735	57.9631	124.562	92.7003	260.445
558.74	-0.949147	0.227187	4.17783	2.94304e-05	0.00361272	ENSMUSG00000028998.6	Tomm7	763.096	657.117	793.843	542.95	327.178	268.258
1277.55	-0.685454	0.16451	4.16664	3.09122e-05	0.00372165	ENSMUSG00000049775.16	Tmsb4x	1730.44	1465.95	1528.46	969.374	813.4	1157.68
806.999	0.881583	0.211522	-4.16781	3.07543e-05	0.00372165	ENSMUSG00000026576.12	Atp1b1	615.583	497.326	589.712	694.132	1282.35	1162.89
1521.78	-0.879197	0.212189	4.14346	3.42105e-05	0.00407953	ENSMUSG00000099517.2	H3c8	2016.96	1902.23	2000.99	1543.46	799.768	867.282
1025.22	0.738266	0.178466	-4.13673	3.52287e-05	0.00416131	ENSMUSG00000000303.12	Cdh1	809.903	724.444	771.161	1049.74	1614.99	1181.12
1523.76	-0.935241	0.226649	4.12639	3.68503e-05	0.00431217	ENSMUSG00000101355.1	H3c10	2239.64	1872.6	1895.14	1510.31	671.623	953.229
397.643	-0.950635	0.231024	4.11487	3.87394e-05	0.0044742	ENSMUSG00000022400.9	Rbx1	598.562	466.804	511.587	381.22	206.304	221.378
228.384	-0.873758	0.212406	4.11362	3.89496e-05	0.0044742	ENSMUSG00000033106.6	Slc7a6os	313.465	257.64	318.797	190.861	155.409	134.129
199.774	-0.965181	0.23504	4.10645	4.01787e-05	0.00453223	ENSMUSG00000021486.7	Prelid1	239.709	287.264	265.874	160.223	94.518	151.058
29.1416	2.47542	0.602568	-4.10811	3.98903e-05	0.00453223	ENSMUSG00000048373.8	Fgfbp1	12.7655	9.87471	3.7802	41.1858	19.9942	87.2491
112.942	1.17743	0.287317	-4.09803	4.16689e-05	0.00465836	ENSMUSG00000031844.8	Hsd17b2	59.5726	69.1229	78.1242	111.503	201.76	157.569
40.537	1.80946	0.442224	-4.09172	4.28185e-05	0.00474451	ENSMUSG00000023959.10	Clic5	17.0207	23.3402	12.6007	39.1768	78.1591	72.9246
20.5731	2.66058	0.651564	-4.08337	4.43864e-05	0.00487511	ENSMUSG00000018507.16	Trpv2	2.83679	7.1816	6.30034	35.1586	17.2677	54.6934
490.835	-0.865737	0.212188	4.08004	4.50272e-05	0.00490249	ENSMUSG00000040752.16	Myh6	517.714	867.179	514.108	340.034	333.539	372.436
76.1631	-1.43148	0.351782	4.06921	4.71735e-05	0.00509189	ENSMUSG00000035150.15	Eif2s3x	144.676	98.7471	91.9849	59.2674	24.5383	37.7645
25.2593	2.56559	0.632386	-4.057	4.97081e-05	0.00527453	ENSMUSG00000030103.11	Bhlhe40	9.92876	8.07931	3.7802	46.2085	14.5412	69.0179
633.874	0.707612	0.174414	-4.05708	4.96895e-05	0.00527453	ENSMUSG00000068566.12	Myadm	538.99	476.679	429.683	868.418	653.446	836.028
873.409	1.00903	0.24889	-4.05413	5.03215e-05	0.00529475	ENSMUSG00000031434.15	Morc4	567.358	522.462	648.935	666.507	1693.14	1142.05
348.01	0.839231	0.207152	-4.05127	5.09395e-05	0.00529976	ENSMUSG00000040363.15	Bcor	285.097	247.765	214.212	351.084	450.778	539.121
340.652	0.789471	0.194931	-4.05001	5.12157e-05	0.00529976	ENSMUSG00000038383.16	Pigu	256.729	242.379	248.233	344.555	448.052	503.961
234.114	0.91564	0.226582	-4.04109	5.32031e-05	0.00546029	ENSMUSG00000063663.11	Brwd3	136.166	184.029	165.069	262.183	388.978	268.258
13.7583	4.0238	0.99627	-4.03886	5.37111e-05	0.00546762	ENSMUSG00000025473.16	Adam8	2.83679	0.897701	1.26007	25.6156	6.36179	45.5779
68.7165	-1.40601	0.348289	4.0369	5.41631e-05	0.00546916	ENSMUSG00000053080.10	2700081O15Rik	72.3381	101.44	126.007	47.213	23.6295	41.6712
566.994	0.792279	0.196449	-4.033	5.50701e-05	0.00551605	ENSMUSG00000007891.16	Ctsd	428.355	390.5	424.643	520.85	801.585	836.028
617.638	-0.900313	0.22334	4.03113	5.55085e-05	0.00551605	ENSMUSG00000078249.5	Hmga1b	885.078	784.59	748.48	617.285	343.536	326.858
318.179	0.894413	0.221987	-4.02913	5.59842e-05	0.00551951	ENSMUSG00000028583.14	Pdpn	211.341	202.88	252.014	292.821	461.684	488.334
86.9258	1.30338	0.324101	-4.02151	5.78265e-05	0.0056566	ENSMUSG00000006205.13	Htra1	46.807	60.1459	41.5822	95.4306	101.789	175.8
55.0899	-1.40864	0.351327	4.00949	6.08503e-05	0.00590625	ENSMUSG00000030470.15	Csrp3	83.6852	82.5885	75.6041	40.6836	24.5383	23.44
65.2654	1.46944	0.367076	-4.0031	6.25177e-05	0.00598548	ENSMUSG00000010064.15	Slc38a3	26.9495	46.6804	28.9816	106.983	60.8914	121.107
114.806	-1.05602	0.263827	4.0027	6.26226e-05	0.00598548	ENSMUSG00000026208.9	Des	137.584	149.916	178.93	90.4079	59.0737	72.9246
70.2013	1.38774	0.348571	-3.98123	6.85586e-05	0.00644703	ENSMUSG00000017737.2	Mmp9	39.715	36.8057	40.3222	127.576	60.8914	115.898
17.765	-2.69445	0.677044	3.97972	6.89962e-05	0.00644703	ENSMUSG00000037772.13	Mrpl23	24.1127	34.1126	34.0218	6.52946	0	7.81335
182.894	-1.06643	0.26777	3.98265	6.81523e-05	0.00644703	ENSMUSG00000040466.16	Blvrb	236.872	201.983	307.457	148.169	129.962	72.9246
21.0033	-2.20692	0.555373	3.97375	7.07491e-05	0.00651703	ENSMUSG00000007122.11	Casq1	41.1334	30.5218	32.7618	10.5476	4.54413	6.51112
173.739	-1.14942	0.289389	3.97188	7.13068e-05	0.00651703	ENSMUSG00000031274.16	Col4a5	243.964	260.333	217.992	167.757	78.1591	74.2268
969.301	-0.717738	0.180694	3.97211	7.12389e-05	0.00651703	ENSMUSG00000020469.8	Myl7	1231.17	1168.81	1217.23	836.273	538.025	824.308
198.14	-0.913245	0.231017	3.95315	7.71306e-05	0.00694786	ENSMUSG00000021018.8	Polr2h	263.821	250.458	265.874	178.304	123.6	106.782
711.748	-0.748687	0.189358	3.95382	7.69141e-05	0.00694786	ENSMUSG00000042462.4	Dctpp1	961.671	808.828	911.029	678.562	429.875	480.521
392.826	-0.722327	0.182899	3.94931	7.83766e-05	0.00700967	ENSMUSG00000024258.4	Polr2d	554.592	475.781	438.504	327.98	255.38	304.721
1467.45	0.585057	0.148637	-3.93614	8.28012e-05	0.00735287	ENSMUSG00000038633.5	Degs1	1215.56	1107.76	1197.06	1521.36	1842.19	1920.78
1215.69	-0.552102	0.140373	3.9331	8.38568e-05	0.00739416	ENSMUSG00000071547.4	Nt5dc2	1404.21	1486.59	1447.82	1066.81	970.627	918.069
455.249	0.816666	0.207731	-3.93136	8.44679e-05	0.00739597	ENSMUSG00000020330.16	Hmmr	331.904	327.661	328.878	442.999	766.141	533.912
18758.5	0.632758	0.161244	-3.92423	8.70093e-05	0.00754253	ENSMUSG00000003153.10	Slc2a3	14500.2	14529.3	15100.7	22505	27856.4	18059.3
86.9169	-1.40807	0.3589	3.92329	8.73466e-05	0.00754253	ENSMUSG00000038845.11	Phb	151.768	103.236	127.267	77.349	34.5354	27.3467
288.525	-0.885418	0.22603	3.91726	8.95618e-05	0.00768085	ENSMUSG00000004891.16	Nes	356.017	447.055	322.577	239.079	224.48	141.943
49.2819	1.75576	0.448907	-3.91119	9.18441e-05	0.00782299	ENSMUSG00000071235.12	Vrtn	41.1334	13.4655	13.8607	49.2221	88.1562	89.8535
332.118	0.962221	0.246505	-3.90346	9.48285e-05	0.00802262	ENSMUSG00000027082.15	Tfpi	252.474	150.814	273.435	317.432	518.031	480.521
1979.99	0.696123	0.178971	-3.88959	0.000100413	0.00843809	ENSMUSG00000041688.16	Amot	1443.93	1677.8	1411.28	2138.15	3149.99	2058.82
93.7322	-1.37725	0.35617	3.86683	0.000110257	0.00920352	ENSMUSG00000070803.6	Cited4	174.462	116.701	118.446	79.3581	49.9855	23.44
1473.91	0.623151	0.1613	-3.86331	0.000111862	0.00927563	ENSMUSG00000052397.8	Ezr	1191.45	1183.17	1106.34	1571.09	2167.55	1623.87
86.6647	1.26393	0.32764	-3.85768	0.00011447	0.00936784	ENSMUSG00000005148.8	Klf5	55.3174	40.3965	56.703	83.3762	113.603	170.591
37.0246	-1.60193	0.415206	3.85816	0.000114246	0.00936784	ENSMUSG00000038086.4	Hspb2	63.8277	49.3735	55.443	23.6065	18.1765	11.72
79.725	-1.16205	0.301509	3.85411	0.000116153	0.00944381	ENSMUSG00000055027.17	Smyd1	99.2876	105.929	127.267	62.7833	42.7149	40.369
2820.37	0.557815	0.144911	-3.84936	0.000118426	0.00956653	ENSMUSG00000032116.18	Stt3a	2338.93	2232.58	2271.9	2843.83	3622.58	3612.37
150.265	-1.33011	0.346009	3.84414	0.000120977	0.00970993	ENSMUSG00000041571.9	Selenow	273.75	171.461	204.131	145.657	63.6179	42.9734
1711.42	0.567329	0.147747	-3.83986	0.000123106	0.00978465	ENSMUSG00000021427.10	Ssr1	1391.44	1333.98	1410.02	1749.9	2121.2	2261.96
107.438	-1.02497	0.266981	3.83913	0.000123471	0.00978465	ENSMUSG00000011179.8	Odc1	124.819	176.847	131.047	81.3671	65.4355	65.1112
596.481	0.696751	0.181786	-3.8328	0.000126692	0.0099768	ENSMUSG00000056537.11	Rlim	401.406	472.191	488.906	589.158	792.497	834.726
13.4147	3.95884	1.03361	-3.83013	0.000128075	0.0100227	ENSMUSG00000030162.14	Olr1	0	0	5.04027	19.0861	8.17944	48.1823
26.5262	2.13271	0.558389	-3.81939	0.000133782	0.0103362	ENSMUSG00000014813.9	Stc1	7.09197	11.6701	10.0805	34.1541	24.5383	71.6224
593.867	0.804412	0.210537	-3.82076	0.000133039	0.0103362	ENSMUSG00000031765.8	Mt1	479.417	366.262	451.104	675.548	581.649	1009.22
987.929	-0.790734	0.207206	3.81618	0.000135533	0.0103362	ENSMUSG00000118552.1	AC124742.1	1321.94	1026.07	1412.54	960.835	540.752	665.437
15.821	-2.84926	0.746867	3.81495	0.000136209	0.0103362	ENSMUSG00000020224.15	Llph	36.8782	31.4195	16.3809	8.03626	0.908827	1.30222
233.281	0.825212	0.216249	-3.81602	0.000135621	0.0103362	ENSMUSG00000056492.6	Adgrf5	180.136	170.563	153.728	308.391	232.66	354.205
10.6698	5.6107	1.47142	-3.81311	0.00013723	0.0103509	ENSMUSG00000021404.12	Serpinb9c	0	0	1.26007	10.5476	2.72648	49.4845
181.353	0.869707	0.228235	-3.81058	0.000138639	0.0103946	ENSMUSG00000020142.12	Slc1a4	120.563	128.371	137.347	273.233	246.292	182.311
916.587	0.693235	0.182069	-3.80754	0.000140353	0.0104605	ENSMUSG00000024413.14	Npc1	753.167	701.104	645.155	851.341	1286.9	1261.86
447.974	-0.783504	0.205871	3.80581	0.000141342	0.0104718	ENSMUSG00000019362.8	D8Ertd738e	621.257	436.282	646.415	400.306	285.372	298.21
58.9592	-1.22756	0.323398	3.7958	0.000147167	0.0108393	ENSMUSG00000027223.15	Mapk8ip1	85.1036	80.7931	83.1645	39.1768	38.1707	27.3467
92.9403	-1.21508	0.320261	3.79405	0.00014821	0.0108522	ENSMUSG00000087260.5	Lamtor5	156.023	120.292	115.926	80.8649	36.3531	48.1823
92.1095	1.36535	0.360403	-3.78839	0.000151628	0.0109315	ENSMUSG00000015053.14	Gata2	65.2461	54.7597	34.0218	130.589	72.7061	195.334
190.504	-0.803524	0.212128	3.78792	0.000151912	0.0109315	ENSMUSG00000037013.17	Ss18	270.913	211.857	243.193	127.073	136.324	153.663
63.4055	-1.43928	0.379947	3.7881	0.000151804	0.0109315	ENSMUSG00000073838.10	Tufm	121.982	105.929	51.6628	44.7017	32.7178	23.44
219.275	-0.931091	0.245914	3.78624	0.000152943	0.0109428	ENSMUSG00000029223.12	Uchl1	278.005	262.129	326.358	207.938	113.603	127.618
3245.9	-0.751176	0.198837	3.77786	0.000158184	0.011119	ENSMUSG00000096010.2	H4f16	4170.08	3819.72	4232.57	3378.24	1857.64	2017.15
3431.06	0.677795	0.17943	-3.7775	0.000158414	0.011119	ENSMUSG00000000805.18	Car4	2862.32	2416.61	2638.58	3069.85	5020.36	4578.62
1353	0.620796	0.164378	-3.77664	0.000158957	0.011119	ENSMUSG00000019818.15	Cd164	1173.01	945.279	1079.88	1356.62	1704.96	1858.27
1273.27	-0.635259	0.168205	3.77669	0.000158924	0.011119	ENSMUSG00000024393.14	Prrc2a	1513.43	1759.49	1377.25	1128.59	1046.97	813.891
193.653	0.864849	0.229238	-3.7727	0.000161488	0.0112333	ENSMUSG00000079445.3	B3gnt7	168.789	125.678	119.706	297.342	229.024	221.378
125.536	-1.26387	0.335456	3.76762	0.000164808	0.0114009	ENSMUSG00000060032.6	H2aj	212.759	199.29	122.227	115.019	42.7149	61.2046
538.416	0.667942	0.177516	-3.76271	0.000168079	0.0114716	ENSMUSG00000075703.15	Selenoi	451.049	413.84	383.061	584.638	789.77	608.139
823.465	-0.686612	0.18271	3.75793	0.000171327	0.0114716	ENSMUSG00000019505.7	Ubb	1049.61	950.665	1052.16	804.63	558.928	524.797
1329.46	-0.804933	0.214064	3.76024	0.00016975	0.0114716	ENSMUSG00000063457.14	Rps15	1682.22	1895.94	1499.48	1377.21	786.135	735.757
105.854	3.42296	0.909798	-3.76232	0.000168342	0.0114716	ENSMUSG00000001123.15	Lgals9	24.1127	12.5678	17.6409	129.585	43.6237	407.596
676.691	0.80861	0.2151	-3.75923	0.000170439	0.0114716	ENSMUSG00000032883.15	Acsl3	526.224	470.395	477.566	564.547	1094.23	927.184
354.168	-0.819272	0.217825	3.76115	0.000169136	0.0114716	ENSMUSG00000034345.14	Gtf2h5	469.488	361.773	529.228	326.473	224.48	213.565
38.7354	1.90672	0.508	-3.75338	0.000174467	0.0116197	ENSMUSG00000035540.12	Gc	17.0207	16.1586	16.3809	109.494	29.0825	44.2756
13.3387	-3.00784	0.802373	3.74868	0.000177766	0.0117768	ENSMUSG00000058927.6	Gm10053	28.3679	21.5448	22.6812	6.52946	0.908827	0
27.4881	1.95829	0.522824	-3.7456	0.000179964	0.0118596	ENSMUSG00000022445.7	Cyp2d26	18.4391	11.6701	3.7802	41.6881	37.2619	52.089
75.0192	-1.06855	0.285713	3.73996	0.00018405	0.0120654	ENSMUSG00000034248.7	Slc25a37	97.8692	107.724	99.5453	51.2311	48.1678	45.5779
871.048	0.77444	0.207373	-3.73453	0.000188068	0.0122646	ENSMUSG00000005656.9	Snx6	727.636	611.334	587.192	745.865	1186.93	1367.34
262.858	-0.864389	0.232015	3.72558	0.00019487	0.0126423	ENSMUSG00000027076.10	Timm10	336.159	282.776	401.962	239.581	140.868	175.8
47.5256	-1.4103	0.379187	3.71927	0.000199803	0.0128955	ENSMUSG00000069171.14	Nr2f1	63.8277	55.6574	88.2047	30.6382	18.1765	28.6489
17.8435	-2.5462	0.685466	3.71455	0.000203566	0.013071	ENSMUSG00000057123.14	Gja5	25.5311	23.3402	44.1024	9.54306	4.54413	0
106.272	-1.05289	0.28376	3.71051	0.000206842	0.0132136	ENSMUSG00000004415.15	Col26a1	121.982	156.2	153.728	91.4124	51.8031	62.5068
95.89	-0.997421	0.269153	3.70577	0.000210749	0.0133949	ENSMUSG00000042834.15	Nrep	117.727	131.064	136.087	73.3309	66.3443	50.7868
66.2204	3.55046	0.958718	-3.70334	0.000212782	0.0134557	ENSMUSG00000021440.7	Cts7	9.92876	6.2839	15.1208	51.2311	39.9884	274.769
445.932	0.654679	0.176953	-3.69973	0.000215825	0.0135796	ENSMUSG00000031007.2	Atp6ap2	351.762	324.968	362.899	486.194	637.996	511.774
74.8171	-1.2023	0.325695	3.69151	0.000222927	0.0139563	ENSMUSG00000078350.11	Smim1	123.4	66.4298	123.487	45.204	40.8972	49.4845
254.38	0.715493	0.19417	-3.68489	0.000228803	0.0140312	ENSMUSG00000004319.15	Clcn3	195.738	184.029	197.831	283.278	358.078	307.325
69.3927	-1.58968	0.431031	3.68809	0.000225948	0.0140312	ENSMUSG00000026532.7	Spta1	75.1749	138.246	98.2853	17.077	65.4355	22.1378
12.0586	-3.69331	1.00222	3.68515	0.00022857	0.0140312	ENSMUSG00000103034.1	Gm8797	24.1127	41.2942	2.52014	3.51586	0.908827	0
340.076	-0.925194	0.251153	3.68379	0.000229791	0.0140312	ENSMUSG00000047721.8	Bola2	496.438	397.681	443.544	295.333	132.689	274.769
75.285	-1.37087	0.372254	3.68262	0.000230847	0.0140312	ENSMUSG00000070858.12	Gm1673	131.911	97.8494	98.2853	66.2991	20.903	36.4623
66.7531	-1.48314	0.402261	3.68703	0.000226891	0.0140312	ENSMUSG00000050114.7	Prdx6b	129.074	74.5092	94.5051	59.2674	23.6295	19.5334
1536.96	0.644469	0.175105	-3.68048	0.0002328	0.0140634	ENSMUSG00000026496.11	Parp1	1187.2	1269.35	1142.88	2006.55	2209.36	1406.4
109.653	0.995207	0.270468	-3.67958	0.000233622	0.0140634	ENSMUSG00000067860.11	Zic3	63.8277	83.4862	71.8239	134.607	181.765	122.409
1853.48	0.515854	0.141031	-3.65774	0.000254446	0.0152317	ENSMUSG00000020585.4	Laptm4a	1619.81	1412.98	1543.58	1977.92	2232.99	2333.59
417.773	-0.688466	0.188274	3.65672	0.000255464	0.0152317	ENSMUSG00000071644.10	Eef1g	575.868	570.938	399.441	322.957	305.366	332.067
277.108	-0.746961	0.204382	3.65473	0.00025745	0.0152774	ENSMUSG00000071652.8	Ints5	330.486	382.42	331.398	254.147	184.492	179.707
65.6487	-1.2746	0.348932	3.65286	0.000259333	0.0153166	ENSMUSG00000051451.6	Crebzf	78.0117	109.519	93.245	54.747	33.6266	24.7423
373.814	-0.855264	0.234938	3.64038	0.000272239	0.0159336	ENSMUSG00000017188.3	Coa3	540.408	432.692	476.306	378.206	219.936	195.334
12.0878	-3.2801	0.901214	3.63964	0.000273018	0.0159336	ENSMUSG00000008450.8	Nutf2	28.3679	26.0333	12.6007	5.52493	0	0
60.7038	-1.53469	0.421722	3.63909	0.000273598	0.0159336	ENSMUSG00000026147.16	Col9a1	86.522	95.1563	91.9849	56.7561	18.1765	15.6267
1440.15	-0.612256	0.168387	3.636	0.000276902	0.0160513	ENSMUSG00000032291.8	Crabp1	1822.64	1727.18	1673.37	1231.05	877.927	1308.74
401.935	-0.803784	0.222036	3.62006	0.000294536	0.0169649	ENSMUSG00000073676.4	Hspe1	564.521	434.487	539.309	379.713	291.733	201.845
619.05	-0.853093	0.235705	3.61933	0.000295371	0.0169649	ENSMUSG00000041881.13	Ndufa7	858.128	693.025	844.245	645.914	304.457	368.53
593.838	0.794969	0.219844	-3.61606	0.000299115	0.0171015	ENSMUSG00000032231.14	Anxa2	448.213	426.408	425.903	639.385	555.293	1067.82
33.5848	5.90533	1.63463	-3.61264	0.000303098	0.0172504	ENSMUSG00000035491.5	Fthl17a	1.41839	1.7954	0	42.6926	4.54413	151.058
73.5196	1.47472	0.408702	-3.60831	0.000308201	0.0174614	ENSMUSG00000006200.3	Rhox6	22.6943	37.7034	55.443	101.458	54.5296	169.289
65.2852	-1.1441	0.31739	3.6047	0.000312516	0.0176262	ENSMUSG00000067889.6	Sptbn2	90.7772	96.9517	83.1645	50.7289	33.6266	36.4623
85.3668	-1.1778	0.327517	3.59614	0.000322977	0.0181345	ENSMUSG00000015745.9	Plekho1	136.166	120.292	100.805	75.3399	32.7178	46.8801
824.227	-0.615521	0.171278	3.5937	0.000326012	0.0181422	ENSMUSG00000040952.16	Rps19	1170.18	851.02	971.512	656.964	571.652	724.037
336.252	5.59915	1.55791	-3.594	0.000325635	0.0181422	ENSMUSG00000007209.4	Ceacam9	19.8575	7.1816	13.8607	93.9238	21.8118	1860.88
303.13	-0.640086	0.178257	3.59081	0.000329652	0.0182636	ENSMUSG00000021607.9	Mrpl36	390.058	350.103	369.2	253.142	224.48	231.796
1359.01	-0.537076	0.150012	3.58022	0.000343303	0.0189361	ENSMUSG00000099583.2	H3c4	1747.46	1529.68	1553.66	1257.17	1015.16	1050.9
556.559	-1.67088	0.467027	3.57769	0.000346638	0.0190362	ENSMUSG00000051747.15	Ttn	648.206	1261.27	630.034	200.906	201.76	397.179
228.151	-0.82897	0.231925	3.5743	0.000351172	0.019201	ENSMUSG00000002768.8	Mea1	299.281	294.446	286.035	218.988	149.048	121.107
312.19	-1.01338	0.284178	3.56601	0.000362451	0.0197315	ENSMUSG00000091337.3	Eid1	408.497	412.942	435.983	333.505	166.315	115.898
78.2424	1.34897	0.378746	-3.56169	0.000368477	0.0199728	ENSMUSG00000000365.9	Rnf17	46.807	39.4988	45.3624	51.7334	145.412	140.64
80.4374	5.41448	1.524	-3.55281	0.000381142	0.0205702	ENSMUSG00000062342.3	Serpinb9e	1.41839	4.4885	5.04027	37.67	8.17944	425.828
117.941	1.09188	0.307463	-3.55126	0.000383388	0.0206026	ENSMUSG00000027215.13	Cd82	97.8692	53.862	74.344	118.535	139.05	223.983
1920.98	0.633684	0.178582	-3.54842	0.000387542	0.0207368	ENSMUSG00000026020.9	Nop58	1533.28	1482.1	1499.48	1696.66	2743.75	2570.59
129.255	-0.902764	0.254584	3.54603	0.000391076	0.0208369	ENSMUSG00000066842.18	Hmcn1	143.258	201.085	158.769	85.3852	76.3414	110.689
306.414	0.668566	0.189022	-3.53698	0.000404727	0.0212383	ENSMUSG00000021831.9	Ero1l	215.596	233.402	260.834	401.813	324.451	402.388
1900.24	0.628031	0.177944	-3.52938	0.000416529	0.0212383	ENSMUSG00000032050.18	Rdx	1492.15	1604.19	1381.03	1831.26	2933.69	2159.09
93.6868	1.02241	0.289695	-3.52926	0.000416719	0.0212383	ENSMUSG00000022054.11	Nefm	51.0622	78.9977	54.1829	118.535	149.956	109.387
1298.45	-0.630173	0.178416	3.53205	0.000412353	0.0212383	ENSMUSG00000063856.7	Gpx1	1555.98	1421.96	1759.05	1277.26	838.847	937.602
570.894	0.75271	0.212773	-3.53762	0.000403754	0.0212383	ENSMUSG00000024044.19	Epb41l3	469.488	386.909	418.342	486.696	885.197	778.731
156.013	-0.835979	0.236404	3.53623	0.000405885	0.0212383	ENSMUSG00000042286.13	Stab1	182.973	219.039	199.091	135.612	89.9738	109.387
213.823	0.692575	0.195904	-3.53528	0.00040735	0.0212383	ENSMUSG00000020183.11	Cpm	156.023	171.461	162.549	262.685	276.283	253.934
64.3669	-1.13662	0.322089	3.52891	0.000417269	0.0212383	ENSMUSG00000000253.13	Gmpr	85.1036	74.5092	107.106	43.6972	44.5325	31.2534
46.8714	1.36086	0.385406	-3.53098	0.000414023	0.0212383	ENSMUSG00000035105.5	Egln3	21.2759	31.4195	25.2014	68.3082	49.0766	85.9468
168.768	-0.869942	0.246195	3.53354	0.000410027	0.0212383	ENSMUSG00000035342.14	Lzts2	192.902	243.277	220.512	156.707	96.3356	102.876
71.5555	3.92426	1.10934	-3.53748	0.000403972	0.0212383	ENSMUSG00000078795.2	Ceacam15	12.7655	2.6931	11.3406	52.7379	37.2619	312.534
220.597	0.826119	0.234653	-3.52059	0.000430581	0.0215495	ENSMUSG00000032849.14	Abcc4	137.584	170.563	167.589	213.965	361.713	272.165
4.83494	5.48135	1.55665	-3.52124	0.000429528	0.0215495	ENSMUSG00000052560.15	Cpne8	0	0	0	11.0499	3.63531	14.3245
25.9961	-1.80342	0.512141	3.52134	0.000429369	0.0215495	ENSMUSG00000073131.12	Vma21	51.0622	23.3402	47.8826	14.0635	11.8147	7.81335
1406.41	0.815634	0.231732	-3.51973	0.000431988	0.0215495	ENSMUSG00000032359.14	Ctsh	1259.53	857.304	940.01	1083.89	2258.43	2039.28
248.593	0.711196	0.20188	-3.52286	0.000426912	0.0215495	ENSMUSG00000048277.15	Syngr2	208.504	187.619	168.849	299.853	269.922	356.81
2018	-0.671141	0.190758	3.51828	0.000434347	0.0215812	ENSMUSG00000069265.2	H3c1	2720.48	2222.71	2498.71	2054.27	1183.29	1428.54
1018.08	-0.829996	0.23617	3.5144	0.000440751	0.0216224	ENSMUSG00000047945.6	Marcksl1	1384.35	1195.74	1334.41	1114.03	513.487	566.468
1380.82	0.618539	0.176042	-3.5136	0.000442085	0.0216224	ENSMUSG00000024827.10	Gldc	1117.69	1067.37	1082.4	1372.19	2132.11	1513.19
164.848	-3.76198	1.07067	3.51367	0.000441964	0.0216224	ENSMUSG00000113061.1	Rps18-ps5	469.488	252.254	200.351	54.2447	3.63531	9.11557
129.155	0.881001	0.250601	-3.51556	0.000438831	0.0216224	ENSMUSG00000031112.10	Stk26	95.0324	88.8724	88.2047	134.105	198.124	170.591
13.5229	2.96036	0.842906	-3.51209	0.000444593	0.0216605	ENSMUSG00000042759.12	Apobr	5.67358	3.5908	0	27.6246	9.08827	35.1601
538.728	0.687976	0.196055	-3.50909	0.00044964	0.0218215	ENSMUSG00000032336.17	Nptn	451.049	355.489	430.943	502.768	770.685	721.433
367.589	0.69995	0.199595	-3.50686	0.000453426	0.0219202	ENSMUSG00000031467.10	Agpat5	251.056	275.594	311.237	366.152	448.052	553.446
281.492	0.632546	0.180557	-3.5033	0.000459539	0.0219618	ENSMUSG00000019647.16	Sema6a	224.106	228.914	209.171	341.039	356.26	329.463
497.346	0.770212	0.219854	-3.50329	0.000459548	0.0219618	ENSMUSG00000021676.10	Iqgap2	348.925	394.988	356.599	415.876	797.041	670.646
3558.24	-0.690077	0.196931	3.50415	0.00045806	0.0219618	ENSMUSG00000006333.14	Rps9	4867.93	4351.15	3966.69	3736.36	2341.14	2086.16
437.068	-0.698917	0.199602	3.50156	0.000462542	0.0220209	ENSMUSG00000041203.9	Trir	544.663	542.211	539.309	430.944	264.469	300.814
1142.32	-0.674173	0.192609	3.50021	0.000464887	0.0220487	ENSMUSG00000069272.6	H2ac8	1530.45	1366.3	1321.81	1175.3	742.511	717.526
87.5824	-1.06626	0.304785	3.49841	0.000468038	0.0221143	ENSMUSG00000019659.8	Ccdc12	126.237	105.929	124.747	72.3263	36.3531	59.9023
186.424	-0.760082	0.217908	3.48808	0.000486496	0.0229001	ENSMUSG00000028410.13	Dnaja1	248.219	236.993	220.512	156.205	147.23	109.387
184.766	-0.870933	0.249765	3.48701	0.000488457	0.0229062	ENSMUSG00000019689.4	Fmc1	252.474	217.244	250.753	179.309	107.242	101.574
335.127	0.643002	0.18447	-3.48566	0.000490916	0.0229357	ENSMUSG00000031232.17	Magt1	239.709	268.412	275.955	369.668	468.955	388.063
533.112	-0.605765	0.17385	3.4844	0.000493238	0.0229585	ENSMUSG00000084786.9	Ubl5	700.687	569.142	660.275	428.935	361.713	477.917
78.2707	-1.1636	0.334165	3.4821	0.000497502	0.0230712	ENSMUSG00000016763.15	Scube1	75.1749	113.11	136.087	55.7515	30.9001	58.6001
151.201	-0.79242	0.227912	3.47687	0.000507306	0.0234391	ENSMUSG00000024803.9	Ankrd1	167.37	204.676	204.131	120.544	115.421	95.0624
289.676	0.683926	0.196942	-3.47272	0.000515212	0.0237168	ENSMUSG00000073725.8	Lmbrd1	253.893	199.29	214.212	311.907	407.154	351.601
115.564	-1.02657	0.295941	3.46882	0.000522752	0.0239758	ENSMUSG00000027848.12	Olfml3	154.605	150.814	162.549	111.503	52.7119	61.2046
245.339	-0.795072	0.229806	3.45975	0.00054068	0.0247075	ENSMUSG00000028797.20	Tmem234	316.302	278.287	342.738	237.572	140.868	156.267
318.822	0.679314	0.196749	-3.45269	0.000555023	0.025146	ENSMUSG00000062169.13	Cnih4	235.453	229.811	268.394	323.459	393.522	462.29
477.038	-0.64962	0.188315	3.44964	0.000561345	0.025146	ENSMUSG00000049401.10	Ogfr	570.194	597.869	583.411	467.108	318.089	325.556
605.639	-0.813508	0.235685	3.45167	0.000557123	0.025146	ENSMUSG00000067786.16	Nnat	754.586	671.48	894.648	642.398	321.725	348.996
71.9164	1.1292	0.327474	-3.4482	0.000564335	0.025146	ENSMUSG00000067931.6	Zfp948	53.899	38.6011	42.8423	70.3173	119.056	106.782
5.98001	5.75437	1.66763	-3.45063	0.00055928	0.025146	ENSMUSG00000000817.10	Fasl	0	0	0	1.5068	1.81765	32.5556
26.4434	-1.68612	0.488863	3.44907	0.000562517	0.025146	ENSMUSG00000037239.8	Spred3	53.899	38.6011	28.9816	15.068	9.08827	13.0222
142.664	-0.85735	0.248492	3.45022	0.000560137	0.025146	ENSMUSG00000025156.17	Gps1	209.922	173.256	171.369	126.571	95.4268	79.4357
60.6198	1.41567	0.4109	-3.44529	0.000570456	0.0253286	ENSMUSG00000035441.14	Myo1d	36.8782	35.908	25.2014	52.2357	66.3443	147.151
18.7451	2.20732	0.641915	-3.43865	0.000584617	0.0258657	ENSMUSG00000059334.6	Zfp36l3	4.25518	9.87471	5.04027	21.0952	22.7207	49.4845
31.3719	8.18415	2.38193	-3.43593	0.000590534	0.0259607	ENSMUSG00000057446.3	Cts8	0	0	0	8.03626	10.9059	169.289
112.855	1.16432	0.338884	-3.43575	0.000590912	0.0259607	ENSMUSG00000000594.7	Gm2a	49.6438	67.3275	90.7249	140.635	91.7915	237.005
339.617	-0.817433	0.238052	3.43384	0.000595105	0.0260535	ENSMUSG00000034845.6	Plvap	452.468	377.932	472.525	333.002	160.862	240.912
538.939	0.582713	0.169815	-3.43145	0.000600363	0.0261922	ENSMUSG00000037936.15	Scarb1	479.417	371.648	444.804	591.67	698.888	647.206
169.458	-0.911973	0.266068	3.42759	0.000608966	0.0263181	ENSMUSG00000022427.4	Tomm22	208.504	205.573	252.014	159.721	76.3414	114.596
47.4375	-1.33975	0.390902	3.42733	0.000609555	0.0263181	ENSMUSG00000027966.20	Col11a1	72.3381	78.1	55.443	37.67	25.4471	15.6267
11.1442	-2.5866	0.754302	3.42913	0.000605527	0.0263181	ENSMUSG00000041453.12	Rpl21	22.6943	14.3632	20.1611	3.0136	2.72648	3.90667
680.255	-0.76807	0.224218	3.42555	0.000613559	0.0263999	ENSMUSG00000008668.15	Rps18	836.852	796.26	942.531	716.232	350.807	438.85
204.655	-1.09494	0.31984	3.4234	0.000618421	0.026518	ENSMUSG00000027940.18	Tpm3	287.934	285.469	265.874	214.468	60.8914	113.294
10694.8	0.59754	0.174674	-3.42089	0.000624156	0.0266725	ENSMUSG00000026234.12	Ncl	8179.88	8598.18	8754.95	10819.3	16886.9	10929.6
111.698	3.04716	0.891757	-3.41702	0.000633101	0.0266904	ENSMUSG00000050335.17	Lgals3	14.1839	35.0103	22.6812	138.123	49.9855	410.201
80.8609	-0.98125	0.287048	3.41842	0.000629863	0.0266904	ENSMUSG00000043668.13	Tox3	117.727	115.803	89.4648	61.2765	52.7119	48.1823
219.271	-0.713895	0.208808	3.41891	0.000628733	0.0266904	ENSMUSG00000054640.15	Slc8a1	265.24	307.911	245.713	191.866	159.045	145.849
398.033	-0.597947	0.174961	3.41761	0.00063174	0.0266904	ENSMUSG00000027750.16	Postn	418.426	494.633	522.928	301.36	304.457	346.392
548.279	0.641457	0.187922	-3.41341	0.000641542	0.0269555	ENSMUSG00000019802.13	Sec63	407.079	451.543	423.383	508.293	738.876	760.499
150.934	0.95587	0.280177	-3.41166	0.000645677	0.0270385	ENSMUSG00000022218.16	Tgm1	110.635	98.7471	97.0252	131.091	188.127	279.978
644.992	-0.573908	0.168334	3.40934	0.000651196	0.0271787	ENSMUSG00000006412.10	Pfdn2	791.464	693.923	832.905	599.706	466.228	485.73
479.126	0.595602	0.175108	-3.40133	0.000670586	0.0275101	ENSMUSG00000040010.10	Slc7a5	378.711	391.397	376.76	676.05	554.384	497.45
55.438	-1.20262	0.353457	3.40245	0.000667849	0.0275101	ENSMUSG00000020475.3	Pgam2	70.9197	77.2023	83.1645	36.1632	20.903	44.2756
2432.09	0.467069	0.137303	-3.40173	0.000669605	0.0275101	ENSMUSG00000023043.7	Krt18	2185.75	1953.4	1985.87	2564.57	2996.4	2906.57
969.86	0.547653	0.161045	-3.40063	0.000672317	0.0275101	ENSMUSG00000041438.8	Utp4	770.188	818.703	772.421	954.306	1295.08	1208.46
26.3768	-1.67265	0.491241	3.40494	0.000661781	0.0275101	ENSMUSG00000024845.17	Tmem134	42.5518	35.0103	42.8423	14.5657	6.36179	16.9289
349.489	0.67684	0.198871	-3.40342	0.000665484	0.0275101	ENSMUSG00000037458.15	Azin1	262.403	256.742	286.035	331.496	477.134	483.125
571.055	0.543247	0.159975	-3.39582	0.000684244	0.0278163	ENSMUSG00000032553.14	Srprb	506.367	451.543	435.983	619.294	703.432	709.713
26.8734	1.90025	0.55946	-3.39658	0.000682336	0.0278163	ENSMUSG00000003541.6	Ier3	12.7655	8.97701	12.6007	53.2402	16.3589	57.2979
2368.29	0.637952	0.188035	-3.39273	0.000691992	0.0280402	ENSMUSG00000035726.8	Supt16	1731.86	1986.61	1838.44	2140.16	3768.9	2743.79
234.003	-0.97453	0.287733	3.38692	0.000706819	0.0285487	ENSMUSG00000060126.14	Tpt1	346.088	336.638	249.493	225.015	82.7032	164.08
149.793	1.02979	0.304795	-3.37863	0.000728484	0.0293291	ENSMUSG00000027506.15	Tpd52	97.8692	95.1563	100.805	106.983	224.48	273.467
719.059	0.639663	0.18938	-3.37766	0.000731044	0.0293378	ENSMUSG00000028343.10	Erp44	548.918	552.086	583.411	640.892	1030.61	958.438
212.378	0.737451	0.218407	-3.37649	0.00073416	0.0293687	ENSMUSG00000022021.14	Diaph3	130.492	185.824	158.769	226.02	285.372	287.792
107.344	1.05647	0.313114	-3.37406	0.000740687	0.0295355	ENSMUSG00000029994.17	Anxa4	79.4301	69.1229	59.2232	101.458	119.965	214.867
7.87882	-3.74861	1.11419	3.36441	0.000767072	0.0304905	ENSMUSG00000000579.14	Dynlt1c	25.5311	11.6701	7.56041	2.51133	0	0
161.114	-0.946068	0.281795	3.35729	0.000787096	0.0310474	ENSMUSG00000025270.13	Alas2	208.504	199.29	228.072	76.3445	167.224	87.2491
1814.66	-0.740569	0.220618	3.35679	0.000788522	0.0310474	ENSMUSG00000101972.1	H3c11	2435.38	2123.96	2254.26	1804.14	814.309	1455.89
54.6022	1.44343	0.429801	-3.35837	0.000784022	0.0310474	ENSMUSG00000012282.2	Wnt8a	55.3174	21.5448	12.6007	84.883	88.1562	65.1112
1790.12	0.493108	0.14696	-3.35539	0.000792529	0.0311074	ENSMUSG00000079111.3	Kdelr2	1516.26	1443.5	1499.48	1896.56	1966.7	2418.23
1794.54	-0.726781	0.216814	3.3521	0.000802019	0.0312837	ENSMUSG00000001435.15	Col18a1	2302.05	2332.23	2082.89	1905.1	1266	879.002
46.6327	-1.80494	0.538377	3.35255	0.000800698	0.0312837	ENSMUSG00000020460.15	Rps27a	93.614	59.2482	66.7836	42.1904	3.63531	14.3245
370.333	0.729578	0.217819	-3.34947	0.000809674	0.0314842	ENSMUSG00000020671.9	Rab10	280.842	285.469	267.134	315.925	524.393	548.237
119.397	0.79947	0.23891	-3.34633	0.000818891	0.0317441	ENSMUSG00000040195.11	Nemp1	83.6852	91.5655	85.6846	147.164	157.227	151.058
429.571	0.636939	0.190607	-3.34163	0.000832869	0.0321863	ENSMUSG00000029012.11	Orc5	344.67	313.298	349.039	410.351	548.023	612.046
180.152	0.718327	0.215128	-3.33907	0.000840596	0.0323466	ENSMUSG00000046718.8	Bst2	158.86	126.576	123.487	212.961	218.118	240.912
695.839	0.772409	0.231361	-3.33854	0.000842184	0.0323466	ENSMUSG00000031871.9	Cdh5	534.735	509.894	495.207	807.142	566.199	1261.86
10.8951	-2.68052	0.803411	3.33642	0.000848642	0.032495	ENSMUSG00000091955.2	Gm9844	26.9495	17.0563	12.6007	2.00906	5.45296	1.30222
852.288	0.514933	0.154791	-3.32664	0.000878989	0.0334523	ENSMUSG00000015837.15	Sqstm1	716.289	683.15	704.378	945.767	914.28	1149.86
27.4673	1.76539	0.530575	-3.32731	0.000876874	0.0334523	ENSMUSG00000024521.8	Pmaip1	17.0207	14.3632	6.30034	43.6972	59.9826	23.44
157.94	0.828016	0.249054	-3.32465	0.000885305	0.0335906	ENSMUSG00000047789.5	Slc38a9	139.003	101.44	100.805	155.2	227.207	223.983
168.392	0.864185	0.260022	-3.3235	0.000888941	0.0336267	ENSMUSG00000010830.8	Kdelr3	120.563	118.496	117.186	151.684	208.121	294.303
485.647	-0.66751	0.201316	3.31574	0.000914022	0.0344713	ENSMUSG00000020440.13	Arf5	662.39	504.508	623.733	452.542	282.645	388.063
6651.84	0.602184	0.181797	-3.31239	0.000925019	0.0347813	ENSMUSG00000021477.9	Ctsl	5798.39	4347.56	5704.33	6053.31	9656.28	8351.17
8.17061	-3.11297	0.940155	3.31112	0.000929225	0.0348348	ENSMUSG00000028626.5	Col9a2	19.8575	14.3632	10.0805	2.51133	0.908827	1.30222
406.932	0.709403	0.21445	-3.30802	0.000939592	0.0349099	ENSMUSG00000000958.10	Slc7a7	356.017	238.788	332.658	395.283	616.185	502.659
229.616	-0.854328	0.25822	3.30852	0.000937901	0.0349099	ENSMUSG00000060073.9	Psma3	347.507	242.379	301.156	232.047	121.783	132.827
520.224	-0.686247	0.207385	3.30904	0.000936156	0.0349099	ENSMUSG00000026185.8	Igfbp5	622.675	700.206	606.093	536.42	340.81	315.138
271.777	0.685202	0.207283	-3.30563	0.000947615	0.0351038	ENSMUSG00000023921.9	Mmut	215.596	200.187	207.911	259.672	364.44	382.854
16.8104	2.54394	0.770077	-3.30349	0.000954892	0.035269	ENSMUSG00000028836.14	Slc30a2	8.51036	2.6931	3.7802	18.5838	9.99709	57.2979
304.771	0.715959	0.216936	-3.30032	0.000965731	0.0355645	ENSMUSG00000017144.8	Rnd3	226.943	212.755	250.753	273.233	432.602	432.339
1148.86	0.450531	0.136652	-3.29692	0.000977498	0.0358499	ENSMUSG00000031708.17	Tecr	984.365	988.368	940.01	1359.63	1276.9	1343.9
199.738	-0.988507	0.299872	3.29643	0.000979208	0.0358499	ENSMUSG00000035799.6	Twist1	314.883	289.957	195.31	208.943	89.065	100.271
3390.49	-0.721072	0.218857	3.29473	0.00098518	0.0359634	ENSMUSG00000060981.7	H4c8	3957.32	3398.69	5311.19	3526.41	2318.42	1830.93
159.425	0.746357	0.226657	-3.29289	0.000991632	0.0360937	ENSMUSG00000033906.5	Zdhhc15	109.216	129.269	117.186	170.77	221.754	208.356
1958.89	0.49101	0.149401	-3.28653	0.00101429	0.0368113	ENSMUSG00000011114.18	Tbrg1	1748.88	1437.22	1699.83	2060.8	2262.07	2544.55
59.2845	-1.12604	0.343258	3.28044	0.00103646	0.0375074	ENSMUSG00000071256.4	Zfp213	85.1036	73.6115	86.9447	50.2266	27.2648	32.5556
200.808	-0.849845	0.259215	3.27854	0.00104347	0.0376523	ENSMUSG00000043866.11	Taf10	260.985	220.834	294.856	185.838	89.9738	152.36
37.6584	-1.40629	0.429518	3.27411	0.00105994	0.0381127	ENSMUSG00000025478.15	Dpysl4	60.9909	53.862	49.1426	24.611	9.99709	27.3467
27.5999	1.63838	0.5005	-3.27348	0.00106232	0.0381127	ENSMUSG00000021539.9	Lect2	15.6023	15.2609	8.82047	28.6292	39.9884	57.2979
366.905	-0.702621	0.214718	3.2723	0.00106676	0.0381626	ENSMUSG00000047844.3	Bex4	490.764	347.41	529.228	317.432	301.73	214.867
11124.7	0.558805	0.170984	-3.26818	0.00108241	0.0386123	ENSMUSG00000028645.11	Slc2a1	8621	9977.94	8393.31	15880.1	13834.2	10041.5
319.501	-0.750965	0.2303	3.26081	0.00111093	0.0387901	ENSMUSG00000032085.5	Tagln	456.723	369.853	380.54	325.971	208.121	175.8
2534.89	0.447846	0.137184	-3.26455	0.00109637	0.0387901	ENSMUSG00000030082.14	Sec61a1	2277.94	2144.61	2013.59	3122.09	2994.58	2656.54
82.2608	-0.987165	0.302328	3.26521	0.00109383	0.0387901	ENSMUSG00000002393.14	Nr2f6	97.8692	103.236	126.007	55.7515	39.0795	71.6224
14.8302	-2.21923	0.67995	3.26382	0.00109922	0.0387901	ENSMUSG00000058258.14	Idi1	28.3679	20.6471	25.2014	9.04079	1.81765	3.90667
701.473	0.622622	0.191023	-3.2594	0.00111648	0.0387901	ENSMUSG00000020097.14	Sgpl1	639.696	516.178	501.507	683.082	1059.69	808.682
365.977	-0.693461	0.212844	3.25808	0.0011217	0.0387901	ENSMUSG00000038374.10	Rbm8a	520.551	413.84	425.903	360.125	216.301	259.143
658.35	-1.85881	0.570652	3.25735	0.00112458	0.0387901	ENSMUSG00000069306.5	Hist1h4m	1218.4	1206.51	672.876	496.239	158.136	197.938
363.968	-0.682209	0.209104	3.26254	0.00110419	0.0387901	ENSMUSG00000029146.14	Snx17	446.794	413.84	488.906	365.147	239.93	229.192
181.707	1.91963	0.588538	-3.2617	0.00110747	0.0387901	ENSMUSG00000042367.12	Gjb3	112.053	65.5321	50.4027	213.965	159.954	488.334
13.5279	2.33367	0.715701	-3.26067	0.00111148	0.0387901	ENSMUSG00000030732.13	Chrdl2	5.67358	6.2839	1.26007	23.6065	20.903	23.44
69.6077	-1.09435	0.335724	3.25968	0.00111539	0.0387901	ENSMUSG00000021200.14	Asb2	83.6852	94.2586	107.106	56.7561	26.356	49.4845
824.968	-0.605528	0.185885	3.25755	0.0011238	0.0387901	ENSMUSG00000026965.12	Anapc2	992.876	1017.09	981.593	827.735	634.361	496.148
152.189	1.02169	0.313789	-3.256	0.00112994	0.0388682	ENSMUSG00000040181.14	Fmo1	68.0829	116.701	114.666	118.535	288.098	207.054
277.869	-0.850196	0.261191	3.25507	0.00113363	0.0388883	ENSMUSG00000021606.8	Ndufs6	360.272	334.842	381.8	299.853	156.318	134.129
6.04004	4.78668	1.47251	-3.25069	0.00115126	0.0393464	ENSMUSG00000032122.15	Slc37a2	0	0.897701	0	8.53852	7.27061	19.5334
203.845	0.728261	0.224067	-3.25019	0.00115327	0.0393464	ENSMUSG00000028228.5	Cpne3	140.421	165.177	152.468	196.386	280.827	287.792
71.6964	-1.00226	0.308995	3.24362	0.0011802	0.0401557	ENSMUSG00000036422.10	Pcdh8	113.472	90.6678	84.4245	53.7425	52.7119	35.1601
603.899	0.537712	0.165943	-3.24034	0.00119389	0.0402929	ENSMUSG00000027774.16	Gfm1	475.162	505.405	495.207	606.738	793.406	747.477
372.663	0.713067	0.220021	-3.2409	0.00119153	0.0402929	ENSMUSG00000037315.15	Jade3	263.821	280.98	301.156	336.016	612.549	441.454
26.9134	-1.8076	0.55763	3.24158	0.00118869	0.0402929	ENSMUSG00000023926.8	Rhag	26.9495	34.1126	64.2635	6.52946	21.8118	7.81335
494.893	0.625125	0.193049	-3.23817	0.00120299	0.0404909	ENSMUSG00000044393.15	Dsg2	432.61	383.318	351.559	484.687	741.603	575.583
388.226	0.584502	0.180565	-3.23708	0.00120761	0.0405374	ENSMUSG00000046324.12	Ermp1	341.833	300.73	289.816	424.917	537.117	434.943
23.4983	-2.17344	0.671876	3.23489	0.0012169	0.0407403	ENSMUSG00000093769.4	H3c14	39.715	61.9413	15.1208	17.5793	2.72648	3.90667
316.442	0.683846	0.211759	-3.22935	0.0012407	0.0413161	ENSMUSG00000035293.13	G2e3	229.78	243.277	253.274	284.785	452.596	434.943
7148.85	0.500473	0.154953	-3.22984	0.00123861	0.0413161	ENSMUSG00000032902.1	Slc16a1	5906.19	5770.42	6086.13	7042.78	10157	7930.55
103.641	-1.25164	0.387882	3.22686	0.00125158	0.0414906	ENSMUSG00000008682.13	Rpl10	139.003	182.233	119.706	112.508	34.5354	33.8578
85.3459	1.05055	0.325588	-3.22663	0.00125257	0.0414906	ENSMUSG00000006010.14	Odr4	52.4806	61.0436	51.6628	70.3173	137.233	139.338
193.378	-0.928195	0.288423	3.21817	0.00129012	0.0426216	ENSMUSG00000020087.5	Tysnd1	265.24	232.504	267.134	208.44	103.606	83.3424
233.838	-0.859853	0.267426	3.2153	0.0013031	0.0428275	ENSMUSG00000069744.7	Psmb3	347.507	291.753	269.654	247.617	134.506	111.991
14.8967	2.77263	0.862331	-3.21528	0.00130319	0.0428275	ENSMUSG00000054266.2	Serpinb9d	1.41839	8.97701	0	14.5657	13.6324	50.7868
3627.06	-0.551795	0.17187	3.21053	0.00132491	0.0434273	ENSMUSG00000027523.20	Gnas	4367.24	4228.17	4345.97	3767.5	2365.68	2687.79
750.807	0.52622	0.163977	-3.20912	0.00133144	0.0435272	ENSMUSG00000041891.16	Lman1	588.634	628.39	627.514	759.929	1027.88	872.491
84.3457	2.60898	0.814358	-3.20372	0.00135663	0.0442353	ENSMUSG00000048120.16	Entpd1	24.1127	20.6471	26.4614	119.037	34.5354	281.281
499.214	-0.695285	0.217404	3.19812	0.00138327	0.0448704	ENSMUSG00000032199.13	Polr2m	649.624	559.267	647.675	528.384	310.819	299.512
1285.78	-0.513391	0.160507	3.19856	0.00138117	0.0448704	ENSMUSG00000025362.6	Rps26	1608.46	1382.46	1549.88	1256.17	939.727	977.971
435.586	-0.610509	0.191019	3.19606	0.00139316	0.0450745	ENSMUSG00000041126.16	H2az2	573.031	445.26	561.99	376.7	276.283	380.25
616.63	-0.543426	0.170191	3.19304	0.00140785	0.0454321	ENSMUSG00000074476.6	Spc24	757.422	678.662	762.341	589.158	479.861	432.339
249.086	0.714277	0.224121	-3.18701	0.00143752	0.046049	ENSMUSG00000032405.10	Pias1	192.902	224.425	146.168	248.119	341.719	341.183
744.628	0.594788	0.186571	-3.18799	0.00143263	0.046049	ENSMUSG00000013662.6	Atad1	615.583	514.382	648.935	685.593	1018.79	984.482
360.727	0.642187	0.201508	-3.18691	0.001438	0.046049	ENSMUSG00000030342.8	Cd9	275.168	259.435	308.717	345.559	438.963	536.517
358.384	-0.64803	0.203719	3.181	0.0014677	0.0467799	ENSMUSG00000026688.5	Mgst3	415.589	372.546	527.968	324.966	282.645	226.587
12.9578	2.46405	0.774644	-3.18088	0.00146829	0.0467799	ENSMUSG00000039116.7	Adgrg6	1.41839	7.1816	2.52014	13.5612	21.8118	31.2534
19.6627	1.98834	0.625249	-3.18009	0.00147231	0.0467888	ENSMUSG00000031709.15	Tbc1d9	8.51036	10.7724	3.7802	19.5884	24.5383	50.7868
130.065	-0.881472	0.277269	3.17912	0.00147722	0.0468261	ENSMUSG00000020392.8	Cdkn2aipnl	177.299	159.791	171.369	127.576	63.6179	80.7379
136.11	0.795365	0.250378	-3.17666	0.00148984	0.0471067	ENSMUSG00000038212.16	Mfsd14b	85.1036	116.701	94.5051	156.707	152.683	210.96
294.187	-0.696536	0.219362	3.17529	0.00149689	0.0471158	ENSMUSG00000034259.8	Exosc4	394.314	321.377	379.28	290.812	173.586	205.752
951.286	0.641707	0.202103	-3.17514	0.00149765	0.0471158	ENSMUSG00000029802.13	Abcg2	716.289	674.173	837.945	826.73	1492.29	1160.28
3270.91	0.44905	0.141512	-3.17322	0.00150759	0.0473095	ENSMUSG00000025608.9	Podxl	2744.59	2847.51	2704.11	3345.59	4290.57	3693.11
256.971	0.761272	0.240056	-3.17123	0.00151797	0.0475162	ENSMUSG00000026039.9	Sgo2a	236.872	170.563	165.069	244.604	422.604	302.116
195.006	-0.921888	0.290803	3.17014	0.00152364	0.0475747	ENSMUSG00000054716.4	Zfp771	266.658	213.653	289.816	209.445	104.515	85.9468
148.425	0.827657	0.261226	-3.16835	0.00153306	0.0476314	ENSMUSG00000019947.10	Arid5b	131.911	98.7471	90.7249	153.191	245.383	170.591
4559.78	-0.651933	0.205723	3.16898	0.00152976	0.0476314	ENSMUSG00000091405.2	H4c14	5771.45	4941.84	6010.52	5018.64	2651.05	2965.17
15.6683	2.25962	0.713545	-3.16675	0.00154153	0.0477759	ENSMUSG00000046856.13	Gpr1	8.51036	0.897701	7.56041	28.1269	16.3589	32.5556
974.268	0.515426	0.163102	-3.16016	0.00157685	0.0486127	ENSMUSG00000025665.16	Rps6ka6	736.147	833.066	834.165	951.292	1285.08	1205.86
136.896	-0.793958	0.251333	3.15899	0.00158316	0.0486127	ENSMUSG00000074886.11	Grk6	143.258	200.187	178.93	122.051	93.6092	83.3424
209.33	-0.671392	0.212576	3.15837	0.00158656	0.0486127	ENSMUSG00000030123.15	Plxnd1	259.566	267.515	244.453	178.807	127.236	178.405
164.118	-0.82801	0.262215	3.15775	0.00158992	0.0486127	ENSMUSG00000030410.16	Dmwd	202.83	225.323	204.131	164.241	82.7032	105.48
1050.95	0.444627	0.140784	-3.15821	0.00158739	0.0486127	ENSMUSG00000049382.10	Krt8	893.588	862.69	913.549	1136.63	1217.83	1281.39
112.939	0.866586	0.274462	-3.1574	0.00159182	0.0486127	ENSMUSG00000027900.15	Dram2	95.0324	61.9413	83.1645	120.042	139.05	178.405
127.723	0.847561	0.268559	-3.15596	0.00159971	0.0487347	ENSMUSG00000039087.17	Rreb1	89.3588	100.542	83.1645	133.603	219.027	140.64
215.673	-0.948291	0.300994	3.15053	0.00162972	0.0490575	ENSMUSG00000079003.3	Samd1	266.658	277.389	312.497	242.092	108.15	87.2491
817.457	-0.723092	0.229524	3.15039	0.0016305	0.0490575	ENSMUSG00000040808.4	S100g	982.947	903.087	1164.3	370.672	699.797	783.939
329.544	0.594256	0.188473	-3.153	0.00161604	0.0490575	ENSMUSG00000047866.18	Lonp2	266.658	254.049	265.874	327.98	440.781	421.921
321.09	-0.55142	0.175065	3.1498	0.00163381	0.0490575	ENSMUSG00000022774.13	Ncbp2	407.079	371.648	366.68	266.703	243.566	270.863
41.3265	1.42719	0.452889	-3.1513	0.00162545	0.0490575	ENSMUSG00000036769.14	Wdr44	21.2759	18.8517	26.4614	31.1405	59.0737	91.1557
75.4726	1.37278	0.435636	-3.15121	0.00162595	0.0490575	ENSMUSG00000056673.14	Kdm5d	15.6023	25.1356	85.6846	117.028	90.8827	118.502
410.328	0.66852	0.212523	-3.14563	0.00165728	0.0496432	ENSMUSG00000028382.15	Ptbp3	297.863	354.592	294.856	358.618	545.296	610.743
201.298	0.665748	0.211726	-3.14439	0.00166433	0.0497352	ENSMUSG00000032913.13	Lrig2	139.003	163.382	162.549	213.463	248.11	281.281
628.962	0.515406	0.163985	-3.14301	0.00167223	0.0498523	ENSMUSG00000025935.10	Tram1	492.183	548.495	510.327	639.385	821.579	761.802
291.882	0.764989	0.243513	-3.14147	0.00168101	0.0499949	ENSMUSG00000013418.8	B4galnt2	202.83	210.96	233.113	230.54	457.14	416.712
57.9702	-1.04769	0.334087	3.13598	0.00171281	0.05082	ENSMUSG00000039405.7	Prss23	70.9197	88.8724	73.0839	33.6518	31.8089	49.4845
2246.62	0.569292	0.181687	-3.13336	0.00172815	0.0510375	ENSMUSG00000005846.12	Rsl1d1	1798.52	1815.15	1810.72	1913.13	3210.88	2931.31
172.052	0.700559	0.223608	-3.13299	0.00173037	0.0510375	ENSMUSG00000005078.16	Jkamp	129.074	118.496	144.908	181.318	216.301	242.214
811.369	0.460728	0.147073	-3.13265	0.00173237	0.0510375	ENSMUSG00000044221.14	Grsf1	676.574	670.582	703.118	1018.09	896.103	903.744
309.804	0.603459	0.192758	-3.13066	0.00174413	0.0511486	ENSMUSG00000026037.14	Orc2	251.056	246.868	238.153	304.876	408.972	408.899
408.3	0.639445	0.204254	-3.13063	0.00174431	0.0511486	ENSMUSG00000029191.16	Rfc1	334.741	336.638	286.035	420.899	644.358	427.13
78.3113	1.00343	0.320917	-3.12674	0.00176753	0.0517086	ENSMUSG00000007034.15	Slc44a4	58.1542	49.3735	47.8826	73.3309	101.789	139.338
115.06	-0.85811	0.274751	3.12323	0.0017888	0.0520873	ENSMUSG00000036639.12	Nudt1	133.329	143.632	168.849	100.955	56.3473	87.2491
373.198	0.799312	0.25588	-3.12377	0.00178549	0.0520873	ENSMUSG00000073678.4	Pgap1	263.821	290.855	260.834	283.278	680.711	459.685
15.1732	-1.96245	0.628541	3.12223	0.00179489	0.0521433	ENSMUSG00000050700.11	Emilin3	28.3679	16.1586	27.7215	5.52493	5.45296	7.81335
481.348	0.805836	0.258614	-3.11598	0.00183335	0.0529013	ENSMUSG00000031410.14	Nxf7	374.456	235.198	441.024	384.234	686.164	767.01
1587.8	0.542464	0.174132	-3.11525	0.00183788	0.0529013	ENSMUSG00000026356.15	Dars	1317.69	1295.38	1262.59	1407.35	2178.46	2065.33
101.075	-0.992339	0.318429	3.11636	0.00183099	0.0529013	ENSMUSG00000003531.15	Dgcr6	136.166	113.11	156.248	95.4306	39.0795	66.4135
36.9991	-1.31058	0.420624	3.11581	0.00183439	0.0529013	ENSMUSG00000096054.3	Syne1	63.8277	46.6804	47.8826	17.077	30.9001	15.6267
226.084	0.716967	0.230269	-3.11361	0.00184813	0.0530744	ENSMUSG00000020541.12	Tom1l1	171.626	187.619	151.208	208.44	289.916	347.694
797.465	0.483914	0.155583	-3.11033	0.00186877	0.0535445	ENSMUSG00000004530.12	Coro1c	653.88	686.741	652.715	824.721	1046.06	920.673
139.035	0.700403	0.225463	-3.10651	0.00189308	0.054117	ENSMUSG00000041313.14	Slc7a1	110.635	101.44	105.846	170.268	166.315	179.707
180.256	-0.791267	0.254804	3.10539	0.00190029	0.0541995	ENSMUSG00000020477.10	Mrps24	208.504	225.323	252.014	159.721	83.6121	152.36
103.048	-0.77296	0.24938	3.09952	0.00193833	0.0551588	ENSMUSG00000029551.13	Psmg3	137.584	126.576	126.007	75.3399	77.2503	75.529
8.49271	3.29323	1.06351	-3.09658	0.00195766	0.0555825	ENSMUSG00000043099.4	Hic1	0	0.897701	3.7802	12.0544	8.17944	26.0445
275.057	0.684056	0.220987	-3.09545	0.00196512	0.0556681	ENSMUSG00000000275.16	Trim25	204.249	189.415	238.153	248.119	386.251	384.156
402.307	0.558332	0.180412	-3.09477	0.00196967	0.055671	ENSMUSG00000003731.13	Kpna6	354.599	306.116	316.277	436.469	558.928	441.454
443.309	2.38231	0.770187	-3.09316	0.0019804	0.0557688	ENSMUSG00000061082.11	Plac1	178.718	96.9517	152.468	413.867	279.919	1537.93
8206.45	-0.46048	0.148882	3.09291	0.00198204	0.0557688	ENSMUSG00000052565.7	H1f3	10185.5	8523.67	9810.89	8054.34	6230.01	6434.29
507.128	-0.769782	0.249361	3.08702	0.00202173	0.0564351	ENSMUSG00000044927.6	H1f10	695.013	576.324	651.455	573.588	269.013	277.374
26.5039	1.79621	0.581847	-3.08708	0.00202134	0.0564351	ENSMUSG00000009687.14	Fxyd5	14.1839	14.3632	6.30034	24.1088	24.5383	75.529
178.424	-0.728476	0.23599	3.0869	0.00202258	0.0564351	ENSMUSG00000061689.15	Dlgap4	249.637	228.914	191.53	169.264	112.695	118.502
263.212	-0.603709	0.195582	3.08672	0.00202375	0.0564351	ENSMUSG00000035545.13	Leng8	337.578	335.74	280.995	227.527	219.027	178.405
85.9717	-0.874933	0.283595	3.08515	0.00203447	0.0566079	ENSMUSG00000026207.16	Speg	102.124	122.087	110.886	68.8105	66.3443	45.5779
335.905	0.613226	0.19896	-3.08216	0.00205505	0.0570539	ENSMUSG00000060681.15	Slc9a6	279.424	267.515	248.233	317.934	472.59	429.734
129.35	0.801564	0.260184	-3.08076	0.00206472	0.0571954	ENSMUSG00000018500.2	Adora2b	90.7772	84.3839	107.106	124.06	192.671	177.103
2752.48	0.59126	0.192102	-3.07784	0.0020851	0.0576324	ENSMUSG00000024503.3	Spink1	2523.32	1651.77	2414.29	2550.01	3833.43	3542.05
69.1803	3.15018	1.02475	-3.07409	0.00211149	0.0582334	ENSMUSG00000055360.13	Prl2c5	2.83679	12.5678	26.4614	102.462	36.3531	234.4
710.472	-0.582277	0.18955	3.07189	0.00212706	0.0585338	ENSMUSG00000029066.12	Mrpl20	991.457	673.275	894.648	670.023	482.587	550.841
673.928	0.538091	0.175205	-3.07122	0.00213189	0.0585382	ENSMUSG00000020986.13	Sec23a	550.337	532.336	565.77	667.512	969.718	757.895
207.38	0.634042	0.206663	-3.068	0.00215497	0.0589136	ENSMUSG00000014850.15	Msh3	167.37	167.87	151.208	217.984	278.101	261.747
541.507	0.523943	0.170755	-3.06839	0.00215216	0.0589136	ENSMUSG00000006390.15	Elovl1	468.07	397.681	466.225	557.515	640.723	718.828
115.701	0.87181	0.284472	-3.06466	0.00217914	0.0594446	ENSMUSG00000025075.14	Habp2	85.1036	78.9977	80.6443	104.974	199.942	144.547
335.195	-0.652161	0.213102	3.06033	0.00221096	0.0601813	ENSMUSG00000090553.8	Snrpe	375.874	389.602	466.225	332.5	200.851	246.121
962.109	0.540736	0.176815	-3.05821	0.00222664	0.0604766	ENSMUSG00000027195.10	Hsd17b12	781.535	754.069	814.004	868.92	1319.62	1234.51
61.3833	1.0056	0.329042	-3.05616	0.00224192	0.0605092	ENSMUSG00000032051.9	Fdx1	38.2966	35.908	47.8826	72.3263	73.615	100.271
816.83	0.601816	0.196881	-3.05675	0.00223751	0.0605092	ENSMUSG00000021843.17	Ktn1	622.675	748.682	573.331	789.06	1277.81	889.42
352.161	-0.634942	0.207762	3.0561	0.00224233	0.0605092	ENSMUSG00000022568.17	Scrib	458.141	446.157	384.321	356.107	229.933	238.307
403.807	0.566387	0.185417	-3.05467	0.00225311	0.0606692	ENSMUSG00000036932.14	Aifm1	356.017	286.366	335.178	426.424	564.381	454.477
214.767	0.605464	0.198366	-3.05225	0.00227131	0.0610279	ENSMUSG00000063406.11	Tmed5	158.86	164.279	187.75	247.617	273.557	256.538
1638.27	-0.530789	0.174115	3.0485	0.00229985	0.0615307	ENSMUSG00000028763.18	Hspg2	1683.63	2374.42	1751.49	1454.06	1439.58	1126.42
143.59	-0.888174	0.291332	3.04867	0.00229858	0.0615307	ENSMUSG00000018845.14	Unc45b	174.462	226.221	161.289	133.603	109.968	55.9957
1293.76	0.555316	0.182551	-3.04198	0.00235028	0.062746	ENSMUSG00000027422.15	Rrbp1	998.549	1159.83	984.113	1352.1	1983.97	1283.99
763.928	-0.569864	0.187553	3.03842	0.00237825	0.0633575	ENSMUSG00000030319.8	Cand2	798.556	1023.38	919.849	749.381	617.093	475.312
89.2746	0.923965	0.304173	-3.03763	0.00238446	0.0633882	ENSMUSG00000026675.12	Hsd17b7	68.0829	46.6804	70.5638	89.4034	146.321	114.596
42.2513	-1.24732	0.41087	3.03581	0.00239892	0.0636375	ENSMUSG00000039376.13	Synpo2l	52.4806	61.9413	65.5235	37.67	16.3589	19.5334
15379.8	-1.47926	0.487702	3.03312	0.00242037	0.0640706	ENSMUSG00000055609.8	Hba-x	19437.7	22650.8	25830.1	6556.58	13313.4	4490.07
1766	0.519884	0.171642	-3.02888	0.00245465	0.0645014	ENSMUSG00000010760.5	Phlda2	1656.68	1137.39	1562.48	2236.09	1801.29	2202.06
1662.1	0.475073	0.156825	-3.02933	0.00245098	0.0645014	ENSMUSG00000030058.17	Copg1	1385.77	1377.07	1408.76	1640.9	2296.61	1863.48
149.078	0.901845	0.297905	-3.02729	0.00246755	0.0645014	ENSMUSG00000035762.11	Tmem161b	86.522	95.1563	128.527	113.512	218.118	252.632
199.964	-0.862458	0.284613	3.03028	0.00244326	0.0645014	ENSMUSG00000073616.10	Cops9	275.168	194.801	306.196	193.372	81.7944	148.454
196.66	0.658648	0.217514	-3.02808	0.00246117	0.0645014	ENSMUSG00000021196.14	Pfkp	143.258	163.382	148.688	207.938	226.298	290.396
52.1332	-1.11647	0.368773	3.02752	0.00246566	0.0645014	ENSMUSG00000006235.6	Epor	93.614	65.5321	56.703	41.1858	33.6266	22.1378
197.898	-0.649201	0.214519	3.02632	0.00247551	0.0645635	ENSMUSG00000036114.3	Rpp25l	236.872	254.049	235.633	183.327	129.053	148.454
418.034	0.67825	0.22416	-3.02574	0.00248024	0.0645635	ENSMUSG00000037416.13	Dmxl1	350.343	308.809	303.676	336.016	611.64	597.721
43.8635	-1.20455	0.398339	3.02392	0.00249523	0.064819	ENSMUSG00000078794.4	Dact3	62.4093	57.4528	65.5235	39.1768	19.0854	19.5334
127.252	-0.834068	0.276009	3.02189	0.00251205	0.0649864	ENSMUSG00000014498.9	Ankrd52	154.605	168.768	168.849	125.567	84.5209	61.2046
211.213	0.827557	0.273827	-3.02219	0.00250952	0.0649864	ENSMUSG00000049164.7	Zfp518a	158.86	122.087	175.149	161.227	342.628	307.325
42.6908	-1.38376	0.458015	3.0212	0.00251772	0.0649987	ENSMUSG00000043496.7	Tril	52.4806	71.816	63.0034	42.1904	13.6324	13.0222
373.466	-0.742045	0.24583	3.01852	0.0025401	0.0650805	ENSMUSG00000059070.16	Rpl18	513.459	438.976	453.624	406.333	183.583	244.818
1387.46	0.433521	0.143595	-3.01906	0.00253561	0.0650805	ENSMUSG00000004880.11	Lbr	1182.94	1138.28	1222.27	1610.77	1745.86	1424.63
228.192	0.634825	0.210323	-3.01833	0.00254168	0.0650805	ENSMUSG00000024145.6	Pigf	188.646	172.359	173.889	224.513	288.098	321.65
922.345	0.594781	0.196961	-3.01979	0.0025295	0.0650805	ENSMUSG00000016534.15	Lamp2	695.013	693.025	814.004	776.503	1244.18	1311.34
155.913	0.742192	0.246015	-3.01685	0.00255414	0.0652661	ENSMUSG00000019838.11	Slc16a10	116.308	96.054	138.607	175.291	239.93	169.289
41.7894	1.54303	0.512043	-3.01347	0.00258281	0.0653108	ENSMUSG00000023927.15	Satb1	12.7655	29.6241	20.1611	39.1768	31.8089	117.2
27.1604	1.94398	0.64518	-3.01309	0.00258604	0.0653108	ENSMUSG00000024738.6	Pga5	11.3472	8.07931	13.8607	12.5567	27.2648	89.8535
299.937	0.686056	0.227566	-3.01476	0.00257187	0.0653108	ENSMUSG00000030629.15	Zfand6	246.801	201.983	239.413	274.74	344.445	492.241
1235.48	-0.546022	0.181225	3.01295	0.00258719	0.0653108	ENSMUSG00000021546.18	Hnrnpk	1641.08	1435.42	1328.11	1266.21	933.365	808.682
53.3408	-1.3495	0.447694	3.01433	0.00257548	0.0653108	ENSMUSG00000071192.6	Wfikkn1	83.6852	64.6344	84.4245	52.7379	25.4471	9.11557
7.74861	-2.7998	0.928723	3.01468	0.00257255	0.0653108	ENSMUSG00000040690.15	Col16a1	8.51036	19.7494	12.6007	2.51133	1.81765	1.30222
525.103	0.708988	0.235468	-3.01097	0.00260416	0.0656069	ENSMUSG00000037335.13	Hand1	449.631	354.592	390.621	598.199	431.693	925.882
174.071	-0.961453	0.319735	3.00703	0.00263811	0.0663288	ENSMUSG00000026930.15	Gpsm1	221.269	241.481	230.592	198.395	65.4355	87.2491
168.037	0.657845	0.218928	-3.00484	0.00265716	0.0664265	ENSMUSG00000032059.13	Alg9	141.839	114.906	136.087	215.472	216.301	183.614
2086.08	-0.514214	0.171165	3.0042	0.00266276	0.0664265	ENSMUSG00000063021.3	H2ac15	2582.9	2207.45	2576.84	2155.73	1516.83	1476.72
716.061	-0.48125	0.160195	3.00415	0.00266321	0.0664265	ENSMUSG00000040048.14	Ndufb10	853.873	727.137	923.63	626.326	550.749	614.65
319.435	0.76271	0.253799	-3.00518	0.00265423	0.0664265	ENSMUSG00000029311.16	Hsd17b11	258.148	181.336	270.915	251.635	505.308	449.268
118.174	0.867178	0.288838	-3.0023	0.00267947	0.0666991	ENSMUSG00000027956.11	Tmem144	95.0324	77.2023	78.1242	99.4487	189.945	169.289
121.004	0.829275	0.276674	-2.9973	0.00272379	0.0676677	ENSMUSG00000051730.15	Mettl5	89.3588	88.8724	81.9044	105.476	187.218	173.196
387.235	0.643932	0.214916	-2.99621	0.00273361	0.0677772	ENSMUSG00000038774.9	Ascc3	296.444	316.888	291.076	329.487	581.649	507.868
184.981	0.676754	0.225919	-2.99556	0.00273938	0.0677862	ENSMUSG00000074794.10	Arrdc3	131.911	125.678	168.849	189.857	243.566	250.027
488.286	0.488866	0.163364	-2.99249	0.0027671	0.068337	ENSMUSG00000024002.18	Brd4	404.242	436.282	376.76	526.877	603.461	582.095
1441.45	0.440979	0.147635	-2.98695	0.00281773	0.0687062	ENSMUSG00000022462.7	Slc38a2	1241.09	1278.33	1147.92	1503.28	1877.64	1600.43
1260.43	0.519718	0.174039	-2.98621	0.00282461	0.0687062	ENSMUSG00000024091.9	Vapa	1076.56	910.268	1118.94	1208.95	1446.85	1800.98
121.459	0.845602	0.282989	-2.98811	0.00280709	0.0687062	ENSMUSG00000051674.15	Dcun1d4	73.7565	87.9747	97.0252	104.471	175.404	190.125
704.962	0.590059	0.197604	-2.98606	0.00282595	0.0687062	ENSMUSG00000009575.14	Cbx5	581.542	501.815	606.093	729.29	1116.95	694.086
238.103	0.57108	0.191095	-2.98846	0.00280384	0.0687062	ENSMUSG00000005374.13	Tbl2	182.973	185.824	205.391	275.242	274.466	304.721
88.3236	0.828546	0.277246	-2.98849	0.00280358	0.0687062	ENSMUSG00000030760.14	Acer3	55.3174	69.1229	65.5235	99.4487	127.236	113.294
37.5645	1.73065	0.579158	-2.98821	0.00280615	0.0687062	ENSMUSG00000028591.11	Pramef12	35.4599	10.7724	6.30034	34.6564	32.7178	105.48
349.005	0.61916	0.207293	-2.98689	0.00281832	0.0687062	ENSMUSG00000021114.9	Atp6v1d	269.495	288.162	265.874	312.41	506.216	451.872
524.318	-0.572421	0.191763	2.98504	0.00283539	0.0687971	ENSMUSG00000031799.10	Tpm4	669.482	598.766	613.653	485.691	310.819	467.499
145.618	0.731332	0.245046	-2.98447	0.00284068	0.0687971	ENSMUSG00000027660.16	Skil	109.216	99.6448	118.446	143.648	182.674	220.076
2185.92	-0.412479	0.138242	2.98375	0.00284737	0.0688261	ENSMUSG00000056201.8	Cfl1	2489.28	2443.54	2557.94	2060.3	1684.06	1880.41
31.2216	-3.3055	1.10806	2.98314	0.00285308	0.0688313	ENSMUSG00000063129.1	Aldoart2	70.9197	54.7597	45.3624	13.5612	2.72648	0
831.289	0.473882	0.158955	-2.98123	0.00287097	0.068997	ENSMUSG00000025007.13	Aldh18a1	651.043	693.923	742.18	871.934	1110.59	918.069
111.365	-0.984926	0.330321	2.98172	0.00286635	0.068997	ENSMUSG00000067722.4	BC003965	194.32	123.883	128.527	113.512	45.4413	62.5068
1366.79	0.413742	0.138943	-2.97778	0.00290341	0.069384	ENSMUSG00000022464.14	Slc38a4	1153.15	1181.37	1183.2	1701.18	1468.66	1513.19
2410.57	0.413257	0.138781	-2.97775	0.0029037	0.069384	ENSMUSG00000031353.13	Rbbp7	2100.64	1984.82	2116.91	2472.66	3035.48	2752.9
450.175	-0.548851	0.18427	2.97853	0.00289639	0.069384	ENSMUSG00000050608.11	Micos10	621.257	449.748	536.789	413.867	340.81	338.578
1985.99	0.526097	0.176801	-2.97565	0.00292371	0.069675	ENSMUSG00000018593.13	Sparc	1595.69	1488.39	1796.86	1908.11	2153.92	2972.98
2596.68	-0.557547	0.187392	2.9753	0.002927	0.069675	ENSMUSG00000024608.11	Rps14	3462.3	2637.44	3182.93	2745.39	1842.19	1709.82
48.7811	1.0807	0.363908	-2.96971	0.00298084	0.070785	ENSMUSG00000035878.13	Hykk	26.9495	30.5218	36.542	61.2765	82.7032	54.6934
645.516	0.458744	0.154496	-2.96928	0.00298495	0.070785	ENSMUSG00000020570.15	Sypl	553.174	517.973	559.47	679.064	792.497	770.917
21.7404	1.76732	0.595857	-2.96601	0.00301694	0.0714084	ENSMUSG00000039200.16	Atf7ip2	17.0207	5.3862	7.56041	20.0906	30.9001	49.4845
369.407	0.565661	0.190768	-2.96518	0.00302509	0.0714664	ENSMUSG00000055943.5	Emc7	336.159	254.947	302.416	374.691	450.778	497.45
674.579	-0.448495	0.151421	2.96191	0.00305737	0.0720928	ENSMUSG00000071415.6	Rpl23	846.781	762.148	728.319	589.158	568.926	552.143
19.8238	2.0073	0.678058	-2.96036	0.00307279	0.0723203	ENSMUSG00000023284.15	Zfp605	0	12.5678	10.0805	16.5748	35.4442	44.2756
329.075	0.568556	0.192096	-2.95974	0.00307894	0.0723292	ENSMUSG00000066150.12	Slc31a1	283.679	260.333	250.753	334.509	466.228	378.947
97.3638	-0.956702	0.323628	2.95618	0.00311476	0.0730336	ENSMUSG00000051817.8	Sox12	102.124	146.325	138.607	95.9328	39.9884	61.2046
162.207	-0.67033	0.227029	2.95261	0.00315098	0.0732086	ENSMUSG00000040152.8	Thbs1	181.554	225.323	191.53	131.091	140.868	102.876
167.65	0.672442	0.2277	-2.95319	0.00314511	0.0732086	ENSMUSG00000031360.14	Ctps2	147.513	115.803	124.747	175.793	236.295	205.752
89.9785	-0.839625	0.284362	2.95266	0.00315046	0.0732086	ENSMUSG00000054667.7	Irs4	100.706	131.064	114.666	75.3399	49.0766	69.0179
22.1276	-1.55987	0.528311	2.95256	0.00315146	0.0732086	ENSMUSG00000032532.7	Cck	31.2047	39.4988	27.7215	11.0499	6.36179	16.9289
7.21718	4.00672	1.35611	-2.95457	0.00313106	0.0732086	ENSMUSG00000073243.2	Gm9	2.83679	0	0	3.51586	10.9059	26.0445
219.282	-0.661728	0.224248	2.95087	0.00316877	0.0734745	ENSMUSG00000003680.16	Taf6l	292.189	222.63	294.856	200.906	173.586	131.525
15.6861	-1.79066	0.607093	2.94956	0.0031823	0.0736517	ENSMUSG00000032368.14	Zic1	22.6943	21.5448	28.9816	8.53852	4.54413	7.81335
186.684	-0.840487	0.285225	2.94675	0.00321131	0.074186	ENSMUSG00000060639.5	H4c9	269.495	227.118	225.552	204.422	85.4297	108.085
161.158	-0.788429	0.267625	2.94602	0.00321889	0.0742242	ENSMUSG00000054312.6	Mrps21	228.361	199.29	187.75	166.752	84.5209	100.271
381.227	0.7483	0.254273	-2.9429	0.00325151	0.0748385	ENSMUSG00000031229.16	Atrx	221.269	348.308	280.995	298.346	637.088	501.357
97.1129	-0.904285	0.307671	2.93913	0.00329135	0.0752026	ENSMUSG00000030979.13	Uros	106.38	126.576	147.428	60.7742	97.2445	44.2756
276.507	-0.745023	0.253471	2.93928	0.00328973	0.0752026	ENSMUSG00000032394.6	Igdcc3	363.109	334.842	345.259	306.885	152.683	156.267
141.584	-0.675379	0.22972	2.94001	0.00328203	0.0752026	ENSMUSG00000042570.14	Mier2	150.35	184.029	187.75	115.019	99.0621	113.294
696.207	0.453267	0.154146	-2.9405	0.00327685	0.0752026	ENSMUSG00000030894.5	Tpp1	646.788	584.403	531.749	766.96	815.218	832.122
1303.86	0.543016	0.184818	-2.93811	0.00330216	0.0753121	ENSMUSG00000042354.7	Gnl3	1107.77	1017.99	1055.94	1107.5	1778.57	1755.4
151.896	0.716673	0.244127	-2.93566	0.00332838	0.0756802	ENSMUSG00000028572.13	Hook1	103.543	132.86	105.846	151.684	190.854	226.587
111.806	-0.791494	0.269657	2.93519	0.00333348	0.0756802	ENSMUSG00000049577.15	Zfpm1	139.003	146.325	142.388	106.48	75.4326	61.2046
683.607	0.576932	0.196576	-2.93491	0.00333643	0.0756802	ENSMUSG00000037720.16	Tmem33	619.838	492.838	531.749	613.267	824.306	1019.64
1422.3	0.560491	0.19121	-2.93129	0.00337558	0.0764298	ENSMUSG00000001833.17	Septin7	1177.27	1165.22	1102.56	1176.31	1854.92	2057.52
641.045	-0.612715	0.209159	2.92943	0.00339584	0.0767497	ENSMUSG00000014294.4	Ndufa2	790.045	622.107	916.069	628.837	373.528	515.681
340.321	0.575462	0.196508	-2.92844	0.00340669	0.0768561	ENSMUSG00000024456.16	Diaph1	255.311	313.298	250.753	395.283	483.496	343.787
344.023	0.625613	0.214002	-2.9234	0.00346227	0.0779695	ENSMUSG00000003585.13	Sec14l2	313.465	238.788	259.574	320.446	521.667	410.201
2249.75	-0.596238	0.20409	2.92145	0.00348405	0.0781788	ENSMUSG00000069273.2	H3c6	2923.31	2694.9	2511.31	2525.9	1413.23	1429.84
99.7487	-0.883376	0.302362	2.92158	0.0034826	0.0781788	ENSMUSG00000030551.14	Nr2f2	153.187	145.427	88.2047	67.8059	52.7119	91.1557
18.3353	-1.67742	0.574409	2.92025	0.00349749	0.0783399	ENSMUSG00000072720.9	Myo18b	24.1127	28.7264	31.5017	9.04079	12.7236	3.90667
782.471	-0.535832	0.183778	2.91565	0.00354951	0.0793633	ENSMUSG00000042541.10	Sem1	1072.31	829.475	878.267	725.775	496.219	692.784
25.3374	-1.38785	0.476579	2.9121	0.00359004	0.0801264	ENSMUSG00000003352.14	Cacnb3	38.2966	36.8057	34.0218	11.5521	11.8147	19.5334
472.625	-0.555424	0.190771	2.91147	0.00359733	0.0801462	ENSMUSG00000024007.15	Ppil1	575.868	500.917	612.393	444.003	296.278	406.294
605.591	0.567314	0.194988	-2.90948	0.00362027	0.080514	ENSMUSG00000040044.11	Orc3	493.601	480.27	487.646	519.845	807.038	845.144
122.328	0.72168	0.248126	-2.90852	0.0036314	0.0805676	ENSMUSG00000049929.7	Lpar4	99.2876	86.1793	93.245	177.802	147.23	130.222
15.6047	-1.75705	0.604179	2.90817	0.00363555	0.0805676	ENSMUSG00000090019.5	Gimap1	25.5311	26.931	20.1611	9.04079	5.45296	6.51112
14.2649	-1.9238	0.661751	2.90713	0.0036476	0.0806918	ENSMUSG00000037907.16	Ankrd13b	19.8575	33.2149	15.1208	8.03626	5.45296	3.90667
52.5364	1.01593	0.349591	-2.90606	0.00366009	0.0808253	ENSMUSG00000026579.8	F5	39.715	25.1356	40.3222	67.8059	74.5238	67.7157
195.203	0.667424	0.229783	-2.90458	0.00367743	0.0808523	ENSMUSG00000043019.12	Edem3	160.279	154.405	136.087	180.816	263.56	276.072
92.8108	-0.788608	0.271554	2.90406	0.00368357	0.0808523	ENSMUSG00000031832.15	Taf1c	106.38	108.622	138.607	76.3445	61.8002	65.1112
65.5622	-1.03251	0.355577	2.90376	0.00368714	0.0808523	ENSMUSG00000062432.4	Cyp26c1	60.9909	125.678	78.1242	55.2493	38.1707	35.1601
285.094	0.746849	0.257091	-2.90499	0.0036726	0.0808523	ENSMUSG00000025194.5	Abcc2	229.78	196.596	211.691	223.006	504.399	345.09
87.231	-0.847745	0.292173	2.90151	0.00371363	0.0812909	ENSMUSG00000050248.11	Evc2	110.635	127.473	99.5453	79.3581	49.0766	57.2979
349.259	-0.722543	0.249341	2.89781	0.00375782	0.0821147	ENSMUSG00000020695.14	Mrc2	424.1	492.838	391.881	379.211	240.839	166.685
350.35	-0.697135	0.240761	2.89554	0.00378503	0.0825652	ENSMUSG00000020808.3	Pimreg	462.396	401.272	441.024	389.256	206.304	201.845
678.667	-0.548296	0.189426	2.89451	0.00379747	0.0826925	ENSMUSG00000031848.15	Lsm4	914.864	675.969	831.645	679.064	462.593	507.868
261.033	-0.563808	0.194885	2.89303	0.00381548	0.0829404	ENSMUSG00000063689.4	H2ac21	358.854	293.548	283.515	230.038	194.489	205.752
138.371	0.824196	0.285094	-2.89097	0.0038406	0.0833417	ENSMUSG00000025885.18	Myo5b	113.472	88.8724	97.0252	115.521	240.839	174.498
94.9332	-0.866214	0.30005	2.8869	0.00389064	0.0841359	ENSMUSG00000003573.15	Homer3	123.4	131.962	112.146	77.8513	40.8972	83.3424
284.054	0.53608	0.185694	-2.8869	0.00389054	0.0841359	ENSMUSG00000021468.8	Sptlc1	225.525	218.141	252.014	312.41	368.075	328.161
115.605	-0.833239	0.289092	2.88227	0.00394827	0.085235	ENSMUSG00000002058.13	Unc119	171.626	164.279	109.626	106.983	59.0737	82.0402
8.07929	-2.95943	1.02777	2.87948	0.00398332	0.0858436	ENSMUSG00000092074.2	Dynlt1a	19.8575	8.97701	15.1208	4.5204	0	0
465.388	-0.613047	0.213035	2.87769	0.00400602	0.0858893	ENSMUSG00000032171.7	Pin1	626.93	523.359	543.089	484.185	351.716	263.049
61.8362	0.936596	0.325451	-2.87784	0.00400408	0.0858893	ENSMUSG00000020521.7	Rnft1	43.9702	35.0103	49.1426	79.3581	94.518	69.0179
220.321	0.659038	0.228955	-2.87846	0.00399626	0.0858893	ENSMUSG00000050029.7	Rap2c	195.738	150.814	165.069	203.92	280.827	325.556
76.2497	0.941746	0.327406	-2.87638	0.00402262	0.086007	ENSMUSG00000027978.9	Prss12	63.8277	41.2942	51.6628	69.815	125.418	105.48
712.961	-0.514331	0.178824	2.87618	0.00402524	0.086007	ENSMUSG00000022742.6	Cpox	848.2	760.352	911.029	621.303	679.802	457.081
178.962	-0.678635	0.2364	2.87071	0.00409555	0.0872277	ENSMUSG00000032035.16	Ets1	207.086	224.425	231.852	157.209	158.136	95.0624
69.8152	-1.08216	0.376974	2.87065	0.00409631	0.0872277	ENSMUSG00000060708.4	Bloc1s4	107.798	85.2816	94.5051	73.3309	34.5354	23.44
130.176	-0.971434	0.338707	2.86807	0.00412987	0.0877931	ENSMUSG00000049295.17	Zfp219	154.605	198.392	167.589	148.671	63.6179	48.1823
1171.48	-0.615342	0.214669	2.86647	0.0041508	0.0879394	ENSMUSG00000064368.1	mt-Nd6	1321.94	1351.04	1577.6	942.754	597.099	1238.42
122.965	0.82686	0.28841	-2.86696	0.00414432	0.0879394	ENSMUSG00000047146.17	Tet1	70.9197	110.417	81.9044	108.992	166.315	199.24
222.449	0.56238	0.196343	-2.86427	0.00417972	0.0884026	ENSMUSG00000038816.14	Ctnnal1	178.718	164.279	196.571	258.667	279.919	256.538
528.436	0.573537	0.200857	-2.85545	0.00429756	0.0898582	ENSMUSG00000043207.10	Zmpste24	398.569	381.523	495.207	572.081	808.856	514.379
5998.44	-0.502397	0.175822	2.85742	0.00427094	0.0898582	ENSMUSG00000036181.2	H1f2	7960.03	6072.94	7070.24	6282.35	4461.43	4143.68
52.6897	1.08301	0.379082	-2.85694	0.00427741	0.0898582	ENSMUSG00000026707.15	Nsun6	26.9495	41.2942	31.5017	47.7153	73.615	95.0624
93.2385	-0.9788	0.34242	2.85847	0.00425685	0.0898582	ENSMUSG00000031543.18	Ank1	112.053	131.064	128.527	51.2311	102.697	33.8578
113.657	-2.86175	1.00224	2.85536	0.00429878	0.0898582	ENSMUSG00000037563.15	Rps16	259.566	194.801	146.168	65.2946	10.9059	5.2089
297.223	0.54939	0.192261	-2.85752	0.00426964	0.0898582	ENSMUSG00000049439.13	Cyp20a1	251.056	260.333	210.431	309.898	354.442	397.179
482.919	0.522448	0.182943	-2.8558	0.00429282	0.0898582	ENSMUSG00000021814.17	Anxa7	446.794	373.443	367.94	465.601	613.458	630.277
7.82274	2.80008	0.980824	-2.85483	0.00430604	0.0898598	ENSMUSG00000041193.15	Pla2g5	1.41839	0.897701	3.7802	14.0635	16.3589	10.4178
57.2228	-1.02271	0.358577	2.85214	0.00434266	0.090323	ENSMUSG00000001802.16	Lrp3	65.2461	65.5321	99.5453	44.1994	24.5383	44.2756
226.603	0.868139	0.304333	-2.85259	0.00433642	0.090323	ENSMUSG00000087166.9	L1td1	161.697	172.359	146.168	158.716	468.046	252.632
1259.91	0.478675	0.167925	-2.85053	0.00436463	0.0905863	ENSMUSG00000027984.8	Hadh	1146.06	927.325	1084.92	1203.43	1704.05	1493.65
93.5948	-0.855085	0.300014	2.85016	0.00436979	0.0905863	ENSMUSG00000047371.7	Zfp768	127.655	110.417	126.007	92.417	49.0766	55.9957
46.481	1.56311	0.548896	-2.84774	0.00440308	0.0908252	ENSMUSG00000047751.9	Utf1	49.6438	8.97701	12.6007	39.1768	49.9855	118.502
771.022	0.415735	0.145983	-2.84784	0.00440171	0.0908252	ENSMUSG00000032349.13	Elovl5	696.431	670.582	614.913	872.436	879.744	892.024
9.2764	-2.36899	0.831578	2.84879	0.00438861	0.0908252	ENSMUSG00000054708.17	Ankrd24	8.51036	20.6471	17.6409	3.0136	4.54413	1.30222
23.5371	-1.47734	0.519237	2.84522	0.00443805	0.0910965	ENSMUSG00000032596.14	Uba7	24.1127	34.1126	45.3624	9.04079	18.1765	10.4178
397.805	-0.516305	0.181413	2.84602	0.00442692	0.0910965	ENSMUSG00000031388.14	Naa10	480.836	431.794	495.207	384.234	292.642	302.116
68.956	-0.995709	0.349927	2.84548	0.00443448	0.0910965	ENSMUSG00000063605.5	Ccdc102a	93.614	76.3046	108.366	66.2991	41.806	27.3467
93.5077	-0.923051	0.324634	2.84336	0.00446409	0.091481	ENSMUSG00000031273.16	Col4a6	120.563	150.814	98.2853	90.9102	62.709	37.7645
48.4018	1.11434	0.392007	-2.84266	0.00447388	0.0915317	ENSMUSG00000047878.13	A4galt	32.6231	22.4425	36.542	53.2402	51.8031	93.7602
383.441	-0.572238	0.201643	2.83787	0.00454153	0.0927643	ENSMUSG00000019987.9	Arg1	456.723	447.953	475.046	390.763	294.46	235.703
172.832	-0.733454	0.25866	2.8356	0.00457402	0.0931242	ENSMUSG00000024571.15	Gm16286	209.922	220.834	219.252	179.811	89.9738	117.2
1401	0.473201	0.16687	-2.83575	0.00457176	0.0931242	ENSMUSG00000021109.13	Hif1a	1100.67	1135.59	1281.49	1302.88	1879.45	1705.91
34.5199	1.2233	0.432037	-2.83146	0.00463353	0.0932942	ENSMUSG00000074272.10	Ceacam1	21.2759	17.954	22.6812	33.6518	58.1649	53.3912
751.01	0.55059	0.194377	-2.83259	0.00461724	0.0932942	ENSMUSG00000019943.10	Atp2b1	565.939	705.593	554.43	715.729	1138.76	825.611
153.026	-0.647731	0.229016	2.82832	0.00467924	0.0932942	ENSMUSG00000027533.10	Fabp5	154.605	208.267	196.571	122.553	107.242	128.92
44.5617	-1.10904	0.391546	2.83246	0.0046191	0.0932942	ENSMUSG00000116165.1	Pdxp	53.899	63.7367	66.7836	40.1813	24.5383	18.2311
180.92	-0.718727	0.253965	2.83003	0.00465439	0.0932942	ENSMUSG00000003199.16	Mpnd	215.596	239.686	223.032	191.363	109.059	106.782
645.955	0.688537	0.243169	-2.83151	0.00463281	0.0932942	ENSMUSG00000033577.18	Myo6	553.174	445.26	485.126	490.212	1150.57	751.384
17.6591	-1.92673	0.680638	2.83077	0.00464354	0.0932942	ENSMUSG00000046711.16	Hmga1	29.7863	17.954	37.802	14.5657	4.54413	1.30222
29.3155	1.30309	0.460662	-2.82874	0.00467321	0.0932942	ENSMUSG00000078452.10	Raet1d	11.3472	23.3402	15.1208	37.67	45.4413	42.9734
316.526	-0.766508	0.270999	2.82845	0.00467735	0.0932942	ENSMUSG00000034220.7	Gpc1	381.548	394.988	423.383	368.663	150.865	179.707
18.4192	-1.55318	0.54913	2.82844	0.00467755	0.0932942	ENSMUSG00000030035.14	Wbp1	31.2047	26.931	23.9413	8.53852	8.17944	11.72
43.5854	-1.07141	0.378165	2.83319	0.00460857	0.0932942	ENSMUSG00000027168.21	Pax6	52.4806	62.839	63.0034	33.1496	31.8089	18.2311
97.9723	0.924131	0.326459	-2.83077	0.00464356	0.0932942	ENSMUSG00000023960.13	Enpp5	73.7565	56.5551	71.8239	72.3263	154.501	158.871
158.441	-0.631442	0.222961	2.83207	0.00462473	0.0932942	ENSMUSG00000018659.12	Pnpo	182.973	191.21	204.131	121.046	144.503	106.782
32.4292	1.41095	0.499065	-2.82719	0.00469588	0.0934772	ENSMUSG00000039126.10	Prune2	14.1839	17.954	20.1611	30.6382	30.9001	80.7379
1913.27	-0.377231	0.133558	2.82447	0.00473591	0.0941243	ENSMUSG00000035783.9	Acta2	2127.59	2111.39	2247.96	1754.92	1551.37	1686.38
247.612	-2.99681	1.0615	2.82319	0.00475483	0.0943505	ENSMUSG00000062070.12	Pgk1	519.132	494.633	307.457	136.616	10.9059	16.9289
63.113	-0.879316	0.311826	2.8199	0.0048039	0.0950638	ENSMUSG00000024049.15	Myom1	83.6852	86.1793	74.344	40.1813	40.8972	53.3912
349.419	-0.560399	0.19874	2.81976	0.00480596	0.0950638	ENSMUSG00000113902.1	Ndufb1-ps	462.396	358.183	432.203	341.541	241.748	260.445
25.4	2.01273	0.714133	-2.81843	0.00482591	0.0953038	ENSMUSG00000000730.13	Dnmt3l	25.5311	1.7954	3.7802	15.068	55.4384	50.7868
16.7311	-2.23422	0.792856	2.81794	0.00483331	0.0953038	ENSMUSG00000074781.5	Ube2n	12.7655	44.885	26.4614	14.0635	0.908827	1.30222
701.533	0.437731	0.155608	-2.81303	0.0049077	0.0961648	ENSMUSG00000038235.4	F11r	672.319	565.551	551.91	832.255	818.853	768.313
9.29633	3.22592	1.14638	-2.81401	0.00489277	0.0961648	ENSMUSG00000038327.8	Serpinb9f	0	3.5908	1.26007	6.52946	2.72648	41.6712
2008.06	-0.423977	0.150674	2.81387	0.00489488	0.0961648	ENSMUSG00000069266.5	H4c2	2294.96	2302.6	2308.44	2007.56	1482.3	1652.52
11.2011	-2.14448	0.762248	2.81336	0.00490265	0.0961648	ENSMUSG00000039830.9	Olig2	25.5311	12.5678	17.6409	6.52946	3.63531	1.30222
45.801	1.41578	0.503488	-2.81194	0.0049243	0.096189	ENSMUSG00000035356.17	Nfkbiz	21.2759	17.954	35.2819	50.2266	26.356	123.711
291.498	0.597763	0.212568	-2.81211	0.00492181	0.096189	ENSMUSG00000022711.16	Pmm2	226.943	204.676	263.354	269.215	407.154	377.645
301.711	0.62963	0.224147	-2.80901	0.00496941	0.096919	ENSMUSG00000055723.6	Rras2	236.872	220.834	250.753	270.721	345.354	485.73
203.771	-0.613212	0.218356	2.80831	0.00498017	0.0969778	ENSMUSG00000039483.10	Asb6	266.658	228.914	246.973	196.386	150.865	132.827
1612.5	0.423491	0.150916	-2.80614	0.00501392	0.0974833	ENSMUSG00000032437.10	Stt3b	1392.86	1377.07	1362.13	1647.94	2163.01	1731.96
17.0116	-1.66771	0.594717	2.80421	0.00504405	0.0976145	ENSMUSG00000021256.5	Vash1	17.0207	29.6241	31.5017	11.0499	6.36179	6.51112
54.1224	2.98996	1.06589	-2.80514	0.00502947	0.0976145	ENSMUSG00000020429.7	Igfbp1	7.09197	8.97701	20.1611	12.5567	84.5209	191.427
985.636	-0.522102	0.186173	2.80439	0.00504114	0.0976145	ENSMUSG00000037016.11	Frem2	1080.82	1341.16	1066.02	862.893	956.086	606.837
26.2948	1.40668	0.502382	-2.80001	0.00511009	0.0986426	ENSMUSG00000051811.14	Cox6b2	19.8575	14.3632	8.82047	32.6473	29.9913	52.089
37.6699	-1.32902	0.47468	2.79983	0.00511293	0.0986426	ENSMUSG00000028909.17	Ptpru	68.0829	46.6804	49.1426	37.67	12.7236	11.72
646.468	0.500632	0.179053	-2.79599	0.00517404	0.0990583	ENSMUSG00000032096.16	Arcn1	582.96	523.359	498.987	613.267	899.738	760.499
896.199	0.518975	0.185488	-2.79789	0.00514372	0.0990583	ENSMUSG00000022247.12	Brix1	770.188	709.183	728.319	772.485	1165.12	1231.9
369.69	-0.561504	0.200752	2.797	0.00515798	0.0990583	ENSMUSG00000026837.16	Col5a1	448.213	466.804	410.782	367.659	298.095	226.587
3234.23	-0.599161	0.214272	2.79626	0.00516977	0.0990583	ENSMUSG00000027239.14	Mdk	4106.25	3786.5	3801.62	3774.03	1966.7	1970.27
500.912	0.709079	0.253578	-2.79629	0.00516928	0.0990583	ENSMUSG00000022360.8	Atad2	236.872	455.134	446.064	442.496	820.671	604.232
9.66438	2.55747	0.915608	-2.7932	0.00521898	0.0997661	ENSMUSG00000036995.7	Asap3	2.83679	1.7954	3.7802	11.0499	7.27061	31.2534
83.2873	-0.944014	0.338318	2.79031	0.00526571	0.100506	ENSMUSG00000074576.4	Mocs3	119.145	94.2586	118.446	87.3943	42.7149	37.7645
213.494	-0.797691	0.286135	2.78781	0.00530654	0.101131	ENSMUSG00000067847.13	Romo1	292.189	279.185	245.713	246.613	111.786	105.48
16.7823	2.1636	0.777638	-2.78227	0.00539801	0.102718	ENSMUSG00000021255.17	Esrrb	12.7655	0	6.30034	12.0544	31.8089	37.7645
798.289	0.531043	0.190967	-2.78081	0.00542235	0.103025	ENSMUSG00000020124.10	Usp15	643.951	659.81	652.715	677.557	1126.95	1028.76
151.026	-0.66412	0.23896	2.77921	0.00544907	0.103376	ENSMUSG00000003308.15	Keap1	205.667	169.665	182.71	129.082	131.78	87.2491
266.117	-3.36293	1.21071	2.77765	0.00547527	0.103559	ENSMUSG00000011752.7	Pgam1	594.307	508.996	352.819	123.557	11.8147	5.2089
658.404	0.473858	0.170595	-2.77768	0.00547483	0.103559	ENSMUSG00000028869.13	Gnl2	553.174	575.426	524.188	670.525	916.097	711.015
1738.37	-0.527428	0.189916	2.77716	0.00548365	0.103561	ENSMUSG00000040856.17	Dlk1	2087.88	1956.09	2119.43	1908.61	1257.82	1100.38
2238.86	-0.381061	0.137331	2.77477	0.00552412	0.104168	ENSMUSG00000028034.15	Fubp1	2517.65	2587.17	2496.19	2057.28	2049.4	1725.45
383.012	-0.519778	0.187402	2.7736	0.00554394	0.104385	ENSMUSG00000038880.13	Mrps34	497.856	423.715	435.983	375.193	294.46	270.863
168.792	0.615286	0.222236	-2.76862	0.00562951	0.105836	ENSMUSG00000041650.15	Pcca	136.166	123.883	139.868	177.3	236.295	199.24
89.975	0.952209	0.343992	-2.76812	0.00563814	0.10584	ENSMUSG00000003051.13	Elf3	90.7772	35.0103	59.2232	108.992	90.8827	154.965
92.6891	-0.880094	0.318054	2.76712	0.00565542	0.105873	ENSMUSG00000045039.9	Megf8	112.053	151.711	98.2853	92.9192	49.0766	52.089
199.328	-0.806545	0.291526	2.76663	0.00566389	0.105873	ENSMUSG00000068749.9	Psma5	309.21	210.062	245.713	225.015	101.789	104.178
75.6171	3.19943	1.15667	-2.76606	0.00567374	0.105873	ENSMUSG00000029813.8	Doxl1	18.4391	13.4655	12.6007	20.0906	42.7149	346.392
170.365	0.61079	0.220779	-2.76652	0.00566582	0.105873	ENSMUSG00000027035.10	Cers6	146.095	137.348	120.966	187.848	237.204	192.729
12.9595	-1.90209	0.688265	2.7636	0.00571676	0.106517	ENSMUSG00000039956.9	Mrap	9.92876	26.0333	25.2014	5.02266	6.36179	5.2089
650.029	0.516489	0.187137	-2.75995	0.00578098	0.107394	ENSMUSG00000029407.10	Uso1	529.061	597.869	475.046	599.706	910.644	787.846
100.568	-0.811	0.293795	2.76043	0.00577255	0.107394	ENSMUSG00000049086.8	Bmyc	117.727	120.292	148.688	100.453	56.3473	59.9023
279.793	0.55157	0.200002	-2.75783	0.00581867	0.107934	ENSMUSG00000022685.9	Parn	215.596	226.221	238.153	280.767	398.975	319.045
41.8832	1.55362	0.564133	-2.754	0.00588714	0.108242	ENSMUSG00000057615.5	Ldoc1	17.0207	18.8517	27.7215	67.8059	11.8147	108.085
195.314	-0.582218	0.21136	2.75463	0.00587588	0.108242	ENSMUSG00000026032.8	Ndufb3	255.311	219.937	229.332	180.314	137.233	149.756
100.432	-0.770376	0.279638	2.75491	0.00587085	0.108242	ENSMUSG00000074405.8	Zfp865	116.308	134.655	131.047	96.9374	66.3443	57.2979
73.5036	-0.818997	0.297375	2.75409	0.00588561	0.108242	ENSMUSG00000038500.15	Prr3	95.0324	82.5885	103.326	51.7334	44.5325	63.809
39.1184	-1.1162	0.405155	2.755	0.00586921	0.108242	ENSMUSG00000033416.15	Gucd1	55.3174	50.2712	56.703	32.6473	25.4471	14.3245
33.969	1.29333	0.469589	-2.75417	0.00588404	0.108242	ENSMUSG00000019779.15	Frk	19.8575	24.2379	13.8607	31.6428	39.9884	74.2268
268.417	0.607169	0.220691	-2.75122	0.00593739	0.108387	ENSMUSG00000021665.9	Hexb	205.667	224.425	206.651	245.106	413.516	315.138
863.32	0.421252	0.153042	-2.75252	0.00591393	0.108387	ENSMUSG00000019916.14	P4ha1	723.381	783.693	704.378	892.527	974.262	1101.68
1600.62	-0.571939	0.207777	2.75265	0.00591143	0.108387	ENSMUSG00000030189.15	Ybx3	2018.37	1876.19	1852.3	1820.71	1093.32	942.811
550.775	-0.485759	0.176568	2.75112	0.00593921	0.108387	ENSMUSG00000021144.14	Mta1	573.031	651.731	701.858	478.157	378.981	520.89
91.0169	-0.830179	0.301738	2.75132	0.00593554	0.108387	ENSMUSG00000051346.9	Spryd4	146.095	87.077	118.446	81.8694	52.7119	59.9023
233.268	0.570169	0.207282	-2.75069	0.00594696	0.108387	ENSMUSG00000055839.6	Elob	205.667	181.336	175.149	250.129	252.654	334.672
57.8076	-0.985043	0.358171	2.7502	0.00595584	0.108391	ENSMUSG00000042978.11	Sbk1	83.6852	87.9747	60.4832	54.2447	31.8089	28.6489
100.64	0.812448	0.295576	-2.74869	0.00598335	0.108576	ENSMUSG00000022186.14	Oxct1	92.1956	68.2252	57.9631	94.9283	129.053	161.476
177.053	0.577666	0.21014	-2.74896	0.00597846	0.108576	ENSMUSG00000021171.8	Esyt2	147.513	148.121	129.787	196.888	219.936	220.076
2274.6	0.528016	0.192181	-2.7475	0.00600516	0.108814	ENSMUSG00000060093.6	H4c1	1947.46	1989.3	1648.17	2073.35	2393.85	3595.44
3063.91	0.373114	0.135928	-2.74494	0.00605221	0.10935	ENSMUSG00000050953.10	Gja1	2731.83	2800.83	2478.55	3767	3383.56	3221.7
122.466	0.770393	0.280644	-2.74509	0.00604944	0.10935	ENSMUSG00000035311.16	Gnptab	95.0324	87.9747	86.9447	104.471	157.227	203.147
197.809	-0.66205	0.241254	2.7442	0.00606578	0.109437	ENSMUSG00000051495.7	Irf2bp2	256.729	246.868	226.812	207.436	122.692	126.316
23.7719	1.42094	0.517921	-2.74354	0.00607807	0.109502	ENSMUSG00000021758.14	Ddx4	14.1839	10.7724	13.8607	23.6065	46.3502	33.8578
72.4762	-0.889596	0.324466	2.74172	0.00611181	0.109951	ENSMUSG00000050105.5	Grrp1	116.308	85.2816	83.1645	67.8059	44.5325	37.7645
145.679	-0.61144	0.223063	2.7411	0.0061233	0.11	ENSMUSG00000027331.15	Knstrn	158.86	193.903	175.149	116.023	118.147	111.991
140.929	0.656896	0.239776	-2.73963	0.0061509	0.110324	ENSMUSG00000030929.17	Eri2	104.961	101.44	120.966	141.137	190.854	186.218
7615.99	-0.413626	0.151003	2.73919	0.00615899	0.110324	ENSMUSG00000058773.2	H1f5	9289.06	7395.26	9421.53	7197.98	6666.24	5725.88
276.932	-0.727612	0.265729	2.73817	0.00617823	0.110511	ENSMUSG00000046434.16	Hnrnpa1	391.477	340.229	308.717	311.907	179.039	130.222
69.537	0.975194	0.356319	-2.73686	0.00620294	0.110795	ENSMUSG00000048612.16	Myof	53.899	53.862	31.5017	61.2765	89.065	127.618
1403.92	-0.502479	0.183813	2.73365	0.0062637	0.111668	ENSMUSG00000063511.11	Snrnp70	1690.73	1965.07	1284.01	1379.22	1088.77	1015.74
175.034	0.74918	0.27409	-2.73333	0.0062697	0.111668	ENSMUSG00000026773.19	Pfkfb3	85.1036	168.768	134.827	193.372	179.039	289.094
509.703	0.452266	0.16554	-2.73206	0.00629396	0.111941	ENSMUSG00000031862.11	Atp13a1	415.589	466.804	409.522	628.837	615.276	522.192
111.053	0.750172	0.27474	-2.73048	0.00632425	0.112161	ENSMUSG00000042797.9	Aqp11	90.7772	65.5321	91.9849	106.983	150.865	160.174
1411.51	0.497474	0.18217	-2.73083	0.00631747	0.112161	ENSMUSG00000026219.14	Trip12	1086.49	1174.19	1249.99	1343.56	2139.38	1475.42
447.241	-0.659232	0.24153	2.7294	0.00634495	0.112369	ENSMUSG00000024012.18	Mtch1	513.459	559.267	574.591	517.334	263.56	255.236
144.497	2.05897	0.754981	-2.72717	0.00638794	0.112971	ENSMUSG00000069045.11	Ddx3y	18.4391	32.3172	117.186	253.142	254.471	191.427
401.249	0.613707	0.22509	-2.72649	0.0064011	0.113044	ENSMUSG00000026361.9	Cdc73	270.913	331.252	346.519	323.962	576.196	558.654
14.1613	2.46612	0.904873	-2.72538	0.00642279	0.113267	ENSMUSG00000022661.14	Cd200	4.25518	3.5908	5.04027	15.5703	1.81765	54.6934
3467.46	-0.500245	0.183598	2.72468	0.00643636	0.113347	ENSMUSG00000051695.6	Pcbp1	4309.08	3782.01	4102.78	3775.53	2631.96	2203.36
33.4087	-3.40432	1.24985	2.72378	0.00645389	0.113496	ENSMUSG00000049235.8	Gm7324	72.3381	61.0436	50.4027	14.0635	0	2.60445
1241.02	0.372522	0.136815	-2.72281	0.00647295	0.113671	ENSMUSG00000025289.15	Prdx4	1075.14	1051.21	1118.94	1356.62	1476.84	1367.34
613.436	-0.49659	0.182611	2.71938	0.00654036	0.114694	ENSMUSG00000035674.13	Ndufa3	794.301	624.8	738.4	610.756	425.331	487.032
544.514	-0.494815	0.182168	2.71626	0.00660239	0.115415	ENSMUSG00000033020.7	Polr2f	587.215	647.242	676.656	509.8	352.625	493.543
74.1471	-0.823004	0.30308	2.71546	0.0066183	0.115415	ENSMUSG00000026974.11	Zmynd19	87.9404	101.44	93.245	49.2221	42.7149	70.3201
86.1441	-0.814032	0.299762	2.71559	0.00661573	0.115415	ENSMUSG00000072694.8	1500011B03Rik	123.4	90.6678	117.186	79.3581	46.3502	59.9023
103.896	-0.835634	0.307601	2.71661	0.00659538	0.115415	ENSMUSG00000046058.7	Eid2	140.421	137.348	124.747	111.001	59.0737	50.7868
13.706	2.03978	0.751863	-2.71297	0.00666832	0.115643	ENSMUSG00000034645.14	Zyg11a	1.41839	5.3862	8.82047	10.5476	20.903	35.1601
460.944	-0.730965	0.269404	2.71327	0.00666225	0.115643	ENSMUSG00000033938.5	Ndufb7	601.399	502.712	624.994	525.873	189.036	321.65
217.851	-0.548581	0.202164	2.71354	0.00665677	0.115643	ENSMUSG00000029625.16	Cpsf4	249.637	268.412	258.314	192.87	149.048	188.823
33.9884	-1.34267	0.494835	2.71338	0.00666014	0.115643	ENSMUSG00000078570.10	1110065P20Rik	62.4093	40.3965	45.3624	33.6518	9.08827	13.0222
551.458	0.683144	0.251854	-2.71246	0.00667867	0.115662	ENSMUSG00000002052.6	Supt6	337.578	445.26	487.646	673.037	961.539	403.69
185.312	0.672951	0.248161	-2.71175	0.006693	0.11575	ENSMUSG00000025915.14	Sgk3	153.187	128.371	146.168	157.712	279.01	247.423
139.923	-0.865845	0.319804	2.70743	0.00678071	0.116926	ENSMUSG00000095440.2	Fignl2	167.37	175.052	202.871	161.73	60.8914	71.6224
221.304	0.566025	0.209124	-2.70665	0.00679666	0.116926	ENSMUSG00000039286.12	Fndc3b	156.023	188.517	189.01	224.011	298.095	272.165
127.473	-0.67206	0.248349	2.70611	0.00680768	0.116926	ENSMUSG00000024177.9	Nme4	184.391	135.553	149.948	98.9464	82.7032	113.294
86.6022	-0.813031	0.300416	2.70635	0.00680264	0.116926	ENSMUSG00000021905.14	Dph3	127.655	101.44	102.065	69.815	41.806	76.8313
558.884	0.496007	0.183232	-2.70699	0.00678959	0.116926	ENSMUSG00000036693.12	Nop14	472.325	502.712	414.562	544.959	789.77	628.975
7.03352	4.08462	1.50999	-2.70507	0.00682904	0.117132	ENSMUSG00000028749.7	Pla2g2f	1.41839	0.897701	0	6.02719	0	33.8578
537.383	-0.452656	0.167397	2.70408	0.00684939	0.117142	ENSMUSG00000017716.15	Birc5	652.461	583.505	628.774	504.777	389.887	464.894
128.806	0.702231	0.259732	-2.70368	0.00685771	0.117142	ENSMUSG00000039704.7	Lmbrd2	99.2876	105.929	88.2047	129.082	204.486	145.849
525.621	-0.587727	0.217353	2.70402	0.00685056	0.117142	ENSMUSG00000029661.16	Col1a2	653.88	661.605	582.151	585.642	325.36	345.09
485.99	-0.55738	0.206207	2.70301	0.00687149	0.117218	ENSMUSG00000020167.14	Tcf3	556.01	589.789	593.492	521.352	297.186	358.112
189.218	0.655006	0.242393	-2.70225	0.00688726	0.117327	ENSMUSG00000037071.3	Scd1	188.646	140.939	112.146	251.635	185.401	256.538
331.067	1.52277	0.563716	-2.7013	0.00690685	0.117501	ENSMUSG00000029322.12	Plac8	180.136	147.223	185.23	390.261	225.389	858.166
195.669	-0.605648	0.224375	2.69927	0.00694914	0.11806	ENSMUSG00000038156.16	Spon1	231.198	257.64	221.772	194.377	133.598	135.431
158.921	-0.799038	0.296293	2.69678	0.00700127	0.118503	ENSMUSG00000015943.11	Bola1	228.361	194.801	185.23	175.793	69.0708	100.271
400.273	1.25302	0.464656	-2.69667	0.00700361	0.118503	ENSMUSG00000031762.7	Mt2	283.679	139.144	287.295	454.551	394.431	842.54
2560.76	0.452542	0.167778	-2.69727	0.00699103	0.118503	ENSMUSG00000031447.7	Lamp1	2404.18	1973.15	2108.09	2327.5	3107.28	3444.38
253.117	0.63199	0.23442	-2.69597	0.00701834	0.118592	ENSMUSG00000031402.12	Mpp1	180.136	193.903	220.512	224.513	405.337	294.303
37.9721	1.07856	0.401044	-2.68938	0.00715848	0.120713	ENSMUSG00000021752.13	Kctd6	25.5311	23.3402	23.9413	39.679	55.4384	59.9023
748.643	0.567875	0.211171	-2.68916	0.00716312	0.120713	ENSMUSG00000024556.4	Me2	632.604	564.654	609.873	584.638	999.709	1100.38
84.5755	-0.992455	0.369144	2.68853	0.00717677	0.12078	ENSMUSG00000057751.14	Megf6	100.706	147.223	91.9849	93.4215	36.3531	37.7645
192.638	-0.62541	0.233263	2.68114	0.00733721	0.121681	ENSMUSG00000018677.9	Slc25a39	248.219	199.29	257.054	191.866	131.78	127.618
57.6813	-0.926497	0.345361	2.6827	0.00730314	0.121681	ENSMUSG00000039105.6	Atp6v1g1	78.0117	85.2816	64.2635	40.6836	51.8031	26.0445
493.462	0.561432	0.209338	-2.68194	0.00731974	0.121681	ENSMUSG00000026175.12	Vil1	384.385	382.42	428.423	446.012	784.317	535.214
936.948	0.441351	0.164491	-2.68313	0.00729374	0.121681	ENSMUSG00000062006.12	Rpl34	790.045	836.657	757.301	999.007	1293.26	945.415
325.592	0.617334	0.230148	-2.68234	0.00731087	0.121681	ENSMUSG00000042133.16	Ppig	241.127	285.469	241.933	268.21	505.308	411.503
120.247	0.657438	0.245035	-2.68304	0.00729566	0.121681	ENSMUSG00000024132.6	Eci1	106.38	80.7931	93.245	135.11	153.592	152.36
49.1435	-1.1011	0.410325	2.68348	0.007286	0.121681	ENSMUSG00000012405.16	Rpl15	78.0117	67.3275	57.9631	50.7289	19.9942	20.8356
248.433	0.560284	0.208757	-2.68391	0.00727665	0.121681	ENSMUSG00000029569.9	Tmem168	207.086	197.494	196.571	234.558	346.263	308.627
17.8202	-1.90509	0.709881	2.68368	0.00728176	0.121681	ENSMUSG00000049916.12	2610318N02Rik	15.6023	28.7264	41.5822	16.0725	3.63531	1.30222
74.762	2.16683	0.80809	-2.68142	0.00733099	0.121681	ENSMUSG00000021403.3	Serpinb9b	25.5311	26.931	28.9816	69.815	38.1707	259.143
143.815	0.683478	0.254798	-2.68243	0.00730886	0.121681	ENSMUSG00000005949.9	Ctns	109.216	90.6678	131.047	137.621	208.121	186.218
51.0554	-0.997927	0.372338	2.68017	0.00735856	0.121874	ENSMUSG00000027597.15	Ahcy	66.6645	76.3046	63.0034	47.7153	31.8089	20.8356
1637.9	0.42242	0.157791	-2.67708	0.00742665	0.122404	ENSMUSG00000010095.13	Slc3a2	1619.81	1265.76	1314.25	1641.41	2057.58	1928.6
369.281	0.594701	0.222078	-2.67789	0.00740882	0.122404	ENSMUSG00000029422.15	Rsrc2	278.005	332.149	269.654	305.88	541.661	488.334
45.8227	-0.951055	0.355239	2.67723	0.00742343	0.122404	ENSMUSG00000038000.10	Acd	58.1542	59.2482	64.2635	35.6609	26.356	31.2534
51.259	1.1372	0.424875	-2.67655	0.00743847	0.122404	ENSMUSG00000059708.12	Akap17b	38.2966	40.3965	16.3809	39.679	88.1562	84.6446
49.6889	1.11604	0.416975	-2.67651	0.00743943	0.122404	ENSMUSG00000004951.10	Hspb1	29.7863	26.931	36.542	44.1994	49.9855	110.689
18.2083	1.67611	0.626602	-2.67492	0.0074746	0.122821	ENSMUSG00000031165.6	Was	9.92876	7.1816	8.82047	24.1088	13.6324	45.5779
70.1753	-0.958344	0.358362	2.67424	0.00748994	0.122912	ENSMUSG00000078572.3	Ndufaf8	85.1036	97.8494	97.0252	73.8331	28.1736	39.0667
122.039	0.634197	0.237214	-2.67353	0.0075058	0.122944	ENSMUSG00000021585.10	Cast	93.614	96.054	97.0252	140.132	160.862	144.547
730.138	-0.419179	0.156804	2.67327	0.00751155	0.122944	ENSMUSG00000019923.14	Zwint	863.802	804.34	841.725	708.698	597.099	565.166
22.5696	-1.51522	0.567433	2.67031	0.00757807	0.123388	ENSMUSG00000044186.10	Nkx2-6	31.2047	40.3965	30.2416	21.0952	7.27061	5.2089
270.003	0.495347	0.185493	-2.67043	0.00757535	0.123388	ENSMUSG00000053460.8	Ggcx	217.014	214.55	241.933	334.007	320.816	291.698
35.5779	1.34629	0.504098	-2.67068	0.00756974	0.123388	ENSMUSG00000078429.9	Ctdsp2	28.3679	22.4425	8.82047	34.6564	34.5354	84.6446
238.429	0.618906	0.231768	-2.67037	0.00757667	0.123388	ENSMUSG00000030761.16	Myo7a	158.86	202.88	201.611	244.604	381.707	240.912
33.409	-1.15255	0.431832	2.66898	0.00760829	0.123719	ENSMUSG00000039725.6	Trp53rka	58.1542	38.6011	42.8423	25.1133	22.7207	13.0222
43.2794	-1.20654	0.452752	2.6649	0.00770118	0.124582	ENSMUSG00000050503.9	Fbxl22	51.0622	66.4298	65.5235	45.7062	12.7236	18.2311
460.956	0.458413	0.172002	-2.66516	0.00769511	0.124582	ENSMUSG00000024817.13	Uhrf2	405.661	360.876	398.181	466.103	597.099	537.819
760.328	0.429491	0.161122	-2.66563	0.00768445	0.124582	ENSMUSG00000036323.14	Srp72	655.298	644.549	642.635	743.354	990.621	885.513
84.8538	-0.776601	0.291352	2.66551	0.00768723	0.124582	ENSMUSG00000046934.5	Csl	102.124	104.133	117.186	80.3626	54.5296	50.7868
111.014	0.696668	0.261605	-2.66306	0.00774345	0.125104	ENSMUSG00000073139.9	Tmem185a	83.6852	70.9183	99.5453	116.526	150.865	144.547
27.649	-1.50332	0.565484	2.65847	0.00784966	0.126007	ENSMUSG00000063480.8	Snu13	51.0622	35.908	37.802	28.1269	9.08827	3.90667
8.58876	2.6705	1.00392	-2.66006	0.00781267	0.126007	ENSMUSG00000044626.13	Liph	2.83679	2.6931	1.26007	8.03626	5.45296	31.2534
225.223	0.508313	0.191153	-2.6592	0.00783266	0.126007	ENSMUSG00000066441.14	Rdh11	188.646	177.745	191.53	256.658	267.195	269.561
77.8604	-0.804093	0.302351	2.65946	0.00782649	0.126007	ENSMUSG00000027330.16	Cdc25b	109.216	88.8724	99.5453	50.7289	74.5238	44.2756
5667.6	0.371046	0.139558	-2.65872	0.0078439	0.126007	ENSMUSG00000020368.15	Canx	4950.2	5038.79	4837.4	5574.65	7201.54	6403.04
645.053	0.474892	0.17874	-2.65688	0.0078867	0.12644	ENSMUSG00000042323.17	Pbrm1	537.571	550.29	530.488	619.796	922.459	709.713
353.768	0.457219	0.17216	-2.65578	0.00791243	0.126632	ENSMUSG00000025816.15	Sec61a2	295.026	298.934	301.156	409.849	442.599	375.041
104.881	-0.905996	0.341176	2.65551	0.00791895	0.126632	ENSMUSG00000075227.6	Znhit2	151.768	140.939	120.966	115.019	65.4355	35.1601
462.918	0.515784	0.194383	-2.65344	0.0079676	0.126763	ENSMUSG00000026353.9	Ubxn4	391.477	381.523	367.94	407.338	628.908	600.326
467.797	0.590737	0.222546	-2.65445	0.00794383	0.126763	ENSMUSG00000033860.13	Fgg	368.782	387.807	361.639	379.211	750.691	558.654
778.684	-0.467421	0.176153	2.6535	0.00796616	0.126763	ENSMUSG00000038690.15	Atp5j2	940.395	826.782	948.831	799.608	613.458	543.028
251.19	0.608288	0.229182	-2.65417	0.00795046	0.126763	ENSMUSG00000061859.17	Patj	199.994	234.3	161.289	249.626	387.16	274.769
29.1094	1.39863	0.527566	-2.65111	0.00802285	0.12748	ENSMUSG00000117809.1	Gm50478	11.3472	21.5448	13.8607	20.5929	40.8972	66.4135
558.73	0.502998	0.189851	-2.64943	0.00806267	0.12795	ENSMUSG00000004270.13	Lpcat3	512.04	401.272	472.525	511.307	693.435	761.802
52.5593	-1.01216	0.382328	2.64736	0.00811222	0.128416	ENSMUSG00000034164.17	Emid1	46.807	80.7931	84.4245	48.7198	27.2648	27.3467
82.131	0.86627	0.327222	-2.64735	0.00811256	0.128416	ENSMUSG00000057440.8	Mpp7	58.1542	68.2252	46.6225	67.8059	130.871	121.107
135.099	0.636461	0.24051	-2.6463	0.00813784	0.128492	ENSMUSG00000006301.17	Tmbim1	120.563	104.133	91.9849	141.137	171.768	181.009
257.417	0.63769	0.240943	-2.64664	0.00812966	0.128492	ENSMUSG00000024290.9	Rock1	174.462	231.607	195.31	210.45	377.163	355.507
388.477	-0.550027	0.207913	2.64547	0.0081578	0.128645	ENSMUSG00000031807.10	Pgls	500.693	419.226	467.485	392.27	230.842	320.347
314.819	0.468447	0.177132	-2.64462	0.0081782	0.128804	ENSMUSG00000000078.7	Klf6	287.934	258.538	246.973	381.22	353.534	360.716
27.7565	1.72997	0.65443	-2.64348	0.0082058	0.12884	ENSMUSG00000045827.10	Serpinb9	8.51036	18.8517	10.0805	18.5838	15.4501	95.0624
44.5759	-1.03069	0.390245	2.64114	0.00826277	0.12884	ENSMUSG00000038886.10	Man2a2	65.2461	69.1229	46.6225	40.1813	25.4471	20.8356
2485.79	-0.565071	0.213791	2.6431	0.00821517	0.12884	ENSMUSG00000057113.13	Npm1	3052.38	3070.14	2782.23	2884.01	1740.4	1385.57
140.339	-0.72212	0.273347	2.64177	0.0082475	0.12884	ENSMUSG00000060572.17	Mfap2	154.605	194.801	176.409	144.15	71.7973	100.271
906.666	0.453371	0.171564	-2.64258	0.0082277	0.12884	ENSMUSG00000041360.8	Pum3	834.016	705.593	756.041	855.359	1234.19	1054.8
519.729	-0.481647	0.182175	2.64388	0.00819629	0.12884	ENSMUSG00000071655.12	Ubxn1	612.746	596.073	612.393	527.379	420.787	348.996
38.7142	-1.07072	0.405341	2.64153	0.00825326	0.12884	ENSMUSG00000029765.12	Plxna4	49.6438	59.2482	49.1426	33.1496	16.3589	24.7423
688.983	-0.431303	0.163262	2.64178	0.00824707	0.12884	ENSMUSG00000058799.16	Nap1l1	784.372	806.135	779.982	490.714	639.814	632.881
109.944	0.778974	0.295053	-2.64011	0.00828785	0.12907	ENSMUSG00000052812.5	Atad2b	60.9909	85.2816	95.7651	107.485	189.036	121.107
728.724	0.493265	0.187073	-2.63675	0.00837051	0.129376	ENSMUSG00000033166.11	Dis3	574.45	631.084	608.613	661.987	1070.6	825.611
153.086	-0.634877	0.240665	2.63801	0.00833948	0.129376	ENSMUSG00000060636.14	Rpl35a	225.525	140.041	194.05	116.526	119.965	122.409
240.667	0.569136	0.215864	-2.63655	0.00837526	0.129376	ENSMUSG00000037278.9	Tmem97	198.575	206.471	173.889	225.518	294.46	345.09
59.522	-0.864104	0.327594	2.63773	0.00834624	0.129376	ENSMUSG00000037296.7	Lsm1	85.1036	76.3046	70.5638	52.7379	37.2619	35.1601
1906.78	-0.500033	0.189697	2.63595	0.00839016	0.129376	ENSMUSG00000100210.2	H3c7	2341.77	2140.12	2225.28	2131.62	1329.61	1272.27
126.807	-0.656689	0.249008	2.63722	0.0083588	0.129376	ENSMUSG00000029641.8	Rasl11a	171.626	143.632	152.468	120.042	84.5209	88.5513
41.6469	-1.00672	0.381871	2.6363	0.00838166	0.129376	ENSMUSG00000021850.14	ccdc198	52.4806	49.3735	64.2635	21.0952	32.7178	29.9512
25.0138	-1.33578	0.50671	2.63619	0.00838433	0.129376	ENSMUSG00000062248.5	Cks2	51.0622	20.6471	36.542	15.5703	14.5412	11.72
146.454	-0.663786	0.251918	2.63493	0.0084155	0.129605	ENSMUSG00000078184.1	Rbm8a2	192.902	189.415	158.769	147.666	93.6092	96.3646
315.606	0.573769	0.217791	-2.63449	0.0084263	0.129605	ENSMUSG00000031714.9	Gab1	269.495	248.663	240.673	267.206	414.425	453.174
192.793	0.680538	0.258357	-2.6341	0.00843604	0.129605	ENSMUSG00000040297.12	Suco	133.329	157.098	151.208	166.752	216.301	332.067
114.054	0.73476	0.279031	-2.63326	0.00845703	0.129768	ENSMUSG00000026678.10	Rgs5	72.3381	90.6678	94.5051	185.838	108.15	132.827
244.946	-2.63655	1.00159	2.63237	0.00847908	0.129947	ENSMUSG00000037805.15	Rpl10a	503.53	418.328	345.259	165.246	19.0854	18.2311
14.0839	-1.67447	0.636653	2.63012	0.00853548	0.130492	ENSMUSG00000064356.3	mt-Atp8	15.6023	28.7264	20.1611	7.53399	7.27061	5.2089
57.7182	0.955756	0.363369	-2.63026	0.00853188	0.130492	ENSMUSG00000020650.15	Bcap29	34.0415	42.1919	40.3222	47.7153	90.8827	91.1557
164.877	-0.567177	0.215872	2.62738	0.00860451	0.131387	ENSMUSG00000028883.17	Sema3a	207.086	194.801	190.27	141.639	140.868	114.596
427.38	0.462636	0.176138	-2.62656	0.00862535	0.131545	ENSMUSG00000039671.18	Zmynd8	338.996	390.5	347.779	459.574	571.652	455.779
267.639	-0.702805	0.267673	2.62561	0.0086494	0.131751	ENSMUSG00000049751.6	Rpl36al	347.507	272.003	379.28	305.88	143.595	157.569
459.841	0.568158	0.216438	-2.62504	0.00866395	0.131812	ENSMUSG00000037544.14	Dlgap5	334.741	387.807	388.101	443.501	754.326	450.57
305.066	0.688774	0.262563	-2.62327	0.008709	0.13226	ENSMUSG00000040481.17	Bptf	160.279	301.627	236.893	298.848	528.028	304.721
254.597	-0.633451	0.241494	2.62305	0.00871454	0.13226	ENSMUSG00000062270.14	Morf4l1	313.465	278.287	340.218	273.735	140.868	181.009
54.4528	-1.11559	0.42542	2.62233	0.0087332	0.132383	ENSMUSG00000062825.15	Actg1	68.0829	83.4862	74.344	61.2765	19.9942	19.5334
83.3797	-0.758635	0.289438	2.62106	0.0087657	0.132715	ENSMUSG00000040767.10	Snrnp25	109.216	84.3839	122.227	71.3218	54.5296	58.6001
1759.57	0.521898	0.199217	-2.61975	0.00879952	0.133066	ENSMUSG00000034349.14	Smc4	1428.32	1495.57	1407.5	1375.2	2590.16	2260.66
4284.39	0.419475	0.160231	-2.61793	0.0088464	0.133453	ENSMUSG00000027184.14	Caprin1	3730.38	3943.6	3321.54	4069.36	5879.2	4762.24
205.79	0.535655	0.204609	-2.61795	0.00884608	0.133453	ENSMUSG00000030188.12	Magohb	157.442	165.177	180.19	225.015	230.842	276.072
1904.7	-0.359724	0.137528	2.61563	0.00890621	0.134193	ENSMUSG00000020180.10	Snrpd3	2161.63	1952.5	2310.96	1710.72	1704.96	1587.41
932.119	0.436168	0.166795	-2.615	0.00892287	0.134283	ENSMUSG00000020664.10	Dld	801.393	783.693	790.062	870.427	1253.27	1093.87
155.337	-0.578641	0.221495	2.61244	0.00898988	0.135129	ENSMUSG00000037204.7	Atg101	178.718	193.006	187.75	142.141	114.512	115.898
136.193	-0.692204	0.265043	2.61167	0.00901016	0.135271	ENSMUSG00000048755.9	Mcat	168.789	173.256	165.069	141.639	77.2503	91.1557
22.3085	-1.37758	0.527772	2.61018	0.00904935	0.135672	ENSMUSG00000059674.7	Cdh24	22.6943	42.1919	31.5017	14.5657	7.27061	15.6267
157.018	0.567215	0.217337	-2.60984	0.00905853	0.135672	ENSMUSG00000024077.15	Strn	120.563	128.371	129.787	172.78	192.671	197.938
38.7006	-1.10277	0.42266	2.60911	0.00907768	0.135796	ENSMUSG00000079243.4	Xirp1	60.9909	57.4528	41.5822	36.1632	19.0854	16.9289
331.587	0.560517	0.215303	-2.60338	0.00923084	0.137431	ENSMUSG00000036916.13	Zfp280c	258.148	232.504	312.497	297.342	476.225	412.805
84.9257	-0.748385	0.287466	2.60339	0.00923065	0.137431	ENSMUSG00000006215.12	Zbtb17	100.706	105.929	114.666	76.8467	64.5267	46.8801
284.466	0.485073	0.186279	-2.60401	0.00921399	0.137431	ENSMUSG00000031217.8	Efnb1	229.78	229.811	253.274	368.663	324.451	300.814
62.5926	0.909434	0.349308	-2.60353	0.00922692	0.137431	ENSMUSG00000054422.7	Fabp1	60.9909	36.8057	32.7618	61.7787	88.1562	95.0624
84.6151	0.803469	0.308733	-2.60247	0.00925552	0.137635	ENSMUSG00000020009.13	Ifngr1	73.7565	45.7827	65.5235	79.8603	119.056	123.711
118.546	-0.695627	0.267417	2.60128	0.00928758	0.137784	ENSMUSG00000017386.10	Traf4	117.727	159.791	162.549	107.987	68.162	95.0624
626.291	-0.530075	0.20376	2.60147	0.0092825	0.137784	ENSMUSG00000025204.10	Ndufb8	774.443	654.424	796.363	682.077	448.052	402.388
5.72555	-3.04713	1.17178	2.60043	0.0093107	0.137964	ENSMUSG00000062382.9	Ftl1-ps1	5.67358	11.6701	12.6007	0.502266	0	3.90667
169.853	-0.590896	0.227311	2.59951	0.0093357	0.138007	ENSMUSG00000041949.6	Tango6	224.106	176.847	212.951	153.693	110.877	140.64
40.6233	1.18103	0.454312	-2.5996	0.00933325	0.138007	ENSMUSG00000021054.6	Sgpp1	17.0207	25.1356	31.5017	46.2085	32.7178	91.1557
56.9353	-0.94125	0.362181	2.59884	0.00935405	0.138116	ENSMUSG00000051367.8	Six1	76.5933	87.9747	61.7433	55.7515	30.9001	28.6489
168.032	-0.635209	0.244592	2.59701	0.0094038	0.138687	ENSMUSG00000029213.11	Commd8	226.943	189.415	200.351	172.277	116.33	102.876
143.297	-0.696414	0.268206	2.59656	0.00941612	0.138705	ENSMUSG00000048826.7	Dact2	158.86	158.893	216.732	147.164	90.8827	87.2491
30.3455	-1.13271	0.436578	2.59452	0.0094723	0.139369	ENSMUSG00000058794.12	Nfe2	43.9702	42.1919	39.0621	17.077	25.4471	14.3245
223.266	-0.592086	0.228306	2.59339	0.00950344	0.139663	ENSMUSG00000019817.18	Plagl1	269.495	267.515	269.654	219.993	125.418	187.52
1968.12	-0.433112	0.167058	2.59258	0.00952601	0.139679	ENSMUSG00000032080.6	Apoa4	2255.25	2217.32	2310.96	1419.4	2103.03	1502.77
1941.33	0.419755	0.161909	-2.59255	0.00952687	0.139679	ENSMUSG00000025980.14	Hspd1	1565.91	1743.33	1672.11	1922.17	2715.57	2028.87
22.2326	-1.39956	0.540009	2.59173	0.00954949	0.139847	ENSMUSG00000050064.14	Zfp697	38.2966	20.6471	39.0621	17.5793	9.99709	7.81335
325.587	0.744361	0.287438	-2.58964	0.00960771	0.140535	ENSMUSG00000005413.8	Hmox1	272.332	214.55	241.933	329.487	236.295	658.926
933.672	0.370494	0.143157	-2.58802	0.0096528	0.140702	ENSMUSG00000022174.8	Dad1	853.873	807.033	783.762	1116.54	1004.25	1036.57
811.187	-0.455045	0.175809	2.58829	0.00964546	0.140702	ENSMUSG00000004667.18	Polr2e	1016.99	833.066	966.472	792.074	546.205	712.317
19.2836	1.47897	0.571364	-2.5885	0.00963954	0.140702	ENSMUSG00000047565.5	Acot10	5.67358	11.6701	12.6007	20.0906	31.8089	33.8578
413.507	0.492578	0.19065	-2.58367	0.00977542	0.142133	ENSMUSG00000024331.11	Dsc2	384.385	283.673	362.899	405.831	520.758	523.494
203.823	0.599424	0.231977	-2.58397	0.0097669	0.142133	ENSMUSG00000026153.15	Fam135a	147.513	179.54	156.248	188.35	242.657	308.627
534.187	0.503024	0.194719	-2.58334	0.00978502	0.142133	ENSMUSG00000023852.14	Chd1	387.222	520.666	415.822	531.9	775.229	574.281
766.899	-0.419611	0.16251	2.58207	0.009821	0.14249	ENSMUSG00000024742.15	Fen1	965.926	836.657	834.165	754.404	621.637	588.606
431.695	-0.473911	0.183737	2.57929	0.00990025	0.143473	ENSMUSG00000049532.11	Sall2	492.183	561.063	454.884	415.876	365.348	300.814
149.827	0.649589	0.252055	-2.57717	0.00996135	0.143859	ENSMUSG00000016481.15	Cr1l	116.308	101.44	131.047	140.635	179.039	230.494
409.194	0.492299	0.191001	-2.57746	0.00995282	0.143859	ENSMUSG00000032328.12	Tmem30a	353.18	322.275	342.738	374.188	508.034	554.748
63.2065	-0.810472	0.314462	2.57733	0.00995671	0.143859	ENSMUSG00000051319.6	Mtln	82.2669	66.4298	93.245	48.2176	40.8972	48.1823
732.445	0.374253	0.145318	-2.5754	0.0100124	0.144264	ENSMUSG00000019188.16	H13	617.001	638.265	657.755	800.11	832.485	849.051
115.791	-0.671392	0.260658	2.57576	0.0100019	0.144264	ENSMUSG00000038268.4	Ovca2	146.095	126.576	154.988	103.467	67.2532	96.3646
6.1059	-2.56838	0.997469	2.57489	0.0100271	0.144309	ENSMUSG00000038524.13	Fchsd1	9.92876	8.97701	12.6007	2.00906	1.81765	1.30222
69.8472	-0.855164	0.33219	2.57432	0.0100437	0.144382	ENSMUSG00000022475.19	Hdac7	96.4508	101.44	73.0839	66.2991	33.6266	48.1823
110.916	0.660348	0.256623	-2.57322	0.0100756	0.144675	ENSMUSG00000033769.16	Exoc6b	72.3381	84.3839	100.805	125.064	152.683	130.222
511.334	0.415118	0.161629	-2.56834	0.0102188	0.146564	ENSMUSG00000032435.9	Dync1li1	418.426	448.85	446.064	530.393	634.361	589.908
20.7314	-1.47035	0.572752	2.56716	0.0102534	0.146892	ENSMUSG00000018654.17	Ikzf1	42.5518	26.931	22.6812	11.0499	17.2677	3.90667
141.163	0.649051	0.252883	-2.56661	0.0102698	0.146958	ENSMUSG00000031843.2	Mphosph6	127.655	107.724	93.245	135.11	173.586	209.658
1566.59	0.559053	0.217889	-2.56577	0.0102946	0.147012	ENSMUSG00000028158.14	Mttp	1455.27	1070.06	1275.19	1270.73	2581.98	1746.28
2586.62	0.404225	0.157596	-2.56495	0.0103191	0.147012	ENSMUSG00000024359.10	Hspa9	2246.74	2175.13	2256.78	2439	3528.07	2874.01
85.9651	-0.944433	0.368214	2.5649	0.0103205	0.147012	ENSMUSG00000022803.12	Popdc2	96.4508	105.929	139.868	87.3943	62.709	23.44
302.739	0.496598	0.193612	-2.56491	0.0103202	0.147012	ENSMUSG00000024687.11	Osbp	239.709	245.97	265.874	290.812	380.798	393.272
680.466	-0.526824	0.205441	2.56436	0.0103365	0.14702	ENSMUSG00000033585.5	Ndn	938.977	703.797	771.161	726.277	421.696	520.89
117.158	-0.716158	0.279404	2.56316	0.0103723	0.14702	ENSMUSG00000052751.16	Repin1	154.605	151.711	133.567	119.037	85.4297	58.6001
89.0444	-0.698546	0.272492	2.56355	0.0103609	0.14702	ENSMUSG00000031816.15	Mthfsd	123.4	95.1563	113.406	73.3309	69.0708	59.9023
984.078	0.38147	0.148842	-2.56291	0.0103798	0.14702	ENSMUSG00000057841.5	Rpl32	877.986	845.634	839.205	1080.37	1012.43	1248.83
41.4143	-1.06763	0.416496	2.56336	0.0103666	0.14702	ENSMUSG00000003444.8	Med29	59.5726	45.7827	64.2635	38.6745	15.4501	24.7423
98.5224	-0.753431	0.294179	2.56113	0.0104331	0.147608	ENSMUSG00000001493.9	Meox1	102.124	154.405	115.926	95.4306	67.2532	55.9957
17.2582	1.8264	0.71327	-2.56061	0.010449	0.147666	ENSMUSG00000066000.12	Zfp979	2.83679	12.5678	6.30034	10.5476	21.8118	49.4845
594.652	-0.626625	0.244859	2.55913	0.0104936	0.147996	ENSMUSG00000024736.15	Tmem132a	733.31	754.966	681.697	715.729	355.351	326.858
17.1117	-1.56293	0.610745	2.55905	0.010496	0.147996	ENSMUSG00000095139.2	Pou3f2	41.1334	21.5448	13.8607	7.53399	8.17944	10.4178
1181.42	0.384656	0.150539	-2.55519	0.0106131	0.148886	ENSMUSG00000041028.16	Ghitm	1028.34	1040.44	1004.27	1171.79	1514.11	1329.57
385.851	0.539378	0.211108	-2.55498	0.0106193	0.148886	ENSMUSG00000031278.12	Acsl4	272.332	327.661	341.478	339.03	567.108	467.499
122.943	-0.687826	0.26926	2.55451	0.0106338	0.148886	ENSMUSG00000039041.15	Adrm1	139.003	149.916	168.849	125.567	82.7032	71.6224
641.666	0.446687	0.174881	-2.55423	0.0106424	0.148886	ENSMUSG00000022257.4	Laptm4b	543.245	519.769	569.551	857.871	767.05	592.512
29.6466	4.06828	1.59177	-2.55582	0.0105937	0.148886	ENSMUSG00000028965.13	Tnfrsf9	0	3.5908	6.30034	20.5929	5.45296	141.943
357.535	0.430185	0.1684	-2.55455	0.0106326	0.148886	ENSMUSG00000023021.15	Cers5	312.047	308.809	293.596	426.424	407.154	397.179
94.9399	-0.790312	0.30917	2.55624	0.0105811	0.148886	ENSMUSG00000025144.17	Cenpx	112.053	105.031	144.908	89.4034	42.7149	75.529
305.94	-0.504427	0.197534	2.55363	0.0106607	0.148976	ENSMUSG00000029545.13	Acads	398.569	348.308	332.658	304.373	219.936	231.796
148.224	0.653567	0.255984	-2.55316	0.0106751	0.149011	ENSMUSG00000020679.11	Hnf1b	116.308	113.11	114.666	126.571	209.03	209.658
7217.88	0.384752	0.150752	-2.55222	0.0107038	0.149245	ENSMUSG00000055653.13	Gpc3	6040.94	6546.93	6193.23	6911.68	9682.64	7931.85
735.265	0.479024	0.187756	-2.55131	0.0107319	0.14947	ENSMUSG00000027170.12	Eif3m	625.512	567.347	647.675	641.896	895.194	1033.97
296.119	0.611633	0.239891	-2.54963	0.0107839	0.149529	ENSMUSG00000079477.9	Rab7	198.575	237.891	263.354	263.69	314.454	498.752
114.795	-0.652886	0.256023	2.55011	0.0107689	0.149529	ENSMUSG00000066687.5	Zbtb16	133.329	156.2	131.047	97.9419	69.9797	100.271
23.0442	1.2939	0.507437	-2.54987	0.0107764	0.149529	ENSMUSG00000067878.13	Map7d3	14.1839	14.3632	11.3406	26.6201	41.806	29.9512
768.181	-0.514407	0.201688	2.5505	0.0107567	0.149529	ENSMUSG00000036199.9	Ndufa13	940.395	772.92	1001.75	826.73	482.587	584.699
8.86573	-2.20145	0.864136	2.54758	0.0108473	0.150211	ENSMUSG00000050854.9	Tmem125	17.0207	9.87471	17.6409	5.02266	3.63531	0
2317.33	0.402398	0.157972	-2.54727	0.010857	0.150211	ENSMUSG00000025544.13	Tm9sf2	2079.37	1921.08	1987.13	2165.77	3113.64	2637.01
73.0804	0.97661	0.384175	-2.5421	0.011019	0.151649	ENSMUSG00000022270.16	Retreg1	62.4093	45.7827	39.0621	47.213	137.233	106.782
25.0751	-1.1795	0.464038	2.54183	0.0110275	0.151649	ENSMUSG00000031425.15	Plp1	35.4599	32.3172	36.542	15.5703	13.6324	16.9289
366.342	0.470633	0.185112	-2.54242	0.0110088	0.151649	ENSMUSG00000028530.14	Jak1	343.251	316.888	260.834	386.745	476.225	414.108
165.074	0.601715	0.236643	-2.54272	0.0109995	0.151649	ENSMUSG00000031073.6	Fgf15	114.89	159.791	118.446	235.061	179.948	182.311
289.556	0.513428	0.201994	-2.5418	0.0110284	0.151649	ENSMUSG00000047036.8	Zfp445	232.617	254.947	226.812	284.283	414.425	324.254
23.6333	1.50683	0.592949	-2.54125	0.0110458	0.151649	ENSMUSG00000037411.10	Serpine1	18.4391	14.3632	3.7802	30.136	19.0854	55.9957
24.1284	1.52276	0.59921	-2.54128	0.0110449	0.151649	ENSMUSG00000002565.16	Scin	7.09197	10.7724	18.901	21.5974	19.9942	66.4135
34.829	-1.16134	0.457302	2.53954	0.0110999	0.152123	ENSMUSG00000034863.9	Ano8	45.3886	46.6804	54.1829	35.1586	14.5412	13.0222
718.862	-0.510116	0.200881	2.53939	0.0111046	0.152123	ENSMUSG00000002844.9	Adprh	843.944	855.509	839.205	797.096	530.755	446.663
260.198	-0.536036	0.211268	2.53723	0.0111735	0.1529	ENSMUSG00000018882.12	Mrpl45	313.465	286.366	327.618	267.206	188.127	178.405
265.072	-0.747367	0.29462	2.53671	0.01119	0.152958	ENSMUSG00000034880.7	Mrpl34	388.64	262.129	350.299	319.944	132.689	136.734
22.2931	-1.37361	0.542317	2.53285	0.011314	0.154317	ENSMUSG00000025352.6	Gdf11	24.1127	40.3965	31.5017	14.0635	5.45296	18.2311
2242.41	0.477981	0.18871	-2.53289	0.0113126	0.154317	ENSMUSG00000024391.7	Apom	2069.44	1534.17	2018.63	1913.13	3007.31	2911.77
2828.91	0.514144	0.203057	-2.53202	0.0113409	0.154515	ENSMUSG00000022150.16	Dab2	2245.32	2251.43	2491.15	2146.69	4206.96	3631.91
33.5933	-1.06629	0.421333	2.53074	0.0113821	0.154908	ENSMUSG00000034041.5	Lyl1	32.6231	54.7597	49.1426	25.1133	19.0854	20.8356
329.543	-0.483622	0.191139	2.53021	0.0113994	0.154975	ENSMUSG00000022338.8	Eny2	436.865	338.433	376.76	261.681	244.474	319.045
19.0612	-1.34318	0.531207	2.52855	0.0114534	0.15554	ENSMUSG00000022061.8	Nkx3-1	24.1127	31.4195	26.4614	11.0499	10.9059	10.4178
1531.25	-0.413375	0.163606	2.52666	0.0115153	0.156212	ENSMUSG00000003429.11	Rps11	1909.16	1564.69	1776.7	1529.4	1089.68	1317.85
2944.09	0.370522	0.146667	-2.52627	0.0115279	0.156213	ENSMUSG00000005610.17	Eif4g2	2543.18	2632.96	2525.18	2783.56	3648.03	3531.63
101.862	0.732374	0.290022	-2.52524	0.0115621	0.156402	ENSMUSG00000025504.14	Eps8l2	60.9909	72.7137	94.5051	95.4306	129.962	157.569
84.162	0.725415	0.287282	-2.52509	0.0115668	0.156402	ENSMUSG00000023902.18	Zscan10	73.7565	66.4298	50.4027	101.96	119.965	92.458
1556.06	0.460793	0.18255	-2.5242	0.0115961	0.156629	ENSMUSG00000030754.9	Copb1	1207.05	1354.63	1364.65	1338.04	2229.35	1842.65
100.471	-3.01064	1.19299	2.5236	0.0116159	0.156727	ENSMUSG00000094248.1	Hist1h2ao	252.474	187.619	97.0252	57.2583	4.54413	3.90667
64.7771	-1.10339	0.43741	2.52255	0.0116509	0.157029	ENSMUSG00000028332.13	Hemgn	76.5933	73.6115	114.666	19.5884	78.1591	26.0445
512.853	0.478795	0.189914	-2.52112	0.0116983	0.15733	ENSMUSG00000041846.15	Ppp4r3a	404.242	432.692	446.064	452.542	685.255	656.321
173.55	0.633989	0.251471	-2.52112	0.0116982	0.15733	ENSMUSG00000025616.14	Usp16	120.563	128.371	157.508	148.169	244.474	242.214
670.269	0.506167	0.200903	-2.51946	0.0117536	0.157566	ENSMUSG00000033831.5	Fgb	543.245	480.27	637.594	591.67	988.803	780.033
52.2077	-0.902099	0.358004	2.5198	0.011742	0.157566	ENSMUSG00000059325.14	Hopx	56.7358	78.1	69.3037	44.1994	24.5383	40.369
38.8042	1.30511	0.517916	-2.51992	0.0117381	0.157566	ENSMUSG00000002250.16	Ppard	14.1839	28.7264	22.6812	28.1269	33.6266	105.48
410.108	-0.429367	0.170456	2.51893	0.0117712	0.157633	ENSMUSG00000072582.9	Ptrh2	475.162	445.26	493.947	389.759	324.451	332.067
812.484	-0.449647	0.178559	2.51819	0.0117959	0.157795	ENSMUSG00000041697.8	Cox6a1	954.579	926.427	936.23	850.839	545.296	661.53
118.434	0.659982	0.26216	-2.51748	0.0118197	0.157946	ENSMUSG00000040413.15	Timd2	86.522	87.077	100.805	110.499	168.133	157.569
567.26	0.461285	0.183337	-2.51605	0.0118679	0.15829	ENSMUSG00000027706.8	Sec62	466.652	517.076	446.064	529.891	788.862	655.019
120.375	0.620906	0.246787	-2.51596	0.0118708	0.15829	ENSMUSG00000020311.17	Erlec1	95.0324	95.1563	93.245	122.051	152.683	164.08
45.5788	-0.989143	0.393212	2.51554	0.0118849	0.158303	ENSMUSG00000050188.8	Lsm10	82.2669	43.0896	57.9631	39.1768	23.6295	27.3467
170.231	0.583598	0.23203	-2.51518	0.0118971	0.158303	ENSMUSG00000027285.13	Haus2	163.115	114.906	131.047	171.273	223.571	217.472
137.034	0.67776	0.269633	-2.51364	0.0119492	0.158828	ENSMUSG00000018736.14	Ndel1	141.839	98.7471	75.6041	137.119	182.674	186.218
198.024	0.638374	0.254168	-2.51162	0.0120178	0.159571	ENSMUSG00000033837.5	Foxh1	209.922	125.678	132.307	297.844	233.568	188.823
1468.69	0.414964	0.165308	-2.51025	0.0120645	0.159693	ENSMUSG00000024360.8	Etf1	1282.23	1218.18	1275.19	1362.65	2023.96	1649.92
663.108	-0.475397	0.18944	2.50948	0.0120908	0.159693	ENSMUSG00000022450.6	Ndufa6	856.71	693.025	768.641	702.168	458.049	500.054
191.779	0.55735	0.222086	-2.50961	0.0120866	0.159693	ENSMUSG00000062170.12	Fmr1nb	143.258	144.53	177.67	199.4	273.557	212.263
196.559	0.680863	0.271265	-2.50995	0.0120747	0.159693	ENSMUSG00000079184.10	Mphosph8	113.472	147.223	191.53	177.3	336.266	213.565
40.1361	-1.06775	0.425296	2.5106	0.0120528	0.159693	ENSMUSG00000046997.5	Spsb4	45.3886	78.1	40.3222	35.6609	21.8118	19.5334
651.971	0.391973	0.156239	-2.50881	0.012114	0.159831	ENSMUSG00000015714.11	Cers2	578.705	561.961	549.389	686.096	706.158	829.517
217.592	-0.605816	0.241639	2.50712	0.0121721	0.160428	ENSMUSG00000038803.7	Ost4	276.587	212.755	302.416	224.011	160.862	128.92
663.521	0.394282	0.157414	-2.50474	0.0122542	0.161341	ENSMUSG00000041926.15	Rnpep	617.001	544.904	560.73	783.535	804.312	670.646
196.487	0.665556	0.265849	-2.50351	0.0122968	0.161731	ENSMUSG00000052748.14	Swt1	146.095	167.87	139.868	149.675	316.272	259.143
21.1812	1.30419	0.521263	-2.50197	0.0123503	0.162265	ENSMUSG00000053411.16	Cbx7	14.1839	8.97701	13.8607	30.6382	28.1736	31.2534
2893.54	0.4066	0.162686	-2.49929	0.0124441	0.162643	ENSMUSG00000030738.11	Eif3c	2337.51	2500.99	2627.24	3049.26	4063.36	2782.85
1184.52	-0.482064	0.192822	2.50005	0.0124177	0.162643	ENSMUSG00000028639.14	Ybx1	1558.82	1282.81	1305.43	1307.4	857.024	795.659
385.387	-0.438064	0.175206	2.50029	0.0124093	0.162643	ENSMUSG00000029036.18	Atad3a	473.744	447.055	412.042	365.147	322.633	291.698
145.238	-0.563172	0.225328	2.49935	0.0124423	0.162643	ENSMUSG00000004285.12	Atp6v1f	185.81	155.302	178.93	120.042	106.333	125.014
58.9209	0.844516	0.337864	-2.49957	0.0124344	0.162643	ENSMUSG00000040703.11	Cyp2s1	38.2966	43.0896	44.1024	55.7515	86.3385	85.9468
1397.01	0.357037	0.14293	-2.49798	0.0124903	0.163077	ENSMUSG00000051159.16	Cited1	1188.61	1206.51	1277.71	1451.55	1511.38	1746.28
211.068	0.625397	0.250425	-2.49734	0.012513	0.163203	ENSMUSG00000015766.14	Eps8	160.279	162.484	173.889	169.264	333.539	266.956
17.1347	1.55356	0.622367	-2.49621	0.0125529	0.163553	ENSMUSG00000025348.9	Itga7	7.09197	6.2839	12.6007	19.5884	18.1765	39.0667
27.5064	1.24886	0.500451	-2.49547	0.0125791	0.163725	ENSMUSG00000026343.6	Gpr39	12.7655	15.2609	20.1611	24.1088	35.4442	57.2979
291.733	0.505806	0.202776	-2.4944	0.0126169	0.164046	ENSMUSG00000036617.17	Etl4	226.943	270.208	223.032	280.265	346.263	403.69
132.779	0.586984	0.235471	-2.4928	0.0126739	0.164616	ENSMUSG00000025647.16	Shisa5	99.2876	104.133	114.666	163.739	139.05	175.8
32.2049	-1.11268	0.446541	2.49178	0.0127104	0.164748	ENSMUSG00000041731.13	Pgm5	41.1334	52.9643	39.0621	25.1133	24.5383	10.4178
312.756	0.468956	0.188196	-2.49185	0.012708	0.164748	ENSMUSG00000020225.10	Tmbim4	287.934	230.709	268.394	318.939	379.89	390.667
45.5398	-0.964418	0.387386	2.48955	0.0127904	0.165614	ENSMUSG00000022997.9	Wnt1	65.2461	66.4298	50.4027	43.6972	22.7207	24.7423
121.161	-0.77754	0.312426	2.48872	0.0128205	0.165832	ENSMUSG00000024663.20	Rab3il1	168.789	144.53	148.688	111.503	111.786	41.6712
99.6685	-0.647223	0.260171	2.48768	0.0128578	0.165971	ENSMUSG00000038871.5	Bpgm	129.074	106.826	128.527	72.3263	72.7061	88.5513
9.78061	2.1787	0.875773	-2.48775	0.0128554	0.165971	ENSMUSG00000021098.14	4930447C04Rik	5.67358	3.5908	1.26007	6.02719	19.9942	22.1378
124.441	-0.650949	0.261734	2.48707	0.0128802	0.166089	ENSMUSG00000024053.11	Emilin2	126.237	169.665	161.289	121.046	77.2503	91.1557
134.164	0.812354	0.326805	-2.48575	0.012928	0.166534	ENSMUSG00000002428.12	Hltf	80.8485	123.883	85.6846	99.951	263.56	151.058
699.567	0.389895	0.156877	-2.48536	0.012942	0.166543	ENSMUSG00000027782.10	Kpna4	595.726	587.096	633.814	727.281	894.285	759.197
30.9236	-1.05071	0.422888	2.48461	0.0129694	0.166725	ENSMUSG00000042099.16	Kank3	38.2966	46.6804	40.3222	20.5929	22.7207	16.9289
44.7951	-1.04194	0.419661	2.48281	0.013035	0.167053	ENSMUSG00000034674.18	Tdg	63.8277	60.1459	59.2232	46.7108	24.5383	14.3245
197.027	-0.532781	0.214548	2.48327	0.0130183	0.167053	ENSMUSG00000019738.15	Polr2i	232.617	262.129	205.391	186.341	147.23	148.454
203.303	0.56006	0.225566	-2.48291	0.0130315	0.167053	ENSMUSG00000021112.9	Mpp5	143.258	158.893	190.27	204.925	297.186	225.285
607.476	-0.462241	0.186272	2.48154	0.0130816	0.167174	ENSMUSG00000068699.12	Flnc	689.34	777.409	647.675	566.054	578.923	385.459
19.5437	-1.48445	0.598162	2.48168	0.0130764	0.167174	ENSMUSG00000042854.9	Trp53rkb	18.4391	43.0896	25.2014	15.5703	4.54413	10.4178
115.646	-0.877487	0.353617	2.48146	0.0130845	0.167174	ENSMUSG00000052957.8	Gas1	153.187	147.223	152.468	140.132	61.8002	39.0667
1795.48	-0.428798	0.173136	2.47665	0.0132622	0.168582	ENSMUSG00000078851.4	H2aw	2209.86	1874.4	2101.79	1930.71	1309.62	1346.5
155.552	-0.583677	0.235727	2.47607	0.0132839	0.168582	ENSMUSG00000031661.12	Nkd1	212.759	186.722	160.029	130.589	99.9709	143.245
191.345	0.643733	0.259821	-2.4776	0.0132271	0.168582	ENSMUSG00000032047.5	Acat1	182.973	119.394	146.168	168.761	308.092	222.68
2024.66	0.447427	0.180675	-2.47643	0.0132705	0.168582	ENSMUSG00000020075.8	Ddx21	1704.91	1775.65	1658.25	1909.62	3065.47	2034.08
67.4735	0.799627	0.322852	-2.47676	0.013258	0.168582	ENSMUSG00000021678.9	F2rl1	48.2254	36.8057	63.0034	72.8286	95.4268	88.5513
508.581	-0.510619	0.206286	2.47529	0.0133127	0.168582	ENSMUSG00000019428.16	Fkbp8	599.981	603.255	593.492	565.049	328.995	360.716
131.021	-0.77426	0.312806	2.47521	0.0133158	0.168582	ENSMUSG00000040824.3	Snrpd2	174.462	166.972	157.508	152.187	58.1649	76.8313
276.087	-0.485869	0.19607	2.47804	0.0132105	0.168582	ENSMUSG00000040236.4	Trappc5	340.415	298.037	328.878	253.644	188.127	247.423
253.246	-0.477123	0.192729	2.47561	0.013301	0.168582	ENSMUSG00000005417.17	Mprip	306.373	272.003	307.457	234.558	188.127	210.96
1107.06	0.433283	0.175126	-2.47412	0.0133564	0.168891	ENSMUSG00000024974.10	Smc3	886.496	1019.79	917.329	1012.57	1549.55	1256.65
6.52217	-2.41226	0.975109	2.47383	0.0133672	0.168891	ENSMUSG00000043857.16	Mgat5b	9.92876	9.87471	12.6007	1.00453	1.81765	3.90667
11.7076	-1.77305	0.717082	2.47259	0.0134136	0.169307	ENSMUSG00000028644.17	Ermap	14.1839	17.954	21.4212	2.51133	6.36179	7.81335
222.825	0.565509	0.22893	-2.47023	0.0135027	0.169406	ENSMUSG00000034574.10	Daam1	178.718	178.642	180.19	192.368	324.451	282.583
25.061	1.21866	0.493204	-2.47092	0.0134767	0.169406	ENSMUSG00000046836.13	Brox	17.0207	15.2609	12.6007	24.611	41.806	39.0667
197.744	0.698199	0.282532	-2.47122	0.0134652	0.169406	ENSMUSG00000022824.12	Muc13	191.483	111.315	149.948	154.698	328.995	250.027
34.1762	3.04838	1.23342	-2.47149	0.013455	0.169406	ENSMUSG00000009248.6	Ascl2	15.6023	5.3862	1.26007	31.1405	13.6324	138.036
86.0958	-0.900046	0.364298	2.47063	0.0134875	0.169406	ENSMUSG00000028946.7	Hes3	123.4	123.883	91.9849	95.4306	54.5296	27.3467
741.873	-0.462834	0.187349	2.47044	0.0134947	0.169406	ENSMUSG00000009079.16	Ewsr1	936.14	855.509	792.583	788.056	588.011	490.939
96.3047	0.780489	0.316178	-2.46851	0.0135675	0.170049	ENSMUSG00000021432.15	Slc35b3	59.5726	75.4069	76.8641	85.8875	177.221	102.876
12.5988	-1.69054	0.685015	2.46789	0.0135914	0.170178	ENSMUSG00000073295.4	Nudt11	19.8575	19.7494	18.901	9.54306	3.63531	3.90667
111.433	-0.660282	0.267706	2.46644	0.0136462	0.170694	ENSMUSG00000025499.18	Hras	131.911	132.86	146.168	108.489	64.5267	84.6446
309.928	-0.588499	0.238737	2.46505	0.0136995	0.171184	ENSMUSG00000029163.9	Emilin1	371.619	368.955	380.54	352.591	212.665	173.196
649.14	-0.455877	0.184962	2.4647	0.0137127	0.171184	ENSMUSG00000020211.15	Sf3a2	811.321	697.513	748.48	687.1	499.855	450.57
7.4698	3.27411	1.3286	-2.46433	0.0137271	0.171192	ENSMUSG00000057400.14	Ces1c	1.41839	2.6931	0	36.1632	4.54413	0
64.3113	1.02524	0.416276	-2.46289	0.0137824	0.171601	ENSMUSG00000029229.8	Chic2	19.8575	47.5781	57.9631	53.2402	71.7973	135.431
130.273	-0.598928	0.243194	2.46276	0.0137873	0.171601	ENSMUSG00000006288.8	Ttc5	165.952	148.121	158.769	125.064	89.9738	93.7602
61.5305	-0.925005	0.375669	2.46229	0.0138055	0.171657	ENSMUSG00000014303.13	Glis2	52.4806	90.6678	98.2853	50.7289	23.6295	53.3912
733.065	0.426791	0.173405	-2.46124	0.0138457	0.171987	ENSMUSG00000027770.5	Dhx36	573.031	648.14	652.715	685.593	983.351	855.562
35.0266	-1.24728	0.507068	2.45979	0.0139019	0.172291	ENSMUSG00000032332.17	Col12a1	39.715	53.862	55.443	23.6065	33.6266	3.90667
180.089	0.522276	0.212331	-2.45973	0.0139042	0.172291	ENSMUSG00000032123.5	Dpagt1	139.003	149.916	153.728	211.454	188.127	238.307
780.729	0.435766	0.177174	-2.45954	0.0139115	0.172291	ENSMUSG00000025995.16	Wdr75	646.788	680.457	661.536	700.661	1065.14	929.789
219.558	0.502734	0.204447	-2.459	0.0139324	0.17238	ENSMUSG00000023030.16	Slc11a2	182.973	184.029	177.67	230.038	301.73	240.912
168.376	0.679568	0.27643	-2.45838	0.0139566	0.172509	ENSMUSG00000025898.6	Cwf19l2	124.819	122.087	139.868	123.557	259.016	240.912
53.9352	-0.886276	0.360605	2.45775	0.0139812	0.172641	ENSMUSG00000055707.13	Klhl26	58.1542	66.4298	86.9447	51.2311	30.9001	29.9512
40.5167	2.42957	0.989208	-2.45607	0.0140466	0.173093	ENSMUSG00000020325.10	Fstl3	22.6943	11.6701	3.7802	62.281	16.3589	126.316
98.8095	0.706902	0.287928	-2.45513	0.0140833	0.173093	ENSMUSG00000046079.16	Lrrc8d	75.1749	88.8724	59.2232	94.9283	123.6	151.058
125.112	-0.842962	0.343264	2.45572	0.0140601	0.173093	ENSMUSG00000023020.3	Cox14	174.462	122.985	187.75	148.169	50.8943	66.4135
72.8194	0.755221	0.307621	-2.45504	0.0140868	0.173093	ENSMUSG00000014905.4	Dnajb9	56.7358	59.2482	45.3624	76.8467	85.4297	113.294
96.1729	-2.4177	0.984759	2.45512	0.0140837	0.173093	ENSMUSG00000046364.14	Rpl27a	154.605	188.517	143.648	65.7969	3.63531	20.8356
78.3942	-0.738287	0.300815	2.45428	0.0141165	0.173191	ENSMUSG00000010066.15	Cacna2d2	100.706	87.9747	107.106	74.8377	46.3502	53.3912
723.913	0.407741	0.166192	-2.45343	0.0141502	0.173191	ENSMUSG00000014959.12	Gorasp2	635.441	674.173	554.43	763.947	757.053	958.438
1343.13	0.384866	0.156857	-2.45361	0.0141432	0.173191	ENSMUSG00000063358.17	Mapk1	1222.66	1096.09	1174.38	1267.22	1588.63	1709.82
253.794	-0.623123	0.253926	2.45396	0.0141293	0.173191	ENSMUSG00000074637.7	Sox2	330.486	297.139	299.896	292.319	163.589	139.338
1690	0.342422	0.139689	-2.45132	0.0142334	0.173724	ENSMUSG00000027828.12	Ssr3	1546.05	1349.24	1576.34	1776.01	1958.52	1933.8
753.915	0.440944	0.179884	-2.45127	0.0142354	0.173724	ENSMUSG00000020088.10	Sar1a	646.788	573.631	696.817	677.557	962.447	966.251
423.737	0.47175	0.192449	-2.4513	0.0142342	0.173724	ENSMUSG00000031578.5	Mak16	340.415	368.955	352.819	378.709	529.846	571.677
396.551	0.503832	0.205665	-2.44978	0.0142944	0.174275	ENSMUSG00000034311.3	Kif4	347.507	307.014	328.878	354.6	590.737	450.57
1980.52	0.415338	0.169619	-2.44865	0.0143393	0.174483	ENSMUSG00000026553.17	Copa	1509.17	1826.82	1754.01	1887.52	2785.55	2120.02
306.589	0.600626	0.245258	-2.44895	0.0143272	0.174483	ENSMUSG00000021392.8	Nol8	221.269	244.175	263.354	227.527	462.593	420.619
29.616	-1.066	0.435481	2.44788	0.0143699	0.174516	ENSMUSG00000093674.7	Rpl41	36.8782	35.908	47.8826	19.5884	21.8118	15.6267
394.65	0.465071	0.189974	-2.44808	0.014362	0.174516	ENSMUSG00000026977.17	Marchf7	320.557	312.4	360.379	366.654	523.484	484.428
138.68	0.771474	0.315295	-2.44683	0.0144117	0.174854	ENSMUSG00000049799.13	Lrrc19	121.982	74.5092	110.886	98.9464	240.839	184.916
1131.62	-0.480398	0.196508	2.44468	0.0144981	0.175392	ENSMUSG00000069267.2	H3c2	1416.98	1406.7	1131.54	1109.51	659.808	1065.22
273.131	0.522512	0.213722	-2.44482	0.0144925	0.175392	ENSMUSG00000028744.15	Pqlc2	287.934	177.745	209.171	311.405	351.716	300.814
203.93	0.575261	0.235272	-2.44509	0.0144817	0.175392	ENSMUSG00000042644.9	Itpr3	173.044	172.359	144.908	185.838	311.728	235.703
11.865	1.72541	0.70617	-2.44334	0.0145522	0.175876	ENSMUSG00000022488.9	Nckap1l	7.09197	4.4885	5.04027	16.0725	16.3589	22.1378
164.9	0.647152	0.264992	-2.44216	0.0145998	0.176282	ENSMUSG00000031939.16	Taf1d	103.543	127.473	152.468	136.616	224.48	244.818
202.38	0.566122	0.23185	-2.44176	0.014616	0.176298	ENSMUSG00000007812.16	Zfp655	164.534	167.87	154.988	175.291	269.013	282.583
755.005	-0.494763	0.202653	2.44143	0.0146293	0.176298	ENSMUSG00000034675.17	Dbn1	856.71	1026.07	769.901	830.246	526.211	520.89
43.1187	0.943597	0.386597	-2.44078	0.0146557	0.176447	ENSMUSG00000020424.3	Castor1	25.5311	33.2149	28.9816	56.2538	41.806	72.9246
781.066	0.386903	0.158589	-2.43966	0.0147013	0.176655	ENSMUSG00000030268.17	Bcat1	642.533	749.58	638.854	989.464	814.309	851.655
238.084	-0.563352	0.230903	2.43977	0.0146965	0.176655	ENSMUSG00000039081.10	Zfp503	278.005	293.548	283.515	259.672	153.592	160.174
95.2521	-0.680512	0.279003	2.43908	0.0147246	0.176766	ENSMUSG00000042831.13	Alkbh6	112.053	109.519	132.307	92.417	62.709	62.5068
69.2071	-0.828368	0.339686	2.43863	0.014743	0.176817	ENSMUSG00000030335.6	Mrpl51	85.1036	83.4862	99.5453	71.3218	44.5325	31.2534
361.597	0.424167	0.174046	-2.4371	0.0148055	0.177397	ENSMUSG00000036391.16	Sec24a	290.771	315.093	318.797	372.681	430.784	441.454
626.506	0.431716	0.177234	-2.43585	0.014857	0.177844	ENSMUSG00000037857.16	Nufip2	514.877	566.449	516.628	580.117	845.209	735.757
1693.45	0.339962	0.139673	-2.43398	0.0149339	0.178593	ENSMUSG00000014867.9	Surf4	1624.06	1336.68	1525.94	1915.64	1855.82	1902.55
255.995	0.460839	0.189413	-2.43299	0.0149748	0.178911	ENSMUSG00000038168.5	P3h2	236.872	216.346	192.79	284.785	292.642	312.534
678.165	0.470071	0.19325	-2.43245	0.0149969	0.179005	ENSMUSG00000020687.13	Cdc27	575.868	604.153	522.928	571.579	911.553	882.909
882.214	-0.406049	0.167013	2.43125	0.015047	0.179091	ENSMUSG00000029649.10	Pomp	1051.03	960.54	1006.79	868.92	611.64	794.357
137.434	2.26727	0.932498	-2.43139	0.0150409	0.179091	ENSMUSG00000038580.13	Sct	49.6438	46.6804	45.3624	161.227	37.2619	484.428
1831.69	0.426438	0.175393	-2.43133	0.0150436	0.179091	ENSMUSG00000030934.9	Oat	1812.71	1301.67	1575.08	1715.24	2460.19	2125.23
749.306	0.442601	0.182078	-2.43083	0.0150643	0.179126	ENSMUSG00000022108.8	Itm2b	642.533	564.654	696.817	673.539	914.28	1004.02
485.385	0.442794	0.182266	-2.42938	0.0151245	0.179331	ENSMUSG00000030528.12	Blm	412.753	417.431	401.962	442.999	631.635	605.535
233.621	0.531916	0.218902	-2.42992	0.015102	0.179331	ENSMUSG00000058793.14	Cds2	157.442	242.379	171.369	267.206	308.092	255.236
190.889	0.672012	0.27659	-2.42964	0.015114	0.179331	ENSMUSG00000040111.17	Gramd1b	141.839	145.427	152.468	133.101	289.916	282.583
304.559	-0.469286	0.193277	2.42804	0.0151805	0.179825	ENSMUSG00000030612.6	Mrpl46	405.661	323.172	335.178	293.826	239.021	230.494
179.879	0.602351	0.248197	-2.42691	0.0152281	0.179878	ENSMUSG00000050732.9	Vamp8	141.839	144.53	139.868	155.703	210.848	286.489
225.616	0.551041	0.227054	-2.42692	0.0152277	0.179878	ENSMUSG00000046312.4	Myorg	191.483	148.121	211.691	269.717	321.725	210.96
60.9911	0.795064	0.32757	-2.42716	0.0152177	0.179878	ENSMUSG00000021930.14	Spryd7	46.807	42.1919	44.1024	64.2901	70.8885	97.6669
1089.59	0.451384	0.186045	-2.42621	0.0152573	0.180054	ENSMUSG00000026491.13	Ahctf1	910.609	995.55	853.066	955.813	1584.08	1238.42
345.834	-0.559203	0.230532	2.4257	0.0152788	0.180137	ENSMUSG00000026520.8	Pycr2	407.079	386.011	447.324	392.27	232.66	209.658
416.28	-0.535953	0.221209	2.42284	0.0153998	0.181223	ENSMUSG00000030678.7	Maz	452.468	482.963	546.869	467.108	291.733	256.538
18.992	-1.58746	0.655176	2.42295	0.0153951	0.181223	ENSMUSG00000074211.4	Sdhaf1	36.8782	25.1356	25.2014	19.5884	4.54413	2.60445
686.144	-0.483126	0.199454	2.42225	0.0154249	0.181347	ENSMUSG00000025290.17	Rps24	727.636	769.329	907.249	749.381	515.305	447.965
7.41066	-2.23849	0.924813	2.42048	0.0155002	0.182062	ENSMUSG00000020660.6	Pomc	4.25518	13.4655	18.901	2.51133	2.72648	2.60445
23.2769	1.2625	0.521799	-2.41951	0.0155412	0.182204	ENSMUSG00000031103.12	Elf4	17.0207	12.5678	11.3406	29.1314	22.7207	46.8801
366.426	-0.517917	0.214081	2.41926	0.015552	0.182204	ENSMUSG00000039016.5	Timm8b	455.304	351.001	488.906	333.505	220.845	348.996
389.094	-0.423892	0.175222	2.41917	0.015556	0.182204	ENSMUSG00000024913.16	Lrp5	408.497	459.623	471.265	369.668	329.904	295.605
412.55	0.474019	0.196079	-2.41749	0.0156281	0.182878	ENSMUSG00000023977.15	Ubr2	307.792	390.5	335.178	385.238	573.47	483.125
367.664	-0.484732	0.200636	2.41597	0.0156933	0.183469	ENSMUSG00000024968.14	Rcor2	407.079	499.122	381.8	374.691	258.107	285.187
122.918	-0.657483	0.272343	2.41417	0.0157711	0.183947	ENSMUSG00000021702.7	Thbs4	124.819	175.949	152.468	122.553	92.7003	69.0179
167.363	-0.544262	0.225413	2.41451	0.0157563	0.183947	ENSMUSG00000030122.12	Ptms	198.575	227.118	168.849	139.128	118.147	152.36
180.643	-0.515165	0.213407	2.41401	0.0157782	0.183947	ENSMUSG00000031974.8	Abcb10	222.688	202.88	214.212	162.232	158.136	123.711
270.594	0.469926	0.194854	-2.41169	0.0158789	0.184821	ENSMUSG00000006315.9	Tmem147	201.412	222.63	255.794	314.419	279.01	350.299
246.631	-0.466081	0.193266	2.4116	0.0158827	0.184821	ENSMUSG00000078453.3	Abracl	289.352	249.561	320.057	202.916	210.848	207.054
14.1577	-1.59083	0.659846	2.41092	0.0159125	0.184995	ENSMUSG00000040537.17	Adam22	31.2047	15.2609	17.6409	6.02719	10.9059	3.90667
53.2268	0.870082	0.361037	-2.40995	0.0159546	0.185313	ENSMUSG00000042246.5	Tmc7	26.9495	43.9873	41.5822	65.2946	88.1562	53.3912
1740.34	-0.332188	0.137871	2.40941	0.0159784	0.185417	ENSMUSG00000028691.12	Prdx1	2039.65	1757.7	2023.67	1582.14	1472.3	1566.58
80.008	0.703749	0.292153	-2.40884	0.0160035	0.185537	ENSMUSG00000026104.14	Stat1	66.6645	53.862	61.7433	80.3626	105.424	111.991
781.383	0.371753	0.154428	-2.40728	0.0160717	0.186105	ENSMUSG00000029103.16	Lrpap1	706.36	601.459	737.14	838.784	933.365	871.188
23.5773	-1.3189	0.547933	2.40704	0.0160822	0.186105	ENSMUSG00000037972.7	Snn	32.6231	33.2149	36.542	23.6065	6.36179	9.11557
348.27	-0.415672	0.172874	2.40448	0.0161953	0.187241	ENSMUSG00000046756.10	Mrps7	402.824	397.681	395.661	327.98	288.098	277.374
15.9127	1.85786	0.773301	-2.4025	0.0162835	0.188086	ENSMUSG00000009092.5	Derl3	8.51036	4.4885	7.56041	16.0725	5.45296	53.3912
35.2744	0.977678	0.407128	-2.4014	0.0163323	0.188477	ENSMUSG00000033910.13	Gucy1a1	25.5311	25.1356	20.1611	40.6836	45.4413	54.6934
907.322	0.481202	0.200459	-2.40049	0.0163729	0.188771	ENSMUSG00000006304.14	Arpc2	704.942	755.864	807.703	756.915	1034.24	1384.27
1087.81	0.447341	0.186384	-2.40011	0.0163903	0.188798	ENSMUSG00000020149.17	Rab1a	1029.75	823.191	907.249	926.681	1441.4	1398.59
221.745	-0.552883	0.230425	2.3994	0.0164219	0.18891	ENSMUSG00000000567.5	Sox9	209.922	348.308	231.852	194.879	164.498	181.009
39.0797	-0.971313	0.404903	2.39888	0.0164453	0.18891	ENSMUSG00000058709.11	Egln2	56.7358	48.4758	51.6628	37.1677	20.903	19.5334
421.817	0.539285	0.224777	-2.3992	0.0164311	0.18891	ENSMUSG00000015839.6	Nfe2l2	407.079	305.218	318.797	344.555	634.361	520.89
202.44	0.589699	0.245914	-2.39799	0.0164854	0.189197	ENSMUSG00000029617.10	Ccz1	144.676	168.768	168.849	165.246	266.286	300.814
211.103	0.593681	0.247734	-2.39645	0.0165549	0.18982	ENSMUSG00000022951.16	Rcan1	158.86	152.609	191.53	170.77	279.01	313.836
243.812	0.505571	0.21101	-2.39596	0.0165771	0.189901	ENSMUSG00000041817.14	Fam169a	190.065	204.676	207.911	223.508	328.086	308.627
248.371	-0.624515	0.260776	2.39483	0.016628	0.189914	ENSMUSG00000056209.7	Npm3	320.557	244.175	342.738	280.265	134.506	167.987
15.286	-1.5042	0.628057	2.39501	0.0166198	0.189914	ENSMUSG00000029697.6	Fezf1	11.3472	25.1356	31.5017	9.04079	8.17944	6.51112
3357.16	-0.318991	0.133213	2.39459	0.0166389	0.189914	ENSMUSG00000061615.2	H2ac4	4022.57	3522.58	3635.3	2979.44	2808.27	3174.82
503.032	-0.437456	0.182659	2.39493	0.0166236	0.189914	ENSMUSG00000024181.9	Mrpl28	622.675	522.462	594.752	516.832	370.801	390.667
220.31	0.596697	0.249309	-2.3934	0.0166929	0.190184	ENSMUSG00000028114.16	Mettl14	129.074	186.722	207.911	188.852	307.183	302.116
351.651	-0.544411	0.227442	2.39363	0.0166827	0.190184	ENSMUSG00000002416.13	Ndufb2	459.56	447.953	346.519	378.709	206.304	270.863
198.45	0.551585	0.230497	-2.39302	0.0167102	0.190208	ENSMUSG00000029195.10	Klb	156.023	168.768	156.248	175.291	281.736	252.632
286.936	0.551428	0.230528	-2.39202	0.016756	0.190383	ENSMUSG00000024800.8	Rpp30	248.219	239.686	207.911	232.047	374.437	419.316
99.4434	-0.647244	0.27055	2.39233	0.0167418	0.190383	ENSMUSG00000038893.12	Fam117a	127.655	114.008	124.747	95.4306	73.615	61.2046
212.391	0.497045	0.207856	-2.39129	0.0167893	0.190588	ENSMUSG00000021969.8	Zdhhc20	177.299	180.438	168.849	210.952	249.019	287.792
408.846	0.474762	0.198586	-2.39071	0.0168157	0.190715	ENSMUSG00000028907.7	Utp11	377.293	335.74	311.237	376.7	463.502	588.606
345.838	0.457975	0.191637	-2.38981	0.0168572	0.191013	ENSMUSG00000031660.13	Brd7	282.26	263.026	327.618	334.007	416.243	451.872
29.789	1.13962	0.47704	-2.38895	0.0168967	0.191114	ENSMUSG00000021983.16	Atp8a2	25.5311	15.2609	15.1208	26.6201	54.5296	41.6712
34.4563	1.23889	0.518573	-2.38904	0.0168925	0.191114	ENSMUSG00000029811.14	Aoc1	9.92876	28.7264	21.4212	35.6609	26.356	84.6446
403.951	0.484476	0.202984	-2.38677	0.0169973	0.192079	ENSMUSG00000022180.7	Slc7a8	343.251	324.07	341.478	349.075	576.196	489.637
559.765	-0.383778	0.160874	2.38557	0.0170525	0.192489	ENSMUSG00000053931.11	Cnn3	672.319	629.288	602.312	522.357	502.581	429.734
21.2469	-1.24275	0.521	2.38532	0.0170644	0.192489	ENSMUSG00000073096.11	Lrrc61	19.8575	35.908	34.0218	15.068	10.9059	11.72
44.9263	-1.12464	0.471684	2.3843	0.0171117	0.192849	ENSMUSG00000055235.11	Wdr86	69.5013	64.6344	52.9228	53.2402	13.6324	15.6267
215.331	0.550269	0.230926	-2.38289	0.0171775	0.193365	ENSMUSG00000026466.16	Tor1aip1	174.462	150.814	197.831	190.359	279.01	299.512
53.42	0.877844	0.368431	-2.38265	0.0171883	0.193365	ENSMUSG00000029260.15	Ugt2b34	34.0415	31.4195	47.8826	59.2674	94.518	53.3912
5.90149	-2.47794	1.04093	2.3805	0.0172893	0.193805	ENSMUSG00000027967.8	Neurog2	11.3472	11.6701	7.56041	3.0136	1.81765	0
718.023	0.413032	0.173448	-2.38131	0.0172512	0.193805	ENSMUSG00000027639.16	Samhd1	609.909	617.618	618.693	667.009	979.715	815.193
395.62	-0.455927	0.191526	2.3805	0.0172891	0.193805	ENSMUSG00000030796.17	Tead2	415.589	491.042	468.745	409.849	298.095	290.396
26.7191	-1.09367	0.459339	2.38096	0.0172675	0.193805	ENSMUSG00000039257.11	Vstm2b	43.9702	33.2149	32.7618	20.5929	15.4501	14.3245
1762.63	0.348174	0.146402	-2.3782	0.0173973	0.19484	ENSMUSG00000028426.10	Rad23b	1675.12	1543.15	1432.7	1790.58	1923.08	2211.18
162.406	-0.544044	0.228922	2.37654	0.0174758	0.195545	ENSMUSG00000020801.8	Med31	221.269	172.359	183.97	130.087	111.786	154.965
195.085	-0.554892	0.233611	2.37528	0.0175354	0.195973	ENSMUSG00000036529.17	Sbf1	239.709	231.607	228.072	207.938	129.053	134.129
3563.12	-0.319672	0.134595	2.37508	0.0175454	0.195973	ENSMUSG00000060678.5	H4c3	4158.73	3616.84	4095.22	3340.57	2939.15	3228.22
36.5817	-0.991974	0.41777	2.37445	0.017575	0.196103	ENSMUSG00000026227.11	2810459M11Rik	65.2461	43.0896	39.0621	31.1405	22.7207	18.2311
402.584	0.470745	0.198277	-2.37417	0.0175884	0.196103	ENSMUSG00000000385.8	Tmprss2	402.824	277.389	332.658	386.243	518.94	497.45
45.8311	0.90755	0.382404	-2.37328	0.017631	0.196147	ENSMUSG00000060519.11	Tor3a	43.9702	30.5218	21.4212	62.281	49.0766	67.7157
437.526	-0.430051	0.181219	2.3731	0.0176393	0.196147	ENSMUSG00000020897.12	Aurkb	550.337	475.781	483.866	441.994	328.086	345.09
1720.65	0.408659	0.172157	-2.37376	0.017608	0.196147	ENSMUSG00000031696.9	Vps35	1499.24	1369.89	1565	1506.8	2320.23	2062.72
340.99	0.41848	0.176533	-2.37055	0.0177616	0.196981	ENSMUSG00000041957.15	Pkp2	272.332	295.344	306.196	360.627	381.707	429.734
436.885	0.413816	0.174527	-2.37107	0.0177366	0.196981	ENSMUSG00000026235.14	Epha4	320.557	418.328	384.321	515.325	524.393	458.383
301.011	-0.68396	0.288563	2.37023	0.0177772	0.196981	ENSMUSG00000024925.11	Rnaseh2c	419.845	353.694	343.998	379.211	160.862	148.454
1534.77	-0.36737	0.154959	2.37077	0.0177513	0.196981	ENSMUSG00000028936.15	Rpl22	1764.48	1640.1	1786.78	1584.65	1194.2	1238.42
5.95685	3.03204	1.27974	-2.36927	0.0178235	0.197319	ENSMUSG00000002384.2	Bmp8b	4.25518	0	0	3.0136	15.4501	13.0222
2483.07	0.396625	0.167436	-2.36882	0.017845	0.197382	ENSMUSG00000034088.15	Hdlbp	2049.58	2195.78	2184.96	2330.51	3534.43	2603.15
627.267	0.44379	0.187385	-2.36833	0.0178684	0.197467	ENSMUSG00000032374.14	Plod2	533.316	547.597	510.327	551.488	737.967	882.909
253.016	-0.536792	0.226833	2.36647	0.0179586	0.198115	ENSMUSG00000073775.4	Kti12	290.771	280.083	330.138	265.699	150.865	200.543
950.084	0.424252	0.179254	-2.36676	0.0179444	0.198115	ENSMUSG00000028433.14	Ubap2	775.862	940.79	715.718	957.822	1332.34	977.971
783.955	0.352201	0.148947	-2.3646	0.0180495	0.19892	ENSMUSG00000068040.10	Tm9sf4	700.687	735.217	628.774	841.296	897.921	899.837
527.858	0.414394	0.175334	-2.36345	0.0181055	0.19892	ENSMUSG00000029455.14	Aldh2	506.367	413.84	441.024	689.109	599.826	516.983
51.2345	-0.81748	0.3459	2.36334	0.0181111	0.19892	ENSMUSG00000024959.14	Bad	65.2461	56.5551	75.6041	43.6972	36.3531	29.9512
28.8924	1.07823	0.456159	-2.36372	0.0180926	0.19892	ENSMUSG00000046598.15	Bdh1	21.2759	17.954	16.3809	39.1768	29.0825	49.4845
169.817	-0.622734	0.263401	2.36421	0.0180687	0.19892	ENSMUSG00000021520.4	Uqcrb	207.086	182.233	230.592	179.309	88.1562	131.525
110.663	-0.73627	0.311592	2.36293	0.018131	0.198964	ENSMUSG00000039476.13	Prrx2	127.655	165.177	123.487	119.539	49.9855	78.1335
150.185	-0.754819	0.319516	2.36238	0.018158	0.198975	ENSMUSG00000047824.13	Pygo2	207.086	182.233	180.19	185.336	77.2503	69.0179
4598.59	-0.451199	0.191003	2.36226	0.0181638	0.198975	ENSMUSG00000051855.15	Mest	5514.72	5142.93	5283.46	5331.56	3259.96	3058.93
63.1123	-0.801205	0.339564	2.35951	0.0182991	0.199496	ENSMUSG00000022760.17	Thap7	72.3381	56.5551	112.146	45.7062	46.3502	45.5779
116.133	-0.639919	0.271257	2.35908	0.0183201	0.199496	ENSMUSG00000004562.16	Arhgef40	137.584	154.405	134.827	118.535	86.3385	65.1112
371.211	0.460954	0.195338	-2.35977	0.0182861	0.199496	ENSMUSG00000053289.8	Ddx10	334.741	331.252	269.654	350.582	503.49	437.548
287.319	0.46507	0.197107	-2.35948	0.0183008	0.199496	ENSMUSG00000033382.15	Trappc8	241.127	250.458	230.592	270.219	370.801	360.716
175.75	0.620664	0.263101	-2.35903	0.0183229	0.199496	ENSMUSG00000049493.13	Pls1	143.258	141.837	129.787	152.187	299.913	187.52
288.133	-0.552654	0.23419	2.35985	0.0182822	0.199496	ENSMUSG00000003344.14	Btbd2	329.067	386.909	315.017	323.459	188.127	186.218
172.161	0.556794	0.235921	-2.36008	0.0182708	0.199496	ENSMUSG00000031756.5	Cenpn	127.655	148.121	139.868	156.205	216.301	244.818
41.6761	-0.913857	0.387585	2.35783	0.0183823	0.19997	ENSMUSG00000028358.15	Zfp618	65.2461	55.6574	42.8423	34.1541	20.903	31.2534
114.013	0.66079	0.280313	-2.35733	0.0184067	0.199982	ENSMUSG00000020303.2	Stc2	76.5933	99.6448	88.2047	162.734	95.4268	161.476
328.026	0.500335	0.212291	-2.35684	0.0184314	0.199982	ENSMUSG00000039967.14	Zfp292	242.545	289.06	280.995	283.278	460.775	411.503
32.3185	-1.38319	0.586806	2.35715	0.0184159	0.199982	ENSMUSG00000048644.8	Ctxn1	46.807	47.5781	47.8826	39.679	5.45296	6.51112
178.092	-0.684023	0.290562	2.35414	0.0185656	0.199984	ENSMUSG00000035278.9	Plekhj1	248.219	200.187	214.212	211.956	105.424	88.5513
41.6725	-0.887197	0.376564	2.35603	0.0184714	0.199984	ENSMUSG00000020253.15	Ppm1m	43.9702	59.2482	57.9631	24.611	29.0825	35.1601
530.418	-0.567187	0.241006	2.35342	0.0186016	0.199984	ENSMUSG00000002980.14	Bcam	660.972	595.176	648.935	636.371	357.169	283.885
693.551	0.433181	0.183851	-2.35615	0.0184654	0.199984	ENSMUSG00000017485.11	Top2b	604.236	587.096	578.371	640.389	1002.44	748.779
234.268	0.583768	0.247973	-2.35416	0.0185649	0.199984	ENSMUSG00000023025.16	Larp4	182.973	228.016	148.688	194.377	329.904	321.65
17.3871	1.35349	0.57461	-2.3555	0.018498	0.199984	ENSMUSG00000058297.16	Spock2	9.92876	7.1816	12.6007	26.1178	26.356	22.1378
110.443	0.587711	0.249564	-2.35495	0.0185252	0.199984	ENSMUSG00000025200.7	Cwf19l1	92.1956	86.1793	86.9447	131.091	149.048	117.2
9.41819	-1.90063	0.80706	2.35501	0.0185224	0.199984	ENSMUSG00000024411.11	Aqp4	15.6023	13.4655	16.3809	7.03173	2.72648	1.30222
142.425	-0.607674	0.258097	2.35444	0.0185507	0.199984	ENSMUSG00000070576.4	Mn1	164.534	174.154	180.19	146.662	110.877	78.1335
474.961	-0.415312	0.17648	2.35331	0.0186072	0.199984	ENSMUSG00000033751.5	Gadd45gip1	608.491	526.053	496.467	466.103	358.078	394.574
80.3838	0.756929	0.321609	-2.35357	0.0185942	0.199984	ENSMUSG00000057228.6	Aadat	75.1749	40.3965	64.2635	75.8422	117.239	109.387
143.182	-0.617331	0.26251	2.35165	0.0186903	0.200476	ENSMUSG00000000325.16	Arvcf	201.412	154.405	167.589	150.68	99.0621	85.9468
8.85162	2.121	0.901853	-2.35183	0.0186815	0.200476	ENSMUSG00000068536.11	Doxl2	4.25518	5.3862	0	9.54306	20.903	13.0222
96.8876	-0.62632	0.266393	2.35112	0.0187171	0.200476	ENSMUSG00000040998.18	Npnt	141.839	112.213	99.5453	78.8558	77.2503	71.6224
488.093	0.428936	0.18243	-2.35124	0.0187111	0.200476	ENSMUSG00000021474.9	Sfxn1	446.794	368.057	433.463	470.623	656.173	553.446
136.564	0.551524	0.234721	-2.3497	0.0187885	0.20065	ENSMUSG00000027822.16	Slc33a1	117.727	117.599	97.0252	157.209	182.674	147.151
133.972	0.573805	0.244177	-2.34995	0.0187758	0.20065	ENSMUSG00000036985.12	Zdhhc9	95.0324	110.417	115.926	130.589	170.859	181.009
766.4	0.429175	0.182646	-2.34976	0.0187857	0.20065	ENSMUSG00000029202.12	Pds5a	597.144	707.388	651.455	670.525	976.989	994.9
1432.27	0.440097	0.187313	-2.34952	0.0187974	0.20065	ENSMUSG00000031095.15	Cul4b	1239.68	1134.69	1270.15	1173.29	1983.97	1791.86
20.9583	3.4345	1.462	-2.34918	0.0188148	0.200664	ENSMUSG00000024912.6	Fosl1	0	1.7954	8.82047	12.5567	12.7236	89.8535
1227.83	-0.348722	0.14852	2.34799	0.0188752	0.201137	ENSMUSG00000022982.10	Sod1	1504.92	1248.7	1373.47	1098.96	980.624	1160.28
211.381	0.571138	0.243323	-2.34724	0.0189131	0.20137	ENSMUSG00000026779.6	Mastl	187.228	151.711	170.109	171.775	294.46	293.001
409.989	-0.463237	0.197711	2.343	0.0191294	0.20281	ENSMUSG00000013236.17	Ptprs	492.183	509.894	424.643	409.849	262.651	360.716
1795.87	0.34807	0.148527	-2.34348	0.0191046	0.20281	ENSMUSG00000030884.12	Uqcrc2	1612.71	1477.62	1649.43	1729.8	2222.08	2083.56
541.127	0.47423	0.20232	-2.34396	0.0190804	0.20281	ENSMUSG00000056999.15	Ide	490.764	473.088	393.141	461.583	767.959	660.228
668.91	-0.492976	0.210387	2.34319	0.0191197	0.20281	ENSMUSG00000006585.3	Cdt1	859.547	730.728	761.081	763.445	478.043	420.619
376.185	0.419943	0.179214	-2.34324	0.0191169	0.20281	ENSMUSG00000028567.8	Txndc12	276.587	333.047	354.079	419.895	400.793	472.708
175.169	-0.510386	0.217922	2.34206	0.0191778	0.203112	ENSMUSG00000023971.9	Rrp36	231.198	210.062	177.67	160.725	137.233	134.129
166.772	0.578109	0.24703	-2.34024	0.0192714	0.203112	ENSMUSG00000019948.4	Actr6	134.747	131.064	133.567	144.653	202.668	253.934
27.2877	-1.25182	0.534732	2.34103	0.0192308	0.203112	ENSMUSG00000033350.7	Chst2	41.1334	33.2149	42.8423	29.6337	9.08827	7.81335
10433	-0.373668	0.15965	2.34055	0.0192552	0.203112	ENSMUSG00000003970.9	Rpl8	12839.3	10582.1	11913.9	11083	8271.23	7908.41
115.876	0.582169	0.248624	-2.34157	0.019203	0.203112	ENSMUSG00000029810.15	Tmem176b	85.1036	88.8724	104.586	148.671	120.874	147.151
120.525	-0.649594	0.27755	2.34045	0.0192603	0.203112	ENSMUSG00000002804.4	Nudt14	181.554	145.427	117.186	122.051	82.7032	74.2268
375.359	0.396627	0.16945	-2.34067	0.019249	0.203112	ENSMUSG00000026047.13	Poglut2	327.649	316.888	328.878	434.962	454.413	389.365
41.6867	0.906636	0.387479	-2.33983	0.0192924	0.203162	ENSMUSG00000059820.14	Nkapd1	25.5311	34.1126	26.4614	42.1904	64.5267	57.2979
819.622	0.430637	0.18408	-2.3394	0.0193145	0.203192	ENSMUSG00000031731.16	Ap1g1	666.645	742.398	682.957	717.236	1148.76	959.74
12.5478	-1.75657	0.751046	2.33884	0.0193439	0.203192	ENSMUSG00000004455.16	Ppp1cc	26.9495	19.7494	12.6007	11.0499	3.63531	1.30222
37.0226	-1.13607	0.485723	2.33892	0.0193397	0.203192	ENSMUSG00000040612.13	Ildr2	38.2966	61.9413	54.1829	36.6654	24.5383	6.51112
87.41	-0.760095	0.325039	2.33847	0.0193627	0.203219	ENSMUSG00000023832.14	Acat2	109.216	105.031	118.446	94.9283	59.0737	37.7645
383.559	-0.445228	0.190463	2.33762	0.0194072	0.203515	ENSMUSG00000062075.13	Lmnb2	439.702	473.088	417.082	391.768	315.363	264.352
103.955	-0.669175	0.286359	2.33684	0.0194474	0.203766	ENSMUSG00000028364.15	Tnc	121.982	145.427	117.186	92.9192	95.4268	50.7868
853.991	0.398699	0.170711	-2.33551	0.0195167	0.204089	ENSMUSG00000032244.9	Fem1b	717.707	733.421	757.301	785.544	1153.3	976.669
219.206	-0.489096	0.209444	2.33521	0.0195326	0.204089	ENSMUSG00000029090.12	Adgra3	232.617	286.366	249.493	209.947	154.501	182.311
138.809	0.527325	0.225764	-2.33573	0.0195051	0.204089	ENSMUSG00000021916.16	Glt8d1	109.216	116.701	114.666	153.693	174.495	164.08
40.7774	-0.9648	0.41319	2.335	0.0195434	0.204089	ENSMUSG00000062376.7	Borcs7	52.4806	43.0896	68.0437	38.6745	25.4471	16.9289
8.41239	-1.91028	0.818233	2.33463	0.0195626	0.204119	ENSMUSG00000047586.4	Nccrp1	14.1839	15.2609	10.0805	3.0136	2.72648	5.2089
369.726	-0.462382	0.198127	2.33377	0.0196077	0.204291	ENSMUSG00000025858.12	Get4	477.999	374.341	437.243	379.713	289.916	259.143
3198.46	0.476876	0.204344	-2.3337	0.0196116	0.204291	ENSMUSG00000021190.14	Lgmn	3086.43	2211.04	2725.53	2490.74	4526.87	4150.19
110.195	-0.651859	0.279378	2.33325	0.0196348	0.204362	ENSMUSG00000006360.11	Crip1	114.89	120.292	167.589	81.3671	66.3443	110.689
159.018	-0.620929	0.266317	2.33154	0.0197246	0.205126	ENSMUSG00000040658.7	Dnph1	207.086	193.006	181.45	177.802	103.606	91.1557
641.777	0.37589	0.161292	-2.3305	0.01978	0.205531	ENSMUSG00000040675.17	Mthfd1l	577.286	600.562	497.727	701.164	800.676	673.25
7.43824	2.26167	0.970926	-2.32939	0.0198382	0.205965	ENSMUSG00000079038.3	D130040H23Rik	0	3.5908	3.7802	13.0589	7.27061	16.9289
893.794	0.372524	0.159957	-2.3289	0.0198644	0.206066	ENSMUSG00000041084.8	Ostc	816.995	740.603	777.462	866.409	999.709	1161.58
331.706	0.504235	0.216721	-2.32666	0.0199834	0.206958	ENSMUSG00000021548.10	Ccnh	285.097	231.607	304.936	286.794	411.698	470.103
24.7342	1.33226	0.572598	-2.3267	0.0199812	0.206958	ENSMUSG00000019278.5	Dpep1	4.25518	12.5678	25.2014	27.6246	52.7119	26.0445
1007.75	-0.574624	0.247118	2.32531	0.0200556	0.207301	ENSMUSG00000066357.6	Wdr6	1120.53	1335.78	1165.56	1166.26	814.309	444.059
58.1093	-0.852152	0.366476	2.32526	0.020058	0.207301	ENSMUSG00000021262.15	Evl	66.6645	67.3275	90.7249	51.7334	22.7207	49.4845
16201.3	-1.07826	0.463745	2.32511	0.0200662	0.207301	ENSMUSG00000052217.6	Hbb-bh1	20670.3	20110.3	25186.2	8456.66	16778.8	6005.86
165.034	-0.625183	0.269122	2.32305	0.0201765	0.207755	ENSMUSG00000018923.13	Med11	207.086	187.619	209.171	186.843	92.7003	106.782
67.0863	0.734425	0.316083	-2.32352	0.0201513	0.207755	ENSMUSG00000026672.11	Optn	63.8277	42.1919	45.3624	71.8241	88.1562	91.1557
78.7256	-0.711942	0.30641	2.3235	0.0201524	0.207755	ENSMUSG00000033948.3	Zswim5	106.38	107.724	80.6443	77.349	48.1678	52.089
377.194	0.390017	0.167872	-2.3233	0.0201631	0.207755	ENSMUSG00000028049.15	Scamp3	327.649	324.968	326.358	425.922	399.884	458.383
832.885	0.33961	0.14622	-2.3226	0.0202006	0.207832	ENSMUSG00000019877.10	Serinc1	744.657	724.444	737.14	894.034	1011.52	885.513
41.5328	-0.882346	0.379955	2.32224	0.0202202	0.207863	ENSMUSG00000031887.13	Tradd	60.9909	53.862	47.8826	36.6654	26.356	23.44
756.039	0.447803	0.192871	-2.32178	0.020245	0.207947	ENSMUSG00000032407.14	U2surp	619.838	661.605	635.074	634.864	1082.41	902.442
1633.14	0.40402	0.174077	-2.32092	0.0202911	0.20825	ENSMUSG00000027423.15	Snx5	1419.81	1373.48	1421.36	1394.29	1993.06	2196.85
235.203	-0.52534	0.226431	2.32009	0.0203362	0.208542	ENSMUSG00000043091.9	Tuba1c	283.679	231.607	320.057	239.581	152.683	183.614
126.823	0.567626	0.244918	-2.31762	0.0204699	0.209741	ENSMUSG00000041779.5	Tram2	83.6852	116.701	105.846	168.259	144.503	141.943
88.7253	0.741198	0.319934	-2.31672	0.020519	0.210072	ENSMUSG00000036503.13	Rnf13	45.3886	64.6344	88.2047	106.48	81.7944	145.849
148.957	-0.543012	0.234554	2.31509	0.0206081	0.210669	ENSMUSG00000028840.10	Zfp593	192.902	156.2	182.71	141.639	101.789	118.502
58.9995	1.91258	0.826155	-2.31504	0.0206109	0.210669	ENSMUSG00000053846.5	Lipg	9.92876	28.7264	35.2819	93.9238	27.2648	158.871
920.104	0.412433	0.17822	-2.31418	0.0206579	0.210976	ENSMUSG00000021374.10	Nup153	738.983	903.087	723.279	850.839	1249.64	1054.8
339.795	0.441961	0.191119	-2.31249	0.0207505	0.211405	ENSMUSG00000039298.16	Cdk5rap2	306.373	315.093	241.933	350.582	447.143	377.645
1231.85	0.442957	0.19154	-2.31261	0.0207441	0.211405	ENSMUSG00000026775.9	Yme1l1	1121.95	1084.42	924.89	1072.84	1834.01	1353.01
263.628	0.504319	0.218053	-2.31283	0.020732	0.211405	ENSMUSG00000005871.15	Apc	224.106	243.277	183.97	237.07	332.631	360.716
61.0914	-0.811576	0.351115	2.31143	0.0208094	0.211751	ENSMUSG00000038412.8	Higd1a	92.1956	69.1229	74.344	55.2493	50.8943	24.7423
128.079	0.552716	0.23914	-2.31126	0.0208182	0.211751	ENSMUSG00000021687.14	Scamp1	100.706	97.8494	112.146	134.105	151.774	171.894
946.057	0.431523	0.186805	-2.31002	0.0208869	0.212276	ENSMUSG00000015733.13	Capza2	839.689	779.204	795.103	790.065	1168.75	1303.53
166.212	-0.594831	0.257596	2.30916	0.0209346	0.212589	ENSMUSG00000040097.16	Flywch1	192.902	197.494	212.951	175.291	132.689	85.9468
1265.63	0.434752	0.188308	-2.30873	0.0209588	0.212662	ENSMUSG00000027680.15	Fxr1	1127.62	1066.47	1033.26	1058.27	1834.01	1474.12
153.918	-0.58048	0.251478	2.30828	0.0209838	0.212743	ENSMUSG00000024790.8	Sac3d1	171.626	151.711	230.592	136.114	95.4268	138.036
50.2404	0.909917	0.394271	-2.30784	0.0210078	0.21278	ENSMUSG00000042460.5	C1galt1	28.3679	35.908	39.0621	43.6972	55.4384	98.9691
55.269	-0.75095	0.325425	2.3076	0.0210214	0.21278	ENSMUSG00000001249.14	Hpn	73.7565	64.6344	70.5638	46.2085	39.9884	36.4623
43.1198	-0.996801	0.432695	2.3037	0.0212393	0.213115	ENSMUSG00000062619.6	2310039H08Rik	58.1542	49.3735	66.7836	47.213	16.3589	20.8356
209.729	-0.558269	0.242316	2.30389	0.0212288	0.213115	ENSMUSG00000046791.8	Riox1	282.26	237.891	233.113	222.504	165.406	117.2
63.4182	0.838702	0.363638	-2.30642	0.0210871	0.213115	ENSMUSG00000026399.12	Cd55	31.2047	59.2482	44.1024	52.7379	98.1533	95.0624
39.7301	-0.876266	0.380094	2.30539	0.0211446	0.213115	ENSMUSG00000063015.12	Ccni	46.807	50.2712	57.9631	33.1496	25.4471	24.7423
20.2939	-1.57848	0.685109	2.30398	0.021224	0.213115	ENSMUSG00000033819.16	Ppp1r16a	28.3679	36.8057	27.7215	21.5974	7.27061	0
278.964	-0.523059	0.227086	2.30335	0.0212591	0.213115	ENSMUSG00000043445.7	Pgp	317.72	307.014	365.42	306.382	175.404	201.845
97.6698	-0.622705	0.270261	2.30409	0.0212174	0.213115	ENSMUSG00000044033.16	Ccdc141	93.614	139.144	120.966	71.8241	74.5238	85.9468
288.865	-0.470066	0.204068	2.30348	0.0212517	0.213115	ENSMUSG00000030816.8	Rnf40	371.619	359.978	277.215	284.785	229.933	209.658
217.577	0.518641	0.225137	-2.30367	0.0212413	0.213115	ENSMUSG00000026664.7	Phyh	205.667	161.586	168.849	196.888	299.004	273.467
73.0084	-0.729684	0.316576	2.30493	0.0211706	0.213115	ENSMUSG00000042380.8	Smim12	86.522	101.44	86.9447	74.3354	44.5325	44.2756
33.6842	-1.01345	0.439511	2.30587	0.0211181	0.213115	ENSMUSG00000041420.18	Meis3	29.7863	59.2482	46.6225	29.1314	19.0854	18.2311
49.6258	-0.884738	0.383894	2.30464	0.0211867	0.213115	ENSMUSG00000023286.16	Ube2j2	62.4093	61.0436	71.8239	50.2266	32.7178	19.5334
365.386	0.474041	0.205831	-2.30305	0.0212758	0.213115	ENSMUSG00000051316.8	Taf7	310.628	315.991	288.555	310.4	486.222	480.521
15.6761	1.84773	0.802815	-2.30156	0.0213599	0.213589	ENSMUSG00000022018.7	Rgcc	7.09197	8.97701	3.7802	10.5476	6.36179	57.2979
197.478	0.555167	0.24124	-2.30131	0.0213742	0.213589	ENSMUSG00000024072.9	Yipf4	170.207	143.632	165.069	165.748	286.28	253.934
521.073	0.416341	0.180907	-2.3014	0.0213688	0.213589	ENSMUSG00000029048.3	Rer1	466.652	380.625	491.426	498.75	635.27	653.717
6.65355	2.81677	1.22425	-2.30082	0.0214016	0.213656	ENSMUSG00000079015.2	Serpina1c	0	4.4885	0	20.5929	1.81765	13.0222
662.297	1.02758	0.44666	-2.30059	0.021415	0.213656	ENSMUSG00000020911.14	Krt19	460.978	460.52	385.581	782.531	481.678	1402.5
35.8491	1.07089	0.465684	-2.29961	0.0214704	0.214038	ENSMUSG00000027695.16	Pld1	19.8575	30.5218	17.6409	25.6156	56.3473	65.1112
306.598	-0.512399	0.222914	2.29864	0.0215254	0.214415	ENSMUSG00000023348.11	Trip6	404.242	353.694	327.618	330.491	239.93	183.614
137.482	0.546653	0.237941	-2.29742	0.0215946	0.214805	ENSMUSG00000030965.19	Abraxas2	106.38	106.826	120.966	135.612	175.404	179.707
461.855	-0.439256	0.191201	2.29735	0.0215989	0.214805	ENSMUSG00000026923.15	Notch1	534.735	555.677	507.807	495.737	339.901	337.276
18.7102	-1.51251	0.658458	2.29704	0.0216162	0.214807	ENSMUSG00000069227.4	Gprin1	12.7655	35.0103	36.542	18.5838	5.45296	3.90667
1860.93	0.321993	0.140257	-2.29573	0.0216912	0.215211	ENSMUSG00000024640.9	Psat1	1636.83	1569.18	1756.53	1925.19	2280.25	1997.61
55.8977	-0.775952	0.337961	2.29598	0.0216769	0.215211	ENSMUSG00000074217.8	Misp3	72.3381	57.4528	83.1645	49.2221	35.4442	37.7645
167.53	0.525445	0.22891	-2.29542	0.021709	0.215217	ENSMUSG00000036188.4	Ankmy2	160.279	143.632	108.366	189.354	219.936	183.614
41.1247	-1.11805	0.487328	2.29424	0.0217765	0.215715	ENSMUSG00000090946.3	Ccdc71l	75.1749	45.7827	50.4027	48.2176	15.4501	11.72
178.807	-1.33572	0.582445	2.29329	0.021831	0.216084	ENSMUSG00000046229.10	Scand1	273.75	200.187	296.116	183.327	69.9797	49.4845
372.042	0.456834	0.199243	-2.29285	0.0218568	0.216168	ENSMUSG00000034485.10	Uaca	283.679	352.796	303.676	398.297	534.39	359.414
116.226	-0.614113	0.26799	2.29155	0.0219315	0.216736	ENSMUSG00000042810.14	Krba1	140.421	159.791	123.487	118.033	82.7032	72.9246
1094.24	0.454877	0.198561	-2.29086	0.0219713	0.216958	ENSMUSG00000027206.13	Cops2	872.312	913.859	980.333	856.364	1493.2	1449.38
262.099	-0.521354	0.227621	2.29044	0.0219956	0.217026	ENSMUSG00000024217.10	Snrpc	304.955	282.776	342.738	287.799	177.221	177.103
46.0013	-0.807445	0.352633	2.28976	0.0220352	0.217247	ENSMUSG00000028780.13	Sema3c	53.899	65.5321	55.443	30.136	34.5354	36.4623
57.3317	-0.799121	0.349129	2.2889	0.0220851	0.217567	ENSMUSG00000031375.17	Bgn	59.5726	80.7931	79.3843	56.7561	33.6266	33.8578
59.6946	0.740986	0.323819	-2.28828	0.0221214	0.217753	ENSMUSG00000033965.10	Slc16a2	35.4599	49.3735	49.1426	83.3762	71.7973	69.0179
134.337	1.49435	0.653539	-2.28654	0.0222225	0.218213	ENSMUSG00000028640.11	Tfap2c	63.8277	63.7367	83.1645	117.53	93.6092	384.156
11.2853	-1.65787	0.725018	2.28666	0.0222155	0.218213	ENSMUSG00000070871.10	Ccnyl1	11.3472	15.2609	25.2014	6.02719	7.27061	2.60445
85.6332	0.683153	0.298805	-2.28628	0.0222378	0.218213	ENSMUSG00000020413.11	Hus1	56.7358	64.6344	74.344	80.8649	101.789	135.431
237.726	0.52909	0.231363	-2.28684	0.0222053	0.218213	ENSMUSG00000033931.9	Rbm34	201.412	167.87	214.212	208.44	354.442	279.978
199.089	-0.568993	0.249071	2.28447	0.0223442	0.218993	ENSMUSG00000001240.13	Ramp2	242.545	195.699	278.475	213.965	124.509	139.338
835.048	0.328746	0.143914	-2.28433	0.0223523	0.218993	ENSMUSG00000002778.14	Kdelr1	763.096	720.854	738.4	981.428	889.741	916.766
77.0621	-0.669216	0.293189	2.28254	0.0224576	0.21977	ENSMUSG00000024248.14	Cox7a2l	103.543	77.2023	104.586	67.3037	56.3473	53.3912
176.84	0.509448	0.223238	-2.28209	0.0224843	0.21977	ENSMUSG00000069114.8	Zbtb10	116.308	162.484	157.508	190.359	229.933	204.449
1365.6	0.339051	0.148553	-2.28236	0.0224683	0.21977	ENSMUSG00000002981.10	Clptm1	1321.94	1087.12	1208.4	1380.73	1555.91	1639.5
799.293	0.353086	0.154814	-2.28071	0.0225655	0.22022	ENSMUSG00000002015.5	Bcap31	771.606	638.265	696.817	828.237	968.809	892.024
135.38	-0.586297	0.257036	2.28099	0.0225488	0.22022	ENSMUSG00000033256.14	Shf	147.513	166.972	175.149	141.639	87.2474	93.7602
183.74	-0.542841	0.238144	2.27947	0.0226392	0.220645	ENSMUSG00000025264.12	Tsr2	191.483	209.164	255.794	189.354	138.142	118.502
501.856	0.373787	0.163986	-2.27938	0.0226442	0.220645	ENSMUSG00000051375.15	Pcdh1	493.601	406.658	413.302	578.108	581.649	537.819
36.2033	-0.91087	0.399783	2.27841	0.022702	0.221036	ENSMUSG00000002289.16	Angptl4	55.3174	36.8057	50.4027	27.6246	23.6295	23.44
33.4888	1.28543	0.564258	-2.27809	0.0227213	0.221051	ENSMUSG00000031179.14	3830417A13Rik	25.5311	16.1586	16.3809	33.6518	15.4501	93.7602
671.04	-0.398682	0.175139	2.27637	0.022824	0.221878	ENSMUSG00000025260.10	Hsd17b10	727.636	703.797	860.626	680.068	488.949	565.166
490.884	0.50956	0.224088	-2.27393	0.0229705	0.223129	ENSMUSG00000020078.16	Vps26a	441.121	376.137	396.921	382.225	761.597	587.303
61.9163	-0.752803	0.331124	2.27348	0.0229975	0.223219	ENSMUSG00000040666.19	Sh3bgr	65.2461	96.054	71.8239	54.747	35.4442	48.1823
5.99266	2.49922	1.10046	-2.27107	0.023143	0.224283	ENSMUSG00000039763.10	Dnajc28	1.41839	3.5908	0	7.53399	9.08827	14.3245
249.871	0.481868	0.212168	-2.27116	0.0231375	0.224283	ENSMUSG00000030704.14	Rab6a	245.382	195.699	183.97	237.07	327.178	309.93
109.263	-0.696174	0.306628	2.27042	0.023182	0.224487	ENSMUSG00000071076.6	Jund	126.237	146.325	134.827	122.553	52.7119	72.9246
82.5631	0.649852	0.286272	-2.27005	0.0232047	0.224533	ENSMUSG00000033102.15	Cdc14b	58.1542	66.4298	68.0437	92.417	121.783	88.5513
200.061	0.469261	0.206793	-2.26923	0.0232545	0.224841	ENSMUSG00000027293.13	Ehd4	143.258	175.949	182.71	218.486	229.933	250.027
192.725	0.483615	0.213239	-2.26795	0.0233325	0.225277	ENSMUSG00000023022.14	Lima1	184.391	146.325	151.208	199.4	226.298	248.725
151.011	0.584711	0.257821	-2.2679	0.0233356	0.225277	ENSMUSG00000018796.13	Acsl1	130.492	128.371	102.065	129.082	218.118	197.938
10466.3	-0.298628	0.131757	2.2665	0.0234207	0.225925	ENSMUSG00000105827.1	H2bc18	12565.6	10539	11532.1	8930.79	9313.66	9916.44
111.311	-0.601129	0.265405	2.26495	0.0235156	0.226492	ENSMUSG00000084883.2	Ccdc85c	123.4	148.121	132.307	111.503	71.7973	80.7379
39.0668	-0.953157	0.420823	2.26498	0.0235137	0.226492	ENSMUSG00000032845.16	Alpk2	58.1542	52.0666	45.3624	27.6246	38.1707	13.0222
179.839	-0.588816	0.260029	2.26443	0.0235479	0.226628	ENSMUSG00000035828.11	Pim3	226.943	217.244	206.651	201.911	99.9709	126.316
1061.01	0.429753	0.189987	-2.26201	0.0236966	0.227884	ENSMUSG00000037608.16	Bclaf1	900.68	976.698	834.165	1008.55	1606.81	1039.18
761.788	0.503051	0.222429	-2.26163	0.0237204	0.227938	ENSMUSG00000045328.11	Cenpe	536.153	742.398	609.873	631.349	1230.55	820.402
132.342	0.57115	0.252656	-2.26058	0.0237853	0.228386	ENSMUSG00000001518.12	Itfg2	109.216	108.622	103.326	196.888	153.592	122.409
2058.13	1.10782	0.490377	-2.25912	0.0238758	0.22908	ENSMUSG00000025508.13	Rplp2	1334.71	1460.56	1117.68	1214.98	3423.55	3797.29
87.4798	-0.65459	0.289862	2.25828	0.0239281	0.229405	ENSMUSG00000041939.14	Mvk	120.563	87.9747	114.666	83.8784	61.8002	55.9957
35.9921	1.35617	0.600658	-2.25781	0.0239577	0.229514	ENSMUSG00000042842.11	Serpinb6b	19.8575	19.7494	20.1611	18.0816	20.903	117.2
17.6491	1.40226	0.621206	-2.25731	0.0239885	0.229633	ENSMUSG00000062175.13	Tgif2	8.51036	13.4655	6.30034	19.5884	16.3589	41.6712
241.081	0.446282	0.197831	-2.25587	0.0240787	0.229969	ENSMUSG00000024750.11	Zfand5	208.504	207.369	195.31	240.083	312.636	282.583
204.98	-0.621971	0.275648	2.2564	0.0240456	0.229969	ENSMUSG00000044030.4	Irf2bp1	234.035	253.152	262.094	243.097	137.233	100.271
21.2818	-1.14442	0.507289	2.25595	0.0240739	0.229969	ENSMUSG00000003378.9	Grik5	22.6943	35.908	28.9816	13.0589	12.7236	14.3245
7.00862	-2.2424	0.994717	2.2543	0.0241771	0.230732	ENSMUSG00000042372.5	Dmrt3	11.3472	11.6701	12.6007	5.52493	0.908827	0
211.526	0.469598	0.2086	-2.25119	0.0243738	0.23085	ENSMUSG00000020363.6	Gfpt2	195.738	149.018	187.75	223.006	245.383	268.258
45.939	-0.825757	0.366744	2.25159	0.0243481	0.23085	ENSMUSG00000068522.4	Aard	66.6645	51.1689	59.2232	40.1813	24.5383	33.8578
177.601	-0.539624	0.239573	2.25244	0.0242947	0.23085	ENSMUSG00000030763.7	Lcmt1	246.801	163.382	224.292	172.277	139.05	119.805
8.97843	-1.78353	0.792118	2.2516	0.0243479	0.23085	ENSMUSG00000044938.8	Klhl31	9.92876	17.0563	15.1208	5.52493	3.63531	2.60445
113.844	0.649302	0.288203	-2.25293	0.0242635	0.23085	ENSMUSG00000032261.16	Sh3bgrl2	93.614	98.7471	71.8239	93.4215	162.68	162.778
302.502	-0.442168	0.19638	2.25159	0.0243484	0.23085	ENSMUSG00000031226.13	Pbdc1	414.171	307.014	323.837	241.088	237.204	291.698
158.746	0.491109	0.218133	-2.25142	0.0243592	0.23085	ENSMUSG00000024993.15	Fam45a	136.166	141.837	117.186	175.793	192.671	188.823
58.4003	0.855635	0.379867	-2.25246	0.0242934	0.23085	ENSMUSG00000090124.7	Ugt1a7c	26.9495	44.885	51.6628	46.7108	98.1533	82.0402
207.35	-0.499945	0.222056	2.25144	0.024358	0.23085	ENSMUSG00000021288.19	Klc1	251.056	248.663	229.332	196.386	127.236	191.427
467.318	-0.400547	0.177751	2.25342	0.0242326	0.23085	ENSMUSG00000023104.9	Rfc2	594.307	496.428	504.027	403.32	343.536	462.29
915.857	-1.07941	0.479849	2.24947	0.0244826	0.231706	ENSMUSG00000039001.12	Rps21	1208.47	1113.15	1410.02	989.967	339.901	433.641
43.7495	-0.956182	0.425264	2.24845	0.0245478	0.231972	ENSMUSG00000015341.17	Golga7	51.0622	60.1459	63.0034	44.7017	13.6324	29.9512
1233.25	0.328915	0.146269	-2.2487	0.0245314	0.231972	ENSMUSG00000021193.10	Pitrm1	1076.56	1184.96	1015.61	1246.62	1455.03	1420.73
5.40786	-2.42148	1.07735	2.24762	0.0246001	0.232291	ENSMUSG00000068854.7	H2bc21	11.3472	6.2839	10.0805	2.00906	2.72648	0
1443.71	0.37713	0.167839	-2.24698	0.0246414	0.232331	ENSMUSG00000027823.9	Gmps	1194.29	1273.84	1297.87	1298.86	1953.98	1643.41
210.085	-0.472066	0.21007	2.24718	0.0246284	0.232331	ENSMUSG00000030330.15	Ing4	283.679	213.653	235.633	180.314	154.501	192.729
83.3192	-0.69563	0.309647	2.24653	0.0246703	0.232428	ENSMUSG00000033728.14	Lrrc14	90.7772	122.985	97.0252	85.3852	58.1649	45.5779
2043.49	0.328319	0.146197	-2.24573	0.0247211	0.23254	ENSMUSG00000029777.10	Gars	1851	1799.89	1783	1941.76	2516.54	2368.75
462.703	0.399318	0.177813	-2.24573	0.0247216	0.23254	ENSMUSG00000026970.16	Rbms1	425.518	390.5	379.28	465.601	488.949	626.37
62.0513	0.734384	0.327051	-2.24547	0.0247379	0.23254	ENSMUSG00000020326.7	Ccng1	52.4806	51.1689	35.2819	67.3037	73.615	92.458
9.81973	-1.66074	0.740078	2.244	0.0248322	0.233252	ENSMUSG00000044220.13	Nkx2-3	12.7655	17.0563	15.1208	5.52493	4.54413	3.90667
13.9509	-1.42633	0.635835	2.24324	0.0248815	0.233499	ENSMUSG00000061462.18	Obscn	14.1839	26.931	20.1611	9.04079	8.17944	5.2089
43.8479	0.925816	0.412755	-2.24301	0.0248959	0.233499	ENSMUSG00000054400.16	Cklf	28.3679	28.7264	32.7618	32.145	68.162	72.9246
55.727	-0.825691	0.368176	2.24265	0.0249191	0.233516	ENSMUSG00000050961.4	AY358078	96.4508	51.1689	68.0437	47.213	45.4413	26.0445
109.791	0.576784	0.257216	-2.24241	0.024935	0.233516	ENSMUSG00000024581.13	Napg	68.0829	100.542	94.5051	126.069	135.415	134.129
110.743	-0.712093	0.317837	2.24043	0.0250629	0.234363	ENSMUSG00000020018.6	Snrpf	141.839	114.008	158.769	120.544	47.259	82.0402
123.374	0.622084	0.277636	-2.24065	0.025049	0.234363	ENSMUSG00000048528.7	Nkx1-2	102.124	112.213	78.1242	198.897	119.965	128.92
481.315	0.435472	0.194493	-2.23902	0.0251547	0.235047	ENSMUSG00000042446.16	Zmym4	371.619	407.556	446.064	419.392	641.632	601.628
13.1987	-1.56709	0.700139	2.23825	0.0252048	0.235163	ENSMUSG00000028541.14	B4galt2	17.0207	18.8517	23.9413	11.0499	1.81765	6.51112
238.223	0.565761	0.252758	-2.23835	0.025198	0.235163	ENSMUSG00000053799.8	Exoc6	221.269	185.824	167.589	179.811	336.266	338.578
97.9963	-0.60704	0.271343	2.23717	0.0252753	0.235646	ENSMUSG00000027805.16	Pfn2	120.563	116.701	119.706	91.9147	81.7944	57.2979
60.6319	0.778225	0.347949	-2.23661	0.025312	0.235812	ENSMUSG00000030720.16	Cln3	28.3679	52.9643	51.6628	81.8694	59.0737	89.8535
20.7971	-1.14284	0.511105	2.23602	0.0253505	0.235996	ENSMUSG00000030584.14	Dpf1	24.1127	35.0103	26.4614	13.0589	11.8147	14.3245
153.255	0.54807	0.245156	-2.23559	0.0253784	0.236079	ENSMUSG00000026577.13	Blzf1	140.421	107.724	124.747	139.128	201.76	205.752
166.086	-0.497829	0.222745	2.23497	0.0254195	0.236286	ENSMUSG00000023277.13	Twf2	182.973	188.517	212.951	157.712	116.33	138.036
99.9943	-0.611577	0.273796	2.23369	0.0255034	0.23689	ENSMUSG00000069020.9	Urm1	112.053	96.054	154.988	77.8513	80.8856	78.1335
1520.38	0.35929	0.160923	-2.23268	0.0255699	0.237053	ENSMUSG00000037851.13	Iars	1289.32	1274.73	1431.44	1461.59	2043.95	1621.27
607.353	0.416188	0.186458	-2.23208	0.0256096	0.237053	ENSMUSG00000028187.10	Rpf1	550.337	511.689	496.467	526.375	747.964	811.286
243.765	0.566852	0.253967	-2.23199	0.0256156	0.237053	ENSMUSG00000035284.10	Vps13c	194.32	219.039	173.889	183.829	378.981	312.534
165.339	0.500866	0.224357	-2.23245	0.0255852	0.237053	ENSMUSG00000032018.14	Sc5d	123.4	134.655	151.208	170.268	187.218	225.285
74.5732	-0.790303	0.353985	2.23259	0.0255762	0.237053	ENSMUSG00000045896.14	Paip2b	93.614	84.3839	108.366	84.3807	45.4413	31.2534
8.80742	1.95498	0.876123	-2.2314	0.0256546	0.237064	ENSMUSG00000075297.10	H60b	2.83679	6.2839	1.26007	8.53852	20.903	13.0222
60.2839	-0.737441	0.330467	2.23151	0.0256472	0.237064	ENSMUSG00000071176.10	Arhgef10	78.0117	86.1793	63.0034	56.7561	39.9884	37.7645
856.067	0.338351	0.151831	-2.22847	0.0258492	0.23854	ENSMUSG00000005981.11	Trap1	754.586	720.854	791.322	854.355	966.992	1048.29
44.5138	-1.06428	0.477731	2.22779	0.0258948	0.23854	ENSMUSG00000055675.6	Kbtbd11	63.8277	70.0206	46.6225	37.67	7.27061	41.6712
173.766	-0.495404	0.22234	2.22814	0.0258712	0.23854	ENSMUSG00000029056.13	Pank4	214.178	221.732	175.149	152.689	159.045	119.805
74.0907	-0.65279	0.293051	2.22756	0.0259096	0.23854	ENSMUSG00000025371.12	Chmp6	102.124	78.9977	91.9849	63.7878	58.1649	49.4845
324.509	0.459579	0.206276	-2.22798	0.0258817	0.23854	ENSMUSG00000022641.15	Bbx	283.679	298.037	236.893	311.405	468.046	348.996
668.405	0.349424	0.156946	-2.2264	0.0259873	0.238904	ENSMUSG00000028614.14	Ndc1	582.96	581.71	598.532	687.1	845.209	714.921
105.503	-0.605965	0.272142	2.22665	0.0259708	0.238904	ENSMUSG00000004044.9	Cavin1	139.003	110.417	134.827	105.476	69.0708	74.2268
43.0483	-0.845215	0.379746	2.22574	0.0260316	0.239136	ENSMUSG00000028700.14	Pomgnt1	43.9702	71.816	49.1426	29.6337	27.2648	36.4623
205.569	-0.566196	0.254497	2.22476	0.0260972	0.239212	ENSMUSG00000062312.5	Erbb2	245.382	284.571	209.171	227.527	150.865	115.898
281.928	-0.419135	0.188377	2.22498	0.0260825	0.239212	ENSMUSG00000019189.13	Rnf145	280.842	345.615	340.218	247.115	219.936	257.841
250.387	0.501052	0.225183	-2.22508	0.0260756	0.239212	ENSMUSG00000040760.11	Appl1	191.483	186.722	241.933	224.011	293.551	364.623
70.9467	-0.715912	0.321854	2.22434	0.0261258	0.239299	ENSMUSG00000086316.8	Nbdy	89.3588	84.3839	91.9849	69.815	35.4442	54.6934
855.611	0.36382	0.163604	-2.22379	0.0261624	0.239459	ENSMUSG00000047213.14	Ythdf3	795.719	753.171	694.297	806.137	1084.23	1000.11
819.893	0.36228	0.162955	-2.22319	0.0262033	0.239658	ENSMUSG00000037712.16	Fermt2	719.126	763.943	666.576	774.494	1013.34	981.878
536.207	-0.375456	0.168955	2.22223	0.0262677	0.240072	ENSMUSG00000039640.7	Mrpl12	634.022	535.03	648.935	496.741	408.972	493.543
159.754	-0.514197	0.231467	2.22147	0.0263195	0.240369	ENSMUSG00000020514.8	Mrpl22	228.361	175.949	160.029	138.123	115.421	140.64
24.9791	1.13333	0.510398	-2.22049	0.0263859	0.2408	ENSMUSG00000025497.15	Cdhr5	19.8575	10.7724	16.3809	21.5974	40.8972	40.369
490.463	-0.366436	0.165119	2.21922	0.026472	0.24141	ENSMUSG00000049760.6	Micos13	585.797	517.076	553.17	406.333	399.884	480.521
675.394	0.351842	0.158703	-2.21698	0.0266246	0.242625	ENSMUSG00000002010.17	Idh3g	635.441	528.746	616.173	692.123	772.503	807.379
1151.52	-0.357216	0.16122	2.2157	0.0267117	0.243242	ENSMUSG00000044627.11	Swi5	1377.26	1205.61	1299.13	1141.65	830.668	1054.8
571.816	0.401422	0.181205	-2.21529	0.0267399	0.243321	ENSMUSG00000021111.15	Papola	476.58	514.382	483.866	519.343	657.991	778.731
69.458	-0.682402	0.308168	2.21438	0.0268027	0.243457	ENSMUSG00000025743.14	Sdc3	99.2876	75.4069	83.1645	62.7833	42.7149	53.3912
288.02	-0.490755	0.221667	2.21393	0.0268338	0.243457	ENSMUSG00000001870.16	Ltbp1	314.883	378.83	318.797	315.423	212.665	187.52
480.268	0.469477	0.212005	-2.21446	0.0267968	0.243457	ENSMUSG00000034560.6	Washc4	374.456	403.068	428.423	381.722	677.985	615.952
7.67572	-2.63467	1.18998	2.21404	0.0268261	0.243457	ENSMUSG00000091014.3	Gm5244	32.6231	5.3862	2.52014	5.52493	0	0
467.226	-0.367128	0.165847	2.21366	0.026852	0.243457	ENSMUSG00000007050.17	Lsm2	553.174	470.395	555.69	404.324	383.525	436.245
18.2042	-1.34605	0.608418	2.21237	0.0269408	0.244086	ENSMUSG00000035268.14	Pkig	15.6023	23.3402	39.0621	11.0499	4.54413	15.6267
53.369	-0.766112	0.346407	2.2116	0.0269946	0.244395	ENSMUSG00000048232.12	Fbxo10	52.4806	62.839	86.9447	43.1949	40.8972	33.8578
580.743	-0.376298	0.17026	2.21014	0.0270956	0.244621	ENSMUSG00000021361.7	Tmem14c	605.654	615.823	748.48	516.33	558.02	440.152
602.082	0.377207	0.170646	-2.21047	0.0270725	0.244621	ENSMUSG00000028948.16	Nol9	565.939	500.019	506.547	632.353	803.403	604.232
352.636	-0.441321	0.199682	2.21012	0.0270965	0.244621	ENSMUSG00000016427.7	Ndufa1	401.406	350.103	470.005	360.125	258.107	276.072
395.602	-0.395767	0.179071	2.21011	0.0270976	0.244621	ENSMUSG00000015804.14	Med28	510.622	412.045	425.903	342.546	303.548	378.947
180.378	-0.56439	0.255445	2.20944	0.0271444	0.244866	ENSMUSG00000035781.14	R3hdm4	215.596	211.857	221.772	202.413	129.053	101.574
253.903	0.508324	0.230147	-2.20869	0.0271959	0.244976	ENSMUSG00000030986.13	Dhx32	219.851	157.098	252.014	234.056	333.539	326.858
459.71	-1.02514	0.4641	2.20888	0.0271828	0.244976	ENSMUSG00000032288.9	Imp3	692.176	559.267	599.792	504.275	182.674	220.076
825.891	-0.412892	0.186984	2.20817	0.0272326	0.244976	ENSMUSG00000042745.9	Id1	1031.17	760.352	1042.08	853.852	590.737	677.157
122.655	-0.573116	0.259548	2.20814	0.0272348	0.244976	ENSMUSG00000020781.14	Tsen54	150.35	137.348	154.988	127.073	85.4297	80.7379
11.0386	-1.67429	0.758498	2.20737	0.0272881	0.245111	ENSMUSG00000030046.6	Bmp10	15.6023	25.1356	8.82047	3.0136	4.54413	9.11557
657.807	-0.335356	0.151926	2.20736	0.0272889	0.245111	ENSMUSG00000026281.15	Dtymk	788.627	677.764	737.14	603.222	567.108	572.979
611.083	-0.445577	0.201904	2.20688	0.0273225	0.245236	ENSMUSG00000020153.14	Ndufs7	731.891	634.674	752.26	688.607	437.146	421.921
114.515	0.630962	0.285982	-2.2063	0.0273632	0.245426	ENSMUSG00000035173.14	Ccdc186	86.522	87.077	94.5051	90.4079	164.498	164.08
423.447	0.416522	0.188849	-2.20558	0.0274134	0.2457	ENSMUSG00000020530.14	Ggnbp2	353.18	353.694	379.28	378.709	547.114	528.703
40.8094	0.887613	0.402505	-2.20523	0.0274383	0.245748	ENSMUSG00000044250.8	Pced1b	31.2047	28.7264	25.2014	35.6609	56.3473	67.7157
206.793	-0.525745	0.238601	2.20345	0.027563	0.24616	ENSMUSG00000048351.14	Coa7	260.985	200.187	274.695	218.988	151.774	134.129
133.49	-0.548344	0.248851	2.2035	0.0275594	0.24616	ENSMUSG00000007867.9	Ift43	175.881	170.563	131.047	129.082	104.515	89.8535
161.641	-0.494212	0.224278	2.20357	0.0275543	0.24616	ENSMUSG00000044066.14	Cep68	195.738	175.949	197.831	157.712	125.418	117.2
30.8103	-1.06639	0.483884	2.20382	0.0275372	0.24616	ENSMUSG00000031149.7	Praf2	28.3679	43.9873	54.1829	30.6382	17.2677	10.4178
447.114	0.405175	0.18391	-2.20312	0.0275864	0.246193	ENSMUSG00000031016.9	Wee1	414.171	367.16	371.72	411.858	582.558	535.214
209.11	0.507279	0.23046	-2.20116	0.0277244	0.246787	ENSMUSG00000030313.15	Dennd5b	139.003	204.676	171.369	194.377	262.651	282.583
896.73	0.3413	0.155062	-2.20105	0.0277322	0.246787	ENSMUSG00000017760.16	Ctsa	868.057	712.774	793.843	931.201	1106.95	967.553
7.89196	-1.95475	0.888318	2.2005	0.0277712	0.246787	ENSMUSG00000036169.6	Sostdc1	21.2759	5.3862	11.3406	4.01813	2.72648	2.60445
376.516	-0.397527	0.180638	2.20069	0.0277581	0.246787	ENSMUSG00000039515.11	Ptpa	460.978	402.17	423.383	372.179	282.645	317.743
293.685	-0.42862	0.194743	2.20096	0.0277391	0.246787	ENSMUSG00000020156.16	Pwwp3a	381.548	323.172	308.717	290.31	222.663	235.703
26.0999	-1.32148	0.600498	2.20064	0.0277614	0.246787	ENSMUSG00000002274.13	Metrn	24.1127	35.0103	54.1829	29.6337	4.54413	9.11557
254.5	-0.411593	0.187128	2.19952	0.0278406	0.247045	ENSMUSG00000031066.10	Usp11	268.076	289.957	313.757	227.527	206.304	221.378
60.1988	-0.721686	0.328163	2.19917	0.0278659	0.247045	ENSMUSG00000044636.6	Csrnp2	56.7358	81.6908	86.9447	52.7379	42.7149	40.369
1200.85	-0.33217	0.151016	2.19958	0.027837	0.247045	ENSMUSG00000015671.11	Psma2	1419.81	1296.28	1302.91	1218	979.715	988.389
73.4183	-0.719585	0.327235	2.19898	0.0278791	0.247045	ENSMUSG00000034685.4	Fam171a2	93.614	96.9517	85.6846	79.3581	44.5325	40.369
102.508	0.687488	0.312924	-2.19698	0.0280218	0.247784	ENSMUSG00000039031.16	Arhgap18	75.1749	78.1	80.6443	73.3309	146.321	161.476
666.391	0.450839	0.205169	-2.1974	0.0279918	0.247784	ENSMUSG00000021945.9	Zmym2	483.672	608.641	593.492	536.923	897.921	877.7
977.627	0.304865	0.138752	-2.19718	0.0280073	0.247784	ENSMUSG00000027671.14	Actl6a	865.22	889.621	868.187	1040.19	1096.95	1105.59
114.272	-0.683518	0.311258	2.19599	0.0280929	0.248217	ENSMUSG00000078931.4	Pdf	161.697	129.269	134.827	134.105	64.5267	61.2046
306.637	0.472185	0.215094	-2.19526	0.0281452	0.248217	ENSMUSG00000026034.17	Clk1	248.219	230.709	289.816	269.215	361.713	440.152
1013.36	-0.354344	0.161396	2.19549	0.0281284	0.248217	ENSMUSG00000017493.12	Igfbp4	1171.59	1079.93	1164.3	1058.27	823.397	782.637
323.621	0.448036	0.204099	-2.19519	0.0281502	0.248217	ENSMUSG00000029486.13	Mrpl1	312.047	267.515	240.673	294.83	430.784	395.876
68.058	-0.667077	0.304024	2.19416	0.028224	0.248693	ENSMUSG00000024325.8	Ring1	80.8485	74.5092	94.5051	48.7198	47.259	62.5068
431.988	-0.397981	0.181449	2.19335	0.028282	0.249029	ENSMUSG00000058267.13	Mrps14	588.634	456.032	430.943	402.315	348.081	365.925
26.4004	-1.1284	0.514553	2.19297	0.0283099	0.249099	ENSMUSG00000030814.17	Bcl7c	29.7863	38.6011	41.5822	27.6246	9.08827	11.72
259.89	-0.5043	0.230075	2.1919	0.028387	0.249602	ENSMUSG00000028062.15	Lamtor2	361.69	227.118	328.878	261.681	178.13	201.845
22.0903	1.20772	0.551144	-2.19129	0.0284307	0.249811	ENSMUSG00000017453.4	Pipox	17.0207	8.07931	15.1208	18.0816	39.0795	35.1601
15.2726	1.55459	0.709719	-2.19043	0.0284932	0.250185	ENSMUSG00000030544.5	Mesp1	12.7655	8.97701	1.26007	12.0544	22.7207	33.8578
142.098	0.532136	0.243019	-2.18968	0.0285472	0.250483	ENSMUSG00000017291.13	Taok1	96.4508	130.167	120.966	152.187	201.76	151.058
265.603	0.465862	0.212806	-2.18914	0.0285869	0.250655	ENSMUSG00000021965.3	Ska3	224.106	245.97	196.571	238.074	339.901	348.996
1135.48	-0.358302	0.163735	2.1883	0.0286476	0.251012	ENSMUSG00000038462.3	Uqcrfs1	1442.51	1029.66	1358.35	1059.78	961.539	961.042
1671.39	-0.297736	0.136196	2.18609	0.0288093	0.251996	ENSMUSG00000027203.15	Dut	1934.69	1777.45	1819.54	1600.72	1402.32	1493.65
222.626	-0.47183	0.215848	2.18594	0.0288203	0.251996	ENSMUSG00000027628.10	Aar2	260.985	239.686	278.475	231.545	163.589	161.476
476.007	-0.430865	0.197066	2.1864	0.0287862	0.251996	ENSMUSG00000035027.18	Map2k2	551.755	521.564	570.811	514.823	387.16	309.93
1720.64	0.338471	0.154889	-2.18525	0.0288703	0.252258	ENSMUSG00000040028.10	Elavl1	1548.89	1425.55	1585.17	1713.23	2274.79	1776.23
721.491	0.349457	0.160006	-2.18403	0.0289603	0.252867	ENSMUSG00000027775.9	Mfsd1	695.013	623.902	584.671	735.318	906.1	783.939
59.3831	-0.74642	0.34212	2.18175	0.0291282	0.25398	ENSMUSG00000025218.6	Poll	72.3381	89.7701	61.7433	56.7561	32.7178	42.9734
26.5605	-2.84501	1.30389	2.18195	0.0291135	0.25398	ENSMUSG00000060081.1	H2ac1	89.3588	32.3172	18.901	16.5748	0.908827	1.30222
1704.29	0.3306	0.151581	-2.18101	0.029183	0.254104	ENSMUSG00000018848.4	Rars	1448.18	1497.36	1581.38	1591.68	2073.03	2034.08
324.577	0.416679	0.191028	-2.18124	0.0291654	0.254104	ENSMUSG00000033792.12	Atp7a	238.29	291.753	302.416	326.473	422.604	365.925
44.5912	0.824122	0.37792	-2.18068	0.0292069	0.254135	ENSMUSG00000037010.7	Apln	42.5518	23.3402	31.5017	52.2357	64.5267	53.3912
123.677	-0.543432	0.249242	2.18034	0.0292322	0.254178	ENSMUSG00000068748.7	Ptprz1	139.003	174.154	126.007	92.417	115.421	95.0624
574.847	0.391737	0.179747	-2.17938	0.0293035	0.254458	ENSMUSG00000004317.14	Clcn5	517.714	491.042	483.866	602.217	803.403	550.841
547.162	-0.428268	0.196573	2.17867	0.0293564	0.254458	ENSMUSG00000016559.14	H3f3b	608.491	682.252	596.012	607.24	403.519	385.459
121.445	0.64043	0.294009	-2.17826	0.0293864	0.254458	ENSMUSG00000013663.7	Pten	78.0117	105.929	98.2853	95.4306	151.774	199.24
1151.47	-0.318118	0.146059	2.17801	0.029405	0.254458	ENSMUSG00000023118.15	Sympk	1321.94	1369.89	1142.88	1084.39	1016.98	972.762
202.172	-0.518741	0.238155	2.17817	0.0293935	0.254458	ENSMUSG00000025316.16	Banp	309.21	231.607	175.149	187.848	149.048	160.174
214.768	0.489373	0.22469	-2.17799	0.0294066	0.254458	ENSMUSG00000026718.17	Stam	173.044	206.471	153.728	197.893	264.469	293.001
8.20731	-1.80457	0.828366	2.17847	0.029371	0.254458	ENSMUSG00000053552.14	Ebf4	15.6023	13.4655	8.82047	2.51133	3.63531	5.2089
867.118	0.389709	0.178978	-2.17741	0.0294499	0.25448	ENSMUSG00000027469.16	Tpx2	751.749	748.682	752.26	890.518	1246.91	812.588
68.5822	-0.700637	0.321774	2.17742	0.0294495	0.25448	ENSMUSG00000021294.7	Kif26a	76.5933	93.3609	85.6846	67.8059	37.2619	50.7868
397.572	0.406423	0.186907	-2.17447	0.0296699	0.256204	ENSMUSG00000031093.14	Dock11	302.118	342.922	379.28	385.238	525.302	450.57
392.784	-1.02017	0.46961	2.17237	0.029828	0.257392	ENSMUSG00000029614.13	Rpl6	651.043	454.237	475.046	427.931	181.765	166.685
75.605	-0.714278	0.328989	2.17113	0.0299214	0.257561	ENSMUSG00000007610.15	Gtpbp3	89.3588	92.4632	102.065	82.8739	39.9884	46.8801
36.4856	-1.27328	0.586349	2.17154	0.0298907	0.257561	ENSMUSG00000078302.5	Foxd1	41.1334	53.862	61.7433	47.213	4.54413	10.4178
42.372	-0.935747	0.431018	2.17102	0.0299298	0.257561	ENSMUSG00000015579.5	Nkx2-5	58.1542	59.2482	51.6628	47.213	23.6295	14.3245
134.428	1.67555	0.771681	-2.1713	0.0299086	0.257561	ENSMUSG00000069049.11	Eif2s3y	21.2759	35.0103	136.087	200.906	185.401	227.889
11.4212	-1.48598	0.684805	2.16994	0.0300117	0.25803	ENSMUSG00000031534.15	Smim19	17.0207	16.1586	17.6409	6.52946	7.27061	3.90667
14.2245	-1.40051	0.645471	2.16975	0.0300255	0.25803	ENSMUSG00000039137.18	Whrn	18.4391	26.931	16.3809	9.54306	3.63531	10.4178
1364.3	0.398905	0.183879	-2.16939	0.0300529	0.258088	ENSMUSG00000024120.12	Lrpprc	1154.57	1149.06	1226.05	1208.95	2012.14	1435.05
392.58	0.416616	0.192246	-2.1671	0.0302272	0.258507	ENSMUSG00000074656.12	Eif2s2	363.109	351.001	292.336	364.645	463.502	520.89
847.975	0.336893	0.155613	-2.16494	0.0303923	0.258507	ENSMUSG00000021670.14	Hmgcr	802.811	684.946	759.821	837.278	983.351	1019.64
57.8212	0.76759	0.354084	-2.16782	0.0301723	0.258507	ENSMUSG00000027219.13	Slc28a2	39.715	33.2149	55.443	54.747	90.8827	72.9246
3103.75	0.3166	0.146052	-2.16771	0.0301806	0.258507	ENSMUSG00000000568.15	Hnrnpd	2744.59	2865.46	2681.42	2958.85	3934.31	3437.87
128.428	-0.556618	0.256916	2.16654	0.0302701	0.258507	ENSMUSG00000030663.12	1110004F10Rik	164.534	148.121	148.688	134.607	89.9738	84.6446
53.4423	-2.60893	1.20392	2.16702	0.0302332	0.258507	ENSMUSG00000078193.2	Gm2000	129.074	94.2586	52.9228	38.6745	1.81765	3.90667
145.478	0.536349	0.24763	-2.16593	0.0303167	0.258507	ENSMUSG00000021703.9	Serinc5	95.0324	140.939	119.706	174.789	201.76	140.64
83.497	-0.658607	0.30389	2.16725	0.0302156	0.258507	ENSMUSG00000032381.5	Ciao2a	107.798	109.519	90.7249	85.3852	46.3502	61.2046
16.4137	1.28329	0.592594	-2.16556	0.0303452	0.258507	ENSMUSG00000015401.12	Cltrn	11.3472	10.7724	6.30034	19.0861	23.6295	27.3467
98.1012	-0.556238	0.256779	2.16621	0.030295	0.258507	ENSMUSG00000052419.7	2610001J05Rik	124.819	106.826	119.706	85.3852	76.3414	75.529
501.625	-0.365344	0.168774	2.16469	0.0304114	0.258507	ENSMUSG00000025785.5	Exosc7	554.592	555.677	587.192	493.225	445.325	373.739
14.7177	1.77823	0.821212	-2.16538	0.0303588	0.258507	ENSMUSG00000036908.17	Unc93b1	15.6023	0	5.04027	21.5974	10.9059	35.1601
54.0911	-0.832643	0.384028	2.16819	0.0301446	0.258507	ENSMUSG00000041629.7	Fam104a	76.5933	65.5321	68.0437	55.2493	40.8972	18.2311
7.00872	2.63671	1.21802	-2.16475	0.0304065	0.258507	ENSMUSG00000059908.9	Mug1	1.41839	0.897701	3.7802	31.1405	0.908827	3.90667
260.719	-0.516898	0.238621	2.16619	0.0302963	0.258507	ENSMUSG00000063450.14	Syne2	243.964	428.203	245.713	196.888	209.939	239.609
122.74	0.543718	0.25133	-2.16336	0.0305133	0.258874	ENSMUSG00000042195.9	Slc35f2	110.635	113.11	75.6041	143.648	155.409	138.036
10.1616	-1.6649	0.769845	2.16264	0.0305691	0.258874	ENSMUSG00000025400.11	Tac2	12.7655	17.954	16.3809	8.53852	2.72648	2.60445
563.713	0.403126	0.186372	-2.16302	0.0305393	0.258874	ENSMUSG00000025326.12	Ube3a	445.376	552.984	454.884	513.818	749.782	665.437
836.615	0.359821	0.166352	-2.16301	0.0305407	0.258874	ENSMUSG00000037487.7	Ubr5	690.758	818.703	686.737	824.219	1094.23	905.046
80.1853	-0.688471	0.318347	2.16264	0.0305685	0.258874	ENSMUSG00000072941.5	Sod3	76.5933	122.087	99.5453	81.8694	55.4384	45.5779
182.362	0.497118	0.22988	-2.16251	0.0305786	0.258874	ENSMUSG00000023088.17	Abcc1	130.492	187.619	133.567	217.481	185.401	239.609
148.228	-0.574706	0.265851	2.16176	0.0306367	0.25919	ENSMUSG00000022554.7	Hgh1	191.483	153.507	190.27	163.739	92.7003	97.6669
627.859	-0.380352	0.176043	2.16056	0.0307291	0.259797	ENSMUSG00000020219.7	Timm13	780.117	601.459	751	604.728	460.775	569.072
107.969	0.534067	0.247352	-2.15914	0.0308391	0.260484	ENSMUSG00000027963.14	Extl2	96.4508	81.6908	86.9447	126.571	127.236	128.92
28.3006	-1.09844	0.50915	2.1574	0.0309744	0.260484	ENSMUSG00000037060.3	Cavin3	31.2047	36.8057	47.8826	24.1088	6.36179	23.44
327.168	-0.444075	0.205884	2.15692	0.0310119	0.260484	ENSMUSG00000026295.12	Spp2	368.782	349.206	412.042	215.974	343.536	273.467
57.3415	-0.786059	0.364171	2.15849	0.0308897	0.260484	ENSMUSG00000022428.8	Cby1	83.6852	58.3505	78.1242	58.7651	39.0795	26.0445
313.85	-0.470075	0.217931	2.15698	0.0310069	0.260484	ENSMUSG00000001289.12	Pfdn5	385.803	292.65	415.822	287.799	196.307	304.721
44.7421	-0.824937	0.382418	2.15716	0.0309931	0.260484	ENSMUSG00000027937.15	Jtb	56.7358	64.6344	51.6628	44.1994	29.0825	22.1378
256.283	-0.519446	0.240837	2.15684	0.0310184	0.260484	ENSMUSG00000030602.13	Pak4	333.323	292.65	283.515	295.333	163.589	169.289
50.9461	-0.787713	0.365088	2.1576	0.0309589	0.260484	ENSMUSG00000045886.7	Gm9803	85.1036	52.0666	57.9631	42.6926	41.806	26.0445
25.6982	-1.05931	0.490973	2.15757	0.0309609	0.260484	ENSMUSG00000015222.18	Map2	21.2759	36.8057	46.6225	19.5884	18.1765	11.72
243.478	-0.546698	0.253396	2.15748	0.0309682	0.260484	ENSMUSG00000035585.16	Tsen34	314.883	293.548	262.094	285.789	141.777	162.778
93.6164	0.751111	0.348328	-2.15633	0.0310576	0.260637	ENSMUSG00000056260.15	Lrif1	63.8277	64.6344	79.3843	58.2629	135.415	160.174
129.317	0.654217	0.30343	-2.15607	0.0310783	0.260637	ENSMUSG00000038544.14	Inip	104.961	112.213	81.9044	102.462	139.959	234.4
214.845	0.653679	0.30328	-2.15536	0.0311337	0.260897	ENSMUSG00000023039.17	Krt7	153.187	169.665	176.409	241.59	135.415	412.805
424.946	0.384011	0.178184	-2.15514	0.031151	0.260897	ENSMUSG00000048874.15	Phf3	361.69	383.318	359.119	403.32	543.478	498.752
611.793	0.377258	0.175121	-2.15428	0.0312186	0.26094	ENSMUSG00000005575.16	Ube2m	594.307	530.541	470.005	606.235	657.082	812.588
896.649	0.367556	0.170585	-2.15468	0.0311872	0.26094	ENSMUSG00000054309.9	Cpsf3	916.283	732.524	700.598	876.957	1156.03	997.504
37.3751	1.02151	0.474149	-2.15441	0.0312081	0.26094	ENSMUSG00000048330.14	Ric3	11.3472	20.6471	41.5822	33.1496	65.4355	52.089
533.447	-0.500558	0.232405	2.15382	0.031254	0.261017	ENSMUSG00000022043.19	Trim35	716.289	587.994	575.851	634.362	376.254	309.93
119.359	0.57722	0.268022	-2.15363	0.0312696	0.261017	ENSMUSG00000029571.14	Tmem106b	90.7772	117.599	76.8641	113.512	157.227	160.174
427.339	0.465827	0.21642	-2.15243	0.0313638	0.261129	ENSMUSG00000023045.13	Soat2	422.681	261.231	394.401	410.854	603.461	471.405
103.678	0.629258	0.292425	-2.15186	0.0314081	0.261129	ENSMUSG00000044447.5	Dock5	70.9197	94.2586	76.8641	85.8875	141.777	152.36
176.452	0.486837	0.226203	-2.15221	0.0313808	0.261129	ENSMUSG00000039428.11	Tmem135	153.187	142.734	143.648	162.232	229.024	227.889
56.5184	-0.771521	0.358533	2.15189	0.0314064	0.261129	ENSMUSG00000020312.12	Shc2	75.1749	78.1	61.7433	57.7606	27.2648	39.0667
69.279	0.69611	0.323439	-2.15221	0.0313806	0.261129	ENSMUSG00000097333.7	Zfp87	49.6438	61.9413	45.3624	63.7878	88.1562	106.782
554.003	-0.411859	0.191351	2.15237	0.0313683	0.261129	ENSMUSG00000076437.10	Selenoh	714.871	582.608	602.312	564.547	363.531	496.148
133.277	-0.545593	0.253626	2.15117	0.0314627	0.26141	ENSMUSG00000030232.18	Aebp2	126.237	192.108	156.248	112.005	124.509	88.5513
184.513	0.478899	0.222704	-2.15038	0.031525	0.261754	ENSMUSG00000035376.10	Hacd2	161.697	151.711	147.428	173.282	219.027	253.934
156.862	-1.3349	0.621091	2.14928	0.0316124	0.262305	ENSMUSG00000042079.13	Hnrnpf	229.78	191.21	254.534	163.237	67.2532	35.1601
541.107	0.330062	0.153605	-2.14877	0.0316525	0.262464	ENSMUSG00000019889.10	Ptprk	506.367	470.395	462.445	609.249	604.37	593.815
540.35	0.513887	0.23922	-2.14818	0.0316997	0.262681	ENSMUSG00000024795.11	Kif20b	382.966	535.927	413.302	397.293	840.665	671.948
591.534	-0.464168	0.216103	2.14791	0.0317212	0.262686	ENSMUSG00000060938.14	Rpl26	672.319	651.731	738.4	670.525	478.952	337.276
416.71	0.399593	0.186232	-2.14567	0.0318994	0.26364	ENSMUSG00000058587.9	Tmod3	360.272	363.569	351.559	378.709	495.311	550.841
179.853	-0.516763	0.24087	2.1454	0.0319206	0.26364	ENSMUSG00000036565.7	Ttyh3	190.065	220.834	226.812	194.879	125.418	121.107
122.604	0.613636	0.285958	-2.1459	0.0318811	0.26364	ENSMUSG00000027173.7	Depdc7	83.6852	92.4632	113.406	98.9464	190.854	156.267
176.101	0.464805	0.216646	-2.14546	0.0319158	0.26364	ENSMUSG00000046798.14	Cldn12	137.584	174.154	131.047	209.947	198.124	205.752
22.834	1.1184	0.521452	-2.14477	0.031971	0.263708	ENSMUSG00000034762.9	Glis1	14.1839	8.97701	20.1611	24.1088	31.8089	37.7645
214.696	-0.47324	0.220624	2.14501	0.0319523	0.263708	ENSMUSG00000024944.6	Arl2	278.005	234.3	239.413	224.513	151.774	160.174
24.6357	-1.09535	0.510999	2.14355	0.0320686	0.264339	ENSMUSG00000028788.14	Ptp4a2	25.5311	45.7827	30.2416	22.602	14.5412	9.11557
5.01077	-2.42865	1.13344	2.14272	0.032136	0.264701	ENSMUSG00000048988.8	Elfn1	7.09197	10.7724	7.56041	1.00453	3.63531	0
998.076	-0.334926	0.156326	2.14248	0.0321548	0.264701	ENSMUSG00000068855.3	H2ac20	1181.52	965.926	1193.28	809.151	966.083	872.491
42.6642	0.86646	0.404652	-2.14124	0.0322543	0.265171	ENSMUSG00000072872.3	Rybp	32.6231	29.6241	27.7215	33.6518	67.2532	65.1112
82.8331	-0.618314	0.288735	2.14146	0.0322372	0.265171	ENSMUSG00000044949.4	Ubtd2	114.89	83.4862	102.065	60.7742	56.3473	79.4357
777.721	0.326712	0.152631	-2.14054	0.0323114	0.265344	ENSMUSG00000021242.9	Npc2	724.799	623.902	722.019	861.386	807.038	927.184
122.095	0.558409	0.261011	-2.13941	0.0324024	0.265344	ENSMUSG00000033813.15	Tcea1	79.4301	121.19	93.245	121.548	151.774	165.383
636.533	0.349371	0.163268	-2.13986	0.0323661	0.265344	ENSMUSG00000026116.11	Tmem131	520.551	609.539	546.869	629.339	788.862	724.037
19.7897	-1.21751	0.569085	2.13942	0.0324014	0.265344	ENSMUSG00000028407.4	Smim27	19.8575	25.1356	37.802	13.5612	5.45296	16.9289
679.187	0.371891	0.173818	-2.13954	0.0323923	0.265344	ENSMUSG00000036990.13	Otud4	578.705	651.731	543.089	630.344	874.291	796.962
289.142	0.388089	0.18136	-2.13988	0.0323645	0.265344	ENSMUSG00000033918.16	Parl	238.29	273.799	238.153	316.428	342.628	325.556
601.617	0.358218	0.167473	-2.13896	0.0324388	0.265468	ENSMUSG00000020745.15	Pafah1b1	526.224	518.871	535.529	574.09	775.229	679.761
5.52936	-2.36157	1.10427	2.13858	0.0324698	0.265549	ENSMUSG00000037034.16	Pax1	17.0207	6.2839	5.04027	3.0136	1.81765	0
666.515	0.357389	0.167212	-2.13734	0.03257	0.266024	ENSMUSG00000045394.9	Epcam	612.746	509.894	630.034	650.937	781.591	813.891
85.1215	-0.574112	0.268611	2.13734	0.0325705	0.266024	ENSMUSG00000028923.14	Necap2	99.2876	99.6448	107.106	72.3263	67.2532	65.1112
226.739	-0.550241	0.257499	2.13686	0.0326091	0.266166	ENSMUSG00000089824.10	Rbm12	270.913	251.356	289.816	236.567	206.304	105.48
310.637	0.429372	0.200971	-2.13649	0.0326392	0.26623	ENSMUSG00000027668.13	Mfn1	229.78	286.366	275.955	292.821	420.787	358.112
130.288	0.660625	0.309266	-2.13611	0.0326706	0.26623	ENSMUSG00000035834.11	Polr3g	78.0117	96.054	127.267	92.417	201.76	186.218
71.3716	-0.777179	0.363851	2.13598	0.0326807	0.26623	ENSMUSG00000010797.6	Wnt2	99.2876	102.338	70.5638	80.8649	30.9001	44.2756
284.911	0.38314	0.179497	-2.13452	0.0328003	0.266691	ENSMUSG00000042390.9	Gatad2b	236.872	252.254	252.014	306.382	338.992	322.952
220.684	0.463694	0.217263	-2.13425	0.0328226	0.266691	ENSMUSG00000027652.15	Ralgapb	165.952	206.471	181.45	202.916	280.827	286.489
271.239	-0.517727	0.242508	2.13488	0.0327704	0.266691	ENSMUSG00000022769.9	Sdf2l1	310.628	312.4	338.958	318.939	177.221	169.289
75.8027	0.722573	0.33852	-2.13451	0.0328014	0.266691	ENSMUSG00000024589.18	Nedd4l	38.2966	71.816	59.2232	69.3127	87.2474	128.92
412.032	-0.367414	0.172195	2.13371	0.0328666	0.266876	ENSMUSG00000020235.16	Fzr1	497.856	455.134	442.284	404.827	342.628	329.463
291.26	-0.406267	0.190542	2.13217	0.0329932	0.267249	ENSMUSG00000023939.7	Mrpl14	329.067	305.218	362.899	276.749	214.483	259.143
664.404	0.40671	0.190767	-2.13197	0.0330092	0.267249	ENSMUSG00000020572.8	Nampt	567.358	560.165	583.411	562.538	777.956	934.998
581.214	0.432072	0.202664	-2.13196	0.03301	0.267249	ENSMUSG00000020608.7	Smc6	397.15	487.451	598.532	543.452	825.215	635.486
232.211	-0.43843	0.205657	2.13185	0.0330193	0.267249	ENSMUSG00000047514.6	Tspyl1	259.566	277.389	267.134	228.029	203.577	157.569
396.68	0.445997	0.209136	-2.13257	0.0329598	0.267249	ENSMUSG00000020464.15	Pnpt1	329.067	323.172	352.819	323.962	508.034	543.028
176.907	0.502477	0.23575	-2.1314	0.0330559	0.267335	ENSMUSG00000021893.14	Capn7	140.421	154.405	142.388	154.196	240.839	229.192
387.97	0.464848	0.218116	-2.1312	0.0330727	0.267335	ENSMUSG00000026643.16	Nmt2	374.456	286.366	316.277	316.428	540.752	493.543
95.9075	-0.650248	0.30518	2.1307	0.0331135	0.267493	ENSMUSG00000039501.14	Znfx1	126.237	105.929	120.966	75.3399	102.697	44.2756
455.255	-0.457782	0.21491	2.13011	0.0331627	0.267717	ENSMUSG00000039953.13	Clstn1	550.337	549.393	485.126	505.28	374.437	266.956
187.069	0.503823	0.236569	-2.12971	0.0331956	0.26781	ENSMUSG00000025173.13	Wdr45b	153.187	152.609	156.248	177.3	192.671	290.396
2978.77	0.279089	0.131071	-2.1293	0.0332293	0.26791	ENSMUSG00000027642.15	Rpn2	2808.42	2682.33	2583.14	3048.76	3464.45	3285.51
492.235	0.354816	0.166662	-2.12896	0.0332574	0.267964	ENSMUSG00000063052.9	Lrrc40	434.029	400.374	461.185	493.225	600.734	563.863
15.6637	-1.28489	0.603782	2.12807	0.0333314	0.268388	ENSMUSG00000042895.6	Abra	12.7655	29.6241	23.9413	8.53852	9.99709	9.11557
95.6591	0.663453	0.311844	-2.12752	0.033377	0.268481	ENSMUSG00000032745.18	Gpbp1	93.614	61.0436	66.7836	82.3717	109.968	160.174
21.8041	-1.28783	0.60535	2.12741	0.0333859	0.268481	ENSMUSG00000057667.7	Bloc1s3	28.3679	29.6241	36.542	25.1133	7.27061	3.90667
341.722	0.359736	0.169134	-2.12693	0.0334261	0.268631	ENSMUSG00000027397.14	Slc20a1	307.792	295.344	294.856	375.695	389.887	386.761
4043.46	0.310952	0.146216	-2.12666	0.0334481	0.268636	ENSMUSG00000033161.10	Atp1a1	3682.15	3797.27	3349.26	4358.16	5150.32	3923.6
195.612	-0.517758	0.243553	2.12586	0.0335153	0.268866	ENSMUSG00000022433.20	Csnk1e	208.504	272.901	210.431	204.422	117.239	160.174
121.213	0.538882	0.253496	-2.1258	0.0335197	0.268866	ENSMUSG00000033159.14	Cnppd1	90.7772	114.906	90.7249	149.173	164.498	117.2
51.9947	-0.791627	0.372608	2.12456	0.0336236	0.269527	ENSMUSG00000025825.12	Iscu	70.9197	64.6344	64.2635	52.2357	39.0795	20.8356
176.848	0.49363	0.2324	-2.12405	0.0336656	0.269691	ENSMUSG00000063531.7	Sema3e	117.727	182.233	139.868	234.558	192.671	194.032
40.572	0.80531	0.379245	-2.12345	0.0337158	0.26992	ENSMUSG00000020140.15	Lgr5	29.7863	30.5218	27.7215	43.6972	51.8031	59.9023
108.41	0.597112	0.281405	-2.12189	0.0338468	0.270007	ENSMUSG00000025198.16	Erlin1	80.8485	91.5655	84.4245	91.9147	136.324	165.383
121.586	-0.548179	0.258423	2.12124	0.0339015	0.270007	ENSMUSG00000045128.9	Rpl18a	148.931	145.427	141.128	127.073	83.6121	83.3424
209.308	0.498627	0.235133	-2.12062	0.0339542	0.270007	ENSMUSG00000022020.15	Naa16	165.952	169.665	182.71	172.78	271.739	293.001
191.173	0.547203	0.258015	-2.12082	0.0339367	0.270007	ENSMUSG00000024135.10	Srbd1	130.492	179.54	154.988	183.829	317.181	181.009
145.97	0.493785	0.232644	-2.12249	0.0337963	0.270007	ENSMUSG00000079509.10	Zfx	126.237	109.519	127.267	144.15	177.221	191.427
95.9787	0.603444	0.284576	-2.1205	0.0339638	0.270007	ENSMUSG00000037325.10	Bbs7	70.9197	61.9413	95.7651	95.9328	135.415	115.898
809.774	-0.334246	0.157453	2.12283	0.0337684	0.270007	ENSMUSG00000023092.16	Fhl1	899.262	802.544	1010.57	768.969	717.064	660.228
89.1759	0.597255	0.281351	-2.12281	0.0337699	0.270007	ENSMUSG00000027615.14	Hps3	78.0117	63.7367	70.5638	88.3988	105.424	128.92
117.443	-0.509679	0.240334	2.12071	0.0339464	0.270007	ENSMUSG00000011254.16	Thg1l	147.513	134.655	132.307	103.969	87.2474	98.9691
214.835	0.477696	0.225193	-2.12127	0.033899	0.270007	ENSMUSG00000020415.16	Pttg1	202.83	145.427	190.27	220.495	222.663	307.325
325.216	0.469835	0.221423	-2.12189	0.0338472	0.270007	ENSMUSG00000026761.12	Orc4	289.352	245.97	280.995	262.685	412.607	459.685
679.752	0.398819	0.188138	-2.11982	0.0340213	0.270293	ENSMUSG00000036777.8	Anln	513.459	643.651	599.792	624.317	961.539	735.757
135.67	0.521014	0.24607	-2.11734	0.0342308	0.271612	ENSMUSG00000002222.14	Rmnd5a	85.1036	133.757	113.406	146.662	164.498	170.591
224.834	-0.421017	0.19882	2.11758	0.0342106	0.271612	ENSMUSG00000007338.10	Mrpl49	282.26	251.356	240.673	211.454	192.671	170.591
442.728	0.413723	0.195424	-2.11705	0.0342552	0.271634	ENSMUSG00000049470.13	Aff4	388.64	386.909	361.639	385.74	612.549	520.89
60.25	-0.726571	0.343282	2.11654	0.0342986	0.271805	ENSMUSG00000075012.4	Fjx1	55.3174	76.3046	93.245	49.2221	32.7178	54.6934
274.765	-0.487617	0.230417	2.11624	0.0343248	0.271841	ENSMUSG00000045179.9	Sox3	296.444	336.638	332.658	311.405	200.851	170.591
106.022	-0.671198	0.317243	2.11572	0.0343686	0.272016	ENSMUSG00000033227.7	Wnt6	147.513	118.496	127.267	122.553	49.9855	70.3201
77.0803	0.649927	0.307288	-2.11504	0.0344265	0.272131	ENSMUSG00000010609.15	Psen2	82.2669	47.5781	51.6628	102.965	88.1562	89.8535
22.1604	-1.05828	0.500352	2.11508	0.0344235	0.272131	ENSMUSG00000072704.6	Smim10l1	25.5311	29.6241	35.2819	18.0816	12.7236	11.72
315.303	0.47362	0.224043	-2.11397	0.0345176	0.272425	ENSMUSG00000032253.13	Phip	243.964	319.581	226.812	304.373	478.043	319.045
85.6308	-0.58704	0.2777	2.11394	0.0345208	0.272425	ENSMUSG00000061410.6	Zcchc14	112.053	106.826	90.7249	79.3581	63.6179	61.2046
273.391	0.439599	0.207962	-2.11384	0.0345291	0.272425	ENSMUSG00000054611.17	Kdm2a	191.483	283.673	217.992	275.744	338.084	333.37
283.774	0.422775	0.200049	-2.11336	0.0345701	0.27248	ENSMUSG00000042515.13	Pwwp3b	245.382	231.607	249.493	263.69	381.707	330.765
289.53	-0.424818	0.201034	2.11316	0.0345871	0.27248	ENSMUSG00000008690.15	Ncaph2	323.394	359.08	315.017	301.862	209.939	227.889
30.2401	-1.31488	0.622283	2.11299	0.0346013	0.27248	ENSMUSG00000050628.6	Ubald2	53.899	38.6011	39.0621	37.67	10.9059	1.30222
17.6025	-1.25679	0.594875	2.1127	0.0346263	0.272505	ENSMUSG00000062997.6	Rpl35	29.7863	25.1356	20.1611	15.5703	4.54413	10.4178
211.329	0.468515	0.221826	-2.11209	0.034679	0.272749	ENSMUSG00000029670.12	Ing3	168.789	202.88	157.508	195.382	260.833	282.583
391.208	0.384448	0.182076	-2.11147	0.0347317	0.27282	ENSMUSG00000036167.16	Pphln1	310.628	387.807	317.537	398.297	498.037	434.943
15.3521	1.34563	0.637218	-2.11172	0.0347105	0.27282	ENSMUSG00000038602.7	Slc35f1	7.09197	13.4655	5.04027	27.6246	15.4501	23.44
149.343	-0.561947	0.266255	2.11056	0.0348102	0.273097	ENSMUSG00000037740.8	Mrps26	191.483	189.415	156.248	166.752	103.606	88.5513
354.107	0.558245	0.264502	-2.11056	0.0348106	0.273097	ENSMUSG00000019970.15	Sgk1	314.883	279.185	263.354	226.02	539.843	501.357
66.3696	-0.711048	0.336948	2.11026	0.0348358	0.273124	ENSMUSG00000067071.8	Hes6	95.0324	58.3505	95.7651	64.2901	41.806	42.9734
283.833	0.489167	0.231947	-2.10896	0.034948	0.273302	ENSMUSG00000025937.6	Lactb2	249.637	208.267	249.493	225.518	408.063	362.019
8.40492	-1.84358	0.874257	2.10873	0.0349676	0.273302	ENSMUSG00000032609.12	Klhdc8b	12.7655	16.1586	11.3406	6.52946	3.63531	0
49.7383	0.799924	0.379277	-2.10908	0.0349378	0.273302	ENSMUSG00000030805.14	Stx4a	36.8782	36.8057	34.0218	42.1904	59.9826	88.5513
405.788	0.477376	0.226344	-2.10908	0.0349379	0.273302	ENSMUSG00000029843.4	Slc13a4	370.201	272.003	375.5	335.012	608.005	474.01
155.284	0.546106	0.25888	-2.10949	0.0349023	0.273302	ENSMUSG00000093904.2	Tomm20	121.982	128.371	126.007	131.091	178.13	246.121
34.852	-0.936067	0.444256	2.10704	0.0351139	0.273875	ENSMUSG00000031480.15	Thsd1	53.899	44.885	40.3222	34.6564	23.6295	11.72
109.887	0.560105	0.265781	-2.10739	0.0350837	0.273875	ENSMUSG00000041762.16	Gpr155	97.8692	82.5885	86.9447	125.064	162.68	104.178
282.721	-0.448519	0.212884	2.10687	0.0351285	0.273875	ENSMUSG00000025577.7	Cbx2	314.883	345.615	321.317	281.269	262.651	170.591
97.9896	0.67498	0.320326	-2.10716	0.0351034	0.273875	ENSMUSG00000021514.18	Zfp369	45.3886	84.3839	95.7651	99.4487	162.68	100.271
360.974	0.403012	0.191345	-2.10621	0.0351863	0.273962	ENSMUSG00000020790.14	Ankfy1	309.21	308.809	315.017	377.202	505.308	350.299
282.532	0.414294	0.196722	-2.10599	0.0352053	0.273962	ENSMUSG00000031533.4	Mrps31	255.311	240.584	229.332	264.192	358.078	347.694
37.2228	-0.888075	0.421653	2.10617	0.0351893	0.273962	ENSMUSG00000022836.11	Mylk	26.9495	61.0436	56.703	26.1178	29.0825	23.44
88.6404	0.709668	0.337157	-2.10486	0.0353038	0.274483	ENSMUSG00000051323.16	Pcdh19	73.7565	85.2816	42.8423	111.503	148.139	70.3201
1066.27	-0.314015	0.149232	2.10421	0.0353599	0.274483	ENSMUSG00000031503.13	Col4a2	1104.93	1142.77	1299.13	953.803	1029.7	867.282
741.02	-0.361578	0.171817	2.10444	0.0353401	0.274483	ENSMUSG00000078348.4	Sf3b5	831.179	796.26	874.487	752.395	519.849	671.948
280.69	0.387567	0.184144	-2.10469	0.0353181	0.274483	ENSMUSG00000024487.5	Yipf5	236.872	230.709	263.354	331.998	330.813	290.396
658.01	0.345437	0.16428	-2.10273	0.0354892	0.275316	ENSMUSG00000078652.9	Psme3	584.378	599.664	551.91	626.326	758.87	826.913
26.9635	-0.977483	0.464978	2.10221	0.0355345	0.275497	ENSMUSG00000074218.3	Cox7a1	38.2966	26.0333	42.8423	14.5657	21.8118	18.2311
64.4572	0.660266	0.314374	-2.10026	0.0357061	0.276429	ENSMUSG00000055660.9	Mettl4	45.3886	60.1459	44.1024	85.3852	82.7032	69.0179
116.735	0.516106	0.245703	-2.10053	0.0356826	0.276429	ENSMUSG00000043542.12	Zc2hc1a	92.1956	110.417	84.4245	131.594	137.233	144.547
31.0065	2.40018	1.1429	-2.10009	0.035721	0.276429	ENSMUSG00000024659.15	Anxa1	8.51036	7.1816	13.8607	21.5974	7.27061	127.618
1115.27	-0.46923	0.223556	2.09894	0.0358224	0.277043	ENSMUSG00000039323.18	Igfbp2	1415.56	1220.87	1253.77	1376.21	711.611	713.619
185.076	-0.467464	0.222848	2.09768	0.0359334	0.27773	ENSMUSG00000001729.14	Akt1	215.596	229.811	199.091	175.793	120.874	169.289
97.8272	-0.571436	0.272594	2.09629	0.0360569	0.278512	ENSMUSG00000036825.12	Ssx2ip	117.727	125.678	105.846	61.2765	91.7915	84.6446
317.042	-0.623709	0.297628	2.0956	0.0361174	0.278807	ENSMUSG00000038146.8	Notch3	392.895	428.203	336.438	417.885	183.583	143.245
57.6612	0.738206	0.352353	-2.09507	0.0361644	0.278999	ENSMUSG00000033491.13	Prss35	55.3174	49.3735	25.2014	77.349	73.615	65.1112
182.035	-0.428807	0.204814	2.09364	0.0362922	0.279707	ENSMUSG00000063455.16	D630045J12Rik	201.412	225.323	199.091	150.68	158.136	157.569
112.203	-0.644871	0.308066	2.09329	0.0363232	0.279707	ENSMUSG00000045639.14	Zfp629	156.023	166.972	89.4648	114.517	86.3385	59.9023
61.3519	-0.672534	0.321243	2.09354	0.0363013	0.279707	ENSMUSG00000021798.14	Ldb3	65.2461	70.9183	90.7249	54.747	40.8972	45.5779
136.92	-0.643199	0.307387	2.09247	0.0363962	0.279972	ENSMUSG00000000346.9	Dazap2	197.157	119.394	187.75	158.716	79.0679	79.4357
28.7764	-1.0268	0.490729	2.0924	0.0364025	0.279972	ENSMUSG00000031574.8	Star	19.8575	40.3965	55.443	22.0997	12.7236	22.1378
183.516	0.481889	0.230431	-2.09125	0.0365058	0.280595	ENSMUSG00000047368.4	Abhd17b	161.697	136.45	160.029	172.78	204.486	265.654
59.3388	-0.758324	0.362723	2.09064	0.0365602	0.280818	ENSMUSG00000042106.5	Inka1	63.8277	97.8494	63.0034	61.7787	31.8089	37.7645
995.625	-0.363541	0.173916	2.09032	0.0365891	0.280818	ENSMUSG00000054428.12	Atpif1	1199.96	1015.3	1142.88	740.843	795.223	1079.54
174.037	-0.611436	0.292528	2.09018	0.0366021	0.280818	ENSMUSG00000034324.16	Tmem132c	229.78	226.221	177.67	208.44	83.6121	118.502
68.3079	0.719415	0.344274	-2.08966	0.0366482	0.281	ENSMUSG00000034724.18	Cnot6l	35.4599	71.816	45.3624	66.2991	85.4297	105.48
50.3528	0.767095	0.367142	-2.08937	0.0366744	0.281028	ENSMUSG00000001999.15	Blvra	29.7863	40.3965	40.3222	50.2266	55.4384	85.9468
524.809	0.38484	0.184345	-2.08761	0.0368333	0.281729	ENSMUSG00000021115.15	Vrk1	456.723	473.088	433.463	464.596	690.708	630.277
408.641	-0.389729	0.186669	2.08781	0.0368148	0.281729	ENSMUSG00000031821.11	Gins2	448.213	458.725	483.866	395.786	277.192	388.063
228.183	0.478235	0.22906	-2.08782	0.0368144	0.281729	ENSMUSG00000037148.8	Arhgap10	158.86	210.96	199.091	208.44	254.471	337.276
42.0726	-0.762077	0.365266	2.08636	0.0369457	0.281831	ENSMUSG00000031392.18	Irak1	51.0622	48.4758	59.2232	31.6428	28.1736	33.8578
553.879	0.432574	0.20737	-2.08601	0.0369779	0.281831	ENSMUSG00000032560.14	Dnajc13	451.049	544.007	417.082	484.687	826.123	600.326
137.982	-0.674757	0.323346	2.0868	0.0369064	0.281831	ENSMUSG00000020875.9	Hoxb9	136.166	196.596	178.93	172.78	71.7973	71.6224
19.6647	-1.26668	0.607246	2.08595	0.0369836	0.281831	ENSMUSG00000036040.14	Adamtsl2	35.4599	17.954	31.5017	20.5929	7.27061	5.2089
9.48986	1.94628	0.932774	-2.08656	0.0369283	0.281831	ENSMUSG00000037254.18	Itih2	4.25518	6.2839	1.26007	32.145	9.08827	3.90667
3742.64	-0.321021	0.153914	2.08572	0.0370043	0.281831	ENSMUSG00000075031.4	H2bc3	4331.78	3468.72	4672.33	3377.24	2988.22	3617.58
33.0236	0.884374	0.423923	-2.08617	0.0369634	0.281831	ENSMUSG00000041440.18	Gk5	29.7863	19.7494	20.1611	37.67	39.9884	50.7868
97.7056	0.589095	0.282525	-2.08511	0.0370592	0.282078	ENSMUSG00000032411.15	Tfdp2	79.4301	81.6908	71.8239	86.892	142.686	123.711
7.92508	1.80226	0.864603	-2.08449	0.0371155	0.282335	ENSMUSG00000030041.9	M1ap	4.25518	2.6931	3.7802	10.0453	16.3589	10.4178
565.636	0.356769	0.171216	-2.08373	0.0371849	0.282691	ENSMUSG00000001552.14	Jup	480.836	463.214	544.349	673.037	534.39	697.993
92.5437	0.596037	0.286194	-2.08264	0.0372845	0.282762	ENSMUSG00000026380.10	Tfcp2l1	62.4093	70.0206	88.2047	91.9147	137.233	105.48
469.74	0.351945	0.168978	-2.08279	0.0372707	0.282762	ENSMUSG00000022136.8	Dnajc3	425.518	429.999	380.54	463.592	547.114	571.677
18.5549	-1.15895	0.556408	2.08291	0.0372592	0.282762	ENSMUSG00000034429.15	Zfp707	25.5311	23.3402	28.9816	16.5748	9.08827	7.81335
180.793	-0.45092	0.216496	2.08281	0.0372682	0.282762	ENSMUSG00000042694.17	Stn1	182.973	238.788	204.131	148.671	170.859	139.338
152.699	0.537095	0.258038	-2.08145	0.0373923	0.283407	ENSMUSG00000036053.17	Fmnl2	114.89	157.995	98.2853	140.635	199.942	204.449
859.621	0.339663	0.163207	-2.08118	0.0374171	0.283424	ENSMUSG00000029231.15	Pdgfra	713.452	833.066	728.319	856.866	1119.67	906.349
173.46	-0.457856	0.220038	2.0808	0.0374518	0.283515	ENSMUSG00000024501.20	Dpysl3	175.881	219.039	206.651	135.11	169.951	134.129
193.708	0.459856	0.22112	-2.07967	0.0375561	0.284133	ENSMUSG00000025958.14	Creb1	134.747	166.075	186.49	196.888	216.301	261.747
556.791	0.334575	0.160913	-2.07923	0.0375964	0.284237	ENSMUSG00000028184.12	Adgrl2	476.58	526.053	473.785	581.624	688.891	593.815
166.658	-0.691941	0.33286	2.07878	0.037638	0.284237	ENSMUSG00000092116.1	Gm10320	199.994	185.824	235.633	218.988	91.7915	67.7157
4225.44	-0.332163	0.159775	2.07894	0.0376226	0.284237	ENSMUSG00000030695.16	Aldoa	4896.3	4440.03	4795.82	4455.6	3002.76	3762.13
258.319	-0.387554	0.186474	2.07833	0.0376792	0.284377	ENSMUSG00000004677.17	Myo9b	269.495	303.423	306.196	237.572	223.571	209.658
180.385	0.471826	0.227063	-2.07795	0.0377137	0.284466	ENSMUSG00000027004.3	Frzb	113.472	179.54	158.769	203.418	222.663	204.449
80.7197	0.579492	0.279373	-2.07426	0.0380551	0.286126	ENSMUSG00000028673.10	Fuca1	73.7565	60.1459	60.4832	92.417	97.2445	100.271
109.777	0.519448	0.250314	-2.07518	0.0379695	0.286126	ENSMUSG00000044252.18	Osbpl1a	87.9404	93.3609	89.4648	126.069	147.23	114.596
120.645	0.615015	0.296523	-2.07409	0.0380708	0.286126	ENSMUSG00000029263.15	Pigg	58.1542	136.45	89.4648	139.63	169.951	130.222
72.8621	-0.686404	0.330831	2.07479	0.0380059	0.286126	ENSMUSG00000096472.2	Cdkn2d	109.216	83.4862	79.3843	77.8513	48.1678	39.0667
186.916	-0.478437	0.230636	2.07443	0.0380397	0.286126	ENSMUSG00000029050.15	Ski	224.106	203.778	228.072	199.902	135.415	130.222
223.154	-0.496819	0.239536	2.07409	0.0380709	0.286126	ENSMUSG00000026857.9	Ntmt1	299.281	226.221	260.834	240.585	133.598	178.405
151.036	0.518471	0.250121	-2.07288	0.0381837	0.286802	ENSMUSG00000037234.17	Hook3	102.124	141.837	126.007	135.612	193.58	207.054
2857.26	-0.314571	0.151834	2.07181	0.0382828	0.287373	ENSMUSG00000109324.2	Prmt1	3353.08	2944.46	3209.39	3006.06	2265.7	2364.84
42.6465	-0.944515	0.455974	2.07142	0.0383193	0.287381	ENSMUSG00000063439.7	B9d2	63.8277	43.9873	63.0034	50.2266	21.8118	13.0222
107.403	-0.520458	0.25127	2.07131	0.0383297	0.287381	ENSMUSG00000026213.15	Stk11ip	121.982	126.576	131.047	93.9238	74.5238	96.3646
37.3197	-0.810505	0.391386	2.07086	0.0383723	0.28752	ENSMUSG00000026854.16	Usp20	59.5726	43.0896	40.3222	27.6246	27.2648	26.0445
588.271	0.373581	0.18042	-2.07062	0.0383942	0.28752	ENSMUSG00000026484.13	Rnf2	534.735	491.94	510.327	546.466	810.673	635.486
139.543	0.563475	0.272318	-2.06918	0.038529	0.287847	ENSMUSG00000029826.14	Zc3hav1	129.074	92.4632	115.926	113.512	202.668	183.614
177.66	0.45424	0.21952	-2.06924	0.0385232	0.287847	ENSMUSG00000075470.2	Alg10b	127.655	165.177	156.248	198.395	233.568	184.916
20.8715	-1.07654	0.520273	2.06917	0.0385298	0.287847	ENSMUSG00000027238.17	Frmd5	25.5311	35.908	22.6812	10.5476	13.6324	16.9289
69.8481	0.674982	0.326157	-2.0695	0.0384996	0.287847	ENSMUSG00000035936.6	Aldh5a1	39.715	61.0436	60.4832	85.8875	108.15	63.809
560.37	-0.359425	0.173732	2.06884	0.0385611	0.287909	ENSMUSG00000025135.12	Anapc11	659.553	544.007	686.737	516.832	419.878	535.214
155.052	-0.469694	0.227093	2.06829	0.0386131	0.287913	ENSMUSG00000012117.13	Dhdds	195.738	184.926	161.289	150.68	121.783	115.898
333.699	0.412373	0.199397	-2.0681	0.0386306	0.287913	ENSMUSG00000024539.17	Ptpn2	297.863	294.446	264.614	295.835	435.328	414.108
32.5916	1.04143	0.503518	-2.0683	0.0386119	0.287913	ENSMUSG00000039989.7	Cbx4	5.67358	34.1126	22.6812	35.1586	44.5325	53.3912
157.552	-0.502821	0.243243	2.06716	0.0387192	0.28823	ENSMUSG00000031209.14	Heph	171.626	208.267	176.409	164.743	122.692	101.574
474.801	0.402275	0.194595	-2.06724	0.0387114	0.28823	ENSMUSG00000020952.10	Scfd1	380.13	383.318	462.445	425.922	655.264	541.726
110.417	-0.578233	0.279867	2.0661	0.0388191	0.288802	ENSMUSG00000066900.11	Suds3	124.819	162.484	110.886	114.014	79.9768	70.3201
357.875	-0.453407	0.219489	2.06574	0.0388528	0.288881	ENSMUSG00000030091.17	Nup210	395.732	447.953	400.702	380.718	318.998	203.147
184.866	-0.429418	0.207965	2.06485	0.0389371	0.289113	ENSMUSG00000038622.8	Med30	218.433	207.369	211.691	173.784	139.05	158.871
971.703	0.33299	0.16128	-2.06467	0.0389541	0.289113	ENSMUSG00000029817.11	Tra2a	892.17	806.135	880.787	905.084	1228.73	1117.31
168.306	0.453185	0.21952	-2.06444	0.0389764	0.289113	ENSMUSG00000035365.15	Parpbp	148.931	136.45	139.868	165.748	202.668	216.169
546.85	0.342723	0.165972	-2.06495	0.0389278	0.289113	ENSMUSG00000040738.10	Ints8	465.233	496.428	482.606	524.366	665.261	647.206
578.433	0.404095	0.19583	-2.0635	0.0390656	0.289603	ENSMUSG00000052681.8	Rap1b	512.04	467.702	511.587	479.664	705.25	794.357
103.593	0.583944	0.28306	-2.06297	0.0391157	0.289632	ENSMUSG00000062232.14	Rapgef2	102.124	93.3609	52.9228	122.051	120.874	130.222
318.949	0.410759	0.199095	-2.06314	0.0390998	0.289632	ENSMUSG00000048327.6	Ckap2l	262.403	285.469	270.915	284.283	392.613	418.014
30.9276	-0.975269	0.472821	2.06266	0.039145	0.289678	ENSMUSG00000040174.14	Alkbh3	22.6943	43.0896	56.703	22.0997	13.6324	27.3467
1056.7	0.419001	0.203195	-2.06206	0.0392023	0.28993	ENSMUSG00000012443.4	Kif11	897.843	1006.32	806.443	864.902	1591.36	1173.3
3437.45	-0.463416	0.224924	2.06032	0.0393679	0.290983	ENSMUSG00000029581.14	Fscn1	4242.42	3799.97	3917.55	4356.66	2276.61	2031.47
99.7214	-0.615153	0.298692	2.05949	0.0394472	0.291397	ENSMUSG00000031167.16	Rbm3	156.023	88.8724	119.706	100.453	68.162	65.1112
36.0462	0.840463	0.408201	-2.05895	0.0394993	0.29161	ENSMUSG00000052085.7	Dock8	19.8575	27.8287	28.9816	38.1722	45.4413	55.9957
29.8263	-0.939818	0.456597	2.05831	0.0395604	0.291889	ENSMUSG00000042073.15	Abhd14b	43.9702	32.3172	42.8423	28.6292	18.1765	13.0222
14.3039	1.48528	0.72219	-2.05663	0.0397216	0.292415	ENSMUSG00000031343.13	Gabra3	7.09197	6.2839	8.82047	11.0499	10.9059	41.6712
373.628	0.479042	0.23295	-2.05641	0.0397427	0.292415	ENSMUSG00000017548.15	Suz12	273.75	349.206	309.977	280.767	488.949	539.121
69.6216	-0.759041	0.369043	2.05678	0.039707	0.292415	ENSMUSG00000034343.14	Ube2f	92.1956	79.8954	93.245	83.8784	37.2619	31.2534
283.899	0.442617	0.215244	-2.05635	0.0397485	0.292415	ENSMUSG00000025337.10	Sbds	260.985	255.845	202.871	249.124	351.716	382.854
6.9168	1.98048	0.962943	-2.05669	0.039716	0.292415	ENSMUSG00000069733.11	Ube2u	2.83679	1.7954	3.7802	5.52493	14.5412	13.0222
196.764	0.490378	0.238846	-2.05312	0.0400613	0.29451	ENSMUSG00000004040.16	Stat3	171.626	139.144	180.19	177.3	293.551	218.774
205.622	0.48211	0.234841	-2.05292	0.0400803	0.29451	ENSMUSG00000026565.18	Pou2f1	154.605	217.244	141.128	212.459	290.825	217.472
12.3404	1.41639	0.690181	-2.0522	0.0401502	0.294636	ENSMUSG00000019368.13	Sec14l4	5.67358	8.97701	5.04027	15.068	14.5412	24.7423
682.641	0.416253	0.202851	-2.05202	0.0401681	0.294636	ENSMUSG00000021500.17	Ddx46	594.307	628.39	531.749	677.055	1049.69	614.65
437.471	-0.461497	0.224867	2.05231	0.0401393	0.294636	ENSMUSG00000022956.11	Atp5o	540.408	482.065	502.767	515.325	319.907	264.352
239.177	-0.434184	0.21171	2.05085	0.040282	0.295126	ENSMUSG00000027079.15	Clp1	251.056	265.719	309.977	218.988	231.751	157.569
89.5012	-0.644703	0.314336	2.051	0.040267	0.295126	ENSMUSG00000051839.7	Gypa	107.798	85.2816	134.827	56.2538	98.1533	54.6934
533.159	0.451797	0.220326	-2.05059	0.0403073	0.295139	ENSMUSG00000036782.13	Klhl13	425.518	465.009	457.405	393.777	718.882	738.362
127.112	-0.571623	0.278886	2.04967	0.0403969	0.295595	ENSMUSG00000022556.11	Hsf1	133.329	164.279	157.508	115.019	63.6179	128.92
15.9131	-1.17275	0.572222	2.04946	0.0404168	0.295595	ENSMUSG00000039616.10	Mocos	22.6943	20.6471	22.6812	9.04079	9.99709	10.4178
550.369	0.427074	0.208554	-2.04779	0.0405808	0.296175	ENSMUSG00000027478.15	Dnmt3b	581.542	439.873	389.361	626.326	780.682	484.428
6853.16	-0.301252	0.147104	2.04788	0.0405713	0.296175	ENSMUSG00000030744.13	Rps3	8382.71	6900.62	7419.28	7056.34	5582.01	5777.97
207.833	-0.434593	0.212166	2.04836	0.0405248	0.296175	ENSMUSG00000028955.3	Vamp3	217.014	244.175	255.794	198.897	143.595	187.52
280.99	0.481679	0.235231	-2.04769	0.0405907	0.296175	ENSMUSG00000020380.16	Rad50	212.759	259.435	229.332	230.038	435.328	319.045
253.646	0.50396	0.246269	-2.04638	0.040719	0.296938	ENSMUSG00000037531.8	Mrpl47	215.596	191.21	220.512	189.857	324.451	380.25
65.9753	-0.651008	0.318164	2.04614	0.0407431	0.296941	ENSMUSG00000021143.10	Pacs2	75.1749	74.5092	90.7249	43.1949	44.5325	67.7157
12.7269	1.67528	0.819064	-2.04536	0.0408191	0.297012	ENSMUSG00000029816.10	Gpnmb	2.83679	7.1816	7.56041	8.53852	7.27061	42.9734
97.3401	-0.622897	0.304539	2.04538	0.0408178	0.297012	ENSMUSG00000004931.11	Apba3	130.492	117.599	107.106	100.453	46.3502	82.0402
578.647	0.366506	0.179193	-2.04531	0.040824	0.297012	ENSMUSG00000026374.14	Tsn	547.5	459.623	507.807	542.95	635.27	778.731
188.589	-0.566143	0.277032	2.0436	0.0409928	0.297844	ENSMUSG00000061393.14	Acvr2b	229.78	233.402	215.472	231.042	107.242	114.596
113.392	-0.61091	0.298955	2.04348	0.0410048	0.297844	ENSMUSG00000027952.16	Pmvk	147.513	87.077	178.93	108.992	83.6121	74.2268
82.9302	0.625234	0.305977	-2.0434	0.0410126	0.297844	ENSMUSG00000035649.17	Zcchc7	53.899	68.2252	71.8239	73.8331	100.88	128.92
2128.22	0.352226	0.17239	-2.04319	0.0410335	0.297844	ENSMUSG00000068882.13	Ssb	1811.29	1904.02	1891.36	1821.22	2912.79	2428.65
747.283	0.374885	0.183619	-2.04165	0.0411861	0.298773	ENSMUSG00000032777.9	Gtf3c1	599.981	749.58	602.312	829.241	1021.52	681.064
48.4057	0.755498	0.370085	-2.04142	0.0412092	0.298773	ENSMUSG00000028005.13	Gucy1b1	29.7863	43.0896	34.0218	45.204	74.5238	63.809
944.386	-0.40821	0.20004	2.04064	0.0412867	0.299162	ENSMUSG00000018583.5	G3bp1	1130.46	1162.52	942.531	1038.18	817.035	575.583
16.9	1.50207	0.736183	-2.04035	0.0413159	0.2992	ENSMUSG00000031304.18	Il2rg	2.83679	4.4885	18.901	15.5703	12.7236	46.8801
11927.2	0.325878	0.159817	-2.03907	0.0414434	0.299258	ENSMUSG00000020048.13	Hsp90b1	10351.4	10697	10706.8	10563.2	16090.8	13153.8
380.184	0.383946	0.188235	-2.03972	0.0413785	0.299258	ENSMUSG00000026827.12	Gpd2	340.415	324.968	325.097	403.822	523.484	363.321
371.674	-0.449447	0.220375	2.03946	0.0414037	0.299258	ENSMUSG00000002968.9	Med25	381.548	440.771	467.485	419.392	231.751	289.094
53.1913	-1.81896	0.891764	2.03973	0.041377	0.299258	ENSMUSG00000063316.13	Rpl27	60.9909	42.1919	146.168	45.204	6.36179	18.2311
184.106	-0.449676	0.220511	2.03924	0.0414256	0.299258	ENSMUSG00000026659.13	Dusp12	231.198	168.768	239.413	164.241	149.956	151.058
318.58	0.413523	0.202905	-2.03801	0.0415485	0.299843	ENSMUSG00000038446.8	Cdc40	286.516	272.003	259.574	280.265	428.966	384.156
501.16	0.323462	0.158739	-2.0377	0.0415798	0.299897	ENSMUSG00000035704.17	Alg8	446.794	433.589	454.884	519.845	597.099	554.748
398.075	0.391414	0.192191	-2.03658	0.0416918	0.300194	ENSMUSG00000035851.14	Ythdc1	320.557	375.239	335.178	366.152	540.752	450.57
9.47062	1.97743	0.970867	-2.03677	0.0416732	0.300194	ENSMUSG00000000440.12	Pparg	2.83679	4.4885	3.7802	6.52946	2.72648	36.4623
226.918	0.500619	0.245815	-2.03657	0.0416929	0.300194	ENSMUSG00000027115.14	Kif18a	207.086	179.54	175.149	176.295	283.554	339.881
162.268	0.470887	0.231277	-2.03603	0.0417475	0.300414	ENSMUSG00000045980.13	Tmem104	163.115	130.167	115.926	185.838	214.483	164.08
76.9802	-0.620963	0.30514	2.03501	0.0418497	0.300963	ENSMUSG00000035941.15	Ibtk	96.4508	97.8494	84.4245	44.7017	77.2503	61.2046
126.317	0.492073	0.241878	-2.03438	0.041913	0.300963	ENSMUSG00000031555.15	Adam9	104.961	109.519	99.5453	145.657	126.327	171.894
181.391	-0.5635	0.277007	2.03424	0.041927	0.300963	ENSMUSG00000042737.9	Dpm3	234.035	208.267	207.911	191.866	80.8856	165.383
29.6143	0.972416	0.478027	-2.03423	0.0419285	0.300963	ENSMUSG00000086040.8	Wipf3	19.8575	21.5448	17.6409	25.1133	33.6266	59.9023
90.5957	0.626258	0.307883	-2.03408	0.041944	0.300963	ENSMUSG00000019971.10	Cep290	60.9909	78.1	73.0839	73.3309	140.868	117.2
451.873	0.430468	0.211683	-2.03355	0.0419972	0.301173	ENSMUSG00000019302.16	Atp6v0a1	364.527	368.057	422.123	417.885	699.797	438.85
1139.14	0.381506	0.187647	-2.03311	0.0420418	0.301319	ENSMUSG00000025001.11	Hells	970.182	950.665	1045.86	959.831	1638.61	1269.67
119.309	0.496759	0.244409	-2.03249	0.0421037	0.301418	ENSMUSG00000032342.13	Mto1	97.8692	92.4632	105.846	123.055	139.05	157.569
118.186	-0.529762	0.260635	2.03258	0.0420951	0.301418	ENSMUSG00000029577.13	Ube3b	147.513	138.246	134.827	121.548	74.5238	92.458
24.8052	1.10334	0.542937	-2.03217	0.0421364	0.30148	ENSMUSG00000044501.17	Zfp758	18.4391	14.3632	13.8607	16.5748	30.9001	54.6934
187.451	-0.447945	0.220492	2.03157	0.042197	0.301741	ENSMUSG00000047284.14	Neurl4	229.78	210.062	211.691	193.875	139.959	139.338
223.169	0.534688	0.263305	-2.03068	0.0422871	0.302041	ENSMUSG00000018160.15	Med1	139.003	247.765	156.248	194.377	261.742	339.881
426.926	0.478341	0.235541	-2.03082	0.0422734	0.302041	ENSMUSG00000040407.18	Akap9	337.578	446.157	283.515	339.03	625.273	530.006
700.626	-0.316282	0.15577	2.03044	0.0423118	0.302044	ENSMUSG00000021326.13	Trim27	763.096	763.943	803.923	649.43	546.205	677.157
164.168	0.455939	0.224632	-2.02971	0.0423858	0.3024	ENSMUSG00000029189.10	Sel1l3	123.4	134.655	156.248	163.739	209.03	197.938
30.1433	-0.940579	0.463562	2.02902	0.0424559	0.302728	ENSMUSG00000024462.17	Gabbr1	29.7863	37.7034	50.4027	18.0816	13.6324	31.2534
164.841	-0.624229	0.30775	2.02836	0.0425233	0.302897	ENSMUSG00000044876.15	Zfp444	194.32	217.244	191.53	211.454	87.2474	87.2491
118.218	-0.5688	0.28043	2.02832	0.042528	0.302897	ENSMUSG00000071172.13	Srsf3	140.421	168.768	115.926	108.992	112.695	62.5068
76.0447	-0.69598	0.343181	2.02803	0.0425576	0.302936	ENSMUSG00000011257.19	Pabpc4	90.7772	118.496	74.344	72.3263	69.0708	31.2534
1208.04	-0.322825	0.159216	2.02759	0.0426023	0.302944	ENSMUSG00000028964.14	Park7	1388.61	1260.37	1383.55	1256.67	1048.79	910.255
229.078	0.4576	0.225692	-2.02754	0.0426071	0.302944	ENSMUSG00000021639.17	Gtf2h2	199.994	204.676	172.629	196.888	318.998	281.281
12.2974	-1.63008	0.804292	2.02673	0.0426904	0.303363	ENSMUSG00000038930.11	Rccd1	2.83679	18.8517	34.0218	7.53399	2.72648	7.81335
227.144	-0.418405	0.206766	2.02357	0.0430148	0.304841	ENSMUSG00000048537.16	Phldb1	268.076	258.538	254.534	229.033	159.954	192.729
63.9994	-0.686367	0.339156	2.02375	0.0429957	0.304841	ENSMUSG00000003346.14	Abhd17a	66.6645	87.077	84.4245	67.8059	36.3531	41.6712
25.9288	1.01252	0.500378	-2.02352	0.04302	0.304841	ENSMUSG00000038702.6	Dsel	11.3472	27.8287	11.3406	33.1496	35.4442	36.4623
342.629	0.362885	0.179271	-2.02422	0.0429478	0.304841	ENSMUSG00000047187.9	Rab2a	296.444	295.344	306.196	335.012	421.696	401.085
25.026	-1.10486	0.546006	2.02353	0.0430182	0.304841	ENSMUSG00000067261.4	Foxd3	29.7863	44.885	28.9816	22.602	19.9942	3.90667
154.074	-0.475485	0.235018	2.02318	0.0430542	0.304911	ENSMUSG00000011877.13	Git1	175.881	195.699	167.589	157.712	109.059	118.502
785.251	0.353611	0.174832	-2.02258	0.043117	0.30501	ENSMUSG00000022024.10	Sugt1	720.544	642.754	703.118	691.621	953.359	1000.11
166.208	0.449131	0.22205	-2.02266	0.0431085	0.30501	ENSMUSG00000002413.15	Braf	137.584	140.939	142.388	165.246	223.571	187.52
40.7512	0.84251	0.416628	-2.02221	0.0431546	0.305074	ENSMUSG00000034480.18	Diaph2	24.1127	32.3172	30.2416	32.6473	71.7973	53.3912
131.779	0.514147	0.254338	-2.02151	0.0432269	0.305074	ENSMUSG00000037110.20	Ralgapa2	97.8692	111.315	114.666	116.526	174.495	175.8
21.8539	-1.03832	0.51353	2.02192	0.0431847	0.305074	ENSMUSG00000050910.5	Cdr2l	31.2047	35.0103	22.6812	19.0861	12.7236	10.4178
82.143	0.555246	0.274696	-2.02131	0.0432478	0.305074	ENSMUSG00000045140.8	Pigw	66.6645	64.6344	68.0437	94.426	93.6092	105.48
148.528	0.701238	0.346882	-2.02155	0.043223	0.305074	ENSMUSG00000046230.11	Vps13a	100.706	141.837	94.5051	77.8513	244.474	231.796
416.776	-0.34345	0.170022	2.02003	0.0433798	0.305833	ENSMUSG00000042487.6	Leo1	516.295	428.203	456.144	379.211	383.525	337.276
38.6007	-0.829196	0.410598	2.01948	0.0434368	0.30589	ENSMUSG00000066877.11	Nck2	58.1542	54.7597	36.542	37.1677	25.4471	19.5334
539.099	0.327279	0.162055	-2.01956	0.0434291	0.30589	ENSMUSG00000027006.13	Dnajc10	490.764	452.441	490.166	537.927	604.37	658.926
493.026	-0.363053	0.179814	2.01904	0.0434826	0.30604	ENSMUSG00000050856.16	Atp5k	544.663	515.28	607.353	514.823	376.254	399.783
42.9916	0.776461	0.384693	-2.01839	0.0435506	0.306347	ENSMUSG00000040918.12	Slc19a2	31.2047	26.931	36.542	46.2085	45.4413	71.6224
416.369	0.458068	0.226985	-2.01805	0.0435859	0.306351	ENSMUSG00000033943.15	Mga	283.679	405.761	360.379	344.052	631.635	472.708
25.5375	-1.02738	0.509131	2.01792	0.0436001	0.306351	ENSMUSG00000037621.8	Atoh8	24.1127	30.5218	49.1426	24.611	11.8147	13.0222
29.1785	-0.960451	0.476319	2.0164	0.0437579	0.306942	ENSMUSG00000070493.3	Chchd2	31.2047	47.5781	37.802	30.136	12.7236	15.6267
37.1453	0.917523	0.454942	-2.01679	0.0437173	0.306942	ENSMUSG00000038192.5	Cer1	35.4599	14.3632	27.7215	30.136	61.8002	53.3912
118.593	0.503925	0.249899	-2.01652	0.0437457	0.306942	ENSMUSG00000055900.14	Tmem69	96.4508	93.3609	103.326	118.535	134.506	165.383
27.5871	1.06873	0.530149	-2.01591	0.0438097	0.306962	ENSMUSG00000009628.14	Tex15	18.4391	21.5448	12.6007	16.0725	49.9855	46.8801
13.714	1.42955	0.709082	-2.01606	0.0437941	0.306962	ENSMUSG00000056019.12	Zfp709	1.41839	8.97701	11.3406	12.0544	26.356	22.1378
32.8605	0.874771	0.434032	-2.01545	0.0438572	0.307123	ENSMUSG00000032908.9	Sgpp2	17.0207	22.4425	30.2416	42.1904	52.7119	32.5556
10.1971	1.54908	0.7687	-2.01519	0.0438843	0.307141	ENSMUSG00000027376.15	Prom2	5.67358	7.1816	2.52014	17.5793	9.99709	18.2311
199.518	-0.549573	0.272763	2.01484	0.0439218	0.307232	ENSMUSG00000004996.9	Mri1	282.26	183.131	249.493	232.549	118.147	131.525
244.148	0.466488	0.231781	-2.01262	0.0441548	0.308545	ENSMUSG00000038535.17	Zfp280d	197.157	238.788	176.409	205.427	337.175	309.93
207.681	0.460276	0.228704	-2.01254	0.0441633	0.308545	ENSMUSG00000030850.17	Ate1	178.718	151.711	192.79	183.327	251.745	287.792
278.929	0.377322	0.187503	-2.01235	0.0441834	0.308545	ENSMUSG00000028741.13	Mrto4	239.709	248.663	238.153	275.744	344.445	326.858
13.98	1.2662	0.629326	-2.012	0.0442198	0.308627	ENSMUSG00000037960.11	Card19	9.92876	7.1816	7.56041	17.077	19.9942	22.1378
177.877	0.57348	0.285245	-2.01049	0.0443797	0.30957	ENSMUSG00000020492.11	Ska2	150.35	149.018	127.267	119.539	237.204	283.885
151.485	-0.446271	0.222064	2.00966	0.0444676	0.309737	ENSMUSG00000034354.17	Mtmr3	168.789	174.154	182.71	144.15	124.509	114.596
381.327	0.380929	0.189516	-2.01001	0.0444299	0.309737	ENSMUSG00000029701.15	Rbm28	347.507	329.456	316.277	363.641	523.484	407.596
920.155	-0.3193	0.158891	2.00956	0.0444779	0.309737	ENSMUSG00000004929.12	Thop1	1109.18	976.698	982.853	924.17	826.123	701.899
141.315	-0.52481	0.261305	2.00841	0.0445992	0.309917	ENSMUSG00000045752.13	Tssc4	147.513	169.665	183.97	145.657	79.9768	121.107
371.731	0.41052	0.204403	-2.00838	0.0446028	0.309917	ENSMUSG00000051257.3	Trap1a	313.465	278.287	364.16	330.491	433.51	510.472
272.925	-0.439297	0.218682	2.00884	0.0445543	0.309917	ENSMUSG00000030403.9	Vasp	314.883	297.139	332.658	292.821	170.859	229.192
345.34	0.362133	0.180272	-2.00882	0.0445567	0.309917	ENSMUSG00000022204.9	Ngdn	344.67	280.98	280.995	361.129	386.251	418.014
198.16	-0.547456	0.272703	2.00752	0.0446944	0.31021	ENSMUSG00000056895.4	H2bu2	263.821	223.527	221.772	238.074	106.333	135.431
307.111	0.391919	0.195204	-2.00774	0.0446714	0.31021	ENSMUSG00000026305.15	Lrrfip1	290.771	230.709	277.215	333.002	406.246	304.721
18.9251	-1.10533	0.550814	2.00671	0.0447802	0.310633	ENSMUSG00000037206.15	Islr	31.2047	24.2379	22.6812	12.5567	16.3589	6.51112
55.8014	0.736273	0.367338	-2.00435	0.0450326	0.311091	ENSMUSG00000024924.14	Vldlr	34.0415	59.2482	31.5017	84.3807	52.7119	72.9246
80.9977	0.706164	0.352417	-2.00377	0.0450943	0.311091	ENSMUSG00000018362.14	Kpna2	49.6438	59.2482	74.344	53.7425	122.692	126.316
469.561	0.413017	0.206036	-2.00459	0.0450067	0.311091	ENSMUSG00000035133.9	Arhgap5	354.599	476.679	374.24	414.37	666.17	531.308
17.3682	-1.20566	0.601307	2.00507	0.0449553	0.311091	ENSMUSG00000021986.9	Amer2	38.2966	22.4425	12.6007	13.0589	9.99709	7.81335
333.606	0.364264	0.181685	-2.00492	0.0449712	0.311091	ENSMUSG00000031438.11	Rnf128	316.302	246.868	313.757	377.202	378.981	368.53
37.6192	-0.866983	0.432676	2.00377	0.0450947	0.311091	ENSMUSG00000079560.13	Hoxa3	43.9702	52.9643	49.1426	35.6609	12.7236	31.2534
10.7199	1.65777	0.826877	-2.00486	0.0449777	0.311091	ENSMUSG00000022906.15	Parp9	2.83679	3.5908	8.82047	10.5476	7.27061	31.2534
92.2551	0.525089	0.261836	-2.00541	0.0449192	0.311091	ENSMUSG00000015027.11	Galns	70.9197	79.8954	75.6041	107.485	106.333	113.294
256.17	-0.372032	0.185552	2.005	0.0449633	0.311091	ENSMUSG00000040940.18	Arhgef1	302.118	292.65	273.435	234.558	227.207	207.054
81.6393	-0.576588	0.287723	2.00397	0.0450736	0.311091	ENSMUSG00000041995.8	Zbed3	89.3588	84.3839	119.706	68.8105	57.2561	70.3201
112.27	0.557923	0.278501	-2.00331	0.0451441	0.311261	ENSMUSG00000031600.11	Vps37a	86.522	106.826	76.8641	97.9419	142.686	162.778
12.034	-1.38898	0.693717	2.00223	0.0452599	0.311887	ENSMUSG00000029869.7	Ephb6	11.3472	26.0333	15.1208	9.04079	5.45296	5.2089
912.13	0.299733	0.149767	-2.00133	0.0453572	0.312351	ENSMUSG00000028729.15	Ebna1bp2	809.903	836.657	803.923	894.034	1027.88	1100.38
8.97878	-1.79565	0.897313	2.00114	0.045377	0.312351	ENSMUSG00000074261.3	Erich4	7.09197	11.6701	23.9413	7.53399	3.63531	0
153.067	0.52321	0.261521	-2.00064	0.0454315	0.312468	ENSMUSG00000041685.16	Fcho2	120.563	131.064	123.487	122.051	227.207	194.032
99.688	-0.709822	0.354851	2.00034	0.0454636	0.312468	ENSMUSG00000003345.16	Csnk1g2	89.3588	146.325	132.307	51.2311	49.9855	128.92
141.127	-1.20941	0.604616	2.00029	0.0454689	0.312468	ENSMUSG00000033272.12	Slc35a4	198.575	210.062	183.97	157.712	59.9826	36.4623
153.023	0.453922	0.226987	-1.99977	0.0455247	0.312567	ENSMUSG00000005882.18	Uqcc1	153.187	121.19	113.406	165.246	185.401	179.707
163.5	-0.472515	0.236294	1.99969	0.0455332	0.312567	ENSMUSG00000040711.8	Sh3pxd2b	175.881	167.87	228.072	162.232	115.421	131.525
108.623	0.54824	0.274209	-1.99935	0.0455701	0.312649	ENSMUSG00000039431.16	Mtmr7	86.522	94.2586	83.1645	102.462	168.133	117.2
131.044	0.485012	0.242665	-1.99869	0.0456417	0.312807	ENSMUSG00000026663.6	Atf6	104.961	106.826	115.926	138.625	184.492	135.431
87.8108	-0.648565	0.324572	1.99822	0.0456931	0.312807	ENSMUSG00000000552.10	Zfp385a	93.614	100.542	129.787	100.453	49.0766	53.3912
1070.38	0.342983	0.171625	-1.99845	0.0456682	0.312807	ENSMUSG00000006273.14	Atp6v1b2	1038.26	879.747	913.549	1017.09	1464.12	1109.5
62.895	0.644014	0.322246	-1.99852	0.0456608	0.312807	ENSMUSG00000029179.14	Zcchc4	49.6438	52.0666	45.3624	84.883	58.1649	87.2491
55.7793	-0.702416	0.351583	1.99787	0.0457312	0.312896	ENSMUSG00000037339.17	Fam53a	63.8277	81.6908	63.0034	57.7606	34.5354	33.8578
966.229	-0.359277	0.179857	1.99758	0.0457627	0.312941	ENSMUSG00000035754.8	Wdr18	1158.83	977.596	1126.5	1049.74	808.856	675.855
833.538	0.381082	0.19094	-1.99582	0.0459533	0.313315	ENSMUSG00000000278.10	Scpep1	751.749	685.843	733.359	697.145	1185.11	948.02
139.385	-0.469011	0.234914	1.99652	0.0458771	0.313315	ENSMUSG00000032077.5	Bud13	180.136	163.382	143.648	134.607	109.059	105.48
401.335	-0.372848	0.186778	1.99621	0.045911	0.313315	ENSMUSG00000036667.14	Tcaf1	438.284	486.554	435.983	380.718	391.704	274.769
976.73	-0.334539	0.167691	1.99497	0.0460463	0.313315	ENSMUSG00000006398.15	Cdc20	1065.21	1056.59	1150.44	971.885	935.183	681.064
414.13	0.39065	0.195837	-1.99477	0.0460677	0.313315	ENSMUSG00000034269.12	Setd5	331.904	421.919	317.537	391.265	463.502	558.654
35.0192	0.912033	0.457186	-1.99488	0.0460558	0.313315	ENSMUSG00000092416.2	Zfp141	21.2759	37.7034	12.6007	35.1586	49.9855	53.3912
111.048	-0.495691	0.248246	1.99677	0.0458497	0.313315	ENSMUSG00000019997.11	Ccn2	110.635	139.144	139.868	96.9374	87.2474	92.458
10.0058	-1.48482	0.743912	1.99596	0.0459385	0.313315	ENSMUSG00000035948.13	Acss3	14.1839	15.2609	15.1208	7.53399	2.72648	5.2089
100.234	0.570178	0.285708	-1.99567	0.04597	0.313315	ENSMUSG00000034653.11	Ythdc2	90.7772	80.7931	70.5638	99.951	159.045	100.271
15.7178	1.24213	0.62254	-1.99527	0.0460138	0.313315	ENSMUSG00000030256.11	Bhlhe41	14.1839	8.97701	5.04027	24.611	15.4501	26.0445
23.7683	-1.05954	0.531432	1.99374	0.0461804	0.313401	ENSMUSG00000048758.14	Rpl29	41.1334	26.0333	30.2416	23.6065	7.27061	14.3245
61.4161	-0.651061	0.326516	1.99396	0.0461561	0.313401	ENSMUSG00000033760.17	Rbm4b	78.0117	81.6908	66.7836	57.2583	50.8943	33.8578
9.13903	-1.70274	0.853855	1.99418	0.0461322	0.313401	ENSMUSG00000021871.19	Gm49342	9.92876	9.87471	22.6812	7.53399	0.908827	3.90667
125.314	-2.63745	1.32261	1.99413	0.0461383	0.313401	ENSMUSG00000073702.11	Rpl31	188.646	331.252	128.527	92.9192	2.72648	7.81335
146.268	-0.583765	0.292998	1.99239	0.0463284	0.314065	ENSMUSG00000020190.13	Mknk2	148.931	208.267	171.369	174.789	81.7944	92.458
8.93407	-1.66778	0.837057	1.99243	0.0463235	0.314065	ENSMUSG00000096753.7	Fam181a	11.3472	18.8517	11.3406	8.03626	2.72648	1.30222
297.995	0.360909	0.181184	-1.99195	0.0463763	0.314219	ENSMUSG00000038518.15	Jarid2	272.332	275.594	234.373	323.459	355.351	326.858
750.272	0.315858	0.15861	-1.99141	0.0464363	0.314379	ENSMUSG00000037242.8	Clic4	685.084	641.856	679.176	777.508	958.812	759.197
15.0753	-1.33754	0.672007	1.99037	0.0465505	0.314379	ENSMUSG00000071713.6	Csf2rb	18.4391	22.4425	22.6812	5.02266	3.63531	18.2311
1010.53	0.349046	0.175362	-1.99043	0.0465434	0.314379	ENSMUSG00000027002.13	Nckap1	814.158	920.143	928.67	873.441	1232.37	1294.41
247.269	-0.406181	0.204071	1.99039	0.0465475	0.314379	ENSMUSG00000038256.15	Bcl9	279.424	317.786	249.493	248.119	190.854	197.938
373.669	0.382438	0.192094	-1.99089	0.0464935	0.314379	ENSMUSG00000117621.1	Hspe1-rs1	296.444	373.443	301.156	363.641	497.128	410.201
795.448	0.298865	0.150094	-1.99118	0.046461	0.314379	ENSMUSG00000042942.18	Greb1l	714.871	780.102	643.895	866.409	898.83	868.584
41.1676	0.793794	0.398958	-1.98967	0.0466272	0.314388	ENSMUSG00000001510.8	Dlx3	32.6231	27.8287	30.2416	62.7833	33.6266	59.9023
3449.78	-1.03968	0.522493	1.98985	0.0466071	0.314388	ENSMUSG00000049932.3	H2ax	5124.66	3747.9	5054.13	3832.79	1525.01	1414.22
864.682	-0.374876	0.188398	1.98981	0.0466121	0.314388	ENSMUSG00000002984.17	Tomm40	1034.01	950.665	948.831	984.442	621.637	648.508
33.474	-0.89674	0.450874	1.98889	0.0467132	0.314798	ENSMUSG00000027368.6	Dusp2	56.7358	29.6241	45.3624	31.1405	14.5412	23.44
237.505	0.389428	0.195824	-1.98866	0.0467382	0.314798	ENSMUSG00000018604.18	Tbx3	195.738	205.573	216.732	285.789	288.098	233.098
6.63078	2.00784	1.01019	-1.98758	0.0468582	0.315353	ENSMUSG00000023403.14	Stk31	2.83679	3.5908	1.26007	4.01813	16.3589	11.72
679.763	-0.330154	0.166152	1.98706	0.046916	0.315353	ENSMUSG00000058290.4	Espl1	771.606	835.759	665.316	625.321	657.082	523.494
169.104	0.464617	0.233827	-1.98701	0.0469214	0.315353	ENSMUSG00000021669.15	Col4a3bp	131.911	136.45	156.248	152.187	209.939	227.889
193.114	-0.402755	0.202692	1.98703	0.0469194	0.315353	ENSMUSG00000036327.18	Qsox2	236.872	214.55	209.171	177.3	155.409	165.383
68.4891	0.616786	0.310463	-1.98667	0.0469594	0.315439	ENSMUSG00000056692.13	Ilrun	39.715	64.6344	56.703	81.8694	78.1591	89.8535
21.2009	-1.04486	0.526225	1.98558	0.0470796	0.315689	ENSMUSG00000053441.5	Adamts19	31.2047	35.0103	20.1611	18.0816	13.6324	9.11557
384.779	0.512822	0.258228	-1.98593	0.0470414	0.315689	ENSMUSG00000045330.8	4933402E13Rik	310.628	276.492	362.899	258.165	613.458	487.032
20.7252	1.44273	0.726646	-1.98547	0.0470922	0.315689	ENSMUSG00000032446.14	Eomes	19.8575	10.7724	2.52014	7.03173	28.1736	55.9957
16.272	-1.1858	0.597252	1.98542	0.0470975	0.315689	ENSMUSG00000053746.8	Ptrh1	32.6231	17.0563	18.901	13.0589	8.17944	7.81335
372.064	0.386943	0.194916	-1.98518	0.0471243	0.3157	ENSMUSG00000069539.11	Scyl2	286.516	351.001	327.618	344.052	502.581	420.619
10.5267	-1.62094	0.817248	1.98341	0.0473217	0.316187	ENSMUSG00000041476.12	Smpx	8.51036	24.2379	13.8607	3.0136	1.81765	11.72
404.522	0.331619	0.167199	-1.98338	0.0473252	0.316187	ENSMUSG00000019978.16	Epb41l2	357.435	381.523	335.178	438.981	481.678	432.339
323.342	-0.364706	0.183901	1.98317	0.0473484	0.316187	ENSMUSG00000026842.16	Abl1	350.343	401.272	341.478	319.441	264.469	263.049
703.121	-0.403271	0.203327	1.98336	0.0473273	0.316187	ENSMUSG00000030120.14	Mlf2	852.455	819.601	734.619	818.192	519.849	474.01
1154.41	0.313925	0.158251	-1.98371	0.0472884	0.316187	ENSMUSG00000026245.16	Farsb	1070.89	978.494	1037.04	1063.3	1434.13	1342.59
140.838	0.47574	0.23985	-1.98349	0.0473131	0.316187	ENSMUSG00000036291.6	Ap5m1	131.911	105.031	115.926	136.114	167.224	188.823
25.9398	-1.2495	0.630147	1.98288	0.0473809	0.316234	ENSMUSG00000071637.5	Cebpd	53.899	26.0333	31.5017	33.1496	4.54413	6.51112
132.371	-0.512385	0.258563	1.98166	0.0475172	0.316499	ENSMUSG00000061111.8	Mcrip1	180.136	146.325	141.128	126.069	78.1591	122.409
77.6637	-0.607348	0.306522	1.98141	0.0475448	0.316499	ENSMUSG00000048696.11	Mex3d	80.8485	98.7471	103.326	80.8649	52.7119	49.4845
76.3654	0.594619	0.300096	-1.98143	0.047543	0.316499	ENSMUSG00000028385.14	Snx30	66.6645	70.0206	45.3624	84.3807	104.515	87.2491
38.3842	-0.866351	0.437242	1.9814	0.0475469	0.316499	ENSMUSG00000045411.16	2410002F23Rik	58.1542	37.7034	54.1829	39.679	14.5412	26.0445
81.3479	-0.581735	0.293548	1.98174	0.0475086	0.316499	ENSMUSG00000045193.13	Cirbp	104.961	87.9747	100.805	78.8558	49.0766	66.4135
71.0665	-0.58405	0.294804	1.98115	0.047575	0.316518	ENSMUSG00000015095.12	Fbxw5	79.4301	85.2816	91.9849	65.2946	53.6208	50.7868
822.791	-0.340071	0.171803	1.97942	0.0477682	0.317298	ENSMUSG00000016252.7	Atp5e	951.742	734.319	1072.32	690.114	713.429	774.824
100.405	0.557244	0.281514	-1.97945	0.047765	0.317298	ENSMUSG00000049516.9	Spty2d1	65.2461	104.133	73.0839	110.499	142.686	106.782
78.1375	0.596288	0.30123	-1.97951	0.0477581	0.317298	ENSMUSG00000019966.18	Kitl	52.4806	68.2252	64.2635	73.8331	95.4268	114.596
739.888	0.408583	0.206448	-1.97911	0.0478038	0.317325	ENSMUSG00000035898.13	Uba6	597.144	668.787	638.854	576.099	1074.23	884.211
23.9752	-1.2879	0.650804	1.97894	0.047823	0.317325	ENSMUSG00000017404.12	Rpl19	24.1127	43.0896	36.542	31.1405	6.36179	2.60445
38.6043	-0.827994	0.418753	1.97728	0.0480095	0.318393	ENSMUSG00000050234.7	Gja4	53.899	49.3735	46.6225	41.6881	21.8118	18.2311
118.639	0.566008	0.286412	-1.9762	0.0481323	0.31887	ENSMUSG00000046352.7	Gjb2	68.0829	106.826	110.886	112.508	187.218	126.316
15.8223	1.20768	0.611085	-1.9763	0.0481213	0.31887	ENSMUSG00000054893.15	Zfp667	12.7655	7.1816	8.82047	15.068	26.356	24.7423
966.761	-0.283218	0.143345	1.97578	0.0481793	0.319013	ENSMUSG00000022814.6	Umps	1093.58	1057.49	1034.52	883.988	928.821	802.171
4.98257	-2.125	1.07581	1.97525	0.0482394	0.319073	ENSMUSG00000028339.17	Col15a1	9.92876	7.1816	7.56041	3.0136	0.908827	1.30222
91.2575	-0.576795	0.292009	1.97527	0.0482378	0.319073	ENSMUSG00000068740.13	Celsr2	113.472	116.701	99.5453	97.9419	59.9826	59.9023
1896.64	-0.397174	0.201131	1.9747	0.0483023	0.31932	ENSMUSG00000067274.10	Rplp0	2311.98	1941.73	2220.24	2223.03	1509.56	1173.3
11.2952	1.50972	0.764624	-1.97446	0.0483293	0.319331	ENSMUSG00000036216.5	Leap2	11.3472	1.7954	5.04027	13.0589	20.903	15.6267
217.539	-0.410539	0.208058	1.97319	0.0484739	0.319813	ENSMUSG00000022216.17	Psme1	280.842	222.63	240.673	177.3	166.315	217.472
127.935	0.519293	0.26321	-1.97292	0.0485044	0.319813	ENSMUSG00000022008.4	Gpalpp1	80.8485	120.292	113.406	135.11	189.036	128.92
46.5504	-0.74379	0.37694	1.97323	0.0484695	0.319813	ENSMUSG00000054792.15	Klhl18	52.4806	64.6344	59.2232	47.7153	31.8089	23.44
1031.29	0.329362	0.166923	-1.97314	0.0484801	0.319813	ENSMUSG00000051329.13	Nup160	912.027	937.199	890.868	929.695	1355.06	1162.89
771.702	0.40954	0.207637	-1.97239	0.048565	0.319875	ENSMUSG00000010608.15	Rbm25	624.093	763.046	598.532	618.792	1123.31	902.442
49.5042	-0.73911	0.374725	1.97241	0.0485629	0.319875	ENSMUSG00000029386.15	Tctn2	60.9909	64.6344	61.7433	53.7425	27.2648	28.6489
115.732	0.48865	0.247932	-1.9709	0.0487354	0.320829	ENSMUSG00000028030.12	Tbck	89.3588	105.031	94.5051	135.612	152.683	117.2
75.4134	-0.727236	0.369162	1.96996	0.0488428	0.320861	ENSMUSG00000096014.1	Sox1	86.522	99.6448	98.2853	94.426	34.5354	39.0667
269.175	0.465314	0.23617	-1.97025	0.0488094	0.320861	ENSMUSG00000037270.18	4932438A13Rik	181.554	295.344	197.831	239.581	342.628	358.112
221.792	0.400688	0.203384	-1.97011	0.048826	0.320861	ENSMUSG00000041773.8	Enc1	197.157	215.448	160.029	242.595	268.104	247.423
40.6977	0.880603	0.446899	-1.97048	0.0487838	0.320861	ENSMUSG00000017344.4	Vtn	28.3679	37.7034	20.1611	81.8694	31.8089	44.2756
167.85	0.456777	0.232017	-1.96872	0.0489848	0.321625	ENSMUSG00000061273.3	Mmgt1	147.513	120.292	156.248	157.209	213.574	212.263
386.601	0.404428	0.20548	-1.96821	0.0490438	0.321843	ENSMUSG00000038510.12	Rpf2	356.017	326.763	313.757	322.455	525.302	475.312
474.998	-0.309796	0.157425	1.96789	0.0490807	0.321892	ENSMUSG00000042750.7	Bex2	524.806	502.712	550.65	426.926	430.784	414.108
249.615	0.412649	0.209711	-1.9677	0.0491026	0.321892	ENSMUSG00000003309.14	Ap1m2	221.269	180.438	240.673	237.07	322.633	295.605
525.623	-0.324206	0.164824	1.96698	0.0491855	0.322267	ENSMUSG00000036180.15	Gatad2a	557.429	603.255	594.752	530.393	440.781	427.13
786.355	0.313781	0.159655	-1.96537	0.0493711	0.322504	ENSMUSG00000038335.13	Tsr1	686.503	668.787	748.48	799.608	1006.07	808.682
105.465	0.531792	0.270617	-1.96511	0.049402	0.322504	ENSMUSG00000008892.12	Vdac3	95.0324	73.6115	89.4648	101.96	119.056	153.663
147.104	0.457957	0.232991	-1.96556	0.0493496	0.322504	ENSMUSG00000031903.7	Pla2g15	151.768	108.622	112.146	161.73	169.951	178.405
426.802	0.368152	0.187326	-1.9653	0.0493794	0.322504	ENSMUSG00000025240.10	Sacm1l	382.966	330.354	403.222	392.27	499.855	552.143
1386.72	0.355761	0.180948	-1.96609	0.0492877	0.322504	ENSMUSG00000016018.4	Mtrex	1224.07	1207.41	1217.23	1217.49	2002.15	1451.98
1087.22	-0.292326	0.148725	1.96555	0.0493505	0.322504	ENSMUSG00000036751.7	Cox6b1	1214.15	1134.69	1242.43	1024.12	857.024	1050.9
48.14	-0.686975	0.349458	1.96583	0.0493186	0.322504	ENSMUSG00000048027.9	Rgmb	68.0829	58.3505	51.6628	38.1722	30.9001	41.6712
704.986	0.326835	0.166454	-1.96351	0.0495866	0.32354	ENSMUSG00000028809.16	Srrm1	591.47	686.741	596.012	686.096	905.191	764.406
861.799	-0.312259	0.159089	1.96279	0.04967	0.323916	ENSMUSG00000000171.5	Sdhd	1024.08	866.281	977.812	873.441	741.603	687.575
138.311	-0.505729	0.257838	1.96142	0.0498299	0.324697	ENSMUSG00000049300.11	Prmt6	178.718	129.269	181.45	142.644	93.6092	104.178
811.463	0.378821	0.193146	-1.96132	0.0498418	0.324697	ENSMUSG00000004364.14	Cul3	659.553	722.649	730.839	652.946	1011.52	1091.26
13.2846	-1.24851	0.636639	1.96109	0.0498683	0.324701	ENSMUSG00000017311.15	Pyy	17.0207	17.954	21.4212	10.0453	5.45296	7.81335
92.7379	-0.576673	0.294113	1.96072	0.0499112	0.324812	ENSMUSG00000028959.14	Fastk	104.961	128.371	100.805	97.4396	54.5296	70.3201
735.203	0.345468	0.176273	-1.95985	0.0500131	0.325306	ENSMUSG00000021488.8	Nsd1	642.533	677.764	619.953	648.928	965.174	856.864
104.99	-1.30217	0.664778	1.95881	0.0501352	0.325931	ENSMUSG00000107002.1	0610012G03Rik	171.626	141.837	136.087	119.539	30.9001	29.9512
817.549	-0.470123	0.24004	1.95852	0.050169	0.325952	ENSMUSG00000050288.6	Fzd2	958.834	1022.48	871.967	1037.18	561.655	453.174
1208.86	0.329937	0.168478	-1.95834	0.0501906	0.325952	ENSMUSG00000047879.17	Usp14	1069.47	1018.89	1123.98	1081.38	1607.71	1351.71
1301.17	-0.324179	0.165722	1.95616	0.0504467	0.326244	ENSMUSG00000053907.10	Mat2a	1517.68	1314.23	1513.34	1378.72	1123.31	959.74
8.58966	1.65135	0.844107	-1.95633	0.0504266	0.326244	ENSMUSG00000011267.8	Zfp296	1.41839	4.4885	6.30034	9.04079	17.2677	13.0222
527.159	0.35227	0.180139	-1.95555	0.0505183	0.326244	ENSMUSG00000042903.8	Foxo4	455.304	446.157	486.386	476.651	691.617	606.837
92.5948	-0.617531	0.315493	1.95735	0.0503063	0.326244	ENSMUSG00000051413.17	Plagl2	110.635	111.315	117.186	102.965	71.7973	41.6712
108.473	-0.534688	0.273289	1.95649	0.0504069	0.326244	ENSMUSG00000040859.14	Bsdc1	112.053	150.814	123.487	113.01	77.2503	74.2268
734.937	-0.351153	0.179571	1.95552	0.0505222	0.326244	ENSMUSG00000067148.15	Polr1c	859.547	746.887	869.447	800.11	548.931	584.699
92.6699	-0.555499	0.283979	1.95613	0.0504498	0.326244	ENSMUSG00000017837.12	Nkiras2	121.982	96.054	114.666	93.9238	59.0737	70.3201
993.897	-0.306853	0.156819	1.95673	0.0503792	0.326244	ENSMUSG00000020644.9	Id2	1211.31	916.552	1171.86	895.038	887.015	881.606
892.429	0.280868	0.143537	-1.95675	0.0503764	0.326244	ENSMUSG00000020457.13	Drg1	785.79	831.271	798.883	916.636	1029.7	992.295
7.61459	1.74833	0.893405	-1.95693	0.0503555	0.326244	ENSMUSG00000015090.13	Ptgds	1.41839	2.6931	6.30034	10.0453	10.9059	14.3245
601.325	0.333691	0.170618	-1.95577	0.0504922	0.326244	ENSMUSG00000020432.12	Tcn2	621.257	468.6	507.807	620.299	738.876	651.112
920.691	0.352496	0.180279	-1.95528	0.0505499	0.326255	ENSMUSG00000025968.16	Ndufs1	880.823	756.762	788.802	849.332	1297.8	950.624
101.085	0.55925	0.286235	-1.95381	0.0507233	0.32699	ENSMUSG00000028011.16	Tdo2	56.7358	87.077	100.805	111.001	145.412	105.48
112.812	-0.690489	0.353434	1.95365	0.050742	0.32699	ENSMUSG00000020107.10	Anapc16	140.421	134.655	146.168	149.675	59.0737	46.8801
46.4986	0.722528	0.369799	-1.95384	0.0507199	0.32699	ENSMUSG00000001986.16	Gria3	31.2047	41.2942	31.5017	45.204	58.1649	71.6224
106.086	-0.565668	0.289797	1.95195	0.0509446	0.327124	ENSMUSG00000006378.15	Gcat	175.881	111.315	94.5051	95.4306	89.065	70.3201
14.5227	-1.26159	0.646327	1.95194	0.0509457	0.327124	ENSMUSG00000025237.16	Parp6	8.51036	26.0333	26.4614	7.53399	8.17944	10.4178
10.5006	1.52652	0.781691	-1.95284	0.0508385	0.327124	ENSMUSG00000007655.16	Cav1	1.41839	8.07931	6.30034	18.5838	9.08827	19.5334
77.488	-0.628715	0.322087	1.952	0.0509381	0.327124	ENSMUSG00000011158.8	Brf1	59.5726	128.371	93.245	62.281	56.3473	65.1112
117.408	-0.505367	0.258854	1.95232	0.0508999	0.327124	ENSMUSG00000016526.8	Dyrk3	150.35	135.553	129.787	121.046	90.8827	76.8313
906.516	0.294848	0.150982	-1.95287	0.050835	0.327124	ENSMUSG00000025016.11	Tm9sf3	753.167	862.69	825.344	934.717	1106.04	957.135
892.577	-0.340953	0.174647	1.95225	0.0509087	0.327124	ENSMUSG00000032966.14	Fkbp1a	1026.92	984.778	985.373	983.437	713.429	661.53
276.253	-0.515836	0.264416	1.95085	0.0510752	0.327452	ENSMUSG00000090841.2	Myl6	307.792	284.571	385.581	323.962	138.142	217.472
10.6385	-1.51664	0.777314	1.95114	0.051041	0.327452	ENSMUSG00000073471.3	Rsph3a	14.1839	15.2609	18.901	10.5476	3.63531	1.30222
263.93	0.393126	0.201513	-1.95087	0.0510727	0.327452	ENSMUSG00000017009.3	Sdc4	269.495	197.494	219.252	285.789	338.084	273.467
6.23877	-1.99181	1.02117	1.95052	0.0511144	0.327535	ENSMUSG00000024330.17	Col11a2	9.92876	14.3632	6.30034	5.02266	1.81765	0
633.19	0.33579	0.1722	-1.95	0.0511763	0.327764	ENSMUSG00000024474.7	Ik	564.521	607.743	505.287	604.226	820.671	696.69
107.205	0.610005	0.312923	-1.94938	0.0512502	0.327921	ENSMUSG00000032323.13	Cyp11a1	70.9197	86.1793	95.7651	109.996	86.3385	194.032
421.34	0.36451	0.18699	-1.94935	0.0512532	0.327921	ENSMUSG00000030660.9	Pik3c2a	364.527	357.285	381.8	378.709	553.475	492.241
1632.36	0.268705	0.137923	-1.94821	0.0513893	0.328229	ENSMUSG00000021577.14	Sdha	1538.96	1456.97	1446.56	1681.08	1950.34	1720.24
452.568	-0.358761	0.184151	1.94819	0.051392	0.328229	ENSMUSG00000028066.15	Pmf1	510.622	521.564	496.467	487.198	345.354	354.205
1440.19	0.300213	0.154108	-1.94807	0.0514062	0.328229	ENSMUSG00000031996.17	Aplp2	1231.17	1350.14	1292.83	1670.03	1771.3	1325.66
170.285	-0.412827	0.211886	1.94834	0.0513738	0.328229	ENSMUSG00000026966.6	Ssna1	204.249	178.642	200.351	134.607	155.409	148.454
457.776	0.401411	0.206086	-1.94778	0.0514414	0.328286	ENSMUSG00000022119.15	Rbm26	327.649	466.804	385.581	398.297	616.185	552.143
7.78806	-1.69893	0.872906	1.94629	0.0516197	0.329256	ENSMUSG00000028698.13	Pik3r3	15.6023	14.3632	6.30034	5.52493	3.63531	1.30222
903.678	0.310031	0.159462	-1.94423	0.0518679	0.330334	ENSMUSG00000029152.13	Ociad1	879.404	723.547	817.784	870.93	1095.14	1035.27
307.446	-0.439327	0.225944	1.94441	0.0518463	0.330334	ENSMUSG00000070394.10	Tmem256	392.895	320.479	351.559	347.066	191.762	240.912
467.8	-0.355371	0.182776	1.9443	0.0518596	0.330334	ENSMUSG00000055612.15	Cdca7	475.162	532.336	570.811	484.185	404.428	339.881
68.095	0.621776	0.320234	-1.94163	0.0521818	0.331033	ENSMUSG00000047797.14	Gjb1	66.6645	40.3965	54.1829	73.8331	74.5238	98.9691
572.41	0.333625	0.17179	-1.94205	0.0521308	0.331033	ENSMUSG00000038828.13	Tmem214	512.04	535.03	473.785	665.503	720.7	527.401
390.915	0.392859	0.202207	-1.94286	0.0520332	0.331033	ENSMUSG00000027712.13	Anxa5	346.088	337.535	330.138	488.203	322.633	520.89
78.434	-0.781061	0.402283	1.94157	0.052189	0.331033	ENSMUSG00000048087.6	Gm4737	90.7772	86.1793	123.487	98.9464	49.0766	22.1378
727.524	-0.326983	0.168402	1.94168	0.0521755	0.331033	ENSMUSG00000038612.16	Mcl1	808.485	805.237	819.044	758.924	643.449	530.006
38.6123	-0.810987	0.41764	1.94183	0.0521576	0.331033	ENSMUSG00000078317.6	F8a	55.3174	48.4758	45.3624	41.6881	19.9942	20.8356
50.0344	0.703335	0.362037	-1.94272	0.0520504	0.331033	ENSMUSG00000048661.14	Lemd3	32.6231	37.7034	42.8423	46.7108	60.8914	79.4357
666.238	-0.316415	0.162941	1.9419	0.0521497	0.331033	ENSMUSG00000022354.4	Ndufb9	822.669	649.935	745.96	623.312	534.39	621.161
246.036	-0.392153	0.20204	1.94097	0.0522619	0.331327	ENSMUSG00000024381.16	Bin1	306.373	263.026	269.654	239.079	175.404	222.68
11.6187	-1.45627	0.750659	1.93999	0.0523807	0.331912	ENSMUSG00000054850.4	Smim10l2a	14.1839	25.1356	12.6007	11.5521	3.63531	2.60445
259.1	0.457246	0.235758	-1.93947	0.0524437	0.332143	ENSMUSG00000024298.15	Zfp871	178.718	251.356	221.772	209.947	339.901	352.903
177.707	0.476622	0.245822	-1.93889	0.0525147	0.332425	ENSMUSG00000039219.18	Arid4b	150.35	156.2	137.347	144.653	247.201	230.494
122.287	-0.463001	0.238911	1.93797	0.0526274	0.33297	ENSMUSG00000039686.14	Zer1	160.279	124.78	141.128	105.476	101.789	100.271
455.095	-0.357306	0.184426	1.93739	0.0526971	0.333082	ENSMUSG00000001507.16	Itga3	480.836	527.848	527.968	484.687	377.163	332.067
160.835	0.481206	0.248379	-1.93738	0.0526984	0.333082	ENSMUSG00000024378.9	Stard4	114.89	122.985	163.809	144.15	219.936	199.24
381.257	0.421425	0.217574	-1.93692	0.0527547	0.33327	ENSMUSG00000045624.15	Esf1	314.883	320.479	342.738	368.161	596.19	345.09
233.642	0.384447	0.198541	-1.93636	0.0528235	0.333537	ENSMUSG00000005034.15	Prkacb	191.483	219.039	195.31	236.065	261.742	298.21
133.036	-0.465096	0.240233	1.93602	0.052865	0.33363	ENSMUSG00000064030.15	Pym1	146.095	164.279	153.728	133.603	96.3356	104.178
6701.12	0.308232	0.159237	-1.93568	0.0529068	0.333712	ENSMUSG00000032216.15	Nedd4	5770.03	6368.29	5825.29	6765.53	9140.98	6336.63
1964.51	-0.262944	0.135855	1.93548	0.0529312	0.333712	ENSMUSG00000036309.14	Skp1a	2225.46	2098.82	2103.05	1709.71	1694.05	1955.94
907.806	0.292706	0.151266	-1.93504	0.0529859	0.333889	ENSMUSG00000019087.13	Atp6ap1	770.188	769.329	909.769	1003.53	1064.24	929.789
188.194	0.436742	0.225758	-1.93456	0.0530441	0.334087	ENSMUSG00000021792.15	Prxl2a	195.738	130.167	156.248	225.015	234.477	187.52
124.571	-0.495301	0.256126	1.93382	0.0531355	0.334327	ENSMUSG00000020544.14	Cox11	163.115	145.427	131.047	129.585	93.6092	84.6446
1287.29	0.385183	0.199182	-1.93383	0.0531342	0.334327	ENSMUSG00000071516.2	H2ac13	1024.08	1218.18	1102.56	1020.6	1471.39	1886.92
182.9	-0.397649	0.205685	1.93329	0.0532002	0.334565	ENSMUSG00000001415.10	Smg5	207.086	206.471	210.431	166.25	141.777	165.383
122.755	0.487985	0.252441	-1.93307	0.0532279	0.334571	ENSMUSG00000035051.15	Dhx57	114.89	102.338	88.2047	120.544	139.959	170.591
81.2448	-0.631604	0.326778	1.93282	0.0532579	0.334592	ENSMUSG00000066705.7	Fxyd6	93.614	87.077	117.186	88.3988	39.9884	61.2046
39.0019	-0.965731	0.500042	1.9313	0.0534461	0.335274	ENSMUSG00000037894.13	H2az1	46.807	68.2252	41.5822	50.2266	15.4501	11.72
36.6161	0.779468	0.403599	-1.93129	0.0534468	0.335274	ENSMUSG00000031214.13	Ophn1	31.2047	27.8287	21.4212	37.1677	49.9855	52.089
267.534	0.515547	0.266915	-1.9315	0.0534211	0.335274	ENSMUSG00000040693.7	Slco4c1	235.453	200.187	224.292	188.35	453.505	303.418
109.64	-0.572637	0.296667	1.93023	0.0535779	0.335723	ENSMUSG00000033191.14	Tie1	139.003	112.213	144.908	125.567	64.5267	71.6224
36.4835	-0.829881	0.42997	1.93009	0.0535958	0.335723	ENSMUSG00000024065.8	Ehd3	41.1334	41.2942	59.2232	35.6609	27.2648	14.3245
190.247	0.424815	0.220104	-1.93007	0.0535988	0.335723	ENSMUSG00000036676.14	Tmtc3	141.839	166.972	176.409	179.811	229.024	247.423
[truncated: 10,522 more rows]

## Sheet: DE_RPF_Hbs1l_MEFs
baseMean	log2FoldChange	lfcSE	stat	pvalue	padj	gene_id	external_gene_name	Cre_control_fibro_Hbs1l_batch_1	Cre_control_fibro_Hbs1l_batch_2	Cre_control_fibro_Hbs1l_batch_3	Hbs1l_fibro_1	Hbs1l_fibro_2	Hbs1l_fibro_3
203.76092116087094	-4.1595	0.236022	17.6233	1.63076e-69	2.10352e-65	ENSMUSG00000019977.16	Hbs1l	382.241	425.828	352.18	27.9507	18.0147	16.3513
608.2846569976125	-2.48717	0.154544	16.0936	2.82826e-58	1.82409e-54	ENSMUSG00000026678.10	Rgs5	947.619	1224.05	927.246	151.085	162.132	237.575
542.0429163711187	1.96424	0.126134	-15.5726	1.11786e-54	4.52563e-51	ENSMUSG00000027580.17	Helz2	242.305	214.558	204.554	864.206	976.397	750.237
175.65041801835258	4.4626	0.286836	-15.558	1.4034e-54	4.52563e-51	ENSMUSG00000030107.10	Usp18	15.0267	12.3309	18.3326	340.697	439.559	227.957
312.7708598982114	2.46769	0.170522	-14.4714	1.83677e-47	4.73851e-44	ENSMUSG00000026896.14	Ifih1	91.0992	78.9179	117.715	580.922	581.875	426.096
813.010453353661	1.96404	0.139142	-14.1154	3.05259e-45	6.56257e-42	ENSMUSG00000029826.14	Zc3hav1	370.971	240.864	384.021	1282.71	1423.16	1176.33
573.7400368823457	1.53221	0.10967	-13.9711	2.33904e-44	4.31019e-41	ENSMUSG00000034218.16	Atm	285.507	279.501	320.339	818.881	834.081	904.132
123.0587264709031	3.71869	0.277352	-13.4078	5.44166e-41	8.774e-38	ENSMUSG00000028037.13	Ifi44	15.9658	12.3309	24.1219	247.024	264.816	174.093
551.9115475289888	-1.68181	0.126178	13.3289	1.57238e-40	2.25357e-37	ENSMUSG00000031626.18	Sorbs2	771.056	947.015	809.531	247.779	235.993	300.095
157.58980288559349	2.79536	0.2106	-13.2733	3.30812e-40	4.26715e-37	ENSMUSG00000034855.13	Cxcl10	41.3233	32.0604	45.3492	258.355	326.066	242.384
20835.723920655288	-1.20178	0.0913834	13.151	1.67941e-39	1.96934e-36	ENSMUSG00000059430.14	Actg2	27506.3	30368.6	29258.9	11067	12217.6	14596
2173.363954400044	-1.2714	0.101799	12.4894	8.53438e-36	9.17375e-33	ENSMUSG00000046432.12	Bex3	2979.04	3339.22	2910.07	1216.23	1111.51	1484.12
572.0277205621036	-1.69826	0.13882	12.2335	2.05761e-34	2.04162e-31	ENSMUSG00000044303.6	Cdkn2a	857.459	957.702	810.496	227.383	239.596	339.53
2814.357112748425	-1.01581	0.0836216	12.1477	5.90249e-34	5.4383e-31	ENSMUSG00000020467.15	Efemp1	3415.75	4112.78	3772.67	1877.23	1803.27	1904.45
1116.7900435072834	1.08378	0.0898322	-12.0644	1.6276e-33	1.39963e-30	ENSMUSG00000026605.14	Cenpf	722.219	681.489	748.744	1589.41	1414.15	1544.72
1185.885173364414	-1.49447	0.124261	12.0269	2.56702e-33	2.0695e-30	ENSMUSG00000021403.3	Serpinb9b	1435.05	2109.41	1701.08	565.058	673.75	630.968
356.9991911519398	2.02609	0.168982	-11.99	4.01095e-33	3.04337e-30	ENSMUSG00000040033.16	Stat2	119.274	119.199	183.326	583.188	664.743	472.265
100.51916386956846	4.28363	0.357553	-11.9804	4.50257e-33	3.2266e-30	ENSMUSG00000033355.6	Rtp4	9.39167	5.75443	14.4731	195.655	257.61	120.23
3420.2935768667658	2.7743	0.231877	-11.9645	5.45067e-33	3.70043e-30	ENSMUSG00000070327.14	Rnf213	867.79	739.034	1010.23	6279.85	7173.46	4451.41
8505.92314424617	-1.01917	0.0854107	11.9326	8.00538e-33	5.16307e-30	ENSMUSG00000067818.6	Myl9	11023	12913.8	10237.3	5518.38	5528.72	5814.34
10367.586269683425	-0.973767	0.0817416	11.9127	1.01582e-32	6.23952e-30	ENSMUSG00000031119.4	Gpc4	12867.5	15193.3	13159.9	6739.15	6710.48	7535.07
3614.0557145458943	-1.29901	0.109653	11.8465	2.24274e-32	1.31496e-29	ENSMUSG00000028776.14	Tinagl1	4971.01	6145.73	4298.52	1919.54	2111.32	2238.21
2929.700298649527	-1.00261	0.0851375	11.7763	5.16983e-32	2.89937e-29	ENSMUSG00000032060.10	Cryab	3936.05	4285.41	3502.5	1899.14	1956.4	1998.71
654.5276082289236	-1.80313	0.154584	11.6644	1.93803e-31	1.04161e-28	ENSMUSG00000056888.11	Glipr1	934.471	1163.22	951.368	211.519	297.243	369.347
1182.981854194789	-1.14317	0.0981543	11.6466	2.38688e-31	1.23153e-28	ENSMUSG00000004951.10	Hspb1	1611.61	1786.34	1490.73	715.388	693.566	800.253
1726.751179280513	-1.05389	0.0918823	11.47	1.86755e-30	9.2652e-28	ENSMUSG00000031451.6	Gas6	2211.74	2330.55	2439.21	1096.88	1266.43	1015.71
212.33085421491472	2.02477	0.17916	-11.3015	1.28972e-29	6.16151e-27	ENSMUSG00000026725.17	Tnn	94.8559	86.3165	71.4008	408.685	297.243	315.484
495.3703239853875	1.63673	0.146649	-11.1609	6.33646e-29	2.81841e-26	ENSMUSG00000004098.7	Col5a3	282.689	235.11	203.589	789.419	859.302	602.113
569.9945126456653	-1.79125	0.160485	11.1615	6.29464e-29	2.81841e-26	ENSMUSG00000019851.8	Perp	802.988	1161.57	685.062	234.182	277.427	258.736
243.0742132576688	1.9173	0.171927	-11.1518	7.01375e-29	3.01568e-26	ENSMUSG00000021702.7	Thbs4	93.9167	83.8503	129.293	434.369	362.096	354.92
273.7024979856018	2.14356	0.192592	-11.13	8.96144e-29	3.72883e-26	ENSMUSG00000024053.11	Emilin2	93.9167	80.5621	128.329	478.184	533.235	327.988
94.29971613903439	3.30156	0.298226	-11.0707	1.74064e-28	7.01642e-26	ENSMUSG00000040483.15	Xaf1	14.0875	15.6192	22.1921	182.057	212.574	119.268
4806.367589529837	-1.00793	0.0913711	11.0311	2.70428e-28	1.05704e-25	ENSMUSG00000001349.5	Cnn1	6116.79	6828.87	6319.94	2958.24	2938.2	3676.16
1242.902260798444	-0.950354	0.0863379	11.0074	3.52089e-28	1.33576e-25	ENSMUSG00000047497.10	Adamts12	1633.21	1670.43	1616.17	841.544	789.044	907.017
935.4856337205266	2.75114	0.25091	-10.9646	5.65357e-28	2.08358e-25	ENSMUSG00000046718.8	Bst2	227.278	201.405	297.182	1679.31	1970.81	1236.93
835.8661490488015	1.32078	0.120596	-10.9521	6.49086e-28	2.32571e-25	ENSMUSG00000040296.15	Ddx58	472.401	409.387	551.909	1263.07	1284.45	1033.98
78.63327867742052	3.64859	0.335668	-10.8696	1.60886e-27	5.60885e-25	ENSMUSG00000025498.15	Irf7	7.51334	8.22062	19.2975	150.33	172.941	113.497
227.45715961175947	-1.85556	0.170775	10.8655	1.6833e-27	5.7139e-25	ENSMUSG00000020173.17	Cobl	312.743	417.607	339.636	108.026	97.2794	89.4513
4324.586471147943	0.795811	0.0733876	-10.8439	2.13092e-27	7.04789e-25	ENSMUSG00000036181.2	H1f2	3365.04	3063.82	3051.9	5497.23	5717.87	5251.66
3276.8610602926074	0.892611	0.0833359	-10.711	9.03738e-27	2.91433e-24	ENSMUSG00000004099.16	Dnmt1	2401.45	2102.01	2385.17	4609.6	4029.89	4133.04
297.4465141600938	1.77967	0.16639	-10.6958	1.06523e-26	3.35132e-24	ENSMUSG00000029287.14	Tgfbr3	147.449	115.089	140.872	543.906	473.787	363.576
934.5816879748027	-1.10461	0.105003	10.5198	7.00206e-26	2.15046e-23	ENSMUSG00000026235.14	Epha4	1182.41	1458.34	1185.83	602.829	598.088	579.991
4080.1241155605494	-0.941565	0.0896111	10.5072	8.00007e-26	2.39983e-23	ENSMUSG00000032135.15	Mcam	5321.32	5839.11	4938.24	2563.16	2711.21	3107.71
1606.6763104596748	2.58771	0.248908	-10.3962	2.57916e-25	7.56105e-23	ENSMUSG00000033880.11	Lgals3bp	411.355	402.81	560.593	2886.48	3314.71	2064.11
5527.418211266791	1.05128	0.10125	-10.3831	2.95987e-25	8.4843e-23	ENSMUSG00000058773.2	H1f5	3850.58	2920.79	4026.43	7842.07	7331.99	7192.66
136.74442193987406	-2.42016	0.233248	10.3759	3.19249e-25	8.95216e-23	ENSMUSG00000054690.17	Emcn	260.149	220.313	214.202	36.2604	27.0221	62.5197
5132.393500994815	-0.675301	0.0654337	10.3204	5.69963e-25	1.56425e-22	ENSMUSG00000007891.16	Ctsd	6326.23	6477.03	6129.86	3911.59	4011.88	3937.78
212.64068001612137	1.73618	0.168465	-10.3059	6.62686e-25	1.78083e-22	ENSMUSG00000069793.12	Slfn9	101.43	79.74	113.855	341.452	344.081	295.286
9196.497501059523	-0.700528	0.068087	10.2887	7.92188e-25	2.08539e-22	ENSMUSG00000015932.8	Dstn	11020.2	11566.4	11577.5	6856.24	6730.3	7428.31
175.55585329961443	2.47875	0.241032	-10.2839	8.32836e-25	2.14855e-22	ENSMUSG00000049502.17	Dtx3l	41.3233	46.8575	71.4008	307.458	389.118	197.178
2259.4419040700977	-0.790991	0.0769853	10.2746	9.17462e-25	2.32046e-22	ENSMUSG00000021253.7	Tgfb3	2799.66	3052.32	2737.35	1649.85	1671.77	1645.71
931.4107428321367	-1.14147	0.111274	10.2582	1.0866e-24	2.6954e-22	ENSMUSG00000066842.18	Hmcn1	1151.42	1440.25	1247.58	591.498	643.125	514.586
1927.216490650549	0.901105	0.0880823	-10.2303	1.45119e-24	3.53186e-22	ENSMUSG00000038252.13	Ncapd2	1266	1275.84	1493.63	2655.32	2455.41	2417.11
2849.03871456667	1.06666	0.104825	-10.1756	2.549e-24	6.0888e-22	ENSMUSG00000031004.8	Mki67	1815.41	1569.32	2144.92	4194.12	3503.86	3866.61
130453.00778519192	-0.7213	0.0709458	10.1669	2.78566e-24	6.53314e-22	ENSMUSG00000035783.9	Acta2	158006	175430	153765	94501.4	98596.3	102419
5067.159772371769	0.921933	0.0913467	-10.0927	5.95229e-24	1.37105e-21	ENSMUSG00000020914.17	Top2a	3509.67	3052.32	3946.34	7063.98	6299.74	6530.91
86.67413414514837	2.87016	0.28489	-10.0746	7.15204e-24	1.61849e-21	ENSMUSG00000078853.8	Igtp	20.6617	16.4412	25.0868	141.264	196.36	120.23
3373.0791219097864	1.11304	0.110745	-10.0505	9.14216e-24	2.03318e-21	ENSMUSG00000049539.3	H1f1	2312.23	1670.43	2417.98	4813.57	4674.82	4349.45
578.63273809699206	-1.18029	0.117669	10.0306	1.11852e-23	2.44538e-21	ENSMUSG00000037736.20	Limch1	758.847	906.734	747.779	366.381	318.86	373.195
577.1299579433178	-1.14981	0.114752	10.0199	1.24619e-23	2.67911e-21	ENSMUSG00000045103.19	Dmd	733.489	872.208	782.514	340.697	340.478	393.393
365.79644428800134	1.74372	0.175345	-9.94446	2.66606e-23	5.63763e-21	ENSMUSG00000029659.16	Medag	162.476	120.021	222.886	602.829	614.302	472.265
305.81482852955395	1.88262	0.189865	-9.91553	3.56358e-23	7.29629e-21	ENSMUSG00000036446.5	Lum	158.719	124.131	109.996	637.579	434.155	370.309
565.1707948698925	-1.43101	0.144318	9.91562	3.56026e-23	7.29629e-21	ENSMUSG00000024521.8	Pmaip1	812.379	968.389	695.676	275.73	266.618	372.233
3436.60156540583	0.868231	0.0877643	-9.89276	4.4751e-23	9.01943e-21	ENSMUSG00000052565.7	H1f3	2682.26	2245.05	2376.49	4832.45	4127.17	4356.18
168.08789195428002	-2.23393	0.226915	9.8448	7.2181e-23	1.4324e-20	ENSMUSG00000054889.10	Dsp	238.548	357.597	229.64	49.8581	82.8677	50.0158
373.3151026140837	-1.61021	0.163999	9.81842	9.37987e-23	1.8332e-20	ENSMUSG00000024049.15	Myom1	591.675	660.116	439.983	182.057	147.721	218.338
2364.1897483007283	-1.01833	0.103795	9.81104	1.00919e-22	1.94291e-20	ENSMUSG00000053626.5	Tll1	3059.81	3417.31	3021.03	1371.1	1468.2	1847.7
3894.3373324778427	-0.703414	0.0719678	9.77402	1.45558e-22	2.76111e-20	ENSMUSG00000020326.7	Ccng1	4736.22	4901.13	4848.5	3051.92	2758.05	3070.2
2497.0351552986076	-0.842876	0.0862838	9.76865	1.53487e-22	2.86933e-20	ENSMUSG00000028128.13	F3	2947.11	3543.09	3133.92	1834.93	1687.98	1835.19
5811.197996657489	-0.639361	0.0658531	9.7089	2.76307e-22	5.09155e-20	ENSMUSG00000026249.10	Serpine2	7181.81	7268.67	6782.11	4497.8	4575.74	4561.06
338.5649596210761	-1.4719	0.15172	9.7014	2.97391e-22	5.40289e-20	ENSMUSG00000030587.5	2200002D01Rik	456.435	587.774	453.492	182.057	147.721	203.911
77.90497611637645	2.82756	0.292739	-9.659	4.50259e-22	8.06651e-20	ENSMUSG00000069874.7	Irgm2	15.9658	14.7971	27.0165	140.509	158.529	110.612
203.34607726850314	-1.91756	0.200124	9.58182	9.53508e-22	1.68484e-19	ENSMUSG00000037379.7	Spon2	276.115	420.074	266.306	86.1185	95.478	75.9855
1764.0516841912888	-1.1189	0.116891	9.57213	1.04722e-21	1.82541e-19	ENSMUSG00000061353.11	Cxcl12	2736.73	2429.19	2087.03	1037.95	972.794	1320.61
2115.894297022283	0.713972	0.0746348	-9.56622	1.10889e-21	1.90714e-19	ENSMUSG00000050244.9	Heatr1	1565.59	1570.14	1675.02	2691.58	2579.71	2613.33
1817.0865388529126	0.872248	0.0924354	-9.43629	3.86201e-21	6.55474e-19	ENSMUSG00000005410.6	Mcm5	1268.81	1210.9	1368.19	2365.24	2588.71	2100.66
14112.273753381116	0.935265	0.0994963	-9.39999	5.45663e-21	9.14091e-19	ENSMUSG00000026043.18	Col3a1	9893.18	9052.55	10127.3	20231	20250.3	15119.2
7622.979989647201	-0.665149	0.0710582	9.36063	7.92654e-21	1.31083e-18	ENSMUSG00000025068.8	Gsto1	9309.96	9440.56	9298.51	5535.75	5809.74	6343.35
272.0584063034007	1.54928	0.165861	-9.34085	9.55683e-21	1.56042e-18	ENSMUSG00000073411.12	H2-D1	142.753	131.53	139.907	432.859	475.588	309.713
2033.49375132656	-0.737357	0.0793184	9.29616	1.45606e-20	2.34771e-18	ENSMUSG00000026817.14	Ak1	2562.99	2634.71	2434.38	1526.71	1433.97	1608.2
531.8189326628101	1.24775	0.134632	-9.26782	1.89986e-20	3.02547e-18	ENSMUSG00000004655.5	Aqp1	348.431	304.985	293.322	881.581	742.206	620.388
1619.2396304762453	0.90166	0.0978058	-9.21888	3.00219e-20	4.72259e-18	ENSMUSG00000045328.11	Cenpe	1133.57	984.83	1273.64	2190.73	1976.21	2156.45
2028.6298599258907	-0.993754	0.108198	9.18462	4.12992e-20	6.41829e-18	ENSMUSG00000014602.15	Kif1a	2720.77	3090.13	2297.37	1346.92	1214.19	1502.4
132.91400614770498	2.58584	0.281894	-9.17312	4.5952e-20	7.05636e-18	ENSMUSG00000045573.9	Penk	33.81	39.459	41.4897	355.05	174.743	152.933
2255.4613143956008	-0.768482	0.0838459	9.16541	4.93568e-20	7.49003e-18	ENSMUSG00000006356.10	Crip2	2736.73	3076.16	2720.95	1772.23	1563.68	1663.03
944.4095916762008	-0.887412	0.0971109	9.13813	6.35432e-20	9.53074e-18	ENSMUSG00000031521.5	Aga	1228.43	1276.66	1171.36	607.362	659.338	723.305
806.9259165324919	-0.884468	0.0968054	9.13656	6.44714e-20	9.55881e-18	ENSMUSG00000060600.15	Eno3	1024.63	1103.21	1017.94	584.699	522.427	588.647
256.12664815018996	-1.55624	0.170586	9.12291	7.31367e-20	1.07203e-17	ENSMUSG00000027858.13	Tspan2	361.579	466.109	316.479	116.335	138.713	137.543
715.1628995711172	1.28678	0.141128	-9.11786	7.66217e-20	1.1105e-17	ENSMUSG00000027848.12	Olfml3	425.443	349.376	471.824	1108.21	1149.34	786.787
3826.729646141146	2.28398	0.250642	-9.11254	8.04774e-20	1.15342e-17	ENSMUSG00000026069.15	Il1rl1	1319.53	947.015	1646.08	6971.82	5344.96	6730.97
1027.8329622221806	-0.872032	0.0958469	9.09817	9.1863e-20	1.30213e-17	ENSMUSG00000039239.14	Tgfb2	1336.43	1440.25	1209.95	700.279	725.993	754.084
1048.7197980586736	-0.871734	0.0963343	9.04905	1.4422e-19	2.02206e-17	ENSMUSG00000022894.6	Adamts5	1299.81	1437.79	1324.77	751.648	808.861	669.442
2720.4338108459824	-0.817791	0.0906342	9.02298	1.83041e-19	2.53875e-17	ENSMUSG00000027907.4	S100a11	3285.21	3963.98	3163.83	1996.59	1981.62	1931.38
1720.9136332380754	0.827276	0.0920386	-8.98835	2.5096e-19	3.44376e-17	ENSMUSG00000027715.9	Ccna2	1306.38	1076.08	1341.18	2220.19	2205	2176.65
681.4234577010801	1.04199	0.116031	-8.98026	2.70121e-19	3.66767e-17	ENSMUSG00000023942.15	Slc29a1	447.043	386.369	502.7	944.281	980	828.146
3192.4883292980335	0.680024	0.0759951	-8.94827	3.61108e-19	4.80199e-17	ENSMUSG00000003779.16	Kif20a	2472.83	2330.55	2563.68	4163.15	3739.85	3884.88
485.0620649665366	-1.32097	0.147607	8.94927	3.5783e-19	4.80199e-17	ENSMUSG00000073802.5	Cdkn2b	672.444	841.791	562.523	245.513	277.427	310.675
1208.439504335357	0.824873	0.0924306	-8.92424	4.48767e-19	5.90679e-17	ENSMUSG00000020899.16	Pfas	953.254	813.841	848.126	1577.33	1610.52	1447.57
1391.5784305831758	-0.929661	0.104283	8.91481	4.88671e-19	6.36704e-17	ENSMUSG00000042712.10	Tceal9	1704.59	2125.85	1646.08	941.26	916.949	1014.74
748.8086630021947	1.01251	0.113834	-8.89464	5.86107e-19	7.56019e-17	ENSMUSG00000032548.14	Slco2a1	467.705	496.525	525.857	1134.65	1003.42	864.696
757.7361889151523	0.96945	0.109339	-8.86645	7.55135e-19	9.64405e-17	ENSMUSG00000006678.6	Pola1	507.15	448.024	584.715	1006.23	954.78	1045.52
178.3794656958605	2.02939	0.229186	-8.85476	8.3866e-19	1.06058e-16	ENSMUSG00000027656.7	Ccn5	74.1942	45.2134	91.6632	326.344	326.066	206.796
7352.598827926178	0.570522	0.0644843	-8.84745	8.95389e-19	1.11054e-16	ENSMUSG00000040463.16	Mybbp1a	5812.5	6158.07	5782.5	8911.75	8675.89	8774.89
923.0637063524036	-0.987377	0.111598	8.84761	8.94149e-19	1.11054e-16	ENSMUSG00000038530.11	Rgs4	1173.02	1328.45	1186.8	723.697	565.662	560.754
601.5594163166506	-1.06863	0.120883	8.84025	9.55022e-19	1.17322e-16	ENSMUSG00000033542.13	Arhgef5	779.509	933.04	733.306	372.425	362.096	428.982
3829.112838906535	-0.856131	0.0970426	8.82222	1.12213e-18	1.36551e-16	ENSMUSG00000001552.14	Jup	4855.49	5666.47	4276.33	2581.29	2678.79	2916.31
896.0065906272142	0.831447	0.0943291	-8.81431	1.20419e-18	1.43823e-16	ENSMUSG00000037544.14	Dlgap5	606.702	650.251	679.273	1217.75	1116.91	1105.16
293.7648527841057	1.26779	0.143831	-8.81438	1.20347e-18	1.43823e-16	ENSMUSG00000037902.18	Sirpa	177.503	144.683	194.905	411.707	441.36	392.432
815.8680669133449	0.962317	0.109236	-8.80954	1.25657e-18	1.48702e-16	ENSMUSG00000024795.11	Kif20b	542.839	481.728	638.748	1118.78	1035.85	1077.26
1435.7437794563443	-0.72769	0.0826556	8.80388	1.32162e-18	1.54978e-16	ENSMUSG00000025006.18	Sorbs1	1807.9	1825.8	1742.57	1079.5	1016.03	1142.67
549.8622131760887	1.01254	0.115029	-8.80253	1.33764e-18	1.55443e-16	ENSMUSG00000067276.5	Capn6	402.903	363.351	325.163	744.094	783.64	680.022
1053.0715616279506	0.942705	0.107134	-8.79929	1.37681e-18	1.58567e-16	ENSMUSG00000015880.13	Ncapg	700.619	629.699	834.618	1345.41	1325.88	1482.2
2452.7107954334274	0.734336	0.083518	-8.79255	1.46197e-18	1.66885e-16	ENSMUSG00000058006.12	Mdn1	1755.3	1929.38	1845.81	3147.86	2772.46	3265.45
4460.053764707024	0.852181	0.0969773	-8.78743	1.53025e-18	1.73147e-16	ENSMUSG00000051627.3	H1f4	3425.14	2742.4	3379	6338.77	5182.83	5692.18
1968.8536580366688	0.740083	0.0844264	-8.76601	1.85106e-18	2.07625e-16	ENSMUSG00000039646.5	Vasn	1466.04	1427.1	1531.26	2632.66	2513.05	2243.02
7058.590080660864	-0.73395	0.0838806	8.74993	2.13484e-18	2.3739e-16	ENSMUSG00000037852.8	Cpe	8745.52	9741.43	7962.16	5071.17	5175.63	5655.63
920.4964950300897	-1.06512	0.121993	8.73097	2.52498e-18	2.78374e-16	ENSMUSG00000025650.13	Col7a1	1179.59	1444.36	1111.54	518.977	583.677	684.832
54.027078975018014	3.01972	0.346378	-8.71799	2.83179e-18	3.09553e-16	ENSMUSG00000028268.14	Gbp3	10.3308	9.86474	15.438	103.493	108.088	76.9474
745.0895539227399	1.17361	0.134707	-8.71233	2.97704e-18	3.22696e-16	ENSMUSG00000037362.8	Ccn3	463.009	401.166	512.349	1261.56	961.986	870.467
930.2918390728482	0.829247	0.0952077	-8.70987	3.04225e-18	3.27016e-16	ENSMUSG00000032902.1	Slc16a1	674.322	609.148	728.481	1211.7	1181.77	1176.33
1208.7454669680574	0.911976	0.104994	-8.68602	3.75365e-18	4.00151e-16	ENSMUSG00000012443.4	Kif11	837.737	722.592	961.017	1646.07	1468.2	1616.86
617.4357319656694	0.873098	0.100558	-8.6825	3.87159e-18	4.09341e-16	ENSMUSG00000039929.14	Urb1	426.382	434.049	445.773	766.001	834.081	798.329
1366.098623470361	0.980912	0.113306	-8.65717	4.83633e-18	5.07185e-16	ENSMUSG00000026185.8	Igfbp5	1009.6	947.015	798.917	2023.78	1887.94	1529.33
761.4079307167901	-1.06977	0.123584	8.65622	4.87684e-18	5.07309e-16	ENSMUSG00000031438.11	Rnf128	991.76	1176.37	923.386	420.772	495.405	560.754
877.7172626610809	0.893165	0.103611	-8.62037	6.67373e-18	6.8321e-16	ENSMUSG00000034311.3	Kif4	628.303	542.561	676.378	1212.46	1075.48	1131.13
4694.691695149025	-0.660935	0.0766655	8.62102	6.63584e-18	6.8321e-16	ENSMUSG00000032374.14	Plod2	5458.44	6132.58	5664.79	3480.24	3545.3	3886.8
695.5116822420914	-0.923962	0.107374	8.60511	7.62431e-18	7.74378e-16	ENSMUSG00000035873.8	Pawr	951.376	969.211	811.461	458.543	475.588	506.891
307.78631899236325	2.74468	0.319218	-8.59814	8.10202e-18	8.12016e-16	ENSMUSG00000002325.15	Irf9	89.2209	47.6796	103.242	496.314	605.294	504.967
798.984790728447	0.806328	0.0937823	-8.59787	8.12079e-18	8.12016e-16	ENSMUSG00000007080.14	Pole	594.493	563.112	587.61	1062.88	1012.43	973.384
475.18959869262716	-1.12945	0.131696	8.57621	9.80513e-18	9.72896e-16	ENSMUSG00000031827.13	Cotl1	657.417	730.813	574.101	303.681	250.404	334.721
207.8622263590744	-1.8957	0.221272	8.56727	1.05971e-17	1.04345e-15	ENSMUSG00000047281.3	Sfn	267.663	438.159	277.884	69.4991	75.6618	118.307
1152.546105581508	-0.93435	0.109321	8.54686	1.2648e-17	1.22667e-15	ENSMUSG00000034205.16	Loxl2	1399.36	1730.44	1403.89	699.524	839.486	842.574
1966.3569602139	-0.722835	0.0845663	8.54756	1.25722e-17	1.22667e-15	ENSMUSG00000038296.14	Galnt18	2293.45	2512.22	2531.83	1377.9	1601.51	1481.24
759.5052044309448	0.888942	0.104521	-8.50495	1.81674e-17	1.74882e-15	ENSMUSG00000029414.11	Kntc1	518.42	478.44	602.083	994.139	994.412	969.537
1255.3500261437082	0.758173	0.0891811	-8.5015	1.87151e-17	1.7882e-15	ENSMUSG00000004880.11	Lbr	978.612	849.19	974.525	1627.94	1518.64	1583.19
977.1960222093784	-0.849769	0.100639	8.4437	3.07448e-17	2.89472e-15	ENSMUSG00000022564.7	Grina	1246.27	1395.04	1132.76	719.92	659.338	709.84
325.4098505045982	-1.1437	0.135443	8.44412	3.06345e-17	2.89472e-15	ENSMUSG00000030717.9	Nupr1	503.393	426.65	415.862	210.008	194.559	201.987
3485.900050359384	-0.834573	0.0993447	8.40078	4.4351e-17	4.14553e-15	ENSMUSG00000022010.19	Tsc22d1	4283.54	5090.21	4035.11	2555.6	2206.8	2744.14
575.901973168883	0.944166	0.112701	-8.37766	5.39926e-17	5.01043e-15	ENSMUSG00000056394.17	Lig1	392.572	406.921	383.056	840.788	753.015	679.061
307.7343513575619	1.17861	0.14081	-8.37022	5.75127e-17	5.29897e-15	ENSMUSG00000038668.14	Lpar1	191.59	169.345	204.554	450.989	455.772	374.157
792.2020532610575	0.827472	0.0991101	-8.34902	6.88323e-17	6.29694e-15	ENSMUSG00000036202.16	Rif1	579.466	526.12	609.802	988.851	974.596	1074.38
672.2547280695214	0.973943	0.117179	-8.31157	9.44415e-17	8.51888e-15	ENSMUSG00000033952.14	Aspm	513.724	385.547	462.176	936.727	918.75	816.604
152.2036789113566	1.7445	0.209878	-8.31199	9.41128e-17	8.51888e-15	ENSMUSG00000026712.3	Mrc1	63.8634	50.9678	95.5227	240.981	252.206	209.682
2781.2729965857066	0.788604	0.094944	-8.30599	9.89905e-17	8.86721e-15	ENSMUSG00000091405.2	H4c14	2072.74	1828.27	2219.21	3849.65	3583.13	3134.64
11644.033777827543	-0.613908	0.0739939	8.29674	1.07009e-16	9.51941e-15	ENSMUSG00000039405.7	Prss23	13520.2	15343.8	13392.5	9594.65	9050.59	8962.45
601.5369488895825	0.979544	0.118214	-8.2862	1.16926e-16	1.03304e-14	ENSMUSG00000027951.16	Adar	433.895	378.148	399.459	808.305	900.736	688.679
2250.7818317162028	0.784593	0.0951505	-8.24582	1.64035e-16	1.42966e-14	ENSMUSG00000049932.3	H2ax	1737.46	1764.14	1452.14	2740.68	3150.77	2659.49
2160.0015085352347	0.721314	0.0874749	-8.24595	1.63848e-16	1.42966e-14	ENSMUSG00000041859.10	Mcm3	1666.08	1469.02	1758.97	2807.91	2741.84	2516.18
5238.372220544202	-0.745533	0.0904555	8.24198	1.69384e-16	1.46636e-14	ENSMUSG00000024074.8	Crim1	6428.6	7433.91	5823.99	3717.45	3860.55	4165.74
2308.6456251468153	0.924269	0.112207	-8.23715	1.76354e-16	1.51653e-14	ENSMUSG00000034349.14	Smc4	1595.64	1300.5	1889.23	3147.1	2747.24	3172.16
744.4061270693493	0.858439	0.10435	-8.22653	1.92721e-16	1.63546e-14	ENSMUSG00000028068.14	Iqgap3	534.386	529.408	524.893	1056.84	961.986	858.925
482.3589461507616	-1.22002	0.148294	8.22704	1.919e-16	1.63546e-14	ENSMUSG00000033788.15	Dysf	644.269	818.774	564.452	271.198	254.007	341.454
574.668324055468	-0.863395	0.10505	8.21892	2.05352e-16	1.73126e-14	ENSMUSG00000075705.12	Msrb1	761.664	765.34	695.676	395.843	419.743	409.745
38.96082186357416	4.22272	0.514707	-8.20412	2.32289e-16	1.94565e-14	ENSMUSG00000054072.12	Iigp1	3.75667	3.28825	4.82438	83.8522	91.875	46.1684
770.2618281312929	-0.769502	0.0938348	8.2006	2.39193e-16	1.99055e-14	ENSMUSG00000027472.14	Pdrg1	941.984	998.805	973.56	586.21	560.258	560.754
988.8702676795754	1.07942	0.131802	-8.18968	2.61915e-16	2.16566e-14	ENSMUSG00000052316.9	Lrrc15	710.949	475.152	720.762	1222.28	1356.51	1447.57
895.7924277259713	1.94931	0.238148	-8.18528	2.71666e-16	2.23198e-14	ENSMUSG00000026104.14	Stat1	342.796	320.604	441.913	1556.93	1642.94	1069.57
669.7884494277827	-1.01304	0.12384	8.18022	2.83328e-16	2.29852e-14	ENSMUSG00000018800.14	Abca5	818.014	1074.43	792.163	428.326	457.574	448.218
1451.6623087669573	-0.911954	0.111477	8.18066	2.82299e-16	2.29852e-14	ENSMUSG00000028370.7	Pappa	1740.28	2185.86	1762.83	921.619	940.368	1159.02
5596.926057403131	-0.767466	0.0939371	8.17	3.08394e-16	2.48623e-14	ENSMUSG00000031740.8	Mmp2	6612.67	8251.86	6288.1	4229.62	4188.42	4010.88
9512.741573266094	-0.498513	0.0613095	8.13109	4.25448e-16	3.38756e-14	ENSMUSG00000037706.17	Cd81	10903.7	11349.4	11166.5	7859.44	7895.85	7901.53
11496.11138422567	0.533525	0.0656104	-8.13171	4.23271e-16	3.38756e-14	ENSMUSG00000039630.10	Hnrnpu	9788.94	9028.71	9369.91	14066.8	13249.8	13472.5
520.4646491720757	0.927523	0.114302	-8.11464	4.87239e-16	3.85576e-14	ENSMUSG00000006585.3	Cdt1	361.579	364.995	345.426	664.774	765.625	620.388
383.91579496047325	1.31538	0.162127	-8.1133	4.92614e-16	3.87453e-14	ENSMUSG00000010358.13	Ifi35	226.339	208.804	220.957	497.825	720.588	428.982
175.90440667222094	-1.65271	0.204398	8.08575	6.17832e-16	4.82995e-14	ENSMUSG00000038677.14	Scube3	246.062	308.273	251.833	114.069	63.0515	72.1382
1098.374005375474	-0.76825	0.0952049	8.06944	7.06237e-16	5.4878e-14	ENSMUSG00000013698.12	Pea15a	1432.23	1281.59	1437.67	750.892	810.662	877.2
58.408005134644164	-2.63587	0.326975	8.06139	7.54346e-16	5.82653e-14	ENSMUSG00000057123.14	Gja5	90.16	118.377	95.5227	21.1519	10.8088	14.4276
215.9131155872292	1.53494	0.190692	-8.04929	8.32733e-16	6.3937e-14	ENSMUSG00000052957.8	Gas1	118.335	105.224	109.031	394.332	338.677	229.88
1719.4068252186046	0.605451	0.0756364	-8.00475	1.19706e-15	9.13658e-14	ENSMUSG00000025047.9	Pdcd11	1347.7	1399.15	1346	2095.55	2030.26	2097.78
1053.6910135008002	-0.906287	0.113326	7.99717	1.27313e-15	9.66004e-14	ENSMUSG00000020432.12	Tcn2	1368.37	1590.69	1159.78	682.149	758.419	762.741
206.4322744164809	-1.68215	0.211	7.97225	1.55811e-15	1.17086e-13	ENSMUSG00000035775.2	Krt20	289.263	396.234	261.481	83.0968	73.8603	134.658
1063.1044444147315	0.783477	0.0982786	-7.972	1.56127e-15	1.17086e-13	ENSMUSG00000036103.9	Colec12	758.847	712.728	872.248	1378.65	1396.14	1260.01
1279.9732746707436	-0.703003	0.0883216	7.95959	1.72615e-15	1.28703e-13	ENSMUSG00000048096.7	Lmod1	1622.88	1629.33	1512.93	1040.22	895.331	979.155
1328.5249918592156	0.748525	0.0940655	-7.95749	1.75565e-15	1.30151e-13	ENSMUSG00000028693.15	Nasp	1057.5	877.14	1044	1745.03	1583.49	1663.99
115.15724051358085	-1.89114	0.237768	7.9537	1.81023e-15	1.32737e-13	ENSMUSG00000042842.11	Serpinb6b	135.24	217.846	190.081	41.5484	50.4412	55.7868
1541.9177538060446	0.669569	0.084184	-7.95364	1.81112e-15	1.32737e-13	ENSMUSG00000026923.15	Notch1	1174.9	1187.88	1205.13	1936.91	2008.64	1738.05
4623.679697852958	0.889043	0.112076	-7.93247	2.14837e-15	1.56564e-13	ENSMUSG00000105827.1	H2bc18	3351.89	2563.19	3817.05	6467.19	5633.2	5909.56
1200.2090866773071	-1.00826	0.127158	7.92918	2.20602e-15	1.59862e-13	ENSMUSG00000029223.12	Uchl1	1501.73	1981.17	1327.67	750.137	756.618	883.933
395.34765903307164	1.19594	0.151098	-7.915	2.47251e-15	1.78173e-13	ENSMUSG00000024621.16	Csf1r	232.913	196.473	289.463	518.977	648.53	485.73
429.3038246472108	0.977675	0.123728	-7.90183	2.74843e-15	1.96956e-13	ENSMUSG00000037572.17	Wdhd1	308.986	246.619	312.62	576.389	580.074	551.136
957.1772654259265	-0.698716	0.0885552	7.89017	3.01773e-15	2.15059e-13	ENSMUSG00000055737.12	Ghr	1194.62	1192.81	1161.71	698.013	762.022	733.886
688.166125668168	0.808539	0.10252	-7.88664	3.10432e-15	2.20015e-13	ENSMUSG00000038644.14	Pold1	489.306	512.145	496.911	905.755	931.361	793.52
628.1997355600924	0.966142	0.122648	-7.87735	3.34388e-15	2.35698e-13	ENSMUSG00000058290.4	Espl1	426.382	391.301	459.281	938.238	855.699	698.297
3458.49819204236	0.602573	0.0765219	-7.87451	3.42074e-15	2.39805e-13	ENSMUSG00000007029.16	Vars	2686.02	2951.2	2597.45	4142.75	4355.96	4017.61
142.44607348495873	1.50189	0.190911	-7.86698	3.63294e-15	2.53304e-13	ENSMUSG00000028270.12	Gbp2	77.0117	64.1208	81.0496	202.454	239.596	190.445
12744.884402326772	-0.691783	0.0881172	7.85072	4.13657e-15	2.86869e-13	ENSMUSG00000039361.11	Picalm	16253.2	15376.7	15605.9	9003.91	8944.3	11285.3
226.72978425233114	-1.16495	0.148751	7.83154	4.81912e-15	3.32416e-13	ENSMUSG00000024395.9	Lims2	308.047	323.892	308.76	146.552	142.316	130.811
1400.7658523278474	0.658333	0.0840832	-7.82955	4.8963e-15	3.35944e-13	ENSMUSG00000024613.16	Tcof1	1056.56	1050.6	1153.99	1786.58	1715	1641.86
2685.9916600308056	0.63122	0.0807267	-7.81922	5.3152e-15	3.62756e-13	ENSMUSG00000026355.11	Mcm6	2098.1	1955.69	2266.49	3235.49	3439.01	3121.18
99.37501415645765	1.89718	0.243132	-7.8031	6.04054e-15	4.10089e-13	ENSMUSG00000027322.11	Siglec1	42.2625	30.4163	54.0331	172.992	165.735	130.811
556.2936445739366	0.863591	0.110833	-7.79183	6.60476e-15	4.46046e-13	ENSMUSG00000001918.17	Slc1a5	401.024	364.995	418.756	765.246	725.993	661.747
986.1172677995793	-2.26182	0.290419	7.78811	6.80202e-15	4.56975e-13	ENSMUSG00000031972.5	Acta1	1557.14	1989.39	1347.93	236.448	354.89	430.905
55.1226209298193	-2.66563	0.342458	7.78381	7.0372e-15	4.70325e-13	ENSMUSG00000039376.13	Synpo2l	87.3425	121.665	78.155	17.3748	10.8088	15.3895
1346.119707734589	0.64429	0.0827875	-7.78246	7.11266e-15	4.72919e-13	ENSMUSG00000036862.15	Dchs1	1029.33	1062.93	1061.36	1736.72	1605.11	1581.27
140.61930647823482	1.99638	0.256577	-7.78081	7.20615e-15	4.76678e-13	ENSMUSG00000035258.15	Abi3bp	63.8634	41.9252	64.6467	319.545	201.765	151.971
4180.072099057751	0.520681	0.0671234	-7.75707	8.69145e-15	5.71995e-13	ENSMUSG00000029657.15	Hsph1	3452.38	3385.25	3468.73	5015.27	4736.07	5022.74
106.35731236479417	-1.96405	0.253263	7.75497	8.83637e-15	5.78581e-13	ENSMUSG00000027574.15	Nkain4	130.544	205.515	168.853	30.9724	52.2427	50.0158
1230.6945784379939	0.830185	0.107082	-7.7528	8.98883e-15	5.8559e-13	ENSMUSG00000017009.3	Sdc4	944.802	770.272	947.508	1773.74	1491.62	1456.23
67.34825554079079	2.58548	0.334488	-7.72967	1.07826e-14	6.95422e-13	ENSMUSG00000040253.15	Gbp7	18.7833	18.9074	19.2975	118.602	162.132	66.3671
1630.6104830604231	0.788988	0.102068	-7.73	1.07547e-14	6.95422e-13	ENSMUSG00000050335.17	Lgals3	1308.26	1200.21	1080.66	2341.06	1994.23	1859.24
68.5941928184085	-2.78256	0.361976	7.68714	1.50457e-14	9.60764e-13	ENSMUSG00000037813.13	D630003M21Rik	81.7075	186.608	91.6632	21.9073	16.2132	13.4658
35025.328280366855	-0.592844	0.0771208	7.68721	1.50375e-14	9.60764e-13	ENSMUSG00000032366.15	Tpm1	42508.6	44125.8	39738.4	27020.8	26058.3	30700.1
484.1614908810327	-0.882959	0.114947	7.68146	1.57288e-14	9.99435e-13	ENSMUSG00000031176.8	Dynlt3	629.242	631.344	626.205	377.713	327.868	312.599
307.85897006304435	-1.10615	0.144281	7.66668	1.76502e-14	1.11603e-12	ENSMUSG00000028226.15	Mmp16	367.214	474.33	421.651	191.123	178.346	214.491
186.76704166638456	1.5809	0.206267	-7.66432	1.79784e-14	1.13124e-12	ENSMUSG00000049001.5	Ndnf	110.822	67.4091	105.171	350.517	226.985	259.697
585.4679384796152	0.79043	0.103608	-7.62903	2.36532e-14	1.48108e-12	ENSMUSG00000051378.10	Kif18b	403.842	430.76	450.597	733.518	774.633	719.458
1505.5061514047534	-0.8533	0.111907	7.6251	2.43852e-14	1.51954e-12	ENSMUSG00000063531.7	Sema3e	1809.77	2255.74	1756.07	1094.61	924.155	1192.68
46917.10139090498	-0.630359	0.0828101	7.6121	2.69668e-14	1.67233e-12	ENSMUSG00000032085.5	Tagln	55022	62010.6	53981.9	33006.8	37726.4	39754.9
127.01441316637188	-1.85136	0.243647	7.59853	2.99505e-14	1.84847e-12	ENSMUSG00000045284.9	Dcaf12l1	179.381	267.992	147.626	46.0809	59.4485	61.5579
963.0772239768667	0.782952	0.103058	-7.59716	3.02689e-14	1.85923e-12	ENSMUSG00000031403.14	Dkc1	686.531	627.233	812.426	1230.59	1194.38	1227.31
139.1348575631989	-1.48035	0.19529	7.5803	3.44767e-14	2.10765e-12	ENSMUSG00000037440.8	Vnn1	196.286	236.754	181.397	76.2979	73.8603	70.2145
288.6977502471693	2.6261	0.346572	-7.57735	3.52688e-14	2.14591e-12	ENSMUSG00000047735.14	Samd9l	75.1334	58.3664	108.066	532.575	608.897	349.149
5320.870735414552	0.531549	0.0701923	-7.57275	3.65405e-14	2.21285e-12	ENSMUSG00000042699.11	Dhx9	4351.16	4190.87	4518.51	6323.66	5975.48	6565.53
354.8258952781083	-0.940079	0.124315	7.56206	3.96748e-14	2.39143e-12	ENSMUSG00000059970.7	Hspa2	464.888	494.059	440.948	240.225	237.794	251.041
520.1947471753504	-1.00923	0.133476	7.56112	3.99607e-14	2.39745e-12	ENSMUSG00000017817.11	Jph2	631.12	806.443	639.713	323.322	408.934	311.637
1108.9200490001047	0.775185	0.10257	-7.55759	4.10605e-14	2.45203e-12	ENSMUSG00000100210.2	H3c7	883.756	731.635	835.583	1401.31	1540.26	1260.98
914.0526463424644	0.806343	0.10675	-7.55356	4.23526e-14	2.51754e-12	ENSMUSG00000025001.11	Hells	655.539	581.198	762.252	1197.35	1095.29	1192.68
267.7209656887578	-1.16297	0.154013	7.55113	4.31489e-14	2.55311e-12	ENSMUSG00000030616.16	Sytl2	365.336	410.209	338.671	160.906	136.912	194.292
1241.2905320133557	0.781447	0.103504	-7.54992	4.35533e-14	2.56527e-12	ENSMUSG00000024691.13	Fam111a	935.41	775.204	1032.42	1631.72	1504.23	1568.76
41.109614736200044	2.95314	0.391799	-7.53737	4.79532e-14	2.79886e-12	ENSMUSG00000073489.6	Ifi204	7.51334	9.04268	11.5785	80.8305	82.8677	54.825
1290.0817483909973	-0.703739	0.0933618	7.53776	4.78108e-14	2.79886e-12	ENSMUSG00000020032.14	Nuak1	1465.1	1779.76	1548.63	966.944	998.015	982.041
2422.9028760043125	0.553204	0.0734834	-7.52829	5.14085e-14	2.98702e-12	ENSMUSG00000052533.14	Nup188	1953.47	1918.69	2016.59	2869.86	3004.85	2773.95
474.2586291160981	-0.878286	0.116928	7.51134	5.85236e-14	3.38519e-12	ENSMUSG00000039007.10	Cpq	559.744	675.735	607.872	340.697	329.669	331.836
160.60198548564728	-1.59653	0.212621	7.50879	5.96754e-14	3.4364e-12	ENSMUSG00000021798.14	Ldb3	228.218	287.722	206.483	58.1677	81.0662	101.955
980.1678372189199	0.81872	0.109123	-7.50271	6.25097e-14	3.57118e-12	ENSMUSG00000040084.9	Bub1b	714.706	610.792	806.636	1356.74	1176.36	1215.77
6956.360279529081	-0.576201	0.0768003	7.50259	6.25698e-14	3.57118e-12	ENSMUSG00000021477.9	Ctsl	8118.16	9102.69	7761.46	5452.66	5478.27	5824.92
369.36895189563586	-1.33478	0.178014	7.49816	6.4718e-14	3.67752e-12	ENSMUSG00000050777.7	Tmem37	477.097	711.084	395.599	200.943	232.39	199.101
826.1923199020015	0.801757	0.106981	-7.49436	6.6621e-14	3.76905e-12	ENSMUSG00000002055.9	Spag5	595.432	530.23	685.062	1096.88	994.412	1055.14
33.741519553292804	3.42746	0.457777	-7.48717	7.03754e-14	3.96407e-12	ENSMUSG00000020638.8	Cmpk2	4.69583	7.39856	4.82438	63.4557	72.0588	50.0158
510.85731019445643	-0.827585	0.110617	7.48154	7.34578e-14	4.1197e-12	ENSMUSG00000047547.14	Cltb	694.044	662.582	604.012	362.604	363.897	378.004
919.6433312088493	0.914788	0.122299	-7.47994	7.43562e-14	4.15204e-12	ENSMUSG00000017493.12	Igfbp4	648.025	605.86	658.045	1370.34	1286.25	949.338
1783.3976627643642	-0.69912	0.0936553	7.46482	8.34155e-14	4.63783e-12	ENSMUSG00000051579.10	Tceal8	2151.63	2227.79	2253.95	1407.36	1160.15	1499.51
307.4293679731011	1.24021	0.166196	-7.46232	8.50113e-14	4.70627e-12	ENSMUSG00000067455.5	H4c11	237.609	173.455	137.012	447.212	453.971	395.317
231.83643978955416	-1.40232	0.18806	7.45679	8.86564e-14	4.88709e-12	ENSMUSG00000020782.18	Llgl2	344.674	413.497	252.798	120.113	109.89	150.047
1493.5941183200744	0.737873	0.0990026	-7.45307	9.11952e-14	5.00565e-12	ENSMUSG00000031538.6	Plat	1112.91	967.567	1279.43	1853.06	1909.56	1839.04
2677.473854158538	0.591479	0.0795807	-7.43245	1.06608e-13	5.82687e-12	ENSMUSG00000035726.8	Supt16	2174.17	1953.22	2284.83	3244.55	3129.16	3278.92
346.5928732089392	0.927783	0.12488	-7.42941	1.09081e-13	5.93683e-12	ENSMUSG00000017146.12	Brca1	241.366	220.313	254.727	440.413	462.978	459.761
214.7838130686789	3.05515	0.412164	-7.41246	1.23981e-13	6.71947e-12	ENSMUSG00000022906.15	Parp9	51.6542	27.128	59.8223	413.973	477.39	258.736
5277.01819993048	-0.706821	0.0954022	7.40885	1.27399e-13	6.8758e-12	ENSMUSG00000027966.20	Col11a1	6643.67	7374.72	5606.89	3880.62	4341.55	3814.67
4217.580917758556	0.576612	0.0778897	-7.40293	1.33207e-13	7.15935e-12	ENSMUSG00000020075.8	Ddx21	3345.31	3229.06	3590.3	5158.04	4653.2	5329.57
9831.271029639554	-0.58838	0.0795799	7.39357	1.42937e-13	7.65042e-12	ENSMUSG00000028464.16	Tpm2	11528.3	13093.8	10807.6	8123.09	7567.98	7866.91
628.677439033923	0.855719	0.115786	-7.39053	1.46248e-13	7.79528e-12	ENSMUSG00000042029.7	Ncapg2	448.922	383.903	512.349	849.853	785.441	791.596
899.1568142908811	2.39058	0.324201	-7.37375	1.65898e-13	8.80623e-12	ENSMUSG00000064215.13	Ifi27	304.29	180.854	379.196	1479.88	1747.43	1303.3
285.3584634713907	1.0408	0.141165	-7.37298	1.66854e-13	8.82071e-12	ENSMUSG00000023066.10	Rttn	185.016	166.057	211.308	406.419	356.691	386.661
469.1464524587103	0.973918	0.132447	-7.35327	1.93413e-13	1.0183e-11	ENSMUSG00000024079.4	Eif2ak2	340.918	281.967	325.163	654.954	695.368	516.509
652.0805060423444	-0.940938	0.128124	7.34397	2.07346e-13	1.08722e-11	ENSMUSG00000005357.9	Slc1a6	792.657	1044.02	735.236	440.413	441.36	458.799
3488.784934204717	-0.63459	0.086569	7.33045	2.2938e-13	1.19788e-11	ENSMUSG00000099104.1	Gm17087	4419.72	4345.42	3977.22	3046.63	2484.23	2659.49
45.66822074342961	2.91071	0.39712	-7.32955	2.30927e-13	1.2011e-11	ENSMUSG00000054404.13	Slfn5	10.3308	9.04268	12.5434	86.8739	108.088	47.1303
1247.4842358879664	0.6006	0.08207	-7.31814	2.51438e-13	1.29732e-11	ENSMUSG00000005370.4	Msh6	978.612	966.745	1030.49	1537.29	1493.42	1478.35
49.80615684778512	-2.64447	0.361352	7.31826	2.51202e-13	1.29732e-11	ENSMUSG00000021057.15	Akap5	77.0117	106.868	72.3657	9.0651	16.2132	17.3132
369.627222744531	0.954418	0.13069	-7.3029	2.81636e-13	1.44734e-11	ENSMUSG00000020534.14	Shmt1	276.115	216.202	261.481	464.586	524.228	475.15
297.0325202528057	-0.976069	0.134035	7.2822	3.28415e-13	1.68104e-11	ENSMUSG00000027171.10	Prrg4	398.207	376.504	409.107	196.411	185.552	216.414
133.59410060135266	-1.44494	0.198476	7.28021	3.33311e-13	1.69936e-11	ENSMUSG00000020154.10	Ptprb	175.624	193.185	219.992	72.5208	59.4485	80.7947
897.01835282462	0.681431	0.0936142	-7.27915	3.35938e-13	1.70601e-11	ENSMUSG00000024660.9	Incenp	706.254	651.895	711.114	1171.66	1089.89	1051.29
114.50974279979032	3.51373	0.483683	-7.26453	3.74347e-13	1.89361e-11	ENSMUSG00000029371.7	Cxcl5	23.4792	9.04268	23.157	281.018	208.971	141.391
9499.462833944115	-0.442403	0.0609567	7.25766	3.93856e-13	1.98451e-11	ENSMUSG00000000184.12	Ccnd2	10792	11121.7	10921.4	8067.94	7993.13	8100.64
40.54240944479705	3.3902	0.467668	-7.24915	4.19395e-13	2.10497e-11	ENSMUSG00000052776.10	Oas1a	8.4525	4.11031	8.68388	89.1402	97.2794	35.5882
2157.6743157650817	0.617629	0.0854338	-7.22934	4.85359e-13	2.42661e-11	ENSMUSG00000022142.8	Nup155	1624.76	1603.84	1884.4	2694.6	2477.02	2661.42
129.90052469232253	1.44321	0.199906	-7.21941	5.22141e-13	2.60042e-11	ENSMUSG00000038963.15	Slco4a1	66.6809	80.5621	62.7169	183.568	167.537	218.338
1746.8163735504138	-0.712091	0.0986822	7.216	5.35375e-13	2.65608e-11	ENSMUSG00000025743.14	Sdc3	2151.63	2427.55	1934.58	1337.1	1199.78	1430.26
295.2761188729397	1.05301	0.145968	-7.21395	5.4353e-13	2.6862e-11	ENSMUSG00000028487.18	Bnc2	195.347	157.836	222.886	381.49	419.743	394.355
4645.467663117831	0.560197	0.0778994	-7.19129	6.41835e-13	3.15993e-11	ENSMUSG00000007850.16	Hnrnph1	3852.46	3404.98	4010.02	5727.63	5469.27	5408.44
449.0185936004721	-0.881134	0.122668	7.18307	6.81644e-13	3.34317e-11	ENSMUSG00000061436.15	Hipk2	595.432	610.792	539.366	285.551	308.052	354.92
258.86851809784093	-1.07112	0.14913	7.18241	6.84948e-13	3.34665e-11	ENSMUSG00000056492.6	Adgrf5	372.849	341.978	343.496	179.791	133.309	181.788
679.2115226509868	0.7523	0.104797	-7.17862	7.04198e-13	3.42772e-11	ENSMUSG00000035024.16	Ncapd3	522.177	451.312	544.19	849.853	886.324	821.413
658.4461497733291	-0.765285	0.10664	7.17632	7.16115e-13	3.47262e-11	ENSMUSG00000075702.9	Selenom	821.771	902.624	764.182	475.162	466.581	520.357
54024.906851896114	0.591845	0.0824817	-7.17547	7.20598e-13	3.48127e-11	ENSMUSG00000029661.16	Col1a2	43888.2	40531.8	44864.8	67383.2	70324	57157.5
1991.6177468976216	0.604557	0.0842932	-7.17207	7.38725e-13	3.55553e-11	ENSMUSG00000024054.14	Smchd1	1640.72	1492.86	1614.24	2467.22	2190.59	2544.07
11410.095863340423	-0.568148	0.0793466	7.16033	8.04843e-13	3.85936e-11	ENSMUSG00000058056.16	Palld	13528.7	14930.3	12428.6	9056.79	8807.39	9708.84
716.5165140349629	0.891443	0.124534	-7.15822	8.17295e-13	3.90455e-11	ENSMUSG00000099517.2	H3c8	543.778	401.988	561.558	994.895	947.574	849.307
2838.635737635555	-0.630795	0.0882201	7.15024	8.66271e-13	4.12326e-11	ENSMUSG00000019768.16	Esr1	3202.56	3912.19	3235.23	2270.81	2168.97	2242.05
901.7112002155708	0.728909	0.10214	-7.13638	9.58231e-13	4.5442e-11	ENSMUSG00000044783.16	Hjurp	657.417	637.098	742.955	1216.99	1129.52	1026.29
826.2308466706619	0.694081	0.0972724	-7.13543	9.6484e-13	4.55878e-11	ENSMUSG00000029730.16	Mcm7	590.736	619.013	686.992	1057.6	970.993	1032.06
2001.7598220039013	0.753786	0.105766	-7.12692	1.0264e-12	4.81435e-11	ENSMUSG00000056427.10	Slit3	1528.02	1313.65	1628.71	2708.2	2698.6	2133.37
1079.6369384338816	-0.839371	0.117772	7.12706	1.02539e-12	4.81435e-11	ENSMUSG00000058914.12	C1qtnf3	1291.35	1385.17	1477.23	877.048	830.478	616.541
47.59716597519905	-2.45982	0.34568	7.11588	1.11203e-12	5.19715e-11	ENSMUSG00000022860.15	Chodl	74.1942	94.5371	73.3306	13.5977	12.6103	17.3132
82.29671264244371	-1.81434	0.255246	7.1082	1.17568e-12	5.47477e-11	ENSMUSG00000026564.9	Dusp27	113.639	153.726	116.75	33.2387	36.0294	40.3974
814.9421151422691	0.755993	0.10639	-7.10584	1.19589e-12	5.54884e-11	ENSMUSG00000040675.17	Mthfd1l	598.249	548.315	670.589	1046.26	1097.1	929.14
1142.6203951212494	0.649086	0.0913602	-7.10469	1.20591e-12	5.57527e-11	ENSMUSG00000033166.11	Dis3	865.912	838.503	968.736	1398.29	1322.28	1462
618.8184097839757	-0.754797	0.10656	7.08329	1.40768e-12	6.48489e-11	ENSMUSG00000024899.7	Papss2	762.604	836.037	733.306	488.76	459.375	432.829
2083.488454168894	-0.627579	0.0886227	7.08147	1.42634e-12	6.54747e-11	ENSMUSG00000036751.7	Cox6b1	2470.95	2707.87	2417.01	1813.02	1534.85	1557.22
965.1875614601722	-0.784946	0.110972	7.0734	1.51183e-12	6.91528e-11	ENSMUSG00000036599.10	Chst12	1123.24	1436.14	1105.75	698.768	682.758	744.466
1266.0938521574253	0.69595	0.0986731	-7.05308	1.74997e-12	7.94821e-11	ENSMUSG00000030867.7	Plk1	982.369	873.03	1048.82	1727.66	1484.41	1480.28
856.5184126397725	0.947903	0.134387	-7.05356	1.74403e-12	7.94821e-11	ENSMUSG00000114279.1	H2bc14	583.223	467.753	701.465	1102.17	1302.46	982.041
3249.3850746541566	0.532126	0.0755098	-7.04712	1.82665e-12	8.26736e-11	ENSMUSG00000038759.15	Nup205	2609.95	2564.83	2802	4051.34	3637.17	3831.02
580.351843927141	0.782535	0.111056	-7.0463	1.83737e-12	8.28677e-11	ENSMUSG00000048922.18	Cdca2	447.983	378.971	454.457	770.534	738.603	691.565
9335.091642071744	-0.715253	0.10171	7.03229	2.03172e-12	9.13143e-11	ENSMUSG00000068196.5	Col8a1	10420.1	13897	10485.3	7043.58	7576.99	6587.66
64.56162805452281	1.99419	0.283685	-7.02961	2.07112e-12	9.27617e-11	ENSMUSG00000028989.3	Angptl7	26.2967	31.2384	19.2975	101.227	118.897	90.4132
61.71897100316593	-2.20174	0.31348	7.02355	2.16296e-12	9.65401e-11	ENSMUSG00000007908.14	Hmgcll1	96.7342	122.487	87.8037	22.6628	10.8088	29.8171
303.87658191936697	1.19009	0.169498	-7.02123	2.1992e-12	9.78187e-11	ENSMUSG00000025473.16	Adam8	185.016	149.615	220.957	472.141	466.581	328.95
540.09964105636	0.811044	0.115788	-7.00456	2.47767e-12	1.09826e-10	ENSMUSG00000051220.2	Ercc6l	417.929	344.444	417.791	704.812	632.316	723.305
2624.718130736702	-0.545702	0.077984	6.99762	2.60355e-12	1.15011e-10	ENSMUSG00000013160.7	Atp6v0d1	3042.9	3303.04	2995.94	2015.47	2167.17	2223.78
387.39328356260853	-1.13371	0.163104	6.95082	3.63177e-12	1.59885e-10	ENSMUSG00000001864.13	Aif1l	541.899	658.472	393.669	220.584	255.809	253.926
361.80710468960314	1.10488	0.159035	-6.94742	3.72035e-12	1.63227e-10	ENSMUSG00000037370.13	Enpp1	234.792	175.099	282.709	522.754	419.743	535.746
2201.729688282606	-0.57418	0.0826646	6.94591	3.76041e-12	1.64425e-10	ENSMUSG00000005161.15	Prdx2	2609.01	2858.31	2438.24	1824.35	1707.79	1772.68
1419.5373403282397	-0.624913	0.0900692	6.93814	3.973e-12	1.73134e-10	ENSMUSG00000024423.6	Impact	1726.19	1800.32	1641.25	1044.75	1075.48	1229.23
54.27609485794979	2.2068	0.318102	-6.93738	3.99439e-12	1.7348e-10	ENSMUSG00000022425.16	Enpp2	20.6617	15.6192	22.1921	109.537	86.4706	71.1763
2828.747828148884	-0.560418	0.080864	6.93037	4.19736e-12	1.81076e-10	ENSMUSG00000026223.15	Itm2c	3325.59	3679.55	3110.76	2310.85	2224.82	2320.93
700.7223450142312	0.715048	0.103172	-6.93061	4.1902e-12	1.81076e-10	ENSMUSG00000021952.16	Xpo4	522.177	498.992	567.347	846.831	947.574	821.413
2671.2348942023464	-0.784552	0.113295	6.92485	4.3644e-12	1.87654e-10	ENSMUSG00000052353.13	Cemip	2761.15	3866.16	3509.25	2072.13	2109.52	1709.19
842.1614279957313	0.697565	0.10076	-6.92306	4.41998e-12	1.89413e-10	ENSMUSG00000001228.14	Uhrf1	688.409	595.173	644.537	1110.47	1059.27	955.109
729.4176374045663	0.824368	0.119247	-6.9131	4.74175e-12	2.02529e-10	ENSMUSG00000030677.8	Kif22	547.534	438.159	598.223	1010.76	857.5	924.33
579.2811475974232	-2.4691	0.357376	6.90897	4.88181e-12	2.07823e-10	ENSMUSG00000034981.9	Parm1	844.311	1278.31	823.039	151.085	127.904	251.041
368.83516455144985	-0.939656	0.136038	6.90729	4.94e-12	2.09609e-10	ENSMUSG00000029030.14	Tprgl	484.61	477.618	499.806	261.377	198.162	291.438
496.49624832945443	-0.859759	0.124499	6.90574	4.9942e-12	2.11214e-10	ENSMUSG00000030468.12	Siglecg	586.04	724.237	612.696	339.186	322.463	394.355
3187.1986196689218	-0.537474	0.0778914	6.9003	5.1894e-12	2.18142e-10	ENSMUSG00000018567.14	Gabarap	3883.46	3651.6	3797.75	2665.89	2370.74	2753.75
3773.0766153657687	0.52764	0.0764669	-6.90023	5.19184e-12	2.18142e-10	ENSMUSG00000040549.16	Ckap5	3145.27	2883.79	3249.7	4655.68	4206.44	4497.57
607.501879836007	-0.790386	0.114642	6.89439	5.40979e-12	2.26561e-10	ENSMUSG00000020325.10	Fstl3	759.786	868.097	684.097	459.298	419.743	453.99
420.60468558090196	0.797874	0.115764	-6.89227	5.49106e-12	2.29221e-10	ENSMUSG00000026034.17	Clk1	307.108	297.586	314.55	518.977	574.669	510.738
40.88458103286673	3.246	0.471043	-6.89109	5.53646e-12	2.3037e-10	ENSMUSG00000026222.16	Sp100	7.51334	3.28825	12.5434	67.2328	115.294	39.4355
950.784585198768	0.843421	0.122427	-6.88916	5.61217e-12	2.3277e-10	ENSMUSG00000001435.15	Col18a1	650.843	734.101	652.256	1291.02	1406.95	969.537
745.0148413387208	-0.705746	0.102453	6.88848	5.63936e-12	2.33148e-10	ENSMUSG00000026457.14	Adipor1	946.68	905.912	917.597	514.444	560.258	625.197
623.8808380004173	0.69777	0.10132	-6.88679	5.70648e-12	2.35169e-10	ENSMUSG00000072082.7	Ccnf	466.766	498.992	464.105	803.772	729.596	780.054
635.7409197453782	-0.730999	0.106218	6.88205	5.89972e-12	2.42358e-10	ENSMUSG00000036299.5	BC031181	765.421	803.154	815.32	460.054	439.559	530.937
350.21233006041746	0.917591	0.133341	-6.88155	5.92033e-12	2.42433e-10	ENSMUSG00000046805.10	Mpeg1	229.157	221.135	275.955	459.298	495.405	420.325
1682.995716080024	-0.842532	0.122446	6.88087	5.94863e-12	2.42821e-10	ENSMUSG00000092035.8	Peg10	1814.47	2713.63	1956.77	1264.58	1138.53	1210
407.93335840394843	1.00046	0.145428	-6.87944	6.00881e-12	2.44504e-10	ENSMUSG00000036768.6	Kif15	283.628	207.16	327.093	565.058	526.03	538.632
3279.282440254056	0.494386	0.0719312	-6.87304	6.28495e-12	2.54936e-10	ENSMUSG00000004356.8	Utp20	2809.99	2573.05	2789.46	3891.19	3729.05	3882.96
3554.3233016064423	-0.465623	0.0677747	6.87017	6.41273e-12	2.59303e-10	ENSMUSG00000021759.14	Plpp1	4018.7	4220.47	4132.56	3020.94	2925.59	3007.68
28.456007974971346	4.11805	0.599861	-6.86502	6.64841e-12	2.67993e-10	ENSMUSG00000079017.3	Ifi27l2a	0.939167	1.64412	6.75413	48.3472	77.4633	35.5882
1010.373568642066	-0.82676	0.120455	6.86363	6.71324e-12	2.69763e-10	ENSMUSG00000037946.11	Fgd3	1298.87	1526.57	1053.64	737.295	677.353	768.512
1334.2251907111963	0.67731	0.0989418	-6.84554	7.61873e-12	3.05199e-10	ENSMUSG00000001627.12	Ifrd1	1029.33	945.371	1101.89	1444.37	1749.23	1735.16
1505.8454657915831	-0.617755	0.090284	6.84235	7.7902e-12	3.11102e-10	ENSMUSG00000011256.16	Adam19	1837.01	1945	1686.6	1108.21	1179.96	1278.29
1592.1551614346295	0.638004	0.093294	-6.83865	7.99447e-12	3.18274e-10	ENSMUSG00000090958.2	Lrrc32	1400.3	1142.67	1198.38	2051.73	1842.91	1916.95
31.859128100941717	-3.52728	0.516168	6.8336	8.28076e-12	3.28657e-10	ENSMUSG00000056423.7	Uts2b	42.2625	83.8503	50.1736	4.53255	3.60294	6.7329
1714.5167339580764	0.509273	0.0746542	-6.82176	8.99287e-12	3.55825e-10	ENSMUSG00000095567.8	Noc2l	1427.53	1412.3	1404.86	1991.3	2015.85	2035.26
3549.333795852527	0.487707	0.0715518	-6.81614	9.35169e-12	3.68891e-10	ENSMUSG00000033732.10	Sf3b3	3004.4	2804.05	3058.66	4270.42	4137.98	4020.5
29.40693038768041	5.5452	0.814116	-6.81132	9.67099e-12	3.80324e-10	ENSMUSG00000068245.14	Phf11d	0.939167	0	2.89463	59.6786	79.2647	33.6645
324.5162719370554	-1.12876	0.166448	6.78146	1.18966e-11	4.66427e-10	ENSMUSG00000020846.6	Rflnb	501.515	402.81	433.229	163.927	180.147	265.468
1821.2787131107923	-0.586802	0.0865484	6.78005	1.20138e-11	4.69592e-10	ENSMUSG00000025232.8	Hexa	2176.99	2391.38	1992.47	1455.7	1423.16	1487.97
1716.4032218526613	-0.569258	0.0839707	6.77924	1.20808e-11	4.70784e-10	ENSMUSG00000024012.18	Mtch1	2108.43	2148.87	1889.23	1328.79	1444.78	1378.32
570.2235974264772	3.69218	0.544895	-6.77594	1.23598e-11	4.80207e-10	ENSMUSG00000035692.7	Isg15	73.255	45.2134	127.364	979.031	1536.65	659.824
1020.8458974033229	0.761895	0.1125	-6.7724	1.26664e-11	4.90642e-10	ENSMUSG00000033031.13	Cip2a	783.265	623.123	869.353	1346.17	1226.8	1276.36
130.2730767759664	3.2002	0.472813	-6.76844	1.30178e-11	5.02743e-10	ENSMUSG00000034422.14	Parp14	28.175	13.153	35.7004	293.105	257.61	153.895
360.34082557271864	0.928176	0.137238	-6.76326	1.34921e-11	5.17962e-10	ENSMUSG00000022324.15	Matn2	261.088	210.448	274.025	431.348	464.78	520.357
238.5824285700183	-0.99991	0.147835	6.76368	1.34528e-11	5.17962e-10	ENSMUSG00000022353.10	Mtss1	304.29	350.198	299.112	160.906	162.132	154.857
735.8390628369066	2.21626	0.327951	-6.7579	1.40002e-11	5.35872e-10	ENSMUSG00000029231.15	Pdgfra	289.263	177.565	315.514	1491.21	1255.63	885.857
12228.346508730476	0.594887	0.0881293	-6.75016	1.47678e-11	5.63579e-10	ENSMUSG00000023885.9	Thbs2	10092.3	8357.9	10775.7	14220.1	15366.5	14557.5
1117.9885648206227	-0.716491	0.106155	6.74951	1.48348e-11	5.64467e-10	ENSMUSG00000031530.6	Dusp4	1343.01	1606.31	1221.53	833.234	816.066	887.78
921.6105318398019	0.702825	0.104293	-6.73895	1.5953e-11	6.05228e-10	ENSMUSG00000027379.13	Bub1	704.375	619.835	784.444	1156.56	1059.27	1205.19
1134.284141715994	-0.559141	0.0831105	6.72768	1.72388e-11	6.52093e-10	ENSMUSG00000022982.10	Sod1	1334.56	1381.06	1337.32	923.885	929.559	899.322
2100.1418831630876	0.497848	0.074116	-6.71715	1.85319e-11	6.98958e-10	ENSMUSG00000050812.18	Ecpas	1719.61	1685.23	1819.76	2445.31	2459.01	2471.93
119.74333353507546	-1.47311	0.219403	6.7142	1.89106e-11	7.09094e-10	ENSMUSG00000038903.13	Ccdc68	208.495	153.726	164.994	51.3689	64.853	75.0237
164.58726983779172	3.81223	0.567757	-6.71454	1.88654e-11	7.09094e-10	ENSMUSG00000029561.17	Oasl2	15.0267	13.153	37.6302	349.006	390.919	181.788
3527.505312489617	-0.468819	0.0699062	6.7064	1.99485e-11	7.45842e-10	ENSMUSG00000017707.9	Serinc3	4040.3	4244.31	4001.34	2875.15	2947.21	3056.73
2133.681467240726	0.492243	0.0734976	-6.69741	2.12149e-11	7.90898e-10	ENSMUSG00000035181.6	Heatr5a	1798.5	1706.6	1816.86	2527.65	2453.6	2498.87
2721.7381062612544	0.551501	0.0823954	-6.69335	2.18112e-11	8.10786e-10	ENSMUSG00000025403.5	Shmt2	2217.37	2083.1	2317.63	3193.94	3516.47	3001.91
2128.9976513717857	0.498644	0.0746249	-6.68201	2.35691e-11	8.73613e-10	ENSMUSG00000041645.14	Ddx24	1727.13	1791.27	1772.48	2511.79	2586.91	2384.41
176.54946351935314	1.21307	0.181777	-6.67342	2.49902e-11	9.23634e-10	ENSMUSG00000022231.10	Sema5a	102.369	95.3592	120.61	259.866	281.03	200.063
5292.02005403051	0.442067	0.0662634	-6.67137	2.53432e-11	9.34007e-10	ENSMUSG00000003660.10	Snrnp200	4419.72	4587.11	4459.66	6319.13	5908.83	6057.68
674.9155063306107	0.677771	0.101645	-6.668	2.59308e-11	9.51433e-10	ENSMUSG00000028678.13	Kif2c	521.238	499.814	538.401	891.402	821.471	777.169
3706.044741716461	0.577247	0.0865775	-6.6674	2.6037e-11	9.51433e-10	ENSMUSG00000000693.10	Loxl3	3026.94	2638	3256.46	4430.57	4682.02	4202.29
605.6070960532595	0.766929	0.115027	-6.6674	2.60373e-11	9.51433e-10	ENSMUSG00000029093.14	Sorcs2	501.515	425.828	418.756	712.366	727.794	847.383
166.59996196069008	1.52361	0.228795	-6.65931	2.75122e-11	1.00004e-09	ENSMUSG00000061232.16	H2-K1	81.7075	76.4518	98.4174	266.665	322.463	153.895
1839.916263436843	0.543626	0.0816348	-6.65925	2.75226e-11	1.00004e-09	ENSMUSG00000002870.8	Mcm2	1597.52	1490.4	1405.82	2281.38	2147.35	2117.01
969.0825364804168	0.688354	0.103463	-6.65313	2.86916e-11	1.03959e-09	ENSMUSG00000027699.19	Ect2	761.664	637.098	829.793	1188.28	1179.96	1217.69
401.4198840099686	-0.84741	0.127519	6.64539	3.02424e-11	1.09271e-09	ENSMUSG00000073599.10	Ecscr	504.333	475.974	566.382	258.355	291.838	311.637
3713.718524737085	-0.470557	0.0708385	6.64268	3.0803e-11	1.10986e-09	ENSMUSG00000031555.15	Adam9	4258.18	4526.27	4153.79	3020.19	3165.18	3158.69
2373.7611704139763	0.526477	0.0794798	-6.62403	3.49538e-11	1.2559e-09	ENSMUSG00000002748.7	Baz1b	1936.56	1880.06	2026.24	3002.81	2622.94	2773.95
2799.3987731105985	-0.502148	0.0758504	6.62024	3.58607e-11	1.28491e-09	ENSMUSG00000008348.9	Ubc	3315.26	3368.81	3169.62	2440.78	2161.77	2340.16
42.15558387956157	2.5847	0.39162	-6.60002	4.111e-11	1.46891e-09	ENSMUSG00000022548.14	Apod	11.27	9.04268	16.4029	101.227	63.0515	51.9395
244.36254074760313	-1.31537	0.199332	6.59888	4.14281e-11	1.47619e-09	ENSMUSG00000022321.15	Cdh10	347.492	367.462	332.882	102.738	111.691	203.911
970.2506763751194	0.648844	0.098354	-6.59703	4.19483e-11	1.49061e-09	ENSMUSG00000023015.14	Racgap1	759.786	671.625	837.512	1205.66	1176.36	1170.56
3107.713235229323	-0.533458	0.0809857	6.58707	4.48605e-11	1.58971e-09	ENSMUSG00000020099.8	Unc5b	3708.77	3968.09	3345.23	2492.9	2639.16	2492.13
2765.598743817692	-0.45245	0.0687677	6.57939	4.72377e-11	1.66937e-09	ENSMUSG00000021765.9	Fst	3175.32	3176.45	3234.26	2337.29	2359.93	2310.34
1015.3512116868421	1.51118	0.229906	-6.57302	4.93053e-11	1.73768e-09	ENSMUSG00000036334.12	Igsf10	526.873	405.277	651.291	1763.92	1408.75	1336
632.9319838311757	-0.683552	0.104002	6.57249	4.94809e-11	1.73911e-09	ENSMUSG00000028385.14	Snx30	755.09	810.553	774.795	456.277	473.787	527.09
3926.346033611283	0.565839	0.0861587	-6.5674	5.11997e-11	1.79463e-09	ENSMUSG00000036777.8	Anln	3080.47	2868.17	3554.6	4907.24	4487.46	4660.13
1245.132641687554	0.7197	0.109633	-6.56464	5.21595e-11	1.82332e-09	ENSMUSG00000069265.2	H3c1	909.114	799.044	1116.36	1606.03	1547.46	1492.78
631.8726852264418	-0.820826	0.125073	6.56278	5.28137e-11	1.8412e-09	ENSMUSG00000063632.6	Sox11	785.144	958.524	676.378	458.543	455.772	456.875
569.6408834742896	-0.699324	0.106622	6.5589	5.4207e-11	1.87966e-09	ENSMUSG00000042284.10	Itga1	658.356	748.076	705.324	425.304	457.574	423.211
1666.3628966277458	0.794986	0.121207	-6.55889	5.42082e-11	1.87966e-09	ENSMUSG00000022146.12	Osmr	1298.87	947.015	1412.58	2315.38	2084.3	1940.04
14003.435037646796	-0.63154	0.0963704	6.55325	5.62983e-11	1.94169e-09	ENSMUSG00000026879.14	Gsn	16686.2	19872.5	14504	10870.6	10540.4	11546.9
256.6236158907828	1.06904	0.163127	-6.55344	5.62273e-11	1.94169e-09	ENSMUSG00000036905.8	C1qb	155.902	145.505	192.975	318.789	419.743	306.828
352.0386011296554	-0.990948	0.151521	6.53999	6.15219e-11	2.11619e-09	ENSMUSG00000053192.9	Mllt11	435.773	551.604	420.686	220.584	201.765	281.82
5513.2035281321605	-0.476807	0.072932	6.53769	6.24756e-11	2.14328e-09	ENSMUSG00000033149.17	Phldb2	6279.27	6860.93	6112.49	4649.64	4410	4766.89
651.1744556118166	-0.687437	0.105168	6.53656	6.29481e-11	2.15376e-09	ENSMUSG00000025868.6	Higd2a	784.204	868.919	755.498	516.711	515.221	466.493
319.8887190073803	0.912344	0.139686	-6.5314	6.51568e-11	2.22343e-09	ENSMUSG00000019256.17	Ahr	209.434	194.829	261.481	417.75	439.559	396.279
512.2938050499909	-0.830613	0.127195	6.53024	6.56657e-11	2.23489e-09	ENSMUSG00000064181.6	Rab3ip	613.276	711.906	643.572	327.854	340.478	436.676
116.86913812013401	-1.4571	0.223341	6.5241	6.8409e-11	2.32212e-09	ENSMUSG00000039470.15	Zdhhc2	143.693	217.846	152.45	63.4557	61.25	62.5197
6348.147670454927	-0.449554	0.0690756	6.50815	7.60796e-11	2.57572e-09	ENSMUSG00000026421.14	Csrp1	7589.41	7381.29	7020.44	5265.31	5200.85	5631.59
299.343071669182	-0.972691	0.149557	6.50383	7.8301e-11	2.64399e-09	ENSMUSG00000038375.15	Trp53inp2	388.815	449.668	345.426	185.835	237.794	188.521
1298.9031951906163	0.595364	0.0916467	-6.49629	8.23242e-11	2.77258e-09	ENSMUSG00000052798.13	Nup107	1000.21	953.592	1153.03	1595.46	1520.44	1570.69
2363.3688202168923	0.550941	0.0848482	-6.49326	8.39988e-11	2.82162e-09	ENSMUSG00000030342.8	Cd9	1965.68	1861.15	1931.68	3120.66	2646.36	2654.68
294.2422198261721	-0.916649	0.141192	6.49222	8.45822e-11	2.83383e-09	ENSMUSG00000031189.12	Aff2	370.971	399.522	389.81	228.894	167.537	208.72
916.78358216447225	0.594886	0.0917266	-6.48543	8.84815e-11	2.9568e-09	ENSMUSG00000020739.11	Nup85	703.436	725.059	760.322	1111.99	1160.15	1039.75
1438.3750541879194	0.659852	0.101877	-6.47697	9.35797e-11	3.11908e-09	ENSMUSG00000028967.10	Errfi1	1157.99	940.439	1247.58	1794.13	1806.88	1683.22
3428.449566573214	-1.63548	0.252707	6.47185	9.6811e-11	3.21847e-09	ENSMUSG00000024803.9	Ankrd1	5101.55	5851.44	4609.21	1292.53	1525.85	2190.11
2344.6624821342375	0.517469	0.0800783	-6.46203	1.03305e-10	3.42554e-09	ENSMUSG00000024590.8	Lmnb1	1950.65	1880.88	1959.66	3002.06	2637.35	2637.37
1999.930275692335	0.479838	0.0743544	-6.4534	1.09369e-10	3.61732e-09	ENSMUSG00000028034.15	Fubp1	1658.57	1653.17	1703.01	2347.86	2241.03	2395.95
547.4064502201601	-0.686582	0.106484	6.44777	1.13509e-10	3.73509e-09	ENSMUSG00000031586.17	Rbpms	692.166	688.888	641.643	395.843	435.956	429.943
3772.906388656104	-0.473412	0.0734189	6.44809	1.13267e-10	3.73509e-09	ENSMUSG00000031591.14	Asah1	4368.07	4472.84	4321.68	3045.87	3033.68	3395.3
752.6574230092483	0.622918	0.0967092	-6.44115	1.18573e-10	3.89178e-09	ENSMUSG00000027203.15	Dut	595.432	553.248	631.029	935.216	900.736	900.284
361.3820632951046	-0.826648	0.128432	6.43646	1.22293e-10	4.0037e-09	ENSMUSG00000056091.12	St3gal5	435.773	493.237	452.527	254.578	293.64	238.537
5729.26573159969	-0.515328	0.0801715	6.42783	1.29441e-10	4.21941e-09	ENSMUSG00000028273.15	Pdlim5	6607.98	7142.9	6479.14	4528.77	4419.01	5197.8
355.678746708715	1.02734	0.15983	-6.42772	1.29536e-10	4.21941e-09	ENSMUSG00000021676.10	Iqgap2	223.522	197.295	280.779	515.955	540.441	376.08
2217.044550393697	0.552383	0.0859724	-6.42512	1.31767e-10	4.28126e-09	ENSMUSG00000019961.17	Tmpo	1787.23	1659.74	1950.01	2824.53	2576.1	2504.64
1509.0783247297643	0.552559	0.0860057	-6.42468	1.32146e-10	4.28279e-09	ENSMUSG00000051329.13	Nup160	1180.53	1156.64	1336.35	1860.61	1758.24	1762.09
319.5864278062821	0.824857	0.128549	-6.41668	1.39275e-10	4.50253e-09	ENSMUSG00000041406.14	BC055324	225.4	217.024	249.903	419.261	412.537	393.393
10520.747877542886	-0.468203	0.0730116	6.41271	1.42955e-10	4.60775e-09	ENSMUSG00000033306.15	Lpp	12037.3	12886.6	11721.3	8715.34	8313.79	9450.1
467.26273330717186	0.815368	0.127155	-6.4124	1.43244e-10	4.60775e-09	ENSMUSG00000001151.10	Pcnt	372.849	312.384	329.988	643.622	635.919	508.815
419.10451290954524	-0.892691	0.139298	6.40852	1.46943e-10	4.71498e-09	ENSMUSG00000048482.14	Bdnf	532.508	580.376	522.963	252.312	264.816	361.653
4369.3543812931675	0.565321	0.0882405	-6.40659	1.48812e-10	4.75129e-09	ENSMUSG00000028820.13	Sfpq	3568.83	3868.62	3134.88	5606.76	5172.02	4865
1053.4034634049838	0.820365	0.128049	-6.40664	1.48759e-10	4.75129e-09	ENSMUSG00000063021.3	H2ac15	842.433	627.233	821.11	1603.01	1178.16	1248.47
198.9765804718208	2.60165	0.406114	-6.40619	1.49197e-10	4.75184e-09	ENSMUSG00000031070.15	Mrgprf	73.255	30.4163	65.6116	410.951	354.89	258.736
127.95602691217151	1.28994	0.201452	-6.4032	1.52159e-10	4.83422e-09	ENSMUSG00000005360.14	Slc1a3	72.3159	82.2062	69.4711	216.052	160.331	167.361
499.26941341117316	-0.892797	0.139508	6.39959	1.55798e-10	4.93769e-09	ENSMUSG00000032232.14	Cgnl1	651.782	757.941	538.401	321.056	322.463	403.974
267.94610640345445	-0.923421	0.144315	6.39865	1.56759e-10	4.95597e-09	ENSMUSG00000003948.17	Mmd	351.248	360.063	340.601	163.172	181.949	210.643
393.61558149438895	0.918826	0.143669	-6.39545	1.60077e-10	5.04071e-09	ENSMUSG00000038379.15	Ttk	271.419	216.202	329.988	527.287	536.838	479.959
1518.6122134265893	0.705724	0.11035	-6.39531	1.60221e-10	5.04071e-09	ENSMUSG00000038943.16	Prc1	1097.89	992.229	1377.84	2013.96	1747.43	1882.33
135.76755493514196	1.26215	0.197467	-6.3917	1.64054e-10	5.14874e-09	ENSMUSG00000001819.4	Hoxd13	77.9509	96.1812	65.6116	186.59	174.743	213.529
4055.624504869157	1.51107	0.236511	-6.389	1.66972e-10	5.2276e-09	ENSMUSG00000020241.13	Col6a2	2117.82	1612.06	2590.69	6779.94	6339.38	4893.85
1811.7424733144921	0.527536	0.0826653	-6.38159	1.7526e-10	5.47379e-09	ENSMUSG00000049553.11	Polr1a	1508.3	1451.76	1498.45	2320.67	2005.04	2086.24
2231.6189372800563	0.500071	0.0784342	-6.37568	1.82159e-10	5.66184e-09	ENSMUSG00000021048.7	Mthfd1	1902.75	1919.51	1726.16	2622.08	2505.85	2713.36
1707.1384140727146	-0.543036	0.0851694	6.37595	1.81827e-10	5.66184e-09	ENSMUSG00000003363.15	Pld3	1994.79	2185.04	1891.16	1325.02	1406.95	1439.88
1335.154974640436	0.534559	0.0838595	-6.37446	1.83608e-10	5.69316e-09	ENSMUSG00000048170.14	Mcmbp	1133.57	1012.78	1126.01	1571.28	1588.9	1578.38
293.01444103891964	0.905242	0.142155	-6.36798	1.91535e-10	5.92473e-09	ENSMUSG00000034023.16	Fancd2	204.738	184.142	221.921	392.821	419.743	334.721
23098.9403271485	-0.587387	0.0923177	6.36267	1.98277e-10	6.11859e-09	ENSMUSG00000025278.9	Flnb	25241.1	32496.9	25476.6	19466.5	17818.4	18094.2
2575.5411974120325	-0.601226	0.0945674	6.35764	2.04872e-10	6.30704e-09	ENSMUSG00000029552.19	Tes	3037.27	3257.83	3021.03	1852.3	1916.77	2368.06
185.40834276108146	-1.18184	0.185967	6.35512	2.08259e-10	6.38085e-09	ENSMUSG00000014846.12	Tppp3	232.913	244.152	293.322	88.3847	117.096	136.582
850.440412624576	-0.615558	0.0968581	6.35526	2.08072e-10	6.38085e-09	ENSMUSG00000024593.15	Megf10	1081.92	1057.99	949.438	659.486	644.927	708.878
32.56319876006216	2.62789	0.41355	-6.35447	2.0915e-10	6.39297e-09	ENSMUSG00000102697.1	Pcdhac2	10.3308	6.5765	10.6136	65.722	54.0441	48.0921
536.7408571121166	0.823887	0.129729	-6.35085	2.14123e-10	6.52947e-09	ENSMUSG00000069272.6	H2ac8	402.903	310.739	451.562	723.697	661.14	670.404
99.24907212590439	-1.40159	0.220886	6.3453	2.21996e-10	6.75361e-09	ENSMUSG00000049107.13	Ntf3	135.24	160.302	137.977	60.434	48.6397	52.9013
962.8288442046323	-0.668428	0.105349	6.3449	2.22572e-10	6.75519e-09	ENSMUSG00000063727.3	Tnfrsf11b	1207.77	1199.39	1143.38	694.236	666.544	865.658
224.27734596539813	-1.03487	0.16323	6.33992	2.2988e-10	6.96063e-09	ENSMUSG00000045377.5	Tmem88	299.594	351.842	253.762	148.819	138.713	152.933
195.1480286783302	1.21432	0.191664	-6.33571	2.36258e-10	7.13699e-09	ENSMUSG00000054150.12	Syne3	107.065	98.6474	146.661	300.659	306.25	211.605
532.2693667649105	0.713822	0.112764	-6.3302	2.44843e-10	7.37905e-09	ENSMUSG00000020572.8	Nampt	416.99	385.547	412.002	701.79	581.875	695.412
927.2437517868196	0.644357	0.101927	-6.32176	2.58606e-10	7.77567e-09	ENSMUSG00000057406.16	Nsd2	708.132	660.938	806.636	1178.46	1035.85	1173.45
289.0773584170097	0.861136	0.136366	-6.31489	2.70355e-10	8.11001e-09	ENSMUSG00000019773.7	Fbxo5	227.278	184.142	204.554	361.093	376.507	380.89
6000.395072366888	1.26706	0.200692	-6.31344	2.72902e-10	8.16743e-09	ENSMUSG00000001119.7	Col6a1	3562.26	2896.12	4110.37	9756.31	8744.34	6932.96
433.5706900461369	0.803216	0.127274	-6.31092	2.77373e-10	8.28203e-09	ENSMUSG00000024989.15	Cep55	326.83	267.992	356.039	576.389	513.419	560.754
8160.704709570845	0.405707	0.0643242	-6.30722	2.84086e-10	8.46286e-09	ENSMUSG00000020850.14	Prpf8	7021.21	7184	6861.23	9584.83	8996.55	9316.4
686.012233644619	0.696089	0.110462	-6.30161	2.94566e-10	8.75485e-09	ENSMUSG00000030036.8	Mogs	524.994	571.333	473.754	914.82	866.508	764.665
9321.581741011018	0.465617	0.0738943	-6.30112	2.95506e-10	8.76261e-09	ENSMUSG00000002020.15	Ltbp2	8354.83	7702.72	7428.58	10869.1	11410.5	10163.8
274.6619535910452	-0.971286	0.154165	6.30032	2.97033e-10	8.78767e-09	ENSMUSG00000028005.13	Gucy1b1	328.708	393.768	369.548	161.661	171.14	223.147
246.00610551367663	0.998441	0.158881	-6.28421	3.29524e-10	9.72661e-09	ENSMUSG00000026825.17	Dnm1	168.111	137.284	187.186	352.028	347.684	283.743
606.9563358346654	-0.709679	0.112988	6.28103	3.36339e-10	9.90511e-09	ENSMUSG00000026883.17	Dab2ip	741.003	832.749	683.132	474.407	488.199	422.249
891.6397385736968	-0.643176	0.10255	6.27184	3.56812e-10	1.04841e-08	ENSMUSG00000019302.16	Atp6v0a1	1088.49	1209.25	961.981	687.437	704.375	698.297
5124.554932083905	-0.55701	0.0888381	6.26994	3.61191e-10	1.05886e-08	ENSMUSG00000002265.17	Peg3	5913	6966.97	5425.5	4268.91	4094.74	4078.21
64.37644277010575	-1.72005	0.274477	6.26665	3.68907e-10	1.07903e-08	ENSMUSG00000046856.13	Gpr1	88.2817	106.046	103.242	31.7279	25.2206	31.7408
155.86030515565966	-1.13198	0.180726	6.26353	3.76351e-10	1.09832e-08	ENSMUSG00000015980.14	Lrrc27	226.339	231.821	185.256	99.7161	90.0736	101.955
305.146258601098	0.817789	0.130678	-6.25803	3.89873e-10	1.13521e-08	ENSMUSG00000020069.16	Hnrnph3	219.765	207.16	237.36	390.555	371.103	404.936
919.1576026559742	0.669555	0.107054	-6.25436	3.99153e-10	1.15961e-08	ENSMUSG00000032254.10	Kif23	779.509	660.938	694.711	1254.01	990.809	1134.97
56.88627065749182	2.05825	0.329166	-6.25292	4.02843e-10	1.1677e-08	ENSMUSG00000024338.15	Psmb8	12.2092	20.5515	32.8058	81.5859	115.294	78.8711
14272.698229947722	0.477662	0.07641	-6.25129	4.07065e-10	1.17729e-08	ENSMUSG00000026234.12	Ncl	11765.9	11256.5	12779.8	17053.7	15287.3	17493
590.1202651395869	0.819982	0.131178	-6.25089	4.0811e-10	1.17768e-08	ENSMUSG00000024308.15	Tapbp	432.956	466.931	376.302	778.843	870.111	615.579
2695.7314517741033	-0.578226	0.0925479	6.24785	4.16137e-10	1.19816e-08	ENSMUSG00000022098.10	Bmp1	3174.38	3660.64	2850.24	2091.77	2143.75	2253.6
193.26531306515093	1.04902	0.168098	-6.24055	4.36024e-10	1.24984e-08	ENSMUSG00000039994.15	Timeless	116.457	146.327	113.855	276.486	275.625	230.842
2789.4801128327726	0.501853	0.0804148	-6.24081	4.35301e-10	1.24984e-08	ENSMUSG00000029201.14	Ugdh	2386.42	2263.96	2280	3555.79	3222.83	3027.88
388.6607549523973	-0.819912	0.131452	6.23736	4.45016e-10	1.27278e-08	ENSMUSG00000023960.13	Enpp5	463.009	542.561	482.438	250.801	273.824	319.332
1341.3240000916808	0.502847	0.0806447	-6.23534	4.50789e-10	1.28644e-08	ENSMUSG00000037364.12	Srrt	1111.97	1139.38	1080.66	1614.34	1522.24	1579.34
154.48213468449737	-1.14886	0.184767	6.21791	5.03814e-10	1.43256e-08	ENSMUSG00000051811.14	Cox6b2	181.259	217.846	238.324	97.4498	104.485	87.5276
704.3327616893097	0.663502	0.106716	-6.21744	5.05323e-10	1.43256e-08	ENSMUSG00000029328.15	Hnrnpdl	552.23	479.262	605.942	885.358	853.897	849.307
203.07860813481372	0.972609	0.156425	-6.21772	5.0442e-10	1.43256e-08	ENSMUSG00000055612.15	Cdca7	141.814	124.131	144.731	270.442	288.235	249.117
3662.6933365051045	-0.543007	0.0873582	6.21587	5.10425e-10	1.44385e-08	ENSMUSG00000026701.15	Prdx6	4096.65	4555.04	4383.43	2776.19	2801.29	3363.56
418.9597293104256	0.815259	0.131238	-6.21206	5.22936e-10	1.47601e-08	ENSMUSG00000029516.19	Cit	302.412	274.569	335.777	602.829	527.831	470.341
202.9605631252963	-1.06238	0.17106	6.2106	5.27825e-10	1.48655e-08	ENSMUSG00000050315.14	Synpo2	232.913	304.163	286.568	117.846	124.302	151.971
452.8683096408185	-0.726964	0.117121	6.20696	5.40209e-10	1.51812e-08	ENSMUSG00000020451.17	Limk2	532.508	560.646	595.329	319.545	378.309	330.874
25399.787754065495	0.454655	0.0732974	-6.20288	5.54403e-10	1.55462e-08	ENSMUSG00000027204.13	Fbn1	21747.4	20163.5	22380.3	30914.3	30053.9	27139.3
778.3251172525263	-0.631636	0.101837	6.2024	5.56091e-10	1.55597e-08	ENSMUSG00000019998.6	Stx7	967.342	900.98	976.455	612.65	544.044	668.48
648.5986958050145	-0.642806	0.103677	6.20009	5.64321e-10	1.57558e-08	ENSMUSG00000027133.3	Nop10	822.71	829.46	719.798	498.581	502.61	518.433
4218.048070039489	0.508103	0.0820851	-6.18995	6.01833e-10	1.67668e-08	ENSMUSG00000002718.14	Cse1l	3473.98	3169.87	3810.3	5003.18	4682.02	5168.94
350.33805956756805	-1.14844	0.185563	6.18895	6.05649e-10	1.68368e-08	ENSMUSG00000023043.7	Krt18	520.299	549.137	378.231	158.639	207.169	288.553
1992.7394557076507	-0.521144	0.0842168	6.18813	6.08823e-10	1.68886e-08	ENSMUSG00000027806.9	Tsc22d2	2263.39	2543.46	2245.27	1680.82	1525.85	1697.65
1140.9647250947694	0.594194	0.0960293	-6.18763	6.10744e-10	1.69055e-08	ENSMUSG00000050069.3	Grem2	840.554	878.784	1007.33	1409.62	1432.17	1277.33
6622.012086904978	0.501859	0.0811376	-6.18528	6.19939e-10	1.71233e-08	ENSMUSG00000030978.10	Rrm1	5402.09	4966.9	6080.65	8048.3	7535.55	7698.59
60.82136322253351	1.97697	0.31983	-6.18132	6.35658e-10	1.752e-08	ENSMUSG00000032596.14	Uba7	19.7225	27.128	26.0517	98.9607	131.507	61.5579
1081.1329729648908	0.556963	0.0901346	-6.17924	6.44109e-10	1.77151e-08	ENSMUSG00000028614.14	Ndc1	847.129	830.283	948.473	1321.99	1295.26	1243.66
901.0837768076826	0.5973	0.0966735	-6.17854	6.46985e-10	1.77563e-08	ENSMUSG00000024251.10	Thada	651.782	710.261	790.233	1087.06	1075.48	1091.69
723.325687749694	0.646527	0.104691	-6.17557	6.5927e-10	1.80551e-08	ENSMUSG00000096010.2	H4f16	595.432	528.586	572.171	972.987	821.471	849.307
540.7069065140887	0.735994	0.119446	-6.16174	7.19493e-10	1.96626e-08	ENSMUSG00000030748.9	Il4ra	447.983	354.309	412.967	673.839	738.603	616.541
4898.827714503747	0.497789	0.0808779	-6.15482	7.5163e-10	2.04974e-08	ENSMUSG00000013629.16	Cad	4042.17	4400.5	3740.82	5995.81	5876.4	5337.26
318.86278919851304	-0.925659	0.15045	6.15261	7.62202e-10	2.07419e-08	ENSMUSG00000019850.11	Tnfaip3	397.268	484.194	376.302	221.34	180.147	253.926
1991.3800982650118	0.505997	0.0822526	-6.15175	7.66332e-10	2.08103e-08	ENSMUSG00000038299.16	Wdr36	1625.7	1559.45	1750.29	2188.47	2385.15	2439.23
677.8659430026222	0.644241	0.10478	-6.14851	7.8216e-10	2.11955e-08	ENSMUSG00000046324.12	Ermp1	497.758	524.475	566.382	790.93	785.441	902.208
1842.9090673088974	0.608527	0.098987	-6.14754	7.86932e-10	2.12802e-08	ENSMUSG00000028312.19	Smc2	1450.07	1256.93	1675.99	2218.68	2147.35	2308.42
599.3731454871115	0.784359	0.127597	-6.14718	7.8874e-10	2.12844e-08	ENSMUSG00000030772.6	Dkk3	484.61	415.141	419.721	827.946	832.28	616.541
281.44540038913726	0.828273	0.13476	-6.14627	7.93251e-10	2.13615e-08	ENSMUSG00000025925.14	Terf1	211.313	184.142	213.238	357.316	363.897	358.767
323.1185847968902	1.0386	0.169413	-6.13055	8.75747e-10	2.35339e-08	ENSMUSG00000038112.15	AW551984	221.643	161.946	251.833	494.048	462.978	346.263
2315.9231708892926	0.504295	0.0823553	-6.1234	9.15966e-10	2.45259e-08	ENSMUSG00000019432.15	Ddx39b	1964.74	1750.99	2030.1	2789.78	2785.07	2574.85
6388.555249773201	0.395346	0.0645641	-6.12332	9.16463e-10	2.45259e-08	ENSMUSG00000025982.13	Sf3b1	5527	5403.41	5629.09	7233.19	7068.97	7469.67
2031.008128220146	-0.685574	0.112038	6.11912	9.40942e-10	2.51288e-08	ENSMUSG00000028494.12	Plin2	2381.73	2933.94	2202.81	1501.03	1387.13	1779.41
3099.3816635967705	0.504607	0.0825062	-6.11598	9.59637e-10	2.55751e-08	ENSMUSG00000026020.9	Nop58	2512.27	2396.31	2786.56	3737.09	3370.55	3793.51
3949.081479881241	0.423208	0.0692272	-6.11331	9.75835e-10	2.59532e-08	ENSMUSG00000059208.15	Hnrnpm	3480.55	3398.4	3243.91	4664.75	4505.48	4401.39
402.5444999527826	0.761477	0.124701	-6.10644	1.01878e-09	2.70395e-08	ENSMUSG00000058392.13	Rrp1b	327.769	259.772	309.725	491.782	497.206	529.013
666.4299266481873	-0.662506	0.108619	6.09937	1.06485e-09	2.82043e-08	ENSMUSG00000000058.6	Cav2	805.805	753.009	889.616	534.086	547.647	468.417
684.4348917756706	0.800738	0.131332	-6.09704	1.08049e-09	2.85599e-08	ENSMUSG00000027326.13	Knl1	494.941	393.768	611.731	896.69	832.28	877.2
2787.5444734801904	-0.496173	0.0814736	6.08998	1.12924e-09	2.97874e-08	ENSMUSG00000031246.14	Sh3bgrl	3233.55	3233.99	3324	2204.33	2168.97	2560.42
948.9977012379157	0.636216	0.104509	-6.08769	1.14554e-09	3.01559e-08	ENSMUSG00000022021.14	Diaph3	729.733	667.514	836.548	1250.23	1082.68	1127.28
175.17437483635936	-1.06459	0.174974	6.08427	1.17021e-09	3.07425e-08	ENSMUSG00000028789.16	Azin2	234.792	267.992	208.413	105.76	108.088	126.001
738.0271550722108	-0.803033	0.132035	6.08199	1.18699e-09	3.11199e-08	ENSMUSG00000022558.16	Mroh1	968.281	1102.38	742.955	492.537	531.434	590.571
3551.965644819925	0.511292	0.0841114	-6.07874	1.21129e-09	3.16926e-08	ENSMUSG00000022797.16	Tfrc	3025.06	2698.83	3070.24	4183.54	3817.32	4516.81
563.9568953831214	-0.621969	0.102384	6.07487	1.2409e-09	3.24016e-08	ENSMUSG00000041870.16	Ankrd13a	676.2	697.931	677.343	456.277	443.162	432.829
2187.866941719741	0.508814	0.0837975	-6.07194	1.26371e-09	3.29306e-08	ENSMUSG00000027405.16	Nop56	1880.21	1630.15	1908.52	2477.04	2568.9	2662.38
225.42490242294258	-1.0967	0.180746	6.06763	1.29809e-09	3.37581e-08	ENSMUSG00000015619.10	Gata3	297.716	378.148	249.903	159.395	113.493	153.895
988.8181376063397	-0.722821	0.119228	6.06253	1.33997e-09	3.47771e-08	ENSMUSG00000042613.9	Pbxip1	1192.74	1456.69	1041.1	768.267	799.853	674.251
780.6161831712539	0.706995	0.116659	-6.06037	1.35805e-09	3.51757e-08	ENSMUSG00000056501.3	Cebpb	619.85	591.062	566.382	1059.86	1052.06	794.482
57.432042950107885	1.93912	0.320221	-6.05558	1.39916e-09	3.61679e-08	ENSMUSG00000035929.11	H2-Q4	29.1142	23.0177	18.3326	93.6727	118.897	61.5579
1629.2084604276265	-0.512814	0.0848219	6.04578	1.4869e-09	3.83591e-08	ENSMUSG00000026078.10	Pdcl3	1928.11	2034.6	1789.85	1402.82	1264.63	1355.24
1354.8195733532236	0.499151	0.0825991	-6.04305	1.51226e-09	3.89353e-08	ENSMUSG00000022814.6	Umps	1163.63	1090.05	1114.43	1638.52	1614.12	1508.17
1132.10534330822	0.517405	0.0857059	-6.03698	1.57028e-09	4.03487e-08	ENSMUSG00000079487.11	Med12	889.391	968.389	934.965	1365.81	1352.9	1281.17
399.3555733064369	0.813886	0.134891	-6.03365	1.60297e-09	4.11069e-08	ENSMUSG00000020897.12	Aurkb	286.446	242.508	342.531	534.841	480.993	508.815
1873.8270788136301	0.57131	0.0947087	-6.03229	1.61654e-09	4.13725e-08	ENSMUSG00000006369.14	Fbln1	1515.82	1393.39	1612.31	2381.1	2374.34	1966.01
3123.93481101004	-0.497101	0.0824445	6.02952	1.64444e-09	4.20033e-08	ENSMUSG00000030894.5	Tpp1	3663.69	3985.36	3324.96	2634.17	2478.82	2656.61
66.09006936221512	-1.80609	0.299592	6.02849	1.65494e-09	4.21879e-08	ENSMUSG00000061086.12	Myl4	84.525	101.936	117.715	20.3965	45.0368	26.9316
201.1761151761145	1.06067	0.175984	-6.02709	1.66942e-09	4.24304e-08	ENSMUSG00000074476.6	Spc24	136.179	120.843	133.153	299.148	308.052	209.682
279.038099087606	-0.833434	0.138285	6.02693	1.67103e-09	4.24304e-08	ENSMUSG00000028557.10	Rnf11	376.606	338.689	354.11	182.813	216.177	205.834
1542.702535931584	0.617832	0.102562	-6.024	1.70154e-09	4.31202e-08	ENSMUSG00000061048.8	Cdh3	1310.14	1035.8	1305.48	1927.09	1976.21	1701.5
1374.4888588800777	0.580019	0.0962899	-6.02367	1.70505e-09	4.31244e-08	ENSMUSG00000034021.15	Pds5b	1151.42	951.948	1205.13	1682.33	1612.32	1643.79
647.558017918906	0.674649	0.112024	-6.02235	1.71897e-09	4.33915e-08	ENSMUSG00000022895.16	Ets2	505.272	508.034	478.579	799.24	900.736	693.488
7111.922900640753	-0.420238	0.0698594	6.01548	1.79355e-09	4.51854e-08	ENSMUSG00000048376.6	F2r	8275	8339.82	7799.09	5726.12	6314.16	6217.35
190.98956918815355	-1.07037	0.177981	6.01397	1.81036e-09	4.552e-08	ENSMUSG00000024299.17	Adamts10	247.94	297.586	225.781	115.58	151.324	107.726
789.2448068166676	0.707159	0.117649	-6.01074	1.8468e-09	4.63163e-08	ENSMUSG00000069273.2	H3c6	598.249	669.98	525.857	994.139	1098.9	848.345
990.5947138867888	0.554471	0.0922548	-6.01021	1.85279e-09	4.63163e-08	ENSMUSG00000039509.8	Nup133	802.049	835.215	767.076	1201.88	1246.62	1090.73
801.7493838797245	0.621313	0.103371	-6.0105	1.84951e-09	4.63163e-08	ENSMUSG00000027395.15	Polr1b	667.748	615.724	617.521	1073.46	866.508	969.537
332.0442906414745	0.748771	0.124604	-6.00921	1.86431e-09	4.65139e-08	ENSMUSG00000026622.15	Nek2	240.427	242.508	259.552	399.62	426.949	423.211
67.17619306446012	-1.71615	0.285632	6.00825	1.87533e-09	4.66985e-08	ENSMUSG00000020908.14	Myh3	104.248	125.775	80.0847	30.217	25.2206	37.5118
870.1748313638215	-0.585067	0.097478	6.00204	1.94851e-09	4.83601e-08	ENSMUSG00000027859.10	Ngf	1049.99	1095.81	986.103	649.666	686.361	753.122
641.2516725783145	-0.761118	0.126812	6.00196	1.94955e-09	4.83601e-08	ENSMUSG00000006717.7	Acot13	872.486	725.881	824.969	427.571	423.346	573.258
1221.766578497808	0.505357	0.084212	-6.00102	1.96087e-09	4.85475e-08	ENSMUSG00000035049.4	Rrp12	988.943	1047.31	995.752	1426.24	1370.92	1501.44
316.78169190429816	0.790933	0.131882	-5.99729	2.00639e-09	4.95793e-08	ENSMUSG00000038679.16	Trps1	214.13	251.551	231.57	432.103	383.713	387.622
1372.8010514067576	0.493147	0.0823263	-5.99015	2.09643e-09	5.17052e-08	ENSMUSG00000040688.16	Tbl3	1113.85	1185.41	1117.33	1560.71	1689.78	1569.73
181.31382748732452	-1.27913	0.213568	5.98936	2.10662e-09	5.18575e-08	ENSMUSG00000054215.2	Sprr2k	247.94	226.889	295.252	72.5208	99.0809	146.2
1349.976748342407	0.479291	0.080067	-5.98612	2.14909e-09	5.28022e-08	ENSMUSG00000037275.14	Gemin5	1156.11	1090.88	1135.66	1540.31	1588.9	1588
582.920988996171	-0.636617	0.106487	5.97837	2.25387e-09	5.52712e-08	ENSMUSG00000028211.11	Trp53inp1	740.064	688.888	702.43	441.924	426.949	497.272
1102.9007378612348	0.620448	0.103792	-5.9778	2.26174e-09	5.5359e-08	ENSMUSG00000027018.11	Hat1	871.547	760.407	980.314	1437.57	1270.04	1297.53
317.6333607033109	0.792046	0.132543	-5.97576	2.29015e-09	5.59482e-08	ENSMUSG00000027641.13	Rbl1	238.548	204.693	255.692	412.462	398.125	396.279
293.6853903625116	-0.850818	0.142675	5.96332	2.47168e-09	6.02688e-08	ENSMUSG00000061751.16	Kalrn	364.397	424.184	341.566	190.367	225.184	216.414
388.01798164554134	0.996003	0.167076	-5.96139	2.50101e-09	6.08689e-08	ENSMUSG00000042286.13	Stab1	256.393	216.202	301.041	462.32	673.75	418.401
401.6009581289619	-0.714598	0.119881	5.96088	2.50885e-09	6.09446e-08	ENSMUSG00000030161.8	Gabarapl1	496.819	508.856	496.911	324.077	268.419	314.522
141.97994751274678	-1.085	0.182043	5.96013	2.52044e-09	6.11111e-08	ENSMUSG00000020411.2	Nipal4	206.617	180.854	192.975	94.4281	84.6691	92.3369
14794.169334705324	1.16401	0.195353	-5.9585	2.54557e-09	6.16048e-08	ENSMUSG00000027750.16	Postn	9753.25	6765.57	10872.2	21212.3	20063	20098.7
325.9749487728939	0.836525	0.140402	-5.95809	2.552e-09	6.16447e-08	ENSMUSG00000028111.4	Ctsk	264.845	196.473	241.219	438.147	432.353	382.813
156964.15866971345	-0.433578	0.0727812	5.95728	2.56465e-09	6.16605e-08	ENSMUSG00000026193.15	Fn1	179694	193893	167542	133208	127285	140163
1365.8051187123851	-0.681253	0.114359	5.95713	2.567e-09	6.16605e-08	ENSMUSG00000018217.12	Pmp22	1636.97	2016.52	1391.35	1036.44	1071.88	1041.68
3005.9386878150067	0.471184	0.0790915	-5.95745	2.56201e-09	6.16605e-08	ENSMUSG00000022673.5	Mcm4	2512.27	2346.16	2705.51	3647.95	3325.52	3498.22
6278.605948311129	0.406326	0.0682726	-5.95152	2.65659e-09	6.3694e-08	ENSMUSG00000024073.16	Birc6	5274.36	5391.08	5542.25	7399.39	6755.52	7309.04
772.632357269295	0.601901	0.101143	-5.95097	2.66552e-09	6.37895e-08	ENSMUSG00000035704.17	Alg8	606.702	573.799	659.975	862.695	945.772	986.85
366.9787688415464	0.843356	0.141761	-5.94914	2.69553e-09	6.43882e-08	ENSMUSG00000030528.12	Blm	239.488	227.711	323.233	484.227	439.559	487.654
1201.5452214965649	0.660514	0.111065	-5.94709	2.72953e-09	6.50799e-08	ENSMUSG00000020330.16	Hmmr	968.281	762.051	1067.15	1526.71	1396.14	1488.93
527.8567316136727	0.655277	0.110199	-5.94631	2.74261e-09	6.52711e-08	ENSMUSG00000039298.16	Cdk5rap2	373.788	420.074	436.124	672.328	652.133	612.693
1559.7168018239229	-0.506653	0.0852235	5.945	2.76463e-09	6.56739e-08	ENSMUSG00000005417.17	Mprip	1841.71	1945	1701.08	1291.02	1349.3	1230.2
433.89024474352146	0.79252	0.133461	-5.9382	2.88163e-09	6.83276e-08	ENSMUSG00000021583.7	Erap1	287.385	292.654	373.407	597.541	565.662	486.692
181.26936572579993	0.941803	0.158718	-5.9338	2.96002e-09	7.00575e-08	ENSMUSG00000032783.9	Troap	127.727	122.487	122.539	237.203	232.39	245.27
14105.589472600064	1.3043	0.219915	-5.93091	3.01269e-09	7.11733e-08	ENSMUSG00000048126.16	Col6a3	8434.66	6055.31	9903.49	22175.5	20392.7	17671.9
203.70965687976405	0.975614	0.164864	-5.91768	3.26521e-09	7.68574e-08	ENSMUSG00000020974.6	Pole2	136.179	113.445	163.064	261.377	270.221	277.972
1094.1023176318374	-0.526403	0.0889542	5.91768	3.26508e-09	7.68574e-08	ENSMUSG00000047821.16	Trim16	1294.17	1372.02	1208.02	880.826	888.125	921.445
7049.844429116046	0.525665	0.0888397	-5.917	3.27872e-09	7.70351e-08	ENSMUSG00000024598.9	Fbn2	5629.37	5741.28	5968.72	9307.59	8477.72	7174.38
50.502222181834064	2.03735	0.344432	-5.91508	3.31713e-09	7.77958e-08	ENSMUSG00000068122.10	Agtr2	23.4792	16.4412	20.2624	115.58	66.6544	60.5961
7035.698282582319	-0.495105	0.0837578	5.91116	3.39717e-09	7.95283e-08	ENSMUSG00000017466.9	Timp2	7970.71	8926.77	7806.81	6291.94	5245.88	5972.08
1313.7691767156687	0.698435	0.118165	-5.9107	3.40656e-09	7.95355e-08	ENSMUSG00000021390.6	Ogn	1111.97	799.866	1095.13	1754.85	1664.56	1456.23
459.5173594987775	0.903039	0.152784	-5.91054	3.40981e-09	7.95355e-08	ENSMUSG00000071516.2	H2ac13	394.45	254.839	315.514	626.247	491.802	674.251
446.8949722831121	-0.714376	0.120974	5.90518	3.52259e-09	8.20179e-08	ENSMUSG00000024646.14	Cyb5a	526.873	592.707	546.12	367.892	347.684	300.095
253.74053578948326	-0.865058	0.146619	5.90003	3.63425e-09	8.44651e-08	ENSMUSG00000032368.14	Zic1	293.959	367.462	321.304	180.547	178.346	180.826
3361.6592911855537	-0.437405	0.0741558	5.89846	3.66919e-09	8.5124e-08	ENSMUSG00000032966.14	Fkbp1a	3993.34	3981.25	3631.79	2866.84	2740.04	2956.7
743.4659342265629	0.682588	0.115831	-5.89296	3.79329e-09	8.78449e-08	ENSMUSG00000001911.16	Nfix	640.512	501.458	573.136	1022.09	893.53	830.07
234.19753798330876	0.914006	0.15512	-5.89225	3.80966e-09	8.8066e-08	ENSMUSG00000051235.10	Gen1	161.537	142.217	186.221	321.811	270.221	323.179
4243.996209077837	0.505832	0.0858779	-5.89013	3.85885e-09	8.90434e-08	ENSMUSG00000020290.14	Xpo1	3454.26	3163.29	3910.64	5062.1	4687.43	5186.25
2614.0972547469532	-0.439474	0.0746256	5.88906	3.88404e-09	8.94648e-08	ENSMUSG00000029465.14	Arpc3	3049.48	2915.85	3070.24	2271.56	2082.5	2294.96
746.8377736676592	-0.567333	0.096368	5.88715	3.9292e-09	9.03436e-08	ENSMUSG00000030768.12	Disp1	886.574	945.371	843.302	599.807	598.088	607.884
156.9843107714234	1.06452	0.180865	-5.88572	3.96317e-09	9.09626e-08	ENSMUSG00000031596.15	Slc7a2	112.7	86.3165	105.171	216.807	232.39	188.521
29.895520915347564	2.89629	0.492373	-5.8823	4.0461e-09	9.25366e-08	ENSMUSG00000026574.5	Dpt	10.3308	0.822062	10.6136	64.9666	52.2427	40.3974
733.5698093558349	1.63853	0.27855	-5.88236	4.0445e-09	9.25366e-08	ENSMUSG00000000275.16	Trim25	380.363	250.729	439.019	1185.26	1259.23	886.819
1799.9987469086122	-0.487524	0.0829033	5.88063	4.08705e-09	9.33077e-08	ENSMUSG00000004085.14	Map3k20	2046.44	2123.39	2132.38	1388.47	1493.42	1615.89
69.50139752753215	-1.74891	0.298007	5.86868	4.39272e-09	1.00109e-07	ENSMUSG00000021301.9	Hecw1	90.16	127.42	102.277	19.6411	34.228	43.2829
754.9513172598056	-0.59638	0.101649	5.86708	4.43546e-09	1.00905e-07	ENSMUSG00000035093.16	Secisbp2l	903.479	955.236	868.388	563.547	578.272	660.786
2275.5885939271825	-0.53487	0.0912488	5.86166	4.58266e-09	1.03887e-07	ENSMUSG00000079037.9	Prnp	2508.51	3058.89	2506.75	1871.19	1923.97	1784.22
1734.231237249668	0.531283	0.090635	-5.86179	4.57915e-09	1.03887e-07	ENSMUSG00000061615.2	H2ac4	1454.77	1249.53	1552.49	2003.39	2046.47	2098.74
827.6620685023533	0.568849	0.0972326	-5.8504	4.90406e-09	1.10945e-07	ENSMUSG00000032253.13	Phip	665.869	626.411	712.079	1025.11	916.949	1019.55
953.5262725168216	0.594061	0.101546	-5.85015	4.91119e-09	1.10945e-07	ENSMUSG00000061607.15	Mdc1	766.36	722.592	796.023	1293.29	1064.67	1078.23
1570.0084551397113	0.537253	0.0919169	-5.84498	5.06623e-09	1.14247e-07	ENSMUSG00000024974.10	Smc3	1305.44	1155	1388.46	1910.47	1716.8	1943.88
148.86188697752826	1.11102	0.190243	-5.84	5.21997e-09	1.17509e-07	ENSMUSG00000025887.10	Casp12	105.187	76.4518	101.312	219.829	214.375	176.017
6374.8784491570295	-0.550166	0.0942299	5.83855	5.26584e-09	1.18335e-07	ENSMUSG00000023092.16	Fhl1	7649.51	8014.28	7062.89	4528.02	5036.91	5957.65
270.2871197748332	-0.864103	0.148092	5.83492	5.38177e-09	1.2073e-07	ENSMUSG00000010051.15	Hyal1	324.952	401.166	317.444	180.547	207.169	190.445
1419.3675636583166	0.488328	0.0837016	-5.83415	5.4067e-09	1.21078e-07	ENSMUSG00000006456.10	Rbm14	1212.46	1207.61	1119.26	1621.14	1760.04	1595.7
338.8829763398542	-0.848616	0.14561	5.82801	5.60922e-09	1.25396e-07	ENSMUSG00000023913.17	Pla2g7	457.374	443.913	409.107	217.562	207.169	298.171
151.40371270116339	1.07122	0.183862	-5.82619	5.67078e-09	1.26553e-07	ENSMUSG00000027330.16	Cdc25b	103.308	86.3165	104.207	231.16	203.566	179.864
4661.771957870748	-0.488443	0.0840115	5.814	6.09987e-09	1.35893e-07	ENSMUSG00000020184.15	Mdm2	5444.35	5520.15	5374.36	3771.84	3491.25	4368.69
705.2416119234459	0.645115	0.110997	-5.812	6.1732e-09	1.3729e-07	ENSMUSG00000026786.14	Apbb1ip	605.763	475.974	572.171	920.108	819.669	837.765
10371.986484497393	-0.532507	0.0916542	5.80996	6.24895e-09	1.38735e-07	ENSMUSG00000024501.20	Dpysl3	12587.7	12934.3	11273.6	7638.86	8059.78	9737.69
3377.159243234608	-0.459362	0.0790806	5.80879	6.29263e-09	1.39465e-07	ENSMUSG00000017760.16	Ctsa	3808.32	4285.41	3637.58	2872.13	2806.69	2852.82
47.96172366467138	-2.18549	0.376603	5.80317	6.50742e-09	1.43978e-07	ENSMUSG00000030672.12	Mylpf	77.9509	108.512	48.2438	12.0868	19.8162	21.1605
3974.378550258981	0.410765	0.070791	-5.8025	6.53342e-09	1.44306e-07	ENSMUSG00000027067.16	Ssrp1	3574.47	3264.41	3403.12	4657.95	4377.57	4568.75
3417.7057874733023	-0.445247	0.0767594	5.80056	6.60932e-09	1.45484e-07	ENSMUSG00000021242.9	Npc2	3942.62	4231.97	3650.13	2951.45	2830.11	2899.95
698.7025558847674	0.762823	0.131508	-5.80058	6.60867e-09	1.45484e-07	ENSMUSG00000099583.2	H3c4	500.576	414.319	641.643	920.108	870.111	845.459
1383.8557593612477	-0.557507	0.0961736	5.79689	6.7558e-09	1.48455e-07	ENSMUSG00000039168.15	Dap	1743.09	1469.02	1739.67	1178.46	1019.63	1153.25
880.2100811765235	-0.5995	0.103565	5.78863	7.09629e-09	1.55672e-07	ENSMUSG00000020225.10	Tmbim4	1092.25	1057.17	1029.52	614.161	706.177	781.978
646.8286777509518	0.607447	0.104952	-5.78785	7.1294e-09	1.55868e-07	ENSMUSG00000029415.4	Sdad1	540.96	461.177	537.436	763.735	762.022	815.642
15525.66854856577	-0.548604	0.0947837	5.78796	7.12453e-09	1.55868e-07	ENSMUSG00000031503.13	Col4a2	17875.2	21585.7	15864.5	12169.9	12622.9	13035.8
359.5381327850709	-0.807943	0.139954	5.77293	7.79028e-09	1.70029e-07	ENSMUSG00000020646.17	Mboat2	445.165	487.483	438.054	216.807	264.816	304.904
1861.7786442414517	0.488775	0.0847425	-5.76777	8.03283e-09	1.75026e-07	ENSMUSG00000016018.4	Mtrex	1541.17	1432.03	1677.92	2131.05	2104.12	2284.38
1479.8178552511238	0.477634	0.0828203	-5.76711	8.0643e-09	1.75416e-07	ENSMUSG00000026496.11	Parp1	1257.54	1159.93	1291.97	1714.81	1790.66	1663.99
7896.779530396286	0.372753	0.0647009	-5.76117	8.35307e-09	1.81391e-07	ENSMUSG00000027422.15	Rrbp1	6978.01	6925.05	6749.31	9136.11	8533.57	9058.63
299.9696543005886	3.50899	0.60933	-5.75876	8.47332e-09	1.83693e-07	ENSMUSG00000034459.8	Ifit1	42.2625	22.1957	81.0496	590.742	754.816	308.751
59.40082880985464	-1.79517	0.311867	5.7562	8.60292e-09	1.8619e-07	ENSMUSG00000020155.2	Kcnmb1	88.2817	101.936	85.874	16.6194	25.2206	38.4737
8874.53303598977	-0.450993	0.0783567	5.75564	8.63135e-09	1.86492e-07	ENSMUSG00000023067.14	Cdkn1a	9799.27	10996.7	9945.94	6854.73	7933.68	7716.86
770.0115770132228	-0.571771	0.0993664	5.75417	8.70681e-09	1.87808e-07	ENSMUSG00000034908.16	Sidt2	942.924	962.634	853.915	581.677	628.713	650.205
660.1762771011319	0.654908	0.113827	-5.75356	8.73844e-09	1.88082e-07	ENSMUSG00000035455.12	Fignl1	501.515	443.913	594.364	808.305	808.861	804.1
2112.75423536744	-0.431184	0.0749447	5.75336	8.74866e-09	1.88082e-07	ENSMUSG00000017144.8	Rnd3	2368.58	2417.68	2497.1	1810.75	1722.21	1860.2
584.6210869314308	-0.686101	0.119316	5.75028	8.9096e-09	1.91223e-07	ENSMUSG00000021835.15	Bmp4	736.307	751.365	669.624	460.809	511.618	378.004
46627.90040286271	-0.410047	0.0713938	5.74345	9.2768e-09	1.98773e-07	ENSMUSG00000001025.8	S100a6	51654.2	57734.2	50245.9	40875.3	38506.4	40751.3
346.59087021614926	-0.927263	0.161553	5.7397	9.48443e-09	2.02885e-07	ENSMUSG00000033174.17	Mgll	478.036	461.177	416.826	171.481	284.632	267.392
1481.3006928554573	0.501946	0.0875119	-5.73574	9.70858e-09	2.07315e-07	ENSMUSG00000006398.15	Cdc20	1231.25	1164.86	1285.21	1872.7	1715	1618.78
19.155843776882698	3.85958	0.67293	-5.73548	9.72365e-09	2.07315e-07	ENSMUSG00000035208.16	Slfn8	3.75667	0	3.8595	40.0375	43.2353	24.0461
740.2232308558579	0.577664	0.100769	-5.73257	9.89221e-09	2.1056e-07	ENSMUSG00000032218.7	Ccnb2	633.938	535.984	613.661	914.064	880.919	862.772
618.2926033296374	0.619717	0.108164	-5.72939	1.0079e-08	2.14183e-07	ENSMUSG00000028896.13	Rcc1	491.184	481.728	484.368	716.143	846.691	689.641
495.0988329735507	0.625109	0.109142	-5.72749	1.01925e-08	2.16238e-07	ENSMUSG00000028010.16	Gar1	405.72	369.928	390.775	575.634	634.118	594.418
236.6350770385079	0.888592	0.155176	-5.72634	1.02619e-08	2.17354e-07	ENSMUSG00000042606.9	Hirip3	151.206	147.149	199.729	307.458	317.059	297.209
1552.7795555677128	-0.535416	0.09362	5.71903	1.07133e-08	2.26542e-07	ENSMUSG00000020205.8	Phlda1	1861.43	1924.45	1733.88	1247.96	1133.13	1415.83
1090.6531249370462	-0.480562	0.0840631	5.71668	1.08625e-08	2.29322e-07	ENSMUSG00000015291.10	Gdi1	1266.94	1285.7	1259.16	932.195	916.949	882.971
248.64756736393312	-0.801111	0.140187	5.7146	1.09965e-08	2.3177e-07	ENSMUSG00000057880.12	Abat	323.073	318.138	305.866	184.324	187.353	173.132
302.53518556703256	-0.853057	0.149352	5.71172	1.11841e-08	2.35341e-07	ENSMUSG00000028289.12	Epha7	358.762	459.533	352.18	211.519	192.757	240.461
8832.095129523816	0.38282	0.067059	-5.7087	1.13839e-08	2.39155e-07	ENSMUSG00000001870.16	Ltbp1	7783.82	7891.79	7328.23	9895.31	9675.7	10417.7
199.3560324662685	1.22593	0.2148	-5.7073	1.1478e-08	2.40738e-07	ENSMUSG00000004730.15	Adgre1	123.031	83.0283	151.486	296.127	340.478	201.987
155.2464763424676	1.21961	0.213745	-5.70592	1.15716e-08	2.42308e-07	ENSMUSG00000030498.15	Gas2	100.491	59.1885	121.574	229.649	208.971	211.605
3180.9591123822806	0.470724	0.0825237	-5.7041	1.16957e-08	2.44511e-07	ENSMUSG00000024493.9	Lars	2655.96	2410.29	2936.12	3775.61	3662.39	3645.38
552.8701319865783	-0.711652	0.124807	5.70201	1.18401e-08	2.47128e-07	ENSMUSG00000039770.6	Ypel5	691.227	640.386	734.271	405.663	351.287	494.387
307.5560175622774	-0.823753	0.144525	5.69971	1.20012e-08	2.50086e-07	ENSMUSG00000001661.5	Hoxc6	396.328	436.515	351.215	234.182	183.75	243.346
588.9280436702666	0.615301	0.107964	-5.69912	1.20428e-08	2.50549e-07	ENSMUSG00000024151.13	Msh2	476.158	435.693	488.227	733.518	644.927	755.046
844.7142058678292	-0.561332	0.0985334	5.69687	1.22028e-08	2.53469e-07	ENSMUSG00000026576.12	Atp1b1	942.924	1107.32	970.665	701.79	680.956	664.633
32.69410161880308	2.43527	0.427666	-5.69434	1.23852e-08	2.56844e-07	ENSMUSG00000043017.9	Ptgir	12.2092	10.6868	7.71901	73.2762	57.6471	34.6263
1230.150975488524	-0.55146	0.0968583	5.69347	1.24483e-08	2.57738e-07	ENSMUSG00000009013.5	Dynll1	1479.19	1503.55	1407.75	1118.78	980	891.628
492.1713705856298	0.618677	0.10875	-5.68896	1.27815e-08	2.64212e-07	ENSMUSG00000007805.4	Twist2	415.112	377.326	371.477	587.721	608.897	592.495
36.59360257027218	2.06482	0.363392	-5.68208	1.33065e-08	2.74624e-07	ENSMUSG00000030351.5	Tspan11	13.1483	13.153	16.4029	67.9883	54.0441	54.825
6305.1878219332575	-0.38375	0.0675524	5.68078	1.34082e-08	2.7584e-07	ENSMUSG00000028173.10	Wls	7017.46	7208.66	7191.22	5260.78	5380.99	5772.02
33.66451011928613	2.81947	0.496309	-5.68088	1.34004e-08	2.7584e-07	ENSMUSG00000030921.17	Trim30a	3.75667	6.5765	14.4731	57.4123	91.875	27.8934
517.9168902550139	0.757956	0.133485	-5.67822	1.36103e-08	2.79554e-07	ENSMUSG00000019929.16	Dcn	387.876	329.647	436.124	689.703	718.787	545.365
843.4853678865695	0.518142	0.0912725	-5.67686	1.37187e-08	2.80885e-07	ENSMUSG00000017999.16	Ddx27	658.356	718.482	703.395	1004.72	1001.62	974.346
342.1459976561523	0.780265	0.137442	-5.67703	1.37054e-08	2.80885e-07	ENSMUSG00000021569.10	Trip13	248.879	219.491	285.603	429.081	477.39	392.432
2943.3293060128117	0.469781	0.0828183	-5.67243	1.40786e-08	2.87798e-07	ENSMUSG00000015176.11	Nolc1	2493.49	2247.52	2669.81	3499.13	3221.03	3529
355.5808846944657	-0.873425	0.154136	5.66658	1.45679e-08	2.97328e-07	ENSMUSG00000018339.11	Gpx3	439.53	512.145	419.721	198.677	315.257	248.155
125.12358187206064	-1.18739	0.209823	5.65902	1.52241e-08	3.1023e-07	ENSMUSG00000071042.12	Rasgrp3	154.963	212.092	153.415	80.0751	82.8677	67.329
326.5998407995043	-0.716043	0.126591	5.65634	1.54632e-08	3.14606e-07	ENSMUSG00000026437.11	Cdk18	402.903	424.184	389.81	236.448	250.404	255.85
3418.4984941747325	-0.452848	0.0801529	5.6498	1.60631e-08	3.26296e-07	ENSMUSG00000038366.15	Lasp1	3930.41	4150.59	3768.81	3053.43	2974.23	2633.52
916.942587398951	-0.621515	0.110088	5.64563	1.6458e-08	3.33792e-07	ENSMUSG00000035441.14	Myo1d	1047.17	1136.91	1152.06	644.378	673.75	847.383
284.29681929576924	-0.774546	0.137243	5.64362	1.66513e-08	3.37181e-07	ENSMUSG00000041624.10	Gucy1a2	343.735	349.376	386.915	225.117	190.956	209.682
308.93877623601986	0.81893	0.145274	-5.63713	1.72908e-08	3.49583e-07	ENSMUSG00000019214.14	Chtf18	224.461	232.644	209.378	382.245	470.184	334.721
82.84011195915213	1.44156	0.25578	-5.63593	1.74117e-08	3.51477e-07	ENSMUSG00000026946.9	Nmi	46.0192	32.8825	54.0331	108.781	149.522	105.803
4078.4590752811396	0.411975	0.0731476	-5.63211	1.78021e-08	3.58796e-07	ENSMUSG00000003226.7	Ranbp2	3492.76	3431.29	3583.55	4741.8	4321.73	4899.62
1586.4928176068993	0.436417	0.0775323	-5.62884	1.81427e-08	3.65089e-07	ENSMUSG00000022407.10	Adsl	1336.43	1341.61	1363.37	1788.09	1902.35	1787.1
1366.200005440636	-0.481586	0.0857665	5.61509	1.96463e-08	3.94732e-07	ENSMUSG00000028048.11	Gba	1686.74	1583.29	1501.35	1087.81	1194.38	1143.63
83.49880103565012	-1.53642	0.274049	5.60636	2.06629e-08	4.14512e-07	ENSMUSG00000035916.8	Ptprq	114.578	131.53	120.61	33.2387	70.2574	30.779
613.5644226189537	0.584505	0.104351	-5.60132	2.12727e-08	4.26081e-07	ENSMUSG00000027905.15	Ddx20	487.428	453.778	531.647	712.366	744.008	752.161
525.3318204766872	0.706309	0.126379	-5.58883	2.28603e-08	4.5717e-07	ENSMUSG00000002227.15	Mov10	391.633	450.49	353.145	694.236	700.772	561.716
1355.0150211439538	0.614443	0.110003	-5.58569	2.3277e-08	4.64784e-07	ENSMUSG00000069274.3	H4c6	1110.1	951.948	1153.03	1877.99	1623.13	1413.91
265.89856333974427	-0.771073	0.138052	5.58539	2.33182e-08	4.64887e-07	ENSMUSG00000026667.14	Uhmk1	320.256	329.647	357.969	200.943	185.552	201.025
58.71143221800982	-1.80818	0.323921	5.58216	2.37543e-08	4.72851e-07	ENSMUSG00000045539.3	Sprr3	80.7684	84.6724	107.101	14.3531	28.8235	36.55
33142.87950583608	0.362836	0.0650077	-5.58143	2.38555e-08	4.74133e-07	ENSMUSG00000034994.10	Eef2	28934.8	30584.8	27470	37711.6	37387.7	36768.3
1560.342174033377	0.458573	0.0821794	-5.58015	2.40318e-08	4.76604e-07	ENSMUSG00000040945.13	Rcc2	1340.19	1358.87	1243.73	1880.25	1823.09	1715.93
463.73429352013216	-0.616478	0.11048	5.57999	2.40537e-08	4.76604e-07	ENSMUSG00000071379.2	Hpcal1	580.405	556.536	549.979	375.446	345.882	374.157
1873.0105734519216	-0.497841	0.0893216	5.57358	2.49557e-08	4.92961e-07	ENSMUSG00000025510.14	Cd151	2158.21	2376.58	2036.85	1423.22	1646.54	1596.66
19.489190454401804	3.41872	0.613362	-5.57374	2.49327e-08	4.92961e-07	ENSMUSG00000032661.9	Oas3	0.939167	2.46619	6.75413	43.8147	36.0294	26.9316
190.20175163152544	0.969901	0.174067	-5.57201	2.51813e-08	4.96657e-07	ENSMUSG00000021998.16	Lcp1	126.788	107.69	150.521	256.845	281.03	218.338
260.8212823476445	0.958508	0.172102	-5.56944	2.55565e-08	5.03288e-07	ENSMUSG00000041498.13	Kif14	189.712	136.462	209.378	387.533	279.228	362.615
2541.3420596820883	-0.461111	0.0828397	5.5663	2.60198e-08	5.1163e-07	ENSMUSG00000027276.7	Jag1	2732.04	3177.27	2915.86	2111.41	2275.26	2036.22
689.3977407863846	0.577438	0.103821	-5.56187	2.66904e-08	5.24018e-07	ENSMUSG00000029191.16	Rfc1	570.074	517.899	576.031	828.701	753.015	890.666
219.45361258715405	0.863394	0.155318	-5.55889	2.71494e-08	5.32218e-07	ENSMUSG00000017550.14	Atad5	154.963	138.106	175.607	277.241	263.015	307.79
28457.45942556427	-0.578403	0.104079	5.55734	2.73922e-08	5.36163e-07	ENSMUSG00000031502.11	Col4a1	32591	40713.4	28949.2	20694.1	24255	23542
1635.6253869796349	-0.499266	0.0898999	5.55358	2.79876e-08	5.46989e-07	ENSMUSG00000056999.15	Ide	2005.12	1783.87	1964.49	1321.24	1252.02	1487.01
1642.690395226897	-0.595079	0.107265	5.54772	2.89413e-08	5.6477e-07	ENSMUSG00000021453.2	Gadd45g	1817.29	2342.05	1769.58	1380.16	1331.29	1215.77
30.92818266115711	2.53747	0.457709	-5.54385	2.95892e-08	5.76543e-07	ENSMUSG00000074896.3	Ifit3	10.3308	4.93237	12.5434	76.2979	46.8383	34.6263
4824.238129714657	-0.476001	0.0859427	5.53859	3.04922e-08	5.9324e-07	ENSMUSG00000021806.4	Nid2	5579.59	5910.62	5340.59	4157.1	4406.4	3551.12
511.6678706497918	-0.642227	0.11633	5.52073	3.37601e-08	6.55831e-07	ENSMUSG00000034880.7	Mrpl34	618.911	686.422	562.523	401.886	425.147	375.118
467.34213749202735	0.66545	0.120851	-5.50634	3.66365e-08	7.10638e-07	ENSMUSG00000048285.9	Frmd6	346.553	323.07	413.932	559.015	601.691	559.792
613.7542692813427	0.623549	0.113432	-5.49709	3.86111e-08	7.47814e-07	ENSMUSG00000050965.14	Prkca	499.637	453.778	498.841	839.277	720.588	670.404
621.1656032390067	-0.690972	0.125811	5.49212	3.97131e-08	7.68006e-07	ENSMUSG00000031839.7	Hsbp1	796.414	750.543	765.147	529.553	362.096	523.242
1394.588599932376	-0.441747	0.0805	5.48754	4.07566e-08	7.87006e-07	ENSMUSG00000001729.14	Akt1	1646.36	1595.62	1572.75	1145.22	1232.21	1175.37
1902.2877753655096	0.611806	0.111498	-5.48717	4.08431e-08	7.87497e-07	ENSMUSG00000022360.8	Atad2	1577.8	1201.03	1739.67	2332	2179.78	2383.44
199.95635755811784	1.19581	0.217994	-5.48554	4.12205e-08	7.93587e-07	ENSMUSG00000025089.15	Gfra1	124.909	70.6973	169.818	271.953	288.235	274.125
1008.133969284957	-0.559079	0.101924	5.48523	4.1292e-08	7.9378e-07	ENSMUSG00000006219.12	Fblim1	1238.76	1302.97	1058.47	759.202	830.478	858.925
1559.0330026257175	-0.563724	0.10283	5.48209	4.20331e-08	8.06824e-07	ENSMUSG00000003541.6	Ier3	1760.94	2108.59	1715.55	1257.78	1120.52	1390.82
962.8526620094813	0.477136	0.0870662	-5.48016	4.24944e-08	8.14465e-07	ENSMUSG00000020923.17	Ubtf	806.744	804.799	804.707	1162.6	1113.31	1084.96
39.7177092928271	2.18918	0.399798	-5.47572	4.35749e-08	8.33935e-07	ENSMUSG00000025780.7	Itih5	15.9658	9.86474	17.3678	89.1402	68.4559	37.5118
674.0620994956507	0.716941	0.131038	-5.47123	4.46924e-08	8.54056e-07	ENSMUSG00000068855.3	H2ac20	509.968	403.632	619.45	861.185	785.441	864.696
116.77366628286283	-1.15487	0.211185	5.4685	4.53852e-08	8.66012e-07	ENSMUSG00000079415.2	Cntf	150.267	190.718	141.837	64.9666	72.0588	80.7947
3311.3581939116984	0.368939	0.0674758	-5.46772	4.55869e-08	8.68574e-07	ENSMUSG00000031386.14	Hcfc1	2829.71	2939.69	2899.45	3679.68	3772.28	3747.34
125.72400951646365	1.03278	0.18893	-5.4665	4.59018e-08	8.73286e-07	ENSMUSG00000030157.5	Clec2d	82.6467	76.4518	88.7686	173.748	171.14	161.589
2395.561298866549	-0.434883	0.0796164	5.46224	4.70174e-08	8.93192e-07	ENSMUSG00000026727.10	Rsu1	2658.78	2973.4	2633.15	2066.84	1949.19	2092.01
1930.8545059941066	-0.464686	0.0852113	5.45334	4.94338e-08	9.37716e-07	ENSMUSG00000006301.17	Tmbim1	2202.35	2229.43	2279.04	1454.19	1704.19	1715.93
1513.081436491158	0.454022	0.0832842	-5.45148	4.99528e-08	9.46169e-07	ENSMUSG00000029250.5	Polr2b	1312.02	1182.12	1339.25	1739.74	1709.6	1795.76
295.1678266790793	-0.885359	0.162464	5.44955	5.04964e-08	9.55063e-07	ENSMUSG00000038235.4	F11r	377.545	435.693	330.952	161.661	232.39	232.766
695.2744692701506	-0.628168	0.11528	5.44906	5.06361e-08	9.56303e-07	ENSMUSG00000062380.4	Tubb3	866.851	734.923	925.316	506.89	612.5	525.166
556.3809724244759	0.70342	0.12914	-5.44697	5.12353e-08	9.66205e-07	ENSMUSG00000039501.14	Znfx1	409.477	468.575	386.915	688.192	807.059	578.067
2021.6489719406231	-0.451402	0.0829132	5.44427	5.20188e-08	9.79549e-07	ENSMUSG00000028035.13	Dnajb4	2364.82	2296.84	2350.44	1659.67	1583.49	1874.63
730.09457178169	-0.605753	0.111331	5.44103	5.29737e-08	9.96075e-07	ENSMUSG00000028737.15	Aldh4a1	838.676	1012.78	794.093	599.807	549.449	585.762
812.612552945557	0.56762	0.104394	-5.43729	5.40972e-08	1.01424e-06	ENSMUSG00000046879.7	Irgm1	628.303	601.749	731.376	916.331	1046.65	951.262
191.75416082085246	-0.862038	0.158536	5.43748	5.40402e-08	1.01424e-06	ENSMUSG00000041073.10	Nacad	249.818	255.661	234.465	126.156	145.919	138.505
732.0339754099523	-0.563701	0.103742	5.4337	5.51977e-08	1.03217e-06	ENSMUSG00000039103.12	Nexn	918.505	825.35	880.932	579.411	536.838	651.167
470.3011383899939	0.618103	0.113755	-5.43365	5.52133e-08	1.03217e-06	ENSMUSG00000037003.16	Tns2	401.024	355.953	356.039	592.253	583.677	532.861
10702.292297028915	0.36193	0.0666536	-5.43001	5.63518e-08	1.05193e-06	ENSMUSG00000001131.11	Timp1	9106.16	9329.58	9663.23	11465.8	12082.5	12566.5
3370.2676431912614	0.364969	0.0672276	-5.42886	5.67164e-08	1.05449e-06	ENSMUSG00000022962.15	Gart	2964.01	2961.07	2912.96	3721.98	3792.1	3869.49
64.66582923699724	-1.46538	0.269919	5.42895	5.6688e-08	1.05449e-06	ENSMUSG00000054293.10	P2ry10b	85.4642	101.114	97.4525	29.4616	36.0294	38.4737
5696.330148234711	-0.505968	0.0932007	5.4288	5.67343e-08	1.05449e-06	ENSMUSG00000015837.15	Sqstm1	6601.4	7644.35	5810.48	4586.94	4536.1	4998.69
14214.500708990905	-0.363654	0.0670143	5.42651	5.74674e-08	1.06658e-06	ENSMUSG00000021186.9	Fbln5	16705	14945.1	16341.1	12399.5	12392.3	12503.9
2750.069167314048	0.560953	0.103394	-5.4254	5.78243e-08	1.07166e-06	ENSMUSG00000030268.17	Bcat1	2212.68	1848	2608.06	3379.02	3251.66	3201.01
6935.288694002951	0.364069	0.0671216	-5.42402	5.82742e-08	1.07845e-06	ENSMUSG00000048612.16	Myof	6187.23	6040.51	5973.55	8164.63	7420.26	7825.55
8796.863509094288	-0.358813	0.0661751	5.42217	5.88788e-08	1.08808e-06	ENSMUSG00000020585.4	Laptm4a	9666.85	10050.5	9945.94	7805.81	7308.57	8003.49
479.46146159914304	-0.652693	0.120408	5.42067	5.93747e-08	1.09567e-06	ENSMUSG00000062960.10	Kdr	615.154	635.454	509.455	376.957	353.088	386.661
91.18102084908732	1.33214	0.245841	-5.41871	6.00301e-08	1.10618e-06	ENSMUSG00000031298.15	Adgrg2	44.1408	55.0781	56.9277	164.683	124.302	101.955
673.6275067976894	-0.530148	0.0979222	5.41398	6.16394e-08	1.13422e-06	ENSMUSG00000055407.14	Map6	813.319	797.4	781.55	568.835	517.022	563.64
172.72132687489528	-0.977533	0.180586	5.41311	6.19411e-08	1.13815e-06	ENSMUSG00000023809.10	Rps6ka2	219.765	273.747	193.94	114.069	111.691	123.116
497.38531872928036	0.682538	0.126097	-5.41281	6.20425e-08	1.13839e-06	ENSMUSG00000024056.10	Ndc80	395.389	319.782	434.194	645.888	563.86	625.197
657.4131836524709	0.794928	0.146889	-5.41177	6.24054e-08	1.14342e-06	ENSMUSG00000028664.14	Ephb2	496.819	374.86	569.277	876.293	952.978	674.251
991.0120841822743	0.463519	0.0857628	-5.40466	6.49323e-08	1.18803e-06	ENSMUSG00000047710.8	Champ1	818.954	851.656	827.864	1159.58	1165.55	1122.47
567.4253323371279	-0.567471	0.105023	5.4033	6.54272e-08	1.19539e-06	ENSMUSG00000041895.15	Wipi1	631.12	698.753	703.395	452.5	450.368	468.417
931.7420513109952	-0.470239	0.0870569	5.40151	6.60805e-08	1.20562e-06	ENSMUSG00000021948.17	Prkcd	1096.01	1091.7	1059.43	787.908	778.236	777.169
574.4409140821301	0.633296	0.117271	-5.40029	6.65346e-08	1.21219e-06	ENSMUSG00000040034.15	Nup43	432.017	401.166	516.209	684.415	753.015	659.824
800.8404049643171	0.598645	0.110865	-5.39976	6.67314e-08	1.21406e-06	ENSMUSG00000034906.15	Ncaph	627.364	583.664	706.289	1072.7	850.294	964.728
2903.68860743073	0.374024	0.0693126	-5.39619	6.80702e-08	1.23667e-06	ENSMUSG00000067150.6	Xpo5	2563.93	2467.01	2554.99	3244.55	3357.94	3233.71
362.08100840982246	1.58435	0.293836	-5.39196	6.96942e-08	1.2644e-06	ENSMUSG00000038507.6	Parp12	217.887	128.242	196.835	545.417	664.743	419.363
965.9519209365917	0.504601	0.0936353	-5.389	7.08496e-08	1.28355e-06	ENSMUSG00000035021.13	Baz1a	785.144	748.076	863.564	1087.06	1125.92	1185.95
25.717299515042924	-2.5369	0.471294	5.38284	7.33216e-08	1.32647e-06	ENSMUSG00000067438.5	Hmx1	44.1408	45.2134	40.5248	6.0434	12.6103	5.77105
861.2162453515618	0.520059	0.0966202	-5.38251	7.34554e-08	1.32703e-06	ENSMUSG00000015766.14	Eps8	757.908	639.564	727.517	1016.8	994.412	1031.09
645.0825892576555	0.719665	0.133771	-5.37983	7.45567e-08	1.34504e-06	ENSMUSG00000069270.6	H2ac6	503.393	382.259	580.855	860.429	725.993	817.566
726.6341323222027	0.583832	0.108555	-5.3782	7.52333e-08	1.35535e-06	ENSMUSG00000069266.5	H4c2	586.04	521.187	641.643	948.814	821.471	840.65
392.11860297260773	0.703379	0.130826	-5.37645	7.59689e-08	1.3667e-06	ENSMUSG00000022364.14	Tbc1d31	302.412	258.949	334.812	520.488	493.603	442.447
933.5282117990897	0.532223	0.099051	-5.37322	7.73434e-08	1.38949e-06	ENSMUSG00000037313.16	Tacc3	725.976	704.507	861.634	1121.81	1077.28	1109.97
424.5096556411979	-0.684246	0.127493	5.36692	8.00946e-08	1.43691e-06	ENSMUSG00000021913.8	Ogdhl	530.629	585.308	455.421	320.3	306.25	349.149
3548.296355464435	-0.512244	0.095464	5.36584	8.05751e-08	1.44353e-06	ENSMUSG00000005413.8	Hmox1	3935.11	4883.87	3694.51	2928.03	2930.99	2917.27
1278.3151620947285	-0.477905	0.0890717	5.3654	8.07713e-08	1.44503e-06	ENSMUSG00000013076.17	Amotl1	1460.4	1585.76	1417.4	1010.76	1053.86	1141.71
692.4268390648353	0.531259	0.0990309	-5.36458	8.11398e-08	1.44961e-06	ENSMUSG00000028873.16	Cdca8	573.831	523.653	602.083	818.125	825.074	811.795
262.37995431543413	1.00395	0.1872	-5.36301	8.1847e-08	1.46023e-06	ENSMUSG00000028339.17	Col15a1	166.233	134.818	221.921	373.18	410.735	267.392
1510.333403903844	0.421387	0.0786252	-5.35944	8.34816e-08	1.48733e-06	ENSMUSG00000037236.16	Matr3	1234.07	1313.65	1326.7	1730.68	1715	1741.9
278.71825947689786	0.798309	0.149067	-5.35538	8.53773e-08	1.51901e-06	ENSMUSG00000026669.14	Mcm10	219.765	175.099	218.062	401.131	335.074	323.179
210.13481649657575	-0.946359	0.176734	5.35471	8.56923e-08	1.52251e-06	ENSMUSG00000019124.10	Scrn1	240.427	326.359	268.236	163.927	109.89	151.971
42.85022514845466	2.07593	0.38771	-5.35433	8.58717e-08	1.5236e-06	ENSMUSG00000055301.8	Adh7	8.4525	15.6192	25.0868	80.8305	82.8677	44.2447
21.436960091085613	2.86535	0.53543	-5.35149	8.7231e-08	1.5456e-06	ENSMUSG00000003665.7	Has1	1.87833	6.5765	6.75413	33.9941	48.6397	30.779
2450.8703054594025	-0.423853	0.0792441	5.3487	8.85865e-08	1.56746e-06	ENSMUSG00000028480.14	Glipr2	2887	2856.67	2681.39	1977.7	2053.68	2248.79
724.3083548195618	-0.532125	0.0995582	5.34486	9.04855e-08	1.59887e-06	ENSMUSG00000024639.5	Gnaq	856.52	795.756	919.527	602.074	574.669	597.304
2310.8620875280853	-0.472757	0.0884902	5.34248	9.16853e-08	1.61785e-06	ENSMUSG00000034707.7	Gns	2671.93	2991.48	2393.86	1953.53	1938.38	1915.99
334.0988284795679	-0.711949	0.133358	5.33864	9.36481e-08	1.65023e-06	ENSMUSG00000029090.12	Adgra3	421.686	458.711	363.758	248.535	252.206	259.697
71.96234300635234	1.35787	0.2545	-5.33544	9.53139e-08	1.67729e-06	ENSMUSG00000059336.14	Slc14a1	49.7758	34.5266	37.6302	106.515	93.6765	109.65
1220.0391850451658	0.453112	0.0849456	-5.33415	9.59925e-08	1.68464e-06	ENSMUSG00000017264.16	Exosc10	1034.96	1027.58	1025.66	1453.44	1462.79	1315.8
98.59769033171693	-1.36398	0.255704	5.3342	9.59647e-08	1.68464e-06	ENSMUSG00000029019.8	Nppb	150.267	161.124	115.785	42.3038	43.2353	78.8711
221.6667769667271	-1.06333	0.199378	5.33327	9.64587e-08	1.69052e-06	ENSMUSG00000038253.6	Hoxa5	310.864	375.682	215.167	174.503	129.706	124.078
84.17910174963899	-1.25643	0.235619	5.33245	9.68989e-08	1.69593e-06	ENSMUSG00000032322.14	Pstpip1	122.092	121.665	114.82	52.8798	37.8309	55.7868
143.982048556647	0.974903	0.182917	-5.32976	9.83411e-08	1.71884e-06	ENSMUSG00000078452.10	Raet1d	101.43	83.8503	106.136	176.769	192.757	202.949
72.46834792602526	-1.82731	0.342871	5.32944	9.85143e-08	1.71954e-06	ENSMUSG00000051747.15	Ttn	64.8025	111.8	160.169	18.1302	41.4338	38.4737
2221.1908574485815	0.544448	0.102227	-5.32587	1.00472e-07	1.75133e-06	ENSMUSG00000060981.7	H4c8	1833.25	1552.05	2039.75	2905.36	2552.68	2444.04
73.55740870978175	-1.43213	0.269115	5.32161	1.02854e-07	1.79044e-06	ENSMUSG00000025701.12	Alox5	99.5517	132.352	92.6281	47.5918	28.8235	40.3974
546.6677245376108	0.575049	0.10812	-5.31861	1.04563e-07	1.81774e-06	ENSMUSG00000024078.7	Ttc27	458.313	400.344	461.211	677.616	632.316	650.205
128.8562498458341	1.34806	0.253561	-5.3165	1.05782e-07	1.83645e-06	ENSMUSG00000072941.5	Sod3	80.7684	53.434	84.9091	250.046	183.75	120.23
2142.2075540692604	0.49651	0.0934442	-5.31344	1.07574e-07	1.86505e-06	ENSMUSG00000000568.15	Hnrnpd	1837.01	1633.44	1869.93	2727.84	2199.6	2585.43
880.6247087401854	-0.502752	0.0946642	5.31089	1.0909e-07	1.88879e-06	ENSMUSG00000020132.10	Rab21	1096.95	1035.8	967.771	725.963	693.566	763.703
2589.0884163219234	-0.45969	0.0865828	5.30925	1.10075e-07	1.90329e-06	ENSMUSG00000025579.14	Gaa	2983.73	3325.24	2686.21	2202.82	2132.94	2203.58
516.296057504296	-0.659321	0.124214	5.30795	1.10863e-07	1.91435e-06	ENSMUSG00000028347.14	Tmeff1	606.702	657.65	633.924	355.05	369.302	475.15
12036.877591698289	0.328824	0.0619591	-5.30711	1.11378e-07	1.92068e-06	ENSMUSG00000001440.5	Kpnb1	10659.5	10356.3	10997.7	13260.7	13412	13535
1461.9505659900644	-0.455575	0.0858563	5.30625	1.11905e-07	1.92719e-06	ENSMUSG00000026385.16	Dbi	1622.88	1659.74	1795.63	1316.71	1176.36	1200.38
842.2637507328506	-0.504652	0.0951101	5.30598	1.12067e-07	1.92741e-06	ENSMUSG00000050912.15	Tmem123	973.916	930.574	1061.36	687.437	682.758	717.534
1313.0828995922109	0.421119	0.0794478	-5.30058	1.15436e-07	1.98197e-06	ENSMUSG00000022325.14	Pop1	1117.61	1123.76	1125.05	1493.48	1540.26	1478.35
2665.991560150192	0.449842	0.0848693	-5.3004	1.15547e-07	1.98197e-06	ENSMUSG00000019942.13	Cdk1	2315.99	2020.63	2425.7	3188.65	3121.95	2923.04
715.7875979888018	0.577824	0.10914	-5.29436	1.19433e-07	2.04591e-06	ENSMUSG00000048327.6	Ckap2l	573.831	505.568	646.467	906.51	832.28	830.07
1363.042917096765	0.523354	0.0988832	-5.29265	1.20555e-07	2.06238e-06	ENSMUSG00000020680.15	Taf15	1169.26	980.72	1208.02	1525.96	1545.66	1748.63
1057.979701477738	-0.508364	0.0960968	5.29013	1.22232e-07	2.08831e-06	ENSMUSG00000030557.17	Mef2a	1288.54	1247.07	1201.27	938.238	763.824	908.941
6341.946901667756	0.366139	0.0692577	-5.28663	1.24593e-07	2.12583e-06	ENSMUSG00000030662.10	Ipo5	5452.8	5551.38	5628.12	7387.3	6667.24	7364.83
28.669470082146297	2.18571	0.413544	-5.28531	1.25495e-07	2.13839e-06	ENSMUSG00000026536.9	Ifi211	11.27	7.39856	12.5434	46.8364	46.8383	47.1303
111.43330996923964	-1.09222	0.206726	5.28341	1.26803e-07	2.15783e-06	ENSMUSG00000019779.15	Frk	169.989	152.081	134.118	75.5425	66.6544	70.2145
998.9897261250762	0.469261	0.0888831	-5.27952	1.2952e-07	2.20116e-06	ENSMUSG00000040325.16	Dcaf1	787.022	845.08	879.967	1130.87	1187.17	1163.83
2957.9232558673657	0.392388	0.0743569	-5.27709	1.31251e-07	2.22764e-06	ENSMUSG00000031558.15	Slit2	2570.5	2603.47	2501.92	3559.56	3339.93	3172.16
35.75064590159739	2.13681	0.405324	-5.27187	1.35043e-07	2.28898e-06	ENSMUSG00000035042.2	Ccl5	13.1483	7.39856	19.2975	64.9666	70.2574	39.4355
902.7110723619242	0.491452	0.0932568	-5.26988	1.36512e-07	2.31086e-06	ENSMUSG00000035284.10	Vps13c	725.976	769.45	760.322	1126.34	980	1054.18
1492.5279350823344	-1.18556	0.22503	5.26844	1.37588e-07	2.32339e-06	ENSMUSG00000035969.15	Rusc2	1932.81	2628.95	1658.62	824.924	870.111	1039.75
39909.68799638406	-0.397601	0.075469	5.26841	1.37613e-07	2.32339e-06	ENSMUSG00000019997.11	Ccn2	44142.7	49810.4	42168.9	33144.3	34247.8	35944
1106.897092873004	0.48561	0.0923129	-5.26047	1.43685e-07	2.42274e-06	ENSMUSG00000037475.15	Thoc2	880.939	873.03	1015.05	1268.36	1257.43	1346.58
276.80747708351515	0.793879	0.150941	-5.25952	1.44431e-07	2.43214e-06	ENSMUSG00000030761.16	Myo7a	248.879	180.854	178.502	349.762	344.081	358.767
10855.754135580693	-0.350558	0.0666552	5.25927	1.44627e-07	2.43227e-06	ENSMUSG00000018340.13	Anxa6	11699.2	12687.7	12123.7	9683.79	9137.06	9803.1
1326.885967441022	-0.418108	0.0795377	5.25673	1.46636e-07	2.46284e-06	ENSMUSG00000027799.12	Nbea	1531.78	1531.5	1489.77	1121.05	1134.93	1152.29
32.96505560339186	-2.3339	0.444046	5.25598	1.47236e-07	2.46969e-06	ENSMUSG00000026579.8	F5	47.8975	80.5621	35.7004	7.55425	12.6103	13.4658
2232.571724826249	0.531012	0.101056	-5.25461	1.48338e-07	2.48495e-06	ENSMUSG00000027469.16	Tpx2	1841.71	1530.68	2109.22	2689.31	2597.72	2626.79
14.840136316475864	4.99367	0.950964	-5.25117	1.5114e-07	2.5286e-06	ENSMUSG00000039997.16	Ifi203	0.939167	0.822062	0.964876	32.4833	28.8235	25.0079
34.62471947170644	-2.01806	0.384515	5.24831	1.53497e-07	2.56471e-06	ENSMUSG00000048582.7	Gja3	59.1675	60.8326	45.3492	12.8422	18.0147	11.5421
1649.0312892675079	0.453963	0.0865012	-5.24806	1.5371e-07	2.56495e-06	ENSMUSG00000037725.8	Ckap2	1437.86	1277.48	1465.65	1966.37	1779.85	1966.97
441.34797923134806	0.618408	0.117857	-5.24709	1.54523e-07	2.57518e-06	ENSMUSG00000020471.11	Pold2	344.674	345.266	357.004	592.253	511.618	497.272
2371.869900844181	0.413074	0.0787824	-5.24323	1.57788e-07	2.62621e-06	ENSMUSG00000057113.13	Npm1	2046.44	1899.79	2162.29	2735.39	2594.12	2793.19
1001.166504208876	0.444531	0.0848145	-5.24121	1.59526e-07	2.65171e-06	ENSMUSG00000037465.10	Klf10	853.703	846.724	845.231	1159.58	1133.13	1168.64
376.3011003890185	-0.660909	0.126167	5.23835	1.62018e-07	2.68967e-06	ENSMUSG00000052331.14	Ankrd44	450.8	485.839	446.738	268.176	279.228	327.026
595.0354290984181	0.546332	0.104408	-5.23265	1.67093e-07	2.77035e-06	ENSMUSG00000024188.16	Luc7l	520.299	449.668	483.403	725.208	682.758	708.878
268.0614489568296	-0.824242	0.157728	5.22573	1.73471e-07	2.8724e-06	ENSMUSG00000029364.15	Wsb2	341.857	389.657	293.322	203.965	217.978	161.589
493.96217107643145	0.667367	0.127757	-5.2237	1.75382e-07	2.90032e-06	ENSMUSG00000027306.15	Nusap1	372.849	323.892	451.562	635.312	567.463	612.693
225.56675734116968	0.855631	0.163971	-5.2182	1.80669e-07	2.98393e-06	ENSMUSG00000032113.16	Chek1	140.875	143.861	198.764	314.257	273.824	281.82
378.8333031404216	0.651033	0.124844	-5.21479	1.84028e-07	3.03553e-06	ENSMUSG00000042489.15	Clspn	283.628	295.12	304.901	494.048	484.596	410.707
400.64666482981346	-0.664794	0.12754	5.21243	1.86385e-07	3.07048e-06	ENSMUSG00000047731.17	Wbp1l	475.218	549.959	444.808	287.062	333.272	313.561
877.2327557326895	0.483831	0.0928512	-5.21082	1.88007e-07	3.09324e-06	ENSMUSG00000032834.11	Pwp2	742.881	771.916	678.308	1000.94	1028.64	1040.71
1770.213362608465	0.446499	0.085734	-5.20795	1.90934e-07	3.1374e-06	ENSMUSG00000027620.16	Rbm39	1556.2	1352.29	1589.15	2003.39	2003.24	2117.01
1966.6229982497935	-0.408862	0.0785352	5.2061	1.92852e-07	3.16468e-06	ENSMUSG00000032340.8	Neo1	2171.35	2395.49	2165.18	1713.3	1651.95	1702.46
268.2506501878537	-0.776527	0.149164	5.20587	1.93085e-07	3.16468e-06	ENSMUSG00000004285.12	Atp6v1f	321.195	324.714	371.477	177.525	183.75	230.842
1251.0072187233732	0.551759	0.106063	-5.20217	1.96971e-07	3.22428e-06	ENSMUSG00000101972.1	H3c11	998.334	919.065	1125.05	1574.31	1603.31	1285.98
371.6862106678939	0.6354	0.122149	-5.20186	1.97309e-07	3.22571e-06	ENSMUSG00000036916.13	Zfp280c	294.898	264.704	314.55	448.722	450.368	456.875
1262.3218870866801	-0.606262	0.116581	5.20034	1.98928e-07	3.24807e-06	ENSMUSG00000042331.13	Specc1	1596.58	1567.67	1406.79	840.033	954.78	1208.07
1236.991774980278	0.427802	0.0823126	-5.19729	2.02217e-07	3.2976e-06	ENSMUSG00000036693.12	Nop14	1075.35	1025.93	1065.22	1397.54	1385.33	1472.58
710.8482403905089	-0.589362	0.113447	5.19504	2.04681e-07	3.33355e-06	ENSMUSG00000036026.15	Tmem63b	860.277	954.414	742.955	522.754	599.89	584.8
539.832785798732	-0.560691	0.107975	5.1928	2.07151e-07	3.36954e-06	ENSMUSG00000052920.16	Prkg1	658.356	632.166	645.502	453.255	390.919	458.799
703.4825519664804	0.776874	0.149618	-5.19238	2.07626e-07	3.373e-06	ENSMUSG00000067586.4	S1pr3	566.318	379.793	609.802	966.944	958.383	739.657
658.6625209993394	0.534437	0.103013	-5.18808	2.12475e-07	3.44744e-06	ENSMUSG00000023953.9	Polh	546.595	493.237	576.031	812.082	772.831	751.199
273.17293923188004	0.790108	0.152323	-5.18706	2.13636e-07	3.45757e-06	ENSMUSG00000028599.10	Tnfrsf1b	222.583	174.277	204.554	388.288	353.088	296.247
33.78431758147199	2.21593	0.427189	-5.18724	2.13428e-07	3.45757e-06	ENSMUSG00000060044.8	Tmem26	6.57417	12.3309	17.3678	79.3196	48.6397	38.4737
950.0195029312001	-0.500604	0.0965246	5.18628	2.14533e-07	3.46775e-06	ENSMUSG00000036206.12	Sh3bp4	1092.25	1175.55	1067.15	807.549	844.89	712.725
129.9560232582771	1.04573	0.201929	-5.17868	2.23457e-07	3.60747e-06	ENSMUSG00000029798.11	Herc6	96.7342	76.4518	80.0847	180.547	203.566	142.353
6733.806263024508	0.413902	0.0799852	-5.17474	2.28234e-07	3.67999e-06	ENSMUSG00000026615.14	Eprs	5680.08	5265.31	6382.66	7761.99	7396.84	7915.96
1052.6043461158588	0.583222	0.112725	-5.17384	2.29337e-07	3.69287e-06	ENSMUSG00000069310.4	H3c3	857.459	898.514	771.901	1435.31	1293.46	1058.99
246.14297046528333	0.987289	0.190832	-5.17362	2.29605e-07	3.69287e-06	ENSMUSG00000026072.12	Il1r1	164.354	128.242	204.554	409.44	313.456	256.812
340.81245021610493	0.640233	0.123776	-5.17253	2.30951e-07	3.70989e-06	ENSMUSG00000090290.2	Tarbp1	253.575	271.28	274.99	405.663	401.728	437.638
975.859967893616	0.503504	0.0973806	-5.17048	2.33498e-07	3.74614e-06	ENSMUSG00000038736.10	Nudcd1	780.448	748.898	889.616	1089.32	1219.6	1127.28
800.6398735270553	-0.493174	0.0954163	5.16865	2.35785e-07	3.77813e-06	ENSMUSG00000034781.5	Gna11	985.186	941.261	883.826	694.236	653.934	645.396
586.4240226461325	-0.603995	0.116874	5.16794	2.36694e-07	3.78798e-06	ENSMUSG00000074247.10	Dda1	692.166	802.332	631.029	494.048	430.552	468.417
2097.8385980040853	-0.381216	0.0738065	5.16508	2.40342e-07	3.8416e-06	ENSMUSG00000049470.13	Aff4	2411.78	2383.98	2325.35	1783.56	1794.27	1888.1
4611.738905748313	1.0275	0.199092	-5.16096	2.45693e-07	3.92227e-06	ENSMUSG00000025492.6	Ifitm3	3123.67	2358.5	3625.04	6752.74	6422.24	5388.24
782.0716074609606	0.523167	0.101381	-5.16042	2.46402e-07	3.92873e-06	ENSMUSG00000024912.6	Fosl1	651.782	595.995	683.132	974.498	837.684	949.338
1622.1967568860505	-0.432433	0.0839559	5.15072	2.59495e-07	4.13237e-06	ENSMUSG00000027309.18	4930402H24Rik	1837.95	2009.12	1740.64	1345.41	1401.54	1398.52
2451.9887053824004	0.40447	0.0786077	-5.14543	2.66915e-07	4.2453e-06	ENSMUSG00000040354.14	Mars1	2123.46	1960.62	2245.27	2739.17	2902.17	2741.25
8563.725132480033	0.350835	0.0682038	-5.14392	2.69071e-07	4.27432e-06	ENSMUSG00000030738.11	Eif3c	7607.25	7055.76	7919.7	9535.73	9709.93	9553.98
11524.472221203005	-0.393831	0.0765962	5.14165	2.7233e-07	4.32076e-06	ENSMUSG00000031447.7	Lamp1	13447	13280.4	12538.6	9358.21	9544.19	10978.5
2761.5708549779197	-0.422144	0.082287	5.13015	2.89517e-07	4.58642e-06	ENSMUSG00000027955.16	Gask1b	3144.33	3424.71	2917.79	2257.21	2341.91	2483.48
892.669410419169	0.612338	0.119365	-5.12997	2.89784e-07	4.58642e-06	ENSMUSG00000089762.3	Ier5l	721.28	795.756	600.153	1199.61	1104.3	934.911
571.0797738210347	-0.551814	0.10763	5.12696	2.9446e-07	4.65471e-06	ENSMUSG00000000552.10	Zfp385a	664.93	725.059	646.467	438.902	455.772	495.349
725.1235824602379	-0.534307	0.104235	5.12597	2.96007e-07	4.67344e-06	ENSMUSG00000062762.17	Ei24	876.243	765.34	931.105	582.433	608.897	586.724
41146.555346066314	-0.421382	0.0822555	5.12285	3.00951e-07	4.74568e-06	ENSMUSG00000025809.15	Itgb1	44971.1	49469.2	46906.5	33809.8	32125.6	39597.1
297.7487401808243	-1.93802	0.378353	5.12226	3.01892e-07	4.75471e-06	ENSMUSG00000021469.9	Msx2	344.674	706.151	365.688	105.004	120.699	144.276
226.21445288629238	-1.01144	0.19752	5.12073	3.04363e-07	4.78778e-06	ENSMUSG00000029121.16	Crmp1	295.838	355.953	258.587	128.422	111.691	206.796
2900.9993115254824	0.453193	0.0885094	-5.12029	3.05071e-07	4.79308e-06	ENSMUSG00000041638.18	Gcn1	2592.1	2624.02	2127.55	3348.04	3478.64	3235.64
77.01749853318876	1.26703	0.247531	-5.11869	3.07669e-07	4.82801e-06	ENSMUSG00000024737.2	Slc15a3	53.5325	34.5266	48.2438	108.781	104.485	112.536
62.75511920848027	-1.52138	0.297334	5.11672	3.10896e-07	4.87272e-06	ENSMUSG00000017652.16	Cd40	82.6467	113.445	84.9091	28.7062	21.6177	45.2066
88.65710571622667	1.17541	0.229732	-5.11642	3.11383e-07	4.87443e-06	ENSMUSG00000027820.12	Mme	56.35	55.9002	52.1033	145.042	108.088	114.459
21540.144050799146	-0.465763	0.0910406	5.11599	3.12104e-07	4.87979e-06	ENSMUSG00000049775.16	Tmsb4x	25731.3	27179.8	22047.4	16225	18160.6	19896.7
435.42334805581817	0.675347	0.132056	-5.11411	3.15223e-07	4.91957e-06	ENSMUSG00000060969.9	Irx1	365.336	285.255	356.039	581.677	554.853	469.379
53.43857213259296	1.50972	0.295214	-5.114	3.15411e-07	4.91957e-06	ENSMUSG00000030862.13	Cpxm2	22.54	27.128	33.7707	86.8739	81.0662	69.2526
666.3482452033438	-0.560795	0.109767	5.10896	3.23931e-07	5.04636e-06	ENSMUSG00000063882.12	Uqcrh	807.684	847.546	734.271	588.476	473.787	546.326
4268.236671729847	0.383573	0.0751256	-5.10576	3.29472e-07	5.12649e-06	ENSMUSG00000032334.10	Loxl1	3945.44	3551.31	3610.57	4741.8	5125.19	4635.12
472.5203199152095	0.62355	0.12218	-5.10352	3.3339e-07	5.1812e-06	ENSMUSG00000021115.15	Vrk1	372.849	325.537	420.686	578.656	531.434	605.961
34.84193450077504	1.97305	0.386975	-5.09866	3.4207e-07	5.30971e-06	ENSMUSG00000039457.4	Ppl	12.2092	15.6192	14.4731	67.9883	61.25	37.5118
1053.2261061303452	-0.587293	0.11523	5.09671	3.4561e-07	5.3582e-06	ENSMUSG00000095115.2	Itpripl2	1193.68	1490.4	1112.5	818.881	772.831	931.063
1622.0600476556324	0.445444	0.0874168	-5.09563	3.47581e-07	5.38229e-06	ENSMUSG00000041057.10	Wdr43	1411.57	1323.52	1389.42	1791.87	1752.83	2063.15
3522.6040085678624	-0.442481	0.086878	5.09314	3.52187e-07	5.44707e-06	ENSMUSG00000024304.14	Cdh2	3701.26	4536.96	3941.52	3007.35	2813.9	3134.64
299.22814803306727	0.689131	0.135316	-5.09276	3.52883e-07	5.4513e-06	ENSMUSG00000021054.6	Sgpp1	242.305	209.626	233.5	364.115	405.331	340.492
1683.6271496223687	0.411607	0.0808906	-5.08844	3.61021e-07	5.57035e-06	ENSMUSG00000032178.14	Ilf3	1505.48	1404.9	1425.12	2008.68	1947.39	1810.19
1211.7815641568368	-0.453175	0.0890715	5.08777	3.62289e-07	5.58324e-06	ENSMUSG00000022074.6	Tnfrsf10b	1425.66	1455.05	1322.85	985.83	980	1101.31
2148.586267309159	0.375534	0.0738235	-5.08691	3.63939e-07	5.60197e-06	ENSMUSG00000066306.13	Numa1	1893.36	1889.1	1827.48	2474.02	2477.02	2330.54
5873.788747871387	0.360967	0.0710163	-5.08288	3.71745e-07	5.71531e-06	ENSMUSG00000040225.15	Prrc2c	5147.57	5061.44	5227.7	6792.78	6117.8	6895.45
460.3378087458427	-0.647807	0.127477	5.08175	3.73968e-07	5.74264e-06	ENSMUSG00000039016.5	Timm8b	566.318	518.721	602.083	318.789	338.677	417.44
356.6733468471802	-0.680499	0.133963	5.07977	3.77898e-07	5.79609e-06	ENSMUSG00000020307.15	Cdc34	420.747	498.17	402.353	296.882	246.802	275.087
383.25445756363337	0.591152	0.116443	-5.07674	3.83965e-07	5.88214e-06	ENSMUSG00000024043.13	Arhgap28	304.29	300.875	312.62	471.385	461.177	449.18
316.32943530926406	-0.834631	0.164536	5.07262	3.92372e-07	6.0038e-06	ENSMUSG00000025283.15	Sat1	450.8	389.657	378.231	191.123	190.956	297.209
1279.4066512439765	0.424174	0.0836305	-5.07201	3.93641e-07	6.01609e-06	ENSMUSG00000020277.10	Pfkl	1109.16	1106.5	1057.5	1430.02	1556.47	1416.79
104.00415069458543	-1.22528	0.241607	5.07135	3.95001e-07	6.0241e-06	ENSMUSG00000032679.12	Cd59a	129.605	182.498	121.574	61.1894	81.0662	48.0921
47.743763217220696	-1.70421	0.336049	5.0713	3.951e-07	6.0241e-06	ENSMUSG00000026141.13	Col19a1	73.255	89.6047	56.9277	28.7062	21.6177	16.3513
293.1409731423594	0.738611	0.145706	-5.06918	3.99531e-07	6.08447e-06	ENSMUSG00000017057.9	Il13ra1	232.913	178.387	247.973	365.626	381.912	352.034
4097.765648026247	0.427837	0.0844555	-5.06583	4.06624e-07	6.18519e-06	ENSMUSG00000050953.10	Gja1	3642.09	3550.49	3299.88	5037.93	4161.4	4894.81
7729.217451869339	-0.421726	0.0832894	5.06338	4.11898e-07	6.25803e-06	ENSMUSG00000007655.16	Cav1	8363.28	8536.29	9663.23	7224.13	6099.78	6488.59
160.8063827057242	-0.941269	0.185925	5.06263	4.13502e-07	6.27073e-06	ENSMUSG00000032796.8	Lama1	188.773	249.907	193.94	96.6944	115.294	120.23
163.64429933227862	0.872544	0.172353	-5.06254	4.13706e-07	6.27073e-06	ENSMUSG00000078521.2	Aunip	114.578	115.089	117.715	194.9	198.162	241.422
831.7197495897855	-0.580579	0.114727	5.06054	4.18061e-07	6.3293e-06	ENSMUSG00000026814.16	Eng	988.943	977.432	1022.77	747.115	711.581	542.479
107.99546160906914	-1.0609	0.20975	5.05793	4.23839e-07	6.40927e-06	ENSMUSG00000029671.15	Wnt16	154.023	158.658	126.399	74.7871	64.853	69.2526
77.47152966912599	-1.25563	0.248412	5.05462	4.31247e-07	6.51365e-06	ENSMUSG00000050541.14	Adra1b	116.457	116.733	92.6281	44.5701	54.0441	40.3974
113.41439755462847	1.06755	0.211349	-5.0511	4.3927e-07	6.62706e-06	ENSMUSG00000022488.9	Nckap1l	63.8634	65.765	89.7335	157.128	169.338	134.658
506.78427083905956	-0.685012	0.135688	5.04845	4.45408e-07	6.71182e-06	ENSMUSG00000042622.14	Maff	611.398	751.365	510.419	371.669	390.919	404.936
190137.69176008698	-0.381501	0.0756037	5.04607	4.50997e-07	6.78811e-06	ENSMUSG00000040152.8	Thbs1	211629	236429	197341	169186	158645	167596
4682.075280605597	-0.402816	0.0798772	5.04294	4.58432e-07	6.89197e-06	ENSMUSG00000051391.9	Ywhag	5298.78	5710.86	4993.23	4291.57	3723.64	4074.36
171.04399312336486	-0.85384	0.169355	5.04172	4.61365e-07	6.92799e-06	ENSMUSG00000019577.6	Pdk4	208.495	239.22	213.238	132.199	122.5	110.612
107.47982227382785	-1.08851	0.215944	5.04073	4.63766e-07	6.95596e-06	ENSMUSG00000020340.16	Cyfip2	141.814	167.701	126.399	63.4557	81.0662	64.4434
61.163682923288164	-1.3705	0.272157	5.03572	4.76068e-07	7.13217e-06	ENSMUSG00000029669.14	Tspan12	92.0384	86.3165	86.8388	31.7279	30.625	39.4355
2730.7797048555544	-0.376122	0.0747168	5.03397	4.8043e-07	7.18084e-06	ENSMUSG00000022174.8	Dad1	3149.97	3193.71	2914.89	2412.83	2278.86	2434.42
2173.2198388881206	-0.415446	0.0825274	5.03404	4.80249e-07	7.18084e-06	ENSMUSG00000035885.5	Cox8a	2437.14	2699.65	2318.6	1907.45	1781.65	1894.83
290.6868655314024	0.695254	0.138196	-5.03094	4.8809e-07	7.2869e-06	ENSMUSG00000018819.10	Lsp1	247.001	196.473	221.921	361.849	378.309	338.568
915.5814867757915	-0.610759	0.121506	5.02657	4.99339e-07	7.44622e-06	ENSMUSG00000041957.15	Pkp2	1121.37	1173.08	1027.59	631.535	652.133	887.78
373.7883709791791	0.667886	0.132891	-5.02581	5.01314e-07	7.46702e-06	ENSMUSG00000015568.16	Lpl	286.446	278.679	298.147	467.608	524.228	387.622
1681.7730182508908	0.450444	0.0897302	-5.01999	5.16753e-07	7.68811e-06	ENSMUSG00000024097.11	Srsf7	1413.45	1318.59	1538.98	2063.07	1778.05	1978.51
130.8002580075239	-1.03404	0.20609	5.01743	5.23681e-07	7.78221e-06	ENSMUSG00000005611.15	Mrvi1	184.077	201.405	138.942	81.5859	100.882	77.9092
385.1747001187055	0.616137	0.122825	-5.01637	5.26567e-07	7.8161e-06	ENSMUSG00000029177.9	Cenpa	324.013	286.9	300.076	475.918	499.008	425.134
816.5082541217339	-0.491432	0.0980132	5.01394	5.33277e-07	7.9066e-06	ENSMUSG00000044477.12	Zfand3	926.958	925.642	1012.15	648.155	650.331	735.809
920.8063231796381	0.517978	0.103319	-5.01339	5.34803e-07	7.92011e-06	ENSMUSG00000039953.13	Clstn1	724.098	754.653	794.093	1203.39	1093.49	955.109
407.34970465309124	0.620823	0.123852	-5.01261	5.36974e-07	7.94314e-06	ENSMUSG00000022369.13	Mtbp	336.222	277.035	350.25	483.472	500.809	496.311
10723.923545484939	0.344148	0.0686985	-5.00954	5.45595e-07	8.06144e-06	ENSMUSG00000032399.8	Rpl4	9299.63	9022.13	10036.6	12236.4	11542	12206.7
899.7821117332292	-0.509763	0.10185	5.00504	5.58498e-07	8.24263e-06	ENSMUSG00000021114.9	Atp6v1d	1036.84	1030.04	1109.61	712.366	670.147	839.688
1055.789252785496	-0.468197	0.0935673	5.00386	5.61944e-07	8.28402e-06	ENSMUSG00000026426.10	Arl8a	1291.35	1201.85	1182.94	820.392	877.316	960.88
119.26495602071707	-1.04178	0.208247	5.00263	5.65528e-07	8.32733e-06	ENSMUSG00000025610.7	Map3k7cl	186.894	147.971	146.661	67.9883	75.6618	90.4132
757.1691730851501	-0.478821	0.0957449	5.00101	5.70316e-07	8.38827e-06	ENSMUSG00000004451.14	Ralb	878.121	864.809	903.124	606.606	616.103	674.251
627.5060499291168	0.497943	0.0995955	-4.99966	5.7432e-07	8.43753e-06	ENSMUSG00000067148.15	Polr1c	514.663	536.806	507.525	702.545	749.412	754.084
491.5871226503212	0.600255	0.120099	-4.998	5.7927e-07	8.50057e-06	ENSMUSG00000026039.9	Sgo2a	372.849	358.419	444.808	636.068	545.846	591.533
416.1228976340702	0.637245	0.127568	-4.99535	5.87289e-07	8.60845e-06	ENSMUSG00000069910.2	Spdl1	332.465	276.213	369.548	492.537	500.809	525.166
1658.4678134417913	0.425746	0.085292	-4.99163	5.98716e-07	8.76598e-06	ENSMUSG00000055491.14	Pprc1	1375.88	1425.46	1440.56	1933.89	2044.67	1730.35
797.3348235440898	-0.512426	0.102667	4.99113	6.0028e-07	8.77892e-06	ENSMUSG00000073664.11	Nbeal1	910.992	993.051	911.808	630.78	603.493	733.886
428.94249604715276	0.569195	0.114047	-4.99088	6.01041e-07	8.78009e-06	ENSMUSG00000017716.15	Birc5	352.188	323.892	359.899	518.222	526.03	493.425
4940.219347674361	0.352754	0.0706835	-4.99061	6.01901e-07	8.78271e-06	ENSMUSG00000025261.18	Huwe1	4379.34	4356.11	4289.84	5695.9	5155.81	5764.32
3002.7904803326733	0.378982	0.075945	-4.99022	6.0311e-07	8.79042e-06	ENSMUSG00000025007.13	Aldh18a1	2694.47	2425.08	2711.3	3419.81	3494.85	3271.23
231.98994328447623	0.711568	0.142748	-4.98477	6.20353e-07	9.03153e-06	ENSMUSG00000032815.16	Fanca	173.746	174.277	180.432	284.04	277.427	302.018
22812.774352432592	-0.400532	0.0803702	4.9836	6.24136e-07	9.07636e-06	ENSMUSG00000029761.16	Cald1	26369.9	27029.4	24489.5	20068.6	17549.9	21369.2
743.7719473261504	0.515246	0.103466	-4.97985	6.36343e-07	9.24345e-06	ENSMUSG00000031012.17	Cask	585.101	571.333	680.238	897.445	906.14	822.375
303.3007724203666	-0.839129	0.168514	4.97958	6.37222e-07	9.24581e-06	ENSMUSG00000047139.9	Cd24a	420.747	422.54	328.058	200.188	169.338	278.934
490.4086821233867	-0.583836	0.117326	4.97619	6.48467e-07	9.3984e-06	ENSMUSG00000039844.20	Rapgef1	584.162	600.927	586.645	406.419	331.471	432.829
554.3390585159734	0.532799	0.10709	-4.97523	6.51718e-07	9.43492e-06	ENSMUSG00000037461.10	Ints7	433.895	430.76	494.981	638.334	655.736	672.328
5744.6380325134905	0.361989	0.0728329	-4.97013	6.6907e-07	9.67526e-06	ENSMUSG00000004980.16	Hnrnpa2b1	5219.89	4783.58	5087.79	6748.21	6034.93	6593.43
844.8098955999087	-0.535597	0.107789	4.96894	6.73204e-07	9.72414e-06	ENSMUSG00000034341.17	Wbp2	1012.42	1124.58	860.669	683.66	700.772	686.755
316.46155661785707	0.675433	0.135998	-4.96651	6.81684e-07	9.83562e-06	ENSMUSG00000000028.15	Cdc45	220.704	246.619	263.411	353.539	385.515	428.982
5156.349179958862	0.495422	0.0997785	-4.96522	6.86233e-07	9.89019e-06	ENSMUSG00000046186.8	Cd109	4213.1	3659.82	4970.08	6545	5851.18	5698.92
636.2141253917678	0.550903	0.110995	-4.96332	6.92984e-07	9.97634e-06	ENSMUSG00000027654.2	Fam83d	529.69	531.874	484.368	795.463	816.066	659.824
525.5680505099479	-0.566219	0.114107	4.96219	6.9702e-07	1.00233e-05	ENSMUSG00000024014.8	Pim1	617.972	692.176	569.277	403.397	437.757	432.829
1339.8172457590686	0.423927	0.0854463	-4.96132	7.00146e-07	1.0057e-05	ENSMUSG00000004897.16	Hdgf	1235.94	1122.94	1073.91	1512.36	1538.46	1555.3
1162.651243343764	-0.419592	0.0847206	4.95265	7.321e-07	1.05043e-05	ENSMUSG00000009035.15	Tmem184b	1301.69	1370.38	1322.85	991.873	949.375	1039.75
573.5589847270651	0.517081	0.104433	-4.95134	7.37042e-07	1.05635e-05	ENSMUSG00000002835.9	Chaf1a	459.253	463.643	493.052	707.833	682.758	634.816
1101.375556486193	0.477938	0.0965733	-4.94896	7.46094e-07	1.06813e-05	ENSMUSG00000071054.12	Safb	898.783	1004.56	861.634	1395.27	1203.38	1244.62
614.4747071419943	0.604286	0.122313	-4.9405	7.79236e-07	1.11311e-05	ENSMUSG00000032812.18	Arap1	501.515	438.159	521.998	797.729	807.059	620.388
317.34700363154997	0.6594	0.133463	-4.9407	7.78419e-07	1.11311e-05	ENSMUSG00000063450.14	Syne2	257.332	267.17	212.273	377.713	398.125	391.47
499.5400248890274	-0.685185	0.138874	4.93385	8.06255e-07	1.15043e-05	ENSMUSG00000021662.11	Arhgef28	588.858	750.543	507.525	360.338	378.309	411.668
536.1444788912337	1.45794	0.295699	-4.93048	8.20295e-07	1.16788e-05	ENSMUSG00000027996.13	Sfrp2	313.682	242.508	302.971	1061.37	754.816	541.517
615.198919532319	0.656409	0.133127	-4.93068	8.19437e-07	1.16788e-05	ENSMUSG00000069267.2	H3c2	497.758	464.465	475.684	937.482	652.133	663.671
3778.754431858846	0.326846	0.0662979	-4.92996	8.22465e-07	1.16968e-05	ENSMUSG00000028790.13	Khdrbs1	3406.36	3380.32	3269.96	4203.94	4229.85	4182.09
1663.0693244131755	0.527513	0.107021	-4.92905	8.26315e-07	1.17386e-05	ENSMUSG00000069300.3	H2bc11	1370.24	1164.04	1557.31	2177.13	1873.53	1836.16
395.56976653252696	0.621071	0.126022	-4.92826	8.29655e-07	1.17731e-05	ENSMUSG00000023505.13	Cdca3	315.56	271.28	350.25	495.559	466.581	474.188
402.41057283429984	-0.637363	0.129355	4.92724	8.34e-07	1.18217e-05	ENSMUSG00000109901.2	Chmp1b	500.576	542.561	430.335	333.898	281.03	326.065
176.1643721118355	0.804707	0.163354	-4.92616	8.38598e-07	1.18738e-05	ENSMUSG00000057110.15	Cntrl	137.118	122.487	125.434	237.203	226.985	207.758
208.20001356620594	0.88987	0.180691	-4.92482	8.44391e-07	1.19428e-05	ENSMUSG00000036896.5	C1qc	151.206	129.886	153.415	251.557	347.684	215.453
839.1045088259382	-0.455815	0.0925975	4.92254	8.54278e-07	1.20694e-05	ENSMUSG00000029101.16	Rgs12	946.68	936.328	1028.56	695.746	709.78	717.534
2284.5532230285985	0.359861	0.0731306	-4.9208	8.6191e-07	1.21639e-05	ENSMUSG00000024120.12	Lrpprc	2034.24	1957.33	2014.66	2544.27	2489.63	2667.19
1920.1745665081685	-0.359519	0.0731702	4.91346	8.94819e-07	1.26145e-05	ENSMUSG00000019173.11	Rab5c	2135.67	2145.58	2193.16	1673.27	1684.38	1688.99
458.15676303951307	-0.59824	0.121859	4.90928	9.14096e-07	1.28722e-05	ENSMUSG00000002504.15	Slc9a3r2	556.926	573.799	520.068	374.691	408.934	314.522
47.82008115013434	-1.56344	0.318629	4.90676	9.25922e-07	1.30245e-05	ENSMUSG00000020836.15	Coro6	70.4375	78.9179	65.6116	20.3965	19.8162	31.7408
1376.1025869336506	0.41591	0.0848486	-4.90178	9.497e-07	1.33444e-05	ENSMUSG00000030655.15	Smg1	1126.06	1162.4	1244.69	1499.52	1660.96	1562.99
1278.0498094704722	0.425722	0.0868812	-4.90005	9.58109e-07	1.34479e-05	ENSMUSG00000031565.18	Fgfr1	1121.37	1044.02	1104.78	1359.77	1504.23	1534.14
787.7516111265769	-0.491075	0.100339	4.89417	9.8719e-07	1.3841e-05	ENSMUSG00000078453.3	Abracl	951.376	854.122	961.981	665.529	598.088	695.412
18819.933724871807	0.350584	0.0716753	-4.89127	1.00186e-06	1.40314e-05	ENSMUSG00000037742.14	Eef1a1	16666.5	16506.2	16452.1	20893.5	22876.9	19524.4
1659.9955800560097	0.450096	0.0921238	-4.88577	1.03025e-06	1.44134e-05	ENSMUSG00000025995.16	Wdr75	1397.48	1268.44	1547.66	1890.07	1810.48	2045.84
683.8259957969915	0.489166	0.100202	-4.8818	1.05124e-06	1.46912e-05	ENSMUSG00000027185.15	Nat10	611.398	535.162	561.558	827.19	796.25	771.397
1192.9019784887107	-0.411467	0.0843063	4.88062	1.05752e-06	1.47629e-05	ENSMUSG00000059534.8	Uqcr10	1374	1367.09	1341.18	967.699	1048.46	1058.99
2031.2602853278731	0.601891	0.123359	-4.87919	1.06521e-06	1.48543e-05	ENSMUSG00000060678.5	H4c3	1884.91	1268.44	1693.36	2778.45	2163.57	2398.83
870.7908493153483	0.454109	0.0931114	-4.87705	1.07682e-06	1.49999e-05	ENSMUSG00000015749.12	Anp32e	702.497	725.881	778.655	1057.6	980	980.117
2980.98212257849	0.354674	0.0727421	-4.87577	1.08383e-06	1.50813e-05	ENSMUSG00000014355.10	Anapc1	2571.44	2501.53	2776.91	3348.04	3356.14	3331.82
1264.4221817100824	0.470743	0.0965684	-4.87471	1.08966e-06	1.5146e-05	ENSMUSG00000025402.12	Nab2	1171.14	1006.2	999.612	1498.01	1572.68	1338.88
166.69982324367984	-0.850862	0.174637	4.87219	1.1037e-06	1.53247e-05	ENSMUSG00000021367.8	Edn1	190.651	243.33	207.448	112.558	127.904	118.307
618.555431885678	0.645036	0.13248	-4.86893	1.12206e-06	1.55629e-05	ENSMUSG00000022322.8	Shcbp1	447.043	406.099	598.223	798.484	688.162	773.321
779.1167537643889	-0.48912	0.100463	4.86865	1.12365e-06	1.55682e-05	ENSMUSG00000030352.15	Tspan9	885.634	943.727	906.019	646.644	581.875	710.801
1690.1782658789537	0.398911	0.0819825	-4.8658	1.13993e-06	1.57768e-05	ENSMUSG00000030541.16	Idh2	1547.75	1344.89	1483.01	1933.13	1909.56	1922.72
626.7293538013874	0.500992	0.103021	-4.86302	1.15607e-06	1.5983e-05	ENSMUSG00000053801.18	Grwd1	512.785	537.628	503.665	746.36	781.838	678.099
274.57044137870787	-0.69885	0.143778	4.86061	1.17025e-06	1.61618e-05	ENSMUSG00000046818.7	Ddit4l	360.64	310.739	353.145	228.138	178.346	216.414
380.96459731936807	-0.617351	0.127022	4.86018	1.17281e-06	1.61798e-05	ENSMUSG00000055839.6	Elob	431.078	486.661	470.86	335.409	268.419	293.362
520.1660493043702	-0.545526	0.11227	4.85906	1.17946e-06	1.62368e-05	ENSMUSG00000019189.13	Rnf145	583.223	649.429	613.661	387.533	462.978	424.172
3549.994086153646	0.382393	0.0786958	-4.85913	1.17905e-06	1.62368e-05	ENSMUSG00000025364.13	Pa2g4	3075.77	2875.57	3292.16	3768.06	4179.41	4108.99
552.5239569614438	0.523497	0.107764	-4.85781	1.18693e-06	1.63055e-05	ENSMUSG00000032409.15	Atr	441.408	422.54	497.876	662.508	637.721	653.091
1874.9150652018884	0.507011	0.10437	-4.8578	1.18698e-06	1.63055e-05	ENSMUSG00000075031.4	H2bc3	1444.44	1357.22	1845.81	2254.19	2235.63	2112.21
471.09401550665	0.572378	0.117833	-4.85752	1.18865e-06	1.63111e-05	ENSMUSG00000026134.11	Prim2	398.207	328.825	410.072	560.525	571.066	557.868
801.4701890332444	0.57555	0.118511	-4.8565	1.19479e-06	1.63779e-05	ENSMUSG00000069516.8	Lyz2	677.139	561.468	693.746	1074.21	981.802	820.451
1047.2698203594528	0.492972	0.101523	-4.85579	1.1991e-06	1.64196e-05	ENSMUSG00000024943.9	Smc5	803.927	833.571	975.49	1180.73	1152.94	1336.96
1498.9176048464562	-0.565284	0.11648	4.85305	1.21578e-06	1.66303e-05	ENSMUSG00000060126.14	Tpt1	1853.92	1838.13	1684.67	1487.43	1023.24	1106.12
354.2005303973817	-0.671133	0.138468	4.84686	1.2543e-06	1.71391e-05	ENSMUSG00000037419.9	Endod1	432.956	461.177	403.318	239.47	331.471	256.812
174.1774886571317	1.03751	0.214134	-4.84512	1.26534e-06	1.72715e-05	ENSMUSG00000031380.10	Vegfd	110.822	81.3841	150.521	266.665	255.809	179.864
560.9365863906121	-0.600813	0.124034	4.84395	1.27283e-06	1.73554e-05	ENSMUSG00000071180.5	Smim15	694.044	676.557	660.94	401.886	394.522	537.67
1720.7109549107545	0.453607	0.0937152	-4.84027	1.29662e-06	1.76611e-05	ENSMUSG00000041133.11	Smc1a	1468.86	1353.94	1542.84	2105.37	1742.02	2111.24
1806.1330340519985	-0.387572	0.0800839	4.83957	1.30121e-06	1.77049e-05	ENSMUSG00000076441.9	Ass1	2046.44	2076.53	2022.38	1518.4	1489.82	1683.22
765.217836819972	-0.46615	0.0964083	4.83517	1.33033e-06	1.80821e-05	ENSMUSG00000002379.7	Ndufa11	914.749	911.667	833.653	613.405	664.743	653.091
390.10493758508625	0.614938	0.127212	-4.83395	1.33849e-06	1.81614e-05	ENSMUSG00000016181.9	Utp25	308.047	274.569	339.636	442.679	518.824	456.875
1154.0454490943239	-0.597095	0.123523	4.83388	1.33898e-06	1.81614e-05	ENSMUSG00000015575.15	Atp6v0e	1309.2	1667.96	1182.94	833.234	1055.66	875.276
492.37138822905763	0.535118	0.11071	-4.83351	1.34148e-06	1.81762e-05	ENSMUSG00000037266.18	Rsrp1	426.382	406.921	374.372	613.405	565.662	567.487
870.2325022516883	-0.481371	0.0996481	4.83071	1.36049e-06	1.84144e-05	ENSMUSG00000019960.8	Dusp6	1026.51	975.787	1048.82	770.534	634.118	765.626
506.4370195097434	-0.535298	0.110861	4.82854	1.37539e-06	1.85966e-05	ENSMUSG00000019433.9	Gipc1	595.432	628.055	569.277	390.555	450.368	404.936
[truncated: 11,945 more rows]

## Sheet: DE_RPF_Pelo_MEFs
baseMean	log2FoldChange	lfcSE	stat	pvalue	padj	gene_id	external_gene_name	Cre_control_fibro_Pelo_batch_1	Cre_control_fibro_Pelo_batch_2	Cre_control_fibro_Pelo_batch_3	Pelo_fibro_1	Pelo_fibro_2	Pelo_fibro_3
[truncated: 14,357 more rows]

[truncated: 1 more sheets: DE_RPF_Upf2_MEFs]
