# Supplementary material for: Defects in translation-dependent quality control pathways lead to convergent molecular and neurodevelopmental pathology
Source: eLife. 2021 Apr 26;10:e66904. doi: 10.7554/eLife.66904 (PMC8075583; doi:10.7554/eLife.66904)
Supplement: Supplementary file 4. [file elife-66904-supp4.xlsx]

## Sheet: Hbs1l cerebellum
codon	J_cerebellum_1	J_cerebellum_2	J_cerebellum_3	Hbs1l_cerebellum_1	Hbs1l_cerebellum_2	Hbs1l_cerebellum_3	p_val	p_adj
AAA	0.908162	0.933085	0.982137	1.03679	0.910512	1.0308	0.347607	0.717936
AAC	1.19594	1.19244	1.15634	1.17562	1.08873	1.16639	0.304439	0.717936
AAG	1.31536	1.30403	1.30439	1.24331	1.27212	1.28578	0.0721204	0.717936
AAT	1.17675	1.16999	1.12807	1.15376	1.0731	1.13093	0.253898	0.717936
ACA	0.981786	0.990195	1.02636	1.00112	0.962631	1.03667	0.97973	0.99174
ACC	0.99635	0.986254	1.08895	1.03626	1.00774	1.09056	0.635287	0.842047
ACG	0.793488	0.803922	0.871635	0.846787	0.826863	0.830937	0.680468	0.842047
ACT	0.923931	0.917695	0.989986	0.967414	0.9254	0.979702	0.65851	0.842047
AGA	0.923545	0.93953	0.950651	0.949285	0.90531	0.96791	0.894731	0.974618
AGC	0.79459	0.801115	0.841203	0.827254	0.825766	0.814805	0.557283	0.829128
AGG	0.913343	0.919433	0.913254	0.880241	0.934414	0.876227	0.430737	0.717936
AGT	0.764994	0.791296	0.823326	0.845832	0.797625	0.788526	0.515753	0.786524
ATA	1.44187	1.42826	1.34548	1.35002	1.31462	1.43357	0.447384	0.718169
ATC	1.26814	1.23959	1.27557	1.20909	1.25475	1.31789	0.98868	0.99174
ATG	1.01807	1.02758	0.995369	1.00421	1.00975	0.94125	0.325854	0.717936
ATT	1.35736	1.32352	1.31249	1.28082	1.31864	1.31902	0.249138	0.717936
CAA	0.798177	0.82733	0.914813	0.928119	0.835684	0.943497	0.316042	0.717936
CAC	0.907534	0.925394	0.984801	0.970017	0.928312	1.02328	0.392699	0.717936
CAG	0.79777	0.817554	0.853567	0.85598	0.832541	0.848253	0.300854	0.717936
CAT	0.922825	0.940091	0.964585	1.01411	0.917316	1.0145	0.348769	0.717936
CCA	1.14561	1.12965	1.21714	1.13418	1.17776	1.23018	0.690203	0.842047
CCC	0.994665	0.965174	1.06599	0.93927	1.04175	1.02136	0.865641	0.966634
CCG	0.979064	0.96489	1.01772	0.968815	1.06454	0.982952	0.626584	0.842047
CCT	1.07216	1.05881	1.1165	1.05043	1.10776	1.1281	0.680851	0.842047
CGA	0.942247	0.924981	1.00706	0.949715	0.993694	0.999441	0.489449	0.765549
CGC	0.818497	0.820704	0.893038	0.856639	0.916782	0.901689	0.198725	0.717936
CGG	0.838463	0.824719	0.824752	0.798909	0.889033	0.795077	0.962525	0.99174
CGT	0.747081	0.762098	0.847486	0.824627	0.814981	0.810713	0.423556	0.717936
CTA	0.956208	0.965167	1.0251	1.0556	0.963308	1.08086	0.30141	0.717936
CTC	0.817771	0.815786	0.891925	0.894339	0.855639	0.914323	0.211564	0.717936
CTG	0.849006	0.859521	0.865996	0.88361	0.871676	0.859474	0.19925	0.717936
CTT	0.901685	0.899696	0.958546	0.993978	0.91291	0.993438	0.237603	0.717936
GAA	1.20986	1.2018	1.16574	1.1425	1.21304	1.15346	0.43547	0.717936
GAC	1.50782	1.47254	1.35862	1.35235	1.38848	1.35094	0.202973	0.717936
GAG	1.17879	1.163	1.03336	1.02975	1.11103	1.00843	0.256508	0.717936
GAT	1.48777	1.46758	1.29634	1.32754	1.34497	1.2367	0.195026	0.717936
GCA	0.948114	0.956481	0.942975	0.940117	0.997417	0.97373	0.328949	0.717936
GCC	0.884979	0.887633	0.907974	0.881002	0.948301	0.869813	0.828587	0.953657
GCG	0.811981	0.822858	0.801573	0.804117	0.903479	0.777188	0.716947	0.857525
GCT	0.818839	0.82834	0.860094	0.870687	0.888914	0.83488	0.227069	0.717936
GGA	1.35713	1.32166	1.21629	1.184	1.31778	1.1663	0.302387	0.717936
GGC	0.816243	0.819757	0.825222	0.8397	0.893118	0.823858	0.267199	0.717936
GGG	0.906744	0.898585	0.80544	0.831301	0.969316	0.795872	0.943286	0.99174
GGT	0.761128	0.776255	0.73346	0.762504	0.804496	0.683687	0.871556	0.966634
GTA	0.978911	0.993892	0.993112	1.0363	0.993817	1.03712	0.130857	0.717936
GTC	0.932602	0.925181	0.955754	0.987196	0.958425	0.978917	0.0424795	0.717936
GTG	0.821729	0.831315	0.814788	0.83493	0.864892	0.769012	0.99174	0.99174
GTT	0.927991	0.914299	0.928177	0.958353	0.938454	0.940259	0.052723	0.717936
TAC	0.977057	0.999387	1.0067	1.06742	0.967273	1.05472	0.378557	0.717936
TAT	0.969954	0.972425	0.960266	1.01201	0.914053	1.01035	0.761966	0.893845
TCA	0.878055	0.894869	0.939378	0.955218	0.883902	0.978891	0.366772	0.717936
TCC	0.881005	0.879596	0.935087	0.939225	0.886032	0.942549	0.405264	0.717936
TCG	0.878904	0.886763	0.884867	0.91132	0.896344	0.880118	0.300365	0.717936
TCT	0.836371	0.845723	0.877239	0.909852	0.841766	0.889004	0.327424	0.717936
TGC	0.789017	0.811722	0.821762	0.821891	0.838187	0.80135	0.418943	0.717936
TGG	1.08204	1.083	1.01323	1.04307	1.07911	1.00881	0.63577	0.842047
TGT	0.768746	0.787124	0.783264	0.815468	0.792717	0.759292	0.629462	0.842047
TTA	0.948213	0.964521	1.01087	1.0863	0.952591	1.11848	0.26123	0.717936
TTC	0.783786	0.808234	0.843291	0.867015	0.814248	0.88361	0.189016	0.717936
TTG	0.898342	0.901639	0.908095	0.971075	0.887127	0.898287	0.602942	0.842047
TTT	0.846822	0.859394	0.856294	0.924789	0.848985	0.918201	0.214846	0.717936
