# Supplementary material for: Defects in translation-dependent quality control pathways lead to convergent molecular and neurodevelopmental pathology
Source: eLife. 2021 Apr 26;10:e66904. doi: 10.7554/eLife.66904 (PMC8075583; doi:10.7554/eLife.66904)
Supplement: Supplementary file 5. [file elife-66904-supp5.xlsx]

## Sheet: Hbs1l MEFs
ensembl_transcript_id	ensembl_gene_id	external_gene_name	transcript_biotype	coordinate	region	P_codon	A_codon	relative_start	relative_end	chrom	spliced_start	spliced_end	strand	genome_index	Cre_control_fibro_Hbs1l_batch_1	Cre_control_fibro_Hbs1l_batch_2	Cre_control_fibro_Hbs1l_batch_3	Hbs1l_fibro_1	Hbs1l_fibro_2	Hbs1l_fibro_3	Hbs1l_pause_sum	Control_pause_sum	Hbs1l_pause_count	Control_pause_count	other_transcript_start_stop	pause_difference	unique_NMD_locus	unique_genome_indicies
ENSMUST00000172186	ENSMUSG00000018379	Srsf1	nonsense_mediated_decay	93	cds	TCC	GAG	31	-26	chr11	88049049	88049051	+	6236	NA	NA	NA	22.1418	12.1333	19.8579	54.133	0	3	0	FALSE	3	TRUE	TRUE
ENSMUST00000184297	ENSMUSG00000024095	Hnrnpll	nonsense_mediated_decay	2017	3utr	NA	NA	1781	786	chr17	80032562	80032560	-	15734	NA	NA	NA	12.1333	10.9109	13.6885	36.7327	0	3	0	FALSE	3	TRUE	TRUE
ENSMUST00000144429	ENSMUSG00000031328	Flna	nonsense_mediated_decay	1233	cds	AGG	ACA	411	-99	chrX	74241261	74241259	-	36281	NA	NA	NA	12.8241	11.6241	11.0163	35.4645	0	3	0	FALSE	3	TRUE	TRUE
ENSMUST00000128230	ENSMUSG00000038335	Tsr1	nonsense_mediated_decay	917	3utr	NA	NA	911	639	chr11	74901588	74901590	+	5786	NA	NA	NA	11.2783	11.5033	10.9333	33.715	0	3	0	FALSE	3	TRUE	TRUE
ENSMUST00000188664	ENSMUSG00000032548	Slco2a1	nonsense_mediated_decay	121	cds	ATG	GGG	0	-414	chr9	103008619	103008621	+	34873	NA	NA	NA	15.0281	18.3943	12.4577	45.8801	0	3	0	TRUE	3	TRUE	TRUE
ENSMUST00000174266	ENSMUSG00000037470	Uggt1	nonsense_mediated_decay	4342	3utr	NA	NA	4307	3510	chr1	36150065	36150063	-	163	NA	NA	NA	10.6885	11.1348	10.9831	32.8063	0	3	0	FALSE	3	TRUE	TRUE
ENSMUST00000150815	ENSMUSG00000047215	Rpl9	nonsense_mediated_decay	159	cds	ATG	TTC	53	-13	chr5	65390742	65390740	-	25174	NA	NA	NA	11.6605	22.788	19.8286	54.2772	0	3	0	FALSE	3	TRUE	TRUE
ENSMUST00000127298	ENSMUSG00000030890	Ilk	nonsense_mediated_decay	295	3utr	NA	NA	294	242	chr7	105741163	105741165	+	30257	NA	NA	NA	10.4165	11.8592	10.6521	32.9277	0	3	0	FALSE	3	TRUE	TRUE
ENSMUST00000177376	ENSMUSG00000025613	Cct8	nonsense_mediated_decay	953	3utr	NA	NA	952	737	chr16	87486496	87486494	-	14083	NA	NA	NA	10.3137	21.852	21.4287	53.5943	0	3	0	FALSE	3	TRUE	TRUE
ENSMUST00000113397	ENSMUSG00000044627	Swi5	nonsense_mediated_decay	225	3utr	NA	NA	166	38	chr2	32280748	32280746	-	18720	NA	NA	NA	10.8062	14.5045	10.1512	35.4619	0	3	0	FALSE	3	TRUE	TRUE
ENSMUST00000057037	ENSMUSG00000057335	Cep170	protein_coding	3988	cds	ATT	AAA	1274	-304	chr1	176749985	176749983	-	2162	NA	NA	NA	18.6362	18.1491	29.9414	66.7266	0	3	0	FALSE	3	FALSE	FALSE
ENSMUST00000065629	ENSMUSG00000021585	Cast	protein_coding	838	cds	CCA	GAG	248	-505	chr13	74738224	74738222	-	9846	NA	NA	NA	36.6054	25.8458	30.9501	93.4014	0	3	0	FALSE	3	FALSE	FALSE
ENSMUST00000001547	ENSMUSG00000001506	Col1a1	protein_coding	3721	cds	CCA	CCT	1192	-261	chr11	94950368	94950370	+	6422	NA	NA	NA	13.1292	14.3683	17.2012	44.6987	0	3	0	FALSE	3	FALSE	TRUE
ENSMUST00000094280	ENSMUSG00000070493	Chchd2	protein_coding	385	cds	CTG	ATG	54	-99	chr5	129884072	129884070	-	26009	NA	NA	NA	11.6803	13.9516	19.2574	44.8893	0	3	0	FALSE	3	FALSE	TRUE
ENSMUST00000028921	ENSMUSG00000027433	Xrn2	protein_coding	567	cds	CCA	GAA	147	-804	chr2	147026394	147026396	+	20178	NA	NA	NA	31.6958	14.1567	31.7436	77.5962	0	3	0	FALSE	3	FALSE	FALSE
ENSMUST00000024599	ENSMUSG00000023830	Igf2r	protein_coding	2696	cds	GGC	AGC	855	-1628	chr17	12714069	12714067	-	14289	NA	NA	NA	10.6427	12.4516	15.2257	38.3199	0	3	0	FALSE	3	FALSE	TRUE
ENSMUST00000089302	ENSMUSG00000031010	Usp9x	protein_coding	2751	cds	CTC	CTT	790	-1763	chrX	13124612	13124614	+	35761	NA	NA	NA	12.0364	10.3923	13.4939	35.9227	0	3	0	FALSE	3	FALSE	FALSE
ENSMUST00000138742	ENSMUSG00000031807	Pgls	protein_coding	384	cds	AGG	AGA	128	-59	chr8	71594676	71594678	+	32049	NA	NA	NA	10.0965	21.2635	12.7333	44.0933	0	3	0	FALSE	3	FALSE	TRUE
ENSMUST00000039559	ENSMUSG00000040152	Thbs1	protein_coding	1440	cds	CGT	TCC	404	-767	chr2	118117572	118117574	+	19627	NA	NA	NA	10.7486	11.1346	10.9853	32.8684	0	3	0	FALSE	3	FALSE	TRUE
ENSMUST00000039559	ENSMUSG00000040152	Thbs1	protein_coding	2124	cds	CGA	GGT	632	-539	chr2	118119441	118119443	+	19657	NA	NA	NA	16.115	22.6798	27.1452	65.94	0	3	0	FALSE	3	FALSE	TRUE
ENSMUST00000023117	ENSMUSG00000061360	Phf5a	protein_coding	47	cds	ATG	GCT	0	-110	chr15	81871865	81871863	-	12393	NA	NA	NA	10.5667	12.0208	21.0634	43.6509	0	3	0	TRUE	3	FALSE	TRUE
ENSMUST00000030547	ENSMUSG00000028763	Hspg2	protein_coding	6984	cds	GCA	GAT	2297	-2078	chr4	137542550	137542552	+	24206	NA	NA	NA	11.2033	19.2429	12.1833	42.6295	0	3	0	FALSE	3	FALSE	FALSE
ENSMUST00000171332	ENSMUSG00000028763	Hspg2	protein_coding	6968	cds	GCA	GAT	2303	-2080	chr4	137542550	137542552	+	24206	NA	NA	NA	11.2129	19.2558	12.1885	42.6572	0	3	0	FALSE	3	FALSE	FALSE
ENSMUST00000020238	ENSMUSG00000020048	Hsp90b1	protein_coding	1285	cds	GAA	GGG	377	-425	chr10	86695925	86695923	-	3510	NA	NA	NA	13.5412	10.788	10.4684	34.7975	0	3	0	FALSE	3	FALSE	FALSE
ENSMUST00000129413	ENSMUSG00000020048	Hsp90b1	protein_coding	159	cds	GAA	GGG	53	-319	chr10	86695925	86695923	-	3510	NA	NA	NA	13.5412	10.9549	10.4684	34.9645	0	3	0	FALSE	3	FALSE	FALSE
ENSMUST00000150576	ENSMUSG00000048758	Rpl29	protein_coding	239	cds	CCC	AAG	36	-124	chr9	106431074	106431076	+	34934	NA	NA	NA	15.3792	14.1356	25.8111	55.326	0	3	0	FALSE	3	FALSE	FALSE
ENSMUST00000150576	ENSMUSG00000048758	Rpl29	protein_coding	512	cds	GGG	GCC	127	-33	chr9	106431347	106431349	+	34942	NA	NA	NA	10.8653	17.1281	21.9193	49.9127	0	3	0	FALSE	3	FALSE	FALSE
ENSMUST00000098994	ENSMUSG00000048758	Rpl29	protein_coding	422	cds	GGG	GCC	127	-33	chr9	7752093	7752095	+	33129	NA	NA	NA	10.8653	17.1281	21.9193	49.9127	0	3	0	FALSE	3	FALSE	TRUE
ENSMUST00000059802	ENSMUSG00000048758	Rpl29	protein_coding	490	cds	GGG	GCC	127	-33	chr9	106431347	106431349	+	34942	NA	NA	NA	10.8653	17.1281	21.9193	49.9127	0	3	0	FALSE	3	FALSE	FALSE
ENSMUST00000080861	ENSMUSG00000062997	Rpl35	protein_coding	769	cds	TAC	AAG	77	-46	chr2	39001757	39001755	-	18968	NA	NA	NA	10.8096	10.5723	12.6009	33.9828	0	3	0	FALSE	3	FALSE	TRUE
ENSMUST00000002073	ENSMUSG00000002020	Ltbp2	protein_coding	1549	cds	CCG	CAG	416	-1393	chr12	84830122	84830120	-	8295	NA	NA	NA	15.7329	23.4231	20.8273	59.9833	0	3	0	FALSE	3	FALSE	FALSE
ENSMUST00000163189	ENSMUSG00000002020	Ltbp2	protein_coding	1496	cds	CCG	CAG	416	-1350	chr12	84830122	84830120	-	8295	NA	NA	NA	15.7329	23.4231	20.8273	59.9833	0	3	0	FALSE	3	FALSE	FALSE
ENSMUST00000110254	ENSMUSG00000002020	Ltbp2	protein_coding	1512	cds	CCG	CAG	436	-1350	chr12	84830122	84830120	-	8295	NA	NA	NA	15.7329	23.4231	20.8273	59.9833	0	3	0	FALSE	3	FALSE	FALSE
ENSMUST00000188894	ENSMUSG00000026193	Fn1	protein_coding	2806	cds	GTT	CAG	872	-1514	chr1	71627257	71627255	-	868	NA	NA	NA	20.3045	35.1686	26.6878	82.161	0	3	0	FALSE	3	FALSE	FALSE
ENSMUST00000188674	ENSMUSG00000026193	Fn1	protein_coding	2806	cds	GTT	CAG	872	-1394	chr1	71627257	71627255	-	868	NA	NA	NA	18.9755	35.9651	26.1334	81.0741	0	3	0	FALSE	3	FALSE	FALSE
ENSMUST00000026328	ENSMUSG00000025289	Prdx4	protein_coding	699	cds	GGA	CAT	198	-76	chrX	155330317	155330315	-	36924	NA	NA	NA	13.64	13.2182	20.4942	47.3524	0	3	0	FALSE	3	FALSE	FALSE
ENSMUST00000130349	ENSMUSG00000025289	Prdx4	protein_coding	790	cds	GGA	CAT	181	-47	chrX	155330317	155330315	-	36924	NA	NA	NA	13.64	13.2182	20.4942	47.3524	0	3	0	FALSE	3	FALSE	FALSE
ENSMUST00000102638	ENSMUSG00000027889	Ampd2	protein_coding	1108	cds	GGG	GAC	236	-562	chr3	108079259	108079257	-	22129	NA	NA	NA	12.5078	10.6534	19.5994	42.7606	0	3	0	FALSE	3	FALSE	FALSE
ENSMUST00000102637	ENSMUSG00000027889	Ampd2	protein_coding	1046	cds	GGG	GAC	236	-562	chr3	108079259	108079257	-	22129	NA	NA	NA	12.5078	10.6534	19.5994	42.7606	0	3	0	FALSE	3	FALSE	FALSE
ENSMUST00000078912	ENSMUSG00000027889	Ampd2	protein_coding	851	cds	GGG	GAC	262	-562	chr3	108079259	108079257	-	22129	NA	NA	NA	12.5078	10.6534	19.5994	42.7606	0	3	0	FALSE	3	FALSE	FALSE
ENSMUST00000072232	ENSMUSG00000058587	Tmod3	protein_coding	592	cds	TGC	GAC	131	-221	chr9	75516486	75516484	-	34441	NA	NA	NA	12.7167	11.1026	14.3108	38.1301	0	3	0	FALSE	3	FALSE	FALSE
ENSMUST00000161769	ENSMUSG00000039630	Hnrnpu	nonsense_mediated_decay	2482	cds	GGC	TAC	775	-18	chr1	178329892	178329890	-	2192	NA	NA	NA	12.9617	20.8273	21.5372	55.3263	0	3	0	FALSE	3	FALSE	FALSE
ENSMUST00000166478	ENSMUSG00000031422	Morf4l2	protein_coding	396	cds	CCT	TCC	67	-221	chrX	136734277	136734275	-	36820	NA	NA	NA	16.2965	10.7406	12.3401	39.3772	0	3	0	FALSE	3	FALSE	FALSE
ENSMUST00000034051	ENSMUSG00000031634	Ufsp2	protein_coding	1071	cds	GGC	GAC	329	-132	chr8	45992122	45992124	+	31785	NA	NA	NA	23.345	16.1874	24.513	64.0455	0	3	0	FALSE	3	FALSE	FALSE
ENSMUST00000191899	ENSMUSG00000039952	Dag1	protein_coding	1351	cds	CCA	TCG	331	-561	chr9	108208945	108208943	-	35018	NA	NA	NA	38.7015	17.3523	31.0562	87.1101	0	3	0	FALSE	3	FALSE	FALSE
ENSMUST00000080435	ENSMUSG00000039952	Dag1	protein_coding	1363	cds	CCA	TCG	331	-561	chr9	108208945	108208943	-	35018	NA	NA	NA	38.7015	17.3648	31.0562	87.1225	0	3	0	FALSE	3	FALSE	FALSE
ENSMUST00000166905	ENSMUSG00000039952	Dag1	protein_coding	1254	cds	CCA	TCG	331	-561	chr9	108208945	108208943	-	35018	NA	NA	NA	38.7015	17.3648	31.0562	87.1225	0	3	0	FALSE	3	FALSE	FALSE
ENSMUST00000171412	ENSMUSG00000039952	Dag1	protein_coding	1428	cds	CCA	TCG	331	-561	chr9	108208945	108208943	-	35018	NA	NA	NA	38.7015	17.3523	31.0562	87.1101	0	3	0	FALSE	3	FALSE	FALSE
ENSMUST00000036004	ENSMUSG00000046434	Hnrnpa1	protein_coding	181	cds	TTT	GAG	33	-340	chr15	103241163	103241165	+	12960	NA	NA	NA	12.6533	11.2179	12.7972	36.6684	0	3	0	FALSE	3	FALSE	TRUE
ENSMUST00000036004	ENSMUSG00000046434	Hnrnpa1	protein_coding	559	cds	GAT	AAG	159	-214	chr15	103242100	103242102	+	12985	NA	NA	NA	12.3686	12.1402	12.8031	37.3118	0	3	0	FALSE	3	FALSE	TRUE
ENSMUST00000087351	ENSMUSG00000046434	Hnrnpa1	protein_coding	537	cds	GAT	AAG	159	-161	chr15	103242078	103242080	+	12982	NA	NA	NA	13.97	11.6894	14.5439	40.2033	0	3	0	FALSE	3	FALSE	TRUE
ENSMUST00000102782	ENSMUSG00000078193	Gm2000	protein_coding	269	cds	TAC	AAG	77	-46	chr1	156366308	156366310	+	1845	NA	NA	NA	10.8096	10.8172	12.6009	34.2278	0	3	0	FALSE	3	FALSE	TRUE
ENSMUST00000143987	ENSMUSG00000024099	Ndufv2	protein_coding	517	cds	CGA	GAT	141	-107	chr17	66087446	66087444	-	15552	NA	NA	NA	12.8837	22.5167	12.3997	47.8001	0	3	0	FALSE	3	FALSE	FALSE
ENSMUST00000024909	ENSMUSG00000024099	Ndufv2	protein_coding	550	cds	CGA	GAT	45	-107	chr17	66087446	66087444	-	15552	NA	NA	NA	12.8837	22.5167	12.3997	47.8001	0	3	0	FALSE	3	FALSE	FALSE
ENSMUST00000138847	ENSMUSG00000024099	Ndufv2	protein_coding	656	cds	CGA	GAT	45	-13	chr17	66087446	66087444	-	15552	NA	NA	NA	12.8837	21.6765	12.3997	46.9599	0	3	0	FALSE	3	FALSE	FALSE
ENSMUST00000034966	ENSMUSG00000032399	Rpl4	protein_coding	980	cds	ATT	CAT	308	-111	chr9	64177915	64177917	+	34178	NA	NA	NA	11.9222	19.6876	25.4262	57.036	0	3	0	FALSE	3	FALSE	TRUE
ENSMUST00000046404	ENSMUSG00000041712	Ubr7	protein_coding	839	cds	TGC	AGC	259	-166	chr12	102768253	102768255	+	8479	NA	NA	NA	11.2713	11.4309	10.1578	32.8601	0	3	0	FALSE	3	FALSE	TRUE
ENSMUST00000042235	ENSMUSG00000037742	Eef1a1	protein_coding	516	cds	ACC	CGC	132	-330	chr9	78480077	78480075	-	34515	NA	NA	NA	13.382	22.2418	16.6994	52.3232	0	3	0	FALSE	3	FALSE	FALSE
ENSMUST00000154207	ENSMUSG00000037742	Eef1a1	protein_coding	508	cds	ACC	CGC	132	-116	chr9	78480077	78480075	-	34515	NA	NA	NA	15.3404	23.2888	17.0204	55.6496	0	3	0	FALSE	3	FALSE	FALSE
ENSMUST00000156988	ENSMUSG00000037742	Eef1a1	protein_coding	583	cds	ACC	CGC	132	-53	chr9	78480077	78480075	-	34515	NA	NA	NA	15.9892	23.2888	17.7156	56.9936	0	3	0	FALSE	3	FALSE	FALSE
ENSMUST00000028222	ENSMUSG00000026864	Hspa5	protein_coding	2232	cds	TTG	NA	654	-1	chr2	34776107	34776109	+	18873	NA	NA	NA	17.558	16.1795	15.5984	49.3359	0	3	0	TRUE	3	FALSE	FALSE
ENSMUST00000100171	ENSMUSG00000026864	Hspa5	protein_coding	2189	cds	TTG	NA	654	-1	chr2	34776107	34776109	+	18873	NA	NA	NA	17.558	16.1795	15.5984	49.3359	0	3	0	TRUE	3	FALSE	FALSE
ENSMUST00000173812	ENSMUSG00000040856	Dlk1	protein_coding	12	cds	CGT	GCC	4	-118	chr12	109459854	109459856	+	8533	NA	NA	NA	11.1301	15.5037	10.1196	36.7534	0	3	0	TRUE	3	FALSE	TRUE
ENSMUST00000029846	ENSMUSG00000028195	Ccn1	protein_coding	414	cds	TTG	GAA	75	-304	chr3	145649278	145649276	-	22485	NA	NA	NA	11.5169	11.676	17.4774	40.6703	0	3	0	FALSE	3	FALSE	TRUE
ENSMUST00000033283	ENSMUSG00000030978	Rrm1	protein_coding	906	cds	CTT	TCT	192	-600	chr7	102450989	102450991	+	30216	NA	NA	NA	10.646	10.5963	11.0334	32.2757	0	3	0	FALSE	3	FALSE	TRUE
ENSMUST00000143349	ENSMUSG00000027184	Caprin1	protein_coding	309	cds	CTG	GTA	103	-111	chr2	103769585	103769583	-	19482	NA	NA	NA	10.6074	14.799	11.3582	36.7646	0	3	0	FALSE	3	FALSE	TRUE
ENSMUST00000088419	ENSMUSG00000022139	Mbnl2	protein_coding	1432	cds	GCC	AAC	250	-123	chr14	120389109	120389111	+	11382	NA	NA	NA	10.4084	29.367	21.2642	61.0396	0	3	0	FALSE	3	FALSE	FALSE
ENSMUST00000035220	ENSMUSG00000032601	Prkar2a	protein_coding	629	cds	GAT	GAA	104	-297	chr9	108716885	108716887	+	35136	NA	NA	NA	10.2867	11.9359	20.0321	42.2547	0	3	0	FALSE	3	FALSE	FALSE
ENSMUST00000195405	ENSMUSG00000032601	Prkar2a	protein_coding	315	cds	GAT	GAA	104	-275	chr9	108716885	108716887	+	35136	NA	NA	NA	10.2867	12.306	20.6275	43.2202	0	3	0	FALSE	3	FALSE	FALSE
ENSMUST00000092425	ENSMUSG00000017404	Rpl19	protein_coding	309	cds	CGG	ATG	85	-109	chr11	98029420	98029422	+	6620	NA	NA	NA	16.2378	10.3758	10.2495	36.8631	0	3	0	FALSE	3	FALSE	FALSE
ENSMUST00000017548	ENSMUSG00000017404	Rpl19	protein_coding	323	cds	CGG	ATG	87	-109	chr11	98029420	98029422	+	6620	NA	NA	NA	14.7973	10.3758	10.2495	35.4226	0	3	0	FALSE	3	FALSE	FALSE
ENSMUST00000139129	ENSMUSG00000018379	Srsf1	protein_coding	853	cds	CCG	AGT	129	-119	chr11	88049050	88049052	+	6237	NA	NA	NA	17.3349	15.2724	17.7419	50.3492	0	3	0	FALSE	3	FALSE	FALSE
ENSMUST00000107920	ENSMUSG00000018379	Srsf1	protein_coding	423	cds	CCG	AGT	129	-124	chr11	88049050	88049052	+	6237	NA	NA	NA	18.0811	15.771	18.3897	52.2418	0	3	0	FALSE	3	FALSE	FALSE
ENSMUST00000081834	ENSMUSG00000049047	Armcx3	protein_coding	296	5utr	NA	NA	-199	-1338	chrX	134758095	134758097	+	36769	NA	NA	NA	11.7618	14.437	18	44.1988	0	3	0	FALSE	3	FALSE	FALSE
ENSMUST00000086880	ENSMUSG00000049047	Armcx3	protein_coding	312	5utr	NA	NA	-199	-1338	chrX	134758095	134758097	+	36769	NA	NA	NA	11.7618	14.437	18	44.1988	0	3	0	FALSE	3	FALSE	FALSE
ENSMUST00000086884	ENSMUSG00000049047	Armcx3	protein_coding	427	5utr	NA	NA	-199	-1338	chrX	134758095	134758097	+	36769	NA	NA	NA	11.7618	14.437	18	44.1988	0	3	0	FALSE	3	FALSE	FALSE
ENSMUST00000052686	ENSMUSG00000049932	H2ax	protein_coding	152	cds	GGC	CGC	28	-115	chr9	44334845	44334847	+	33609	NA	NA	NA	19.3288	19.9479	10.6905	49.9672	0	3	0	FALSE	3	FALSE	TRUE
ENSMUST00000174064	ENSMUSG00000002985	Apoe	protein_coding	822	cds	GGG	GCC	206	-104	chr7	19696673	19696671	-	29023	NA	NA	NA	13.7521	13.5974	10.5841	37.9336	0	3	0	FALSE	3	FALSE	FALSE
ENSMUST00000172983	ENSMUSG00000002985	Apoe	protein_coding	742	cds	GGG	GCC	206	-24	chr7	19696695	19696693	-	29024	NA	NA	NA	10.8887	11.8323	11.2286	33.9496	0	3	0	FALSE	3	FALSE	FALSE
ENSMUST00000129137	ENSMUSG00000027593	Raly	protein_coding	218	cds	ATG	TCC	0	-210	chr2	154857277	154857279	+	20321	NA	NA	NA	10.859	10.0965	16.3956	37.3511	0	3	0	TRUE	3	FALSE	FALSE
ENSMUST00000058089	ENSMUSG00000027593	Raly	protein_coding	484	cds	ATG	TCC	0	-296	chr2	154857277	154857279	+	20321	NA	NA	NA	10.7704	10.5368	17.7491	39.0563	0	3	0	TRUE	3	FALSE	FALSE
ENSMUST00000030623	ENSMUSG00000028820	Sfpq	protein_coding	1218	cds	AAC	GAA	375	-324	chr4	127023398	127023400	+	23825	NA	NA	NA	12.3397	11	21.5133	44.853	0	3	0	FALSE	3	FALSE	TRUE
ENSMUST00000053150	ENSMUSG00000050621	Rps27rt	protein_coding	185	cds	ACG	GTA	51	-33	chr9	114982556	114982554	-	35298	NA	NA	NA	10.4844	11.8917	10.365	32.7411	0	3	0	FALSE	3	FALSE	TRUE
ENSMUST00000034830	ENSMUSG00000032291	Crabp1	protein_coding	448	cds	ACA	CTT	98	-39	chr9	54768428	54768430	+	33870	NA	NA	NA	13.9007	10.6927	14.5068	39.1002	0	3	0	FALSE	3	FALSE	TRUE
ENSMUST00000023100	ENSMUSG00000022463	Srebf2	protein_coding	2124	cds	CGG	GCT	634	-496	chr15	82182239	82182241	+	12424	NA	NA	NA	21.3853	14.9926	11.3252	47.7031	0	3	0	FALSE	3	FALSE	TRUE
ENSMUST00000007130	ENSMUSG00000006932	Ctnnb1	protein_coding	806	cds	ATG	GTC	172	-608	chr9	120951290	120951292	+	35391	NA	NA	NA	11.5712	12.757	13.4703	37.7985	0	3	0	FALSE	3	FALSE	FALSE
ENSMUST00000029266	ENSMUSG00000027712	Anxa5	protein_coding	506	cds	CAG	GAG	52	-267	chr3	36463988	36463986	-	20954	NA	NA	NA	12.5134	11.8764	15.3983	39.7881	0	3	0	FALSE	3	FALSE	TRUE
ENSMUST00000117757	ENSMUSG00000057666	Gapdh	protein_coding	167	cds	GTG	GAG	51	-308	chr6	125163385	125163383	-	28404	NA	NA	NA	11.5168	26.507	25.8953	63.9191	0	3	0	FALSE	3	FALSE	FALSE
ENSMUST00000182052	ENSMUSG00000057666	Gapdh	protein_coding	354	cds	ACA	GTC	16	-38	chr6	125163292	125163290	-	28390	NA	NA	NA	11.0102	12.0208	22.903	45.934	0	3	0	FALSE	3	FALSE	FALSE
ENSMUST00000182277	ENSMUSG00000057666	Gapdh	protein_coding	385	cds	GTG	GAG	25	-31	chr6	125163385	125163383	-	28404	NA	NA	NA	11.3354	25.0542	25.0957	61.4852	0	3	0	FALSE	3	FALSE	FALSE
ENSMUST00000073605	ENSMUSG00000057666	Gapdh	protein_coding	167	cds	GTG	GAG	25	-308	chr6	125163385	125163383	-	28404	NA	NA	NA	10.3157	23.8581	23.6562	57.83	0	3	0	FALSE	3	FALSE	FALSE
ENSMUST00000031402	ENSMUSG00000029447	Cct6a	protein_coding	498	cds	GTC	TTG	166	-366	chr5	129789978	129789980	+	25994	NA	NA	NA	10.7387	11.6331	11.3849	33.7566	0	3	0	FALSE	3	FALSE	TRUE
ENSMUST00000026125	ENSMUSG00000025134	Alyref	protein_coding	261	cds	CCG	AAA	78	-177	chr11	120597766	120598105	-	7531	NA	NA	NA	12.8454	14.0194	16.5989	43.4638	0	3	0	FALSE	3	FALSE	TRUE
ENSMUST00000051477	ENSMUSG00000006699	Cdc42	protein_coding	491	cds	CCC	TCT	122	-69	chr4	137328833	137328831	-	24140	NA	NA	NA	18.2663	10.9944	14.4152	43.6759	0	3	0	FALSE	3	FALSE	FALSE
ENSMUST00000066039	ENSMUSG00000053536	Cstf2t	protein_coding	1624	cds	GGC	CCT	464	-167	chr19	31084464	31084466	+	17669	NA	NA	NA	15.3841	12.5061	16.2317	44.1219	0	3	0	FALSE	3	FALSE	FALSE
ENSMUST00000066039	ENSMUSG00000053536	Cstf2t	protein_coding	2062	cds	CCC	GAA	610	-21	chr19	31084902	31084904	+	17670	NA	NA	NA	52.7109	45.6566	61	159.368	0	3	0	FALSE	3	FALSE	FALSE
ENSMUST00000006565	ENSMUSG00000006398	Cdc20	protein_coding	1512	cds	TGG	AAG	427	-72	chr4	118433521	118433519	-	23581	NA	NA	NA	11.9746	15.9166	11.5227	39.4139	0	3	0	FALSE	3	FALSE	TRUE
ENSMUST00000170122	ENSMUSG00000090733	Rps27	protein_coding	189	cds	ACG	GTA	51	-33	chr3	90212971	90212969	-	21574	NA	NA	NA	10.4844	11.8917	10.365	32.7411	0	3	0	FALSE	3	FALSE	TRUE
ENSMUST00000121339	ENSMUSG00000034211	Mrps17	protein_coding	1456	cds	TCC	NA	119	-1	chr5	129718149	129718151	+	25985	NA	NA	NA	15.4491	10.2135	12.9571	38.6196	0	3	0	TRUE	3	FALSE	FALSE
ENSMUST00000043456	ENSMUSG00000038729	Pakap	protein_coding	1837	cds	CCT	TCG	441	-452	chr4	57855995	57855997	+	23019	NA	NA	NA	10.8426	11.5378	27.8019	50.1823	0	3	0	FALSE	3	FALSE	FALSE
ENSMUST00000016771	ENSMUSG00000022443	Myh9	protein_coding	4786	cds	GGC	AAG	1516	-444	chr15	77767460	77767458	-	12028	NA	NA	NA	10.98	11.8737	15.9153	38.769	0	3	0	FALSE	3	FALSE	TRUE
ENSMUST00000194690	ENSMUSG00000026674	Ddr2	protein_coding	1194	cds	GAT	GAT	239	-615	chr1	170001967	170001965	-	1999	NA	NA	NA	17.2879	12.254	11.658	41.1998	0	3	0	FALSE	3	FALSE	FALSE
ENSMUST00000027985	ENSMUSG00000026674	Ddr2	protein_coding	1029	cds	GAT	GAT	239	-615	chr1	170001967	170001965	-	1999	NA	NA	NA	17.2879	12.254	11.658	41.1998	0	3	0	FALSE	3	FALSE	FALSE
ENSMUST00000170800	ENSMUSG00000026674	Ddr2	protein_coding	894	cds	GAT	GAT	239	-615	chr1	170001967	170001965	-	1999	NA	NA	NA	17.2879	12.254	11.658	41.1998	0	3	0	FALSE	3	FALSE	FALSE
ENSMUST00000045356	ENSMUSG00000041841	Rpl37	protein_coding	169	cds	AGG	AAG	44	-53	chr15	5117383	5117385	+	11460	NA	NA	NA	15.4459	11.2211	10.3977	37.0647	0	3	0	FALSE	3	FALSE	TRUE
ENSMUST00000020283	ENSMUSG00000020086	Macroh2a2	protein_coding	1537	cds	AAG	NA	371	-1	chr10	61739303	61739301	-	2875	NA	NA	NA	13.4144	12.7476	18.7942	44.9562	0	3	0	TRUE	3	FALSE	TRUE
ENSMUST00000086199	ENSMUSG00000026473	Glul	protein_coding	564	cds	CCA	TTT	144	-228	chr1	153906455	153906457	+	1798	NA	NA	NA	11.2789	13	17.9196	42.1985	0	3	0	FALSE	3	FALSE	TRUE
ENSMUST00000065793	ENSMUSG00000053398	Phgdh	protein_coding	1529	cds	CCA	CTA	457	-76	chr3	98314244	98314242	-	21885	NA	NA	NA	12.7407	13.2324	21.5373	47.5105	0	3	0	FALSE	3	FALSE	TRUE
ENSMUST00000064447	ENSMUSG00000052533	Nup188	protein_coding	2529	cds	CCT	TCT	828	-930	chr2	30327541	30327543	+	18617	NA	NA	NA	15.3606	10.4468	20.4817	46.2891	0	3	0	FALSE	3	FALSE	FALSE
ENSMUST00000040766	ENSMUSG00000021248	Tmed10	protein_coding	182	cds	ATG	TCT	0	-219	chr12	85374536	85374534	-	8328	NA	NA	NA	12.4039	18.0768	18.8189	49.2996	0	3	0	TRUE	3	FALSE	TRUE
ENSMUST00000043359	ENSMUSG00000031715	Smarca5	protein_coding	1613	cds	CCA	AAA	404	-647	chr8	80720741	80720739	-	32165	NA	NA	NA	16.5438	11.4195	28.7714	56.7347	0	3	0	FALSE	3	FALSE	FALSE
ENSMUST00000086580	ENSMUSG00000053110	Yap1	protein_coding	133	5utr	NA	NA	-66	-1484	chr9	8004456	8004454	-	33148	NA	NA	NA	10.1666	13.7895	14.3453	38.3014	0	3	0	FALSE	3	FALSE	FALSE
ENSMUST00000065353	ENSMUSG00000053110	Yap1	protein_coding	141	5utr	NA	NA	-66	-1532	chr9	8004456	8004454	-	33148	NA	NA	NA	10.3147	14.0849	14.0792	38.4788	0	3	0	FALSE	3	FALSE	FALSE
ENSMUST00000109354	ENSMUSG00000057113	Npm1	protein_coding	776	cds	AAA	AAA	226	-31	chr11	33156090	33156088	-	4778	NA	NA	NA	11.414	10.1487	13.0239	34.5866	0	3	0	FALSE	3	FALSE	FALSE
ENSMUST00000101375	ENSMUSG00000057113	Npm1	protein_coding	775	cds	AAA	AAA	226	-59	chr11	33156090	33156088	-	4778	NA	NA	NA	11.414	11.2652	13.0239	35.7031	0	3	0	FALSE	3	FALSE	FALSE
ENSMUST00000178310	ENSMUSG00000038274	Fau	protein_coding	328	cds	GGC	CAG	54	-79	chr19	6058561	6058563	+	16928	NA	NA	NA	10.1319	17.7699	11.4853	39.3871	0	3	0	FALSE	3	FALSE	TRUE
ENSMUST00000043074	ENSMUSG00000038274	Fau	protein_coding	226	cds	GGC	CAG	54	-79	chr19	6058456	6058458	+	16926	NA	NA	NA	12.42	22.463	15.9802	50.8632	0	3	0	FALSE	3	FALSE	TRUE
ENSMUST00000179142	ENSMUSG00000038274	Fau	protein_coding	446	cds	GGC	CAG	54	-79	chr19	6058514	6058516	+	16927	NA	NA	NA	11.5271	19.0475	13.781	44.3556	0	3	0	FALSE	3	FALSE	TRUE
ENSMUST00000124971	ENSMUSG00000025499	Hras	nonsense_mediated_decay	699	3utr	NA	NA	614	255	chr7	141191353	141191351	-	30991	NA	NA	NA	10.6104	10.7591	13.1928	34.5623	0	3	0	FALSE	3	FALSE	FALSE
ENSMUST00000135678	ENSMUSG00000025428	Atp5a1	nonsense_mediated_decay	426	3utr	NA	NA	366	97	chr18	77782307	77782309	+	16671	NA	NA	NA	12.5787	10.2245	15.7874	38.5906	0	3	0	FALSE	3	FALSE	FALSE
ENSMUST00000024739	ENSMUSG00000023944	Hsp90ab1	protein_coding	1500	cds	ATG	ACC	465	-259	chr17	45569307	45569305	-	15280	NA	NA	NA	11.8073	10.1824	16.755	38.7446	0	3	0	FALSE	3	FALSE	FALSE
ENSMUST00000165127	ENSMUSG00000023944	Hsp90ab1	protein_coding	396	cds	ATG	ACC	103	-58	chr17	45569307	45569305	-	15280	NA	NA	NA	11.8073	10.1824	16.755	38.7446	0	3	0	FALSE	3	FALSE	FALSE
ENSMUST00000092584	ENSMUSG00000069662	Marcks	protein_coding	202	5utr	NA	NA	-184	-1113	chr10	37138719	37138717	-	2662	NA	NA	NA	12.4406	10.1685	10.0347	32.6437	0	3	0	FALSE	3	FALSE	TRUE
ENSMUST00000051094	ENSMUSG00000015341	Golga7	protein_coding	137	cds	GGC	ACG	19	-117	chr8	23256725	23256723	-	31512	NA	NA	NA	14.5546	29.1562	17.6246	61.3354	0	3	0	FALSE	3	FALSE	FALSE
ENSMUST00000121783	ENSMUSG00000015341	Golga7	protein_coding	297	cds	GGC	ACG	19	-117	chr8	23256725	23256723	-	31512	NA	NA	NA	14.5546	29.1562	17.6246	61.3354	0	3	0	FALSE	3	FALSE	FALSE
ENSMUST00000177397	ENSMUSG00000058258	Idi1	protein_coding	363	cds	AGG	CGA	121	-41	chr13	8887965	8887967	+	8784	NA	NA	NA	10.3482	11.8357	12.8997	35.0836	0	3	0	FALSE	3	FALSE	FALSE
ENSMUST00000177447	ENSMUSG00000058258	Idi1	protein_coding	312	cds	AGG	CGA	104	-41	chr13	8887965	8887967	+	8784	NA	NA	NA	10.3482	11.3406	12.8997	34.5885	0	3	0	FALSE	3	FALSE	FALSE
ENSMUST00000193426	ENSMUSG00000019817	Plagl1	protein_coding	980	cds	GCT	GAG	36	-85	chr10	13125124	13125126	+	2457	NA	NA	NA	17.818	16	19	52.818	0	3	0	FALSE	3	FALSE	FALSE
ENSMUST00000121646	ENSMUSG00000019817	Plagl1	protein_coding	663	cds	GCT	GAG	36	-668	chr10	13125124	13125126	+	2457	NA	NA	NA	17.818	16	19	52.818	0	3	0	FALSE	3	FALSE	FALSE
ENSMUST00000121325	ENSMUSG00000019817	Plagl1	protein_coding	690	cds	GCT	GAG	36	-642	chr10	13125124	13125126	+	2457	NA	NA	NA	17.818	16	19	52.818	0	3	0	FALSE	3	FALSE	FALSE
ENSMUST00000121766	ENSMUSG00000019817	Plagl1	protein_coding	654	cds	GCT	GAG	36	-642	chr10	13125124	13125126	+	2457	NA	NA	NA	17.818	16	19	52.818	0	3	0	FALSE	3	FALSE	FALSE
ENSMUST00000130313	ENSMUSG00000019817	Plagl1	protein_coding	380	cds	GCT	GAG	36	-80	chr10	13125124	13125126	+	2457	NA	NA	NA	17.818	16	19	52.818	0	3	0	FALSE	3	FALSE	FALSE
ENSMUST00000125184	ENSMUSG00000090137	Uba52	protein_coding	369	cds	GAC	CAG	38	-90	chr8	70509372	70509370	-	31989	NA	NA	NA	10.1712	13.465	12.4705	36.1067	0	3	0	FALSE	3	FALSE	FALSE
ENSMUST00000172282	ENSMUSG00000006498	Ptbp1	protein_coding	1829	cds	CGC	AAG	514	-41	chr10	79863151	79863153	+	3120	NA	NA	NA	15.7294	10.522	12.4735	38.7249	0	3	0	FALSE	3	FALSE	FALSE
ENSMUST00000165704	ENSMUSG00000006498	Ptbp1	protein_coding	1549	cds	CGC	AAG	488	-41	chr10	79863151	79863153	+	3120	NA	NA	NA	15.4324	10.4757	12.2596	38.1676	0	3	0	FALSE	3	FALSE	FALSE
ENSMUST00000095457	ENSMUSG00000006498	Ptbp1	protein_coding	1390	cds	CGC	AAG	448	-41	chr10	79863151	79863153	+	3120	NA	NA	NA	15.4443	10.4997	12.3055	38.2495	0	3	0	FALSE	3	FALSE	FALSE
ENSMUST00000107771	ENSMUSG00000003868	Ruvbl2	protein_coding	1275	cds	ATT	GAG	304	-158	chr7	45424165	45424163	-	29632	NA	NA	NA	13.1626	15.9167	16.955	46.0343	0	3	0	FALSE	3	FALSE	TRUE
ENSMUST00000174477	ENSMUSG00000015165	Hnrnpl	protein_coding	156	cds	GAA	GAC	52	-562	chr7	28811092	28811094	+	29216	NA	NA	NA	16.0031	12.7663	17.145	45.9143	0	3	0	FALSE	3	FALSE	TRUE
ENSMUST00000108345	ENSMUSG00000047213	Ythdf3	protein_coding	963	cds	CCT	GTT	226	-359	chr3	16204368	16204370	+	20812	NA	NA	NA	23.4231	18.3453	11.8323	53.6008	0	3	0	FALSE	3	FALSE	FALSE
ENSMUST00000191774	ENSMUSG00000047213	Ythdf3	protein_coding	1088	cds	CCT	GTT	230	-359	chr3	16204368	16204370	+	20812	NA	NA	NA	23.4231	18.8454	11.8323	54.1009	0	3	0	FALSE	3	FALSE	FALSE
ENSMUST00000108346	ENSMUSG00000047213	Ythdf3	protein_coding	972	cds	CCT	GTT	237	-359	chr3	16204368	16204370	+	20812	NA	NA	NA	23.4231	18.5331	11.8323	53.7886	0	3	0	FALSE	3	FALSE	FALSE
ENSMUST00000004968	ENSMUSG00000004846	Plod3	protein_coding	2140	cds	CCA	GAT	491	-250	chr5	136991405	136991407	+	26189	NA	NA	NA	13.2291	14.8388	14	42.0679	0	3	0	FALSE	3	FALSE	TRUE
ENSMUST00000027752	ENSMUSG00000026478	Lamc1	protein_coding	778	cds	GGG	TCC	177	-1430	chr1	153262576	153262574	-	1763	NA	NA	NA	10.3293	13.4939	11.0816	34.9048	0	3	0	FALSE	3	FALSE	TRUE
ENSMUST00000076219	ENSMUSG00000041360	Pum3	protein_coding	1163	cds	GGC	ACA	373	-274	chr19	27416742	27416740	-	17653	NA	NA	NA	10.2062	13.5677	11.0851	34.8591	0	3	0	FALSE	3	FALSE	TRUE
ENSMUST00000077577	ENSMUSG00000023004	Tuba1b	protein_coding	545	cds	GGC	CAC	105	-346	chr15	98932752	98932750	-	12693	NA	NA	NA	11.2916	19.1072	16.5632	46.962	0	3	0	FALSE	3	FALSE	TRUE
ENSMUST00000058914	ENSMUSG00000043091	Tuba1c	protein_coding	846	cds	GGC	CAC	105	-344	chr15	99034537	99034539	+	12783	NA	NA	NA	11.2916	19.1072	16.5632	46.962	0	3	0	FALSE	3	FALSE	TRUE
ENSMUST00000066264	ENSMUSG00000053898	Ech1	protein_coding	495	cds	GAC	CTC	117	-210	chr7	28829804	28829806	+	29251	NA	NA	NA	10.6145	18	21.1333	49.7478	0	3	0	FALSE	3	FALSE	FALSE
ENSMUST00000102969	ENSMUSG00000069272	H2ac8	protein_coding	250	cds	GGC	GCC	46	-84	chr13	23570872	23570870	-	9165	NA	NA	NA	20.5725	10.2514	13.3246	44.1485	0	3	0	FALSE	3	FALSE	TRUE
ENSMUST00000077886	ENSMUSG00000094973	Eif4a3l1	protein_coding	669	cds	GAG	ATC	222	-188	chr6	136329211	136329213	+	28566	NA	NA	NA	17.7158	11.8357	11.2789	40.8304	0	3	0	FALSE	3	FALSE	FALSE
ENSMUST00000068045	ENSMUSG00000054808	Actn4	protein_coding	787	cds	ATT	GAG	209	-702	chr7	28913402	28913400	-	29302	NA	NA	NA	11.3335	12.0831	14.8492	38.2658	0	3	0	FALSE	3	FALSE	FALSE
ENSMUST00000127210	ENSMUSG00000054808	Actn4	protein_coding	670	cds	ATT	GAG	209	-307	chr7	28913402	28913400	-	29302	NA	NA	NA	11.3335	12.2204	14.8492	38.4031	0	3	0	FALSE	3	FALSE	FALSE
ENSMUST00000140622	ENSMUSG00000054808	Actn4	protein_coding	531	cds	ATT	GAG	124	-80	chr7	28913402	28913400	-	29302	NA	NA	NA	11.3335	12.2204	14.8492	38.4031	0	3	0	FALSE	3	FALSE	FALSE
ENSMUST00000148196	ENSMUSG00000054808	Actn4	protein_coding	593	cds	ATT	GAG	124	-7	chr7	28913402	28913400	-	29302	NA	NA	NA	11.3335	12.2204	14.8492	38.4031	0	3	0	FALSE	3	FALSE	FALSE
ENSMUST00000105105	ENSMUSG00000099583	H3c4	protein_coding	129	cds	CCG	GCC	30	-106	chr13	23575891	23575893	+	9205	NA	NA	NA	12.7572	14.1514	17.4549	44.3634	0	3	0	FALSE	3	FALSE	TRUE
ENSMUST00000062045	ENSMUSG00000051627	H1f4	protein_coding	175	cds	CCG	GTG	38	-181	chr13	23622328	23622326	-	9252	NA	NA	NA	16.8161	12.1278	19.584	48.5279	0	3	0	FALSE	3	FALSE	TRUE
ENSMUST00000118543	ENSMUSG00000047215	Rpl9	protein_coding	290	cds	CGG	TCT	92	-74	chr5	65389590	65389588	-	25155	NA	NA	NA	14.0636	15.5136	15.4529	45.0301	0	3	0	FALSE	3	FALSE	TRUE
ENSMUST00000057885	ENSMUSG00000047215	Rpl9	protein_coding	346	cds	CGG	TCT	92	-100	chr5	65389592	65389590	-	25156	NA	NA	NA	13.9511	15.3126	15.5966	44.8603	0	3	0	FALSE	3	FALSE	TRUE
ENSMUST00000120094	ENSMUSG00000047215	Rpl9	protein_coding	282	cds	CGG	TCT	92	-100	chr5	65389593	65389591	-	25157	NA	NA	NA	13.9511	15.3126	15.5966	44.8603	0	3	0	FALSE	3	FALSE	TRUE
ENSMUST00000102967	ENSMUSG00000060678	H4c3	protein_coding	263	cds	GTG	GTC	86	-17	chr13	23698192	23698190	-	9276	NA	NA	NA	10.7182	11.9095	20.8468	43.4745	0	3	0	FALSE	3	FALSE	TRUE
ENSMUST00000087714	ENSMUSG00000067455	H4c11	protein_coding	290	cds	GTG	GTC	86	-17	chr13	21735353	21735355	+	8930	NA	NA	NA	10.0945	10.6739	20.3512	41.1196	0	3	0	FALSE	3	FALSE	TRUE
ENSMUST00000074752	ENSMUSG00000063021	H2ac15	protein_coding	138	cds	GGC	GCC	46	-84	chr13	21753690	21753688	-	8943	NA	NA	NA	18.4594	10.6927	11.2687	40.4209	0	3	0	FALSE	3	FALSE	TRUE
ENSMUST00000031103	ENSMUSG00000029201	Ugdh	protein_coding	1671	cds	GGG	CTC	446	-47	chr5	65416858	65416856	-	25199	NA	NA	NA	10.2768	12.5844	11.6659	34.5271	0	3	0	FALSE	3	FALSE	TRUE
ENSMUST00000091752	ENSMUSG00000069310	H3c3	protein_coding	195	cds	CCG	GCC	30	-106	chr13	23745307	23745305	-	9317	NA	NA	NA	10.5614	12.2185	16.8476	39.6275	0	3	0	FALSE	3	FALSE	TRUE
ENSMUST00000025649	ENSMUSG00000024740	Ddb1	protein_coding	790	cds	GGC	CTT	137	-1003	chr19	10611688	10611690	+	17479	NA	NA	NA	16.52	21.2893	15.6154	53.4247	0	3	0	FALSE	3	FALSE	FALSE
ENSMUST00000102965	ENSMUSG00000069266	H4c2	protein_coding	266	cds	GTG	GTC	86	-17	chr13	23757278	23757280	+	9366	NA	NA	NA	11.1578	11.3494	20.7985	43.3057	0	3	0	FALSE	3	FALSE	TRUE
ENSMUST00000102964	ENSMUSG00000060093	H4c1	protein_coding	331	cds	GTG	GTC	86	-17	chr13	23760900	23760898	-	9371	NA	NA	NA	10.155	10.1273	19.5035	39.7857	0	3	0	FALSE	3	FALSE	TRUE
ENSMUST00000091701	ENSMUSG00000069265	H3c1	protein_coding	312	cds	CAG	GAG	93	-43	chr13	23762075	23762073	-	9384	NA	NA	NA	17.328	10.3529	13.9172	41.598	0	3	0	FALSE	3	FALSE	TRUE
ENSMUST00000032934	ENSMUSG00000030695	Aldoa	protein_coding	1020	cds	GCT	GTC	263	-101	chr7	126795960	126795958	-	30710	NA	NA	NA	14.4831	17.4304	15.678	47.5915	0	3	0	FALSE	3	FALSE	FALSE
ENSMUST00000106348	ENSMUSG00000030695	Aldoa	protein_coding	970	cds	GCT	GTC	263	-101	chr7	126795960	126795958	-	30710	NA	NA	NA	14.4831	17.4571	15.678	47.6182	0	3	0	FALSE	3	FALSE	FALSE
ENSMUST00000087566	ENSMUSG00000030695	Aldoa	protein_coding	1060	cds	GCT	GTC	317	-101	chr7	126795960	126795958	-	30710	NA	NA	NA	14.4831	17.4304	15.678	47.5915	0	3	0	FALSE	3	FALSE	FALSE
ENSMUST00000189457	ENSMUSG00000101972	H3c11	protein_coding	279	cds	CAG	GAG	93	-43	chr13	21783092	21783090	-	8969	NA	NA	NA	16.8946	10.5253	13.6245	41.0444	0	3	0	FALSE	3	FALSE	TRUE
ENSMUST00000068795	ENSMUSG00000055302	Mrfap1	protein_coding	239	cds	GAG	GAG	20	-105	chr5	36796534	36796532	-	24898	NA	NA	NA	10.4075	12.0364	10.9551	33.3991	0	3	0	FALSE	3	FALSE	TRUE
ENSMUST00000042345	ENSMUSG00000037815	Ctnna1	protein_coding	317	cds	GTT	GAA	64	-842	chr18	35154460	35154462	+	16058	NA	NA	NA	11.028	13.5105	21.4574	45.9959	0	3	0	FALSE	3	FALSE	TRUE
ENSMUST00000108428	ENSMUSG00000040952	Rps19	protein_coding	200	cds	GCT	GCT	56	-156	chr7	24885548	24885550	+	29084	NA	NA	NA	10.7134	16.2801	15.0007	41.9942	0	3	0	FALSE	3	FALSE	FALSE
ENSMUST00000108429	ENSMUSG00000040952	Rps19	protein_coding	324	cds	GCT	GCT	56	-89	chr7	24885548	24885550	+	29084	NA	NA	NA	10.1846	13.1344	14.436	37.755	0	3	0	FALSE	3	FALSE	FALSE
ENSMUST00000022293	ENSMUSG00000021771	Vdac2	protein_coding	427	cds	GCT	GAG	1	-294	chr14	21831878	21831880	+	10568	NA	NA	NA	11.3871	10.6495	12.1931	34.2297	0	3	0	TRUE	3	FALSE	FALSE
ENSMUST00000153320	ENSMUSG00000021771	Vdac2	protein_coding	292	cds	GCT	GAG	1	-199	chr14	21831878	21831880	+	10568	NA	NA	NA	12.9206	12.2501	14.2987	39.4694	0	3	0	TRUE	3	FALSE	FALSE
ENSMUST00000106251	ENSMUSG00000030795	Fus	protein_coding	561	cds	AAC	CCA	151	-367	chr7	127972231	127972233	+	30758	NA	NA	NA	12.4702	12.531	14.9666	39.9678	0	3	0	FALSE	3	FALSE	FALSE
ENSMUST00000077609	ENSMUSG00000030795	Fus	protein_coding	525	cds	AAC	CCA	150	-367	chr7	127972231	127972233	+	30758	NA	NA	NA	12.4702	12.531	14.9666	39.9678	0	3	0	FALSE	3	FALSE	FALSE
ENSMUST00000121616	ENSMUSG00000030795	Fus	protein_coding	510	cds	AAC	CCA	151	-129	chr7	127972231	127972233	+	30758	NA	NA	NA	12.4702	12.531	14.9666	39.9678	0	3	0	FALSE	3	FALSE	FALSE
ENSMUST00000141997	ENSMUSG00000030795	Fus	protein_coding	579	3utr	NA	NA	578	266	chr7	127981825	127981827	+	30785	NA	NA	NA	13.4759	16.1531	16.5704	46.1994	0	3	0	FALSE	3	FALSE	TRUE
ENSMUST00000078717	ENSMUSG00000034158	Lrrc58	protein_coding	3196	3utr	NA	NA	3088	1988	chr16	37883450	37883452	+	13726	NA	NA	NA	12.6577	13.381	21.741	47.7797	0	3	0	FALSE	3	FALSE	TRUE
ENSMUST00000110452	ENSMUSG00000069300	H2bc11	protein_coding	151	cds	CTG	AAG	45	-81	chr13	22043364	22043366	+	9084	NA	NA	NA	12.9961	22.3393	10.4889	45.8243	0	3	0	FALSE	3	FALSE	TRUE
ENSMUST00000038169	ENSMUSG00000033307	Mif	protein_coding	396	cds	TGG	AAC	108	-7	chr10	75859511	75859509	-	2960	NA	NA	NA	13.2479	13.2046	12.2617	38.7142	0	3	0	FALSE	3	FALSE	TRUE
ENSMUST00000147835	ENSMUSG00000083649	Rasl2-9	protein_coding	255	cds	TAC	TAC	78	-138	chr7	5125696	5125694	-	28821	NA	NA	NA	12.1966	11.2134	12.4291	35.8391	0	3	0	FALSE	3	FALSE	TRUE
ENSMUST00000033160	ENSMUSG00000030872	Gga2	protein_coding	1589	cds	GGC	TTC	485	-118	chr7	121991629	121991627	-	30557	NA	NA	NA	15.199	16.5247	13.8034	45.5271	0	3	0	FALSE	3	FALSE	FALSE
ENSMUST00000124566	ENSMUSG00000030872	Gga2	nonsense_mediated_decay	1534	cds	GGC	TTC	485	-118	chr7	121991629	121991627	-	30557	NA	NA	NA	15.199	16.5247	13.8034	45.5271	0	3	0	FALSE	3	FALSE	FALSE
ENSMUST00000115414	ENSMUSG00000032178	Ilf3	protein_coding	774	cds	CCG	GAC	194	-509	chr9	21393749	21393751	+	33243	NA	NA	NA	14.7966	12.7248	11.2788	38.8002	0	3	0	FALSE	3	FALSE	FALSE
ENSMUST00000093360	ENSMUSG00000031691	Tnpo2	protein_coding	1451	cds	TCA	GAT	444	-453	chr8	85049997	85049999	+	32331	NA	NA	NA	10.6145	11.2789	10.1178	32.0112	0	3	0	FALSE	3	FALSE	FALSE
ENSMUST00000166592	ENSMUSG00000031691	Tnpo2	protein_coding	1469	cds	TCA	GAT	444	-453	chr8	85049997	85049999	+	32331	NA	NA	NA	10.6145	11.2789	10.1178	32.0112	0	3	0	FALSE	3	FALSE	FALSE
ENSMUST00000156481	ENSMUSG00000015804	Med28	protein_coding	502	cds	CTG	AGG	135	-43	chr5	45525210	45525212	+	24963	NA	NA	NA	11.6456	10.0009	11.5157	33.1622	0	3	0	FALSE	3	FALSE	TRUE
ENSMUST00000165216	ENSMUSG00000001441	Npepps	protein_coding	2577	cds	CAG	CAT	859	-16	chr11	97207168	97207166	-	6554	NA	NA	NA	14.7966	17	11.2887	43.0853	0	3	0	FALSE	3	FALSE	TRUE
ENSMUST00000120381	ENSMUSG00000032116	Stt3a	protein_coding	1324	cds	CGG	ATT	385	-320	chr9	36746608	36746606	-	33460	NA	NA	NA	14.9755	14.5476	11.4602	40.9834	0	3	0	FALSE	3	FALSE	TRUE
ENSMUST00000034049	ENSMUSG00000031633	Slc25a4	protein_coding	677	cds	CAT	AAG	105	-193	chr8	46209305	46209303	-	31800	NA	NA	NA	15.5136	36.068	10.2491	61.8306	0	3	0	FALSE	3	FALSE	TRUE
ENSMUST00000132118	ENSMUSG00000026385	Dbi	nonsense_mediated_decay	362	3utr	NA	NA	297	64	chr1	120113532	120113530	-	1486	NA	NA	NA	13.359	13.7182	23.513	50.5902	0	3	0	FALSE	3	FALSE	FALSE
ENSMUST00000038770	ENSMUSG00000039646	Vasn	protein_coding	373	cds	CCT	GAC	52	-621	chr16	4648346	4648348	+	13046	NA	NA	NA	34.8905	23.4961	24.6713	83.0578	0	3	0	FALSE	3	FALSE	FALSE
ENSMUST00000033096	ENSMUSG00000030824	Nucb1	protein_coding	659	cds	CCC	AAA	215	-240	chr7	45498823	45498821	-	29657	NA	NA	NA	13.9249	18.5	14.006	46.4309	0	3	0	FALSE	3	FALSE	TRUE
ENSMUST00000022849	ENSMUSG00000022241	Tars	protein_coding	384	cds	CCT	GAC	86	-636	chr15	11394285	11394283	-	11544	NA	NA	NA	10.4822	11.6237	17.6086	39.7144	0	3	0	FALSE	3	FALSE	TRUE
ENSMUST00000025955	ENSMUSG00000024991	Eif3a	protein_coding	3510	cds	CCT	TGG	1128	-216	chr19	60766409	60766407	-	18091	NA	NA	NA	10.503	12.3891	12.6214	35.5135	0	3	0	FALSE	3	FALSE	FALSE
ENSMUST00000170953	ENSMUSG00000090862	Rps13	protein_coding	169	cds	TTG	ACG	27	-124	chr7	116333761	116333759	-	30501	NA	NA	NA	10.9118	14.7878	12.7332	38.4328	0	3	0	FALSE	3	FALSE	TRUE
ENSMUST00000102898	ENSMUSG00000062647	Rpl7a	protein_coding	634	cds	GGG	CAC	190	-76	chr2	26912745	26912747	+	18360	NA	NA	NA	14.7823	12.301	22.556	49.6394	0	3	0	FALSE	3	FALSE	TRUE
ENSMUST00000146867	ENSMUSG00000044533	Rps2	protein_coding	904	cds	TGT	GGC	293	-9	chr17	24721867	24721869	+	14543	NA	NA	NA	15.9632	12.1966	14.1466	42.3064	0	3	0	FALSE	3	FALSE	TRUE
ENSMUST00000072239	ENSMUSG00000019961	Tmpo	protein_coding	485	cds	CCC	ACG	72	-380	chr10	91171098	91171096	-	3632	NA	NA	NA	12.9692	19.9755	11.575	44.5197	0	3	0	FALSE	3	FALSE	TRUE
ENSMUST00000099355	ENSMUSG00000019961	Tmpo	protein_coding	455	cds	CCC	ACG	72	-308	chr10	91171128	91171126	-	3635	NA	NA	NA	12.9692	19.9755	11.575	44.5197	0	3	0	FALSE	3	FALSE	FALSE
ENSMUST00000105293	ENSMUSG00000019961	Tmpo	protein_coding	455	cds	CCC	ACG	72	-271	chr10	91171128	91171126	-	3635	NA	NA	NA	12.9692	19.9755	11.575	44.5197	0	3	0	FALSE	3	FALSE	FALSE
ENSMUST00000092219	ENSMUSG00000019961	Tmpo	protein_coding	471	cds	CCC	ACG	72	-340	chr10	91171112	91171110	-	3634	NA	NA	NA	12.9692	19.9755	11.575	44.5197	0	3	0	FALSE	3	FALSE	TRUE
ENSMUST00000020123	ENSMUSG00000019961	Tmpo	protein_coding	481	cds	CCC	ACG	72	-621	chr10	91171102	91171100	-	3633	NA	NA	NA	12.9692	19.9755	11.575	44.5197	0	3	0	FALSE	3	FALSE	TRUE
ENSMUST00000000193	ENSMUSG00000035385	Ccl2	protein_coding	391	cds	ACT	TTA	100	-48	chr11	82037031	82037033	+	6096	NA	NA	NA	11.4636	16.3299	17.9639	45.7575	0	3	0	FALSE	3	FALSE	FALSE
ENSMUST00000022842	ENSMUSG00000022234	Cct5	protein_coding	1014	cds	TTT	GAC	305	-236	chr15	31593634	31594097	-	11609	NA	NA	NA	13.2376	10.6066	13.8733	37.7175	0	3	0	FALSE	3	FALSE	TRUE
ENSMUST00000023455	ENSMUSG00000022771	Ppil2	protein_coding	1643	cds	TGG	NA	520	-1	chr16	17088776	17088774	-	13198	NA	NA	NA	22.3763	15.1052	11.7136	49.1951	0	3	0	TRUE	3	FALSE	FALSE
ENSMUST00000164458	ENSMUSG00000022771	Ppil2	protein_coding	1599	cds	TGG	NA	520	-1	chr16	17088815	17088813	-	13199	NA	NA	NA	22.2596	15.1052	11.6633	49.0281	0	3	0	TRUE	3	FALSE	FALSE
ENSMUST00000089217	ENSMUSG00000001924	Uba1	protein_coding	2892	cds	ACA	GCT	897	-161	chrX	20681367	20681369	+	35832	NA	NA	NA	10.1431	14.9851	15.4249	40.553	0	3	0	FALSE	3	FALSE	FALSE
ENSMUST00000001989	ENSMUSG00000001924	Uba1	protein_coding	2919	cds	ACA	GCT	897	-161	chrX	20681367	20681369	+	35832	NA	NA	NA	10.1343	14.9926	15.4194	40.5463	0	3	0	FALSE	3	FALSE	FALSE
ENSMUST00000030187	ENSMUSG00000028465	Tln1	protein_coding	5861	cds	CCA	GAA	1844	-696	chr4	43538064	43538062	-	22854	NA	NA	NA	11.3973	13.2666	11.6821	36.346	0	3	0	FALSE	3	FALSE	FALSE
ENSMUST00000131374	ENSMUSG00000008683	Rps15a	protein_coding	253	cds	ACA	GGA	65	-65	chr7	118114801	118114799	-	30520	NA	NA	NA	10.3787	11.2972	12.527	34.203	0	3	0	FALSE	3	FALSE	TRUE
ENSMUST00000106588	ENSMUSG00000008683	Rps15a	protein_coding	406	cds	ACA	GGA	65	-65	chr7	118114803	118114801	-	30521	NA	NA	NA	10.0264	12.0825	11.6532	33.7622	0	3	0	FALSE	3	FALSE	FALSE
ENSMUST00000106590	ENSMUSG00000008683	Rps15a	protein_coding	508	cds	ACA	GGA	65	-42	chr7	118114803	118114801	-	30521	NA	NA	NA	12.753	11.653	12.4708	36.8768	0	3	0	FALSE	3	FALSE	FALSE
ENSMUST00000172457	ENSMUSG00000008683	Rps15a	protein_coding	210	cds	ACA	GGA	65	-65	chr7	118114803	118114801	-	30521	NA	NA	NA	10.9538	11.2064	11.1525	33.3128	0	3	0	FALSE	3	FALSE	FALSE
ENSMUST00000113249	ENSMUSG00000013736	Trnt1	protein_coding	687	cds	GGT	GAC	212	-222	chr6	106777945	106777947	+	28076	NA	NA	NA	14.3767	12	21.5189	47.8956	0	3	0	FALSE	3	FALSE	FALSE
ENSMUST00000113248	ENSMUSG00000013736	Trnt1	protein_coding	688	cds	GGT	GAC	212	-222	chr6	106777945	106777947	+	28076	NA	NA	NA	14.3767	12	21.1602	47.5369	0	3	0	FALSE	3	FALSE	FALSE
ENSMUST00000057578	ENSMUSG00000013736	Trnt1	protein_coding	753	cds	GGT	GAC	212	-222	chr6	106777945	106777947	+	28076	NA	NA	NA	14.3767	12	21.2416	47.6183	0	3	0	FALSE	3	FALSE	FALSE
ENSMUST00000114779	ENSMUSG00000029911	Ssbp1	protein_coding	423	cds	GGC	CTC	92	-56	chr6	40476797	40476799	+	27274	NA	NA	NA	13.7953	17.1297	12.9768	43.9018	0	3	0	FALSE	3	FALSE	FALSE
ENSMUST00000031971	ENSMUSG00000029911	Ssbp1	protein_coding	360	cds	GGC	CTC	92	-60	chr6	40476797	40476799	+	27274	NA	NA	NA	13.7953	17.1297	12.9768	43.9018	0	3	0	FALSE	3	FALSE	FALSE
ENSMUST00000121360	ENSMUSG00000029911	Ssbp1	protein_coding	918	cds	GGC	CTC	92	-56	chr6	40476797	40476799	+	27274	NA	NA	NA	13.7953	17.1297	12.9768	43.9018	0	3	0	FALSE	3	FALSE	FALSE
ENSMUST00000117411	ENSMUSG00000029911	Ssbp1	protein_coding	666	cds	GGC	CTC	92	-56	chr6	40476797	40476799	+	27274	NA	NA	NA	13.7953	17.1297	12.9768	43.9018	0	3	0	FALSE	3	FALSE	FALSE
ENSMUST00000113498	ENSMUSG00000064080	Fbln2	protein_coding	2265	cds	GGG	GAG	602	-572	chr6	91256341	91256343	+	27979	NA	NA	NA	14.5985	13.2586	16.1495	44.0066	0	3	0	FALSE	3	FALSE	FALSE
ENSMUST00000041544	ENSMUSG00000064080	Fbln2	protein_coding	2265	cds	GGG	GAG	602	-619	chr6	91256341	91256343	+	27979	NA	NA	NA	15.0758	13.6263	16.6045	45.3066	0	3	0	FALSE	3	FALSE	FALSE
ENSMUST00000037875	ENSMUSG00000027422	Rrbp1	protein_coding	1426	cds	GGG	GTA	380	-321	chr2	143989106	143989104	-	20146	NA	NA	NA	13.8078	10.1224	11.3605	35.2907	0	3	0	FALSE	3	FALSE	FALSE
ENSMUST00000016072	ENSMUSG00000027422	Rrbp1	protein_coding	3739	cds	GGC	TCT	1151	-313	chr2	143955002	143955000	-	20136	NA	NA	NA	25.727	10.4524	24.3653	60.5447	0	3	0	FALSE	3	FALSE	FALSE
ENSMUST00000001724	ENSMUSG00000001674	Ddx18	protein_coding	2070	cds	GCA	GAC	652	-8	chr1	121554023	121554021	-	1494	NA	NA	NA	11.8673	15.3624	15.3624	42.5922	0	3	0	FALSE	3	FALSE	TRUE
ENSMUST00000100015	ENSMUSG00000027108	Ola1	protein_coding	291	cds	AGC	AAG	81	-189	chr2	73203327	73203325	-	19130	NA	NA	NA	11.5792	13.5974	12	37.1766	0	3	0	FALSE	3	FALSE	FALSE
ENSMUST00000112055	ENSMUSG00000027108	Ola1	protein_coding	243	cds	AGC	AAG	81	-200	chr2	73203327	73203325	-	19130	NA	NA	NA	10.8397	13.5974	12	36.437	0	3	0	FALSE	3	FALSE	FALSE
ENSMUST00000046709	ENSMUSG00000035726	Supt16	protein_coding	2759	cds	CCC	TTT	831	-216	chr14	52164542	52164540	-	10911	NA	NA	NA	15.4746	14.4338	17.7932	47.7016	0	3	0	FALSE	3	FALSE	FALSE
ENSMUST00000100134	ENSMUSG00000025156	Gps1	protein_coding	1567	3utr	NA	NA	1531	59	chr11	120788739	120788741	+	7553	NA	NA	NA	18.2885	12.1488	11.2802	41.7175	0	3	0	FALSE	3	FALSE	TRUE
ENSMUST00000031668	ENSMUSG00000029661	Col1a2	protein_coding	1799	cds	CCA	ATC	484	-888	chr6	4522985	4522987	+	26788	NA	NA	NA	17.9363	21.9363	22.2724	62.1449	0	3	0	FALSE	3	FALSE	TRUE
ENSMUST00000031668	ENSMUSG00000029661	Col1a2	protein_coding	2075	cds	GGA	GAA	576	-796	chr6	4524920	4524922	+	26797	NA	NA	NA	11.8131	10.2173	12.3116	34.342	0	3	0	FALSE	3	FALSE	TRUE
ENSMUST00000085679	ENSMUSG00000029622	Arpc1b	protein_coding	1118	cds	CAC	AAG	324	-48	chr5	145126915	145126917	+	26636	NA	NA	NA	11.1559	11.0605	15.0593	37.2757	0	3	0	FALSE	3	FALSE	TRUE
ENSMUST00000025541	ENSMUSG00000024639	Gnaq	protein_coding	912	cds	GGA	ATC	138	-220	chr19	16316112	16316114	+	17591	NA	NA	NA	16.2091	13.1762	17.4831	46.8684	0	3	0	FALSE	3	FALSE	FALSE
ENSMUST00000075190	ENSMUSG00000031673	Cdh11	protein_coding	3146	cds	CCT	AGA	703	-93	chr8	102634065	102634063	-	32525	NA	NA	NA	10.948	12.7083	11.9501	35.6064	0	3	0	FALSE	3	FALSE	TRUE
ENSMUST00000023210	ENSMUSG00000022551	Cyc1	protein_coding	893	cds	CGA	AAA	283	-41	chr15	76345556	76345558	+	11954	NA	NA	NA	12.0077	24.3395	18.2997	54.6469	0	3	0	FALSE	3	FALSE	FALSE
ENSMUST00000117373	ENSMUSG00000027750	Postn	protein_coding	1867	cds	AAA	GAA	611	-172	chr3	54376946	54376948	+	21059	NA	NA	NA	17.4068	11.6456	14.4935	43.5459	0	3	0	FALSE	3	FALSE	FALSE
ENSMUST00000107985	ENSMUSG00000027750	Postn	protein_coding	1867	cds	AAA	GAA	611	-199	chr3	54376946	54376948	+	21059	NA	NA	NA	17.8535	11.9345	14.8812	44.6692	0	3	0	FALSE	3	FALSE	FALSE
ENSMUST00000073012	ENSMUSG00000027750	Postn	protein_coding	1851	cds	AAA	GAA	611	-200	chr3	54376946	54376948	+	21059	NA	NA	NA	17.8032	11.9244	14.8526	44.5801	0	3	0	FALSE	3	FALSE	FALSE
ENSMUST00000154841	ENSMUSG00000027613	Eif6	nonsense_mediated_decay	474	3utr	NA	NA	470	291	chr2	155820107	155820105	-	20367	30.6186	40.8094	41.9877	49.398	22.0803	30.9217	102.4	113.416	3	3	FALSE	0	TRUE	TRUE
ENSMUST00000154841	ENSMUSG00000027613	Eif6	nonsense_mediated_decay	475	3utr	NA	NA	471	292	chr2	155820106	155820104	-	20366	120.585	96.4334	187.249	122.617	85.0537	122.435	330.106	404.268	3	3	FALSE	0	TRUE	TRUE
ENSMUST00000138091	ENSMUSG00000027893	Ahcyl1	nonsense_mediated_decay	1297	3utr	NA	NA	1296	749	chr3	107665112	107665110	-	22076	34.1688	29.7495	55.4256	26.0024	26.5821	39.8012	92.3857	119.344	3	3	FALSE	0	TRUE	TRUE
ENSMUST00000102811	ENSMUSG00000038900	Rpl12	nonsense_mediated_decay	312	cds	CGA	NA	83	-1	chr2	32962590	32962592	+	18779	16.9047	16.2539	25.9233	19.4214	19.0853	19.5489	58.0555	59.082	3	3	TRUE	0	TRUE	TRUE
ENSMUST00000102811	ENSMUSG00000038900	Rpl12	nonsense_mediated_decay	530	3utr	NA	NA	466	212	chr2	32963550	32963552	+	18797	15.2797	25.5712	13.7587	10.7864	12.9138	13.3449	37.0451	54.6096	3	3	FALSE	0	TRUE	TRUE
ENSMUST00000102811	ENSMUSG00000038900	Rpl12	nonsense_mediated_decay	677	3utr	NA	NA	613	359	chr2	32963991	32963993	+	18804	31.0062	26.6356	44.8963	50.2899	22.6482	32.839	105.777	102.538	3	3	FALSE	0	TRUE	TRUE
ENSMUST00000164980	ENSMUSG00000004530	Coro1c	nonsense_mediated_decay	562	cds	ACC	AAT	154	-5	chr5	113848618	113848616	-	25633	29.473	24.007	36.9562	43.5636	16.3299	29.2913	89.1848	90.4361	3	3	FALSE	0	TRUE	TRUE
ENSMUST00000136278	ENSMUSG00000028641	P3h1	nonsense_mediated_decay	1239	3utr	NA	NA	1235	144	chr4	119241482	119241484	+	23619	15.2122	18.6462	23.8589	18.3949	11.9048	32.9219	63.2216	57.7173	3	3	FALSE	0	TRUE	TRUE
ENSMUST00000136278	ENSMUSG00000028641	P3h1	nonsense_mediated_decay	2029	3utr	NA	NA	2025	934	chr4	119246727	119246729	+	23622	27.0083	39.973	57.2024	42.2048	14.8844	43.1504	100.24	124.184	3	3	FALSE	0	TRUE	TRUE
ENSMUST00000136278	ENSMUSG00000028641	P3h1	nonsense_mediated_decay	2423	3utr	NA	NA	2419	1328	chr4	119248042	119248044	+	23630	22.845	23.9067	37.2026	16.4643	12.898	24.3981	53.7605	83.9542	3	3	FALSE	0	TRUE	TRUE
ENSMUST00000145331	ENSMUSG00000018362	Kpna2	nonsense_mediated_decay	1535	3utr	NA	NA	1450	1223	chr11	106988937	106988935	-	7078	11.463	18.2078	26.9826	18.1461	13.2087	21.6564	53.0111	56.6533	3	3	FALSE	0	TRUE	TRUE
ENSMUST00000188762	ENSMUSG00000038252	Ncapd2	nonsense_mediated_decay	664	3utr	NA	NA	538	254	chr6	125185722	125185720	-	28416	48.4634	22.4952	83.3322	67.6174	52.0902	81.9837	201.691	154.291	3	3	FALSE	0	TRUE	TRUE
ENSMUST00000172696	ENSMUSG00000037894	H2az1	nonsense_mediated_decay	173	3utr	NA	NA	172	8	chr3	137866026	137866028	+	22367	12.1965	11.5827	13.5797	18.6886	13.5473	16.8532	49.0891	37.3588	3	3	FALSE	0	TRUE	TRUE
ENSMUST00000186985	ENSMUSG00000026193	Fn1	nonsense_mediated_decay	448	3utr	NA	NA	447	246	chr1	71599687	71599685	-	755	67.8793	48.8781	110.736	32.8813	22.2945	41.9167	97.0925	227.493	3	3	FALSE	0	TRUE	TRUE
ENSMUST00000186613	ENSMUSG00000026193	Fn1	nonsense_mediated_decay	27	cds	CCG	GAA	9	-61	chr1	71641262	71641260	-	917	19.394	15.1794	24.3179	20.7883	24.1131	27.4824	72.3838	58.8912	3	3	FALSE	0	TRUE	TRUE
ENSMUST00000133316	ENSMUSG00000029177	Cenpa	nonsense_mediated_decay	132	cds	ATG	GGC	0	-42	chr5	30666908	30666910	+	24737	10.709	15.7333	24.817	25.5082	15.0337	26.7909	67.3328	51.2593	3	3	TRUE	0	TRUE	TRUE
ENSMUST00000151254	ENSMUSG00000030663	1110004F10Rik	nonsense_mediated_decay	654	3utr	NA	NA	556	311	chr7	116104434	116104436	+	30488	22.5096	43.5194	39.1335	51.0883	13.9998	32.8541	97.9422	105.162	3	3	FALSE	0	TRUE	TRUE
ENSMUST00000151254	ENSMUSG00000030663	1110004F10Rik	nonsense_mediated_decay	655	3utr	NA	NA	557	312	chr7	116104435	116104437	+	30489	17.6722	16.2681	25.1206	27.3196	19.357	43.5024	90.179	59.0609	3	3	FALSE	0	TRUE	TRUE
ENSMUST00000176896	ENSMUSG00000032336	Nptn	nonsense_mediated_decay	718	3utr	NA	NA	717	54	chr9	58651313	58651315	+	33999	20.5935	18.3536	21.5578	17.8678	11.9602	22.7392	52.5672	60.5048	3	3	FALSE	0	TRUE	TRUE
ENSMUST00000124826	ENSMUSG00000025809	Itgb1	nonsense_mediated_decay	629	3utr	NA	NA	425	249	chr8	128714028	128714030	+	33014	19.8833	23.9912	18.6768	15.0914	17.9393	14.8745	47.9051	62.5513	3	3	FALSE	0	TRUE	TRUE
ENSMUST00000124826	ENSMUSG00000025809	Itgb1	nonsense_mediated_decay	665	3utr	NA	NA	461	285	chr8	128714064	128714066	+	33018	45.4052	39.1551	38.444	49.3771	20.2324	45.3582	114.968	123.004	3	3	FALSE	0	TRUE	TRUE
ENSMUST00000124826	ENSMUSG00000025809	Itgb1	nonsense_mediated_decay	803	3utr	NA	NA	599	423	chr8	128716158	128716160	+	33023	25.6865	23.6807	32.992	23.3536	12.9657	27.1466	63.4658	82.3592	3	3	FALSE	0	TRUE	TRUE
ENSMUST00000124826	ENSMUSG00000025809	Itgb1	nonsense_mediated_decay	1106	3utr	NA	NA	902	726	chr8	128717672	128717674	+	33041	29.225	37.36	47.4101	35.405	15.6026	36.2771	87.2847	113.995	3	3	FALSE	0	TRUE	TRUE
ENSMUST00000124826	ENSMUSG00000025809	Itgb1	nonsense_mediated_decay	1773	3utr	NA	NA	1569	1393	chr8	128722894	128722896	+	33078	23.9593	22.3286	21.0399	14.3698	14.6901	23.6758	52.7357	67.3279	3	3	FALSE	0	TRUE	TRUE
ENSMUST00000141169	ENSMUSG00000020485	Supt4a	nonsense_mediated_decay	485	3utr	NA	NA	437	174	chr11	87743309	87743311	+	6225	26.0019	19.6622	28.1831	23.8703	12.5127	25.302	61.685	73.8471	3	3	FALSE	0	TRUE	TRUE
ENSMUST00000148351	ENSMUSG00000002319	Ipo4	nonsense_mediated_decay	771	3utr	NA	NA	737	441	chr14	55633098	55633096	-	11046	13.2309	11.8323	12.19	26.3536	16.2347	20.0692	62.6576	37.2532	3	3	FALSE	0	TRUE	TRUE
ENSMUST00000127610	ENSMUSG00000020790	Ankfy1	nonsense_mediated_decay	3375	3utr	NA	NA	3355	2036	chr11	72764797	72764799	+	5755	16.836	22.663	20.0227	30.6074	30.1201	17.8897	78.6173	59.5217	3	3	FALSE	0	TRUE	TRUE
ENSMUST00000143865	ENSMUSG00000025340	Rabgef1	nonsense_mediated_decay	60	cds	AGG	NA	20	-1	chr5	130213225	130213227	+	26030	18.8668	25.983	23.0341	26.4518	19	17.5818	63.0337	67.8839	3	3	TRUE	0	TRUE	TRUE
ENSMUST00000187832	ENSMUSG00000060036	Rpl3	nonsense_mediated_decay	566	3utr	NA	NA	558	16	chr15	80081018	80081016	-	12297	12.7143	13.924	12.15	26.1066	12.6947	19.0725	57.8738	38.7883	3	3	FALSE	0	TRUE	TRUE
ENSMUST00000147842	ENSMUSG00000032320	Rcn2	nonsense_mediated_decay	1161	3utr	NA	NA	953	738	chr9	56058206	56058208	+	33901	53.3458	68.8752	71.3359	53.327	16.0034	47.4565	116.787	193.557	3	3	FALSE	0	TRUE	TRUE
ENSMUST00000166766	ENSMUSG00000018040	Rrp7a	nonsense_mediated_decay	147	cds	CTA	NA	49	-1	chr15	83116893	83116891	-	12440	39.508	31.2783	36.949	25.0011	21.4551	35.8659	82.3221	107.735	3	3	TRUE	0	TRUE	TRUE
ENSMUST00000170828	ENSMUSG00000079435	Rpl36a	nonsense_mediated_decay	171	cds	GTG	GGC	48	-19	chrX	134586546	134586548	+	36758	14.1555	13.2549	17.2526	14.7924	14.1181	24.4151	53.3256	44.6631	3	3	FALSE	0	TRUE	TRUE
ENSMUST00000170828	ENSMUSG00000079435	Rpl36a	nonsense_mediated_decay	342	3utr	NA	NA	314	111	chrX	134587952	134587954	+	36763	19.6428	44.3731	17.2638	27.5928	20.1567	11.8731	59.6225	81.2797	3	3	FALSE	0	TRUE	TRUE
ENSMUST00000155638	ENSMUSG00000014313	Cox6c	nonsense_mediated_decay	27	cds	AGT	NA	9	-1	chr15	35935305	35935303	-	11663	57.8282	55.061	71.1964	49.0188	28.4609	54.4149	131.894	184.086	3	3	TRUE	0	TRUE	TRUE
ENSMUST00000022590	ENSMUSG00000022013	Dnajc15	nonsense_mediated_decay	226	cds	ATG	GCT	0	-44	chr14	77852918	77852916	-	11301	16.8096	14.3139	14.4291	13.5295	11.8885	13.1566	38.5746	45.5526	3	3	TRUE	0	TRUE	TRUE
ENSMUST00000124289	ENSMUSG00000026553	Copa	nonsense_mediated_decay	282	cds	CTG	CCT	59	-19	chr1	172090961	172090963	+	2066	18.8745	20.0221	20.5093	29.5558	17.029	21.2869	67.8717	59.4058	3	3	FALSE	0	TRUE	TRUE
ENSMUST00000144429	ENSMUSG00000031328	Flna	nonsense_mediated_decay	246	cds	AAG	ACC	82	-428	chrX	74246153	74246151	-	36322	48.2082	42.6433	55.8105	60.9985	11.9446	38.0814	111.025	146.662	3	3	FALSE	0	TRUE	TRUE
ENSMUST00000144429	ENSMUSG00000031328	Flna	nonsense_mediated_decay	765	cds	GCT	GAA	255	-255	chrX	74242557	74242555	-	36301	12.4405	14.2061	17.7305	19.6733	21.9203	24.4135	66.0071	44.377	3	3	FALSE	0	TRUE	TRUE
ENSMUST00000144429	ENSMUSG00000031328	Flna	nonsense_mediated_decay	1044	cds	TGG	CCA	348	-162	chrX	74241533	74241531	-	36289	23.7948	19.0078	27.1383	16.1927	21.3612	21.1514	58.7054	69.9409	3	3	FALSE	0	TRUE	TRUE
ENSMUST00000144429	ENSMUSG00000031328	Flna	nonsense_mediated_decay	1590	3utr	NA	NA	1589	56	chrX	74240266	74240264	-	36271	21.4207	21.9092	30.1895	27.484	14.5088	22.9482	64.941	73.5194	3	3	FALSE	0	TRUE	TRUE
ENSMUST00000144429	ENSMUSG00000031328	Flna	nonsense_mediated_decay	3027	3utr	NA	NA	3026	1493	chrX	74236883	74236881	-	36241	12.8417	11.1294	23.9558	32.6451	11.3036	30.2788	74.2275	47.9268	3	3	FALSE	0	TRUE	TRUE
ENSMUST00000144429	ENSMUSG00000031328	Flna	nonsense_mediated_decay	3354	3utr	NA	NA	3353	1820	chrX	74236031	74236029	-	36234	27.0817	53.9806	13.2079	56.8707	12.9062	32.4733	102.25	94.2702	3	3	FALSE	0	TRUE	TRUE
ENSMUST00000128880	ENSMUSG00000036737	Oxsr1	nonsense_mediated_decay	1956	3utr	NA	NA	1707	1366	chr9	119241147	119241145	-	35316	33.8448	54.7627	18.351	28.5605	25.4426	13.0963	67.0995	106.958	3	3	FALSE	0	TRUE	TRUE
ENSMUST00000184020	ENSMUSG00000032216	Nedd4	nonsense_mediated_decay	433	3utr	NA	NA	432	342	chr9	72747223	72747225	+	34425	87.2199	145.894	83.6295	171.488	66.3925	117.089	354.97	316.744	3	3	FALSE	0	TRUE	TRUE
ENSMUST00000185118	ENSMUSG00000038671	Arfrp1	nonsense_mediated_decay	183	cds	GAT	GAA	15	-106	chr2	181364653	181364651	-	20743	14.1248	19.6337	13.6004	18.6578	13.0824	15.0735	46.8137	47.3589	3	3	FALSE	0	TRUE	TRUE
ENSMUST00000133426	ENSMUSG00000020719	Ddx5	nonsense_mediated_decay	3286	3utr	NA	NA	3107	1887	chr11	106781855	106781853	-	7035	44.6173	44.4372	71.0295	63.2283	26.5728	65.2047	155.006	160.084	3	3	FALSE	0	TRUE	TRUE
ENSMUST00000147627	ENSMUSG00000074643	Cpne1	nonsense_mediated_decay	1711	3utr	NA	NA	1633	581	chr2	156073525	156073523	-	20393	21.2864	17.3505	16.4071	28.6602	11.3294	20.1326	60.1222	55.0441	3	3	FALSE	0	TRUE	TRUE
ENSMUST00000142558	ENSMUSG00000006728	Cdk4	nonsense_mediated_decay	500	3utr	NA	NA	332	108	chr10	127064949	127064951	+	3948	23.9676	23.4836	30.1084	17.242	13.1433	34.4241	64.8094	77.5597	3	3	FALSE	0	TRUE	TRUE
ENSMUST00000193168	ENSMUSG00000039221	Rpl22l1	nonsense_mediated_decay	456	3utr	NA	NA	430	236	chr3	28807326	28807328	+	20866	68.7579	78.3283	84.4876	101.056	80.4999	101.327	282.882	231.574	3	3	FALSE	0	TRUE	TRUE
ENSMUST00000193168	ENSMUSG00000039221	Rpl22l1	nonsense_mediated_decay	457	3utr	NA	NA	431	237	chr3	28807327	28807329	+	20867	48.9062	54.7346	82.6905	59.8995	33.5444	69.8827	163.327	186.331	3	3	FALSE	0	TRUE	TRUE
ENSMUST00000178254	ENSMUSG00000018293	Pfn1	nonsense_mediated_decay	534	3utr	NA	NA	392	225	chr11	70652129	70652127	-	5652	59.9419	72.3384	56.5276	39.7885	28.4534	29.9949	98.2368	188.808	3	3	FALSE	0	TRUE	TRUE
ENSMUST00000123101	ENSMUSG00000022443	Myh9	nonsense_mediated_decay	1120	3utr	NA	NA	1009	647	chr15	77790812	77790810	-	12097	36.7474	54.2827	34.5339	49.8475	10.0757	30.8228	90.746	125.564	3	3	FALSE	0	TRUE	TRUE
ENSMUST00000171423	ENSMUSG00000024659	Anxa1	nonsense_mediated_decay	164	cds	ATG	GCA	0	-302	chr19	20384561	20384559	-	17633	51.1891	69.9449	61.2869	65.5014	13.4451	37.4649	116.411	182.421	3	3	TRUE	0	TRUE	TRUE
ENSMUST00000154007	ENSMUSG00000028618	Tmem59	nonsense_mediated_decay	708	3utr	NA	NA	704	432	chr4	107197609	107197611	+	23418	26.4341	31.9728	13.77	49.8205	11.9213	20.0109	81.7527	72.1769	3	3	FALSE	0	TRUE	TRUE
ENSMUST00000174372	ENSMUSG00000028645	Slc2a1	nonsense_mediated_decay	41	cds	ATG	GAT	0	-173	chr4	119120413	119120415	+	23602	25.8631	35.1713	22.7795	33.5707	20.5382	42.0551	96.164	83.8138	3	3	TRUE	0	TRUE	TRUE
ENSMUST00000174096	ENSMUSG00000029767	Calu	nonsense_mediated_decay	629	3utr	NA	NA	628	203	chr6	29366059	29366061	+	27036	18.138	21.2457	26.4023	28.8619	14.8933	21.8479	65.6031	65.786	3	3	FALSE	0	TRUE	TRUE
ENSMUST00000173987	ENSMUSG00000077450	Rab11b	nonsense_mediated_decay	665	3utr	NA	NA	646	197	chr17	33747673	33747671	-	14870	15.4032	27.5514	17.9817	25.4036	10.7746	14.6563	50.8346	60.9363	3	3	FALSE	0	TRUE	TRUE
ENSMUST00000172013	ENSMUSG00000005262	Ufd1	nonsense_mediated_decay	114	cds	ATG	TTT	0	-58	chr16	18811937	18811939	+	13271	36.2613	37.9671	30.9137	35.0457	28.6667	25.4496	89.162	105.142	3	3	TRUE	0	TRUE	TRUE
ENSMUST00000146506	ENSMUSG00000002102	Psmc3	nonsense_mediated_decay	396	cds	AGG	AGA	132	-70	chr2	91055697	91055699	+	19353	26.7755	27.5269	36.4098	31.8095	16.3454	27.0479	75.2027	90.7122	3	3	FALSE	0	TRUE	TRUE
ENSMUST00000024823	ENSMUSG00000024026	Glo1	nonsense_mediated_decay	61	cds	ATG	GCA	0	-109	chr17	30612599	30612597	-	14830	34.7072	38.3809	36.7885	37.3333	14.2887	18.5062	70.1282	109.877	3	3	TRUE	0	TRUE	TRUE
ENSMUST00000187733	ENSMUSG00000026219	Trip12	nonsense_mediated_decay	741	3utr	NA	NA	740	639	chr1	84724701	84724699	-	1137	14.0843	14.1857	21.0098	12.8112	15.9835	11.8958	40.6905	49.2799	3	3	FALSE	0	TRUE	TRUE
ENSMUST00000027108	ENSMUSG00000025967	Eef1b2	nonsense_mediated_decay	781	3utr	NA	NA	713	567	chr1	63179601	63179603	+	661	21.5857	18.5176	28.7845	19.4679	16.4754	28.2134	64.1568	68.8878	3	3	FALSE	0	TRUE	TRUE
ENSMUST00000130032	ENSMUSG00000032185	Carm1	nonsense_mediated_decay	2053	3utr	NA	NA	2022	1534	chr9	21588184	21588186	+	33285	11.3623	17.8184	23.1407	12.5096	13.2122	40.3787	66.1005	52.3214	3	3	FALSE	0	TRUE	TRUE
ENSMUST00000116595	ENSMUSG00000036309	Skp1a	nonsense_mediated_decay	579	3utr	NA	NA	578	426	chr11	52245101	52245103	+	5072	17.166	23.2788	22.1743	18.2036	11.248	36.2844	65.7361	62.6192	3	3	FALSE	0	TRUE	TRUE
ENSMUST00000135949	ENSMUSG00000062070	Pgk1	nonsense_mediated_decay	1044	3utr	NA	NA	955	188	chrX	106200316	106200318	+	36708	25.5506	32.4246	40.6238	30.0672	11.6331	36.8961	78.5963	98.5989	3	3	FALSE	0	TRUE	TRUE
ENSMUST00000135949	ENSMUSG00000062070	Pgk1	nonsense_mediated_decay	1377	3utr	NA	NA	1288	521	chrX	106203274	106203276	+	36720	27.8654	40.1247	22.537	31.1912	12.665	16.0381	59.8943	90.527	3	3	FALSE	0	TRUE	TRUE
ENSMUST00000153377	ENSMUSG00000038503	Mesd	nonsense_mediated_decay	1030	3utr	NA	NA	1029	797	chr7	83898001	83898003	+	29941	21.8456	15.1433	30	14.6241	29.0496	42.9272	86.6009	66.9889	3	3	FALSE	0	TRUE	TRUE
ENSMUST00000179939	ENSMUSG00000029467	Atp2a2	nonsense_mediated_decay	1257	cds	GGG	GAG	256	-788	chr5	122469728	122469726	-	25888	24.1447	42.7631	36.4783	36.2997	24.1877	35.2918	95.7792	103.386	3	3	FALSE	0	TRUE	TRUE
ENSMUST00000191578	ENSMUSG00000026341	Actr3	nonsense_mediated_decay	374	3utr	NA	NA	220	95	chr1	125408606	125408604	-	1540	10.594	22.1197	10.1621	24.9457	10.709	13.6121	49.2668	42.8758	3	3	FALSE	0	TRUE	TRUE
ENSMUST00000191578	ENSMUSG00000026341	Actr3	nonsense_mediated_decay	539	3utr	NA	NA	385	260	chr1	125407321	125407319	-	1534	30.8577	22.0818	39.4463	46.6873	26.0165	47.6539	120.358	92.3858	3	3	FALSE	0	TRUE	TRUE
ENSMUST00000191578	ENSMUSG00000026341	Actr3	nonsense_mediated_decay	1115	3utr	NA	NA	961	836	chr1	125395142	125395140	-	1510	12.5882	16.33	10.3503	19.4326	12.3898	10.497	42.3194	39.2685	3	3	FALSE	0	TRUE	TRUE
ENSMUST00000191578	ENSMUSG00000026341	Actr3	nonsense_mediated_decay	1280	3utr	NA	NA	1126	1001	chr1	125394000	125393998	-	1505	16.9136	39.6889	15.162	26.9259	12.8948	17.3925	57.2133	71.7645	3	3	FALSE	0	TRUE	TRUE
ENSMUST00000129935	ENSMUSG00000037805	Rpl10a	nonsense_mediated_decay	894	3utr	NA	NA	863	687	chr17	28330977	28330979	+	14735	18.4412	12.5396	28.7277	19.6077	13.8576	29.5364	63.0018	59.7085	3	3	FALSE	0	TRUE	TRUE
ENSMUST00000131103	ENSMUSG00000062825	Actg1	nonsense_mediated_decay	495	3utr	NA	NA	423	25	chr11	120347334	120347332	-	7420	37.5622	24.6116	65.7354	26.4022	12.4766	49.6138	88.4927	127.909	3	3	FALSE	0	TRUE	TRUE
ENSMUST00000131103	ENSMUSG00000062825	Actg1	nonsense_mediated_decay	609	3utr	NA	NA	537	139	chr11	120347220	120347218	-	7402	23.8647	21.2596	27.7113	41.0209	20.7215	16.56	78.3024	72.8356	3	3	FALSE	0	TRUE	TRUE
ENSMUST00000131103	ENSMUSG00000062825	Actg1	nonsense_mediated_decay	612	3utr	NA	NA	540	142	chr11	120347217	120347215	-	7400	60.8987	83.2438	64.5474	67.017	60.9032	69.585	197.505	208.69	3	3	FALSE	0	TRUE	TRUE
ENSMUST00000131103	ENSMUSG00000062825	Actg1	nonsense_mediated_decay	675	3utr	NA	NA	603	205	chr11	120347154	120347152	-	7391	61.1153	32.2023	65.4421	50.3477	16.836	61.4059	128.59	158.76	3	3	FALSE	0	TRUE	TRUE
ENSMUST00000131103	ENSMUSG00000062825	Actg1	nonsense_mediated_decay	777	3utr	NA	NA	705	307	chr11	120347052	120347050	-	7382	35.8985	34.6109	58.4734	46.4295	25.2704	62.7298	134.43	128.983	3	3	FALSE	0	TRUE	TRUE
ENSMUST00000131103	ENSMUSG00000062825	Actg1	nonsense_mediated_decay	843	3utr	NA	NA	771	373	chr11	120346986	120346984	-	7373	11.0669	16.9985	22.0991	20.4313	13.7086	22.8053	56.9453	50.1646	3	3	FALSE	0	TRUE	TRUE
ENSMUST00000131103	ENSMUSG00000062825	Actg1	nonsense_mediated_decay	846	3utr	NA	NA	774	376	chr11	120346983	120346981	-	7371	22.2812	27.2251	19.0786	35.9183	20.1529	36.7861	92.8572	68.5849	3	3	FALSE	0	TRUE	TRUE
ENSMUST00000131103	ENSMUSG00000062825	Actg1	nonsense_mediated_decay	1017	3utr	NA	NA	945	547	chr11	120346720	120346718	-	7356	47.4182	47.3364	53.3568	38.3742	25.0972	44.8708	108.342	148.111	3	3	FALSE	0	TRUE	TRUE
ENSMUST00000131103	ENSMUSG00000062825	Actg1	nonsense_mediated_decay	1020	3utr	NA	NA	948	550	chr11	120346717	120346715	-	7354	38.9671	50.7131	45.491	32.1053	42.5044	34.7383	109.348	135.171	3	3	FALSE	0	TRUE	TRUE
ENSMUST00000131103	ENSMUSG00000062825	Actg1	nonsense_mediated_decay	1021	3utr	NA	NA	949	551	chr11	120346716	120346714	-	7353	26.2863	21.0891	46.3914	19.7472	33.1361	26.9131	79.7964	93.7669	3	3	FALSE	0	TRUE	TRUE
ENSMUST00000131103	ENSMUSG00000062825	Actg1	nonsense_mediated_decay	1023	3utr	NA	NA	951	553	chr11	120346714	120346712	-	7351	41.2382	39.3418	12.4797	41.8129	67.1313	74.9378	183.882	93.0596	3	3	FALSE	0	TRUE	TRUE
ENSMUST00000131103	ENSMUSG00000062825	Actg1	nonsense_mediated_decay	1170	3utr	NA	NA	1098	700	chr11	120346464	120346462	-	7331	56.5936	54.6327	80.3826	57.8115	43.0868	64.5315	165.43	191.609	3	3	FALSE	0	TRUE	TRUE
ENSMUST00000156889	ENSMUSG00000014301	Pam16	nonsense_mediated_decay	343	3utr	NA	NA	259	140	chr16	4616552	4616550	-	13040	42.0648	63.8158	48.1677	85	66.4985	68.6214	220.12	154.048	3	3	FALSE	0	TRUE	TRUE
ENSMUST00000163966	ENSMUSG00000023944	Hsp90ab1	nonsense_mediated_decay	377	cds	GCA	CGA	96	-16	chr17	45571442	45571440	-	15322	12.4506	19.3368	14.8417	15.7084	10.7417	12.5401	38.9902	46.6292	3	3	FALSE	0	TRUE	TRUE
ENSMUST00000163966	ENSMUSG00000023944	Hsp90ab1	nonsense_mediated_decay	524	3utr	NA	NA	434	96	chr17	45571060	45571058	-	15313	15.0983	19.1452	10.0961	34.2444	15.784	19.5396	69.5679	44.3395	3	3	FALSE	0	TRUE	TRUE
ENSMUST00000163966	ENSMUSG00000023944	Hsp90ab1	nonsense_mediated_decay	599	3utr	NA	NA	509	171	chr17	45570767	45570765	-	15308	12.7096	14.8218	22.0728	19.5346	10.4166	18.879	48.8303	49.6043	3	3	FALSE	0	TRUE	TRUE
ENSMUST00000163966	ENSMUSG00000023944	Hsp90ab1	nonsense_mediated_decay	659	3utr	NA	NA	569	231	chr17	45570707	45570705	-	15305	21.6671	12.2278	30.9823	28.7617	23.4849	44.4744	96.721	64.8772	3	3	FALSE	0	TRUE	TRUE
ENSMUST00000168902	ENSMUSG00000000753	Serpinf1	nonsense_mediated_decay	901	3utr	NA	NA	893	726	chr11	75410139	75410137	-	5798	15.0721	38.7453	18.3988	30.9931	22.0407	18.0754	71.1092	72.2161	3	3	FALSE	0	TRUE	TRUE
ENSMUST00000154050	ENSMUSG00000026843	Fubp3	nonsense_mediated_decay	292	cds	NA	NA	83	0	chr2	31594872	31594874	+	18699	31.3418	33.3277	53.2986	43.3207	14.6589	51.7403	109.72	117.968	3	3	FALSE	0	TRUE	TRUE
ENSMUST00000162360	ENSMUSG00000038690	Atp5j2	nonsense_mediated_decay	469	3utr	NA	NA	391	134	chr5	145183844	145183842	-	26650	23.974	87.8416	21.6304	40.4208	35.6299	26.4618	102.513	133.446	3	3	FALSE	0	TRUE	TRUE
ENSMUST00000149918	ENSMUSG00000068335	Dok1	nonsense_mediated_decay	1650	3utr	NA	NA	1611	1483	chr6	83031256	83031254	-	27617	23.1682	20.6721	11.8436	19.6194	10.4406	31.7239	61.7839	55.6839	3	3	FALSE	0	TRUE	TRUE
ENSMUST00000139287	ENSMUSG00000021326	Trim27	nonsense_mediated_decay	542	3utr	NA	NA	541	358	chr13	21192417	21192419	+	8884	46.3663	42.8709	22.0956	67.4111	40.8864	39.5951	147.893	111.333	3	3	FALSE	0	TRUE	TRUE
ENSMUST00000162711	ENSMUSG00000021024	Psma6	nonsense_mediated_decay	561	3utr	NA	NA	439	278	chr12	55412312	55412314	+	7942	23.1523	11.2475	32.4828	26.5393	15.9185	26.7986	69.2564	66.8826	3	3	FALSE	0	TRUE	TRUE
ENSMUST00000162711	ENSMUSG00000021024	Psma6	nonsense_mediated_decay	762	3utr	NA	NA	640	479	chr12	55418289	55418291	+	7948	32.5759	40.002	43.6921	29.4285	34.0952	21.9855	85.5092	116.27	3	3	FALSE	0	TRUE	TRUE
ENSMUST00000147570	ENSMUSG00000027404	Snrpb	nonsense_mediated_decay	799	3utr	NA	NA	631	419	chr2	130173087	130173085	-	20023	11.6747	11.9785	19.794	15.7359	11.0496	19.3456	46.1311	43.4472	3	3	FALSE	0	TRUE	TRUE
ENSMUST00000147570	ENSMUSG00000027404	Snrpb	nonsense_mediated_decay	982	3utr	NA	NA	814	602	chr2	130171938	130171936	-	20017	135.366	111.245	172.149	129.093	52.7368	137.025	318.855	418.76	3	3	FALSE	0	TRUE	TRUE
ENSMUST00000147570	ENSMUSG00000027404	Snrpb	nonsense_mediated_decay	983	3utr	NA	NA	815	603	chr2	130171937	130171935	-	20016	22.2739	14.6055	44.5198	17.5496	15.4844	25.5973	58.6313	81.3992	3	3	FALSE	0	TRUE	TRUE
ENSMUST00000133320	ENSMUSG00000000563	Atp5pb	nonsense_mediated_decay	1022	3utr	NA	NA	932	753	chr3	105942991	105942989	-	22034	53.2392	57.3941	65.5009	55.1322	31.7983	39.164	126.095	176.134	3	3	FALSE	0	TRUE	TRUE
ENSMUST00000057343	ENSMUSG00000006498	Ptbp1	nonsense_mediated_decay	1613	3utr	NA	NA	1550	489	chr10	79863272	79863274	+	3125	24.979	73.0344	16.6957	44.4664	25.3453	25.9798	95.7915	114.709	3	3	FALSE	0	TRUE	TRUE
ENSMUST00000186388	ENSMUSG00000019818	Cd164	nonsense_mediated_decay	455	cds	AAC	CAT	42	-2	chr10	41523196	41523198	+	2700	18.6978	16.0736	17.9768	11.68	11.9037	10.8461	34.4298	52.7482	3	3	TRUE	0	TRUE	TRUE
ENSMUST00000141191	ENSMUSG00000036632	Alg5	nonsense_mediated_decay	993	3utr	NA	NA	967	713	chr3	54749339	54749341	+	21075	22.2091	17.7087	20.9641	10.4058	10.2062	16.5262	37.1381	60.882	3	3	FALSE	0	TRUE	TRUE
ENSMUST00000174882	ENSMUSG00000015165	Hnrnpl	nonsense_mediated_decay	1502	3utr	NA	NA	1501	896	chr7	28821901	28821903	+	29248	119.99	151.185	176.164	204.835	143.389	208.965	557.189	447.339	3	3	FALSE	0	TRUE	TRUE
ENSMUST00000126788	ENSMUSG00000022841	Ap2m1	nonsense_mediated_decay	49	cds	ATG	ATC	0	-82	chr16	20540025	20540027	+	13300	53.8671	43.5183	70.4985	56.6427	43.6658	55.6606	155.969	167.884	3	3	TRUE	0	TRUE	TRUE
ENSMUST00000154270	ENSMUSG00000030208	Emp1	nonsense_mediated_decay	159	5utr	NA	NA	-47	-172	chr6	135363089	135363091	+	28528	14.3624	12.3574	22.2179	11.1454	17.9763	16.9736	46.0953	48.9378	3	3	FALSE	0	TRUE	TRUE
ENSMUST00000154270	ENSMUSG00000030208	Emp1	nonsense_mediated_decay	683	3utr	NA	NA	477	352	chr6	135381024	135381026	+	28550	30.8686	23.5399	26.3973	26.8431	15.7334	27.3505	69.927	80.8059	3	3	FALSE	0	TRUE	TRUE
ENSMUST00000124436	ENSMUSG00000053768	Chchd3	nonsense_mediated_decay	783	3utr	NA	NA	626	372	chr6	32792908	32792906	-	27141	17.2923	19.8243	23.6562	29.1374	28.2164	32	89.3539	60.7727	3	3	FALSE	0	TRUE	TRUE
ENSMUST00000124436	ENSMUSG00000053768	Chchd3	nonsense_mediated_decay	784	3utr	NA	NA	627	373	chr6	32792907	32792905	-	27140	32.1994	18.3137	49.3366	40.4443	17.6798	56.6945	114.819	99.8496	3	3	FALSE	0	TRUE	TRUE
ENSMUST00000145942	ENSMUSG00000032643	Fhl3	nonsense_mediated_decay	849	3utr	NA	NA	694	332	chr4	124707965	124707967	+	23736	18.8028	30.5234	12.666	38.4853	11.3137	18.9744	68.7734	61.9922	3	3	FALSE	0	TRUE	TRUE
ENSMUST00000189529	ENSMUSG00000026245	Farsb	nonsense_mediated_decay	340	3utr	NA	NA	319	128	chr1	78476227	78476225	-	1090	16.9117	15.862	38.5045	30.9307	10.6193	36.4235	77.9735	71.2782	3	3	FALSE	0	TRUE	TRUE
ENSMUST00000130606	ENSMUSG00000015733	Capza2	nonsense_mediated_decay	888	3utr	NA	NA	875	351	chr6	17665430	17665432	+	26942	21.1689	14.115	28.3611	22.2151	19.2006	34.5561	75.9718	63.6449	3	3	FALSE	0	TRUE	TRUE
ENSMUST00000110469	ENSMUSG00000069307	Hist1h2bq	nonsense_mediated_decay	26	cds	ATG	CCT	0	-126	chr13	21810172	21810170	-	9005	40.2094	40.9323	34.0089	79.645	73.1329	79.97	232.748	115.151	3	3	TRUE	0	TRUE	TRUE
ENSMUST00000110469	ENSMUSG00000069307	Hist1h2bq	nonsense_mediated_decay	29	cds	CCT	GAG	1	-125	chr13	21810169	21810167	-	9003	17.9119	14.7933	13.7706	24.6018	11.5899	21.0254	57.2172	46.4758	3	3	TRUE	0	TRUE	TRUE
ENSMUST00000110469	ENSMUSG00000069307	Hist1h2bq	nonsense_mediated_decay	383	cds	ACC	AAG	119	-7	chr13	21809815	21809813	-	8997	35.5015	19.3939	38.5013	30.8627	11.5686	32.2378	74.6691	93.3967	3	3	FALSE	0	TRUE	TRUE
ENSMUST00000153648	ENSMUSG00000029247	Paics	nonsense_mediated_decay	516	3utr	NA	NA	472	161	chr5	76959470	76959472	+	25320	24.9164	26.0928	38.1608	45.6117	26.541	64.8936	137.046	89.17	3	3	FALSE	0	TRUE	TRUE
ENSMUST00000153640	ENSMUSG00000030870	Ubfd1	nonsense_mediated_decay	543	3utr	NA	NA	542	236	chr7	122078555	122078557	+	30569	24.0866	44.1251	22.172	50.7751	12.2325	22.6947	85.7022	90.3837	3	3	FALSE	0	TRUE	TRUE
ENSMUST00000153640	ENSMUSG00000030870	Ubfd1	nonsense_mediated_decay	544	3utr	NA	NA	543	237	chr7	122078556	122078558	+	30570	18.3625	18.2777	18.9365	28.4387	10.0416	24.8736	63.3539	55.5767	3	3	FALSE	0	TRUE	TRUE
ENSMUST00000142736	ENSMUSG00000011114	Tbrg1	nonsense_mediated_decay	153	cds	ATG	AAA	20	-181	chr9	37657061	37657059	-	33492	22.2273	23.1539	32.2664	30.0167	14.3696	27.143	71.5293	77.6475	3	3	FALSE	0	TRUE	TRUE
ENSMUST00000090749	ENSMUSG00000071866	Ppia	nonsense_mediated_decay	131	cds	TTC	CAA	30	-10	chr11	6418116	6418118	+	4437	30.07	19.5079	32.3571	32.6808	13.9347	30.8262	77.4416	81.9349	3	3	FALSE	0	TRUE	TRUE
ENSMUST00000090749	ENSMUSG00000071866	Ppia	nonsense_mediated_decay	134	cds	CAA	AGA	31	-9	chr11	6418119	6418121	+	4439	38.8974	24.7599	40.2466	49.822	15.0278	43.5988	108.449	103.904	3	3	FALSE	0	TRUE	TRUE
ENSMUST00000090749	ENSMUSG00000071866	Ppia	nonsense_mediated_decay	146	cds	AAA	ACT	35	-5	chr11	6418131	6418227	+	4443	12.2873	10.1899	16.2743	11.2747	11.3137	18.1502	40.7386	38.7514	3	3	FALSE	0	TRUE	TRUE
ENSMUST00000090749	ENSMUSG00000071866	Ppia	nonsense_mediated_decay	200	3utr	NA	NA	158	36	chr11	6418279	6418281	+	4449	23.47	21.5409	22.8047	22.2808	15.0278	21.6577	58.9663	67.8156	3	3	FALSE	0	TRUE	TRUE
ENSMUST00000090749	ENSMUSG00000071866	Ppia	nonsense_mediated_decay	239	3utr	NA	NA	197	75	chr11	6419116	6419118	+	4454	18.1705	12.7312	36.1748	11.5864	22.7798	31.4148	65.781	67.0764	3	3	FALSE	0	TRUE	TRUE
ENSMUST00000090749	ENSMUSG00000071866	Ppia	nonsense_mediated_decay	332	3utr	NA	NA	290	168	chr11	6419209	6419211	+	4462	32.7146	31.3672	42.8598	34.1827	60.0682	55.6013	149.852	106.942	3	3	FALSE	0	TRUE	TRUE
ENSMUST00000133568	ENSMUSG00000004455	Ppp1cc	nonsense_mediated_decay	84	cds	GGC	AAG	28	-58	chr5	32478178	32478180	+	24808	23.4889	32.2304	38.3576	40.3007	20.6057	27.1847	88.0911	94.0769	3	3	FALSE	0	TRUE	TRUE
ENSMUST00000192639	ENSMUSG00000026701	Prdx6	nonsense_mediated_decay	181	cds	ATG	GTG	37	-39	chr1	161244327	161244325	-	1885	12.6839	25.8341	23.5381	21.8615	24.8645	18.1537	64.8797	62.0561	3	3	FALSE	0	TRUE	TRUE
ENSMUST00000192639	ENSMUSG00000026701	Prdx6	nonsense_mediated_decay	583	3utr	NA	NA	512	282	chr1	161241726	161241724	-	1872	61.8454	64.2313	106.274	53.2423	19.8998	82.2328	155.375	232.351	3	3	FALSE	0	TRUE	TRUE
ENSMUST00000173482	ENSMUSG00000006050	Sra1	nonsense_mediated_decay	658	3utr	NA	NA	657	542	chr18	36667459	36667457	-	16114	25.1313	23.6833	51.5421	33.9001	18.2383	27.2126	79.3511	100.357	3	3	FALSE	0	TRUE	TRUE
ENSMUST00000163246	ENSMUSG00000061904	Slc25a3	nonsense_mediated_decay	554	3utr	NA	NA	507	202	chr10	91119568	91119566	-	3609	34.2153	41.7428	38.8751	43.683	25.7016	54.4603	123.845	114.833	3	3	FALSE	0	TRUE	TRUE
ENSMUST00000163246	ENSMUSG00000061904	Slc25a3	nonsense_mediated_decay	647	3utr	NA	NA	600	295	chr10	91118829	91118827	-	3600	16.3663	15.0468	16.8454	11.6351	13.7584	22.1867	47.5802	48.2585	3	3	FALSE	0	TRUE	TRUE
ENSMUST00000163246	ENSMUSG00000061904	Slc25a3	nonsense_mediated_decay	716	3utr	NA	NA	669	364	chr10	91118760	91118758	-	3593	22.5604	26.6568	29.3884	25.8715	18.3712	18.697	62.9396	78.6056	3	3	FALSE	0	TRUE	TRUE
ENSMUST00000163246	ENSMUSG00000061904	Slc25a3	nonsense_mediated_decay	1217	3utr	NA	NA	1170	865	chr10	91116969	91116967	-	3563	37.4438	54.3585	22.0385	69.0775	23.0526	27.0711	119.201	113.841	3	3	FALSE	0	TRUE	TRUE
ENSMUST00000021084	ENSMUSG00000020738	Sumo2	nonsense_mediated_decay	309	3utr	NA	NA	197	36	chr11	115530369	115530367	-	7169	49.5189	42.6356	63.8919	50.1965	25.8264	41.1856	117.208	156.046	3	3	FALSE	0	TRUE	TRUE
ENSMUST00000102589	ENSMUSG00000059796	Eif4a1	nonsense_mediated_decay	121	cds	CAT	GTC	25	-25	chr11	69672303	69672301	-	5566	25.7123	53.3108	32.7739	50.848	13.634	24.8228	89.3048	111.797	3	3	FALSE	0	TRUE	TRUE
ENSMUST00000102589	ENSMUSG00000059796	Eif4a1	nonsense_mediated_decay	124	cds	GTC	TGC	26	-24	chr11	69672300	69672298	-	5564	58.2658	53.9446	60.0631	57.1472	28.9192	56.9106	142.977	172.273	3	3	FALSE	0	TRUE	TRUE
ENSMUST00000102589	ENSMUSG00000059796	Eif4a1	nonsense_mediated_decay	381	3utr	NA	NA	334	182	chr11	69670219	69670217	-	5547	44.8585	39.1022	58.0573	28.3384	25.4888	44.9889	98.8161	142.018	3	3	FALSE	0	TRUE	TRUE
ENSMUST00000102589	ENSMUSG00000059796	Eif4a1	nonsense_mediated_decay	711	3utr	NA	NA	664	512	chr11	69668679	69668677	-	5530	14.9165	14.5781	17.0427	19.9213	10.2132	20.8615	50.996	46.5373	3	3	FALSE	0	TRUE	TRUE
ENSMUST00000155452	ENSMUSG00000022956	Atp5o	nonsense_mediated_decay	498	3utr	NA	NA	497	282	chr16	91925283	91925281	-	14156	39.4068	51.4774	44.3771	44.4631	23.0924	66.2437	133.799	135.261	3	3	FALSE	0	TRUE	TRUE
ENSMUST00000155452	ENSMUSG00000022956	Atp5o	nonsense_mediated_decay	499	3utr	NA	NA	498	283	chr16	91925282	91925280	-	14155	19.4947	28.1726	27.584	22.4652	23.6238	35.584	81.673	75.2513	3	3	FALSE	0	TRUE	TRUE
ENSMUST00000177376	ENSMUSG00000025613	Cct8	nonsense_mediated_decay	210	cds	TGG	NA	70	-1	chr16	87491393	87491391	-	14100	31.5619	21.5938	24.3624	38.0837	40.5298	28.5441	107.158	77.5181	3	3	TRUE	0	TRUE	TRUE
ENSMUST00000190155	ENSMUSG00000025917	Cops5	nonsense_mediated_decay	736	3utr	NA	NA	735	293	chr1	10024984	10024982	-	29	17.648	20.8787	26.6949	24.9489	22.9551	15.7574	63.6613	65.2215	3	3	FALSE	0	TRUE	TRUE
ENSMUST00000025746	ENSMUSG00000024826	Dpf2	nonsense_mediated_decay	902	3utr	NA	NA	901	259	chr19	5901223	5901221	-	16909	27.1667	39.6437	15.7532	37.4388	11.9585	35.0648	84.4621	82.5636	3	3	FALSE	0	TRUE	TRUE
ENSMUST00000025746	ENSMUSG00000024826	Dpf2	nonsense_mediated_decay	903	3utr	NA	NA	902	260	chr19	5901222	5901220	-	16908	17	16.1548	31.533	23.9504	13.3661	16.5287	53.8452	64.6877	3	3	FALSE	0	TRUE	TRUE
ENSMUST00000037776	ENSMUSG00000071172	Srsf3	nonsense_mediated_decay	460	cds	GAT	GAT	101	-23	chr17	29039456	29039458	+	14765	18.6011	15.722	11.5683	19.4781	15.5733	24.3021	59.3535	45.8914	3	3	FALSE	0	TRUE	TRUE
ENSMUST00000037776	ENSMUSG00000071172	Srsf3	nonsense_mediated_decay	1058	3utr	NA	NA	900	526	chr17	29041402	29041404	+	14770	22.5929	17.1438	25.5541	29.1507	16.8268	32.8647	78.8422	65.2908	3	3	FALSE	0	TRUE	TRUE
ENSMUST00000144574	ENSMUSG00000029176	Anapc4	nonsense_mediated_decay	2126	3utr	NA	NA	1987	1739	chr5	52864492	52864494	+	25081	29.7257	36.6134	56.7963	33.879	14.3078	43.0348	91.2215	123.135	3	3	FALSE	0	TRUE	TRUE
ENSMUST00000138101	ENSMUSG00000019179	Mdh2	nonsense_mediated_decay	836	3utr	NA	NA	761	606	chr5	135790122	135790124	+	26122	24.3324	15.3103	15.9629	22.5935	18.5718	36.7612	77.9264	55.6057	3	3	FALSE	0	TRUE	TRUE
ENSMUST00000135079	ENSMUSG00000027248	Pdia3	nonsense_mediated_decay	360	cds	CTG	AAA	120	-4	chr2	121431716	121431718	+	19799	63.6949	53.4286	70.974	65.274	39.802	101.118	206.194	188.097	3	3	FALSE	0	TRUE	TRUE
ENSMUST00000135079	ENSMUSG00000027248	Pdia3	nonsense_mediated_decay	426	3utr	NA	NA	425	51	chr2	121432287	121432289	+	19804	19.7547	12.4671	36.7697	12.274	10.5529	21.3898	44.2167	68.9915	3	3	FALSE	0	TRUE	TRUE
ENSMUST00000135079	ENSMUSG00000027248	Pdia3	nonsense_mediated_decay	597	3utr	NA	NA	596	222	chr2	121433575	121433577	+	19810	18.6937	17.5562	25.0972	15.0555	15.382	18.1553	48.5927	61.347	3	3	FALSE	0	TRUE	TRUE
ENSMUST00000135079	ENSMUSG00000027248	Pdia3	nonsense_mediated_decay	636	3utr	NA	NA	635	261	chr2	121433614	121433616	+	19815	16.1714	25.2584	18.2709	24.656	11.5696	18.1553	54.3808	59.7008	3	3	FALSE	0	TRUE	TRUE
ENSMUST00000134815	ENSMUSG00000001555	Fkbp10	nonsense_mediated_decay	93	cds	GGG	CCT	31	-35	chr11	100415937	100415939	+	6737	12.5814	14.081	13.1405	15.2479	10.6241	13.1035	38.9755	39.8029	3	3	FALSE	0	TRUE	TRUE
ENSMUST00000134815	ENSMUSG00000001555	Fkbp10	nonsense_mediated_decay	574	3utr	NA	NA	573	374	chr11	100421700	100421702	+	6752	24.5667	15.7282	20.5605	22.8173	14.5325	24.6418	61.9917	60.8555	3	3	FALSE	0	TRUE	TRUE
ENSMUST00000107330	ENSMUSG00000105518	Gm42674	nonsense_mediated_decay	159	cds	ATG	GCA	53	-10	chr3	90605119	90605121	+	21614	199.524	214.395	272.626	308.887	168.133	198.936	675.956	686.545	3	3	FALSE	0	TRUE	TRUE
ENSMUST00000132543	ENSMUSG00000020929	Eftud2	nonsense_mediated_decay	410	3utr	NA	NA	409	153	chr11	102839248	102839246	-	6937	30.1667	48.5816	33.7803	60.9707	24.0348	49.4762	134.482	112.529	3	3	FALSE	0	TRUE	TRUE
ENSMUST00000082421	ENSMUSG00000064370	mt-Cytb	protein_coding	126	cds	GTC	CAA	42	-338	chrMT	14270	14272	+	35669	16.1456	30.3539	23.5399	20.6364	11.2996	12.5095	44.4455	70.0393	3	3	FALSE	0	FALSE	TRUE
ENSMUST00000082421	ENSMUSG00000064370	mt-Cytb	protein_coding	156	cds	ATA	CAC	52	-328	chrMT	14300	14302	+	35671	27.5995	29.1899	35.4918	10.6397	19.7513	18.6418	49.0327	92.2812	3	3	FALSE	0	FALSE	TRUE
ENSMUST00000082421	ENSMUSG00000064370	mt-Cytb	protein_coding	462	cds	TAT	ATT	154	-226	chrMT	14606	14608	+	35679	14.1472	29.7046	20.01	20.9177	11.9882	16.1698	49.0756	63.8617	3	3	FALSE	0	FALSE	TRUE
ENSMUST00000082419	ENSMUSG00000064368	mt-Nd6	protein_coding	450	cds	ATG	ATG	150	-22	chrMT	13621	13619	-	35658	12.0275	14.7514	38.9566	16.6086	18.6013	17.15	52.3599	65.7354	3	3	FALSE	0	FALSE	TRUE
ENSMUST00000082418	ENSMUSG00000064367	mt-Nd5	protein_coding	1473	cds	ATT	ATT	491	-116	chrMT	13214	13216	+	35654	13.4714	13.5477	20.9246	15.0652	13	12.9726	41.0377	47.9438	3	3	FALSE	0	FALSE	TRUE
ENSMUST00000082414	ENSMUSG00000064363	mt-Nd4	protein_coding	699	cds	ATT	CTT	233	-225	chrMT	10865	10867	+	35631	38.3261	34.9158	68.3561	41.126	23.2738	26.0627	90.4625	141.598	3	3	FALSE	0	FALSE	TRUE
ENSMUST00000082411	ENSMUSG00000064360	mt-Nd3	protein_coding	108	cds	TAT	GAA	36	-79	chrMT	9566	9568	+	35614	39.6568	43.9038	60.6442	31.5573	24.6933	54.652	110.903	144.205	3	3	FALSE	0	FALSE	TRUE
ENSMUST00000082411	ENSMUSG00000064360	mt-Nd3	protein_coding	111	cds	GAA	TGC	37	-78	chrMT	9569	9571	+	35615	22.3977	19.7021	14.788	24.1653	19.2973	17.4745	60.9372	56.8878	3	3	FALSE	0	FALSE	TRUE
ENSMUST00000082409	ENSMUSG00000064358	mt-Co3	protein_coding	606	cds	TTC	CAT	202	-58	chrMT	9212	9214	+	35610	54.9641	46.2663	80.8706	35.3212	38.3847	51.2519	124.958	182.101	3	3	FALSE	0	FALSE	TRUE
ENSMUST00000082408	ENSMUSG00000064357	mt-Atp6	protein_coding	15	cds	TTT	GCC	5	-221	chrMT	7941	7943	+	35572	19.0055	43.782	22.1866	55.871	11.4264	22.5278	89.8251	84.9742	3	3	FALSE	0	FALSE	TRUE
ENSMUST00000082408	ENSMUSG00000064357	mt-Atp6	protein_coding	144	cds	CTA	GTT	48	-178	chrMT	8070	8072	+	35577	64.5406	60.6395	77.0971	38.869	19.2173	58.9293	117.016	202.277	3	3	FALSE	0	FALSE	TRUE
ENSMUST00000082408	ENSMUSG00000064357	mt-Atp6	protein_coding	336	cds	GTA	ATT	112	-114	chrMT	8262	8264	+	35581	32.2079	38.2767	49.2529	36.4718	23.1081	56.8682	116.448	119.738	3	3	FALSE	0	FALSE	TRUE
ENSMUST00000082408	ENSMUSG00000064357	mt-Atp6	protein_coding	591	cds	CTA	CTC	197	-29	chrMT	8517	8519	+	35589	13.6017	17.5005	29.1762	18.9259	11.9897	16.036	46.9516	60.2783	3	3	FALSE	0	FALSE	TRUE
ENSMUST00000082408	ENSMUSG00000064357	mt-Atp6	protein_coding	594	cds	CTC	ACA	198	-28	chrMT	8520	8522	+	35590	38.3727	42.1913	75.3618	38.354	22	37.0108	97.3649	155.926	3	3	FALSE	0	FALSE	TRUE
ENSMUST00000082407	ENSMUSG00000064356	mt-Atp8	protein_coding	12	cds	GAT	ACA	4	-63	chrMT	7777	7779	+	35564	49.0568	38.5678	56.209	12.9292	43.3828	33.243	89.555	143.834	3	3	TRUE	0	FALSE	TRUE
ENSMUST00000082407	ENSMUSG00000064356	mt-Atp8	protein_coding	72	cds	CAA	CTA	24	-43	chrMT	7837	7839	+	35565	27.4659	30.4922	38.561	26.2502	17.2691	30.6934	74.2127	96.5192	3	3	FALSE	0	FALSE	TRUE
ENSMUST00000082407	ENSMUSG00000064356	mt-Atp8	protein_coding	174	cds	TAT	TTG	58	-9	chrMT	7939	7941	+	35571	30.4621	71.6019	28.3505	64.6496	14.7729	22.8005	102.223	130.415	3	3	FALSE	0	FALSE	TRUE
ENSMUST00000082402	ENSMUSG00000064351	mt-Co1	protein_coding	108	cds	ATT	CGA	36	-478	chrMT	5435	5437	+	35493	19.4683	13.3919	26.3181	19.2471	14.888	26.0576	60.1926	59.1782	3	3	FALSE	0	FALSE	TRUE
ENSMUST00000082402	ENSMUSG00000064351	mt-Co1	protein_coding	153	cds	CAA	ATT	51	-463	chrMT	5480	5482	+	35495	33.9553	28.7054	36.1647	25.6338	14.888	30.9541	71.4759	98.8254	3	3	FALSE	0	FALSE	TRUE
ENSMUST00000082402	ENSMUSG00000064351	mt-Co1	protein_coding	588	cds	TTA	TCA	196	-318	chrMT	5915	5917	+	35509	19.8977	31.5901	11.0607	14.793	13.8066	16.7621	45.3618	62.5484	3	3	FALSE	0	FALSE	TRUE
ENSMUST00000082402	ENSMUSG00000064351	mt-Co1	protein_coding	657	cds	TTT	GAT	219	-295	chrMT	5984	5986	+	35512	39.9904	55.6282	49.7552	57.2106	34.0852	55.437	146.733	145.374	3	3	FALSE	0	FALSE	TRUE
ENSMUST00000082402	ENSMUSG00000064351	mt-Co1	protein_coding	699	cds	CTG	TTC	233	-281	chrMT	6026	6028	+	35516	45.9502	61.8376	62.4037	36.7157	20.7582	31.9626	89.4365	170.192	3	3	FALSE	0	FALSE	TRUE
ENSMUST00000082402	ENSMUSG00000064351	mt-Co1	protein_coding	762	cds	TCA	CAT	254	-260	chrMT	6089	6091	+	35519	24.4481	41.9441	32.2833	33.5556	18.3402	32.1401	84.0358	98.6755	3	3	FALSE	0	FALSE	TRUE
ENSMUST00000082402	ENSMUSG00000064351	mt-Co1	protein_coding	765	cds	CAT	GTA	255	-259	chrMT	6092	6094	+	35520	22.001	27.3153	16.0549	17.088	16.5849	15.0841	48.7571	65.3712	3	3	FALSE	0	FALSE	TRUE
ENSMUST00000082402	ENSMUSG00000064351	mt-Co1	protein_coding	954	cds	AAA	GTA	318	-196	chrMT	6281	6283	+	35527	20.5923	28.3102	15.2703	22.072	12.1807	19.4778	53.7305	64.1727	3	3	FALSE	0	FALSE	TRUE
ENSMUST00000082402	ENSMUSG00000064351	mt-Co1	protein_coding	1134	cds	TAT	GTT	378	-136	chrMT	6461	6463	+	35533	29.943	75.2241	11.9172	36.5619	28.346	28.149	93.057	117.084	3	3	FALSE	0	FALSE	TRUE
ENSMUST00000082402	ENSMUSG00000064351	mt-Co1	protein_coding	1287	cds	TTC	CTG	429	-85	chrMT	6614	6616	+	35537	21.966	39.8694	27.0436	28.3358	32.3623	39.0641	99.7622	88.8791	3	3	FALSE	0	FALSE	TRUE
ENSMUST00000082402	ENSMUSG00000064351	mt-Co1	protein_coding	1290	cds	CTG	GGC	430	-84	chrMT	6617	6619	+	35538	22.3407	25.5439	19.6846	28.5815	21.5333	24.2829	74.3976	67.5691	3	3	FALSE	0	FALSE	TRUE
ENSMUST00000082402	ENSMUSG00000064351	mt-Co1	protein_coding	1329	cds	CCA	GAT	443	-71	chrMT	6656	6658	+	35539	30.9625	39.8694	44.9523	27.9674	13.1687	31.3488	72.4849	115.784	3	3	FALSE	0	FALSE	TRUE
ENSMUST00000082402	ENSMUSG00000064351	mt-Co1	protein_coding	1332	cds	GAT	GCT	444	-70	chrMT	6659	6661	+	35540	54.9472	53.3569	56.1106	62.1115	23.9943	55.7204	141.826	164.415	3	3	FALSE	0	FALSE	TRUE
ENSMUST00000082402	ENSMUSG00000064351	mt-Co1	protein_coding	1500	cds	CCA	TAT	500	-14	chrMT	6827	6829	+	35545	49.8161	75.4363	64.6412	52.5315	24.4866	14.8677	91.8858	189.894	3	3	FALSE	0	FALSE	TRUE
ENSMUST00000082392	ENSMUSG00000064341	mt-Nd1	protein_coding	48	cds	ATA	GCC	16	-302	chrMT	2798	2800	+	35473	53.8317	62.4263	52.0318	32.4611	19.9743	29.9694	82.4047	168.29	3	3	FALSE	0	FALSE	TRUE
ENSMUST00000082392	ENSMUSG00000064341	mt-Nd1	protein_coding	813	cds	TGG	ATC	271	-47	chrMT	3563	3565	+	35480	48	62.6232	48.6697	36.9222	15.5885	36.9505	89.4612	159.293	3	3	FALSE	0	FALSE	TRUE
ENSMUST00000105038	ENSMUSG00000078240	Gm3550	protein_coding	1056	cds	ATG	GCC	0	-160	chr18	34737414	34737416	+	15998	211.436	236.209	204.015	179.167	73.1106	120.281	372.559	651.661	3	3	TRUE	0	FALSE	TRUE
ENSMUST00000105038	ENSMUSG00000078240	Gm3550	protein_coding	1377	cds	AGC	TAC	107	-53	chr18	34737735	34737737	+	16003	19.9815	17.9987	16.8971	19.8157	16.9651	15.0886	51.8694	54.8774	3	3	FALSE	0	FALSE	TRUE
ENSMUST00000105038	ENSMUSG00000078240	Gm3550	protein_coding	1437	cds	GGG	GCC	127	-33	chr18	34737795	34737797	+	16005	10.574	17.3049	13.1475	21.6105	31.0148	36.2241	88.8495	41.0264	3	3	FALSE	0	FALSE	TRUE
ENSMUST00000105038	ENSMUSG00000078240	Gm3550	protein_coding	1533	cds	CCA	NA	159	-1	chr18	34737891	34737893	+	16006	84.93	89.4636	104.21	116.25	35.1651	59.3387	210.753	278.603	3	3	TRUE	0	FALSE	TRUE
ENSMUST00000096350	ENSMUSG00000042622	Maff	protein_coding	266	cds	ATG	GCT	0	-156	chr15	79357018	79357020	+	12206	28.9524	22.3109	22.3187	28.1826	10.1036	10.9551	49.2413	73.582	3	3	TRUE	0	FALSE	TRUE
ENSMUST00000163691	ENSMUSG00000042622	Maff	protein_coding	214	cds	ATG	GCT	0	-156	chr15	79356994	79356996	+	12204	28.9524	22.3109	22.3187	28.1826	10.1036	10.9551	49.2413	73.582	3	3	TRUE	0	FALSE	TRUE
ENSMUST00000074615	ENSMUSG00000096486	Gm5426	protein_coding	183	cds	ACT	GGT	61	-42	chr10	96136785	96136787	+	3685	23.5613	17.3682	25.3842	30.3408	22.7976	20.759	73.8973	66.3137	3	3	FALSE	0	FALSE	TRUE
ENSMUST00000195717	ENSMUSG00000057335	Cep170	protein_coding	212	cds	ATG	AGC	0	-1578	chr1	176793610	176793608	-	2174	12.0962	13.5879	25.5294	12.1007	15.532	24.925	52.5577	51.2135	3	3	TRUE	0	FALSE	FALSE
ENSMUST00000195717	ENSMUSG00000057335	Cep170	protein_coding	3221	cds	ATC	CGG	1003	-575	chr1	176755803	176755801	-	2167	12.7279	21.2592	28.8944	21.4622	17.0884	21.2132	59.7638	62.8815	3	3	FALSE	0	FALSE	FALSE
ENSMUST00000195717	ENSMUSG00000057335	Cep170	protein_coding	4943	cds	GAA	NA	1577	-1	chr1	176735686	176735684	-	2158	21.4962	37.8674	39.3054	24.5727	22.311	23.9964	70.88	98.669	3	3	TRUE	0	FALSE	FALSE
ENSMUST00000194727	ENSMUSG00000057335	Cep170	protein_coding	3009	cds	ATC	CGG	1003	-585	chr1	176755803	176755801	-	2167	12.7279	21.2592	28.8944	21.4622	17.0884	21.2132	59.7638	62.8815	3	3	FALSE	0	FALSE	FALSE
ENSMUST00000194727	ENSMUSG00000057335	Cep170	protein_coding	3822	cds	ATT	AAA	1274	-314	chr1	176749985	176749983	-	2162	12.5078	11.5655	22.6149	20	14.9926	32.5858	67.5784	46.6882	3	3	FALSE	0	FALSE	FALSE
ENSMUST00000194727	ENSMUSG00000057335	Cep170	protein_coding	4761	cds	GAA	NA	1587	-1	chr1	176735686	176735684	-	2158	25.4743	42.7204	44.1609	22.9953	17.3212	24.2526	64.5691	112.356	3	3	TRUE	0	FALSE	FALSE
ENSMUST00000192927	ENSMUSG00000057335	Cep170	protein_coding	714	cds	ATC	CGG	238	-549	chr1	176755803	176755801	-	2167	12.7279	21.2592	28.8944	21.4622	17.0884	21.2132	59.7638	62.8815	3	3	FALSE	0	FALSE	FALSE
ENSMUST00000192927	ENSMUSG00000057335	Cep170	protein_coding	1419	cds	ATT	AAA	473	-314	chr1	176749985	176749983	-	2162	12.1244	11.6237	16.2491	20.0594	20	30.4819	70.5413	39.9972	3	3	FALSE	0	FALSE	FALSE
ENSMUST00000192927	ENSMUSG00000057335	Cep170	protein_coding	2358	cds	GAA	NA	786	-1	chr1	176735686	176735684	-	2158	20.8941	30.8732	38.9591	32.7828	17.6431	20.0779	70.5038	90.7265	3	3	TRUE	0	FALSE	FALSE
ENSMUST00000057037	ENSMUSG00000057335	Cep170	protein_coding	166	cds	ATG	AGC	0	-1578	chr1	176793610	176793608	-	2174	12.1042	13.5841	25.6611	11.8953	15.6117	24.925	52.4321	51.3494	3	3	TRUE	0	FALSE	FALSE
ENSMUST00000057037	ENSMUSG00000057335	Cep170	protein_coding	3175	cds	ATC	CGG	1003	-575	chr1	176755803	176755801	-	2167	12.7279	21.2592	28.8944	21.4622	17.0884	21.2132	59.7638	62.8815	3	3	FALSE	0	FALSE	FALSE
ENSMUST00000057037	ENSMUSG00000057335	Cep170	protein_coding	4897	cds	GAA	NA	1577	-1	chr1	176735686	176735684	-	2158	23.3905	36.124	36.0419	27.4697	21.0603	23.9964	72.5264	95.5564	3	3	TRUE	0	FALSE	FALSE
ENSMUST00000065629	ENSMUSG00000021585	Cast	protein_coding	1657	cds	CCT	GAT	522	-232	chr13	74724787	74724785	-	9843	22.0056	27.0682	38.254	27.2114	15.1341	36.825	79.1705	87.3278	3	3	FALSE	0	FALSE	TRUE
ENSMUST00000017975	ENSMUSG00000017831	Rab5a	protein_coding	1109	cds	AAC	NA	214	-1	chr17	53506423	53506425	+	15432	14.4957	22.6746	24.7959	14.5045	10.328	15.8693	40.7018	61.9661	3	3	TRUE	0	FALSE	TRUE
ENSMUST00000001547	ENSMUSG00000001506	Col1a1	protein_coding	86	5utr	NA	NA	-60	-4421	chr11	94936309	94936311	+	6306	143.516	159.952	111.595	127.073	36.9778	62.7999	226.85	415.063	3	3	FALSE	0	FALSE	TRUE
ENSMUST00000001547	ENSMUSG00000001506	Col1a1	protein_coding	129	5utr	NA	NA	-17	-4378	chr11	94936352	94936354	+	6307	358.16	335.994	414.81	342.007	280.316	471.637	1093.96	1108.96	3	3	FALSE	0	FALSE	TRUE
ENSMUST00000001547	ENSMUSG00000001506	Col1a1	protein_coding	130	5utr	NA	NA	-16	-4377	chr11	94936353	94936355	+	6308	42.7585	34.7848	62.7435	51.9119	142.169	91.6937	285.774	140.287	3	3	FALSE	0	FALSE	TRUE
ENSMUST00000001547	ENSMUSG00000001506	Col1a1	protein_coding	145	cds	ATG	TTC	0	-1453	chr11	94936368	94936370	+	6310	143.505	178.153	129.762	135.908	26.9688	73.6027	236.48	451.42	3	3	TRUE	0	FALSE	TRUE
ENSMUST00000001547	ENSMUSG00000001506	Col1a1	protein_coding	202	cds	ACG	CAT	19	-1434	chr11	94936425	94936427	+	6312	27.4987	31.2601	31.8172	38.1291	12.0621	18.3288	68.52	90.576	3	3	FALSE	0	FALSE	TRUE
ENSMUST00000001547	ENSMUSG00000001506	Col1a1	protein_coding	241	cds	CAC	AAT	32	-1421	chr11	94937929	94937931	+	6315	19.6419	25.0072	16.0809	24.0001	24.9794	22.832	71.8115	60.73	3	3	FALSE	0	FALSE	TRUE
ENSMUST00000001547	ENSMUSG00000001506	Col1a1	protein_coding	313	cds	GGC	ACG	56	-1397	chr11	94938001	94938003	+	6319	22.9792	23.3034	19.7893	18.5044	12.6713	22.4791	53.6547	66.0719	3	3	FALSE	0	FALSE	TRUE
ENSMUST00000001547	ENSMUSG00000001506	Col1a1	protein_coding	466	cds	GGC	CCC	107	-1346	chr11	94938395	94938397	+	6326	96.6929	176.881	81.0318	169.331	105.832	129.007	404.171	354.606	3	3	FALSE	0	FALSE	TRUE
ENSMUST00000001547	ENSMUSG00000001506	Col1a1	protein_coding	529	cds	GGA	CTT	128	-1325	chr11	94938548	94938550	+	6327	33.4365	32.1768	32.8896	41.2138	33.7619	38.1126	113.088	98.503	3	3	FALSE	0	FALSE	TRUE
ENSMUST00000001547	ENSMUSG00000001506	Col1a1	protein_coding	532	cds	CTT	CCT	129	-1324	chr11	94938551	94938553	+	6328	12.4032	16.3817	12.6407	31.1062	23.8312	20.4876	75.425	41.4256	3	3	FALSE	0	FALSE	TRUE
ENSMUST00000001547	ENSMUSG00000001506	Col1a1	protein_coding	616	cds	GAT	GAA	157	-1296	chr11	94939420	94939422	+	6332	79.3593	70.8054	74.9422	118.544	60.0864	175.14	353.77	225.107	3	3	FALSE	0	FALSE	TRUE
ENSMUST00000001547	ENSMUSG00000001506	Col1a1	protein_coding	649	cds	CCC	ATG	168	-1285	chr11	94939453	94939455	+	6333	48.1813	49.9622	40.1282	43.2261	30.1537	39.9828	113.363	138.272	3	3	FALSE	0	FALSE	TRUE
ENSMUST00000001547	ENSMUSG00000001506	Col1a1	protein_coding	703	cds	CCA	CAA	186	-1267	chr11	94939906	94939908	+	6335	20.38	13.7555	24.5021	21.1864	15.1099	20.9063	57.2026	58.6376	3	3	FALSE	0	FALSE	TRUE
ENSMUST00000001547	ENSMUSG00000001506	Col1a1	protein_coding	706	cds	CAA	GGT	187	-1266	chr11	94939909	94939911	+	6336	36.8132	30.3025	26.8	31.8229	16.8465	23.3396	72.0091	93.9157	3	3	FALSE	0	FALSE	TRUE
ENSMUST00000001547	ENSMUSG00000001506	Col1a1	protein_coding	736	cds	GGC	GAG	197	-1256	chr11	94939939	94939941	+	6337	31.1324	26.8552	17.764	29.2789	40.3493	53.2564	122.885	75.7516	3	3	FALSE	0	FALSE	TRUE
ENSMUST00000001547	ENSMUSG00000001506	Col1a1	protein_coding	1033	cds	GGT	GAG	296	-1157	chr11	94941397	94941399	+	6350	128.771	206.336	81.6063	179.393	86.607	66.2911	332.291	416.713	3	3	FALSE	0	FALSE	TRUE
ENSMUST00000001547	ENSMUSG00000001506	Col1a1	protein_coding	1429	cds	GGC	AAC	428	-1025	chr11	94942577	94942579	+	6355	65.407	42.7208	68.5874	67.3739	74.8993	117.039	259.312	176.715	3	3	FALSE	0	FALSE	TRUE
ENSMUST00000001547	ENSMUSG00000001506	Col1a1	protein_coding	1465	cds	GGT	GCT	440	-1013	chr11	94942613	94942796	+	6356	38.6962	35.3022	74.7999	69.103	39.5497	73.4678	182.121	148.798	3	3	FALSE	0	FALSE	TRUE
ENSMUST00000001547	ENSMUSG00000001506	Col1a1	protein_coding	1528	cds	GGT	GAG	461	-992	chr11	94942857	94942859	+	6360	12.3592	13.7355	15.6772	23.2368	15.4824	29.706	68.4252	41.7719	3	3	FALSE	0	FALSE	TRUE
ENSMUST00000001547	ENSMUSG00000001506	Col1a1	protein_coding	1681	cds	GGT	GAA	512	-941	chr11	94943396	94943398	+	6367	26.1204	41.7676	26.8	45.6262	18.8321	18.1632	82.6215	94.688	3	3	FALSE	0	FALSE	TRUE
ENSMUST00000001547	ENSMUSG00000001506	Col1a1	protein_coding	1735	cds	GGC	AGT	530	-923	chr11	94943598	94943600	+	6369	27.9213	24.6175	22.4339	19.1741	13.0937	25.6442	57.912	74.9727	3	3	FALSE	0	FALSE	TRUE
ENSMUST00000001547	ENSMUSG00000001506	Col1a1	protein_coding	1825	cds	GGA	GCC	560	-893	chr11	94943777	94943779	+	6374	21.7307	24.9697	14.506	23.3364	14.0264	14.6721	52.0349	61.2064	3	3	FALSE	0	FALSE	TRUE
ENSMUST00000001547	ENSMUSG00000001506	Col1a1	protein_coding	2068	cds	GGT	GAA	641	-812	chr11	94944940	94944942	+	6382	13.5623	20.7306	27.867	11.6088	41.6824	19.2861	72.5772	62.1599	3	3	FALSE	0	FALSE	TRUE
ENSMUST00000001547	ENSMUSG00000001506	Col1a1	protein_coding	2086	cds	GGT	GAA	647	-806	chr11	94944958	94944960	+	6383	135.743	143.873	88.1089	267.711	104.459	206.605	578.775	367.724	3	3	FALSE	0	FALSE	TRUE
ENSMUST00000001547	ENSMUSG00000001506	Col1a1	protein_coding	2518	cds	GGT	GAG	791	-662	chr11	94946784	94946786	+	6392	43.9042	38.9044	34.3833	77.9146	84.1256	73.7721	235.812	117.192	3	3	FALSE	0	FALSE	TRUE
ENSMUST00000001547	ENSMUSG00000001506	Col1a1	protein_coding	2599	cds	GGT	GAT	818	-635	chr11	94947109	94947111	+	6393	35.35	46.2436	67.9334	89.8927	18.0566	62.9246	170.874	149.527	3	3	FALSE	0	FALSE	TRUE
ENSMUST00000001547	ENSMUSG00000001506	Col1a1	protein_coding	2869	cds	GGT	GAA	908	-545	chr11	94947707	94947709	+	6398	26.6931	44.2894	32.5574	51.2711	47.524	19.2424	118.038	103.54	3	3	FALSE	0	FALSE	TRUE
ENSMUST00000001547	ENSMUSG00000001506	Col1a1	protein_coding	2872	cds	GAA	GTT	909	-544	chr11	94947710	94947712	+	6399	10.8326	19.3349	11.7138	26.2275	23.3812	20.6389	70.2476	41.8813	3	3	FALSE	0	FALSE	TRUE
ENSMUST00000001547	ENSMUSG00000001506	Col1a1	protein_coding	3058	cds	GGC	AAA	971	-482	chr11	94948340	94948342	+	6403	35.7721	20.1264	43.1186	27.5854	26.4014	43.3901	97.377	99.0171	3	3	FALSE	0	FALSE	TRUE
ENSMUST00000001547	ENSMUSG00000001506	Col1a1	protein_coding	3085	cds	GGT	GAA	980	-473	chr11	94948367	94948369	+	6404	21.288	20.2105	32.3818	14.3409	12.1778	17.3367	43.8554	73.8802	3	3	FALSE	0	FALSE	TRUE
ENSMUST00000001547	ENSMUSG00000001506	Col1a1	protein_coding	3427	cds	GGC	ATA	1094	-359	chr11	94949409	94949411	+	6411	27.8087	24.8132	16.9188	39.6806	19.1423	23.5246	82.3474	69.5408	3	3	FALSE	0	FALSE	TRUE
ENSMUST00000001547	ENSMUSG00000001506	Col1a1	protein_coding	3481	cds	GGT	TCT	1112	-341	chr11	94949463	94949721	+	6413	20.5649	19.7262	23.3429	21.2702	28.613	30.4363	80.3195	63.634	3	3	FALSE	0	FALSE	TRUE
ENSMUST00000001547	ENSMUSG00000001506	Col1a1	protein_coding	3490	cds	GGT	GAA	1115	-338	chr11	94949728	94949730	+	6414	40.032	40.4528	34.7524	56.8885	33.1414	43.39	133.42	115.237	3	3	FALSE	0	FALSE	TRUE
ENSMUST00000001547	ENSMUSG00000001506	Col1a1	protein_coding	3724	cds	CCT	CAA	1193	-260	chr11	94950371	94950373	+	6423	16.6571	14.6792	24.4952	28.807	22.9061	23.3533	75.0663	55.8315	3	3	FALSE	0	FALSE	TRUE
ENSMUST00000001547	ENSMUSG00000001506	Col1a1	protein_coding	3784	cds	CGT	GAC	1213	-240	chr11	94950431	94950433	+	6427	16.1029	11.6027	26.9149	13.6163	11.9214	19.9088	45.4465	54.6205	3	3	FALSE	0	FALSE	TRUE
ENSMUST00000001547	ENSMUSG00000001506	Col1a1	protein_coding	3943	cds	CCT	AAC	1266	-187	chr11	94950725	94950727	+	6434	41.059	17.4776	49.7583	22.6569	10.2809	23.034	55.9718	108.295	3	3	FALSE	0	FALSE	TRUE
ENSMUST00000001547	ENSMUSG00000001506	Col1a1	protein_coding	3946	cds	AAC	CAA	1267	-186	chr11	94950728	94950730	+	6435	20.2266	26.3188	21.8923	29.3056	20.2377	17.987	67.5303	68.4377	3	3	FALSE	0	FALSE	TRUE
ENSMUST00000001547	ENSMUSG00000001506	Col1a1	protein_coding	3961	cds	CTG	GAC	1272	-181	chr11	94950743	94950745	+	6436	26.4165	25.822	15.6109	32.304	25.5824	41.7826	99.669	67.8494	3	3	FALSE	0	FALSE	TRUE
ENSMUST00000001547	ENSMUSG00000001506	Col1a1	protein_coding	3994	cds	ACA	GGT	1283	-170	chr11	94950776	94950778	+	6438	13.3452	12.7841	14.0478	13.078	18.7379	19.7611	51.5769	40.1771	3	3	FALSE	0	FALSE	TRUE
ENSMUST00000001547	ENSMUSG00000001506	Col1a1	protein_coding	4036	cds	CAG	AAG	1297	-156	chr11	94950818	94950820	+	6441	21.1733	19.2556	21.2583	23.1626	19.7502	39.1441	82.0569	61.6872	3	3	FALSE	0	FALSE	TRUE
ENSMUST00000001547	ENSMUSG00000001506	Col1a1	protein_coding	4066	cds	AAG	GAA	1307	-146	chr11	94950848	94950850	+	6442	21.5248	22.9882	26.8112	37.4472	18.1666	25.6927	81.3065	71.3242	3	3	FALSE	0	FALSE	TRUE
ENSMUST00000001547	ENSMUSG00000001506	Col1a1	protein_coding	4162	cds	CAG	CTG	1339	-114	chr11	94951145	94951147	+	6450	10.3694	19.6013	10.7121	21.1369	20.8757	10.7242	52.7368	40.6828	3	3	FALSE	0	FALSE	TRUE
ENSMUST00000001547	ENSMUSG00000001506	Col1a1	protein_coding	4165	cds	CTG	ACC	1340	-113	chr11	94951148	94951150	+	6451	27.9749	25.8895	23.3805	41.0767	29.3236	56.1179	126.518	77.2448	3	3	FALSE	0	FALSE	TRUE
ENSMUST00000001547	ENSMUSG00000001506	Col1a1	protein_coding	4330	cds	ACC	TAC	1395	-58	chr11	94951313	94951315	+	6457	17.0016	10.1162	29.3001	11.0145	15.9026	17.5904	44.5075	56.4179	3	3	FALSE	0	FALSE	TRUE
ENSMUST00000001547	ENSMUSG00000001506	Col1a1	protein_coding	4429	cds	ATC	GAT	1428	-25	chr11	94951541	94951543	+	6461	11.6007	13.3641	15.3102	13.9996	20.1471	16.667	50.8137	40.275	3	3	FALSE	0	FALSE	TRUE
ENSMUST00000001547	ENSMUSG00000001506	Col1a1	protein_coding	4489	cds	CCT	GCC	1448	-5	chr11	94951601	94951603	+	6464	40.2572	26.3043	43.7438	52.8411	39.833	55.6624	148.336	110.305	3	3	FALSE	0	FALSE	TRUE
ENSMUST00000001547	ENSMUSG00000001506	Col1a1	protein_coding	4501	cds	GTG	NA	1452	-1	chr11	94951613	94951615	+	6465	121.781	172.405	106.803	122.361	63.2922	110.633	296.286	400.988	3	3	TRUE	0	FALSE	TRUE
ENSMUST00000033683	ENSMUSG00000031320	Rps4x	protein_coding	94	cds	ATG	GCT	0	-263	chrX	102189301	102189299	-	36659	108.143	105.303	78.5302	130.041	64.3562	79.3261	273.724	291.976	3	3	TRUE	0	FALSE	TRUE
ENSMUST00000033683	ENSMUSG00000031320	Rps4x	protein_coding	199	cds	CAC	AAG	35	-228	chrX	102187979	102187977	-	36656	32.8592	31.1762	41.7439	37.3015	12.9744	34.4168	84.6927	105.779	3	3	FALSE	0	FALSE	TRUE
ENSMUST00000033683	ENSMUSG00000031320	Rps4x	protein_coding	238	cds	AGG	AAC	48	-215	chrX	102187940	102187938	-	36655	21.5177	24.6286	35.7351	30.9862	18.1498	25.6732	74.8092	81.8815	3	3	FALSE	0	FALSE	TRUE
ENSMUST00000033683	ENSMUSG00000031320	Rps4x	protein_coding	241	cds	AAC	AGA	49	-214	chrX	102187937	102187935	-	36654	18.1022	15.6926	22.251	16.4133	11.8322	25.4541	53.6996	56.0457	3	3	FALSE	0	FALSE	TRUE
ENSMUST00000033683	ENSMUSG00000031320	Rps4x	protein_coding	247	cds	CTT	AAG	51	-212	chrX	102187931	102187929	-	36653	16.9366	17.8968	16.3562	21.5674	15.611	19.7104	56.8888	51.1896	3	3	FALSE	0	FALSE	TRUE
ENSMUST00000033683	ENSMUSG00000031320	Rps4x	protein_coding	430	cds	CGT	ATT	112	-151	chrX	102187379	102187377	-	36652	24.7722	27.3762	29.2122	30.1208	19.625	34.7033	84.4492	81.3606	3	3	FALSE	0	FALSE	TRUE
ENSMUST00000033683	ENSMUSG00000031320	Rps4x	protein_coding	736	cds	GGC	AAC	214	-49	chrX	102185551	102185549	-	36640	93.2124	98.2307	150.64	145.255	103.664	165.629	414.548	342.083	3	3	FALSE	0	FALSE	TRUE
ENSMUST00000033683	ENSMUSG00000031320	Rps4x	protein_coding	808	cds	CCC	AGA	238	-25	chrX	102185108	102185106	-	36637	13.2908	10.3841	12.7505	12.3504	18.3484	21.7162	52.4149	36.4254	3	3	FALSE	0	FALSE	TRUE
ENSMUST00000033598	ENSMUSG00000031246	Sh3bgrl	protein_coding	474	cds	TTT	GAA	82	-32	chrX	109154320	109154322	+	36730	53.0174	42.6138	52.0496	60.5658	26.2093	51.7961	138.571	147.681	3	3	FALSE	0	FALSE	TRUE
ENSMUST00000020372	ENSMUSG00000020163	Uqcr11	protein_coding	85	cds	ATG	CTG	0	-56	chr10	80406746	80406744	-	3227	27.9733	27.2545	22.9561	19.8382	29.5901	19.5867	69.015	78.1838	3	3	TRUE	0	FALSE	TRUE
ENSMUST00000028610	ENSMUSG00000027187	Cat	protein_coding	1589	cds	GGG	GCC	489	-38	chr2	103455129	103455127	-	19465	50.7232	70.5381	55.9066	83.8495	58.3655	59.8493	202.064	177.168	3	3	FALSE	0	FALSE	FALSE
ENSMUST00000111168	ENSMUSG00000027187	Cat	protein_coding	501	cds	GGG	GCC	138	-38	chr2	103455129	103455127	-	19465	51.0596	73.2796	58.3795	89.2415	61.7009	61.6667	212.609	182.719	3	3	FALSE	0	FALSE	FALSE
ENSMUST00000010974	ENSMUSG00000010830	Kdelr3	protein_coding	139	cds	ATG	AAC	0	-214	chr15	79516546	79516548	+	12225	17.3105	18.7066	21.788	13.5067	14.1421	11.3489	38.9977	57.8051	3	3	TRUE	0	FALSE	TRUE
ENSMUST00000106537	ENSMUSG00000034566	Atp5h	protein_coding	137	cds	ATG	GCT	0	-161	chr11	115418508	115418506	-	7155	33.6467	54.9675	26.3616	46.5907	38.0644	28.6957	113.351	114.976	3	3	TRUE	0	FALSE	FALSE
ENSMUST00000043931	ENSMUSG00000034566	Atp5h	protein_coding	80	cds	ATG	GCT	0	-161	chr11	115418508	115418506	-	7155	33.6467	54.9675	26.3616	46.5907	38.0644	28.6957	113.351	114.976	3	3	TRUE	0	FALSE	FALSE
ENSMUST00000073791	ENSMUSG00000034566	Atp5h	protein_coding	114	cds	ATG	GCT	0	-161	chr11	115418508	115418506	-	7155	15.6641	25.0125	11.4001	21.215	10.8335	13.6196	45.6681	52.0767	3	3	TRUE	0	FALSE	FALSE
ENSMUST00000137754	ENSMUSG00000034566	Atp5h	protein_coding	52	cds	ATG	GCT	0	-138	chr11	115418508	115418506	-	7155	17.67	27.5403	12.4556	23.4562	11.5673	14.8029	49.8264	57.6659	3	3	TRUE	0	FALSE	FALSE
ENSMUST00000160180	ENSMUSG00000024646	Cyb5a	protein_coding	540	cds	GAT	NA	133	-1	chr18	84879578	84879580	+	16711	38.9206	52.5095	52.8915	40.4575	14.3415	29.9764	84.7754	144.322	3	3	TRUE	0	FALSE	FALSE
ENSMUST00000163083	ENSMUSG00000024646	Cyb5a	protein_coding	392	cds	GAT	NA	109	-1	chr18	84879578	84879580	+	16711	43.6009	52.5095	56.9116	41.6576	15.1761	33.1667	90.0004	153.022	3	3	TRUE	0	FALSE	FALSE
ENSMUST00000016400	ENSMUSG00000016256	Ctsz	protein_coding	1056	cds	GTT	NA	305	-1	chr2	174427878	174427876	-	20658	20.27	32.0695	19.3412	35.8932	28.0254	18.4522	82.3708	71.6808	3	3	TRUE	0	FALSE	TRUE
ENSMUST00000054220	ENSMUSG00000045128	Rpl18a	protein_coding	36	cds	ATG	AAG	0	-176	chr8	70897408	70897406	-	32034	39.9325	82.4323	17.4445	55.9886	89.9426	43.7342	189.665	139.809	3	3	TRUE	0	FALSE	TRUE
ENSMUST00000054220	ENSMUSG00000045128	Rpl18a	protein_coding	111	cds	CCA	CTG	25	-151	chr8	70896287	70896285	-	32033	67.0695	72.2517	90.2684	91.2044	32.8475	48.9699	173.022	229.59	3	3	FALSE	0	FALSE	TRUE
ENSMUST00000054220	ENSMUSG00000045128	Rpl18a	protein_coding	114	cds	CTG	TAC	26	-150	chr8	70896284	70896282	-	32032	29.0531	12.0644	36.622	31.8591	20.9259	39.0155	91.8005	77.7395	3	3	FALSE	0	FALSE	TRUE
ENSMUST00000054220	ENSMUSG00000045128	Rpl18a	protein_coding	366	cds	CGA	GAC	110	-66	chr8	70895945	70895943	-	32028	18.6676	12.6755	28.7657	12.8775	11.8982	32.9921	57.7679	60.1088	3	3	FALSE	0	FALSE	TRUE
ENSMUST00000054220	ENSMUSG00000045128	Rpl18a	protein_coding	561	cds	TTC	NA	175	-1	chr8	70895452	70895450	-	32020	50.009	82.8565	43.731	58.0952	20.9976	39.7684	118.861	176.596	3	3	TRUE	0	FALSE	TRUE
ENSMUST00000089688	ENSMUSG00000000957	Mmp14	protein_coding	148	5utr	NA	NA	-107	-1855	chr14	54431751	54431753	+	10957	45.8242	36.6735	56.0468	25.8133	16.8023	31.6308	74.2464	138.545	3	3	FALSE	0	FALSE	TRUE
ENSMUST00000089688	ENSMUSG00000000957	Mmp14	protein_coding	254	cds	ATG	TCT	0	-582	chr14	54431857	54431859	+	10959	17.0239	15.2003	19.6325	18.126	26.0531	29.9657	74.1448	51.8568	3	3	TRUE	0	FALSE	TRUE
ENSMUST00000172107	ENSMUSG00000022403	St13	protein_coding	1559	cds	TCG	NA	370	-1	chr15	81365456	81365454	-	12343	45.3876	63.3522	48.6891	50.854	35.5406	51.9273	138.322	157.429	3	3	TRUE	0	FALSE	TRUE
ENSMUST00000165582	ENSMUSG00000022403	St13	protein_coding	447	cds	CAG	AAG	123	-6	chr15	81377783	81377781	-	12353	25.8607	15.9208	25.5566	13.4645	15.4057	26.4293	55.2995	67.3381	3	3	FALSE	0	FALSE	FALSE
ENSMUST00000022102	ENSMUSG00000021610	Clptm1l	protein_coding	724	cds	GAT	GAA	164	-375	chr13	73607754	73607756	+	9822	23.3643	26.4904	21.5465	18.0739	10.478	16.674	45.2259	71.4012	3	3	FALSE	0	FALSE	TRUE
ENSMUST00000044106	ENSMUSG00000039067	Psmd7	protein_coding	286	cds	GAT	GAA	58	-263	chr8	107586635	107586633	-	32662	22.5519	16.5715	27.6239	32.0842	15.2009	27.1981	74.4831	66.7472	3	3	FALSE	0	FALSE	TRUE
ENSMUST00000192615	ENSMUSG00000032562	Gnai2	protein_coding	746	cds	GGC	GTC	217	-138	chr9	107616486	107616484	-	34991	18.846	11.8333	17.6677	22.2285	18.5907	20.9137	61.7329	48.3471	3	3	FALSE	0	FALSE	FALSE
ENSMUST00000055704	ENSMUSG00000032562	Gnai2	protein_coding	801	cds	GGC	GTC	217	-138	chr9	107616486	107616484	-	34991	18.846	11.8333	17.6677	22.2285	18.5907	20.9137	61.7329	48.3471	3	3	FALSE	0	FALSE	FALSE
ENSMUST00000192837	ENSMUSG00000032562	Gnai2	protein_coding	15	5utr	NA	NA	-106	-363	chr9	107635323	107635321	-	35005	17.7542	19.5105	21.073	15.2086	19.1543	29.2289	63.5918	58.3377	3	3	FALSE	0	FALSE	FALSE
ENSMUST00000192837	ENSMUSG00000032562	Gnai2	protein_coding	120	cds	ATG	GGC	0	-85	chr9	107635218	107635216	-	35004	23.3941	34.5182	12.5964	23.3787	15.4392	11.0757	49.8935	70.5088	3	3	TRUE	0	FALSE	FALSE
ENSMUST00000193876	ENSMUSG00000032562	Gnai2	protein_coding	13	5utr	NA	NA	-67	-184	chr9	107635331	107635329	-	35006	17.9289	14.8597	17.8923	19.936	17.9196	25.3133	63.1688	50.6808	3	3	FALSE	0	FALSE	FALSE
ENSMUST00000193876	ENSMUSG00000032562	Gnai2	protein_coding	21	5utr	NA	NA	-59	-176	chr9	107635323	107635321	-	35005	16.0618	14.8597	23.3695	14.2114	13.435	25.9679	53.6143	54.291	3	3	FALSE	0	FALSE	FALSE
ENSMUST00000193876	ENSMUSG00000032562	Gnai2	protein_coding	79	cds	ATG	GGC	0	-38	chr9	107635218	107635216	-	35004	23.3941	34.5182	12.5964	23.3787	15.4392	11.0757	49.8935	70.5088	3	3	TRUE	0	FALSE	FALSE
ENSMUST00000041466	ENSMUSG00000034173	Zbed5	protein_coding	209	cds	GGC	TCA	43	-713	chr5	129899261	129899263	+	26016	16.5341	16.9353	18.4242	13.9586	23.389	20.1317	57.4793	51.8936	3	3	FALSE	0	FALSE	FALSE
ENSMUST00000041466	ENSMUSG00000034173	Zbed5	protein_coding	242	cds	CTG	ATG	54	-702	chr5	129899294	129899296	+	26017	10.9697	14.5935	10.036	18.3652	20.383	31.7442	70.4924	35.5992	3	3	FALSE	0	FALSE	FALSE
ENSMUST00000077320	ENSMUSG00000034173	Zbed5	protein_coding	245	cds	GGC	TCA	22	-161	chr5	129899261	129899263	+	26016	16.5341	16.9353	18.1729	13.9586	23.389	20.1317	57.4793	51.6422	3	3	FALSE	0	FALSE	FALSE
ENSMUST00000094280	ENSMUSG00000070493	Chchd2	protein_coding	352	cds	GGC	TCA	43	-110	chr5	129884105	129884103	-	26010	16.5341	16.9353	12.8088	13.9586	23.389	20.1317	57.4793	46.2781	3	3	FALSE	0	FALSE	TRUE
ENSMUST00000094280	ENSMUSG00000070493	Chchd2	protein_coding	679	cds	ATG	NA	152	-1	chr5	129881392	129881390	-	26005	56.2112	33.8375	65.8065	62.5329	22.9815	57.008	142.522	155.855	3	3	TRUE	0	FALSE	TRUE
ENSMUST00000036742	ENSMUSG00000039208	Metrnl	protein_coding	116	5utr	NA	NA	-100	-1035	chr11	121702526	121702528	+	7598	74.7421	99.7284	109.662	107.771	98.3646	126.394	332.529	284.133	3	3	FALSE	0	FALSE	TRUE
ENSMUST00000182097	ENSMUSG00000025027	Xpnpep1	protein_coding	16	5utr	NA	NA	-326	-682	chr19	53038545	53038543	-	18067	14.1088	12.6769	15.088	18.5458	16.7113	16.39	51.6471	41.8737	3	3	FALSE	0	FALSE	TRUE
ENSMUST00000036854	ENSMUSG00000040659	Efhd2	protein_coding	503	cds	CGG	GAG	150	-90	chr4	141861811	141861809	-	24378	28.1417	15.2911	32.4167	15.2798	13.1762	18.7974	47.2533	75.8494	3	3	FALSE	0	FALSE	TRUE
ENSMUST00000036854	ENSMUSG00000040659	Efhd2	protein_coding	770	cds	AAG	NA	239	-1	chr4	141859753	141859751	-	24377	41.8454	46.1375	37.1851	40.5435	21.7143	24.4099	86.6676	125.168	3	3	TRUE	0	FALSE	TRUE
ENSMUST00000166984	ENSMUSG00000028034	Fubp1	protein_coding	2094	cds	CAA	NA	641	-1	chr3	152232433	152232435	+	22539	14.2887	15.7014	21.9091	18.5	12.943	13.2673	44.7103	51.8991	3	3	TRUE	0	FALSE	TRUE
ENSMUST00000106121	ENSMUSG00000028034	Fubp1	protein_coding	1995	cds	CAA	NA	641	-1	chr3	152232397	152232399	+	22538	11.5333	13.7697	22.8063	20.9186	15.0735	10.6145	46.6066	48.1094	3	3	TRUE	0	FALSE	TRUE
ENSMUST00000048155	ENSMUSG00000010608	Rbm25	protein_coding	2692	cds	AAG	NA	837	-1	chr12	83681589	83681591	+	8256	23.3239	42.861	62.2259	38.7585	34.8266	58.7058	132.291	128.411	3	3	TRUE	0	FALSE	TRUE
ENSMUST00000148665	ENSMUSG00000020211	Sf3a2	protein_coding	645	cds	ATG	GAC	0	-485	chr10	80801232	80801234	+	3249	72.9703	74.03	69.2678	128.955	108.925	156.152	394.033	216.268	3	3	TRUE	0	FALSE	FALSE
ENSMUST00000151928	ENSMUSG00000020211	Sf3a2	protein_coding	111	cds	ATG	GAC	0	-194	chr10	80801232	80801234	+	3249	72.9703	71.4194	69.2678	112.11	97.7343	140.354	350.198	213.658	3	3	TRUE	0	FALSE	FALSE
ENSMUST00000147440	ENSMUSG00000020211	Sf3a2	protein_coding	171	cds	ATG	GAC	0	-66	chr10	80801232	80801234	+	3249	57.2663	62.4058	66.403	91.7362	73.1684	104.834	269.739	186.075	3	3	TRUE	0	FALSE	FALSE
ENSMUST00000109392	ENSMUSG00000031885	Cbfb	protein_coding	830	cds	CCC	NA	181	-1	chr8	105215975	105215977	+	32570	23.7091	25.2639	31.8986	34.4967	12.9768	28.9261	76.3995	80.8717	3	3	TRUE	0	FALSE	TRUE
ENSMUST00000034590	ENSMUSG00000032085	Tagln	protein_coding	237	cds	ATG	GCC	0	-201	chr9	45931762	45931760	-	33706	706.871	807.587	708.472	604.415	507.902	703.198	1815.52	2222.93	3	3	TRUE	0	FALSE	TRUE
ENSMUST00000034590	ENSMUSG00000032085	Tagln	protein_coding	354	cds	CCT	GAT	39	-162	chr9	45931645	45931643	-	33704	24.5381	23.0205	31.6279	17.577	33.522	32.2525	83.3514	79.1865	3	3	FALSE	0	FALSE	TRUE
ENSMUST00000034590	ENSMUSG00000032085	Tagln	protein_coding	447	cds	CCT	GAG	70	-131	chr9	45931448	45931446	-	33699	28.7844	29.8754	33.2811	21.2567	10.9609	13.1294	45.3469	91.9408	3	3	FALSE	0	FALSE	TRUE
ENSMUST00000034590	ENSMUSG00000032085	Tagln	protein_coding	549	cds	GGA	GTC	104	-97	chr9	45931346	45931344	-	33697	16.2445	10.7508	13.4434	19.7368	15.497	11.422	46.6557	40.4388	3	3	FALSE	0	FALSE	TRUE
ENSMUST00000034590	ENSMUSG00000032085	Tagln	protein_coding	747	cds	GGG	AAG	170	-31	chr9	45930467	45930465	-	33688	34.1297	23.7299	17.2241	28.9064	10.0059	30.7158	69.6281	75.0837	3	3	FALSE	0	FALSE	TRUE
ENSMUST00000034590	ENSMUSG00000032085	Tagln	protein_coding	789	cds	GCC	TCG	184	-17	chr9	45930425	45930423	-	33684	25.9745	15.64	35.7714	23.5124	26.2495	31.8642	81.6261	77.3859	3	3	FALSE	0	FALSE	TRUE
ENSMUST00000034590	ENSMUSG00000032085	Tagln	protein_coding	837	cds	AGT	NA	200	-1	chr9	45930377	45930375	-	33682	26.1968	39.092	16.5513	28.6962	11.7965	14.4953	54.9879	81.8401	3	3	TRUE	0	FALSE	TRUE
ENSMUST00000029142	ENSMUSG00000027613	Eif6	protein_coding	1224	cds	ACA	NA	244	-1	chr2	155820108	155820106	-	20368	105.649	102.052	162.384	124.957	81.7811	115.252	321.99	370.085	3	3	TRUE	0	FALSE	TRUE
ENSMUST00000029574	ENSMUSG00000027962	Vcam1	protein_coding	744	cds	ATT	TAC	141	-598	chr3	116126193	116126191	-	22226	23.6714	16.3169	23.4684	16.7841	11.2286	26.541	54.5538	63.4567	3	3	FALSE	0	FALSE	TRUE
ENSMUST00000029574	ENSMUSG00000027962	Vcam1	protein_coding	2535	cds	GTG	NA	738	-1	chr3	116110883	116110881	-	22220	14.8613	21.8719	17.9556	18.9541	12.0455	23.3774	54.377	54.6888	3	3	TRUE	0	FALSE	TRUE
ENSMUST00000093120	ENSMUSG00000031948	Kars	protein_coding	523	cds	GGG	GAC	144	-480	chr8	112003334	112003332	-	32770	33.3711	74.8777	45.5043	91.3554	38.2109	89.595	219.161	153.753	3	3	FALSE	0	FALSE	TRUE
ENSMUST00000093120	ENSMUSG00000031948	Kars	protein_coding	1213	cds	CAT	GAC	374	-250	chr8	111998859	111998857	-	32762	22.1938	26.5012	48.3322	40.4931	30.1567	46.8688	117.519	97.0272	3	3	FALSE	0	FALSE	TRUE
ENSMUST00000164470	ENSMUSG00000031948	Kars	protein_coding	581	cds	GGG	GAC	144	-480	chr8	112003312	112003310	-	32769	33.3711	74.8777	45.5043	91.3554	38.2109	89.595	219.161	153.753	3	3	FALSE	0	FALSE	FALSE
ENSMUST00000164470	ENSMUSG00000031948	Kars	protein_coding	1271	cds	CAT	GAC	374	-250	chr8	111998837	111998835	-	32761	22.1938	26.5012	48.3322	40.4931	30.1567	46.8688	117.519	97.0272	3	3	FALSE	0	FALSE	FALSE
ENSMUST00000034426	ENSMUSG00000031948	Kars	protein_coding	400	cds	GGG	GAC	115	-480	chr8	112003312	112003310	-	32769	33.3711	74.8777	45.5043	91.3554	38.2109	89.595	219.161	153.753	3	3	FALSE	0	FALSE	FALSE
ENSMUST00000034426	ENSMUSG00000031948	Kars	protein_coding	1090	cds	CAT	GAC	345	-250	chr8	111998837	111998835	-	32761	22.1938	26.5012	48.3322	40.4931	30.1567	46.8688	117.519	97.0272	3	3	FALSE	0	FALSE	FALSE
ENSMUST00000102611	ENSMUSG00000020900	Myh10	protein_coding	299	cds	ATG	GCC	0	-1976	chr11	68699240	68699242	+	5413	32.9066	34.2194	21.6486	23.0127	30.0378	29.2566	82.3071	88.7746	3	3	TRUE	0	FALSE	FALSE
ENSMUST00000102611	ENSMUSG00000020900	Myh10	protein_coding	1835	cds	CTG	GAC	512	-1464	chr11	68768333	68768335	+	5422	23.0374	24.1124	51.3085	23.6403	10.6145	41.9283	76.183	98.4583	3	3	FALSE	0	FALSE	FALSE
ENSMUST00000018887	ENSMUSG00000020900	Myh10	protein_coding	102	cds	ATG	GCC	0	-2007	chr11	68699240	68699242	+	5413	32.9066	34.2194	21.9527	23.0127	30.0378	29.2566	82.3071	89.0787	3	3	TRUE	0	FALSE	FALSE
ENSMUST00000018887	ENSMUSG00000020900	Myh10	protein_coding	1668	cds	CTG	GAC	522	-1485	chr11	68768333	68768335	+	5422	23.0374	24.1124	51.3085	23.6403	10.6145	41.9283	76.183	98.4583	3	3	FALSE	0	FALSE	FALSE
ENSMUST00000108673	ENSMUSG00000020900	Myh10	protein_coding	133	cds	ATG	GCC	0	-231	chr11	68699240	68699242	+	5413	32.9066	34.2194	21.7668	23.0127	30.0378	29.2566	82.3071	88.8928	3	3	TRUE	0	FALSE	FALSE
ENSMUST00000092984	ENSMUSG00000020900	Myh10	protein_coding	275	cds	ATG	GCC	37	-1976	chr11	68699240	68699242	+	5413	32.9066	34.2194	21.8878	23.0127	30.0378	29.2566	82.3071	89.0138	3	3	TRUE	0	FALSE	FALSE
ENSMUST00000092984	ENSMUSG00000020900	Myh10	protein_coding	1811	cds	CTG	GAC	549	-1464	chr11	68768333	68768335	+	5422	23.0374	24.1124	51.3085	23.6403	10.6145	41.9283	76.183	98.4583	3	3	FALSE	0	FALSE	FALSE
ENSMUST00000022380	ENSMUSG00000021832	Psmc6	protein_coding	60	cds	ATG	GCG	0	-389	chr14	45329883	45329885	+	10781	21.7443	16.5163	30.2075	19.3645	10.8669	17.3747	47.6061	68.4681	3	3	TRUE	0	FALSE	TRUE
ENSMUST00000022380	ENSMUSG00000021832	Psmc6	protein_coding	921	cds	GCT	TTG	287	-102	chr14	45343520	45343647	+	10788	17.2747	28.6436	21.3475	45.1491	17.8095	13.6158	76.5744	67.2658	3	3	FALSE	0	FALSE	TRUE
ENSMUST00000022380	ENSMUSG00000021832	Psmc6	protein_coding	1224	cds	GTG	NA	388	-1	chr14	45348731	45348733	+	10789	29.5657	38.3333	43.346	44.0707	50.7606	40.8202	135.651	111.245	3	3	TRUE	0	FALSE	TRUE
ENSMUST00000037353	ENSMUSG00000034457	Eda2r	protein_coding	162	5utr	NA	NA	-63	-956	chrX	97371210	97371208	-	36582	31.4374	36.1876	38.8018	19.4828	15.0493	33.6767	68.2088	106.427	3	3	FALSE	0	FALSE	FALSE
ENSMUST00000113832	ENSMUSG00000034457	Eda2r	protein_coding	141	5utr	NA	NA	-63	-956	chrX	97371210	97371208	-	36582	31.4374	36.1876	38.8018	19.4828	15.0493	33.6767	68.2088	106.427	3	3	FALSE	0	FALSE	FALSE
ENSMUST00000024599	ENSMUSG00000023830	Igf2r	protein_coding	722	cds	CCT	GAC	197	-2286	chr17	12736007	12736005	-	14300	10.7288	20.5061	19.2089	15.6159	10.248	13.0985	38.9624	50.4438	3	3	FALSE	0	FALSE	TRUE
ENSMUST00000024599	ENSMUSG00000023830	Igf2r	protein_coding	1232	cds	CTC	TGT	367	-2116	chr17	12726285	12726283	-	14297	20.1745	13.5303	11.5797	27.1774	16.5291	29.3667	73.0731	45.2844	3	3	FALSE	0	FALSE	TRUE
ENSMUST00000029490	ENSMUSG00000027893	Ahcyl1	protein_coding	1870	cds	TAC	NA	529	-1	chr3	107665113	107665111	-	22077	38.2109	30.7539	68	27.0254	29.731	37.65	94.4064	136.965	3	3	TRUE	0	FALSE	TRUE
ENSMUST00000002090	ENSMUSG00000002014	Ssr4	protein_coding	562	cds	CCC	CTG	128	-44	chrX	73790394	73790396	+	36113	17.4763	21.9992	21.3597	28.5832	10	14.2264	52.8096	60.8351	3	3	FALSE	0	FALSE	FALSE
ENSMUST00000017572	ENSMUSG00000017428	Psmd11	protein_coding	1303	cds	ACA	NA	421	-1	chr11	80471588	80471590	+	6093	46.4144	37.5875	43.6826	70.2125	17.7932	40.987	128.993	127.684	3	3	TRUE	0	FALSE	FALSE
ENSMUST00000148895	ENSMUSG00000017428	Psmd11	protein_coding	624	cds	ACA	NA	208	-1	chr11	80471588	80471590	+	6093	45.9613	36.3551	42.8063	65.6731	17.3505	37.9106	120.934	125.123	3	3	TRUE	0	FALSE	FALSE
ENSMUST00000126610	ENSMUSG00000038900	Rpl12	protein_coding	265	cds	AAC	GAG	7	-158	chr2	32961823	32961825	+	18776	33.1052	48.7888	70.458	62.9169	39.4529	78.2005	180.57	152.352	3	3	FALSE	0	FALSE	TRUE
ENSMUST00000126610	ENSMUSG00000038900	Rpl12	protein_coding	370	cds	GGC	GAT	42	-123	chr2	32962588	32962590	+	18778	11.374	12.0239	10.5142	14.3042	11.1835	18.5195	44.0072	33.9121	3	3	FALSE	0	FALSE	TRUE
ENSMUST00000126610	ENSMUSG00000038900	Rpl12	protein_coding	373	cds	GAT	GAC	43	-122	chr2	32962591	32962593	+	18780	13.7808	14.639	22.5114	16.2122	15.6965	18.3333	50.242	50.9312	3	3	FALSE	0	FALSE	TRUE
ENSMUST00000126610	ENSMUSG00000038900	Rpl12	protein_coding	586	cds	CAG	ATG	114	-51	chr2	32963546	32963548	+	18793	11.5459	12.8756	18.4027	10.2759	31.1616	29.6626	71.1001	42.8243	3	3	FALSE	0	FALSE	TRUE
ENSMUST00000126610	ENSMUSG00000038900	Rpl12	protein_coding	589	cds	ATG	AGA	115	-50	chr2	32963549	32963551	+	18796	19.4538	23.4646	18.8958	13.4164	16.4305	20.5192	50.3661	61.8142	3	3	FALSE	0	FALSE	FALSE
ENSMUST00000126610	ENSMUSG00000038900	Rpl12	protein_coding	736	cds	AGT	NA	164	-1	chr2	32963853	32963992	+	18803	24.783	29.349	41.5754	41.9063	39.8919	29.3032	111.101	95.7075	3	3	TRUE	0	FALSE	FALSE
ENSMUST00000032824	ENSMUSG00000030603	Psmc4	protein_coding	515	cds	CCC	GAG	144	-274	chr7	28047403	28047401	-	29168	20.129	14.2083	17.0605	25.4427	19.4809	20.1859	65.1095	51.3978	3	3	FALSE	0	FALSE	TRUE
ENSMUST00000140053	ENSMUSG00000030603	Psmc4	protein_coding	369	cds	CCC	GAG	113	-274	chr7	28042965	28042963	-	29166	20.129	14.2083	17.4549	25.9556	19.4809	20.1859	65.6223	51.7922	3	3	FALSE	0	FALSE	TRUE
ENSMUST00000028135	ENSMUSG00000026796	Fam129b	protein_coding	2003	cds	GGC	GAA	589	-160	chr2	32923543	32923545	+	18768	43.0833	81.085	55.1755	57.8448	26.3631	60.0362	144.244	179.344	3	3	FALSE	0	FALSE	TRUE
ENSMUST00000028135	ENSMUSG00000026796	Fam129b	protein_coding	2480	cds	TTC	NA	748	-1	chr2	32924020	32924022	+	18771	21.0432	24.2748	39.3657	23.0127	19.8737	17.8885	60.775	84.6838	3	3	TRUE	0	FALSE	TRUE
ENSMUST00000164980	ENSMUSG00000004530	Coro1c	nonsense_mediated_decay	367	cds	CCA	CAT	89	-70	chr5	113865690	113865688	-	25636	11.7493	13.404	18.5445	14.634	11.5756	19.529	45.7386	43.6978	3	3	FALSE	0	FALSE	FALSE
ENSMUST00000004646	ENSMUSG00000004530	Coro1c	protein_coding	420	cds	CCA	CAT	89	-385	chr5	113865690	113865688	-	25636	11.7493	13.404	18.5445	14.634	11.5756	19.529	45.7386	43.6978	3	3	FALSE	0	FALSE	FALSE
ENSMUST00000004646	ENSMUSG00000004530	Coro1c	protein_coding	918	cds	CCA	ATT	255	-219	chr5	113848617	113848615	-	25632	30.1672	23.612	39.1039	42.5746	20.181	31.8535	94.6092	92.8831	3	3	FALSE	0	FALSE	TRUE
ENSMUST00000022340	ENSMUSG00000021806	Nid2	protein_coding	2164	cds	TCA	GTC	697	-706	chr14	19779725	19779727	+	10445	35.1637	51.5373	51.5	44.9363	52.4723	43.9714	141.38	138.201	3	3	FALSE	0	FALSE	TRUE
ENSMUST00000042850	ENSMUSG00000028369	Svep1	protein_coding	8080	cds	GGT	GAC	2620	-947	chr4	58069925	58069923	-	23056	24.9246	47.8263	13.6777	67.8408	54.2906	38.4983	160.63	86.4286	3	3	FALSE	0	FALSE	TRUE
ENSMUST00000121111	ENSMUSG00000028641	P3h1	protein_coding	1221	cds	GAC	TCA	393	-346	chr4	119241206	119241483	+	23618	20.0832	23.9806	37.3333	26.9537	21.0809	42.9226	90.9572	81.3971	3	3	FALSE	0	FALSE	FALSE
ENSMUST00000121111	ENSMUSG00000028641	P3h1	protein_coding	1863	cds	CCA	GCC	607	-132	chr4	119246726	119246728	+	23621	39.1333	53.6421	75.3756	60.6003	27.8133	52.9308	141.344	168.151	3	3	FALSE	0	FALSE	FALSE
ENSMUST00000121111	ENSMUSG00000028641	P3h1	protein_coding	2256	cds	CTA	NA	738	-1	chr4	119248040	119248042	+	23628	29.6754	35.0457	43.4295	18.0068	20.1192	27.4096	65.5356	108.151	3	3	TRUE	0	FALSE	FALSE
ENSMUST00000030393	ENSMUSG00000028641	P3h1	protein_coding	1197	cds	GAC	TCA	393	-353	chr4	119241206	119241483	+	23618	20.0832	23.9806	37.3333	27.3409	21.3666	43.5705	92.278	81.3971	3	3	FALSE	0	FALSE	FALSE
ENSMUST00000030393	ENSMUSG00000028641	P3h1	protein_coding	1860	cds	CCA	GCC	614	-132	chr4	119246726	119246728	+	23621	39.1333	53.6421	75.3756	60.6003	28.182	52.9308	141.713	168.151	3	3	FALSE	0	FALSE	FALSE
ENSMUST00000030393	ENSMUSG00000028641	P3h1	protein_coding	2253	cds	CTA	NA	745	-1	chr4	119248040	119248042	+	23628	30.0769	35.0457	44.0506	18.1333	20.3929	27.8366	66.3629	109.173	3	3	TRUE	0	FALSE	FALSE
ENSMUST00000102662	ENSMUSG00000028641	P3h1	protein_coding	1190	cds	GAC	TCA	393	-355	chr4	119241206	119241483	+	23618	20.0832	23.9806	37.3333	28.5113	22.3602	45.0729	95.9445	81.3971	3	3	FALSE	0	FALSE	FALSE
ENSMUST00000102662	ENSMUSG00000028641	P3h1	protein_coding	1832	cds	CCA	GCC	607	-141	chr4	119246726	119246728	+	23621	39.1333	53.6421	75.3756	60.6003	29	52.9308	142.531	168.151	3	3	FALSE	0	FALSE	FALSE
ENSMUST00000081606	ENSMUSG00000028641	P3h1	protein_coding	852	cds	GAC	TCA	214	-346	chr4	119241206	119241483	+	23618	20.0832	23.9806	36.502	26.6121	20.5902	41.3139	88.5162	80.5657	3	3	FALSE	0	FALSE	FALSE
ENSMUST00000081606	ENSMUSG00000028641	P3h1	protein_coding	1494	cds	CCA	GCC	428	-132	chr4	119246726	119246728	+	23621	39.1333	53.6421	75.3756	60.6003	27.1801	51.0412	138.822	168.151	3	3	FALSE	0	FALSE	FALSE
ENSMUST00000081606	ENSMUSG00000028641	P3h1	protein_coding	1887	cds	CTA	NA	559	-1	chr4	119248040	119248042	+	23628	28.7938	35.0457	40.6162	17.7659	19.6488	26.3488	63.7636	104.456	3	3	TRUE	0	FALSE	FALSE
ENSMUST00000018506	ENSMUSG00000018362	Kpna2	protein_coding	206	cds	ATG	TCC	0	-529	chr11	106997313	106997311	-	7107	33.3687	43.1335	28.6532	32.0925	21.8765	20.7584	74.7274	105.155	3	3	TRUE	0	FALSE	FALSE
ENSMUST00000124541	ENSMUSG00000018362	Kpna2	protein_coding	148	cds	ATG	TCC	0	-169	chr11	106997313	106997311	-	7107	31.5658	46.9899	29.1664	38.5271	20.3217	24.8744	83.7231	107.722	3	3	TRUE	0	FALSE	FALSE
ENSMUST00000140362	ENSMUSG00000018362	Kpna2	protein_coding	57	cds	ATG	TCC	19	-169	chr11	106997313	106997311	-	7107	34.1668	45.4793	33.0681	39.1479	21.9594	24.2703	85.3775	112.714	3	3	TRUE	0	FALSE	FALSE
ENSMUST00000144834	ENSMUSG00000018362	Kpna2	protein_coding	241	cds	ATG	TCC	0	-163	chr11	106997313	106997311	-	7107	36.0971	40.5831	29.9629	35.1768	21.0426	22.2251	78.4445	106.643	3	3	TRUE	0	FALSE	FALSE
ENSMUST00000106768	ENSMUSG00000018362	Kpna2	protein_coding	34	cds	ATG	TCC	0	-80	chr11	106997313	106997311	-	7107	36.6639	47.2161	35.7855	46.5054	27.2186	25.9689	99.6929	119.666	3	3	TRUE	0	FALSE	FALSE
ENSMUST00000019128	ENSMUSG00000000568	Hnrnpd	protein_coding	1228	cds	TAC	NA	305	-1	chr5	99962551	99962549	-	25456	21.7591	18.6191	25.3772	37.1939	11.2286	13.6183	62.0407	65.7553	3	3	TRUE	0	FALSE	FALSE
ENSMUST00000112939	ENSMUSG00000000568	Hnrnpd	protein_coding	1298	cds	TAC	NA	335	-1	chr5	99962551	99962549	-	25456	28.9953	20.0189	27.5514	33.5302	10.9109	12.6667	57.1078	76.5657	3	3	TRUE	0	FALSE	FALSE
ENSMUST00000072750	ENSMUSG00000000568	Hnrnpd	protein_coding	1169	cds	TAC	NA	286	-1	chr5	99962551	99962549	-	25456	22.6323	11.2887	23.6714	31.4189	11.2268	13.663	56.3087	57.5923	3	3	TRUE	0	FALSE	FALSE
ENSMUST00000171640	ENSMUSG00000000568	Hnrnpd	nonsense_mediated_decay	447	cds	TAC	NA	149	-1	chr5	99962551	99962549	-	25456	33.4717	16.2207	21.7258	38.7689	15.3606	16.5715	70.701	71.4181	3	3	TRUE	0	FALSE	FALSE
ENSMUST00000164833	ENSMUSG00000000568	Hnrnpd	nonsense_mediated_decay	390	cds	TAC	NA	130	-1	chr5	99962551	99962549	-	25456	30.2964	17.1337	24.5968	36.2374	12.5965	13.9058	62.7397	72.0268	3	3	TRUE	0	FALSE	FALSE
ENSMUST00000022704	ENSMUSG00000022108	Itm2b	protein_coding	163	cds	ATG	GTG	0	-266	chr14	73385109	73385107	-	11235	108.832	100.081	86.1582	81.2205	91.2343	78.6777	251.132	295.071	3	3	TRUE	0	FALSE	TRUE
ENSMUST00000022704	ENSMUSG00000022108	Itm2b	protein_coding	286	cds	GGT	GAC	41	-225	chr14	73368404	73368402	-	11234	54.6052	78.626	64.743	74.7642	28.8472	51.1327	154.744	197.974	3	3	FALSE	0	FALSE	TRUE
ENSMUST00000022704	ENSMUSG00000022108	Itm2b	protein_coding	922	cds	TTT	GAG	253	-13	chr14	73363082	73363080	-	11225	13.1761	17.871	13.0583	13.6138	12.8016	16.9411	43.3565	44.1054	3	3	FALSE	0	FALSE	TRUE
ENSMUST00000022704	ENSMUSG00000022108	Itm2b	protein_coding	958	cds	TCT	NA	265	-1	chr14	73363046	73363044	-	11224	32.2638	50.1534	44.7692	54.9502	28.1501	49.8041	132.904	127.186	3	3	TRUE	0	FALSE	TRUE
ENSMUST00000031654	ENSMUSG00000029649	Pomp	protein_coding	588	cds	CCA	TCA	120	-21	chr5	147875632	147875634	+	26697	19.0326	15.6679	30.3169	14.3639	11.4513	23.3916	49.2068	65.0175	3	3	FALSE	0	FALSE	TRUE
ENSMUST00000031654	ENSMUSG00000029649	Pomp	protein_coding	648	cds	CTG	NA	140	-1	chr5	147875692	147875694	+	26698	14.3321	42.9616	11.7166	29.4338	14.0926	19.8114	63.3378	69.0103	3	3	TRUE	0	FALSE	TRUE
ENSMUST00000142643	ENSMUSG00000058600	Rpl30	protein_coding	332	cds	GGC	AAT	54	-40	chr15	34441305	34441303	-	11656	15.9695	20.3958	13.3969	20.7759	25.5413	17.7211	64.0383	49.7623	3	3	FALSE	0	FALSE	FALSE
ENSMUST00000142643	ENSMUSG00000058600	Rpl30	protein_coding	404	cds	GGT	GAT	78	-16	chr15	34440604	34441232	-	11655	109.736	139.051	113.069	170.106	70.6044	127.28	367.99	361.855	3	3	FALSE	0	FALSE	FALSE
ENSMUST00000142643	ENSMUSG00000058600	Rpl30	protein_coding	449	cds	AAG	NA	93	-1	chr15	34440561	34440559	-	11653	28.2361	33.8062	15.7207	32.1354	20.8795	23.2631	76.278	77.763	3	3	TRUE	0	FALSE	FALSE
ENSMUST00000079735	ENSMUSG00000058600	Rpl30	protein_coding	713	cds	GGC	AAT	75	-40	chr15	34441305	34441303	-	11656	17.2284	21.8735	14.8147	22.5564	26.9581	18.9554	68.4699	53.9165	3	3	FALSE	0	FALSE	FALSE
ENSMUST00000079735	ENSMUSG00000058600	Rpl30	protein_coding	785	cds	GGT	GAT	99	-16	chr15	34440604	34441232	-	11655	109.736	139.051	113.069	179.016	73.5587	127.28	379.855	361.855	3	3	FALSE	0	FALSE	FALSE
ENSMUST00000079735	ENSMUSG00000058600	Rpl30	protein_coding	830	cds	AAG	NA	114	-1	chr15	34440561	34440559	-	11653	30.0038	35.8382	15.7207	34.4582	22.1111	24.7119	81.2811	81.5626	3	3	TRUE	0	FALSE	FALSE
ENSMUST00000009039	ENSMUSG00000058600	Rpl30	protein_coding	402	cds	GGC	AAT	75	-40	chr15	34441305	34441303	-	11656	17.2284	21.8735	14.8147	22.5564	26.9581	18.9554	68.4699	53.9165	3	3	FALSE	0	FALSE	FALSE
ENSMUST00000009039	ENSMUSG00000058600	Rpl30	protein_coding	474	cds	GGT	GAT	99	-16	chr15	34440604	34441232	-	11655	109.736	139.051	113.069	179.016	73.5587	127.28	379.855	361.855	3	3	FALSE	0	FALSE	FALSE
ENSMUST00000009039	ENSMUSG00000058600	Rpl30	protein_coding	519	cds	AAG	NA	114	-1	chr15	34440561	34440559	-	11653	30.0038	35.8382	15.7207	34.4582	22.1111	24.7119	81.2811	81.5626	3	3	TRUE	0	FALSE	FALSE
ENSMUST00000022341	ENSMUSG00000021807	Rtraf	protein_coding	95	cds	ATG	TTC	0	-244	chr14	19823729	19823727	-	10455	28.1624	48.777	34.0393	24.5137	18.3567	22.7586	65.629	110.979	3	3	TRUE	0	FALSE	TRUE
ENSMUST00000022341	ENSMUSG00000021807	Rtraf	protein_coding	263	cds	CCC	AAG	56	-188	chr14	19822583	19822581	-	10454	35.6965	59.9637	58.8055	53.5744	13.5	29.673	96.7474	154.466	3	3	FALSE	0	FALSE	TRUE
ENSMUST00000059472	ENSMUSG00000053907	Mat2a	protein_coding	122	cds	ATG	AAC	0	-395	chr6	72439437	72439435	-	27579	77.5261	76.9775	84.8246	71.663	16.3974	35.3693	123.43	239.328	3	3	TRUE	0	FALSE	TRUE
ENSMUST00000030367	ENSMUSG00000061887	Ssbp3	protein_coding	387	cds	ATG	TTT	0	-388	chr4	106911856	106911858	+	23388	36.9722	39.6943	77.6652	43.7811	33.4716	45.7473	123	154.332	3	3	TRUE	0	FALSE	FALSE
ENSMUST00000149926	ENSMUSG00000061887	Ssbp3	protein_coding	346	cds	ATG	TTT	0	-225	chr4	106911856	106911858	+	23388	36.9483	39.226	76.1989	42.5664	31.0923	45.5788	119.238	152.373	3	3	TRUE	0	FALSE	FALSE
ENSMUST00000072753	ENSMUSG00000061887	Ssbp3	protein_coding	324	cds	ATG	TTT	0	-361	chr4	106911856	106911858	+	23388	35.2294	37.5761	74.3337	41.8522	32.1005	43.5242	117.477	147.139	3	3	TRUE	0	FALSE	FALSE
ENSMUST00000097934	ENSMUSG00000061887	Ssbp3	protein_coding	190	cds	ATG	TTT	0	-368	chr4	106911856	106911858	+	23388	37.1168	39.5749	76.8176	43.511	33.4251	45.8798	122.816	153.509	3	3	TRUE	0	FALSE	FALSE
ENSMUST00000043235	ENSMUSG00000040843	Tiprl	protein_coding	815	cds	AAT	GAA	235	-36	chr1	165215851	165215849	-	1938	15.5885	15.8796	32.4714	22.7167	12.2275	24.0122	58.9564	63.9395	3	3	FALSE	0	FALSE	TRUE
ENSMUST00000150350	ENSMUSG00000074129	Rpl13a	protein_coding	221	cds	CGG	AAG	58	-145	chr7	45127060	45127058	-	29615	16.2504	13.7227	18.1659	20.7993	10.2765	10.6028	41.6787	48.139	3	3	FALSE	0	FALSE	TRUE
ENSMUST00000150350	ENSMUSG00000074129	Rpl13a	protein_coding	371	cds	CCT	CCA	108	-95	chr7	45126714	45126712	-	29613	30.3225	19.9026	18.3062	28.6108	18.3631	30.6863	77.6602	68.5313	3	3	FALSE	0	FALSE	TRUE
ENSMUST00000150350	ENSMUSG00000074129	Rpl13a	protein_coding	653	cds	GTG	NA	202	-1	chr7	45125939	45125937	-	29606	123.758	111.964	137.958	144.891	34.8514	118.226	297.969	373.68	3	3	TRUE	0	FALSE	TRUE
ENSMUST00000164181	ENSMUSG00000090841	Myl6	protein_coding	64	cds	ATG	TGT	0	-151	chr10	128493812	128493810	-	4213	123.812	138.72	130.353	117.98	94.0067	117.587	329.574	392.885	3	3	TRUE	0	FALSE	TRUE
ENSMUST00000164181	ENSMUSG00000090841	Myl6	protein_coding	67	cds	TGT	GAC	1	-150	chr10	128493566	128493809	-	4212	63.4708	51.3338	65.1088	61.0672	35.306	76.0822	172.455	179.913	3	3	TRUE	0	FALSE	TRUE
ENSMUST00000164181	ENSMUSG00000090841	Myl6	protein_coding	382	cds	GCT	GAA	106	-45	chr10	128492260	128492258	-	4203	37.5487	37.6276	36.2671	24.4833	19.568	28.3471	72.3984	111.443	3	3	FALSE	0	FALSE	TRUE
ENSMUST00000164181	ENSMUSG00000090841	Myl6	protein_coding	400	cds	CTA	GTC	112	-39	chr10	128492242	128492240	-	4202	18.5861	23.9712	21.5278	26.562	13.1416	16.1189	55.8225	64.0851	3	3	FALSE	0	FALSE	TRUE
ENSMUST00000164181	ENSMUSG00000090841	Myl6	protein_coding	514	cds	GGC	NA	150	-1	chr10	128491011	128491009	-	4199	124.769	164.537	209.007	141.234	99.362	188.745	429.341	498.313	3	3	TRUE	0	FALSE	TRUE
ENSMUST00000027174	ENSMUSG00000026020	Nop58	protein_coding	1219	cds	GGA	CTT	338	-106	chr1	59705699	59705701	+	606	88.6474	99.7286	116.17	133.711	84.6932	114.723	333.128	304.546	3	3	FALSE	0	FALSE	FALSE
ENSMUST00000191142	ENSMUSG00000026020	Nop58	protein_coding	1187	cds	GGA	CTT	338	-198	chr1	59705699	59705701	+	606	91.6076	99.7286	116.17	133.711	84.7828	114.723	333.217	307.506	3	3	FALSE	0	FALSE	FALSE
ENSMUST00000187837	ENSMUSG00000026020	Nop58	protein_coding	87	cds	TTA	CAG	29	-183	chr1	59704699	59704701	+	603	11.5718	11.2816	17.9947	19.0794	10.6001	21.1054	50.7849	40.8481	3	3	FALSE	0	FALSE	TRUE
ENSMUST00000187837	ENSMUSG00000026020	Nop58	protein_coding	243	cds	ATG	GAC	81	-131	chr1	59705697	59705699	+	605	16.8191	18.783	12.0364	25.1093	17.9629	20.4101	63.4823	47.6385	3	3	FALSE	0	FALSE	FALSE
ENSMUST00000187837	ENSMUSG00000026020	Nop58	protein_coding	246	cds	GAC	TTA	82	-130	chr1	59705700	59705702	+	607	54.294	56.6392	87.2439	76.19	43.9524	71.3093	191.452	198.177	3	3	FALSE	0	FALSE	FALSE
ENSMUST00000188390	ENSMUSG00000026020	Nop58	protein_coding	147	cds	ATG	GAC	49	-145	chr1	59705697	59705699	+	605	16.8191	18.7117	12.0364	25.1093	17.9629	20.4101	63.4823	47.5672	3	3	FALSE	0	FALSE	FALSE
ENSMUST00000188390	ENSMUSG00000026020	Nop58	protein_coding	150	cds	GAC	TTA	50	-144	chr1	59705700	59705702	+	607	54.294	56.6392	87.2439	76.19	43.9524	71.3093	191.452	198.177	3	3	FALSE	0	FALSE	FALSE
ENSMUST00000097561	ENSMUSG00000026421	Csrp1	protein_coding	356	cds	CAG	GGC	74	-119	chr1	135745368	135745370	+	1630	24.6577	15.4861	28.0786	15.3627	11.3121	22.4905	49.1653	68.2224	3	3	FALSE	0	FALSE	FALSE
ENSMUST00000027677	ENSMUSG00000026421	Csrp1	protein_coding	129	cds	ATG	CCA	0	-193	chr1	135739400	135739402	+	1627	147.016	145.097	165.227	141.823	70.1668	140.799	352.789	457.339	3	3	TRUE	0	FALSE	TRUE
ENSMUST00000007012	ENSMUSG00000006818	Sod2	protein_coding	334	cds	GGC	GCG	35	-187	chr17	13008287	13008289	+	14345	10.4726	10.8324	14.0194	26.734	19.1715	16.0637	61.9692	35.3244	3	3	FALSE	0	FALSE	TRUE
ENSMUST00000007012	ENSMUSG00000006818	Sod2	protein_coding	892	cds	AAG	NA	221	-1	chr17	13015187	13015189	+	14348	44.4787	51.3823	53.6164	50.8865	20.7846	37	108.671	149.477	3	3	TRUE	0	FALSE	TRUE
ENSMUST00000029643	ENSMUSG00000028010	Gar1	protein_coding	630	cds	TAC	TTA	113	-118	chr3	129829400	129829398	-	22296	13.1474	10.1265	28.9914	27.6181	10.3301	12.9767	50.925	52.2653	3	3	FALSE	0	FALSE	FALSE
ENSMUST00000038945	ENSMUSG00000041801	Phlda3	protein_coding	163	5utr	NA	NA	-168	-545	chr1	135766281	135766283	+	1639	24.8748	36.9303	31.669	27.4607	24.103	27.4408	79.0044	93.4741	3	3	FALSE	0	FALSE	TRUE
ENSMUST00000102593	ENSMUSG00000028798	Eif3i	protein_coding	52	cds	ATG	AAA	0	-325	chr4	129600597	129600595	-	23902	26.4278	41.9507	31.3465	43.6774	20.5718	23.6881	87.9373	99.7251	3	3	TRUE	0	FALSE	TRUE
ENSMUST00000102593	ENSMUSG00000028798	Eif3i	protein_coding	1024	cds	GCC	NA	324	-1	chr4	129592059	129592057	-	23898	22.986	36.756	24.1088	46.9578	34.3354	36.5742	117.867	83.8508	3	3	TRUE	0	FALSE	TRUE
ENSMUST00000111336	ENSMUSG00000058076	Sdhc	protein_coding	25	cds	ATG	GCT	0	-169	chr1	171150579	171150577	-	2025	30.3302	38.4508	21.1681	38.5713	12.4541	31.6119	82.6372	89.9492	3	3	TRUE	0	FALSE	FALSE
ENSMUST00000081560	ENSMUSG00000058076	Sdhc	protein_coding	13	cds	ATG	GCT	0	-135	chr1	171150579	171150577	-	2025	31.1794	38.21	21.1681	38.7252	12.4541	31.4302	82.6095	90.5575	3	3	TRUE	0	FALSE	FALSE
ENSMUST00000173867	ENSMUSG00000007739	Cct4	protein_coding	235	cds	ATG	CCG	0	-539	chr11	22990753	22990755	+	4616	65.7471	87.7774	74.2519	58.7939	21.2559	32.2133	112.263	227.776	3	3	TRUE	0	FALSE	FALSE
ENSMUST00000173867	ENSMUSG00000007739	Cct4	protein_coding	238	cds	CCG	GAG	1	-538	chr11	22990756	22990758	+	4617	18.0289	18.3556	13.878	18.5695	14.8464	29.9333	63.3492	50.2625	3	3	TRUE	0	FALSE	FALSE
ENSMUST00000173853	ENSMUSG00000007739	Cct4	nonsense_mediated_decay	128	cds	ATG	CCG	0	-59	chr11	22990753	22990755	+	4616	70.8217	89.1571	82.9744	69.3439	24.9249	40.9011	135.17	242.953	3	3	TRUE	0	FALSE	FALSE
ENSMUST00000173853	ENSMUSG00000007739	Cct4	nonsense_mediated_decay	131	cds	CCG	GAG	1	-58	chr11	22990756	22990758	+	4617	18.0289	18.3556	13.878	18.5695	14.8464	29.9333	63.3492	50.2625	3	3	TRUE	0	FALSE	FALSE
ENSMUST00000174047	ENSMUSG00000007739	Cct4	nonsense_mediated_decay	104	cds	ATG	CCG	0	-120	chr11	22990753	22990755	+	4616	65.5302	88.2996	74.3701	61.5042	24.1044	34.8769	120.486	228.2	3	3	TRUE	0	FALSE	FALSE
ENSMUST00000174047	ENSMUSG00000007739	Cct4	nonsense_mediated_decay	107	cds	CCG	GAG	1	-119	chr11	22990756	22990758	+	4617	18.0289	18.3556	13.878	18.5695	14.8464	29.9333	63.3492	50.2625	3	3	TRUE	0	FALSE	FALSE
ENSMUST00000020562	ENSMUSG00000007739	Cct4	protein_coding	104	cds	ATG	CCG	0	-509	chr11	22990753	22990755	+	4616	65.5979	87.723	74.0903	58.6742	21.268	31.9499	111.892	227.411	3	3	TRUE	0	FALSE	FALSE
ENSMUST00000020562	ENSMUSG00000007739	Cct4	protein_coding	107	cds	CCG	GAG	1	-508	chr11	22990756	22990758	+	4617	18.0289	18.3556	13.878	18.5695	14.8464	29.9333	63.3492	50.2625	3	3	TRUE	0	FALSE	FALSE
ENSMUST00000174659	ENSMUSG00000007739	Cct4	nonsense_mediated_decay	102	cds	ATG	CCG	0	-47	chr11	22990753	22990755	+	4616	62.2328	78.1979	73.166	60.2919	24.0658	35.6441	120.002	213.597	3	3	TRUE	0	FALSE	FALSE
ENSMUST00000174659	ENSMUSG00000007739	Cct4	nonsense_mediated_decay	105	cds	CCG	GAG	1	-46	chr11	22990756	22990758	+	4617	18.0289	18.3556	13.878	18.5695	14.8464	29.9333	63.3492	50.2625	3	3	TRUE	0	FALSE	FALSE
ENSMUST00000009157	ENSMUSG00000009013	Dynll1	protein_coding	312	cds	GAC	AAG	46	-43	chr5	115298828	115298826	-	25677	31.3987	34.1324	43.4926	49.363	56.7112	80.3393	186.414	109.024	3	3	FALSE	0	FALSE	FALSE
ENSMUST00000112090	ENSMUSG00000009013	Dynll1	protein_coding	406	cds	GAC	AAG	46	-43	chr5	115298828	115298826	-	25677	31.3987	34.1324	43.4926	51.5911	58.2805	82.5946	192.466	109.024	3	3	FALSE	0	FALSE	FALSE
ENSMUST00000081180	ENSMUSG00000061518	Cox5b	protein_coding	138	cds	ATG	GCT	0	-85	chr1	36692492	36692494	+	187	45.9131	73.9377	41.4816	62.111	28.3473	24.8084	115.267	161.332	3	3	TRUE	0	FALSE	TRUE
ENSMUST00000081180	ENSMUSG00000061518	Cox5b	protein_coding	357	cds	CAA	AGG	73	-12	chr1	36693357	36693359	+	193	31.0617	23.003	43.613	25.6145	24.8048	38.4338	88.8531	97.6777	3	3	FALSE	0	FALSE	TRUE
ENSMUST00000193210	ENSMUSG00000061518	Cox5b	protein_coding	103	cds	ATG	GCT	0	-129	chr1	36691586	36691588	+	185	38.9367	63.2255	34.655	51.205	24.6356	20.2704	96.1111	136.817	3	3	TRUE	0	FALSE	TRUE
ENSMUST00000193210	ENSMUSG00000061518	Cox5b	protein_coding	301	cds	CCA	AAG	66	-63	chr1	36692471	36692473	+	186	31.772	19.1731	47.0693	25.9816	31.2735	39.0642	96.3193	98.0144	3	3	FALSE	0	FALSE	TRUE
ENSMUST00000193210	ENSMUSG00000061518	Cox5b	protein_coding	487	cds	CAC	NA	128	-1	chr1	36693303	36693305	+	191	73.296	85.3316	85.3174	91.3228	52.2417	77.1055	220.67	243.945	3	3	TRUE	0	FALSE	FALSE
ENSMUST00000195151	ENSMUSG00000061518	Cox5b	protein_coding	261	cds	CAC	TGA	87	-10	chr1	36693303	36693305	+	191	84.834	100.079	94.1072	109.04	57.853	77.1055	243.998	279.02	3	3	TRUE	0	FALSE	FALSE
ENSMUST00000022781	ENSMUSG00000022174	Dad1	protein_coding	598	cds	GGC	NA	112	-1	chr14	54242744	54242742	-	10930	73.158	85.4942	102.318	84.509	39.1965	71.5914	195.297	260.97	3	3	TRUE	0	FALSE	FALSE
ENSMUST00000128231	ENSMUSG00000022174	Dad1	protein_coding	408	cds	GGC	NA	112	-1	chr14	54242744	54242742	-	10930	73.158	85.4942	102.318	84.509	39.1965	71.5914	195.297	260.97	3	3	TRUE	0	FALSE	FALSE
ENSMUST00000023085	ENSMUSG00000022450	Ndufa6	protein_coding	484	cds	CCA	NA	130	-1	chr15	82350215	82350213	-	12436	29.7767	49.9543	20.0594	44.5937	22.0621	41.3241	107.98	99.7905	3	3	TRUE	0	FALSE	TRUE
ENSMUST00000028278	ENSMUSG00000026914	Psmd14	protein_coding	312	cds	ATG	GAC	0	-310	chr2	61722713	61722715	+	19033	24.2459	16.5815	10.5594	21.6508	19.9994	16.8965	58.5467	51.3868	3	3	TRUE	0	FALSE	TRUE
ENSMUST00000028278	ENSMUSG00000026914	Psmd14	protein_coding	462	cds	ATG	GAA	50	-260	chr2	61761004	61761006	+	19035	20.198	22.4412	34.3446	35.4962	24.8131	45.1092	105.419	76.9838	3	3	FALSE	0	FALSE	TRUE
ENSMUST00000087031	ENSMUSG00000067150	Xpo5	protein_coding	2353	cds	TCC	GAC	738	-466	chr17	46230325	46230327	+	15348	18.8926	16.7432	10.142	18.6191	19.9909	15.5362	54.1462	45.7779	3	3	FALSE	0	FALSE	TRUE
ENSMUST00000037941	ENSMUSG00000037706	Cd81	protein_coding	82	5utr	NA	NA	-181	-891	chr7	143052820	143052822	+	31153	30.4562	25.4869	45.6677	20.832	14.1122	27.0439	61.9882	101.611	3	3	FALSE	0	FALSE	TRUE
ENSMUST00000037941	ENSMUSG00000037706	Cd81	protein_coding	262	cds	ATG	GGG	0	-236	chr7	143053000	143053002	+	31156	27.8388	46.882	10.2469	39.7439	25.5944	18.9716	84.31	84.9677	3	3	TRUE	0	FALSE	TRUE
ENSMUST00000037941	ENSMUSG00000037706	Cd81	protein_coding	442	cds	GGC	ATC	60	-176	chr7	143062606	143065209	+	31160	27.3381	21.2353	37.9806	19.2847	13.2921	14.832	47.4088	86.554	3	3	FALSE	0	FALSE	TRUE
ENSMUST00000037941	ENSMUSG00000037706	Cd81	protein_coding	772	cds	AGG	AAC	170	-66	chr7	143066711	143066713	+	31170	23.8226	35.0625	28.922	19.7086	25.7975	23.1434	68.6495	87.8071	3	3	FALSE	0	FALSE	FALSE
ENSMUST00000037941	ENSMUSG00000037706	Cd81	protein_coding	967	cds	TAC	NA	235	-1	chr7	143067368	143067370	+	31177	62.5204	64.9197	86.3639	49.99	21.3922	27.4674	98.8497	213.804	3	3	TRUE	0	FALSE	TRUE
ENSMUST00000141954	ENSMUSG00000037706	Cd81	protein_coding	519	cds	AGG	AAC	99	-21	chr7	143066711	143066713	+	31170	23.8226	35.0625	28.922	19.7086	25.7975	23.1434	68.6495	87.8071	3	3	FALSE	0	FALSE	FALSE
ENSMUST00000043848	ENSMUSG00000038252	Ncapd2	protein_coding	781	cds	CAC	TCA	186	-1206	chr6	125185723	125185721	-	28417	76.9433	73.3235	110.563	123.799	76	120.321	320.119	260.829	3	3	FALSE	0	FALSE	FALSE
ENSMUST00000188762	ENSMUSG00000038252	Ncapd2	nonsense_mediated_decay	663	3utr	NA	NA	537	253	chr6	125185723	125185721	-	28417	23.4374	50.7629	14.8747	41.8221	33.0964	34.918	109.837	89.0751	3	3	FALSE	0	FALSE	FALSE
ENSMUST00000170693	ENSMUSG00000091896	Ube2d2a	protein_coding	431	cds	ATG	GCT	0	-147	chr18	35771989	35771991	+	16096	63.283	58.1988	64.5505	55.7498	20.9501	23.5491	100.249	186.032	3	3	TRUE	0	FALSE	TRUE
ENSMUST00000167406	ENSMUSG00000091896	Ube2d2a	protein_coding	387	cds	ATG	GCT	0	-147	chr18	35771988	35771990	+	16095	63.283	58.1988	64.5505	55.7498	20.9501	23.5491	100.249	186.032	3	3	TRUE	0	FALSE	TRUE
ENSMUST00000040430	ENSMUSG00000034993	Vat1	protein_coding	700	cds	GGC	CAT	201	-205	chr11	101462940	101462938	-	6896	13.1647	11.8008	16.4175	18.9297	13.9862	24.6395	57.5554	41.383	3	3	FALSE	0	FALSE	TRUE
ENSMUST00000004784	ENSMUSG00000004665	Cnn2	protein_coding	208	cds	GAG	GGA	38	-267	chr10	79991410	79991412	+	3134	75.7195	92.5135	82.9844	113.842	42.3899	47.0144	203.247	251.217	3	3	FALSE	0	FALSE	FALSE
ENSMUST00000004784	ENSMUSG00000004665	Cnn2	protein_coding	379	cds	GTC	AGC	95	-210	chr10	79992475	79992477	+	3141	17.1844	11.5863	27.7313	13.4699	17.0532	30.6398	61.1629	56.502	3	3	FALSE	0	FALSE	FALSE
ENSMUST00000004784	ENSMUSG00000004665	Cnn2	protein_coding	691	cds	CCC	ATG	199	-106	chr10	79993517	79993519	+	3147	35.9791	24.0223	25.1688	20.1286	23.454	26.6941	70.2768	85.1702	3	3	FALSE	0	FALSE	FALSE
ENSMUST00000004784	ENSMUSG00000004665	Cnn2	protein_coding	802	cds	ACC	GAC	236	-69	chr10	79994404	79994406	+	3151	36.8874	27.3471	49.0623	30.3186	28.9938	53.3436	112.656	113.297	3	3	FALSE	0	FALSE	FALSE
ENSMUST00000105374	ENSMUSG00000004665	Cnn2	protein_coding	169	cds	GAG	GGA	38	-228	chr10	79991410	79991412	+	3134	74.3145	90.8989	81.8039	112.233	41.8449	46.4314	200.509	247.017	3	3	FALSE	0	FALSE	FALSE
ENSMUST00000105374	ENSMUSG00000004665	Cnn2	protein_coding	340	cds	GTC	AGC	95	-171	chr10	79992475	79992477	+	3141	16.7145	11.2028	27.2389	13.1441	16.7848	30.2236	60.1525	55.1563	3	3	FALSE	0	FALSE	FALSE
ENSMUST00000105374	ENSMUSG00000004665	Cnn2	protein_coding	535	cds	CCC	ATG	160	-106	chr10	79993517	79993519	+	3147	35.9791	24.0223	25.1688	20.1286	23.1158	26.3181	69.5625	85.1702	3	3	FALSE	0	FALSE	FALSE
ENSMUST00000105374	ENSMUSG00000004665	Cnn2	protein_coding	646	cds	ACC	GAC	197	-69	chr10	79994404	79994406	+	3151	36.8874	27.3471	49.0623	30.3186	28.9938	53.0707	112.383	113.297	3	3	FALSE	0	FALSE	FALSE
ENSMUST00000021668	ENSMUSG00000021242	Npc2	protein_coding	285	cds	ATG	CGT	0	-149	chr12	84772828	84772826	-	8269	47.4714	38.7707	39.9657	19.605	10.2346	30.6382	60.4778	126.208	3	3	TRUE	0	FALSE	TRUE
ENSMUST00000021668	ENSMUSG00000021242	Npc2	protein_coding	555	cds	GAC	GGT	90	-59	chr12	84760773	84760771	-	8267	27.734	39.7272	17.3742	41.6942	13.2641	23.0116	77.9699	84.8354	3	3	FALSE	0	FALSE	TRUE
ENSMUST00000108817	ENSMUSG00000078851	H2aw	protein_coding	440	cds	AAG	NA	129	-1	chr11	58955124	58955126	+	5295	52.4909	59.0516	50.7304	59.1086	42.0381	54.9068	156.054	162.273	3	3	TRUE	0	FALSE	TRUE
ENSMUST00000100484	ENSMUSG00000016554	Eif3d	protein_coding	1035	cds	CCT	CAA	298	-250	chr15	77962547	77962545	-	12156	13.8804	11.2083	14.1421	19.0537	14.9674	20.4831	54.5042	39.2309	3	3	FALSE	0	FALSE	TRUE
ENSMUST00000100484	ENSMUSG00000016554	Eif3d	protein_coding	1677	cds	AAC	AAG	512	-36	chr15	77959620	77959618	-	12150	15.4506	13.7867	22.6134	25.2093	13.3773	15.4981	54.0848	51.8506	3	3	FALSE	0	FALSE	TRUE
ENSMUST00000165594	ENSMUSG00000001833	Septin7	protein_coding	245	cds	ATG	GTA	19	-418	chr9	25252683	25252685	+	33371	46.9234	32.0384	44.9889	37.204	18.4617	35.3685	91.0341	123.951	3	3	FALSE	0	FALSE	TRUE
ENSMUST00000165594	ENSMUSG00000001833	Septin7	protein_coding	1496	cds	TTT	NA	436	-1	chr9	25307534	25307536	+	33391	34.9562	50.5575	24.9735	45.7668	19.3611	34.4619	99.5898	110.487	3	3	TRUE	0	FALSE	TRUE
ENSMUST00000115272	ENSMUSG00000001833	Septin7	protein_coding	1508	cds	TTT	NA	436	-1	chr9	25307546	25307548	+	33392	35.879	51.5334	25.6753	46.7176	19.7605	35.2313	101.709	113.088	3	3	TRUE	0	FALSE	TRUE
ENSMUST00000105616	ENSMUSG00000029064	Gnb1	protein_coding	449	cds	ACA	GAC	64	-276	chr4	155535453	155535455	+	24548	20.4989	14.5585	16.7113	15.1467	12.941	22.8042	50.8918	51.7686	3	3	FALSE	0	FALSE	FALSE
ENSMUST00000105616	ENSMUSG00000029064	Gnb1	protein_coding	1274	cds	AAC	NA	339	-1	chr4	155557271	155557273	+	24561	23.7067	27.5142	38.0138	34.029	20.8398	31.7492	86.618	89.2347	3	3	TRUE	0	FALSE	FALSE
ENSMUST00000030940	ENSMUSG00000029064	Gnb1	protein_coding	492	cds	ACA	GAC	64	-276	chr4	155535453	155535455	+	24548	17.3245	13.3329	14.3082	14.0515	12.0949	22.4633	48.6096	44.9656	3	3	FALSE	0	FALSE	FALSE
ENSMUST00000030940	ENSMUSG00000029064	Gnb1	protein_coding	1317	cds	AAC	NA	339	-1	chr4	155557271	155557273	+	24561	23.7067	27.5142	38.0138	34.029	20.8398	31.7492	86.618	89.2347	3	3	TRUE	0	FALSE	FALSE
ENSMUST00000176411	ENSMUSG00000029064	Gnb1	protein_coding	368	cds	ACA	GAC	64	-43	chr4	155535453	155535455	+	24548	21.1723	12.4669	16.0556	15.6855	11.391	25.1086	52.1851	49.6948	3	3	FALSE	0	FALSE	FALSE
ENSMUST00000177094	ENSMUSG00000029064	Gnb1	protein_coding	429	cds	ACA	GAC	64	-209	chr4	155535453	155535455	+	24548	22.9797	12.9586	16.4726	14.8826	12.5831	24.6014	52.0671	52.4109	3	3	FALSE	0	FALSE	FALSE
ENSMUST00000176637	ENSMUSG00000029064	Gnb1	protein_coding	192	cds	ACA	GAC	64	-276	chr4	155535453	155535455	+	24548	21.197	13.045	14.4224	15.809	12.3333	24.0899	52.2321	48.6644	3	3	FALSE	0	FALSE	FALSE
ENSMUST00000028398	ENSMUSG00000027011	Ube2e3	protein_coding	1005	cds	ACA	NA	206	-1	chr2	78920049	78920051	+	19192	35.05	47.708	62.1122	51.9079	42.7285	52.2683	146.905	144.87	3	3	TRUE	0	FALSE	FALSE
ENSMUST00000121433	ENSMUSG00000027011	Ube2e3	protein_coding	987	cds	ACA	NA	206	-1	chr2	78920049	78920051	+	19192	35.05	47.708	62.1122	51.9079	42.7285	52.2683	146.905	144.87	3	3	TRUE	0	FALSE	FALSE
ENSMUST00000000348	ENSMUSG00000000339	Rtca	protein_coding	777	cds	GGC	TCT	186	-180	chr3	116499603	116499601	-	22232	28.3232	22.9064	27.7609	28.1437	21.2289	21.9203	71.2929	78.9905	3	3	FALSE	0	FALSE	FALSE
ENSMUST00000153005	ENSMUSG00000000339	Rtca	protein_coding	526	cds	GGC	TCT	80	-61	chr3	116499603	116499601	-	22232	27.0642	25.1259	27.7609	28.1437	21.2289	21.9203	71.2929	79.951	3	3	FALSE	0	FALSE	FALSE
ENSMUST00000113600	ENSMUSG00000079477	Rab7	protein_coding	206	cds	ATG	ACC	0	-207	chr6	88013691	88013689	-	27861	44.319	52.2703	52.2646	47.7827	11.2189	31.7985	90.8001	148.854	3	3	TRUE	0	FALSE	TRUE
ENSMUST00000113600	ENSMUSG00000079477	Rab7	protein_coding	446	cds	GCA	GAT	80	-127	chr6	88005152	88005150	-	27859	11.6008	11.6632	19.6743	10.2415	12.1704	14.8886	37.3005	42.9383	3	3	FALSE	0	FALSE	FALSE
ENSMUST00000113600	ENSMUSG00000079477	Rab7	protein_coding	653	cds	CCT	TAC	149	-58	chr6	88004252	88004250	-	27856	44.3555	40.3745	67.3704	51.5814	19.4639	59.8581	130.903	152.1	3	3	FALSE	0	FALSE	FALSE
ENSMUST00000113598	ENSMUSG00000079477	Rab7	protein_coding	329	cds	GCA	GAT	80	-127	chr6	88005152	88005150	-	27859	11.9805	11.3951	18.715	12.0035	11.5917	17.0172	40.6123	42.0906	3	3	FALSE	0	FALSE	FALSE
ENSMUST00000113598	ENSMUSG00000079477	Rab7	protein_coding	536	cds	CCT	TAC	149	-58	chr6	88004252	88004250	-	27856	44.3555	40.3745	67.3704	51.5814	19.4639	59.8581	130.903	152.1	3	3	FALSE	0	FALSE	FALSE
ENSMUST00000113597	ENSMUSG00000079477	Rab7	protein_coding	483	cds	GCA	GAT	80	-127	chr6	88005152	88005150	-	27859	11.8718	10.718	19.7705	10.375	12.8417	16.5784	39.7951	42.3603	3	3	FALSE	0	FALSE	FALSE
ENSMUST00000113597	ENSMUSG00000079477	Rab7	protein_coding	690	cds	CCT	TAC	149	-58	chr6	88004252	88004250	-	27856	44.3555	40.3745	67.3704	51.5814	19.4639	59.8581	130.903	152.1	3	3	FALSE	0	FALSE	FALSE
ENSMUST00000113596	ENSMUSG00000079477	Rab7	protein_coding	850	cds	CCT	TAC	149	-58	chr6	88004252	88004250	-	27856	44.3555	40.3745	67.3704	51.5814	19.4639	59.8581	130.903	152.1	3	3	FALSE	0	FALSE	FALSE
ENSMUST00000095048	ENSMUSG00000079477	Rab7	protein_coding	396	cds	GCA	GAT	80	-127	chr6	88005152	88005150	-	27859	12.474	13.691	20.6242	11.1871	12.2692	16.0485	39.5048	46.7891	3	3	FALSE	0	FALSE	FALSE
ENSMUST00000095048	ENSMUSG00000079477	Rab7	protein_coding	603	cds	CCT	TAC	149	-58	chr6	88004252	88004250	-	27856	44.3555	40.3745	67.3704	51.5814	19.4639	59.8581	130.903	152.1	3	3	FALSE	0	FALSE	FALSE
ENSMUST00000118593	ENSMUSG00000014599	Csf1	protein_coding	173	cds	ATG	ACC	0	-257	chr3	107760064	107760062	-	22112	88.5941	119.474	82.7731	69.7019	47.5662	75.7458	193.014	290.841	3	3	TRUE	0	FALSE	FALSE
ENSMUST00000118593	ENSMUSG00000014599	Csf1	protein_coding	554	cds	GAG	GAG	127	-130	chr3	107753747	107753745	-	22104	28.7879	29.8241	31.0217	39.9468	22.8929	42.8146	105.654	89.6337	3	3	FALSE	0	FALSE	FALSE
ENSMUST00000014743	ENSMUSG00000014599	Csf1	protein_coding	406	cds	ATG	ACC	0	-552	chr3	107760064	107760062	-	22112	95.6224	128.122	90.1947	75.3851	52.45	84.5218	212.357	313.939	3	3	TRUE	0	FALSE	FALSE
ENSMUST00000014743	ENSMUSG00000014599	Csf1	protein_coding	787	cds	GAG	GAG	127	-425	chr3	107753747	107753745	-	22104	28.7879	32.3647	31.0217	39.9468	25.1984	42.8146	107.96	92.1743	3	3	FALSE	0	FALSE	FALSE
ENSMUST00000014743	ENSMUSG00000014599	Csf1	protein_coding	2059	cds	GTA	NA	551	-1	chr3	107746745	107746743	-	22088	11.0957	24.3388	22.7895	19.838	14.1617	21.5042	55.504	58.224	3	3	TRUE	0	FALSE	FALSE
ENSMUST00000120654	ENSMUSG00000014599	Csf1	protein_coding	670	cds	GTA	NA	162	-1	chr3	107746745	107746743	-	22088	13.4358	28.575	25.9945	22.9924	15.5345	23.6091	62.1359	68.0053	3	3	TRUE	0	FALSE	FALSE
ENSMUST00000120243	ENSMUSG00000014599	Csf1	protein_coding	179	cds	ATG	ACC	0	-552	chr3	107760064	107760062	-	22112	95.6224	128.028	90.2122	75.3667	52.3885	84.6609	212.416	313.863	3	3	TRUE	0	FALSE	FALSE
ENSMUST00000120243	ENSMUSG00000014599	Csf1	protein_coding	560	cds	GAG	GAG	127	-425	chr3	107753747	107753745	-	22104	28.7879	32.2815	31.0217	39.9468	25.1984	42.8146	107.96	92.0911	3	3	FALSE	0	FALSE	FALSE
ENSMUST00000120243	ENSMUSG00000014599	Csf1	protein_coding	1832	cds	GTA	NA	551	-1	chr3	107746745	107746743	-	22088	10.7731	22.9342	21.2122	20.1197	12.6708	20.8205	53.6111	54.9194	3	3	TRUE	0	FALSE	FALSE
ENSMUST00000153114	ENSMUSG00000014599	Csf1	protein_coding	159	5utr	NA	NA	-68	-614	chr3	107760063	107760061	-	22111	93.0699	136.642	90.9265	76.419	51.3504	82.5057	210.275	320.638	3	3	FALSE	0	FALSE	TRUE
ENSMUST00000153114	ENSMUSG00000014599	Csf1	protein_coding	679	cds	GAG	GAG	151	-30	chr3	107753747	107753745	-	22104	28.7879	32.45	31.0217	39.9468	25.1984	42.8146	107.96	92.2596	3	3	FALSE	0	FALSE	FALSE
ENSMUST00000000804	ENSMUSG00000000787	Ddx3x	protein_coding	143	cds	ATG	AGT	0	-662	chrX	13281112	13281114	+	35777	21.763	36.9425	18.3425	29.4578	11.9975	14.9138	56.369	77.048	3	3	TRUE	0	FALSE	TRUE
ENSMUST00000000804	ENSMUSG00000000787	Ddx3x	protein_coding	359	cds	GGA	TCA	72	-590	chrX	13286098	13286100	+	35781	19.5982	14.2953	13.8408	17.0667	18.2078	14.9138	50.1882	47.7343	3	3	FALSE	0	FALSE	TRUE
ENSMUST00000000804	ENSMUSG00000000787	Ddx3x	protein_coding	656	cds	GGC	AAC	171	-491	chrX	13287533	13287535	+	35783	17.9002	11.5223	18.4029	23.1237	16.6065	19.2973	59.0275	47.8254	3	3	FALSE	0	FALSE	TRUE
ENSMUST00000026428	ENSMUSG00000039824	Myl6b	protein_coding	404	cds	AAC	GCC	100	-107	chr10	128496296	128496294	-	4215	23.5105	16.6737	48	16.8967	10.3923	18.8171	46.1061	88.1842	3	3	FALSE	0	FALSE	TRUE
ENSMUST00000125981	ENSMUSG00000028849	Map7d1	protein_coding	1767	cds	TCT	NA	589	-1	chr4	126232763	126232761	-	23785	24.7333	30.1471	21.3172	20.4884	17.2604	15.4746	53.2234	76.1976	3	3	TRUE	0	FALSE	TRUE
ENSMUST00000122129	ENSMUSG00000028849	Map7d1	protein_coding	215	cds	ATG	GAG	0	-814	chr4	126256063	126256061	-	23801	21.9269	32.9894	25.3887	25.3333	44.4738	31.6667	101.474	80.305	3	3	TRUE	0	FALSE	FALSE
ENSMUST00000122129	ENSMUSG00000028849	Map7d1	protein_coding	2654	cds	CTT	NA	813	-1	chr4	126232762	126232760	-	23784	44.5333	39.2314	50.8333	33.8584	36.5366	26.6163	97.0113	134.598	3	3	TRUE	0	FALSE	FALSE
ENSMUST00000061143	ENSMUSG00000028849	Map7d1	protein_coding	221	cds	ATG	GAG	0	-846	chr4	126256063	126256061	-	23801	22.1705	32.9894	25.3887	25.3333	44.4738	31.6667	101.474	80.5485	3	3	TRUE	0	FALSE	FALSE
ENSMUST00000061143	ENSMUSG00000028849	Map7d1	protein_coding	2756	cds	CTT	NA	845	-1	chr4	126232762	126232760	-	23784	44.5333	39.2314	50.8333	33.8584	36.5366	26.6163	97.0113	134.598	3	3	TRUE	0	FALSE	FALSE
ENSMUST00000106132	ENSMUSG00000028849	Map7d1	protein_coding	281	cds	ATG	GAG	0	-774	chr4	126256063	126256061	-	23801	21.4759	32.9894	25.3121	25.3333	44.4738	31.6667	101.474	79.7775	3	3	TRUE	0	FALSE	FALSE
ENSMUST00000106132	ENSMUSG00000028849	Map7d1	protein_coding	2600	cds	CTT	NA	773	-1	chr4	126232762	126232760	-	23784	44.5333	39.2314	50.8333	33.8584	36.5366	26.6163	97.0113	134.598	3	3	TRUE	0	FALSE	FALSE
ENSMUST00000034607	ENSMUSG00000032096	Arcn1	protein_coding	1160	cds	CAT	CCA	329	-182	chr9	44751361	44751359	-	33668	11.8914	17.2328	19.9811	13.4761	10.5368	12.4922	36.5051	49.1053	3	3	FALSE	0	FALSE	TRUE
ENSMUST00000016631	ENSMUSG00000016487	Ppfibp1	protein_coding	2011	cds	GAT	GAC	565	-404	chr6	147019493	147019495	+	28664	11.7883	16.2533	28.2715	20.0109	13.4263	10.7952	44.2324	56.3131	3	3	FALSE	0	FALSE	FALSE
ENSMUST00000111623	ENSMUSG00000016487	Ppfibp1	protein_coding	1942	cds	GAT	GAC	576	-404	chr6	147019493	147019495	+	28664	11.7883	16.2533	28.2715	20.0109	13.4263	10.7952	44.2324	56.3131	3	3	FALSE	0	FALSE	FALSE
ENSMUST00000136837	ENSMUSG00000016487	Ppfibp1	protein_coding	492	cds	GAT	GAC	164	-28	chr6	147019493	147019495	+	28664	11.7883	16.2533	28.2715	20.0109	13.4263	10.7952	44.2324	56.3131	3	3	FALSE	0	FALSE	FALSE
ENSMUST00000025421	ENSMUSG00000079614	Seh1l	protein_coding	1211	cds	AGC	NA	359	-1	chr18	67793156	67793158	+	16587	24.6713	30.214	18.9986	37.4523	30	19.5	86.9523	73.8839	3	3	TRUE	0	FALSE	TRUE
ENSMUST00000085673	ENSMUSG00000036986	Pml	protein_coding	2748	cds	GCC	NA	884	-1	chr9	58219809	58219807	-	33951	24.2468	35.1645	34.9666	48.3937	31.7896	29.4199	109.603	94.3778	3	3	TRUE	0	FALSE	FALSE
ENSMUST00000114136	ENSMUSG00000036986	Pml	protein_coding	2610	cds	GCC	NA	838	-1	chr9	58219809	58219807	-	33951	24.8556	35.7127	35.7817	49.4186	32.8939	30.231	112.544	96.3499	3	3	TRUE	0	FALSE	FALSE
ENSMUST00000135310	ENSMUSG00000036986	Pml	protein_coding	2691	3utr	NA	NA	2647	749	chr9	58219808	58219806	-	33950	18.7695	30.8098	30.1231	40.9032	21.2289	23.6361	85.7682	79.7025	3	3	FALSE	0	FALSE	FALSE
ENSMUST00000126690	ENSMUSG00000036986	Pml	protein_coding	2485	3utr	NA	NA	2484	749	chr9	58219808	58219806	-	33950	20	31.8932	31.6764	42.8263	22.1842	25.2126	90.2232	83.5696	3	3	FALSE	0	FALSE	FALSE
ENSMUST00000124063	ENSMUSG00000036986	Pml	protein_coding	369	cds	GCC	NA	123	-1	chr9	58219809	58219807	-	33951	25.4559	37.2477	33.7135	49.1919	35.3344	32.2635	116.79	96.4171	3	3	TRUE	0	FALSE	FALSE
ENSMUST00000153820	ENSMUSG00000036986	Pml	protein_coding	96	cds	ATG	GAA	0	-641	chr9	58249691	58249689	-	33960	13.7751	11.04	12.2275	16.9706	10.4336	11.8357	39.2398	37.0425	3	3	TRUE	0	FALSE	FALSE
ENSMUST00000124982	ENSMUSG00000036986	Pml	protein_coding	96	cds	ATG	GAA	0	-118	chr9	58249691	58249689	-	33960	14.5163	12.423	16.8129	22.7398	14.0788	11.0554	47.874	43.7523	3	3	TRUE	0	FALSE	FALSE
ENSMUST00000022529	ENSMUSG00000021957	Tkt	protein_coding	143	cds	ATG	GAA	0	-623	chr14	30549273	30549275	+	10649	25.9513	36.5	18.6221	26.5679	15.2752	24.3877	66.2309	81.0734	3	3	TRUE	0	FALSE	FALSE
ENSMUST00000022529	ENSMUSG00000021957	Tkt	protein_coding	473	cds	CCT	GTC	110	-513	chr14	30559856	30559858	+	10650	16.6089	17.6942	15.6038	19.1303	13	24.4479	56.5783	49.9069	3	3	FALSE	0	FALSE	TRUE
ENSMUST00000162356	ENSMUSG00000021957	Tkt	nonsense_mediated_decay	63	cds	ATG	GAA	0	-42	chr14	30549273	30549275	+	10649	25.9513	36.5	18.6221	26.5679	15.2752	24.3877	66.2309	81.0734	3	3	TRUE	0	FALSE	FALSE
ENSMUST00000160821	ENSMUSG00000042605	Atxn2	protein_coding	465	cds	AAG	TGA	155	-174	chr5	121783965	121783967	+	25795	12.6892	17.1337	11.2759	20.3471	21	13.2673	54.6144	41.0988	3	3	FALSE	0	FALSE	TRUE
ENSMUST00000029414	ENSMUSG00000027828	Ssr3	protein_coding	86	cds	ATG	GCT	0	-185	chr3	65392538	65392536	-	21183	71.867	107.297	62.7412	72.1437	54.0002	55.3975	181.541	241.905	3	3	TRUE	0	FALSE	FALSE
ENSMUST00000119896	ENSMUSG00000027828	Ssr3	protein_coding	16	cds	ATG	GCT	0	-179	chr3	65392538	65392536	-	21183	83.3883	122.561	72.2338	82.2558	61.1673	64.1188	207.542	278.184	3	3	TRUE	0	FALSE	FALSE
ENSMUST00000113127	ENSMUSG00000029405	G3bp2	protein_coding	1559	cds	CGT	NA	448	-1	chr5	92054803	92054801	-	25394	40.949	55.7529	47.9684	42.3167	22.0925	38.6489	103.058	144.67	3	3	TRUE	0	FALSE	TRUE
ENSMUST00000164378	ENSMUSG00000029405	G3bp2	protein_coding	1956	cds	CGT	NA	481	-1	chr5	92054466	92054464	-	25392	42.1572	57.6541	49.5921	43.4023	22.7598	39.9915	106.154	149.403	3	3	TRUE	0	FALSE	TRUE
ENSMUST00000169094	ENSMUSG00000029405	G3bp2	protein_coding	1646	cds	CGT	NA	481	-1	chr5	92054831	92054829	-	25395	42.5733	57.6397	49.8391	43.5709	22.8853	39.9079	106.364	150.052	3	3	TRUE	0	FALSE	TRUE
ENSMUST00000167918	ENSMUSG00000029405	G3bp2	protein_coding	1591	cds	CGT	NA	448	-1	chr5	92054787	92054785	-	25393	40.949	55.6403	47.8978	42.3167	22.1102	38.567	102.994	144.487	3	3	TRUE	0	FALSE	TRUE
ENSMUST00000034848	ENSMUSG00000032301	Psma4	protein_coding	138	cds	ATG	TCT	0	-261	chr9	54952105	54952107	+	33874	27.0875	14.801	28.1389	27.1981	24.8431	27.9167	79.9579	70.0273	3	3	TRUE	0	FALSE	FALSE
ENSMUST00000172407	ENSMUSG00000032301	Psma4	protein_coding	198	cds	ATG	TCT	0	-209	chr9	54952105	54952107	+	33874	27.0875	14.801	28.1389	26.6617	22.8299	26.6024	76.0939	70.0273	3	3	TRUE	0	FALSE	FALSE
ENSMUST00000171900	ENSMUSG00000032301	Psma4	protein_coding	349	cds	ATG	TCT	0	-139	chr9	54952105	54952107	+	33874	27.0875	14.801	28.0272	26.9787	23.4542	26.3405	76.7734	69.9156	3	3	TRUE	0	FALSE	FALSE
ENSMUST00000047357	ENSMUSG00000041781	Cpsf2	protein_coding	180	cds	ATG	ACA	0	-782	chr12	101981932	101981934	+	8464	36.8008	35.0384	40.6944	33.3439	18.8683	19.5992	71.8113	112.534	3	3	TRUE	0	FALSE	TRUE
ENSMUST00000047357	ENSMUSG00000041781	Cpsf2	protein_coding	2523	cds	GTG	NA	781	-1	chr12	102003201	102003203	+	8469	26.4481	34.3404	25.5604	40.3051	38.8043	32.4277	111.537	86.349	3	3	TRUE	0	FALSE	TRUE
ENSMUST00000067744	ENSMUSG00000054604	Cggbp1	protein_coding	490	cds	ATG	GAA	0	-167	chr16	64855572	64855574	+	13975	38.1512	32.9931	45.0566	42.5573	21.1723	54.6176	118.347	116.201	3	3	TRUE	0	FALSE	TRUE
ENSMUST00000042405	ENSMUSG00000046865	Fbl	protein_coding	99	cds	ATG	AAG	0	-327	chr7	28174531	28174533	+	29171	82.4732	48.4655	64.5102	69.5951	27.9464	68.9727	166.514	195.449	3	3	TRUE	0	FALSE	TRUE
ENSMUST00000042405	ENSMUSG00000046865	Fbl	protein_coding	594	cds	GGA	GCC	165	-162	chr7	28175991	28175993	+	29174	16.169	22.5323	28.0015	45.4576	25.7214	24.6667	95.8457	66.7028	3	3	FALSE	0	FALSE	TRUE
ENSMUST00000161308	ENSMUSG00000060743	H3f3a	protein_coding	350	cds	CAG	AAG	55	-81	chr1	180810234	180810232	-	2251	42.499	27.3448	52.9197	26.3993	25.6396	35.0677	87.1066	122.764	3	3	FALSE	0	FALSE	FALSE
ENSMUST00000161308	ENSMUSG00000060743	H3f3a	protein_coding	401	cds	CGA	GAA	72	-64	chr1	180810183	180810181	-	2250	13.1409	15.3234	13.3022	13.4496	10.499	22.3905	46.3391	41.7665	3	3	FALSE	0	FALSE	FALSE
ENSMUST00000161308	ENSMUSG00000060743	H3f3a	protein_coding	572	cds	CGC	ATA	129	-7	chr1	180803101	180803099	-	2241	13.8361	16.3333	13.1829	16.9183	23.7567	23.9568	64.6317	43.3524	3	3	FALSE	0	FALSE	FALSE
ENSMUST00000081026	ENSMUSG00000060743	H3f3a	protein_coding	100	cds	ATG	GCT	0	-135	chr1	180811927	180811925	-	2255	17.5053	24.2873	10.8509	16.1798	14.2574	11.0058	41.443	52.6435	3	3	TRUE	0	FALSE	FALSE
ENSMUST00000081026	ENSMUSG00000060743	H3f3a	protein_coding	226	cds	AGG	CCT	42	-93	chr1	180811801	180811799	-	2252	11.0983	18.2112	10.2025	20.4398	15.725	11.5641	47.729	39.5119	3	3	FALSE	0	FALSE	FALSE
ENSMUST00000081026	ENSMUSG00000060743	H3f3a	protein_coding	265	cds	CAG	AAG	55	-80	chr1	180810234	180810232	-	2251	43.6393	28.3381	54.1305	27.3214	26.2431	36.3181	89.8827	126.108	3	3	FALSE	0	FALSE	FALSE
ENSMUST00000081026	ENSMUSG00000060743	H3f3a	protein_coding	316	cds	CGA	GAA	72	-63	chr1	180810183	180810181	-	2250	13.1409	15.3234	13.3022	13.4496	10.8329	22.3905	46.673	41.7665	3	3	FALSE	0	FALSE	FALSE
ENSMUST00000081026	ENSMUSG00000060743	H3f3a	protein_coding	484	cds	CGC	ATA	128	-7	chr1	180803101	180803099	-	2241	13.8361	16.3333	13.1829	16.9183	23.7567	23.9568	64.6317	43.3524	3	3	FALSE	0	FALSE	FALSE
ENSMUST00000162814	ENSMUSG00000060743	H3f3a	protein_coding	260	cds	ATG	GCT	0	-136	chr1	180811927	180811925	-	2255	17.0975	20.6754	10.7325	17.9515	13.0705	10.7672	41.7892	48.5054	3	3	TRUE	0	FALSE	FALSE
ENSMUST00000162814	ENSMUSG00000060743	H3f3a	protein_coding	386	cds	AGG	CCT	42	-94	chr1	180811801	180811799	-	2252	12.0011	16.4061	11.2097	18.2719	14.5076	14.0255	46.805	39.6169	3	3	FALSE	0	FALSE	FALSE
ENSMUST00000162814	ENSMUSG00000060743	H3f3a	protein_coding	425	cds	CAG	AAG	55	-81	chr1	180810234	180810232	-	2251	42.2505	27.2436	52.8834	26.443	25.5256	35.0236	86.9921	122.378	3	3	FALSE	0	FALSE	FALSE
ENSMUST00000162814	ENSMUSG00000060743	H3f3a	protein_coding	476	cds	CGA	GAA	72	-64	chr1	180810183	180810181	-	2250	13.1409	15.3234	13.3022	13.4496	10.4358	22.3905	46.2759	41.7665	3	3	FALSE	0	FALSE	FALSE
ENSMUST00000162814	ENSMUSG00000060743	H3f3a	protein_coding	647	cds	CGC	ATA	129	-7	chr1	180803101	180803099	-	2241	13.8361	16.3333	13.1829	16.9183	23.7567	23.9568	64.6317	43.3524	3	3	FALSE	0	FALSE	FALSE
ENSMUST00000159789	ENSMUSG00000060743	H3f3a	protein_coding	124	cds	ATG	GCT	0	-118	chr1	180811927	180811925	-	2255	19.0463	25.4247	13.8893	18.2624	14.0465	12.9837	45.2926	58.3604	3	3	TRUE	0	FALSE	FALSE
ENSMUST00000159789	ENSMUSG00000060743	H3f3a	protein_coding	250	cds	AGG	CCT	42	-76	chr1	180811801	180811799	-	2252	11.9719	20.5859	12.6557	21.8044	18.0834	16.678	56.5659	45.2135	3	3	FALSE	0	FALSE	FALSE
ENSMUST00000159789	ENSMUSG00000060743	H3f3a	protein_coding	289	cds	CAG	AAG	55	-63	chr1	180810234	180810232	-	2251	47.1319	30.8012	57.5156	29.3562	28.9668	41.1017	99.4247	135.449	3	3	FALSE	0	FALSE	FALSE
ENSMUST00000159789	ENSMUSG00000060743	H3f3a	protein_coding	340	cds	CGA	GAA	72	-46	chr1	180810183	180810181	-	2250	13.1409	15.3234	13.3022	13.4496	11.1835	22.3905	47.0236	41.7665	3	3	FALSE	0	FALSE	FALSE
ENSMUST00000162118	ENSMUSG00000060743	H3f3a	protein_coding	253	cds	ATG	GCT	0	-54	chr1	180811927	180811925	-	2255	21.8877	32.2614	16.2292	22.4394	20.7025	16.6202	59.7621	70.3782	3	3	TRUE	0	FALSE	FALSE
ENSMUST00000162118	ENSMUSG00000060743	H3f3a	protein_coding	379	cds	AGG	CCT	42	-12	chr1	180811801	180811799	-	2252	14.2926	25.6258	13.3279	23.378	22.2945	18.4885	64.1609	53.2463	3	3	FALSE	0	FALSE	FALSE
ENSMUST00000159685	ENSMUSG00000060743	H3f3a	protein_coding	213	cds	ATG	GCT	0	-52	chr1	180811927	180811925	-	2255	20.3399	31.9242	16.5507	22.3887	18.0719	17.5272	57.9878	68.8148	3	3	TRUE	0	FALSE	FALSE
ENSMUST00000159685	ENSMUSG00000060743	H3f3a	protein_coding	339	cds	AGG	CCT	42	-10	chr1	180811801	180811799	-	2252	16.6592	24.7307	17.4123	24.6837	24.4087	18.7062	67.7986	58.8021	3	3	FALSE	0	FALSE	FALSE
ENSMUST00000022925	ENSMUSG00000022312	Eif3h	protein_coding	528	cds	ATA	AAA	154	-198	chr15	51797666	51797664	-	11799	22.188	18.0739	21.9208	20.7081	23.5344	27.1981	71.4406	62.1827	3	3	FALSE	0	FALSE	TRUE
ENSMUST00000064910	ENSMUSG00000030224	Strap	protein_coding	1324	cds	GCC	NA	349	-1	chr6	137750606	137750608	+	28610	23.5239	36.5313	20.2324	32.8877	26.5333	35.6299	95.0509	80.2877	3	3	TRUE	0	FALSE	TRUE
ENSMUST00000042957	ENSMUSG00000022986	Krt75	protein_coding	1429	cds	AGG	AAG	452	-99	chr15	101567973	101567971	-	12896	80.829	107.601	68.536	99.8434	72.0714	94.2187	266.134	256.966	3	3	FALSE	0	FALSE	TRUE
ENSMUST00000029013	ENSMUSG00000027509	Rae1	protein_coding	265	cds	ATG	AGT	0	-368	chr2	173002663	173002665	+	20639	86.4458	67.4346	100.182	82.0016	70.5286	100.16	252.69	254.062	3	3	TRUE	0	FALSE	TRUE
ENSMUST00000129414	ENSMUSG00000084786	Ubl5	protein_coding	1758	cds	GGA	GAT	57	-16	chr9	20645652	20645654	+	33160	31.3331	40.2679	24.983	32.14	21.7917	33.1483	87.0801	96.584	3	3	FALSE	0	FALSE	FALSE
ENSMUST00000160682	ENSMUSG00000084786	Ubl5	protein_coding	320	cds	GGA	GAT	57	-16	chr9	20645652	20645654	+	33160	36.9505	41.6093	24.68	34.1733	20.8184	34.4167	89.4084	103.24	3	3	FALSE	0	FALSE	FALSE
ENSMUST00000162303	ENSMUSG00000084786	Ubl5	protein_coding	338	cds	GGA	GAT	57	-16	chr9	20645652	20645654	+	33160	29.4291	43.0817	24.7101	33.4022	21.7917	35.0386	90.2325	97.2209	3	3	FALSE	0	FALSE	FALSE
ENSMUST00000160874	ENSMUSG00000084786	Ubl5	nonsense_mediated_decay	246	3utr	NA	NA	175	32	chr9	20645653	20645655	+	33161	28.1775	15.7127	25.8845	20.2642	11.5655	18.269	50.0988	69.7747	3	3	FALSE	0	FALSE	FALSE
ENSMUST00000160124	ENSMUSG00000084786	Ubl5	protein_coding	334	cds	GGA	GAT	57	-16	chr9	20645652	20645654	+	33160	34.785	41.9035	23.9637	36.5405	21.6089	33.3272	91.4767	100.652	3	3	FALSE	0	FALSE	FALSE
ENSMUST00000015100	ENSMUSG00000014956	Ppp1cb	protein_coding	798	cds	GGA	AAG	95	-232	chr5	32483360	32483362	+	24811	11.3137	11.7953	23.3999	20.5181	13.2309	11.4723	45.2214	46.5089	3	3	FALSE	0	FALSE	TRUE
ENSMUST00000114840	ENSMUSG00000032011	Thy1	protein_coding	118	cds	ATG	AAC	0	-162	chr9	44045981	44045983	+	33581	110.432	119.834	137.51	135.363	83.1475	137.479	355.989	367.777	3	3	TRUE	0	FALSE	TRUE
ENSMUST00000114840	ENSMUSG00000032011	Thy1	protein_coding	322	cds	GGG	ATA	68	-94	chr9	44046780	44046782	+	33582	42.7748	24.8628	58.9528	34.6681	25.2516	55.8194	115.739	126.591	3	3	FALSE	0	FALSE	TRUE
ENSMUST00000114840	ENSMUSG00000032011	Thy1	protein_coding	532	cds	CAG	AAC	138	-24	chr9	44047376	44047378	+	33586	12.8211	12.1232	19.4865	10.6749	12.5379	24.2445	47.4573	44.4308	3	3	FALSE	0	FALSE	TRUE
ENSMUST00000001927	ENSMUSG00000001870	Ltbp1	protein_coding	1764	cds	CCC	GAG	482	-1230	chr17	75227010	75227012	+	15622	19.1569	29.3036	21.7346	32.7646	11.244	24.6809	68.6895	70.1951	3	3	FALSE	0	FALSE	FALSE
ENSMUST00000001927	ENSMUSG00000001870	Ltbp1	protein_coding	2703	cds	CCT	GAG	795	-917	chr17	75278965	75278967	+	15629	21.1346	14.35	23.9705	26.7421	18.3042	23.6784	68.7247	59.4551	3	3	FALSE	0	FALSE	FALSE
ENSMUST00000001927	ENSMUSG00000001870	Ltbp1	protein_coding	4482	cds	ACG	GAA	1388	-324	chr17	75360719	75360721	+	15641	15.2053	16.3169	20.4697	17.7643	10.0852	23.1224	50.9719	51.9919	3	3	FALSE	0	FALSE	FALSE
ENSMUST00000135447	ENSMUSG00000001870	Ltbp1	protein_coding	664	cds	CCC	GAG	164	-816	chr17	75227010	75227012	+	15622	19.1569	29.3036	20.0406	30.7461	11.244	22.498	64.4881	68.5011	3	3	FALSE	0	FALSE	FALSE
ENSMUST00000135447	ENSMUSG00000001870	Ltbp1	protein_coding	1603	cds	CCT	GAG	477	-503	chr17	75278965	75278967	+	15629	21.1346	14.35	23.9705	26.7421	18.3042	23.6784	68.7247	59.4551	3	3	FALSE	0	FALSE	FALSE
ENSMUST00000112516	ENSMUSG00000001870	Ltbp1	protein_coding	664	cds	CCC	GAG	164	-1230	chr17	75227010	75227012	+	15622	19.1569	29.3036	19.678	30.4333	11.244	22.2079	63.8852	68.1385	3	3	FALSE	0	FALSE	FALSE
ENSMUST00000112516	ENSMUSG00000001870	Ltbp1	protein_coding	1603	cds	CCT	GAG	477	-917	chr17	75278965	75278967	+	15629	21.1346	14.35	23.9705	26.7421	18.3042	23.6784	68.7247	59.4551	3	3	FALSE	0	FALSE	FALSE
ENSMUST00000112514	ENSMUSG00000001870	Ltbp1	protein_coding	563	cds	CCC	GAG	164	-1177	chr17	75227010	75227012	+	15622	19.1569	29.3036	19.6989	30.4521	11.244	22.1265	63.8226	68.1594	3	3	FALSE	0	FALSE	FALSE
ENSMUST00000112514	ENSMUSG00000001870	Ltbp1	protein_coding	1343	cds	CCT	GAG	424	-917	chr17	75278965	75278967	+	15629	21.1346	14.35	23.9705	26.7421	18.3042	23.6784	68.7247	59.4551	3	3	FALSE	0	FALSE	FALSE
ENSMUST00000112524	ENSMUSG00000032786	Alas1	protein_coding	578	cds	ATG	GAG	0	-642	chr9	106246958	106246956	-	34930	35.2253	34.5178	30.1667	44.3899	29.0694	40.5393	113.999	99.9097	3	3	TRUE	0	FALSE	FALSE
ENSMUST00000141118	ENSMUSG00000032786	Alas1	protein_coding	891	cds	ATG	GAG	0	-642	chr9	106241691	106241689	-	34927	39.5053	36.1535	34.8331	41.1766	31.4917	36.2404	108.909	110.492	3	3	TRUE	0	FALSE	TRUE
ENSMUST00000074082	ENSMUSG00000032786	Alas1	protein_coding	93	cds	ATG	GAG	0	-641	chr9	106246958	106246956	-	34930	38.6946	32.1342	34.0313	42.679	26.4895	39.7393	108.908	104.86	3	3	TRUE	0	FALSE	FALSE
ENSMUST00000039559	ENSMUSG00000040152	Thbs1	protein_coding	72	5utr	NA	NA	-157	-3672	chr2	118111947	118111949	+	19563	25.5064	19.0341	22.7505	19.1803	14.3639	20.4057	53.95	67.291	3	3	FALSE	0	FALSE	TRUE
ENSMUST00000039559	ENSMUSG00000040152	Thbs1	protein_coding	181	5utr	NA	NA	-48	-3563	chr2	118112056	118112058	+	19567	38.3359	29.3518	34.6051	28.4242	14.649	31.2876	74.3608	102.293	3	3	FALSE	0	FALSE	TRUE
ENSMUST00000039559	ENSMUSG00000040152	Thbs1	protein_coding	209	5utr	NA	NA	-20	-3535	chr2	118112623	118112625	+	19571	60.1295	71.0494	62.9059	66.3502	57.1236	76.1625	199.636	194.085	3	3	FALSE	0	FALSE	TRUE
ENSMUST00000039559	ENSMUSG00000040152	Thbs1	protein_coding	228	cds	ATG	GAG	0	-1171	chr2	118112642	118112644	+	19572	77.9756	151.954	51.8861	90.9719	17.072	45.3823	153.426	281.816	3	3	TRUE	0	FALSE	TRUE
ENSMUST00000039559	ENSMUSG00000040152	Thbs1	protein_coding	273	cds	TGT	GGA	15	-1156	chr2	118112687	118112689	+	19573	37.4312	46.6428	52.6855	28.8562	27.0493	22.6168	78.5223	136.76	3	3	FALSE	0	FALSE	TRUE
ENSMUST00000039559	ENSMUSG00000040152	Thbs1	protein_coding	276	cds	GGA	AGC	16	-1155	chr2	118112690	118112692	+	19574	40.5198	24.8821	53.4309	29.8555	33.0701	49.4175	112.343	118.833	3	3	FALSE	0	FALSE	TRUE
ENSMUST00000039559	ENSMUSG00000040152	Thbs1	protein_coding	441	cds	GAT	GAC	71	-1100	chr2	118113115	118113117	+	19577	122.467	188.457	71.0037	228.248	77.7908	138.448	444.488	381.929	3	3	FALSE	0	FALSE	TRUE
ENSMUST00000039559	ENSMUSG00000040152	Thbs1	protein_coding	708	cds	CAA	GAG	160	-1011	chr2	118113382	118113384	+	19588	38.5003	20.2438	50.9678	21.8585	11.5133	36.3659	69.7376	109.712	3	3	FALSE	0	FALSE	TRUE
ENSMUST00000039559	ENSMUSG00000040152	Thbs1	protein_coding	801	cds	GCC	AGC	191	-980	chr2	118113475	118113477	+	19592	21.4766	24.7266	18.2424	18.7483	24.0561	33.5677	76.3721	64.4457	3	3	FALSE	0	FALSE	TRUE
ENSMUST00000039559	ENSMUSG00000040152	Thbs1	protein_coding	1011	cds	CAC	AAA	261	-910	chr2	118114730	118114732	+	19601	36.9023	24.2174	47.7974	25.8673	36.9235	57.6227	120.414	108.917	3	3	FALSE	0	FALSE	TRUE
ENSMUST00000039559	ENSMUSG00000040152	Thbs1	protein_coding	1017	cds	ACA	AAG	263	-908	chr2	118114736	118114738	+	19602	25.7227	30.0475	30.7307	19.7397	11.0553	12.6635	43.4584	86.5009	3	3	FALSE	0	FALSE	TRUE
ENSMUST00000039559	ENSMUSG00000040152	Thbs1	protein_coding	1125	cds	CGA	AAA	299	-872	chr2	118114844	118114846	+	19610	60.2547	58.0258	86.9795	72.6993	67.2188	100.186	240.105	205.26	3	3	FALSE	0	FALSE	TRUE
ENSMUST00000039559	ENSMUSG00000040152	Thbs1	protein_coding	1176	cds	CCC	CTC	316	-855	chr2	118114989	118114991	+	19613	58.6126	82.9704	42.2856	58.6613	26.6217	27.0385	112.322	183.869	3	3	FALSE	0	FALSE	TRUE
ENSMUST00000039559	ENSMUSG00000040152	Thbs1	protein_coding	1239	cds	ACA	GAG	337	-834	chr2	118115052	118115054	+	19616	33.5828	27.6667	46.2278	27.5953	22.8048	34.4217	84.8218	107.477	3	3	FALSE	0	FALSE	TRUE
ENSMUST00000039559	ENSMUSG00000040152	Thbs1	protein_coding	1272	cds	TGC	AAA	348	-823	chr2	118115844	118115846	+	19618	20.1806	20.5773	28.2425	18.2877	10.398	29.8361	58.5219	69.0004	3	3	FALSE	0	FALSE	TRUE
ENSMUST00000039559	ENSMUSG00000040152	Thbs1	protein_coding	1386	cds	TCT	GAG	386	-785	chr2	118117518	118117520	+	19624	37.4896	27.8898	33.1155	24.9931	13.9763	26.9349	65.9044	98.495	3	3	FALSE	0	FALSE	TRUE
ENSMUST00000039559	ENSMUSG00000040152	Thbs1	protein_coding	1422	cds	GGA	ATT	398	-773	chr2	118117554	118117556	+	19626	46.1251	72.3667	27.4837	69.4603	26.9399	64.2294	160.63	145.975	3	3	FALSE	0	FALSE	TRUE
ENSMUST00000039559	ENSMUSG00000040152	Thbs1	protein_coding	1458	cds	AAC	AAC	410	-761	chr2	118117590	118117592	+	19629	16.6219	31.8198	22.706	22.3883	27.5108	29.2098	79.1088	71.1478	3	3	FALSE	0	FALSE	TRUE
ENSMUST00000039559	ENSMUSG00000040152	Thbs1	protein_coding	1560	cds	TGG	TCG	444	-727	chr2	118118196	118118198	+	19631	28.2203	29.3518	27.843	19.2667	16.787	20.9239	56.9776	85.4151	3	3	FALSE	0	FALSE	TRUE
ENSMUST00000039559	ENSMUSG00000040152	Thbs1	protein_coding	1725	cds	TCA	CCA	499	-672	chr2	118118671	118118673	+	19638	14.9365	20.9471	19.5115	20.2943	10.5493	11.1677	42.0112	55.3952	3	3	FALSE	0	FALSE	TRUE
ENSMUST00000039559	ENSMUSG00000040152	Thbs1	protein_coding	1908	cds	GCC	AAG	560	-611	chr2	118119110	118119112	+	19643	41.461	45.7889	50.2999	53.6506	62.9207	124.25	240.822	137.55	3	3	FALSE	0	FALSE	TRUE
ENSMUST00000039559	ENSMUSG00000040152	Thbs1	protein_coding	2028	cds	TTC	AAT	600	-571	chr2	118119345	118119347	+	19649	17.2974	13.1791	13.1075	13.0653	14.0243	22.9316	50.0212	43.584	3	3	FALSE	0	FALSE	TRUE
ENSMUST00000039559	ENSMUSG00000040152	Thbs1	protein_coding	2070	cds	GGC	TAC	614	-557	chr2	118119387	118119389	+	19652	73.4959	71.2555	90.9873	74.4125	41.0292	60.4647	175.906	235.739	3	3	FALSE	0	FALSE	TRUE
ENSMUST00000039559	ENSMUSG00000040152	Thbs1	protein_coding	2106	cds	GGC	TCA	626	-545	chr2	118119423	118119425	+	19654	26.5444	37.9238	25.8985	18.095	12.342	19.1138	49.5508	90.3666	3	3	FALSE	0	FALSE	TRUE
ENSMUST00000039559	ENSMUSG00000040152	Thbs1	protein_coding	2154	cds	CAG	GTG	642	-529	chr2	118119471	118119473	+	19658	21.6349	19.9876	33.1859	11.0869	16.1621	10.4109	37.6599	74.8084	3	3	FALSE	0	FALSE	TRUE
ENSMUST00000039559	ENSMUSG00000040152	Thbs1	protein_coding	2160	cds	TGC	AAA	644	-527	chr2	118119819	118119821	+	19659	31.8851	23.5873	26.3403	22.0775	11.3707	39.8895	73.3378	81.8127	3	3	FALSE	0	FALSE	TRUE
ENSMUST00000039559	ENSMUSG00000040152	Thbs1	protein_coding	2244	cds	CCC	ATG	672	-499	chr2	118119903	118119905	+	19665	32.742	31.8483	22.7722	26.1382	12.0984	23.6661	61.9027	87.3624	3	3	FALSE	0	FALSE	TRUE
ENSMUST00000039559	ENSMUSG00000040152	Thbs1	protein_coding	2286	cds	GGC	ATC	686	-485	chr2	118119945	118119947	+	19669	26.5511	30.7508	28.5307	36.0888	11.7933	28.3643	76.2465	85.8326	3	3	FALSE	0	FALSE	TRUE
ENSMUST00000039559	ENSMUSG00000040152	Thbs1	protein_coding	2319	cds	GGC	TGG	697	-474	chr2	118119978	118119980	+	19671	53.5275	74.0921	55.0585	63.0498	27.1918	70.3589	160.6	182.678	3	3	FALSE	0	FALSE	TRUE
ENSMUST00000039559	ENSMUSG00000040152	Thbs1	protein_coding	2472	cds	CCC	GAT	748	-423	chr2	118120317	118120319	+	19679	48.8626	59.8779	69.9185	66.6958	42.0152	69.1152	177.826	178.659	3	3	FALSE	0	FALSE	TRUE
ENSMUST00000039559	ENSMUSG00000040152	Thbs1	protein_coding	2901	cds	GGA	GAT	891	-280	chr2	118122583	118122585	+	19704	20.7365	16.8995	30.6814	23.5863	22.0607	22.4785	68.1254	68.3173	3	3	FALSE	0	FALSE	TRUE
ENSMUST00000039559	ENSMUSG00000040152	Thbs1	protein_coding	2940	cds	CCT	GAT	904	-267	chr2	118122622	118122624	+	19705	45.5586	32.9096	68.8685	40.1735	18.3148	38.5816	97.0699	147.337	3	3	FALSE	0	FALSE	TRUE
ENSMUST00000039559	ENSMUSG00000040152	Thbs1	protein_coding	2943	cds	GAT	GAC	905	-266	chr2	118122625	118122627	+	19706	26.6067	23.9333	31.6083	15.9025	29.1345	26.9531	71.9901	82.1482	3	3	FALSE	0	FALSE	TRUE
ENSMUST00000039559	ENSMUSG00000040152	Thbs1	protein_coding	2970	cds	CCC	AAT	914	-257	chr2	118122652	118122654	+	19707	20.1185	17.8245	13.3074	19.785	11.1959	36.3581	67.3391	51.2504	3	3	FALSE	0	FALSE	TRUE
ENSMUST00000039559	ENSMUSG00000040152	Thbs1	protein_coding	3048	cds	CCA	GAT	940	-231	chr2	118122923	118122925	+	19708	25.5362	38.3123	21.4835	20.7514	10.5918	17.2283	48.5715	85.332	3	3	FALSE	0	FALSE	TRUE
ENSMUST00000039559	ENSMUSG00000040152	Thbs1	protein_coding	3054	cds	ATT	GAT	942	-229	chr2	118122929	118122931	+	19709	24.044	23.8135	37.3475	34.5238	38.366	40.0444	112.934	85.205	3	3	FALSE	0	FALSE	TRUE
ENSMUST00000039559	ENSMUSG00000040152	Thbs1	protein_coding	3213	cds	GGA	CTT	995	-176	chr2	118123088	118123090	+	19719	181.927	175.863	283.134	202.245	69.3814	164.151	435.776	640.924	3	3	FALSE	0	FALSE	TRUE
ENSMUST00000039559	ENSMUSG00000040152	Thbs1	protein_coding	3447	cds	GGC	GAG	1073	-98	chr2	118123488	118123490	+	19730	101.695	108.271	145.102	96.9924	19.5071	51.7361	168.236	355.068	3	3	FALSE	0	FALSE	TRUE
ENSMUST00000039559	ENSMUSG00000040152	Thbs1	protein_coding	3555	cds	AGA	TGG	1109	-62	chr2	118123972	118123974	+	19738	29.1632	42.0968	41.9194	30.5441	38.2353	49.92	118.699	113.179	3	3	FALSE	0	FALSE	TRUE
ENSMUST00000039559	ENSMUSG00000040152	Thbs1	protein_coding	3663	cds	GGC	GGT	1145	-26	chr2	118124186	118124188	+	19745	31.168	31.0151	26.3904	17.2985	15.5042	32.6758	65.4785	88.5736	3	3	FALSE	0	FALSE	TRUE
ENSMUST00000039559	ENSMUSG00000040152	Thbs1	protein_coding	3738	cds	TCC	NA	1170	-1	chr2	118125023	118125025	+	19748	52.4811	69.8398	35.9408	49.0719	29.4723	24.4476	102.992	158.262	3	3	TRUE	0	FALSE	TRUE
ENSMUST00000023361	ENSMUSG00000022680	Pdxdc1	protein_coding	2556	cds	GTT	NA	788	-1	chr16	13834820	13834818	-	13129	26.7794	16.259	39.0544	31.9945	15.2528	28.6271	75.8744	82.0929	3	3	TRUE	0	FALSE	TRUE
ENSMUST00000041806	ENSMUSG00000019969	Psen1	protein_coding	262	cds	ATG	ACA	0	-467	chr12	83699615	83699617	+	8259	27.738	17.9629	19.8	12.0173	10.457	18.6284	41.1026	65.501	3	3	TRUE	0	FALSE	TRUE
ENSMUST00000101225	ENSMUSG00000019969	Psen1	protein_coding	491	cds	ATG	ACA	0	-467	chr12	83699564	83699566	+	8258	27.738	17.9629	19.8	12.0173	10.457	18.6284	41.1026	65.501	3	3	TRUE	0	FALSE	TRUE
ENSMUST00000030547	ENSMUSG00000028763	Hspg2	protein_coding	93	cds	ATG	GGG	0	-4375	chr4	137468861	137468863	+	24150	54.7508	47.7133	44.8586	40.2134	14.8117	23.7172	78.7423	147.323	3	3	TRUE	0	FALSE	FALSE
ENSMUST00000030547	ENSMUSG00000028763	Hspg2	protein_coding	1074	cds	AAC	GAG	327	-4048	chr4	137511268	137511270	+	24156	40.7314	46.8551	29.2884	42.5746	12.0422	30.125	84.7418	116.875	3	3	FALSE	0	FALSE	FALSE
ENSMUST00000030547	ENSMUSG00000028763	Hspg2	protein_coding	1413	cds	AGG	CTC	440	-3935	chr4	137512212	137512214	+	24159	11.8158	15.6434	17.5242	13.7891	11.4527	19.8726	45.1144	44.9834	3	3	FALSE	0	FALSE	FALSE
ENSMUST00000030547	ENSMUSG00000028763	Hspg2	protein_coding	1878	cds	TGG	GCC	595	-3780	chr4	137514741	137514743	+	24163	27.6398	26.8518	40.3606	37.8521	17.5812	21.5813	77.0146	94.8522	3	3	FALSE	0	FALSE	FALSE
ENSMUST00000030547	ENSMUSG00000028763	Hspg2	protein_coding	3270	cds	CAA	GAG	1059	-3316	chr4	137519089	137519091	+	24177	34.8155	41.3935	38.26	36.6505	22.5171	35.4904	94.658	114.469	3	3	FALSE	0	FALSE	FALSE
ENSMUST00000030547	ENSMUSG00000028763	Hspg2	protein_coding	4143	cds	GGG	GAC	1350	-3025	chr4	137522479	137522481	+	24184	29.9928	38.5643	44.9385	64.6667	16.4734	39.0958	120.236	113.496	3	3	FALSE	0	FALSE	FALSE
ENSMUST00000030547	ENSMUSG00000028763	Hspg2	protein_coding	6231	cds	AGG	ATA	2046	-2329	chr4	137540220	137540222	+	24198	42.4206	30.25	63.1969	35.9262	32.5366	38.0141	106.477	135.868	3	3	FALSE	0	FALSE	FALSE
ENSMUST00000030547	ENSMUSG00000028763	Hspg2	protein_coding	6777	cds	GCC	GAG	2228	-2147	chr4	137541760	137541762	+	24204	27.1803	30.9167	30.4168	44.3441	14.0051	31.085	89.4342	88.5139	3	3	FALSE	0	FALSE	FALSE
ENSMUST00000030547	ENSMUSG00000028763	Hspg2	protein_coding	10650	cds	GGC	ATC	3519	-856	chr4	137557313	137557315	+	24242	19.1783	27.1154	15.1022	26.383	10.9344	20.727	58.0443	61.3958	3	3	FALSE	0	FALSE	FALSE
ENSMUST00000030547	ENSMUSG00000028763	Hspg2	protein_coding	11463	cds	GCC	ATC	3790	-585	chr4	137561969	137561971	+	24250	40.0879	37.3156	29.0542	42.3325	44.6689	48.1119	135.113	106.458	3	3	FALSE	0	FALSE	FALSE
ENSMUST00000030547	ENSMUSG00000028763	Hspg2	protein_coding	11934	cds	AAT	GGG	3947	-428	chr4	137564460	137564462	+	24254	10.2974	20.8513	16.6667	18.2998	16	19.0438	53.3436	47.8153	3	3	FALSE	0	FALSE	FALSE
ENSMUST00000030547	ENSMUSG00000028763	Hspg2	protein_coding	13080	cds	GGC	AAG	4329	-46	chr4	137569523	137569525	+	24264	16.2384	15.9581	20.9843	24.6963	18.7973	16.8823	60.3759	53.1808	3	3	FALSE	0	FALSE	FALSE
ENSMUST00000171332	ENSMUSG00000028763	Hspg2	protein_coding	59	cds	ATG	GGG	0	-4383	chr4	137468861	137468863	+	24150	54.7846	47.7546	44.8599	40.2393	14.8221	23.726	78.7874	147.399	3	3	TRUE	0	FALSE	FALSE
ENSMUST00000171332	ENSMUSG00000028763	Hspg2	protein_coding	1040	cds	AAC	GAG	327	-4056	chr4	137511268	137511270	+	24156	40.7574	46.8957	29.2893	42.6019	12.051	30.1358	84.7887	116.942	3	3	FALSE	0	FALSE	FALSE
ENSMUST00000171332	ENSMUSG00000028763	Hspg2	protein_coding	1379	cds	AGG	CTC	440	-3943	chr4	137512212	137512214	+	24159	11.8158	15.6434	17.5248	13.7891	11.4527	19.8802	45.122	44.984	3	3	FALSE	0	FALSE	FALSE
ENSMUST00000171332	ENSMUSG00000028763	Hspg2	protein_coding	1844	cds	TGG	GCC	595	-3788	chr4	137514741	137514743	+	24163	27.6398	26.8518	40.3617	37.8767	17.5931	21.5894	77.0593	94.8533	3	3	FALSE	0	FALSE	FALSE
ENSMUST00000171332	ENSMUSG00000028763	Hspg2	protein_coding	3236	cds	CAA	GAG	1059	-3324	chr4	137519089	137519091	+	24177	34.8155	41.3935	38.26	36.6505	22.5171	35.4904	94.658	114.469	3	3	FALSE	0	FALSE	FALSE
ENSMUST00000171332	ENSMUSG00000028763	Hspg2	protein_coding	4109	cds	GGG	GAC	1350	-3033	chr4	137522479	137522481	+	24184	29.9928	38.5643	44.9385	64.6667	16.4847	39.1094	120.261	113.496	3	3	FALSE	0	FALSE	FALSE
ENSMUST00000171332	ENSMUSG00000028763	Hspg2	protein_coding	6215	cds	AGG	ATA	2052	-2331	chr4	137540220	137540222	+	24198	34.5137	29.7288	44.6713	30.7249	30.4636	38.0141	99.2025	108.914	3	3	FALSE	0	FALSE	FALSE
ENSMUST00000171332	ENSMUSG00000028763	Hspg2	protein_coding	6761	cds	GCC	GAG	2234	-2149	chr4	137541760	137541762	+	24204	27.1803	30.9167	30.4168	44.3441	14.0051	31.085	89.4342	88.5139	3	3	FALSE	0	FALSE	FALSE
ENSMUST00000171332	ENSMUSG00000028763	Hspg2	protein_coding	10640	cds	GGC	ATC	3527	-856	chr4	137557313	137557315	+	24242	19.1783	27.1411	15.1027	26.4011	10.9426	20.7348	58.0785	61.4221	3	3	FALSE	0	FALSE	FALSE
ENSMUST00000171332	ENSMUSG00000028763	Hspg2	protein_coding	11453	cds	GCC	ATC	3798	-585	chr4	137561969	137561971	+	24250	40.0879	37.3156	29.0542	42.3325	44.6689	48.1119	135.113	106.458	3	3	FALSE	0	FALSE	FALSE
ENSMUST00000171332	ENSMUSG00000028763	Hspg2	protein_coding	11924	cds	AAT	GGG	3955	-428	chr4	137564460	137564462	+	24254	10.2974	20.8513	16.6667	18.2998	16	19.0438	53.3436	47.8153	3	3	FALSE	0	FALSE	FALSE
ENSMUST00000171332	ENSMUSG00000028763	Hspg2	protein_coding	13070	cds	GGC	AAG	4337	-46	chr4	137569523	137569525	+	24264	16.2384	15.9755	20.9849	24.7136	18.7973	16.889	60.3998	53.1988	3	3	FALSE	0	FALSE	FALSE
ENSMUST00000061799	ENSMUSG00000032334	Loxl1	protein_coding	41	5utr	NA	NA	-260	-2083	chr9	58313172	58313170	-	33973	23.6917	45.8981	31.7223	55.6419	33.4216	36.3239	125.387	101.312	3	3	FALSE	0	FALSE	TRUE
ENSMUST00000061799	ENSMUSG00000032334	Loxl1	protein_coding	300	cds	ATG	GCT	0	-607	chr9	58312913	58312911	-	33970	20.2251	18.8609	12.9702	22.4047	18.0996	15.0191	55.5234	52.0563	3	3	TRUE	0	FALSE	TRUE
ENSMUST00000061799	ENSMUSG00000032334	Loxl1	protein_coding	1323	cds	CCG	GAG	341	-266	chr9	58311890	58311888	-	33966	25.265	27.739	34.7011	46.9872	37.1062	50.9672	135.061	87.7051	3	3	FALSE	0	FALSE	TRUE
ENSMUST00000061799	ENSMUSG00000032334	Loxl1	protein_coding	1752	cds	TAC	CAC	484	-123	chr9	58294381	58294379	-	33962	20.6998	18.9292	29.017	18.3358	13.9847	12.8544	45.1748	68.646	3	3	FALSE	0	FALSE	TRUE
ENSMUST00000061799	ENSMUSG00000032334	Loxl1	protein_coding	2118	cds	TCC	NA	606	-1	chr9	58290780	58290778	-	33961	19.8177	45.1256	27.8938	35.6138	17.0927	29.5904	82.2969	92.8371	3	3	TRUE	0	FALSE	TRUE
ENSMUST00000031531	ENSMUSG00000029551	Psmg3	protein_coding	548	cds	TGG	NA	121	-1	chr5	139823927	139823925	-	26414	40.2227	35.4749	36.6642	41.7193	26.8363	34.4803	103.036	112.362	3	3	TRUE	0	FALSE	FALSE
ENSMUST00000182602	ENSMUSG00000029551	Psmg3	protein_coding	419	cds	TGG	NA	121	-1	chr5	139823927	139823925	-	26414	40.2227	35.4749	36.6642	41.7193	26.8363	34.4803	103.036	112.362	3	3	TRUE	0	FALSE	FALSE
ENSMUST00000043552	ENSMUSG00000060147	Serpinb6a	protein_coding	287	cds	ATG	GAT	0	-378	chr13	33931637	33931635	-	9446	73.9493	71.879	70.1168	72.8826	58.1153	78.4744	209.472	215.945	3	3	TRUE	0	FALSE	TRUE
ENSMUST00000164627	ENSMUSG00000060147	Serpinb6a	protein_coding	33	5utr	NA	NA	-256	-689	chr13	33935945	33935943	-	9447	16.5421	13.169	20.3471	20.6954	12.9885	17.0552	50.739	50.0582	3	3	FALSE	0	FALSE	FALSE
ENSMUST00000020238	ENSMUSG00000020048	Hsp90b1	protein_coding	487	cds	TTA	GAC	111	-691	chr10	86702987	86702985	-	3527	14.8572	16.6787	13.4696	17.2169	18.2448	12.8469	48.3085	45.0054	3	3	FALSE	0	FALSE	TRUE
ENSMUST00000020238	ENSMUSG00000020048	Hsp90b1	protein_coding	646	cds	ACC	ATA	164	-638	chr10	86701948	86701946	-	3525	24.0291	20.312	35.3262	14.9112	22.94	37.71	75.5612	79.6673	3	3	FALSE	0	FALSE	TRUE
ENSMUST00000020238	ENSMUSG00000020048	Hsp90b1	protein_coding	928	cds	CTT	GAA	258	-544	chr10	86698665	86698663	-	3518	24.8477	20.1023	23.0678	18.2127	22.0736	22.9204	63.2068	68.0178	3	3	FALSE	0	FALSE	TRUE
ENSMUST00000020238	ENSMUSG00000020048	Hsp90b1	protein_coding	1231	cds	AAA	TCA	359	-443	chr10	86696734	86696732	-	3512	29.9379	26.7915	45.6037	27.6103	16.8618	25.7749	70.247	102.333	3	3	FALSE	0	FALSE	TRUE
ENSMUST00000020238	ENSMUSG00000020048	Hsp90b1	protein_coding	1288	cds	GGG	GAG	378	-424	chr10	86695922	86695920	-	3509	12.6484	11.68	17.1792	12.8527	17.938	13.6557	44.4464	41.5076	3	3	FALSE	0	FALSE	FALSE
ENSMUST00000020238	ENSMUSG00000020048	Hsp90b1	protein_coding	1588	cds	AAG	TAT	478	-324	chr10	86694560	86694558	-	3503	12.8978	16.4713	20.1062	14.7784	16.1921	13.3787	44.3493	49.4753	3	3	FALSE	0	FALSE	FALSE
ENSMUST00000020238	ENSMUSG00000020048	Hsp90b1	protein_coding	1642	cds	ATT	GAA	496	-306	chr10	86694506	86694504	-	3502	26.0187	18.6512	40.2819	15.3421	18.1491	43.6933	77.1845	84.9518	3	3	FALSE	0	FALSE	FALSE
ENSMUST00000020238	ENSMUSG00000020048	Hsp90b1	protein_coding	1717	cds	ACT	AGT	521	-281	chr10	86694431	86694429	-	3501	22.8732	20.3724	37.0437	15.7067	19.2534	30.1353	65.0953	80.2893	3	3	FALSE	0	FALSE	FALSE
ENSMUST00000020238	ENSMUSG00000020048	Hsp90b1	protein_coding	1798	cds	GCG	GAA	548	-254	chr10	86694159	86694350	-	3499	21.9476	11.4716	28.1614	16.8523	20.2122	24.7272	61.7917	61.5806	3	3	FALSE	0	FALSE	FALSE
ENSMUST00000020238	ENSMUSG00000020048	Hsp90b1	protein_coding	1870	cds	GAT	GAA	572	-230	chr10	86694088	86694086	-	3497	58.4893	48.1422	111.952	63.2718	41.7495	83.008	188.029	218.584	3	3	FALSE	0	FALSE	FALSE
ENSMUST00000020238	ENSMUSG00000020048	Hsp90b1	protein_coding	2074	cds	ACA	GAG	640	-162	chr10	86693484	86693482	-	3495	28.0474	28.3493	19.0683	22.0752	23.5581	20.102	65.7353	75.465	3	3	FALSE	0	FALSE	FALSE
ENSMUST00000020238	ENSMUSG00000020048	Hsp90b1	protein_coding	2194	cds	CAA	AAG	680	-122	chr10	86692452	86692450	-	3494	14.2531	13.3604	15.8158	13.1852	14.3506	12.8607	40.3966	43.4293	3	3	FALSE	0	FALSE	FALSE
ENSMUST00000020238	ENSMUSG00000020048	Hsp90b1	protein_coding	2551	cds	GAT	GAA	799	-3	chr10	86691114	86691112	-	3488	19.9328	11.9153	22.5024	15.8914	12.5091	26.8378	55.2384	54.3506	3	3	FALSE	0	FALSE	TRUE
ENSMUST00000129413	ENSMUSG00000020048	Hsp90b1	protein_coding	162	cds	GGG	GAG	54	-318	chr10	86695922	86695920	-	3509	12.6484	11.68	17.1792	12.8527	17.938	13.6557	44.4464	41.5076	3	3	FALSE	0	FALSE	FALSE
ENSMUST00000129413	ENSMUSG00000020048	Hsp90b1	protein_coding	462	cds	AAG	TAT	154	-218	chr10	86694560	86694558	-	3503	12.8978	16.5661	20.1062	14.7784	16.4752	13.3787	44.6324	49.5701	3	3	FALSE	0	FALSE	FALSE
ENSMUST00000129413	ENSMUSG00000020048	Hsp90b1	protein_coding	516	cds	ATT	GAA	172	-200	chr10	86694506	86694504	-	3502	26.0187	18.6512	40.2819	15.3421	18.1491	43.6933	77.1845	84.9518	3	3	FALSE	0	FALSE	FALSE
ENSMUST00000129413	ENSMUSG00000020048	Hsp90b1	protein_coding	591	cds	ACT	AGT	197	-175	chr10	86694431	86694429	-	3501	22.8732	20.3724	37.0437	15.7067	19.2534	30.1353	65.0953	80.2893	3	3	FALSE	0	FALSE	FALSE
ENSMUST00000129413	ENSMUSG00000020048	Hsp90b1	protein_coding	672	cds	GCG	GAA	224	-148	chr10	86694159	86694350	-	3499	21.9476	11.4716	28.1614	16.8523	20.2122	24.7272	61.7917	61.5806	3	3	FALSE	0	FALSE	FALSE
ENSMUST00000129413	ENSMUSG00000020048	Hsp90b1	protein_coding	744	cds	GAT	GAA	248	-124	chr10	86694088	86694086	-	3497	58.4893	48.1422	111.952	63.2718	41.7495	83.008	188.029	218.584	3	3	FALSE	0	FALSE	FALSE
ENSMUST00000129413	ENSMUSG00000020048	Hsp90b1	protein_coding	948	cds	ACA	GAG	316	-56	chr10	86693484	86693482	-	3495	29.4335	28.4834	20.2599	22.632	24.0475	20.9568	67.6363	78.1768	3	3	FALSE	0	FALSE	FALSE
ENSMUST00000129413	ENSMUSG00000020048	Hsp90b1	protein_coding	1068	cds	CAA	AAG	356	-16	chr10	86692452	86692450	-	3494	14.2531	13.3604	15.8158	13.1852	14.6951	12.8607	40.7411	43.4293	3	3	FALSE	0	FALSE	FALSE
ENSMUST00000082437	ENSMUSG00000037072	Selenof	protein_coding	548	cds	GCA	GGA	83	-79	chr3	144590617	144590619	+	22443	17.5598	10.2346	18.1252	15.1039	10.8959	25.5263	51.5261	45.9196	3	3	FALSE	0	FALSE	FALSE
ENSMUST00000106211	ENSMUSG00000037072	Selenof	protein_coding	281	cds	GCA	GGA	83	-38	chr3	144590617	144590619	+	22443	17.5598	10.2346	18.1252	15.1039	10.8959	25.5263	51.5261	45.9196	3	3	FALSE	0	FALSE	FALSE
ENSMUST00000151086	ENSMUSG00000037072	Selenof	protein_coding	108	cds	GCA	GGA	36	-9	chr3	144590617	144590619	+	22443	17.5598	10.2346	18.1252	15.2882	10.8959	24.0703	50.2544	45.9196	3	3	FALSE	0	FALSE	FALSE
ENSMUST00000111996	ENSMUSG00000018770	Atp5g3	protein_coding	316	cds	CGA	AGG	55	-86	chr2	73909330	73909328	-	19141	15.2823	15.9841	25.6897	16.533	15.0723	21.1094	52.7147	56.9561	3	3	FALSE	0	FALSE	FALSE
ENSMUST00000111996	ENSMUSG00000018770	Atp5g3	protein_coding	571	cds	ATG	NA	140	-1	chr2	73908599	73908597	-	19135	37.3577	44.117	40.5618	37.6915	34.2606	45.4059	117.358	122.037	3	3	TRUE	0	FALSE	FALSE
ENSMUST00000018914	ENSMUSG00000018770	Atp5g3	protein_coding	307	cds	CGA	AGG	55	-86	chr2	73909330	73909328	-	19141	15.2823	15.9841	25.6897	16.533	15.0723	21.1094	52.7147	56.9561	3	3	FALSE	0	FALSE	FALSE
ENSMUST00000018914	ENSMUSG00000018770	Atp5g3	protein_coding	562	cds	ATG	NA	140	-1	chr2	73908599	73908597	-	19135	37.3577	44.117	40.5618	37.6915	34.2606	45.4059	117.358	122.037	3	3	TRUE	0	FALSE	FALSE
ENSMUST00000138092	ENSMUSG00000025511	Tspan4	protein_coding	68	cds	ATG	GCG	0	-153	chr7	141482503	141482505	+	31041	12.2152	19.788	10.3096	16.3026	11.2752	14.3973	41.9751	42.3128	3	3	TRUE	0	FALSE	FALSE
ENSMUST00000146305	ENSMUSG00000025511	Tspan4	protein_coding	256	cds	ATG	GCG	0	-157	chr7	141482503	141482505	+	31041	12.7476	21.477	10.2599	16.5026	12.5512	16.3742	45.428	44.4845	3	3	TRUE	0	FALSE	FALSE
ENSMUST00000140858	ENSMUSG00000025511	Tspan4	protein_coding	241	cds	ATG	GCG	0	-43	chr7	141482503	141482505	+	31041	17.277	23.1872	15.6794	20.9443	15.0786	18.6373	54.6602	56.1437	3	3	TRUE	0	FALSE	FALSE
ENSMUST00000150576	ENSMUSG00000048758	Rpl29	protein_coding	131	cds	ATG	GCC	0	-160	chr9	106429977	106429979	+	34932	177.729	184.548	186.202	145.872	52.7505	98.2468	296.869	548.479	3	3	TRUE	0	FALSE	TRUE
ENSMUST00000150576	ENSMUSG00000048758	Rpl29	protein_coding	608	cds	CCA	NA	159	-1	chr9	106431443	106431445	+	34944	65.8615	68.2182	83.4565	91.3789	24.3442	43.5995	159.323	217.536	3	3	TRUE	0	FALSE	FALSE
ENSMUST00000098994	ENSMUSG00000048758	Rpl29	protein_coding	407	cds	GTC	CAA	122	-38	chr9	7752078	7752080	+	33128	23.5998	27.4391	10.2567	25.6074	17.4979	19.5912	62.6965	61.2957	3	3	FALSE	0	FALSE	TRUE
ENSMUST00000098994	ENSMUSG00000048758	Rpl29	protein_coding	518	cds	CCA	NA	159	-1	chr9	7752189	7752191	+	33131	74.8324	76.8529	94.9777	100.128	26.3446	47.8923	174.365	246.663	3	3	TRUE	0	FALSE	TRUE
ENSMUST00000059802	ENSMUSG00000048758	Rpl29	protein_coding	475	cds	GTC	CAA	122	-38	chr9	106431332	106431334	+	34941	23.8649	27.5574	10.3152	26.1032	17.4979	19.5912	63.1924	61.7375	3	3	FALSE	0	FALSE	FALSE
ENSMUST00000059802	ENSMUSG00000048758	Rpl29	protein_coding	586	cds	CCA	NA	159	-1	chr9	106431443	106431445	+	34944	73.5114	75.874	93.0433	98.8617	26.0719	47.0401	171.974	242.429	3	3	TRUE	0	FALSE	FALSE
ENSMUST00000020484	ENSMUSG00000020250	Txnrd1	protein_coding	1652	cds	GGT	NA	498	-1	chr10	82890501	82890503	+	3411	15.2318	17.2582	25.3866	25.9567	13.8636	24.1138	63.9342	57.8766	3	3	TRUE	0	FALSE	TRUE
ENSMUST00000103147	ENSMUSG00000069744	Psmb3	protein_coding	701	cds	GAC	NA	204	-1	chr11	97713435	97713437	+	6585	24.1527	30.6717	26.6299	30.4431	12.8066	17.6865	60.9362	81.4544	3	3	TRUE	0	FALSE	TRUE
ENSMUST00000102869	ENSMUSG00000020290	Xpo1	protein_coding	2980	cds	CCT	TTG	778	-293	chr11	23289778	23289780	+	4655	41.3791	41.4741	47.7724	68.6709	39.9464	54.0658	162.683	130.626	3	3	FALSE	0	FALSE	FALSE
ENSMUST00000102870	ENSMUSG00000020290	Xpo1	protein_coding	2463	cds	CCT	TTG	778	-293	chr11	23289778	23289780	+	4655	41.3791	41.4741	47.7724	68.6709	39.9464	54.0658	162.683	130.626	3	3	FALSE	0	FALSE	FALSE
ENSMUST00000020538	ENSMUSG00000020290	Xpo1	protein_coding	2773	cds	CCT	TTG	778	-293	chr11	23289778	23289780	+	4655	41.3791	41.4741	47.7724	68.6709	39.9464	54.0658	162.683	130.626	3	3	FALSE	0	FALSE	FALSE
ENSMUST00000109551	ENSMUSG00000020290	Xpo1	protein_coding	2534	cds	CCT	TTG	778	-293	chr11	23289778	23289780	+	4655	41.3791	41.4741	47.7724	68.6709	39.9464	54.0658	162.683	130.626	3	3	FALSE	0	FALSE	FALSE
ENSMUST00000004965	ENSMUSG00000004843	Chmp2b	protein_coding	88	5utr	NA	NA	-131	-772	chr16	65562610	65562608	-	13981	15.5736	13.0992	11.2585	12.3619	16.6182	13.9854	42.9655	39.9314	3	3	FALSE	0	FALSE	TRUE
ENSMUST00000004965	ENSMUSG00000004843	Chmp2b	protein_coding	218	cds	ATG	GCC	0	-213	chr16	65562480	65562478	-	13979	27.1117	23.9512	21.8592	30.1039	14.5494	26.9845	71.6378	72.9221	3	3	TRUE	0	FALSE	TRUE
ENSMUST00000040917	ENSMUSG00000036781	Rps27l	protein_coding	98	cds	GCT	AGA	3	-81	chr9	66946833	66946835	+	34250	36.4177	60.0544	32.1828	47.0907	15.0465	18.5043	80.6415	128.655	3	3	TRUE	0	FALSE	FALSE
ENSMUST00000127896	ENSMUSG00000036781	Rps27l	protein_coding	93	cds	GCT	AGA	3	-102	chr9	66946833	66946835	+	34250	41.7122	63.673	43.359	59.6663	21.1671	28.7511	109.584	148.744	3	3	TRUE	0	FALSE	FALSE
ENSMUST00000147394	ENSMUSG00000036781	Rps27l	nonsense_mediated_decay	18	cds	GCT	AGA	3	-74	chr9	66946833	66946835	+	34250	46.211	69.2155	42.9652	56.0652	18.7593	24.1195	98.944	158.392	3	3	TRUE	0	FALSE	FALSE
ENSMUST00000146573	ENSMUSG00000036781	Rps27l	protein_coding	33	cds	AGG	AAA	11	-21	chr9	66947674	66947676	+	34254	19.3752	18.5657	28.0364	33.8694	35.3333	51.304	120.507	65.9773	3	3	FALSE	0	FALSE	TRUE
ENSMUST00000146573	ENSMUSG00000036781	Rps27l	protein_coding	155	3utr	NA	NA	154	55	chr9	66949352	66949354	+	34262	23.979	14.4583	25.0058	13.1347	13.9465	19.999	47.0801	63.4431	3	3	FALSE	0	FALSE	FALSE
ENSMUST00000027425	ENSMUSG00000026223	Itm2c	protein_coding	1187	cds	GTG	NA	268	-1	chr1	85907632	85907634	+	1175	78.652	107.943	101.263	97.8489	55.9958	105.2	259.045	287.858	3	3	TRUE	0	FALSE	FALSE
ENSMUST00000185569	ENSMUSG00000026223	Itm2c	protein_coding	738	cds	GTG	NA	231	-1	chr1	85907632	85907634	+	1175	89.5614	120.525	115.202	109.71	62.4944	118.215	290.419	325.288	3	3	TRUE	0	FALSE	FALSE
ENSMUST00000163279	ENSMUSG00000037062	Sh3glb1	protein_coding	1101	cds	GCT	TTG	273	-92	chr3	144692059	144692057	-	22448	27.447	15.9099	23.0281	16.7349	18.1333	23.9536	58.8218	66.3849	3	3	FALSE	0	FALSE	TRUE
ENSMUST00000041045	ENSMUSG00000037894	H2az1	protein_coding	507	cds	ATC	AAA	100	-28	chr3	137866115	137866117	+	22371	23.5444	29.0428	37.2484	33.2343	12.549	27.1408	72.9241	89.8356	3	3	FALSE	0	FALSE	FALSE
ENSMUST00000041045	ENSMUSG00000037894	H2az1	protein_coding	588	cds	GTT	NA	127	-1	chr3	137866441	137866443	+	22375	26.4981	42.5938	27.7592	32.4482	24.8449	30.6509	87.9441	96.8511	3	3	TRUE	0	FALSE	FALSE
ENSMUST00000174561	ENSMUSG00000037894	H2az1	protein_coding	352	cds	ATC	AAA	77	-28	chr3	137866115	137866117	+	22371	25.0396	30.7755	37.3734	35.009	12.6508	27.52	75.1798	93.1885	3	3	FALSE	0	FALSE	FALSE
ENSMUST00000174561	ENSMUSG00000037894	H2az1	protein_coding	433	cds	GTT	NA	104	-1	chr3	137866441	137866443	+	22375	28.1306	44.9469	29.4398	34.526	27.8406	32.7741	95.1407	102.517	3	3	TRUE	0	FALSE	FALSE
ENSMUST00000173790	ENSMUSG00000037894	H2az1	protein_coding	291	cds	GGA	AAT	70	-17	chr3	137866025	137866027	+	22366	20.4285	11.1502	19.5982	20.1352	16.1053	22.8125	59.053	51.1769	3	3	FALSE	0	FALSE	FALSE
ENSMUST00000087557	ENSMUSG00000067377	Tspan6	protein_coding	867	cds	GTA	NA	244	-1	chrX	133892704	133892702	-	36738	24.2843	18.639	18.384	22.6779	17.2923	16.3475	56.3176	61.3073	3	3	TRUE	0	FALSE	TRUE
ENSMUST00000080861	ENSMUSG00000062997	Rpl35	protein_coding	538	cds	ATG	GCC	0	-123	chr2	39005087	39005085	-	18973	152.734	191.288	170.972	193.361	101.733	189.119	484.212	514.993	3	3	TRUE	0	FALSE	TRUE
ENSMUST00000080861	ENSMUSG00000062997	Rpl35	protein_coding	904	cds	GCC	NA	122	-1	chr2	39001622	39001620	-	18964	108.019	90.2113	142.898	114.032	42.1002	100.266	256.398	341.129	3	3	TRUE	0	FALSE	TRUE
ENSMUST00000002073	ENSMUSG00000002020	Ltbp2	protein_coding	1588	cds	CAC	AGA	429	-1380	chr12	84830083	84830081	-	8294	16.4285	11.8087	11.7255	14.864	17.3505	15.7275	47.942	39.9627	3	3	FALSE	0	FALSE	FALSE
ENSMUST00000002073	ENSMUSG00000002020	Ltbp2	protein_coding	1699	cds	CCT	GAG	466	-1343	chr12	84829374	84829372	-	8292	40.5288	42.5941	66.4855	67.037	23.1577	47.9799	138.175	149.608	3	3	FALSE	0	FALSE	FALSE
ENSMUST00000002073	ENSMUSG00000002020	Ltbp2	protein_coding	3316	cds	GGG	ATA	1005	-804	chr12	84794044	84794042	-	8288	13.285	13.2908	24.719	17.1958	15.4746	12.4035	45.0739	51.2948	3	3	FALSE	0	FALSE	FALSE
ENSMUST00000163189	ENSMUSG00000002020	Ltbp2	protein_coding	1535	cds	CAC	AGA	429	-1337	chr12	84830083	84830081	-	8294	16.4322	11.7856	11.7577	14.864	17.3505	15.7275	47.942	39.9755	3	3	FALSE	0	FALSE	FALSE
ENSMUST00000163189	ENSMUSG00000002020	Ltbp2	protein_coding	1646	cds	CCT	GAG	466	-1300	chr12	84829374	84829372	-	8292	40.5369	42.5941	66.4855	67.0716	23.1303	48.2466	138.448	149.616	3	3	FALSE	0	FALSE	FALSE
ENSMUST00000163189	ENSMUSG00000002020	Ltbp2	protein_coding	3134	cds	GGG	ATA	962	-804	chr12	84794044	84794042	-	8288	13.2881	13.2655	24.719	17.2063	15.4746	12.4864	45.1673	51.2726	3	3	FALSE	0	FALSE	FALSE
ENSMUST00000165141	ENSMUSG00000002020	Ltbp2	protein_coding	234	cds	TGG	GAT	78	-103	chr12	84794045	84794043	-	8289	11.6145	14.893	20.1797	17.1698	14.9175	10.9697	43.057	46.6872	3	3	FALSE	0	FALSE	TRUE
ENSMUST00000165141	ENSMUSG00000002020	Ltbp2	protein_coding	525	cds	TTC	CTA	175	-6	chr12	84791881	84791879	-	8283	10.9697	18.2311	15.9534	12.4541	15.7063	10.7719	38.9323	45.1542	3	3	FALSE	0	FALSE	TRUE
ENSMUST00000110254	ENSMUSG00000002020	Ltbp2	protein_coding	1551	cds	CAC	AGA	449	-1337	chr12	84830083	84830081	-	8294	16.4459	11.789	11.77	14.864	17.3505	15.7275	47.942	40.005	3	3	FALSE	0	FALSE	FALSE
ENSMUST00000110254	ENSMUSG00000002020	Ltbp2	protein_coding	1662	cds	CCT	GAG	486	-1300	chr12	84829374	84829372	-	8292	40.567	42.5941	66.4855	67.1788	23.1332	48.3306	138.643	149.647	3	3	FALSE	0	FALSE	FALSE
ENSMUST00000110254	ENSMUSG00000002020	Ltbp2	protein_coding	3150	cds	GGG	ATA	982	-804	chr12	84794044	84794042	-	8288	13.2997	13.2692	24.719	17.2389	15.4746	12.5125	45.2261	51.288	3	3	FALSE	0	FALSE	FALSE
ENSMUST00000047903	ENSMUSG00000034807	Colgalt1	protein_coding	265	cds	CCG	CTG	21	-596	chr8	71611288	71611290	+	32053	11.2004	14.5942	11.1518	20.77	16.1537	10.4975	47.4213	36.9465	3	3	FALSE	0	FALSE	TRUE
ENSMUST00000047903	ENSMUSG00000034807	Colgalt1	protein_coding	523	cds	CAC	TCT	107	-510	chr8	71612185	71612187	+	32055	42.3601	47.4322	73.1246	59.5562	85.6064	55.2406	200.403	162.917	3	3	FALSE	0	FALSE	TRUE
ENSMUST00000022927	ENSMUSG00000022314	Rad21	protein_coding	232	cds	ATG	TTC	0	-635	chr15	51982686	51982684	-	11810	40.846	34.1192	45.1547	41.7338	28.5865	52.2401	122.56	120.12	3	3	TRUE	0	FALSE	TRUE
ENSMUST00000005923	ENSMUSG00000005779	Psmb4	protein_coding	638	cds	CGA	GAA	195	-69	chr3	94885025	94885023	-	21687	42.2973	37.292	36.6471	41.6575	40.3982	43.6105	125.666	116.236	3	3	FALSE	0	FALSE	TRUE
ENSMUST00000005923	ENSMUSG00000005779	Psmb4	protein_coding	842	cds	GAA	NA	263	-1	chr3	94884434	94884432	-	21683	32.8208	37.8703	44.9375	54.2034	19.372	33.3077	106.883	115.629	3	3	TRUE	0	FALSE	TRUE
ENSMUST00000110731	ENSMUSG00000079111	Kdelr2	protein_coding	757	cds	GCC	NA	211	-1	chr5	143420811	143420813	+	26598	80.7932	84.191	54.8484	63.9904	39.036	53.1404	156.167	219.833	3	3	TRUE	0	FALSE	TRUE
ENSMUST00000079644	ENSMUSG00000028639	Ybx1	protein_coding	241	cds	ATG	AGC	0	-322	chr4	119294364	119294362	-	23645	93.009	82.2049	118.415	65.8765	28.6017	62.77	157.248	293.629	3	3	TRUE	0	FALSE	TRUE
ENSMUST00000079644	ENSMUSG00000028639	Ybx1	protein_coding	931	cds	GTG	AGA	230	-92	chr4	119281614	119281612	-	23634	33.2893	15.1912	24.8385	18.9799	11.9115	39.0133	69.9047	73.3191	3	3	FALSE	0	FALSE	FALSE
ENSMUST00000127737	ENSMUSG00000028639	Ybx1	protein_coding	354	cds	GTG	AGA	118	-96	chr4	119281614	119281612	-	23634	33.9355	16.094	24.1175	19.932	12.0622	39.6508	71.6449	74.147	3	3	FALSE	0	FALSE	FALSE
ENSMUST00000101801	ENSMUSG00000075701	Selenos	protein_coding	626	cds	GGC	TGA	187	-3	chr7	66088840	66088842	+	29772	32.9138	47.159	25.0526	31.1983	18.26	28.685	78.1433	105.125	3	3	FALSE	0	FALSE	TRUE
ENSMUST00000188894	ENSMUSG00000026193	Fn1	protein_coding	121	5utr	NA	NA	-70	-7230	chr1	71653052	71653050	-	954	95.001	95.7242	110.23	48.2776	34.6183	65.7319	148.628	300.955	3	3	FALSE	0	FALSE	FALSE
ENSMUST00000188894	ENSMUSG00000026193	Fn1	protein_coding	472	cds	GAA	GAG	94	-2292	chr1	71650698	71650696	-	945	24.0878	28.1094	23.6422	25.9031	10.1259	20.2132	56.2422	75.8394	3	3	FALSE	0	FALSE	FALSE
ENSMUST00000188894	ENSMUSG00000026193	Fn1	protein_coding	517	cds	GGT	GAC	109	-2277	chr1	71650653	71650651	-	944	14.0525	13.5093	13.7658	11.2595	10.8408	19.2709	41.3712	41.3276	3	3	FALSE	0	FALSE	FALSE
ENSMUST00000188894	ENSMUSG00000026193	Fn1	protein_coding	1474	cds	CGG	AAT	428	-1958	chr1	71641261	71641259	-	916	21.2027	12.7727	24.9966	18.0553	24.9865	25.3144	68.3562	58.972	3	3	FALSE	0	FALSE	FALSE
ENSMUST00000188894	ENSMUSG00000026193	Fn1	protein_coding	2677	cds	TGG	AGT	829	-1557	chr1	71628085	71628083	-	873	29.2507	24.4224	38.3913	21.7639	14.2009	27.9843	63.9491	92.0644	3	3	FALSE	0	FALSE	FALSE
ENSMUST00000188894	ENSMUSG00000026193	Fn1	protein_coding	2710	cds	AGA	ATT	840	-1546	chr1	71627353	71627351	-	872	20.1035	15.0267	34.9461	15.575	16.555	17.43	49.5601	70.0764	3	3	FALSE	0	FALSE	FALSE
ENSMUST00000188894	ENSMUSG00000026193	Fn1	protein_coding	2974	cds	CCT	GAT	928	-1458	chr1	71626173	71626171	-	866	53.0909	74.7863	72.7035	71.32	83.8781	82.6053	237.803	200.581	3	3	FALSE	0	FALSE	FALSE
ENSMUST00000188894	ENSMUSG00000026193	Fn1	protein_coding	3028	cds	GGG	GAA	946	-1440	chr1	71626119	71626117	-	865	38.8171	45.5799	60.7073	50.7822	81.8165	81.2319	213.831	145.104	3	3	FALSE	0	FALSE	FALSE
ENSMUST00000188894	ENSMUSG00000026193	Fn1	protein_coding	3361	cds	GGG	TCT	1057	-1329	chr1	71624157	71624155	-	852	22.2657	23.9752	26.1029	16.8865	14.2539	20.2132	51.3535	72.3438	3	3	FALSE	0	FALSE	FALSE
ENSMUST00000188894	ENSMUSG00000026193	Fn1	protein_coding	3625	cds	GTG	GAA	1145	-1241	chr1	71619463	71619461	-	845	39.5162	29.6539	40.103	29.5959	24.7067	51.164	105.467	109.273	3	3	FALSE	0	FALSE	FALSE
ENSMUST00000188894	ENSMUSG00000026193	Fn1	protein_coding	3742	cds	CCT	GAC	1184	-1202	chr1	71618628	71618626	-	840	20.5272	18.7526	21.544	16.6244	20.7634	27.8542	65.2419	60.8237	3	3	FALSE	0	FALSE	FALSE
ENSMUST00000188894	ENSMUSG00000026193	Fn1	protein_coding	4024	cds	CCA	GAC	1278	-1108	chr1	71612610	71612608	-	825	28.0816	51.9257	15.6447	32.448	34.8935	37.4789	104.82	95.652	3	3	FALSE	0	FALSE	FALSE
ENSMUST00000188894	ENSMUSG00000026193	Fn1	protein_coding	4141	cds	TCA	GAC	1317	-1069	chr1	71612493	71612491	-	824	26.156	35.5777	21.1468	15.2982	10.2132	17.3972	42.9087	82.8805	3	3	FALSE	0	FALSE	FALSE
ENSMUST00000188894	ENSMUSG00000026193	Fn1	protein_coding	4279	cds	GAT	TCT	1363	-1023	chr1	71609660	71609658	-	818	13.3843	13.6605	17.0603	12.1074	15.3546	28.0613	55.5233	44.1051	3	3	FALSE	0	FALSE	FALSE
ENSMUST00000188894	ENSMUSG00000026193	Fn1	protein_coding	4528	cds	TCT	GAT	1446	-940	chr1	71608019	71608017	-	808	27.1248	22.9083	35.3308	36.5894	24.4361	48.6624	109.688	85.3638	3	3	FALSE	0	FALSE	FALSE
ENSMUST00000188894	ENSMUSG00000026193	Fn1	protein_coding	4759	cds	GGG	GAC	1523	-863	chr1	71606752	71606750	-	799	21.0634	22.0511	21.1334	28.5581	26.0518	26.8538	81.4638	64.2479	3	3	FALSE	0	FALSE	FALSE
ENSMUST00000188894	ENSMUSG00000026193	Fn1	protein_coding	5410	cds	TGG	ATA	1740	-646	chr1	71602436	71602434	-	776	23.8814	20.1591	22.2425	16.9195	10.75	23.5162	51.1857	66.283	3	3	FALSE	0	FALSE	FALSE
ENSMUST00000188894	ENSMUSG00000026193	Fn1	protein_coding	5635	cds	CCA	AGA	1815	-571	chr1	71600456	71600454	-	767	22.1138	22.3748	26.0581	13.7144	16.279	25.2099	55.2034	70.5467	3	3	FALSE	0	FALSE	FALSE
ENSMUST00000188894	ENSMUSG00000026193	Fn1	protein_coding	5806	cds	CAG	CCA	1872	-514	chr1	71599688	71599686	-	756	64.2049	46.8947	96.6705	28.9183	15.8282	44.046	88.7925	207.77	3	3	FALSE	0	FALSE	FALSE
ENSMUST00000188894	ENSMUSG00000026193	Fn1	protein_coding	6208	cds	CCA	GAG	2006	-380	chr1	71597701	71597699	-	744	21.0509	27.4426	17.1827	22.2296	13.9787	14.5234	50.7317	65.6762	3	3	FALSE	0	FALSE	FALSE
ENSMUST00000188894	ENSMUSG00000026193	Fn1	protein_coding	6460	cds	GGA	GAC	2090	-296	chr1	71597449	71597447	-	733	22.1097	24.9289	20.8241	21.4525	23.5	23.9502	68.9026	67.8627	3	3	FALSE	0	FALSE	FALSE
ENSMUST00000188894	ENSMUSG00000026193	Fn1	protein_coding	6496	cds	GGC	CTC	2102	-284	chr1	71597413	71597411	-	732	49.051	54.5968	40.9796	46.1531	10.302	17.9525	74.4076	144.627	3	3	FALSE	0	FALSE	FALSE
ENSMUST00000188894	ENSMUSG00000026193	Fn1	protein_coding	6619	cds	CCC	TTA	2143	-243	chr1	71597290	71597288	-	727	19.6992	23.0417	24.1968	16.2482	12.3275	15.6501	44.2257	66.9376	3	3	FALSE	0	FALSE	FALSE
ENSMUST00000188894	ENSMUSG00000026193	Fn1	protein_coding	6811	cds	CCT	TAC	2207	-179	chr1	71593192	71593190	-	719	25.0516	10.165	30.8322	18.838	13.167	26.8345	58.8395	66.0489	3	3	FALSE	0	FALSE	FALSE
ENSMUST00000188894	ENSMUSG00000026193	Fn1	protein_coding	6949	cds	GGT	GTC	2253	-133	chr1	71590876	71590874	-	711	17.7102	22.1081	27.7947	20.5599	19.7578	14.9157	55.2334	67.613	3	3	FALSE	0	FALSE	FALSE
ENSMUST00000188894	ENSMUSG00000026193	Fn1	protein_coding	7057	cds	CAT	GAA	2289	-97	chr1	71590204	71590767	-	707	75.2607	94.1239	110.23	87.3495	46.1764	74.3648	207.891	279.615	3	3	FALSE	0	FALSE	FALSE
ENSMUST00000188894	ENSMUSG00000026193	Fn1	protein_coding	7345	cds	GAG	NA	2385	-1	chr1	71586218	71586216	-	694	45.9483	68.5632	37.6491	31.9187	27.059	24.3838	83.3614	152.161	3	3	TRUE	0	FALSE	FALSE
ENSMUST00000188674	ENSMUSG00000026193	Fn1	protein_coding	121	5utr	NA	NA	-70	-6870	chr1	71653052	71653050	-	954	97.3101	97.7602	113.343	49.3302	26.5007	66.0599	141.891	308.413	3	3	FALSE	0	FALSE	FALSE
ENSMUST00000188674	ENSMUSG00000026193	Fn1	protein_coding	472	cds	GAA	GAG	94	-2172	chr1	71650698	71650696	-	945	24.7752	28.8479	24.5076	28.6029	10.0627	20.3441	59.0097	78.1308	3	3	FALSE	0	FALSE	FALSE
ENSMUST00000188674	ENSMUSG00000026193	Fn1	protein_coding	517	cds	GGT	GAC	109	-2157	chr1	71650653	71650651	-	944	13.2288	17.3856	12.4234	13.0018	10.7855	17.9327	41.72	43.0378	3	3	FALSE	0	FALSE	FALSE
ENSMUST00000188674	ENSMUSG00000026193	Fn1	protein_coding	1474	cds	CGG	AAT	428	-1838	chr1	71641261	71641259	-	916	23.3833	12.9764	30.9012	19.7683	27.0579	21.7415	68.5677	67.2608	3	3	FALSE	0	FALSE	FALSE
ENSMUST00000188674	ENSMUSG00000026193	Fn1	protein_coding	1768	cds	GTG	AAC	526	-1740	chr1	71638554	71638552	-	903	12.389	10.8514	19.1192	11.4249	14.4375	22.8924	48.7548	42.3596	3	3	FALSE	0	FALSE	FALSE
ENSMUST00000188674	ENSMUSG00000026193	Fn1	protein_coding	2152	cds	AAG	GAA	654	-1612	chr1	71629823	71629821	-	889	19.6715	21.3809	26.5373	13.0288	11.1771	17.3496	41.5555	67.5896	3	3	FALSE	0	FALSE	FALSE
ENSMUST00000188674	ENSMUSG00000026193	Fn1	protein_coding	2677	cds	TGG	AGT	829	-1437	chr1	71628085	71628083	-	873	30.2435	25.0785	39.8079	23.8246	13.4263	25.3583	62.6092	95.1298	3	3	FALSE	0	FALSE	FALSE
ENSMUST00000188674	ENSMUSG00000026193	Fn1	protein_coding	2710	cds	AGA	ATT	840	-1426	chr1	71627353	71627351	-	872	19.6288	15.0069	34.4194	16.8523	16.6139	16.704	50.1702	69.0551	3	3	FALSE	0	FALSE	FALSE
ENSMUST00000188674	ENSMUSG00000026193	Fn1	protein_coding	2974	cds	CCT	GAT	928	-1338	chr1	71626173	71626171	-	866	56.0162	75.106	72.7503	75.4942	84.173	77.2393	236.906	203.873	3	3	FALSE	0	FALSE	FALSE
ENSMUST00000188674	ENSMUSG00000026193	Fn1	protein_coding	3028	cds	GGG	GAA	946	-1320	chr1	71626119	71626117	-	865	39.1585	44.3125	66.0369	54.7669	82.5019	82.6294	219.898	149.508	3	3	FALSE	0	FALSE	FALSE
ENSMUST00000188674	ENSMUSG00000026193	Fn1	protein_coding	3361	cds	GGG	TCT	1057	-1209	chr1	71624157	71624155	-	852	24.7752	26.5418	28.723	18.9189	10.8985	21.5419	51.3592	80.04	3	3	FALSE	0	FALSE	FALSE
ENSMUST00000188674	ENSMUSG00000026193	Fn1	protein_coding	3625	cds	GTG	GAA	1145	-1121	chr1	71619463	71619461	-	845	40.1667	31.3869	38.9604	29.7995	24.2244	48.6522	102.676	110.514	3	3	FALSE	0	FALSE	FALSE
ENSMUST00000188674	ENSMUSG00000026193	Fn1	protein_coding	3742	cds	CCT	GAC	1184	-1082	chr1	71618628	71618626	-	840	21.6688	22.198	23.3768	18.4104	22.0707	27.3642	67.8454	67.2436	3	3	FALSE	0	FALSE	FALSE
ENSMUST00000188674	ENSMUSG00000026193	Fn1	protein_coding	4024	cds	CCA	GAC	1278	-988	chr1	71612610	71612608	-	825	26.0017	49.6709	16.5453	31.7708	34.0232	35.3165	101.11	92.2179	3	3	FALSE	0	FALSE	FALSE
ENSMUST00000188674	ENSMUSG00000026193	Fn1	protein_coding	4141	cds	TCA	GAC	1317	-949	chr1	71612493	71612491	-	824	24.8261	34.5751	22.296	15.8917	10.8166	21.4165	48.1249	81.6971	3	3	FALSE	0	FALSE	FALSE
ENSMUST00000188674	ENSMUSG00000026193	Fn1	protein_coding	4279	cds	GAT	TCT	1363	-903	chr1	71609660	71609658	-	818	13.6427	12.6799	17.157	13.4334	13.6846	27.9301	55.0481	43.4796	3	3	FALSE	0	FALSE	FALSE
ENSMUST00000188674	ENSMUSG00000026193	Fn1	protein_coding	4528	cds	TCT	GAT	1446	-820	chr1	71608019	71608017	-	808	26.3218	27.0844	36.5293	40.8201	27.8937	50.4885	119.202	89.9355	3	3	FALSE	0	FALSE	FALSE
ENSMUST00000188674	ENSMUSG00000026193	Fn1	protein_coding	4759	cds	GGG	GAC	1523	-743	chr1	71606752	71606750	-	799	20.3955	20.1886	20.3096	26.2305	25.5611	24.0888	75.8804	60.8938	3	3	FALSE	0	FALSE	FALSE
ENSMUST00000188674	ENSMUSG00000026193	Fn1	protein_coding	5410	cds	TGG	ATA	1740	-526	chr1	71602436	71602434	-	776	22.3905	20.4959	27.683	16.3691	10.5489	23.0362	49.9542	70.5694	3	3	FALSE	0	FALSE	FALSE
ENSMUST00000188674	ENSMUSG00000026193	Fn1	protein_coding	5635	cds	CCA	AGA	1815	-451	chr1	71600456	71600454	-	767	19.8261	22.2009	27.1293	14.4671	12.282	19.9475	46.6966	69.1563	3	3	FALSE	0	FALSE	FALSE
ENSMUST00000188674	ENSMUSG00000026193	Fn1	protein_coding	5806	cds	CAG	CCA	1872	-394	chr1	71599688	71599686	-	756	66.9704	44.6062	96.0114	29.7681	18.5474	42.4121	90.7276	207.588	3	3	FALSE	0	FALSE	FALSE
ENSMUST00000188674	ENSMUSG00000026193	Fn1	protein_coding	6259	cds	CCC	TTA	2023	-243	chr1	71597290	71597288	-	727	23.2515	22.8255	20.4494	18.2003	10.3413	18.311	46.8525	66.5264	3	3	FALSE	0	FALSE	FALSE
ENSMUST00000188674	ENSMUSG00000026193	Fn1	protein_coding	6361	cds	AGG	AGG	2057	-209	chr1	71595710	71595708	-	722	15.4957	12.0268	10.9248	18.4092	17.3065	22.1408	57.8565	38.4473	3	3	FALSE	0	FALSE	FALSE
ENSMUST00000188674	ENSMUSG00000026193	Fn1	protein_coding	6589	cds	GGT	GTC	2133	-133	chr1	71590876	71590874	-	711	20.5994	21.5226	29.3475	18.9189	15.9135	16.5511	51.3834	71.4696	3	3	FALSE	0	FALSE	FALSE
ENSMUST00000188674	ENSMUSG00000026193	Fn1	protein_coding	6697	cds	CAT	GAA	2169	-97	chr1	71590204	71590767	-	707	80.143	94.0975	112.094	90.1053	48.2323	72.2485	210.586	286.334	3	3	FALSE	0	FALSE	FALSE
ENSMUST00000188674	ENSMUSG00000026193	Fn1	protein_coding	6985	cds	GAG	NA	2265	-1	chr1	71586218	71586216	-	694	45.326	68.1578	36.7696	31.8329	23.9692	24.5928	80.3949	150.253	3	3	TRUE	0	FALSE	FALSE
ENSMUST00000189821	ENSMUSG00000026193	Fn1	protein_coding	121	5utr	NA	NA	-70	-6600	chr1	71653052	71653050	-	954	97.9303	99.5219	112.816	53.1226	29.4393	64.2356	146.797	310.269	3	3	FALSE	0	FALSE	FALSE
ENSMUST00000189821	ENSMUSG00000026193	Fn1	protein_coding	472	cds	GAA	GAG	94	-2082	chr1	71650698	71650696	-	945	23.0783	27.7116	30.9359	29.3171	10.8364	19.0923	59.2458	81.7259	3	3	FALSE	0	FALSE	FALSE
ENSMUST00000189821	ENSMUSG00000026193	Fn1	protein_coding	517	cds	GGT	GAC	109	-2067	chr1	71650653	71650651	-	944	14.6819	13.6692	10.5183	13.538	12.8903	17.7606	44.1889	38.8695	3	3	FALSE	0	FALSE	FALSE
ENSMUST00000189821	ENSMUSG00000026193	Fn1	protein_coding	1474	cds	CGG	AAT	428	-1748	chr1	71641261	71641259	-	916	21.6922	13.8915	27.1447	19.4548	26.9404	21.7006	68.0958	62.7285	3	3	FALSE	0	FALSE	FALSE
ENSMUST00000189821	ENSMUSG00000026193	Fn1	protein_coding	2677	cds	TGG	AGT	829	-1347	chr1	71628085	71628083	-	873	26.4667	25.2499	37.0801	24.252	12.8338	29.7847	66.8705	88.7966	3	3	FALSE	0	FALSE	FALSE
ENSMUST00000189821	ENSMUSG00000026193	Fn1	protein_coding	2710	cds	AGA	ATT	840	-1336	chr1	71627353	71627351	-	872	20.6501	15.7109	34.9635	17.5947	13.8013	19.2015	50.5975	71.3244	3	3	FALSE	0	FALSE	FALSE
ENSMUST00000189821	ENSMUSG00000026193	Fn1	protein_coding	2974	cds	CCT	GAT	928	-1248	chr1	71626173	71626171	-	866	51.2633	75.4045	71.7204	70.9767	83.3042	76.8757	231.157	198.388	3	3	FALSE	0	FALSE	FALSE
ENSMUST00000189821	ENSMUSG00000026193	Fn1	protein_coding	3028	cds	GGG	GAA	946	-1230	chr1	71626119	71626117	-	865	36.9398	44.7835	67.2061	52.9526	87.2398	74.4681	214.66	148.929	3	3	FALSE	0	FALSE	FALSE
ENSMUST00000189821	ENSMUSG00000026193	Fn1	protein_coding	3625	cds	GTG	GAA	1145	-1031	chr1	71619463	71619461	-	845	39.8209	29.5603	40.6705	28.4372	26.0959	50.7137	105.247	110.052	3	3	FALSE	0	FALSE	FALSE
ENSMUST00000189821	ENSMUSG00000026193	Fn1	protein_coding	3742	cds	CCT	GAC	1184	-992	chr1	71618628	71618626	-	840	22.8988	20.3373	23.0797	21.0238	20.9081	30.345	72.2769	66.3157	3	3	FALSE	0	FALSE	FALSE
ENSMUST00000189821	ENSMUSG00000026193	Fn1	protein_coding	4024	cds	CCA	GAC	1278	-898	chr1	71612610	71612608	-	825	26.3896	51.4497	14.5909	29.604	38.3333	35.1433	103.081	92.4303	3	3	FALSE	0	FALSE	FALSE
ENSMUST00000189821	ENSMUSG00000026193	Fn1	protein_coding	4177	cds	GGG	ACA	1329	-847	chr1	71611008	71611006	-	823	13.5903	17.2702	14.7218	12.3869	11.9377	11.2001	35.5247	45.5823	3	3	FALSE	0	FALSE	FALSE
ENSMUST00000189821	ENSMUSG00000026193	Fn1	protein_coding	4279	cds	GAT	TCT	1363	-813	chr1	71609660	71609658	-	818	16.0262	12.159	16.5536	12.5788	13.8906	28.3216	54.791	44.7388	3	3	FALSE	0	FALSE	FALSE
ENSMUST00000189821	ENSMUSG00000026193	Fn1	protein_coding	4528	cds	TCT	GAT	1446	-730	chr1	71608019	71608017	-	808	29.547	25.2728	37.9409	35.7989	24.2824	51.3948	111.476	92.7607	3	3	FALSE	0	FALSE	FALSE
ENSMUST00000189821	ENSMUSG00000026193	Fn1	protein_coding	4759	cds	GGG	GAC	1523	-653	chr1	71606752	71606750	-	799	20.2936	20.092	20.2013	25.7823	27.5662	21.8491	75.1975	60.5869	3	3	FALSE	0	FALSE	FALSE
ENSMUST00000189821	ENSMUSG00000026193	Fn1	protein_coding	5365	cds	CCA	AGA	1725	-451	chr1	71600456	71600454	-	767	19.998	20.3951	26.449	14.0828	15.8502	21.5668	51.4997	66.8422	3	3	FALSE	0	FALSE	FALSE
ENSMUST00000189821	ENSMUSG00000026193	Fn1	protein_coding	5536	cds	CAG	CCA	1782	-394	chr1	71599688	71599686	-	756	61.5172	42.0455	98.8349	29.579	14.14	42.8396	86.5586	202.398	3	3	FALSE	0	FALSE	FALSE
ENSMUST00000189821	ENSMUSG00000026193	Fn1	protein_coding	5989	cds	CCC	TTA	1933	-243	chr1	71597290	71597288	-	727	22.1705	25.4967	24.2107	13.5087	12.7802	19.3043	45.5932	71.878	3	3	FALSE	0	FALSE	FALSE
ENSMUST00000189821	ENSMUSG00000026193	Fn1	protein_coding	6091	cds	AGG	AGG	1967	-209	chr1	71595710	71595708	-	722	16.3016	12.1302	10.0766	16.0541	17.5001	23.105	56.6592	38.5084	3	3	FALSE	0	FALSE	FALSE
ENSMUST00000189821	ENSMUSG00000026193	Fn1	protein_coding	6181	cds	CCT	TAC	1997	-179	chr1	71593192	71593190	-	719	20.3847	10.8798	31.3533	15.6131	10.1301	26.5061	52.2493	62.6178	3	3	FALSE	0	FALSE	FALSE
ENSMUST00000189821	ENSMUSG00000026193	Fn1	protein_coding	6319	cds	GGT	GTC	2043	-133	chr1	71590876	71590874	-	711	18.9199	20.6661	29.3792	21.8354	18.3331	14.6783	54.8468	68.9652	3	3	FALSE	0	FALSE	FALSE
ENSMUST00000189821	ENSMUSG00000026193	Fn1	protein_coding	6427	cds	CAT	GAA	2079	-97	chr1	71590204	71590767	-	707	81.1425	94.2377	112.661	91.0413	52.7622	75.8726	219.676	288.041	3	3	FALSE	0	FALSE	FALSE
ENSMUST00000189821	ENSMUSG00000026193	Fn1	protein_coding	6715	cds	GAG	NA	2175	-1	chr1	71586218	71586216	-	694	40.6216	67.5031	34.8257	32.7334	27.737	23.3404	83.8109	142.95	3	3	TRUE	0	FALSE	FALSE
ENSMUST00000187938	ENSMUSG00000026193	Fn1	protein_coding	121	5utr	NA	NA	-70	-7155	chr1	71653052	71653050	-	954	90.5777	97.0196	108.006	46.681	33.507	64.2478	144.436	295.603	3	3	FALSE	0	FALSE	FALSE
ENSMUST00000187938	ENSMUSG00000026193	Fn1	protein_coding	472	cds	GAA	GAG	94	-2267	chr1	71650698	71650696	-	945	21.5506	27.8281	26.1298	27.2878	13.1478	18.1622	58.5979	75.5085	3	3	FALSE	0	FALSE	FALSE
ENSMUST00000187938	ENSMUSG00000026193	Fn1	protein_coding	1474	cds	CGG	AAT	428	-1933	chr1	71641261	71641259	-	916	22.919	12.6299	26.9325	18.5944	26.904	23.6767	69.1751	62.4815	3	3	FALSE	0	FALSE	FALSE
ENSMUST00000187938	ENSMUSG00000026193	Fn1	protein_coding	1768	cds	GTG	AAC	526	-1835	chr1	71638554	71638552	-	903	12.8889	10.9344	18.4475	11.333	14.179	20.9162	46.4282	42.2708	3	3	FALSE	0	FALSE	FALSE
ENSMUST00000187938	ENSMUSG00000026193	Fn1	protein_coding	2677	cds	TGG	AGT	829	-1532	chr1	71628085	71628083	-	873	26.9325	24.4368	39.2115	21.249	14.5195	27.4187	63.1873	90.5808	3	3	FALSE	0	FALSE	FALSE
ENSMUST00000187938	ENSMUSG00000026193	Fn1	protein_coding	2710	cds	AGA	ATT	840	-1521	chr1	71627353	71627351	-	872	23.0253	17.1081	38.4644	17.751	14.8928	16.6626	49.3064	78.5978	3	3	FALSE	0	FALSE	FALSE
ENSMUST00000187938	ENSMUSG00000026193	Fn1	protein_coding	2974	cds	CCT	GAT	928	-1433	chr1	71626173	71626171	-	866	53.6315	74.4891	69.2226	71.5912	87.1561	75.2768	234.024	197.343	3	3	FALSE	0	FALSE	FALSE
ENSMUST00000187938	ENSMUSG00000026193	Fn1	protein_coding	3028	cds	GGG	GAA	946	-1415	chr1	71626119	71626117	-	865	38.7314	47.1591	67.3758	52.5324	88.5317	77.8371	218.901	153.266	3	3	FALSE	0	FALSE	FALSE
ENSMUST00000187938	ENSMUSG00000026193	Fn1	protein_coding	3361	cds	GGG	TCT	1057	-1304	chr1	71624157	71624155	-	852	23.5272	23.4286	25.9759	17.9256	10.6717	19.5408	48.1382	72.9317	3	3	FALSE	0	FALSE	FALSE
ENSMUST00000187938	ENSMUSG00000026193	Fn1	protein_coding	3625	cds	GTG	GAA	1145	-1216	chr1	71619463	71619461	-	845	38.053	29.2603	38.2938	27.8602	27.2402	49.7897	104.89	105.607	3	3	FALSE	0	FALSE	FALSE
ENSMUST00000187938	ENSMUSG00000026193	Fn1	protein_coding	3742	cds	CCT	GAC	1184	-1177	chr1	71618628	71618626	-	840	22.8132	22.5353	22.2401	19.5046	22.1271	26.3419	67.9735	67.5885	3	3	FALSE	0	FALSE	FALSE
ENSMUST00000187938	ENSMUSG00000026193	Fn1	protein_coding	4024	cds	CCA	GAC	1278	-1083	chr1	71612610	71612608	-	825	31.5468	52.1933	15.5105	27.6789	37.9089	33.3271	98.9149	99.2506	3	3	FALSE	0	FALSE	FALSE
ENSMUST00000187938	ENSMUSG00000026193	Fn1	protein_coding	4279	cds	GAT	TCT	1363	-998	chr1	71609660	71609658	-	818	13.0078	12.1347	18.5744	14.0582	12.5976	29.979	56.6348	43.7169	3	3	FALSE	0	FALSE	FALSE
ENSMUST00000187938	ENSMUSG00000026193	Fn1	protein_coding	4528	cds	TCT	GAT	1446	-915	chr1	71608019	71608017	-	808	28.2405	23.9619	36.1335	34.76	28.2796	51.0523	114.092	88.3358	3	3	FALSE	0	FALSE	FALSE
ENSMUST00000187938	ENSMUSG00000026193	Fn1	protein_coding	4759	cds	GGG	GAC	1523	-838	chr1	71606752	71606750	-	799	19.0028	22.3344	20.566	29.4449	27.0564	26.131	82.6323	61.9032	3	3	FALSE	0	FALSE	FALSE
ENSMUST00000187938	ENSMUSG00000026193	Fn1	protein_coding	5410	cds	TGG	ATA	1740	-621	chr1	71602436	71602434	-	776	22.1661	20.0042	29.1258	17.621	11.3658	23.982	52.9687	71.2961	3	3	FALSE	0	FALSE	FALSE
ENSMUST00000187938	ENSMUSG00000026193	Fn1	protein_coding	5623	cds	AAT	GTT	1811	-550	chr1	71600466	71601201	-	768	10.9108	10.5639	19.6409	17.0667	12.5365	13.6474	43.2505	41.1156	3	3	FALSE	0	FALSE	FALSE
ENSMUST00000187938	ENSMUSG00000026193	Fn1	protein_coding	5635	cds	CCA	AGA	1815	-546	chr1	71600456	71600454	-	767	19.8782	22.2288	23.3098	12.0742	14.8205	21.9103	48.805	65.4168	3	3	FALSE	0	FALSE	FALSE
ENSMUST00000187938	ENSMUSG00000026193	Fn1	protein_coding	5806	cds	CAG	CCA	1872	-489	chr1	71599688	71599686	-	756	65.063	42.1367	102.366	28.8175	13.3415	40.8966	83.0556	209.565	3	3	FALSE	0	FALSE	FALSE
ENSMUST00000187938	ENSMUSG00000026193	Fn1	protein_coding	6385	cds	GGA	GAC	2065	-296	chr1	71597449	71597447	-	733	22.1097	24.9289	20.8241	21.4525	23.5	23.9502	68.9026	67.8627	3	3	FALSE	0	FALSE	FALSE
ENSMUST00000187938	ENSMUSG00000026193	Fn1	protein_coding	6421	cds	GGC	CTC	2077	-284	chr1	71597413	71597411	-	732	49.051	54.5968	40.9796	46.1531	10.302	17.9525	74.4076	144.627	3	3	FALSE	0	FALSE	FALSE
ENSMUST00000187938	ENSMUSG00000026193	Fn1	protein_coding	6544	cds	CCC	TTA	2118	-243	chr1	71597290	71597288	-	727	23.3513	24.6285	24.5472	15.6933	11.0539	17.5775	44.3247	72.527	3	3	FALSE	0	FALSE	FALSE
ENSMUST00000187938	ENSMUSG00000026193	Fn1	protein_coding	6736	cds	CCT	TAC	2182	-179	chr1	71593192	71593190	-	719	22.2037	11.8216	26.7865	17.2118	10.3796	30.6244	58.2158	60.8118	3	3	FALSE	0	FALSE	FALSE
ENSMUST00000187938	ENSMUSG00000026193	Fn1	protein_coding	6874	cds	GGT	GTC	2228	-133	chr1	71590876	71590874	-	711	19.422	20.0957	26.7454	17.9256	18.3752	12.8447	49.1454	66.2632	3	3	FALSE	0	FALSE	FALSE
ENSMUST00000187938	ENSMUSG00000026193	Fn1	protein_coding	6982	cds	CAT	GAA	2264	-97	chr1	71590204	71590767	-	707	79.9347	98.0862	106.929	88.1423	48.3636	72.1257	208.632	284.95	3	3	FALSE	0	FALSE	FALSE
ENSMUST00000187938	ENSMUSG00000026193	Fn1	protein_coding	7270	cds	GAG	NA	2360	-1	chr1	71586218	71586216	-	694	44.1099	68.74	35.3379	34.5243	26.5939	22.1221	83.2404	148.188	3	3	TRUE	0	FALSE	FALSE
ENSMUST00000190780	ENSMUSG00000026193	Fn1	protein_coding	121	5utr	NA	NA	-70	-6885	chr1	71653052	71653050	-	954	97.322	89.2947	117.774	50.5631	31.3717	62.6261	144.561	304.391	3	3	FALSE	0	FALSE	FALSE
ENSMUST00000190780	ENSMUSG00000026193	Fn1	protein_coding	472	cds	GAA	GAG	94	-2177	chr1	71650698	71650696	-	945	22.8903	25.3796	24.4351	27.8736	10.9778	16.9633	55.8147	72.7051	3	3	FALSE	0	FALSE	FALSE
ENSMUST00000190780	ENSMUSG00000026193	Fn1	protein_coding	1474	cds	CGG	AAT	428	-1843	chr1	71641261	71641259	-	916	20.621	13.2624	28.1135	18.8645	26.6866	22.0807	67.6318	61.997	3	3	FALSE	0	FALSE	FALSE
ENSMUST00000190780	ENSMUSG00000026193	Fn1	protein_coding	1768	cds	GTG	AAC	526	-1745	chr1	71638554	71638552	-	903	10.8274	10.4526	17.5298	11.7733	14.2366	23.2698	49.2796	38.8099	3	3	FALSE	0	FALSE	FALSE
ENSMUST00000190780	ENSMUSG00000026193	Fn1	protein_coding	2677	cds	TGG	AGT	829	-1442	chr1	71628085	71628083	-	873	27.1262	25.7436	35.3662	22.1966	12.6517	26.214	61.0623	88.236	3	3	FALSE	0	FALSE	FALSE
ENSMUST00000190780	ENSMUSG00000026193	Fn1	protein_coding	2710	cds	AGA	ATT	840	-1431	chr1	71627353	71627351	-	872	20.9054	15.4563	37.0272	17.1055	15.3676	16.6256	49.0988	73.389	3	3	FALSE	0	FALSE	FALSE
ENSMUST00000190780	ENSMUSG00000026193	Fn1	protein_coding	2974	cds	CCT	GAT	928	-1343	chr1	71626173	71626171	-	866	50.5753	73.9817	72.2542	70.917	84.561	80.1432	235.621	196.811	3	3	FALSE	0	FALSE	FALSE
ENSMUST00000190780	ENSMUSG00000026193	Fn1	protein_coding	3028	cds	GGG	GAA	946	-1325	chr1	71626119	71626117	-	865	40.8931	44.5541	65.9702	54.0667	79.6585	80.3401	214.065	151.417	3	3	FALSE	0	FALSE	FALSE
ENSMUST00000190780	ENSMUSG00000026193	Fn1	protein_coding	3361	cds	GGG	TCT	1057	-1214	chr1	71624157	71624155	-	852	22.1339	25.2465	25.8145	19.0313	11.529	20.5061	51.0665	73.1949	3	3	FALSE	0	FALSE	FALSE
ENSMUST00000190780	ENSMUSG00000026193	Fn1	protein_coding	3625	cds	GTG	GAA	1145	-1126	chr1	71619463	71619461	-	845	35.4183	29.7564	38.1306	30.0964	26.8527	53.4879	110.437	103.305	3	3	FALSE	0	FALSE	FALSE
ENSMUST00000190780	ENSMUSG00000026193	Fn1	protein_coding	3742	cds	CCT	GAC	1184	-1087	chr1	71618628	71618626	-	840	21.8094	23.0787	21.4812	21.4286	19.7121	28.1104	69.2511	66.3692	3	3	FALSE	0	FALSE	FALSE
ENSMUST00000190780	ENSMUSG00000026193	Fn1	protein_coding	4024	cds	CCA	GAC	1278	-993	chr1	71612610	71612608	-	825	27.5333	52.6568	14.3196	28.2592	41.293	35.8583	105.41	94.5097	3	3	FALSE	0	FALSE	FALSE
ENSMUST00000190780	ENSMUSG00000026193	Fn1	protein_coding	4279	cds	GAT	TCT	1363	-908	chr1	71609660	71609658	-	818	14.5951	13.9602	16.4678	12.6472	11.8046	27.5917	52.0436	45.023	3	3	FALSE	0	FALSE	FALSE
ENSMUST00000190780	ENSMUSG00000026193	Fn1	protein_coding	4528	cds	TCT	GAT	1446	-825	chr1	71608019	71608017	-	808	24.857	25.9123	35.1638	37.2163	26.411	47.4708	111.098	85.933	3	3	FALSE	0	FALSE	FALSE
ENSMUST00000190780	ENSMUSG00000026193	Fn1	protein_coding	4759	cds	GGG	GAC	1523	-748	chr1	71606752	71606750	-	799	19.6426	18.4875	20.4178	24.9429	28.0708	22.6277	75.6414	58.5478	3	3	FALSE	0	FALSE	FALSE
ENSMUST00000190780	ENSMUSG00000026193	Fn1	protein_coding	5140	cds	TGG	ATA	1650	-621	chr1	71602436	71602434	-	776	21.8424	21.2545	26.7741	17.4005	10.3688	19.7301	47.4994	69.871	3	3	FALSE	0	FALSE	FALSE
ENSMUST00000190780	ENSMUSG00000026193	Fn1	protein_coding	5365	cds	CCA	AGA	1725	-546	chr1	71600456	71600454	-	767	19.8646	22.0507	25.5921	12.4206	13.8974	23.4106	49.7286	67.5075	3	3	FALSE	0	FALSE	FALSE
ENSMUST00000190780	ENSMUSG00000026193	Fn1	protein_coding	5536	cds	CAG	CCA	1782	-489	chr1	71599688	71599686	-	756	69.2037	44.3162	97.0911	30.8979	15.1365	40.2852	86.3196	210.611	3	3	FALSE	0	FALSE	FALSE
ENSMUST00000190780	ENSMUSG00000026193	Fn1	protein_coding	6115	cds	GGA	GAC	1975	-296	chr1	71597449	71597447	-	733	22.1097	24.9289	20.8241	21.4525	23.5	23.9502	68.9026	67.8627	3	3	FALSE	0	FALSE	FALSE
ENSMUST00000190780	ENSMUSG00000026193	Fn1	protein_coding	6151	cds	GGC	CTC	1987	-284	chr1	71597413	71597411	-	732	49.051	54.5968	40.9796	46.1531	10.302	17.9525	74.4076	144.627	3	3	FALSE	0	FALSE	FALSE
ENSMUST00000190780	ENSMUSG00000026193	Fn1	protein_coding	6274	cds	CCC	TTA	2028	-243	chr1	71597290	71597288	-	727	23.7792	24.2151	22.3868	15.5406	10.9778	19.5221	46.0405	70.3811	3	3	FALSE	0	FALSE	FALSE
ENSMUST00000190780	ENSMUSG00000026193	Fn1	protein_coding	6604	cds	GGT	GTC	2138	-133	chr1	71590876	71590874	-	711	20.1672	24.3144	26.8874	18.8645	15.6629	16.7665	51.2939	71.369	3	3	FALSE	0	FALSE	FALSE
ENSMUST00000190780	ENSMUSG00000026193	Fn1	protein_coding	6712	cds	CAT	GAA	2174	-97	chr1	71590204	71590767	-	707	79.9244	95.0204	111.644	88.9352	48.734	72.4672	210.136	286.588	3	3	FALSE	0	FALSE	FALSE
ENSMUST00000190780	ENSMUSG00000026193	Fn1	protein_coding	7000	cds	GAG	NA	2270	-1	chr1	71586218	71586216	-	694	44.5119	69.5003	34.1719	33.0335	25.3996	22.763	81.1961	148.184	3	3	TRUE	0	FALSE	FALSE
ENSMUST00000055226	ENSMUSG00000026193	Fn1	protein_coding	124	5utr	NA	NA	-70	-7503	chr1	71653052	71653050	-	954	98.1443	93.8847	112.711	49.5195	31.2007	64.8407	145.561	304.74	3	3	FALSE	0	FALSE	FALSE
ENSMUST00000055226	ENSMUSG00000026193	Fn1	protein_coding	1477	cds	CGG	AAT	428	-2049	chr1	71641261	71641259	-	916	22.7506	15.1953	27.5883	15.4909	26.7792	22.6929	64.963	65.5342	3	3	FALSE	0	FALSE	FALSE
ENSMUST00000055226	ENSMUSG00000026193	Fn1	protein_coding	1771	cds	GTG	AAC	526	-1951	chr1	71638554	71638552	-	903	10.9603	10.4408	19.1739	11.049	13.666	22.3723	47.0873	40.575	3	3	FALSE	0	FALSE	FALSE
ENSMUST00000055226	ENSMUSG00000026193	Fn1	protein_coding	2155	cds	AAG	GAA	654	-1823	chr1	71629823	71629821	-	889	20.0034	20.2893	27.5433	13.7706	10.4749	17.1783	41.4237	67.8361	3	3	FALSE	0	FALSE	FALSE
ENSMUST00000055226	ENSMUSG00000026193	Fn1	protein_coding	2680	cds	TGG	AGT	829	-1648	chr1	71628085	71628083	-	873	27.6344	26.777	38.6085	26.0616	12.0294	31.2019	69.2929	93.0198	3	3	FALSE	0	FALSE	FALSE
ENSMUST00000055226	ENSMUSG00000026193	Fn1	protein_coding	2713	cds	AGA	ATT	840	-1637	chr1	71627353	71627351	-	872	20.6107	14.9395	35.7491	19.8921	13.5293	20.0869	53.5083	71.2993	3	3	FALSE	0	FALSE	FALSE
ENSMUST00000055226	ENSMUSG00000026193	Fn1	protein_coding	2977	cds	CCT	GAT	928	-1549	chr1	71626173	71626171	-	866	53.7322	76.5918	74.2085	72.9875	80.6662	77.2488	230.903	204.533	3	3	FALSE	0	FALSE	FALSE
ENSMUST00000055226	ENSMUSG00000026193	Fn1	protein_coding	3031	cds	GGG	GAA	946	-1531	chr1	71626119	71626117	-	865	39.0808	45.8936	64.9679	54.5484	89.7856	77.2488	221.583	149.942	3	3	FALSE	0	FALSE	FALSE
ENSMUST00000055226	ENSMUSG00000026193	Fn1	protein_coding	3364	cds	GGG	TCT	1057	-1420	chr1	71624157	71624155	-	852	23.5137	24.5791	24.7711	18.8435	13.791	21.3143	53.9487	72.8638	3	3	FALSE	0	FALSE	FALSE
ENSMUST00000055226	ENSMUSG00000026193	Fn1	protein_coding	3628	cds	GTG	GAA	1145	-1332	chr1	71619463	71619461	-	845	38.2416	29.8163	39.9126	29.6225	24.011	48.8811	102.515	107.971	3	3	FALSE	0	FALSE	FALSE
ENSMUST00000055226	ENSMUSG00000026193	Fn1	protein_coding	3745	cds	CCT	GAC	1184	-1293	chr1	71618628	71618626	-	840	24.7127	20.5641	22.6887	20.8815	19.6768	27.366	67.9243	67.9655	3	3	FALSE	0	FALSE	FALSE
ENSMUST00000055226	ENSMUSG00000026193	Fn1	protein_coding	3808	cds	AGA	ATA	1205	-1272	chr1	71615538	71615536	-	837	27.4818	33.1585	27.2353	19.1787	10.7879	23.0868	53.0534	87.8755	3	3	FALSE	0	FALSE	FALSE
ENSMUST00000055226	ENSMUSG00000026193	Fn1	protein_coding	4300	cds	CCA	GAC	1369	-1108	chr1	71612610	71612608	-	825	27.4773	54.4922	16.1465	29.6639	37.155	33.1314	99.9503	98.1159	3	3	FALSE	0	FALSE	FALSE
ENSMUST00000055226	ENSMUSG00000026193	Fn1	protein_coding	4453	cds	GGG	ACA	1420	-1057	chr1	71611008	71611006	-	823	15.7797	16.754	15.1025	12.5831	10.3296	11.5796	34.4922	47.6362	3	3	FALSE	0	FALSE	FALSE
ENSMUST00000055226	ENSMUSG00000026193	Fn1	protein_coding	4555	cds	GAT	TCT	1454	-1023	chr1	71609660	71609658	-	818	14.2719	13.1978	16.9853	13.9652	13.2383	30.571	57.7745	44.455	3	3	FALSE	0	FALSE	FALSE
ENSMUST00000055226	ENSMUSG00000026193	Fn1	protein_coding	4804	cds	TCT	GAT	1537	-940	chr1	71608019	71608017	-	808	28.5501	23.5066	38.4781	36.7171	25.9501	51.0541	113.721	90.5348	3	3	FALSE	0	FALSE	FALSE
ENSMUST00000055226	ENSMUSG00000026193	Fn1	protein_coding	5035	cds	GGG	GAC	1614	-863	chr1	71606752	71606750	-	799	18.8508	19.9759	20.8055	24.9566	26.8083	25.2818	77.0467	59.6321	3	3	FALSE	0	FALSE	FALSE
ENSMUST00000055226	ENSMUSG00000026193	Fn1	protein_coding	5911	cds	CCA	AGA	1906	-571	chr1	71600456	71600454	-	767	21.377	20.9596	27.1295	15.2087	13.7101	20.4656	49.3844	69.4661	3	3	FALSE	0	FALSE	FALSE
ENSMUST00000055226	ENSMUSG00000026193	Fn1	protein_coding	6082	cds	CAG	CCA	1963	-514	chr1	71599688	71599686	-	756	65.6528	42.1139	96.7672	32.8799	14.8553	40.9683	88.7035	204.534	3	3	FALSE	0	FALSE	FALSE
ENSMUST00000055226	ENSMUSG00000026193	Fn1	protein_coding	6484	cds	CCA	GAG	2097	-380	chr1	71597701	71597699	-	744	21.2244	27.6623	17.2246	22.3637	14.0673	14.6179	51.0489	66.1112	3	3	FALSE	0	FALSE	FALSE
ENSMUST00000055226	ENSMUSG00000026193	Fn1	protein_coding	6736	cds	GGA	GAC	2181	-296	chr1	71597449	71597447	-	733	22.1097	24.9289	20.8241	21.4525	23.5	23.9502	68.9026	67.8627	3	3	FALSE	0	FALSE	FALSE
ENSMUST00000055226	ENSMUSG00000026193	Fn1	protein_coding	6772	cds	GGC	CTC	2193	-284	chr1	71597413	71597411	-	732	49.051	54.5968	40.9796	46.1531	10.302	17.9525	74.4076	144.627	3	3	FALSE	0	FALSE	FALSE
ENSMUST00000055226	ENSMUSG00000026193	Fn1	protein_coding	6895	cds	CCC	TTA	2234	-243	chr1	71597290	71597288	-	727	21.9186	22.9421	24.0431	13.9312	14.3437	17.7068	45.9817	68.9038	3	3	FALSE	0	FALSE	FALSE
ENSMUST00000055226	ENSMUSG00000026193	Fn1	protein_coding	6997	cds	AGG	AGG	2268	-209	chr1	71595710	71595708	-	722	13.8987	11.1737	12.1422	15.9938	17.9362	23.0868	57.0168	37.2146	3	3	FALSE	0	FALSE	FALSE
ENSMUST00000055226	ENSMUSG00000026193	Fn1	protein_coding	7087	cds	CCT	TAC	2298	-179	chr1	71593192	71593190	-	719	20.9047	10.8421	27.8152	18.0386	11.707	25.6005	55.346	59.562	3	3	FALSE	0	FALSE	FALSE
ENSMUST00000055226	ENSMUSG00000026193	Fn1	protein_coding	7225	cds	GGT	GTC	2344	-133	chr1	71590876	71590874	-	711	22.7506	21.7639	27.6973	17.5024	19.0415	14.6179	51.1619	72.2118	3	3	FALSE	0	FALSE	FALSE
ENSMUST00000055226	ENSMUSG00000026193	Fn1	protein_coding	7333	cds	CAT	GAA	2380	-97	chr1	71590204	71590767	-	707	78.9143	96.5658	114.713	86.0626	50.8211	73.5067	210.39	290.193	3	3	FALSE	0	FALSE	FALSE
ENSMUST00000055226	ENSMUSG00000026193	Fn1	protein_coding	7621	cds	GAG	NA	2476	-1	chr1	71586218	71586216	-	694	45.1665	62.674	35.4848	33.661	26.1002	23.6357	83.3968	143.325	3	3	TRUE	0	FALSE	FALSE
ENSMUST00000186129	ENSMUSG00000026193	Fn1	protein_coding	149	5utr	NA	NA	-70	-6960	chr1	71653052	71653050	-	954	95.4394	89.0795	111.254	49.0247	28.8956	67.6945	145.615	295.773	3	3	FALSE	0	FALSE	FALSE
ENSMUST00000186129	ENSMUSG00000026193	Fn1	protein_coding	500	cds	GAA	GAG	94	-2202	chr1	71650698	71650696	-	945	23.0697	25.0305	24.4565	25.5152	13.185	17.7331	56.4333	72.5567	3	3	FALSE	0	FALSE	FALSE
ENSMUST00000186129	ENSMUSG00000026193	Fn1	protein_coding	545	cds	GGT	GAC	109	-2187	chr1	71650653	71650651	-	944	11.5755	15.3171	13.6201	11.8756	12.7674	17.2628	41.9057	40.5126	3	3	FALSE	0	FALSE	FALSE
ENSMUST00000186129	ENSMUSG00000026193	Fn1	protein_coding	1502	cds	CGG	AAT	428	-1868	chr1	71641261	71641259	-	916	19.7388	11.3437	26.9101	18.5124	29.1712	23.634	71.3176	57.9927	3	3	FALSE	0	FALSE	FALSE
ENSMUST00000186129	ENSMUSG00000026193	Fn1	protein_coding	1796	cds	GTG	AAC	526	-1770	chr1	71638554	71638552	-	903	12.1919	10.1919	17.5598	11.6638	14.1307	23.6714	49.4658	39.9436	3	3	FALSE	0	FALSE	FALSE
ENSMUST00000186129	ENSMUSG00000026193	Fn1	protein_coding	2705	cds	TGG	AGT	829	-1467	chr1	71628085	71628083	-	873	28.2173	25.8162	37.5428	22.355	12.3022	29.3056	63.9628	91.5763	3	3	FALSE	0	FALSE	FALSE
ENSMUST00000186129	ENSMUSG00000026193	Fn1	protein_coding	2738	cds	AGA	ATT	840	-1456	chr1	71627353	71627351	-	872	23.2698	16.7684	36.3717	17.8115	12.5552	17.845	48.2117	76.4099	3	3	FALSE	0	FALSE	FALSE
ENSMUST00000186129	ENSMUSG00000026193	Fn1	protein_coding	3002	cds	CCT	GAT	928	-1368	chr1	71626173	71626171	-	866	53.0471	72.8679	73.3762	70.7002	80.1618	76.3492	227.211	199.291	3	3	FALSE	0	FALSE	FALSE
ENSMUST00000186129	ENSMUSG00000026193	Fn1	protein_coding	3056	cds	GGG	GAA	946	-1350	chr1	71626119	71626117	-	865	37.7556	46.5574	65.4018	52.5262	80.7129	74.9723	208.211	149.715	3	3	FALSE	0	FALSE	FALSE
ENSMUST00000186129	ENSMUSG00000026193	Fn1	protein_coding	3389	cds	GGG	TCT	1057	-1239	chr1	71624157	71624155	-	852	22.1613	23.3031	24.6098	16.6783	10.1531	20.4869	47.3183	70.0742	3	3	FALSE	0	FALSE	FALSE
ENSMUST00000186129	ENSMUSG00000026193	Fn1	protein_coding	3653	cds	GTG	GAA	1145	-1151	chr1	71619463	71619461	-	845	39.6644	29.4885	40.9037	29.3771	27.4065	50.6948	107.478	110.057	3	3	FALSE	0	FALSE	FALSE
ENSMUST00000186129	ENSMUSG00000026193	Fn1	protein_coding	3770	cds	CCT	GAC	1184	-1112	chr1	71618628	71618626	-	840	21.3863	22.9383	22.2503	21.3712	22.3021	29.7765	73.4499	66.5749	3	3	FALSE	0	FALSE	FALSE
ENSMUST00000186129	ENSMUSG00000026193	Fn1	protein_coding	4052	cds	CCA	GAC	1278	-1018	chr1	71612610	71612608	-	825	29.6333	52.4508	16.9422	31.4325	36.8887	33.0755	101.397	99.0263	3	3	FALSE	0	FALSE	FALSE
ENSMUST00000186129	ENSMUSG00000026193	Fn1	protein_coding	4307	cds	GAT	TCT	1363	-933	chr1	71609660	71609658	-	818	13.3224	13.0231	16.6185	13.3425	12.9094	30.3218	56.5736	42.964	3	3	FALSE	0	FALSE	FALSE
ENSMUST00000186129	ENSMUSG00000026193	Fn1	protein_coding	4556	cds	TCT	GAT	1446	-850	chr1	71608019	71608017	-	808	25.9463	25.5621	37.4915	40.1878	24.21	48.0246	112.422	88.9999	3	3	FALSE	0	FALSE	FALSE
ENSMUST00000186129	ENSMUSG00000026193	Fn1	protein_coding	4787	cds	GGG	GAC	1523	-773	chr1	71606752	71606750	-	799	20.5841	20.8129	20.9294	27.6765	25.3515	23.8249	76.8529	62.3263	3	3	FALSE	0	FALSE	FALSE
ENSMUST00000186129	ENSMUSG00000026193	Fn1	protein_coding	5240	cds	AAA	GAA	1674	-622	chr1	71602364	71602362	-	773	12.2072	11.7259	11.2974	16.048	10.6009	13.9895	40.6384	35.2305	3	3	FALSE	0	FALSE	FALSE
ENSMUST00000186129	ENSMUSG00000026193	Fn1	protein_coding	5393	cds	CCA	AGA	1725	-571	chr1	71600456	71600454	-	767	20.7986	21.7085	26.1933	13.6547	15.4563	20.7038	49.8147	68.7005	3	3	FALSE	0	FALSE	FALSE
ENSMUST00000186129	ENSMUSG00000026193	Fn1	protein_coding	5564	cds	CAG	CCA	1782	-514	chr1	71599688	71599686	-	756	59.1723	47.4143	97.2933	31.0311	16.6593	41.0612	88.7515	203.88	3	3	FALSE	0	FALSE	FALSE
ENSMUST00000186129	ENSMUSG00000026193	Fn1	protein_coding	5966	cds	CCA	GAG	1916	-380	chr1	71597701	71597699	-	744	20.9501	27.2895	17.0955	22.1805	14.0119	14.5859	50.7783	65.3351	3	3	FALSE	0	FALSE	FALSE
ENSMUST00000186129	ENSMUSG00000026193	Fn1	protein_coding	6218	cds	GGA	GAC	2000	-296	chr1	71597449	71597447	-	733	22.1097	24.9289	20.8241	21.4525	23.5	23.9502	68.9026	67.8627	3	3	FALSE	0	FALSE	FALSE
ENSMUST00000186129	ENSMUSG00000026193	Fn1	protein_coding	6254	cds	GGC	CTC	2012	-284	chr1	71597413	71597411	-	732	49.051	54.5968	40.9796	46.1531	10.302	17.9525	74.4076	144.627	3	3	FALSE	0	FALSE	FALSE
ENSMUST00000186129	ENSMUSG00000026193	Fn1	protein_coding	6377	cds	CCC	TTA	2053	-243	chr1	71597290	71597288	-	727	24.5398	21.2452	24.629	17.0981	13.185	19.1146	49.3978	70.414	3	3	FALSE	0	FALSE	FALSE
ENSMUST00000186129	ENSMUSG00000026193	Fn1	protein_coding	6569	cds	CCT	TAC	2117	-179	chr1	71593192	71593190	-	719	19.3631	10.5294	27.7965	17.0536	11.3352	28.8897	57.2785	57.689	3	3	FALSE	0	FALSE	FALSE
ENSMUST00000186129	ENSMUSG00000026193	Fn1	protein_coding	6707	cds	GGT	GTC	2163	-133	chr1	71590876	71590874	-	711	19.1332	20.7783	26.4501	18.8458	18.1462	16.5529	53.545	66.3616	3	3	FALSE	0	FALSE	FALSE
ENSMUST00000186129	ENSMUSG00000026193	Fn1	protein_coding	6815	cds	CAT	GAA	2199	-97	chr1	71590204	71590767	-	707	78.4825	92.2687	105.887	86.8734	49.2918	74.3822	210.547	276.638	3	3	FALSE	0	FALSE	FALSE
ENSMUST00000186129	ENSMUSG00000026193	Fn1	protein_coding	7103	cds	GAG	NA	2295	-1	chr1	71586218	71586216	-	694	41.7198	67.2476	33.9675	32.1722	24.8768	22.2056	79.2547	142.935	3	3	TRUE	0	FALSE	FALSE
ENSMUST00000187627	ENSMUSG00000026193	Fn1	nonsense_mediated_decay	84	cds	CAG	CCA	28	-172	chr1	71599688	71599686	-	756	62.9942	43.0686	97.4668	31.1857	18.1135	39.5935	88.8927	203.53	3	3	FALSE	0	FALSE	FALSE
ENSMUST00000187627	ENSMUSG00000026193	Fn1	nonsense_mediated_decay	390	cds	CTG	AAG	130	-70	chr1	71598423	71598421	-	748	11.8698	10.1838	16.8421	11.6728	10.3172	12.327	34.317	38.8957	3	3	FALSE	0	FALSE	FALSE
ENSMUST00000187627	ENSMUSG00000026193	Fn1	nonsense_mediated_decay	486	cds	CCA	GAG	162	-38	chr1	71597701	71597699	-	744	24.3333	31.1492	20.0355	26.8699	16.8202	18.7412	62.4312	75.518	3	3	FALSE	0	FALSE	FALSE
ENSMUST00000187627	ENSMUSG00000026193	Fn1	nonsense_mediated_decay	1082	3utr	NA	NA	1081	479	chr1	71590204	71590767	-	707	56.0751	77.2278	79.5555	69.4265	23.6985	60.7375	153.862	212.858	3	3	FALSE	0	FALSE	FALSE
ENSMUST00000186940	ENSMUSG00000026193	Fn1	protein_coding	110	5utr	NA	NA	-70	-1221	chr1	71653052	71653050	-	954	120.544	104.449	139.652	52.8311	38.3151	80.7801	171.926	364.645	3	3	FALSE	0	FALSE	FALSE
ENSMUST00000186940	ENSMUSG00000026193	Fn1	protein_coding	461	cds	GAA	GAG	94	-289	chr1	71650698	71650696	-	945	27.1404	30.8426	24.6054	26.8242	14.9109	18.1408	59.8759	82.5884	3	3	FALSE	0	FALSE	FALSE
ENSMUST00000186940	ENSMUSG00000026193	Fn1	protein_coding	506	cds	GGT	GAC	109	-274	chr1	71650653	71650651	-	944	13.7634	16.3213	11.0695	14.3809	11.9751	14.4592	40.8152	41.1542	3	3	FALSE	0	FALSE	FALSE
ENSMUST00000186736	ENSMUSG00000026193	Fn1	protein_coding	121	5utr	NA	NA	-70	-550	chr1	71653052	71653050	-	954	127.506	110.987	154.043	65.9934	41.6998	90.7702	198.463	392.537	3	3	FALSE	0	FALSE	FALSE
ENSMUST00000186736	ENSMUSG00000026193	Fn1	protein_coding	190	cds	ATG	CTC	0	-159	chr1	71652983	71652981	-	952	43.8651	59.6845	29.0818	25.832	11.0781	12.2691	49.1792	132.631	3	3	TRUE	0	FALSE	FALSE
ENSMUST00000186736	ENSMUSG00000026193	Fn1	protein_coding	310	cds	CAA	TCC	40	-119	chr1	71652863	71652861	-	951	12.5241	18.4191	15.7748	13.0627	19.6237	17.7278	50.4142	46.718	3	3	FALSE	0	FALSE	FALSE
ENSMUST00000102696	ENSMUSG00000047675	Rps8	protein_coding	182	cds	ATG	GGC	0	-208	chr4	117156062	117156060	-	23557	103.227	159.864	81.1395	162.84	169.789	152.455	485.085	344.231	3	3	TRUE	0	FALSE	TRUE
ENSMUST00000102696	ENSMUSG00000047675	Rps8	protein_coding	356	cds	AGA	TTG	58	-150	chr4	117155045	117155043	-	23549	45.101	24.9348	54.4833	49.0811	27.5288	60.8922	137.502	124.519	3	3	FALSE	0	FALSE	TRUE
ENSMUST00000102696	ENSMUSG00000047675	Rps8	protein_coding	491	cds	ATT	GAC	103	-105	chr4	117154716	117154714	-	23548	15.4789	10.4849	13.6483	18.0743	17.1507	29.2178	64.4428	39.6122	3	3	FALSE	0	FALSE	TRUE
ENSMUST00000102696	ENSMUSG00000047675	Rps8	protein_coding	734	cds	GCA	GAC	184	-24	chr4	117153953	117153951	-	23544	42.5507	33.9896	52.8492	52.7456	39.3333	66.5077	158.587	129.39	3	3	FALSE	0	FALSE	TRUE
ENSMUST00000102696	ENSMUSG00000047675	Rps8	protein_coding	803	cds	AAA	NA	207	-1	chr4	117153884	117153882	-	23538	24.2502	49.1692	22.3719	42.4334	29.7174	23.6346	95.7854	95.7913	3	3	TRUE	0	FALSE	TRUE
ENSMUST00000029773	ENSMUSG00000053931	Cnn3	protein_coding	275	cds	ATG	ACC	0	-330	chr3	121426815	121426817	+	22240	55.543	65.6099	67.0087	44.8007	30.9155	22.8709	98.5872	188.162	3	3	TRUE	0	FALSE	TRUE
ENSMUST00000029773	ENSMUSG00000053931	Cnn3	protein_coding	782	cds	ACC	AAC	169	-161	chr3	121454996	121454998	+	22249	14.631	11.1197	24.9123	13.2304	18.2022	21.8126	53.2451	50.6631	3	3	FALSE	0	FALSE	TRUE
ENSMUST00000029773	ENSMUSG00000053931	Cnn3	protein_coding	1103	cds	ACA	GAA	276	-54	chr3	121457305	121457307	+	22258	12.7589	12.5771	12.548	15.0689	10.7716	16.9023	42.7428	37.8839	3	3	FALSE	0	FALSE	TRUE
ENSMUST00000029773	ENSMUSG00000053931	Cnn3	protein_coding	1190	cds	GAT	GAA	305	-25	chr3	121457392	121457394	+	22260	14.8338	13.5781	21.9513	27.7887	12.4482	18.6273	58.8642	50.3631	3	3	FALSE	0	FALSE	TRUE
ENSMUST00000162733	ENSMUSG00000009687	Fxyd5	protein_coding	29	cds	ATG	TCA	0	-185	chr7	31041457	31042090	-	29418	29.071	27.7153	36.5337	28.9872	13.4597	10.7199	53.1668	93.32	3	3	TRUE	0	FALSE	FALSE
ENSMUST00000160689	ENSMUSG00000009687	Fxyd5	protein_coding	24	cds	ATG	TCA	0	-116	chr7	31041457	31042090	-	29418	33.0808	31.746	40.534	36.3065	16.1884	12.8458	65.3406	105.361	3	3	TRUE	0	FALSE	FALSE
ENSMUST00000080537	ENSMUSG00000001847	Rac1	protein_coding	239	cds	ATG	CAG	0	-192	chr5	143527798	143527796	-	26611	24.3385	30.9237	14.4023	15.9545	13.3313	12.2467	41.5325	69.6645	3	3	TRUE	0	FALSE	FALSE
ENSMUST00000080537	ENSMUSG00000001847	Rac1	protein_coding	326	cds	GGA	GAG	29	-163	chr5	143517178	143517176	-	26610	15.6064	13.9262	18.3861	23.5529	12.0167	21.7101	57.2797	47.9187	3	3	FALSE	0	FALSE	FALSE
ENSMUST00000100489	ENSMUSG00000001847	Rac1	protein_coding	196	cds	ATG	CAG	0	-211	chr5	143527798	143527796	-	26611	26.82	33.9982	16.1487	17.7702	14.4547	13.5595	45.7844	76.9669	3	3	TRUE	0	FALSE	FALSE
ENSMUST00000100489	ENSMUSG00000001847	Rac1	protein_coding	283	cds	GGA	GAG	29	-182	chr5	143517178	143517176	-	26610	15.6064	13.9262	18.3861	23.5529	12.0167	21.7101	57.2797	47.9187	3	3	FALSE	0	FALSE	FALSE
ENSMUST00000058119	ENSMUSG00000048040	Arxes2	protein_coding	135	cds	ATG	AAC	0	-180	chrX	135993958	135993960	+	36784	52.5858	52.3024	75.7122	48.8553	24.5406	42.0744	115.47	180.6	3	3	TRUE	0	FALSE	TRUE
ENSMUST00000057625	ENSMUSG00000048355	Arxes1	protein_coding	139	cds	ATG	AAC	0	-180	chrX	136033505	136033507	+	36786	52.5858	52.3024	75.7122	48.8553	24.5406	42.0744	115.47	180.6	3	3	TRUE	0	FALSE	TRUE
ENSMUST00000020579	ENSMUSG00000020330	Hmmr	protein_coding	63	cds	ATG	TCC	0	-794	chr11	40733360	40733358	-	4852	20.2421	28.3772	13.4809	23.2009	11.221	25.0941	59.516	62.1003	3	3	TRUE	0	FALSE	TRUE
ENSMUST00000026328	ENSMUSG00000025289	Prdx4	protein_coding	924	cds	AAC	NA	273	-1	chrX	155323984	155323982	-	36921	28.0203	55.7154	40.002	36.9894	30.5517	45.607	113.148	123.738	3	3	TRUE	0	FALSE	TRUE
ENSMUST00000045633	ENSMUSG00000040463	Mybbp1a	protein_coding	29	cds	ATG	GCG	0	-1344	chr11	72441383	72441385	+	5719	19.2802	14.4902	18.0785	23.1496	21.2954	20.0836	64.5287	51.8489	3	3	TRUE	0	FALSE	TRUE
ENSMUST00000045633	ENSMUSG00000040463	Mybbp1a	protein_coding	3542	cds	AAA	AAG	1171	-173	chr11	72450952	72450954	+	5738	16.7091	11.5539	19.6515	22.1625	17.3205	50.0104	89.4935	47.9145	3	3	FALSE	0	FALSE	TRUE
ENSMUST00000045633	ENSMUSG00000040463	Mybbp1a	protein_coding	4058	cds	CCT	NA	1343	-1	chr11	72451468	72451470	+	5740	25.2241	26.8381	24.457	33.3884	19.9333	28.2691	81.5908	76.5191	3	3	TRUE	0	FALSE	TRUE
ENSMUST00000031355	ENSMUSG00000029407	Uso1	protein_coding	3034	cds	ATC	NA	958	-1	chr5	92201931	92201933	+	25420	32.4353	37.7273	30.3928	50.6173	12.971	25.7472	89.3356	100.555	3	3	TRUE	0	FALSE	TRUE
ENSMUST00000023116	ENSMUSG00000022477	Aco2	protein_coding	204	cds	ATG	GCG	0	-780	chr15	81872512	81872514	+	12394	20.6798	28.4501	20.8471	27.7344	20.3771	12.4622	60.5738	69.9771	3	3	TRUE	0	FALSE	FALSE
ENSMUST00000135198	ENSMUSG00000022477	Aco2	protein_coding	29	cds	ATG	GCG	0	-58	chr15	81872512	81872514	+	12394	23.3619	27.8501	20.8471	26.9652	20.0921	12.4622	59.5195	72.0592	3	3	TRUE	0	FALSE	FALSE
ENSMUST00000157003	ENSMUSG00000022477	Aco2	protein_coding	29	cds	ATG	GCG	0	-77	chr15	81872512	81872514	+	12394	24.0866	31.5252	20.8471	31.5252	25.4561	12.4622	69.4435	76.459	3	3	TRUE	0	FALSE	FALSE
ENSMUST00000005371	ENSMUSG00000059552	Trp53	protein_coding	247	cds	CCA	GAA	27	-360	chr11	69587263	69587265	+	5487	30.7726	31.4656	33.1447	48.6444	24.2788	28.9598	101.883	95.3829	3	3	FALSE	0	FALSE	FALSE
ENSMUST00000005371	ENSMUSG00000059552	Trp53	protein_coding	814	cds	CCC	GAG	216	-171	chr11	69588732	69588734	+	5492	30.6413	40.4892	33.844	72.9786	48.3223	70.2593	191.56	104.974	3	3	FALSE	0	FALSE	FALSE
ENSMUST00000108657	ENSMUSG00000059552	Trp53	protein_coding	201	cds	CCA	GAA	27	-351	chr11	69587263	69587265	+	5487	30.7726	31.4656	33.1447	49.4135	24.2788	28.9598	102.652	95.3829	3	3	FALSE	0	FALSE	FALSE
ENSMUST00000108657	ENSMUSG00000059552	Trp53	protein_coding	768	cds	CCC	GAG	216	-162	chr11	69588732	69588734	+	5492	30.6413	41.3912	33.844	74.2625	48.7605	71.0559	194.079	105.877	3	3	FALSE	0	FALSE	FALSE
ENSMUST00000171247	ENSMUSG00000059552	Trp53	protein_coding	247	cds	CCA	GAA	30	-351	chr11	69587263	69587265	+	5487	30.7726	31.4656	33.1447	49.1778	24.2788	28.9598	102.416	95.3829	3	3	FALSE	0	FALSE	FALSE
ENSMUST00000171247	ENSMUSG00000059552	Trp53	protein_coding	814	cds	CCC	GAG	219	-162	chr11	69588732	69588734	+	5492	30.6413	41.0253	33.844	73.7468	48.3293	70.7455	192.822	105.511	3	3	FALSE	0	FALSE	FALSE
ENSMUST00000108658	ENSMUSG00000059552	Trp53	protein_coding	247	cds	CCA	GAA	30	-360	chr11	69587263	69587265	+	5487	30.7726	31.4656	33.1447	48.3169	24.2788	28.9598	101.555	95.3829	3	3	FALSE	0	FALSE	FALSE
ENSMUST00000108658	ENSMUSG00000059552	Trp53	protein_coding	814	cds	CCC	GAG	219	-171	chr11	69588732	69588734	+	5492	30.6413	40.1571	33.844	72.507	47.9142	69.9712	190.392	104.642	3	3	FALSE	0	FALSE	FALSE
ENSMUST00000023150	ENSMUSG00000022507	1810013L24Rik	protein_coding	84	5utr	NA	NA	-277	-1104	chr16	8830183	8830185	+	13077	15.8643	10.1938	23.1661	10.2277	10.0677	15.4647	35.7601	49.2242	3	3	FALSE	0	FALSE	TRUE
ENSMUST00000023150	ENSMUSG00000022507	1810013L24Rik	protein_coding	1182	cds	CTC	NA	274	-1	chr16	8856032	8856034	+	13082	12.2381	23.1224	14.2373	17.8095	20.3977	13.369	51.5763	49.5978	3	3	TRUE	0	FALSE	TRUE
ENSMUST00000144742	ENSMUSG00000029177	Cenpa	protein_coding	252	cds	ATG	GGC	0	-134	chr5	30672487	30672489	+	24740	12.7889	14.1842	20.5494	25.9527	13.7114	23.8372	63.5013	47.5225	3	3	TRUE	0	FALSE	TRUE
ENSMUST00000134846	ENSMUSG00000029177	Cenpa	nonsense_mediated_decay	117	cds	ATG	GGC	0	-39	chr5	30667028	30667030	+	24738	13.0002	18.6339	26.592	30.7087	18	28.4741	77.1828	58.2261	3	3	TRUE	0	FALSE	FALSE
ENSMUST00000031073	ENSMUSG00000029177	Cenpa	nonsense_mediated_decay	55	cds	ATG	GGC	0	-39	chr5	30667028	30667030	+	24738	13.6885	18.3848	26.3793	29.777	11.7851	28.1583	69.7205	58.4526	3	3	TRUE	0	FALSE	FALSE
ENSMUST00000004140	ENSMUSG00000058135	Gstm1	protein_coding	198	cds	ATG	CCT	0	-218	chr3	108017776	108017774	-	22123	17.2973	16.3512	19.4876	15.3077	16.0827	17.635	49.0254	53.1362	3	3	TRUE	0	FALSE	FALSE
ENSMUST00000004140	ENSMUSG00000058135	Gstm1	protein_coding	849	cds	AAG	NA	217	-1	chr3	108012695	108012693	-	22121	13.5696	25.5859	41.8115	39.5344	18.0919	44.1705	101.797	80.967	3	3	TRUE	0	FALSE	FALSE
ENSMUST00000153314	ENSMUSG00000058135	Gstm1	protein_coding	579	cds	AAG	NA	193	-1	chr3	108012695	108012693	-	22121	17.7221	29.3962	50.5733	48.1029	19.2097	53.6768	120.989	97.6917	3	3	TRUE	0	FALSE	FALSE
ENSMUST00000126593	ENSMUSG00000058135	Gstm1	protein_coding	31	cds	ATG	CCT	0	-244	chr3	108017776	108017774	-	22123	19.2616	17.7605	21.2132	16.3454	17.7177	19.4727	53.5357	58.2353	3	3	TRUE	0	FALSE	FALSE
ENSMUST00000051236	ENSMUSG00000049866	Arl4c	nonsense_mediated_decay	785	cds	CGG	NA	191	-1	chr1	88701092	88701090	-	1273	25.9527	24.8415	26.7013	21.988	13.6003	39.052	74.6403	77.4956	3	3	TRUE	0	FALSE	FALSE
ENSMUST00000159814	ENSMUSG00000049866	Arl4c	protein_coding	1130	cds	CGG	NA	191	-1	chr1	88701092	88701090	-	1273	25.9527	24.8415	26.7013	21.988	13.6003	39.052	74.6403	77.4956	3	3	TRUE	0	FALSE	FALSE
ENSMUST00000187810	ENSMUSG00000049866	Arl4c	protein_coding	785	cds	CGG	NA	191	-1	chr1	88701092	88701090	-	1273	25.9527	24.8415	26.7013	21.988	13.6003	39.052	74.6403	77.4956	3	3	TRUE	0	FALSE	FALSE
ENSMUST00000160013	ENSMUSG00000043004	Gng2	protein_coding	572	cds	CTT	NA	70	-1	chr14	19875813	19875811	-	10456	11.8	30.0002	12.6591	22.0304	15.815	24.1451	61.9906	54.4593	3	3	TRUE	0	FALSE	FALSE
ENSMUST00000055100	ENSMUSG00000043004	Gng2	protein_coding	414	cds	CTT	NA	70	-1	chr14	19875813	19875811	-	10456	10.4021	26.5749	11.553	24.1979	19.4512	21.7318	65.3809	48.53	3	3	TRUE	0	FALSE	FALSE
ENSMUST00000161247	ENSMUSG00000043004	Gng2	protein_coding	399	cds	CTT	NA	70	-1	chr14	19875813	19875811	-	10456	10.4021	31.7338	13.6649	25.4627	16.0278	15.7501	57.2405	55.8008	3	3	TRUE	0	FALSE	FALSE
ENSMUST00000022803	ENSMUSG00000022193	Psmb5	protein_coding	31	cds	ATG	GCG	0	-264	chr14	54617965	54617963	-	11000	27.6508	35.3835	21.7562	25.5845	20.5323	31.5882	77.705	84.7904	3	3	TRUE	0	FALSE	TRUE
ENSMUST00000022803	ENSMUSG00000022193	Psmb5	protein_coding	820	cds	CCC	NA	263	-1	chr14	54614171	54614169	-	10993	26.4066	49.0578	32.5648	67.0792	34.986	29.8523	131.917	108.029	3	3	TRUE	0	FALSE	TRUE
ENSMUST00000085984	ENSMUSG00000005378	Bud23	protein_coding	257	cds	ATG	GCA	0	-281	chr5	135064062	135064060	-	26073	13.1778	14.9599	18.9038	14.8388	24.513	11.9762	51.328	47.0415	3	3	TRUE	0	FALSE	FALSE
ENSMUST00000111205	ENSMUSG00000005378	Bud23	protein_coding	17	cds	ATG	GCA	0	-246	chr5	135064062	135064060	-	26073	13.1778	15.4891	18.9038	14.8596	24.513	12.1884	51.561	47.5707	3	3	TRUE	0	FALSE	FALSE
ENSMUST00000073456	ENSMUSG00000060739	Nsa2	protein_coding	957	cds	GTC	NA	259	-1	chr13	97131156	97131154	-	9998	35.6983	35.4804	34.5545	33.3871	17.1275	22.4069	72.9215	105.733	3	3	TRUE	0	FALSE	TRUE
ENSMUST00000166939	ENSMUSG00000002885	Adgre5	protein_coding	189	cds	ATG	AGG	0	-722	chr8	83741138	83741136	-	32227	22.1645	16.9635	24.6856	14.531	15.4138	18.3714	48.3162	63.8137	3	3	TRUE	0	FALSE	FALSE
ENSMUST00000002964	ENSMUSG00000002885	Adgre5	protein_coding	189	cds	ATG	AGG	0	-724	chr8	83741138	83741136	-	32227	22.1658	16.9731	24.6722	14.5175	15.4126	18.3557	48.2858	63.8111	3	3	TRUE	0	FALSE	FALSE
ENSMUST00000075843	ENSMUSG00000002885	Adgre5	protein_coding	32	cds	ATG	AGG	0	-818	chr8	83741138	83741136	-	32227	23.339	17.7821	25.9441	15.1276	16.127	19.3434	50.598	67.0652	3	3	TRUE	0	FALSE	FALSE
ENSMUST00000109802	ENSMUSG00000002885	Adgre5	protein_coding	36	cds	ATG	AGG	0	-773	chr8	83741138	83741136	-	32227	22.6934	17.3336	25.1831	14.7225	15.6982	18.9043	49.325	65.2101	3	3	TRUE	0	FALSE	FALSE
ENSMUST00000149368	ENSMUSG00000002885	Adgre5	nonsense_mediated_decay	46	cds	ATG	AGG	0	-47	chr8	83741138	83741136	-	32227	26.0134	23.094	31.3293	20.1623	20.5833	22.663	63.4086	80.4367	3	3	TRUE	0	FALSE	FALSE
ENSMUST00000030660	ENSMUSG00000028847	Trappc3	protein_coding	708	cds	GAG	NA	179	-1	chr4	126275255	126275257	+	23806	29.1765	21.0456	19.0258	27.0939	11.7226	35.3224	74.1389	69.2479	3	3	TRUE	0	FALSE	TRUE
ENSMUST00000118853	ENSMUSG00000027955	Gask1b	protein_coding	330	5utr	NA	NA	-68	-1621	chr3	79886159	79886161	+	21272	18.5813	14.5812	14.781	12.35	14.3103	12.2563	38.9166	47.9436	3	3	FALSE	0	FALSE	FALSE
ENSMUST00000118853	ENSMUSG00000027955	Gask1b	protein_coding	1945	cds	GAA	NA	516	-1	chr3	79941496	79941498	+	21284	41.8095	34.8352	44.7363	33.4668	26.5735	36.5148	96.5551	121.381	3	3	TRUE	0	FALSE	FALSE
ENSMUST00000029567	ENSMUSG00000027955	Gask1b	protein_coding	230	5utr	NA	NA	-68	-1621	chr3	79886159	79886161	+	21272	18.5813	14.5812	14.781	12.35	14.3103	12.2563	38.9166	47.9436	3	3	FALSE	0	FALSE	FALSE
ENSMUST00000029567	ENSMUSG00000027955	Gask1b	protein_coding	1845	cds	GAA	NA	516	-1	chr3	79941496	79941498	+	21284	41.8095	34.8352	44.7363	33.4668	26.5735	36.5148	96.5551	121.381	3	3	TRUE	0	FALSE	FALSE
ENSMUST00000060101	ENSMUSG00000051579	Tceal8	protein_coding	193	5utr	NA	NA	-116	-469	chrX	136172150	136172148	-	36792	27.924	25.8402	42.5912	18.1688	11.6752	47.2929	77.1369	96.3554	3	3	FALSE	0	FALSE	FALSE
ENSMUST00000060101	ENSMUSG00000051579	Tceal8	protein_coding	389	cds	CCA	CAG	27	-90	chrX	136170942	136170940	-	36790	19.3524	18.6825	31.7077	20.1524	11.0227	30.3073	61.4824	69.7426	3	3	FALSE	0	FALSE	FALSE
ENSMUST00000146583	ENSMUSG00000051579	Tceal8	protein_coding	67	5utr	NA	NA	-218	-355	chrX	136172150	136172148	-	36792	25.1226	24.5636	36.0373	17.592	10.384	38.7836	66.7596	85.7235	3	3	FALSE	0	FALSE	FALSE
ENSMUST00000146583	ENSMUSG00000051579	Tceal8	protein_coding	365	cds	CCA	CAG	27	-18	chrX	136170942	136170940	-	36790	19.3524	18.6825	31.7077	20.1524	11.0227	30.0743	61.2494	69.7426	3	3	FALSE	0	FALSE	FALSE
ENSMUST00000136533	ENSMUSG00000051579	Tceal8	protein_coding	52	5utr	NA	NA	-332	-365	chrX	136172150	136172148	-	36792	26.9215	28.6192	36.6936	20.078	10.8321	39.9921	70.9023	92.2343	3	3	FALSE	0	FALSE	FALSE
ENSMUST00000163584	ENSMUSG00000051579	Tceal8	protein_coding	102	5utr	NA	NA	-218	-571	chrX	136172150	136172148	-	36792	27.924	25.8402	42.5912	18.1688	11.6752	47.2929	77.1369	96.3554	3	3	FALSE	0	FALSE	FALSE
ENSMUST00000163584	ENSMUSG00000051579	Tceal8	protein_coding	400	cds	CCA	CAG	27	-90	chrX	136170942	136170940	-	36790	19.3524	18.6825	31.7077	20.1524	11.0227	30.3073	61.4824	69.7426	3	3	FALSE	0	FALSE	FALSE
ENSMUST00000002790	ENSMUSG00000002718	Cse1l	protein_coding	3039	cds	TTG	NA	970	-1	chr2	166945787	166945789	+	20578	15.925	14.0582	14.8474	14.8015	10.2472	12.8583	37.907	44.8306	3	3	TRUE	0	FALSE	FALSE
ENSMUST00000169290	ENSMUSG00000002718	Cse1l	nonsense_mediated_decay	2140	3utr	NA	NA	2062	815	chr2	166941313	166941315	+	20572	11.2618	26.665	11.9332	15.9223	16.4083	14.4075	46.738	49.86	3	3	FALSE	0	FALSE	FALSE
ENSMUST00000163437	ENSMUSG00000002718	Cse1l	protein_coding	1971	cds	TTG	NA	657	-1	chr2	166945787	166945789	+	20578	15.925	14.0582	14.8474	14.8015	10.2472	12.8583	37.907	44.8306	3	3	TRUE	0	FALSE	FALSE
ENSMUST00000168166	ENSMUSG00000007656	Arpp19	protein_coding	116	cds	ATG	TCC	0	-112	chr9	75037916	75037918	+	34435	31.7266	35.8888	37.9122	29.5638	20.8226	22.4179	72.8043	105.528	3	3	TRUE	0	FALSE	FALSE
ENSMUST00000168166	ENSMUSG00000007656	Arpp19	protein_coding	449	cds	GGC	NA	111	-1	chr9	75056799	75056801	+	34438	37.2875	38.3356	44.4641	48.1694	13.2299	38.4742	99.8735	120.087	3	3	TRUE	0	FALSE	FALSE
ENSMUST00000170308	ENSMUSG00000007656	Arpp19	protein_coding	57	cds	ATG	TCC	0	-112	chr9	75037916	75037918	+	34435	38.5903	33.7552	43.8172	36.6277	20.5709	21.9849	79.1835	116.163	3	3	TRUE	0	FALSE	FALSE
ENSMUST00000170308	ENSMUSG00000007656	Arpp19	protein_coding	390	cds	GGC	NA	111	-1	chr9	75056799	75056801	+	34438	39.374	47.2642	39.8882	48.2724	24.004	37.5796	109.856	126.526	3	3	TRUE	0	FALSE	FALSE
ENSMUST00000164467	ENSMUSG00000007656	Arpp19	nonsense_mediated_decay	51	cds	ATG	TCC	0	-112	chr9	75037916	75037918	+	34435	30.8182	33.1073	44.1938	25.2641	19.799	19.6774	64.7405	108.119	3	3	TRUE	0	FALSE	FALSE
ENSMUST00000164467	ENSMUSG00000007656	Arpp19	nonsense_mediated_decay	384	cds	GGC	NA	111	-1	chr9	75056799	75056801	+	34438	39.4938	38.7718	41.4875	49.328	18.2669	33.0209	100.616	119.753	3	3	TRUE	0	FALSE	FALSE
ENSMUST00000007800	ENSMUSG00000007656	Arpp19	protein_coding	199	cds	ATG	TCC	0	-112	chr9	75037916	75037918	+	34435	31.7543	34.5875	39.3604	26.3555	17.7126	21.2917	65.3598	105.702	3	3	TRUE	0	FALSE	FALSE
ENSMUST00000007800	ENSMUSG00000007656	Arpp19	protein_coding	532	cds	GGC	NA	111	-1	chr9	75056799	75056801	+	34438	42.7366	34.9792	42.679	47.3922	27.7333	37.2622	112.388	120.395	3	3	TRUE	0	FALSE	FALSE
ENSMUST00000168301	ENSMUSG00000007656	Arpp19	protein_coding	169	5utr	NA	NA	-202	-342	chr9	75037917	75037919	+	34436	24.7352	22.4397	21.8623	17.9938	12.3	11.5231	41.8169	69.0372	3	3	FALSE	0	FALSE	FALSE
ENSMUST00000168301	ENSMUSG00000007656	Arpp19	protein_coding	505	cds	GGC	NA	45	-1	chr9	75056799	75056801	+	34438	34.5045	36.3214	41.312	49.887	23.5333	27.5264	100.947	112.138	3	3	TRUE	0	FALSE	FALSE
ENSMUST00000167885	ENSMUSG00000007656	Arpp19	protein_coding	99	5utr	NA	NA	-134	-424	chr9	75037917	75037919	+	34436	25.1341	26.135	22.8246	18.7181	12.1002	17.6202	48.4385	74.0936	3	3	FALSE	0	FALSE	FALSE
ENSMUST00000167885	ENSMUSG00000007656	Arpp19	protein_coding	517	cds	GGC	NA	95	-1	chr9	75056799	75056801	+	34438	40.7867	46.5187	48.3526	53.5231	17.8923	33.4988	104.914	135.658	3	3	TRUE	0	FALSE	FALSE
ENSMUST00000170310	ENSMUSG00000007656	Arpp19	protein_coding	315	cds	GGC	NA	95	-1	chr9	75056799	75056801	+	34438	39.2747	43.8296	48.8846	55.5828	24.699	32.5362	112.818	131.989	3	3	TRUE	0	FALSE	FALSE
ENSMUST00000166549	ENSMUSG00000007656	Arpp19	protein_coding	470	cds	GGC	NA	95	-1	chr9	75056799	75056801	+	34438	44.744	45.594	44.8693	51.9049	16.9333	30.8044	99.6426	135.207	3	3	TRUE	0	FALSE	FALSE
ENSMUST00000169492	ENSMUSG00000007656	Arpp19	protein_coding	449	cds	GGC	NA	144	-1	chr9	75056799	75056801	+	34438	46.9524	45.9321	45.1991	54.5929	20.2073	37.6725	112.473	138.084	3	3	TRUE	0	FALSE	FALSE
ENSMUST00000163242	ENSMUSG00000016541	Atxn10	protein_coding	1279	cds	TCA	GAC	353	-122	chr15	85438123	85438125	+	12510	17.2889	20.4279	19.0537	11.6774	11.141	20.5532	43.3716	56.7705	3	3	FALSE	0	FALSE	TRUE
ENSMUST00000048687	ENSMUSG00000042712	Tceal9	protein_coding	213	5utr	NA	NA	-33	-347	chrX	136245764	136245766	+	36800	41.9525	54.7508	30.1734	35.279	18.7698	24.9846	79.0334	126.877	3	3	FALSE	0	FALSE	FALSE
ENSMUST00000048687	ENSMUSG00000042712	Tceal9	protein_coding	245	cds	ATG	AAA	0	-104	chrX	136246365	136246367	+	36801	29.4026	20.2816	42.0184	23.9326	15.1469	31.1996	70.2792	91.7027	3	3	TRUE	0	FALSE	FALSE
ENSMUST00000048687	ENSMUSG00000042712	Tceal9	protein_coding	554	cds	ATG	NA	103	-1	chrX	136246674	136246676	+	36805	43.1829	54.2573	57.2428	27.0844	15.1469	12.7974	55.0287	154.683	3	3	TRUE	0	FALSE	FALSE
ENSMUST00000113115	ENSMUSG00000042712	Tceal9	protein_coding	82	5utr	NA	NA	-33	-347	chrX	136245764	136245766	+	36800	41.9525	54.7508	30.1734	35.279	18.7698	24.9846	79.0334	126.877	3	3	FALSE	0	FALSE	FALSE
ENSMUST00000113115	ENSMUSG00000042712	Tceal9	protein_coding	114	cds	ATG	AAA	0	-104	chrX	136246365	136246367	+	36801	29.4026	20.2816	42.0184	23.9326	15.1469	31.1996	70.2792	91.7027	3	3	TRUE	0	FALSE	FALSE
ENSMUST00000113115	ENSMUSG00000042712	Tceal9	protein_coding	423	cds	ATG	NA	103	-1	chrX	136246674	136246676	+	36805	43.1829	54.2573	57.2428	27.0844	15.1469	12.7974	55.0287	154.683	3	3	TRUE	0	FALSE	FALSE
ENSMUST00000053540	ENSMUSG00000046432	Bex3	protein_coding	242	cds	ATG	GCC	0	-124	chrX	136271290	136271292	+	36807	51.3259	56.3152	55.8408	36.7805	12.8554	29.96	79.596	163.482	3	3	TRUE	0	FALSE	FALSE
ENSMUST00000053540	ENSMUSG00000046432	Bex3	protein_coding	611	cds	CCT	NA	123	-1	chrX	136271659	136271661	+	36808	123.974	132.218	140.931	62.6579	41.1006	84.9221	188.681	397.123	3	3	TRUE	0	FALSE	FALSE
ENSMUST00000113112	ENSMUSG00000046432	Bex3	protein_coding	521	cds	CCT	NA	113	-1	chrX	136271659	136271661	+	36808	130.009	135.671	148.813	66.6187	41.1006	90.4829	198.202	414.494	3	3	TRUE	0	FALSE	FALSE
ENSMUST00000113113	ENSMUSG00000046432	Bex3	protein_coding	136	cds	ATG	GCC	0	-124	chrX	136271290	136271292	+	36807	51.3259	56.3152	55.8408	36.7805	12.8554	29.96	79.596	163.482	3	3	TRUE	0	FALSE	FALSE
ENSMUST00000113113	ENSMUSG00000046432	Bex3	protein_coding	505	cds	CCT	NA	123	-1	chrX	136271659	136271661	+	36808	123.974	132.218	140.931	62.6579	41.1006	84.9221	188.681	397.123	3	3	TRUE	0	FALSE	FALSE
ENSMUST00000178632	ENSMUSG00000046432	Bex3	protein_coding	245	cds	ATG	GCC	0	-124	chrX	136271290	136271292	+	36807	51.3259	56.3152	55.8408	36.7805	12.8554	29.96	79.596	163.482	3	3	TRUE	0	FALSE	FALSE
ENSMUST00000178632	ENSMUSG00000046432	Bex3	protein_coding	614	cds	CCT	NA	123	-1	chrX	136271659	136271661	+	36808	123.974	132.218	140.931	62.6579	41.1006	84.9221	188.681	397.123	3	3	TRUE	0	FALSE	FALSE
ENSMUST00000071118	ENSMUSG00000057762	Gm6169	protein_coding	249	cds	ACT	GAC	83	-69	chr13	97099048	97099046	-	9997	47.9177	50.2525	46.942	61.1027	23.8164	49.6668	134.586	145.112	3	3	FALSE	0	FALSE	TRUE
ENSMUST00000103146	ENSMUSG00000071415	Rpl23	protein_coding	165	cds	GCA	GAC	28	-112	chr11	97781819	97781817	-	6593	21.5112	11.828	30.4089	17.4405	33.7684	26.4242	77.633	63.7482	3	3	FALSE	0	FALSE	FALSE
ENSMUST00000103146	ENSMUSG00000071415	Rpl23	protein_coding	228	cds	AAC	AGA	49	-91	chr11	97781413	97781411	-	6591	33.8043	29.4065	41.4374	48.3982	11.4069	29.1855	88.9906	104.648	3	3	FALSE	0	FALSE	TRUE
ENSMUST00000103146	ENSMUSG00000071415	Rpl23	protein_coding	282	cds	GGC	AAA	67	-73	chr11	97781359	97781357	-	6590	32.6144	22.8865	35.9514	22.5986	15.1699	33.5581	71.3267	91.4523	3	3	FALSE	0	FALSE	TRUE
ENSMUST00000103146	ENSMUSG00000071415	Rpl23	protein_coding	288	cds	CCA	GAA	69	-71	chr11	97781353	97781351	-	6589	23.6194	13.8652	33.1502	29.6249	13.973	32.6231	76.221	70.6348	3	3	FALSE	0	FALSE	TRUE
ENSMUST00000103146	ENSMUSG00000071415	Rpl23	protein_coding	327	cds	CGA	CAA	82	-58	chr11	97778359	97778357	-	6587	40.2017	17.7936	50.6588	41.0356	34.8584	45.6667	121.561	108.654	3	3	FALSE	0	FALSE	TRUE
ENSMUST00000103146	ENSMUSG00000071415	Rpl23	protein_coding	498	cds	GCA	NA	139	-1	chr11	97778088	97778086	-	6586	92.7559	125.09	99.2148	142.196	73.011	121.574	336.781	317.061	3	3	TRUE	0	FALSE	TRUE
ENSMUST00000128801	ENSMUSG00000071415	Rpl23	protein_coding	262	cds	GCA	GAC	36	-23	chr11	97781819	97781817	-	6593	30.6594	15.6603	48.9762	24.559	42.1161	34.8563	101.531	95.2959	3	3	FALSE	0	FALSE	FALSE
ENSMUST00000032899	ENSMUSG00000030663	1110004F10Rik	protein_coding	702	cds	TCC	NA	180	-1	chr7	116104433	116104435	+	30487	33.5065	49.2899	50.9697	60.1317	30.0782	60.0283	150.238	133.766	3	3	TRUE	0	FALSE	FALSE
ENSMUST00000106608	ENSMUSG00000030663	1110004F10Rik	protein_coding	529	cds	TCC	NA	136	-1	chr7	116104433	116104435	+	30487	31.6119	47.989	47.5859	56.6076	29.5703	57.423	143.601	127.187	3	3	TRUE	0	FALSE	FALSE
ENSMUST00000106607	ENSMUSG00000030663	1110004F10Rik	protein_coding	379	cds	TCC	NA	93	-1	chr7	116104433	116104435	+	30487	33.3198	47.2639	50.6144	55.9705	29.3962	55.619	140.986	131.198	3	3	TRUE	0	FALSE	FALSE
ENSMUST00000032143	ENSMUSG00000030062	Rpn1	protein_coding	421	cds	GGG	TCC	124	-484	chr6	88090022	88090024	+	27867	16.0596	18.4014	11.9586	24.4147	18.8982	27.0328	70.3458	46.4196	3	3	FALSE	0	FALSE	TRUE
ENSMUST00000032143	ENSMUSG00000030062	Rpn1	protein_coding	1870	cds	CTG	NA	607	-1	chr6	88103532	88103534	+	27881	37.6032	46.2776	61.584	50.4745	45.5195	78.8424	174.836	145.465	3	3	TRUE	0	FALSE	TRUE
ENSMUST00000038539	ENSMUSG00000040822	1700123O20Rik	protein_coding	972	cds	GAT	GAC	22	-120	chr14	54689825	54689827	+	11002	16.3132	14.6712	20.9793	12.7424	20.195	25.6663	58.6037	51.9637	3	3	FALSE	0	FALSE	TRUE
ENSMUST00000060805	ENSMUSG00000038014	Fam120a	protein_coding	2967	cds	AGG	ACT	926	-186	chr13	48889146	48889144	-	9555	11.504	13.5974	27.8019	10.0702	26.5581	17.0649	53.6933	52.9033	3	3	FALSE	0	FALSE	TRUE
ENSMUST00000033671	ENSMUSG00000031309	Rps6ka3	protein_coding	2479	cds	CTG	NA	739	-1	chrX	159363479	159363481	+	36942	32.3622	34.9091	42.9309	29.1927	23.1926	22.6667	75.052	110.202	3	3	TRUE	0	FALSE	FALSE
ENSMUST00000112493	ENSMUSG00000031309	Rps6ka3	protein_coding	2648	cds	CTG	NA	711	-1	chrX	159363479	159363481	+	36942	32.3622	34.5194	42.1456	28.6173	22.8251	22.6667	74.109	109.027	3	3	TRUE	0	FALSE	FALSE
ENSMUST00000068439	ENSMUSG00000055044	Pdlim1	protein_coding	268	cds	CGG	GTC	31	-296	chr19	40271349	40271347	-	17864	42.1361	70.0265	45.2538	81.5357	48.8391	40.6681	171.043	157.416	3	3	FALSE	0	FALSE	FALSE
ENSMUST00000068439	ENSMUSG00000055044	Pdlim1	protein_coding	991	cds	AGG	GAT	272	-55	chr19	40222753	40222751	-	17858	26.204	20.455	21.1543	16.3518	12.0695	27.9543	56.3755	67.8133	3	3	FALSE	0	FALSE	TRUE
ENSMUST00000182432	ENSMUSG00000055044	Pdlim1	protein_coding	191	cds	CGG	GTC	31	-166	chr19	40271349	40271347	-	17864	42.6152	70.0265	44.3301	82.607	48.8391	42.1498	173.596	156.972	3	3	FALSE	0	FALSE	FALSE
ENSMUST00000112507	ENSMUSG00000002017	Fam98a	protein_coding	153	cds	ATG	GAG	0	-515	chr17	75551794	75551792	-	15653	37.6733	32.3354	61.4414	42.7263	30.1562	32.253	105.135	131.45	3	3	TRUE	0	FALSE	TRUE
ENSMUST00000005964	ENSMUSG00000028138	Adh5	protein_coding	1208	cds	ATG	NA	373	-1	chr3	138455103	138455105	+	22387	34.7231	22.0996	44.3397	34.3275	24.6713	53.6867	112.685	101.162	3	3	TRUE	0	FALSE	TRUE
ENSMUST00000087143	ENSMUSG00000067194	Eif1ax	protein_coding	182	5utr	NA	NA	-41	-475	chrX	159372359	159372361	+	36943	24.6803	24.1617	21.0052	16.5501	11.9306	21.5924	50.0731	69.8472	3	3	FALSE	0	FALSE	TRUE
ENSMUST00000087143	ENSMUSG00000067194	Eif1ax	protein_coding	651	cds	ATC	NA	143	-1	chrX	159382779	159385409	+	36948	22.7589	21.6261	25.3232	23.4023	14.7415	11.2031	49.347	69.7082	3	3	TRUE	0	FALSE	TRUE
ENSMUST00000164744	ENSMUSG00000030061	Uba3	protein_coding	1349	cds	ACT	NA	447	-1	chr6	97184786	97184784	-	28045	22.5578	22.3638	28.1863	35.6965	14.6071	22.3607	72.6643	73.1078	3	3	TRUE	0	FALSE	TRUE
ENSMUST00000089287	ENSMUSG00000030061	Uba3	protein_coding	1478	cds	ACT	NA	461	-1	chr6	97184781	97184779	-	28044	22.5578	22.3638	28.1863	35.6965	14.6071	22.3607	72.6643	73.1078	3	3	TRUE	0	FALSE	TRUE
ENSMUST00000163153	ENSMUSG00000032050	Rdx	protein_coding	366	cds	GCT	AAA	81	-502	chr9	52065672	52065674	+	33826	17.4295	14.7802	14.353	23.8118	17.1677	24.0454	65.0248	46.5626	3	3	FALSE	0	FALSE	TRUE
ENSMUST00000000590	ENSMUSG00000032050	Rdx	protein_coding	621	cds	GCT	AAA	81	-502	chr9	52063634	52063636	+	33821	17.4295	14.7802	14.353	23.8118	17.1677	24.0454	65.0248	46.5626	3	3	FALSE	0	FALSE	TRUE
ENSMUST00000061352	ENSMUSG00000032050	Rdx	protein_coding	465	cds	GCT	AAA	81	-308	chr9	52048405	52048407	+	33815	17.4295	14.7802	14.353	23.8118	17.1677	24.0454	65.0248	46.5626	3	3	FALSE	0	FALSE	TRUE
ENSMUST00000161075	ENSMUSG00000026502	Desi2	protein_coding	1151	cds	CTA	NA	177	-1	chr1	178249462	178249464	+	2185	18.2367	24.1667	15.1667	31.0345	12	17.9353	60.9698	57.5701	3	3	TRUE	0	FALSE	FALSE
ENSMUST00000027783	ENSMUSG00000026502	Desi2	protein_coding	963	cds	CTA	NA	193	-1	chr1	178249462	178249464	+	2185	18.4607	24.1667	15.1667	31.4453	12	17.9353	61.3806	57.794	3	3	TRUE	0	FALSE	FALSE
ENSMUST00000021018	ENSMUSG00000020680	Taf15	protein_coding	1773	cds	CCA	TAC	555	-2	chr11	83506448	83506450	+	6128	10.142	24.9167	15.7333	27.3825	21.5078	14.5333	63.4236	50.7921	3	3	TRUE	0	FALSE	TRUE
ENSMUST00000060043	ENSMUSG00000045962	Wnk1	protein_coding	83	5utr	NA	NA	-958	-8091	chr6	120038590	120038588	-	28229	83.8734	71.0994	98.0407	54.9113	11.4309	50.4622	116.804	253.013	3	3	FALSE	0	FALSE	TRUE
ENSMUST00000060043	ENSMUSG00000045962	Wnk1	protein_coding	165	5utr	NA	NA	-876	-8009	chr6	120038508	120038506	-	28226	137.129	131.589	120.109	104.431	32.2565	55.4114	192.099	388.828	3	3	FALSE	0	FALSE	TRUE
ENSMUST00000060043	ENSMUSG00000045962	Wnk1	protein_coding	166	5utr	NA	NA	-875	-8008	chr6	120038507	120038505	-	28225	28.0406	22.5582	20.8	12.8191	13.0157	12.8477	38.6825	71.3988	3	3	FALSE	0	FALSE	TRUE
ENSMUST00000060043	ENSMUSG00000045962	Wnk1	protein_coding	513	5utr	NA	NA	-528	-7661	chr6	120038160	120038158	-	28220	17.733	25.5453	24.7408	31.8018	15.7644	36.6042	84.1704	68.0192	3	3	FALSE	0	FALSE	TRUE
ENSMUST00000060043	ENSMUSG00000045962	Wnk1	protein_coding	8168	cds	ACC	NA	2376	-1	chr6	119926376	119926374	-	28185	57.5415	81.8458	128.779	72.2422	29.7332	50.8687	152.844	268.167	3	3	TRUE	0	FALSE	TRUE
ENSMUST00000088646	ENSMUSG00000045962	Wnk1	protein_coding	6609	cds	ACC	NA	2194	-1	chr6	119937455	119937453	-	28186	57.5415	81.8458	126.694	72.2422	29.7332	50.8687	152.844	266.081	3	3	TRUE	0	FALSE	TRUE
ENSMUST00000033761	ENSMUSG00000031386	Hcfc1	protein_coding	6486	cds	CAG	NA	2044	-1	chrX	73944444	73944442	-	36118	16.5385	19.7761	19.8041	30.8959	31.4011	29.5182	91.8152	56.1186	3	3	TRUE	0	FALSE	FALSE
ENSMUST00000114372	ENSMUSG00000031386	Hcfc1	protein_coding	6615	cds	CAG	NA	2089	-1	chrX	73944444	73944442	-	36118	16.5396	19.8901	19.8706	31.0552	31.6942	29.4553	92.2048	56.3003	3	3	TRUE	0	FALSE	FALSE
ENSMUST00000111754	ENSMUSG00000050565	Tor1aip2	protein_coding	839	cds	ATG	TTC	0	-131	chr1	156051877	156051879	+	1835	38.4566	42.6257	59.0912	28.4021	13.5572	29.6924	71.6516	140.174	3	3	TRUE	0	FALSE	FALSE
ENSMUST00000128941	ENSMUSG00000050565	Tor1aip2	protein_coding	1066	cds	ATG	TTC	0	-131	chr1	156051877	156051879	+	1835	38.4566	42.6257	59.0912	28.4021	13.5572	29.6924	71.6516	140.174	3	3	TRUE	0	FALSE	FALSE
ENSMUST00000065648	ENSMUSG00000050565	Tor1aip2	protein_coding	670	cds	ATG	TTC	0	-131	chr1	156051877	156051879	+	1835	38.4566	42.6257	59.0912	28.4021	13.5572	29.6924	71.6516	140.174	3	3	TRUE	0	FALSE	FALSE
ENSMUST00000097526	ENSMUSG00000050565	Tor1aip2	protein_coding	730	cds	ATG	TTC	0	-131	chr1	156051877	156051879	+	1835	38.4566	42.6257	59.0912	28.4021	13.5572	29.6924	71.6516	140.174	3	3	TRUE	0	FALSE	FALSE
ENSMUST00000181173	ENSMUSG00000097148	Gm3839	protein_coding	723	cds	CCC	ATC	70	-263	chr14	11281724	11281722	-	10368	18.8022	18.1648	34.1828	19.4113	12.749	18.927	51.0873	71.1498	3	3	FALSE	0	FALSE	TRUE
ENSMUST00000181173	ENSMUSG00000097148	Gm3839	protein_coding	891	cds	CCC	ATG	126	-207	chr14	11281556	11281554	-	10364	29.7398	58.8871	14.5252	47.8204	27.9525	22.4567	98.2296	103.152	3	3	FALSE	0	FALSE	TRUE
ENSMUST00000181173	ENSMUSG00000097148	Gm3839	protein_coding	945	cds	GTC	AGC	144	-189	chr14	11281502	11281500	-	10361	15.9425	10.9233	23.0617	15.1905	10.8654	21.9525	48.0084	49.9276	3	3	FALSE	0	FALSE	TRUE
ENSMUST00000181173	ENSMUSG00000097148	Gm3839	protein_coding	1002	cds	GAC	AAC	163	-170	chr14	11281445	11281443	-	10358	19.3898	15.5851	24.2276	15.2251	11.4773	15.3312	42.0336	59.2025	3	3	FALSE	0	FALSE	TRUE
ENSMUST00000181173	ENSMUSG00000097148	Gm3839	protein_coding	1059	cds	CAG	AAG	182	-151	chr14	11281388	11281386	-	10353	16.6641	24.1745	20.4023	31.7219	41.1377	37.5841	110.444	61.2408	3	3	FALSE	0	FALSE	TRUE
ENSMUST00000181173	ENSMUSG00000097148	Gm3839	protein_coding	1158	cds	GGC	AAG	215	-118	chr14	11281289	11281287	-	10349	17.9941	10.5625	11.3239	17.6941	19.1585	12.5716	49.4243	39.8805	3	3	FALSE	0	FALSE	TRUE
ENSMUST00000181173	ENSMUSG00000097148	Gm3839	protein_coding	1233	cds	GTG	GAT	240	-93	chr14	11281214	11281212	-	10345	40.0392	39.889	45.3733	36.8284	23.9161	35.7688	96.5133	125.302	3	3	FALSE	0	FALSE	TRUE
ENSMUST00000181173	ENSMUSG00000097148	Gm3839	protein_coding	1398	cds	GGG	GCT	295	-38	chr14	11281049	11281047	-	10337	29.6193	49.3943	44.1703	64.5652	28.2738	31.6039	124.443	123.184	3	3	FALSE	0	FALSE	TRUE
ENSMUST00000181173	ENSMUSG00000097148	Gm3839	protein_coding	1509	cds	GAG	NA	332	-1	chr14	11280938	11280936	-	10332	337.136	398.966	419.916	469.697	234.029	452.953	1156.68	1156.02	3	3	TRUE	0	FALSE	TRUE
ENSMUST00000073471	ENSMUSG00000060938	Rpl26	protein_coding	47	cds	ATG	AAG	0	-145	chr11	68902274	68902276	+	5450	251.404	221.192	247.147	322.769	146.097	281.602	750.468	719.742	3	3	TRUE	0	FALSE	TRUE
ENSMUST00000073471	ENSMUSG00000060938	Rpl26	protein_coding	371	cds	CTA	AAG	108	-37	chr11	68904379	68904381	+	5466	41.4125	35.7414	42.5609	58.2094	41.918	48.8459	148.973	119.715	3	3	FALSE	0	FALSE	FALSE
ENSMUST00000073471	ENSMUSG00000060938	Rpl26	protein_coding	476	cds	CAG	GAG	143	-2	chr11	68904484	68904486	+	5469	12.9935	13.6782	13.9419	15.401	14.1269	19.8537	49.3817	40.6136	3	3	TRUE	0	FALSE	FALSE
ENSMUST00000101014	ENSMUSG00000060938	Rpl26	protein_coding	256	cds	CGG	CAT	16	-127	chr11	68902322	68902324	+	5453	14.4501	11.875	15.6087	13.2862	12.8749	18.892	45.053	41.9338	3	3	FALSE	0	FALSE	FALSE
ENSMUST00000101014	ENSMUSG00000060938	Rpl26	protein_coding	526	cds	CTA	AAG	106	-37	chr11	68904379	68904381	+	5466	50.0289	42.649	51.1938	66.3688	49.4863	59.4443	175.299	143.872	3	3	FALSE	0	FALSE	FALSE
ENSMUST00000101014	ENSMUSG00000060938	Rpl26	protein_coding	577	cds	CGA	CAA	123	-20	chr11	68904430	68904432	+	5468	18.4185	15.0022	28.2612	27.8304	11.8478	28.1554	67.8336	61.6819	3	3	FALSE	0	FALSE	FALSE
ENSMUST00000101014	ENSMUSG00000060938	Rpl26	protein_coding	631	cds	CAG	GAG	141	-2	chr11	68904484	68904486	+	5469	17.3238	17.7144	18.3765	21.0746	17.7407	25.7066	64.522	53.4146	3	3	TRUE	0	FALSE	FALSE
ENSMUST00000128952	ENSMUSG00000060938	Rpl26	protein_coding	239	cds	CGG	CAT	16	-86	chr11	68902322	68902324	+	5453	14.995	11.875	15.2472	13.2862	12.8749	18.892	45.053	42.1172	3	3	FALSE	0	FALSE	FALSE
ENSMUST00000167436	ENSMUSG00000060938	Rpl26	protein_coding	176	cds	CGG	CAT	16	-129	chr11	68902322	68902324	+	5453	13.9196	11.875	14.986	13.2862	12.8749	18.892	45.053	40.7806	3	3	FALSE	0	FALSE	FALSE
ENSMUST00000167436	ENSMUSG00000060938	Rpl26	protein_coding	452	cds	CTA	AAG	108	-37	chr11	68904379	68904381	+	5466	48.8521	41.6182	49.8548	66.3688	48.2556	58.1204	172.745	140.325	3	3	FALSE	0	FALSE	FALSE
ENSMUST00000167436	ENSMUSG00000060938	Rpl26	protein_coding	503	cds	CGA	CAA	125	-20	chr11	68904430	68904432	+	5468	17.8159	14.3883	27.3838	26.8615	11.3876	27.3891	65.6382	59.588	3	3	FALSE	0	FALSE	FALSE
ENSMUST00000167436	ENSMUSG00000060938	Rpl26	protein_coding	557	cds	CAG	GAG	143	-2	chr11	68904484	68904486	+	5469	16.7411	17.0449	17.698	20.2515	17.1599	24.984	62.3955	51.4839	3	3	TRUE	0	FALSE	FALSE
ENSMUST00000149241	ENSMUSG00000032135	Mcam	nonsense_mediated_decay	221	cds	ATG	GGG	0	-146	chr9	44134689	44134691	+	33588	39.0733	38.5029	41.5993	26.1817	16.3254	35.8267	78.3338	119.176	3	3	TRUE	0	FALSE	FALSE
ENSMUST00000034650	ENSMUSG00000032135	Mcam	protein_coding	128	cds	ATG	GGG	0	-648	chr9	44134689	44134691	+	33588	28.5678	29.5391	29.7159	19.8831	13.0891	25.2928	58.265	87.8228	3	3	TRUE	0	FALSE	FALSE
ENSMUST00000034650	ENSMUSG00000032135	Mcam	protein_coding	2069	cds	CAT	NA	647	-1	chr9	44141807	44141809	+	33601	26.0301	23.5605	36.7178	25.0757	11.4953	16.7139	53.2849	86.3084	3	3	TRUE	0	FALSE	TRUE
ENSMUST00000098852	ENSMUSG00000032135	Mcam	protein_coding	32	cds	ATG	GGG	0	-606	chr9	44134689	44134691	+	33588	28.5994	29.2241	29.5752	19.9054	13.0554	25.3166	58.2774	87.3987	3	3	TRUE	0	FALSE	FALSE
ENSMUST00000022573	ENSMUSG00000021996	Esd	protein_coding	870	cds	TAT	GAT	257	-25	chr14	74749647	74749649	+	11256	14.5123	15.2766	20.8427	21.4207	13.4772	11.5521	46.4501	50.6315	3	3	FALSE	0	FALSE	FALSE
ENSMUST00000022573	ENSMUSG00000021996	Esd	protein_coding	942	cds	GCA	NA	281	-1	chr14	74749719	74749721	+	11264	58.8939	71.138	97.1635	74.3384	31.0453	69.3782	174.762	227.195	3	3	TRUE	0	FALSE	FALSE
ENSMUST00000176957	ENSMUSG00000021996	Esd	protein_coding	916	cds	TAT	GAT	270	-25	chr14	74749647	74749649	+	11256	14.6643	15.5188	19.8923	22.0821	14.1423	11.6966	47.921	50.0754	3	3	FALSE	0	FALSE	FALSE
ENSMUST00000176957	ENSMUSG00000021996	Esd	protein_coding	988	cds	GCA	NA	294	-1	chr14	74749719	74749721	+	11264	59.371	73.103	96.4995	72.6833	30.77	69.3782	172.831	228.973	3	3	TRUE	0	FALSE	FALSE
ENSMUST00000175887	ENSMUSG00000021996	Esd	protein_coding	672	cds	TAT	GAT	224	-25	chr14	74749647	74749649	+	11256	14.3627	14.9006	20.5854	21.6809	14.0273	11.2705	46.9787	49.8486	3	3	FALSE	0	FALSE	FALSE
ENSMUST00000175887	ENSMUSG00000021996	Esd	protein_coding	744	cds	GCA	NA	248	-1	chr14	74749719	74749721	+	11264	59.371	72.4748	96.83	72.4162	29.7205	71.3816	173.518	228.676	3	3	TRUE	0	FALSE	FALSE
ENSMUST00000029771	ENSMUSG00000028128	F3	protein_coding	178	cds	ATG	GCG	0	-294	chr3	121723714	121723716	+	22264	49.1533	75.7116	34.2612	37.3781	17.9655	14.7162	70.0597	159.126	3	3	TRUE	0	FALSE	TRUE
ENSMUST00000029421	ENSMUSG00000027832	Ptx3	protein_coding	1292	cds	TCT	NA	380	-1	chr3	66225199	66225201	+	21193	14.6638	15.292	31.1737	33.7253	24.5709	16.7248	75.0211	61.1295	3	3	TRUE	0	FALSE	TRUE
ENSMUST00000072232	ENSMUSG00000058587	Tmod3	protein_coding	1252	cds	CAG	NA	351	-1	chr9	75500122	75500120	-	34439	11.6965	22.9474	15.5427	21.5451	11.0932	18.9307	51.569	50.1866	3	3	TRUE	0	FALSE	TRUE
ENSMUST00000161769	ENSMUSG00000039630	Hnrnpu	nonsense_mediated_decay	319	cds	GGG	AAC	54	-739	chr1	178337410	178337408	-	2229	15.1519	14.6887	14.791	20.0638	11.0138	11.7211	42.7987	44.6316	3	3	FALSE	0	FALSE	FALSE
ENSMUST00000161769	ENSMUSG00000039630	Hnrnpu	nonsense_mediated_decay	1204	cds	GAA	GAA	349	-444	chr1	178333108	178333106	-	2220	31.2021	36.7902	47.5816	42.202	24.1897	28.7879	95.1796	115.574	3	3	FALSE	0	FALSE	FALSE
ENSMUST00000161769	ENSMUSG00000039630	Hnrnpu	nonsense_mediated_decay	1432	cds	TGC	CAT	425	-368	chr1	178332240	178332238	-	2215	10.7407	17.3612	12.5715	12.3524	14.6996	27.1803	54.2323	40.6734	3	3	FALSE	0	FALSE	FALSE
ENSMUST00000161769	ENSMUSG00000039630	Hnrnpu	nonsense_mediated_decay	2119	cds	CCA	GAA	654	-139	chr1	178330725	178330723	-	2199	80.9667	63.339	82.2348	116.673	40.3297	133.883	290.886	226.54	3	3	FALSE	0	FALSE	FALSE
ENSMUST00000037748	ENSMUSG00000039630	Hnrnpu	protein_coding	388	cds	GGG	AAC	54	-746	chr1	178337410	178337408	-	2229	14.7517	14.3553	14.3931	19.5367	10.6355	11.3035	41.4757	43.5001	3	3	FALSE	0	FALSE	FALSE
ENSMUST00000037748	ENSMUSG00000039630	Hnrnpu	protein_coding	1273	cds	GAA	GAA	349	-451	chr1	178333108	178333106	-	2220	31.2021	36.7902	47.5816	42.202	24.1897	28.7879	95.1796	115.574	3	3	FALSE	0	FALSE	FALSE
ENSMUST00000037748	ENSMUSG00000039630	Hnrnpu	protein_coding	1501	cds	TGC	CAT	425	-375	chr1	178332240	178332238	-	2215	10.7407	17.3612	12.5715	12.3524	14.6996	27.1803	54.2323	40.6734	3	3	FALSE	0	FALSE	FALSE
ENSMUST00000037748	ENSMUSG00000039630	Hnrnpu	protein_coding	2188	cds	CCA	GAA	654	-146	chr1	178330725	178330723	-	2199	80.9667	62.2475	80.5708	114.34	39.2516	130.7	284.291	223.785	3	3	FALSE	0	FALSE	FALSE
ENSMUST00000113705	ENSMUSG00000032366	Tpm1	protein_coding	70	5utr	NA	NA	-66	-920	chr9	67049198	67049196	-	34296	72.5179	80.6044	42.7681	38.5435	24.7736	32.6331	95.9502	195.89	3	3	FALSE	0	FALSE	FALSE
ENSMUST00000113707	ENSMUSG00000032366	Tpm1	protein_coding	209	5utr	NA	NA	-66	-920	chr9	67049198	67049196	-	34296	59.2292	60.6563	29.43	28.3319	16.3502	28.0126	72.6947	149.316	3	3	FALSE	0	FALSE	FALSE
ENSMUST00000113707	ENSMUSG00000032366	Tpm1	protein_coding	475	cds	CAG	GAG	67	-217	chr9	67047825	67047823	-	34286	23.6252	24.3039	26.1396	22.0037	13.3989	29.1671	64.5697	74.0687	3	3	FALSE	0	FALSE	FALSE
ENSMUST00000113707	ENSMUSG00000032366	Tpm1	protein_coding	514	cds	GCT	GAA	80	-204	chr9	67036128	67047786	-	34284	40.508	54.9059	32.6265	31.3941	23.6696	30.0165	85.0801	128.04	3	3	FALSE	0	FALSE	FALSE
ENSMUST00000113707	ENSMUSG00000032366	Tpm1	protein_coding	520	cds	GCT	GAC	82	-202	chr9	67036123	67036121	-	34283	31.5225	26.7373	37.4192	24.0326	24.4406	39.2794	87.7525	95.679	3	3	FALSE	0	FALSE	FALSE
ENSMUST00000113707	ENSMUSG00000032366	Tpm1	protein_coding	1117	cds	AAC	AAC	281	-3	chr9	67023371	67023369	-	34268	23.1647	15.1244	32.4607	12.4643	10.5278	24.7535	47.7456	70.7498	3	3	FALSE	0	FALSE	FALSE
ENSMUST00000113690	ENSMUSG00000032366	Tpm1	protein_coding	721	cds	CTT	GAA	156	-89	chr9	67032014	67032012	-	34280	22.6683	11.0536	35.8798	12.5639	10.0855	19.0992	41.7486	69.6018	3	3	FALSE	0	FALSE	FALSE
ENSMUST00000113690	ENSMUSG00000032366	Tpm1	protein_coding	2112	3utr	NA	NA	1858	1121	chr9	67023371	67023369	-	34268	28.1937	22.1291	37.3897	14.9906	12.9096	21.4191	49.3192	87.7126	3	3	FALSE	0	FALSE	FALSE
ENSMUST00000034928	ENSMUSG00000032366	Tpm1	protein_coding	12	5utr	NA	NA	-66	-1046	chr9	67049198	67049196	-	34296	57.243	61.4319	23.1857	30.1537	17.6831	23.3164	71.1531	141.861	3	3	FALSE	0	FALSE	FALSE
ENSMUST00000034928	ENSMUSG00000032366	Tpm1	protein_coding	404	cds	CAG	GAG	109	-217	chr9	67047825	67047823	-	34286	25.3035	23.5906	25.6298	25.1955	14.0399	28.307	67.5424	74.5239	3	3	FALSE	0	FALSE	FALSE
ENSMUST00000034928	ENSMUSG00000032366	Tpm1	protein_coding	443	cds	GCT	GAA	122	-204	chr9	67036128	67047786	-	34284	42.5049	54.7699	32.359	33.0538	20.0442	29.6156	82.7135	129.634	3	3	FALSE	0	FALSE	FALSE
ENSMUST00000034928	ENSMUSG00000032366	Tpm1	protein_coding	449	cds	GCT	GAC	124	-202	chr9	67036123	67036121	-	34283	32.4065	28.3847	38.5388	21.8107	27.7564	37.895	87.4621	99.33	3	3	FALSE	0	FALSE	FALSE
ENSMUST00000129733	ENSMUSG00000032366	Tpm1	nonsense_mediated_decay	294	cds	GCT	GAA	80	-77	chr9	67036128	67047786	-	34284	42.7864	54.1453	26.6558	35.431	23.2646	29.4917	88.1874	123.588	3	3	FALSE	0	FALSE	FALSE
ENSMUST00000129733	ENSMUSG00000032366	Tpm1	nonsense_mediated_decay	300	cds	GCT	GAC	82	-75	chr9	67036123	67036121	-	34283	31.7053	27.2965	40.4749	22.9613	23.8223	37.6644	84.448	99.4766	3	3	FALSE	0	FALSE	FALSE
ENSMUST00000129733	ENSMUSG00000032366	Tpm1	nonsense_mediated_decay	779	3utr	NA	NA	724	251	chr9	67023371	67023369	-	34268	29.8803	22.0982	34.5012	15.2505	14.8981	20.4048	50.5533	86.4797	3	3	FALSE	0	FALSE	FALSE
ENSMUST00000113701	ENSMUSG00000032366	Tpm1	protein_coding	69	cds	ATG	GAC	0	-284	chr9	67049133	67049131	-	34293	55.5646	50.1923	59.9983	48.1463	12.4445	10.1913	70.7821	165.755	3	3	TRUE	0	FALSE	FALSE
ENSMUST00000113697	ENSMUSG00000032366	Tpm1	protein_coding	78	5utr	NA	NA	-66	-920	chr9	67049198	67049196	-	34296	71.8931	71.9848	33.1319	32.2927	17.7691	27.9344	77.9963	177.01	3	3	FALSE	0	FALSE	FALSE
ENSMUST00000113697	ENSMUSG00000032366	Tpm1	protein_coding	344	cds	CAG	GAG	67	-217	chr9	67047825	67047823	-	34286	23.0243	23.5775	22.733	26.026	13.5273	28.7726	68.3259	69.3348	3	3	FALSE	0	FALSE	FALSE
ENSMUST00000113697	ENSMUSG00000032366	Tpm1	protein_coding	383	cds	GCT	GAA	80	-204	chr9	67036128	67047786	-	34284	39.5693	54.3918	29.4855	32.9684	23.9549	28.6122	85.5354	123.447	3	3	FALSE	0	FALSE	FALSE
ENSMUST00000113697	ENSMUSG00000032366	Tpm1	protein_coding	389	cds	GCT	GAC	82	-202	chr9	67036123	67036121	-	34283	32.3684	25.7876	40.2678	21.4884	24.5885	37.7583	83.8352	98.4238	3	3	FALSE	0	FALSE	FALSE
ENSMUST00000113693	ENSMUSG00000032366	Tpm1	protein_coding	280	cds	GCT	GAA	80	-201	chr9	67036128	67047786	-	34284	41.4042	54.9039	31.0124	31.8949	22.2533	28.9362	83.0844	127.321	3	3	FALSE	0	FALSE	FALSE
ENSMUST00000113693	ENSMUSG00000032366	Tpm1	protein_coding	286	cds	GCT	GAC	82	-199	chr9	67036123	67036121	-	34283	31.313	27.3888	38.4974	23.3469	24.1723	41.676	89.1951	97.1992	3	3	FALSE	0	FALSE	FALSE
ENSMUST00000113685	ENSMUSG00000032366	Tpm1	protein_coding	16	5utr	NA	NA	-66	-920	chr9	67049198	67049196	-	34296	79.2078	83.4679	40.1364	43.1867	21.1733	33.6258	97.9857	202.812	3	3	FALSE	0	FALSE	FALSE
ENSMUST00000113685	ENSMUSG00000032366	Tpm1	protein_coding	282	cds	CAG	GAG	67	-217	chr9	67047825	67047823	-	34286	24.8008	25.5961	21.578	24.5893	10.429	30.9661	65.9844	71.9748	3	3	FALSE	0	FALSE	FALSE
ENSMUST00000113685	ENSMUSG00000032366	Tpm1	protein_coding	321	cds	GCT	GAA	80	-204	chr9	67036128	67047786	-	34284	42.8177	56.0028	30.5328	30.5344	22.8974	31.8598	85.2916	129.353	3	3	FALSE	0	FALSE	FALSE
ENSMUST00000113685	ENSMUSG00000032366	Tpm1	protein_coding	327	cds	GCT	GAC	82	-202	chr9	67036123	67036121	-	34283	29.9547	27.9523	40.7139	23.2888	24.1723	33.373	80.8341	98.6208	3	3	FALSE	0	FALSE	FALSE
ENSMUST00000050905	ENSMUSG00000032366	Tpm1	protein_coding	67	5utr	NA	NA	-66	-920	chr9	67049198	67049196	-	34296	90.978	100.706	50.8404	48.2274	24.6685	37.6008	110.497	242.524	3	3	FALSE	0	FALSE	FALSE
ENSMUST00000050905	ENSMUSG00000032366	Tpm1	protein_coding	132	cds	ATG	GAC	0	-284	chr9	67049133	67049131	-	34293	54.5782	55.1433	58.1966	54.0506	10.3322	10.2269	74.6098	167.918	3	3	TRUE	0	FALSE	FALSE
ENSMUST00000050905	ENSMUSG00000032366	Tpm1	protein_coding	333	cds	CAG	GAG	67	-217	chr9	67047825	67047823	-	34286	20.2599	22.9464	22.2158	23.4436	12.7493	25.7134	61.9064	65.4222	3	3	FALSE	0	FALSE	FALSE
ENSMUST00000050905	ENSMUSG00000032366	Tpm1	protein_coding	372	cds	GCT	GAA	80	-204	chr9	67036128	67047786	-	34284	41.7986	54.4415	31.4351	33.0123	27.0915	29.3055	89.4093	127.675	3	3	FALSE	0	FALSE	FALSE
ENSMUST00000050905	ENSMUSG00000032366	Tpm1	protein_coding	378	cds	GCT	GAC	82	-202	chr9	67036123	67036121	-	34283	31.0278	26.7004	40.5154	22.7672	23.7792	41.7556	88.302	98.2436	3	3	FALSE	0	FALSE	FALSE
ENSMUST00000113687	ENSMUSG00000032366	Tpm1	protein_coding	212	cds	CAG	GAG	67	-220	chr9	67047825	67047823	-	34286	25.4253	26.9539	26.8807	23.0978	11.577	28.5619	63.2367	79.2598	3	3	FALSE	0	FALSE	FALSE
ENSMUST00000113687	ENSMUSG00000032366	Tpm1	protein_coding	251	cds	GCT	GAA	80	-207	chr9	67036128	67047786	-	34284	43.8229	56.793	30.0967	30.6981	24.004	26.9853	81.6873	130.713	3	3	FALSE	0	FALSE	FALSE
ENSMUST00000113687	ENSMUSG00000032366	Tpm1	protein_coding	257	cds	GCT	GAC	82	-205	chr9	67036123	67036121	-	34283	30.7255	29.7701	38.968	25.1787	27.4891	42.0089	94.6766	99.4636	3	3	FALSE	0	FALSE	FALSE
ENSMUST00000113687	ENSMUSG00000032366	Tpm1	protein_coding	587	cds	CTT	GAA	192	-95	chr9	67032014	67032012	-	34280	22.8032	14.0404	34.3942	12.3109	11.5	18.4946	42.3055	71.2378	3	3	FALSE	0	FALSE	FALSE
ENSMUST00000030185	ENSMUSG00000032366	Tpm1	protein_coding	65	5utr	NA	NA	-66	-920	chr9	67049198	67049196	-	34296	75.4881	84.6108	43.7242	35.5017	24.1027	35.7273	95.3317	203.823	3	3	FALSE	0	FALSE	FALSE
ENSMUST00000030185	ENSMUSG00000032366	Tpm1	protein_coding	331	cds	CAG	GAG	67	-217	chr9	67047825	67047823	-	34286	24.7239	27.2251	23.8794	22.7174	14.1403	28.4457	65.3034	75.8284	3	3	FALSE	0	FALSE	FALSE
ENSMUST00000030185	ENSMUSG00000032366	Tpm1	protein_coding	370	cds	GCT	GAA	80	-204	chr9	67036128	67047786	-	34284	44.4467	51.115	31.4964	32.4761	20.2672	32.5702	85.3134	127.058	3	3	FALSE	0	FALSE	FALSE
ENSMUST00000030185	ENSMUSG00000032366	Tpm1	protein_coding	376	cds	GCT	GAC	82	-202	chr9	67036123	67036121	-	34283	31.638	27.9877	41.0302	23.2517	29.0611	33.9915	86.3043	100.656	3	3	FALSE	0	FALSE	FALSE
ENSMUST00000021063	ENSMUSG00000020720	Psmd12	protein_coding	453	cds	AAG	CTG	120	-336	chr11	107486476	107486478	+	7115	11.9377	15.9635	15.9217	12.5008	12.7889	13.4164	38.7061	43.8228	3	3	FALSE	0	FALSE	FALSE
ENSMUST00000106752	ENSMUSG00000020720	Psmd12	protein_coding	409	cds	AAG	CTG	120	-298	chr11	107486476	107486478	+	7115	11.9377	15.9635	15.9217	12.5008	12.7889	13.4164	38.7061	43.8228	3	3	FALSE	0	FALSE	FALSE
ENSMUST00000106750	ENSMUSG00000020720	Psmd12	protein_coding	300	cds	AAG	CTG	100	-336	chr11	107486476	107486478	+	7115	11.9377	15.9635	15.9217	12.5008	12.7889	13.4164	38.7061	43.8228	3	3	FALSE	0	FALSE	FALSE
ENSMUST00000177163	ENSMUSG00000093674	Rpl41	protein_coding	193	cds	ATG	AGA	0	-25	chr10	128548961	128548959	-	4236	23.2153	35.9059	26.0673	28.7497	16.7752	12.4864	58.0112	85.1884	3	3	TRUE	0	FALSE	FALSE
ENSMUST00000177163	ENSMUSG00000093674	Rpl41	protein_coding	226	cds	AGG	CTG	11	-14	chr10	128548660	128548658	-	4232	35.7448	22.1265	48.3778	38.142	23.2872	45.6814	107.111	106.249	3	3	FALSE	0	FALSE	FALSE
ENSMUST00000176683	ENSMUSG00000093674	Rpl41	protein_coding	86	cds	ATG	AGA	0	-25	chr10	128548961	128548959	-	4236	22.7131	31.7771	24.8182	26.778	12.6671	11.5292	50.9744	79.3083	3	3	TRUE	0	FALSE	FALSE
ENSMUST00000176683	ENSMUSG00000093674	Rpl41	protein_coding	119	cds	AGG	CTG	11	-14	chr10	128548660	128548658	-	4232	35.7998	22.4663	48.5455	38.3448	23.7601	45.8034	107.908	106.812	3	3	FALSE	0	FALSE	FALSE
ENSMUST00000176010	ENSMUSG00000093674	Rpl41	protein_coding	231	cds	ATG	AGA	0	-25	chr10	128548961	128548959	-	4236	23.2153	35.9059	26.0673	28.7497	16.7752	12.4864	58.0112	85.1884	3	3	TRUE	0	FALSE	FALSE
ENSMUST00000176010	ENSMUSG00000093674	Rpl41	protein_coding	264	cds	AGG	CTG	11	-14	chr10	128548660	128548658	-	4232	35.7448	22.1265	48.3778	38.142	23.2872	45.6814	107.111	106.249	3	3	FALSE	0	FALSE	FALSE
ENSMUST00000176906	ENSMUSG00000093674	Rpl41	protein_coding	142	cds	ATG	AGA	0	-46	chr10	128548961	128548959	-	4236	50.0792	68.5684	56.8141	63.0005	38.3024	36.5182	137.821	175.462	3	3	TRUE	0	FALSE	FALSE
ENSMUST00000176906	ENSMUSG00000093674	Rpl41	protein_coding	145	cds	AGA	GCG	1	-45	chr10	128548958	128548956	-	4235	38.2022	35.0786	28.8482	56.8068	14.9814	54.8813	126.669	102.129	3	3	TRUE	0	FALSE	FALSE
ENSMUST00000170489	ENSMUSG00000032097	Ddx6	protein_coding	1809	cds	CCG	NA	482	-1	chr9	44635852	44635854	+	33657	16.4171	29.1023	27.4547	22.1926	13.2791	23.0953	58.567	72.9741	3	3	TRUE	0	FALSE	TRUE
ENSMUST00000113097	ENSMUSG00000031422	Morf4l2	protein_coding	910	cds	GCT	GAG	207	-81	chrX	136733857	136733855	-	36815	33.4269	32.3131	14.3773	28.2997	26.0933	37.4167	91.8098	80.1173	3	3	FALSE	0	FALSE	FALSE
ENSMUST00000113097	ENSMUSG00000031422	Morf4l2	protein_coding	1150	cds	CTG	NA	287	-1	chrX	136733617	136733615	-	36809	47.5618	76.4031	45.137	56.6944	35.3333	52.3897	144.417	169.102	3	3	TRUE	0	FALSE	FALSE
ENSMUST00000033797	ENSMUSG00000031422	Morf4l2	protein_coding	1081	cds	GCT	GAG	207	-81	chrX	136733857	136733855	-	36815	30.9788	37.966	18.2747	21.9586	23.1412	34.1157	79.2155	87.2196	3	3	FALSE	0	FALSE	FALSE
ENSMUST00000033797	ENSMUSG00000031422	Morf4l2	protein_coding	1321	cds	CTG	NA	287	-1	chrX	136733617	136733615	-	36809	44.6488	76.2773	38.773	57.5149	37	44.9529	139.468	159.699	3	3	TRUE	0	FALSE	FALSE
ENSMUST00000080411	ENSMUSG00000031422	Morf4l2	protein_coding	955	cds	GCT	GAG	207	-81	chrX	136733857	136733855	-	36815	27.6067	34.6146	16.9498	24.4404	27.7932	35.8164	88.05	79.171	3	3	FALSE	0	FALSE	FALSE
ENSMUST00000080411	ENSMUSG00000031422	Morf4l2	protein_coding	1195	cds	CTG	NA	287	-1	chrX	136733617	136733615	-	36809	48.5555	74.7751	40.7821	54.5774	34.9149	47.807	137.299	164.113	3	3	TRUE	0	FALSE	FALSE
ENSMUST00000164609	ENSMUSG00000031422	Morf4l2	protein_coding	1147	cds	CTG	NA	287	-1	chrX	136733617	136733615	-	36809	46.5959	71.5566	44.6957	56.8128	37.6013	52.5362	146.95	162.848	3	3	TRUE	0	FALSE	FALSE
ENSMUST00000169418	ENSMUSG00000031422	Morf4l2	protein_coding	1118	cds	CTG	NA	287	-1	chrX	136733617	136733615	-	36809	41.451	74.7033	42.6596	57.1548	33.5201	53.3417	144.017	158.814	3	3	TRUE	0	FALSE	FALSE
ENSMUST00000166478	ENSMUSG00000031422	Morf4l2	protein_coding	1056	cds	CTG	NA	287	-1	chrX	136733617	136733615	-	36809	48.9266	74.6488	40.8556	50.2685	32.2963	51.0829	133.648	164.431	3	3	TRUE	0	FALSE	FALSE
ENSMUST00000166930	ENSMUSG00000031422	Morf4l2	protein_coding	1262	cds	CTG	NA	287	-1	chrX	136733617	136733615	-	36809	44.7274	74.9895	41.4483	54.4762	36.7735	50.9805	142.23	161.165	3	3	TRUE	0	FALSE	FALSE
ENSMUST00000028938	ENSMUSG00000027447	Cst3	protein_coding	199	cds	ATG	GCC	0	-140	chr2	148875378	148875376	-	20202	85.7189	101.867	81.1478	66.82	39.979	53.35	160.149	268.734	3	3	TRUE	0	FALSE	TRUE
ENSMUST00000028938	ENSMUSG00000027447	Cst3	protein_coding	571	cds	CCC	TGG	124	-16	chr2	148872011	148872009	-	20193	69.1346	94.4158	149.806	83.641	95.0349	108.107	286.783	313.357	3	3	FALSE	0	FALSE	TRUE
ENSMUST00000028938	ENSMUSG00000027447	Cst3	protein_coding	616	cds	GCC	NA	139	-1	chr2	148871966	148871964	-	20190	51.6113	56.0266	57.514	76.0444	36.8892	50.4681	163.402	165.152	3	3	TRUE	0	FALSE	TRUE
ENSMUST00000177292	ENSMUSG00000032336	Nptn	protein_coding	1126	cds	GGA	GAG	310	-87	chr9	58643621	58643623	+	33992	21.5351	22.3537	16.1279	32.5424	16.6667	25.3346	74.5437	60.0167	3	3	FALSE	0	FALSE	FALSE
ENSMUST00000085651	ENSMUSG00000032336	Nptn	protein_coding	726	cds	GGA	GAG	194	-87	chr9	58643621	58643623	+	33992	13.362	18.8096	13.8832	26.4053	10.6052	18.033	55.0435	46.0548	3	3	FALSE	0	FALSE	FALSE
ENSMUST00000085651	ENSMUSG00000032336	Nptn	protein_coding	984	cds	AAT	NA	280	-1	chr9	58651312	58651314	+	33998	24.7741	20.1155	25.8831	19.4752	18.5608	27.2062	65.2421	70.7726	3	3	TRUE	0	FALSE	FALSE
ENSMUST00000176557	ENSMUSG00000032336	Nptn	protein_coding	612	cds	GGA	GAG	194	-83	chr9	58643621	58643623	+	33992	13.9706	22.9219	10.2	30.1761	10.7891	20.5358	61.501	47.0924	3	3	FALSE	0	FALSE	FALSE
ENSMUST00000176557	ENSMUSG00000032336	Nptn	protein_coding	858	cds	AAT	NA	276	-1	chr9	58651312	58651314	+	33998	25.1864	20.9041	25.5895	21.3999	18.8502	28.2978	68.5479	71.6799	3	3	TRUE	0	FALSE	FALSE
ENSMUST00000177064	ENSMUSG00000032336	Nptn	protein_coding	318	cds	GGA	GAG	106	-87	chr9	58643621	58643623	+	33992	18.5267	22.4438	20.8213	31.9121	14.7393	22.0842	68.7356	61.7918	3	3	FALSE	0	FALSE	FALSE
ENSMUST00000176916	ENSMUSG00000032336	Nptn	nonsense_mediated_decay	378	cds	GGA	GAG	84	-87	chr9	58643621	58643623	+	33992	16.3449	25.4938	15.6271	31.6537	11.8682	20.7682	64.2901	57.4657	3	3	FALSE	0	FALSE	FALSE
ENSMUST00000176916	ENSMUSG00000032336	Nptn	nonsense_mediated_decay	636	cds	AAT	NA	170	-1	chr9	58651312	58651314	+	33998	28.9358	21.9937	24.0827	20.3261	20.5916	31.0531	71.9708	75.0121	3	3	TRUE	0	FALSE	FALSE
ENSMUST00000176250	ENSMUSG00000032336	Nptn	protein_coding	377	cds	GGA	GAG	84	-87	chr9	58643621	58643623	+	33992	17.9498	24.3142	17.4687	31.5443	14.9209	19.8766	66.3418	59.7327	3	3	FALSE	0	FALSE	FALSE
ENSMUST00000176250	ENSMUSG00000032336	Nptn	protein_coding	635	cds	AAT	NA	170	-1	chr9	58651312	58651314	+	33998	28.1938	22.8697	26.1629	20.7064	21.0655	29.3814	71.1533	77.2265	3	3	TRUE	0	FALSE	FALSE
ENSMUST00000139715	ENSMUSG00000026229	Psmd1	nonsense_mediated_decay	171	cds	ATG	ATC	0	-48	chr1	86064789	86064791	+	1176	38.4615	38.77	17.4655	45.6605	22.5161	40.6889	108.866	94.697	3	3	TRUE	0	FALSE	FALSE
ENSMUST00000027432	ENSMUSG00000026229	Psmd1	protein_coding	171	cds	ATG	ATC	0	-953	chr1	86064789	86064791	+	1176	39.6448	34.6067	14.1988	43.1425	22.0011	44.757	109.901	88.4503	3	3	TRUE	0	FALSE	FALSE
ENSMUST00000001452	ENSMUSG00000001416	Cct3	protein_coding	1215	cds	TGC	AAA	365	-180	chr3	88318466	88318468	+	21390	21.2843	21.9847	19.7233	20.2824	16.6422	16.6404	53.5649	62.9923	3	3	FALSE	0	FALSE	FALSE
ENSMUST00000164166	ENSMUSG00000001416	Cct3	protein_coding	1043	cds	TGC	AAA	327	-180	chr3	88318466	88318468	+	21390	21.2843	21.9847	19.7233	20.2824	16.6422	16.6404	53.5649	62.9923	3	3	FALSE	0	FALSE	FALSE
ENSMUST00000168062	ENSMUSG00000001416	Cct3	protein_coding	1143	cds	TGC	AAA	365	-156	chr3	88318466	88318468	+	21390	21.2843	21.9847	19.7233	20.2824	16.6422	16.6404	53.5649	62.9923	3	3	FALSE	0	FALSE	FALSE
ENSMUST00000163735	ENSMUSG00000001416	Cct3	protein_coding	669	cds	GCA	AAG	223	-82	chr3	88318467	88318469	+	21391	20.2259	16.223	17.3592	17.5417	10.9786	17.0815	45.6017	53.8081	3	3	FALSE	0	FALSE	TRUE
ENSMUST00000006035	ENSMUSG00000005881	Ergic3	protein_coding	1242	cds	ACG	NA	382	-1	chr2	156018144	156018146	+	20392	43.7228	53.8495	19.4176	38.6622	15.0068	24.0487	77.7176	116.99	3	3	TRUE	0	FALSE	FALSE
ENSMUST00000088650	ENSMUSG00000005881	Ergic3	protein_coding	1214	cds	ACG	NA	393	-1	chr2	156018144	156018146	+	20392	43.7228	56.6868	19.4176	39.2535	16	24.0487	79.3021	119.827	3	3	TRUE	0	FALSE	FALSE
ENSMUST00000106439	ENSMUSG00000020775	Mrpl38	protein_coding	1228	cds	TAC	NA	379	-1	chr11	116132000	116131998	-	7208	31.6259	16.5391	42.0864	32.5333	21.7143	34.3404	88.5881	90.2515	3	3	TRUE	0	FALSE	TRUE
ENSMUST00000034164	ENSMUSG00000031729	Ist1	protein_coding	1175	cds	ACA	NA	361	-1	chr8	109672488	109672486	-	32665	21.3122	22.7413	32.3479	25.0424	13.9064	29.6113	68.5602	76.4013	3	3	TRUE	0	FALSE	TRUE
ENSMUST00000030903	ENSMUSG00000029036	Atad3a	protein_coding	1860	cds	TGC	NA	590	-1	chr4	155741194	155741192	-	24564	14.2715	18.1667	23.4524	17.818	11.8209	14.6071	44.246	55.8906	3	3	TRUE	0	FALSE	TRUE
ENSMUST00000166915	ENSMUSG00000090553	Snrpe	protein_coding	74	cds	ATG	GCG	0	-92	chr1	133610218	133610216	-	1584	46.6001	61.546	49.8264	53.4381	34.7755	33.5149	121.728	157.972	3	3	TRUE	0	FALSE	FALSE
ENSMUST00000166291	ENSMUSG00000090553	Snrpe	protein_coding	15	cds	ATG	GCG	0	-52	chr1	133610218	133610216	-	1584	48.5549	61.7303	52.9561	55.7528	36.8008	36.5493	129.103	163.241	3	3	TRUE	0	FALSE	FALSE
ENSMUST00000164096	ENSMUSG00000090553	Snrpe	protein_coding	32	cds	ATG	GCG	0	-91	chr1	133610218	133610216	-	1584	53.3894	68.8868	56.6138	59.8771	38.841	38.5959	137.314	178.89	3	3	TRUE	0	FALSE	FALSE
ENSMUST00000080492	ENSMUSG00000057863	Rpl36	protein_coding	35	cds	ATG	GCT	0	-105	chr17	56613429	56613431	+	15463	89.3536	78.1647	69.7114	80.0484	56.8038	45.24	182.092	237.23	3	3	TRUE	0	FALSE	TRUE
ENSMUST00000080492	ENSMUSG00000057863	Rpl36	protein_coding	104	cds	CCG	AGA	23	-82	chr17	56613635	56613637	+	15465	23.0591	24.813	28.1113	22.2618	19.6837	35.7377	77.6832	75.9834	3	3	FALSE	0	FALSE	TRUE
ENSMUST00000080492	ENSMUSG00000057863	Rpl36	protein_coding	281	cds	GCC	AAG	82	-23	chr17	56614038	56614040	+	15472	23.8902	16.9394	14.5803	34.4609	17.9263	45.0136	97.4008	55.41	3	3	FALSE	0	FALSE	TRUE
ENSMUST00000033609	ENSMUSG00000031256	Cstf2	protein_coding	1905	cds	CCT	NA	579	-1	chrX	134081307	134081309	+	36747	27.9228	27.8395	31.797	32.4167	11.1691	22.1459	65.7316	87.5594	3	3	TRUE	0	FALSE	FALSE
ENSMUST00000113287	ENSMUSG00000031256	Cstf2	protein_coding	1837	cds	CCT	NA	553	-1	chrX	134081307	134081309	+	36747	28.0814	27.8395	32	32.4167	11.2538	22.0651	65.7356	87.921	3	3	TRUE	0	FALSE	FALSE
ENSMUST00000030651	ENSMUSG00000028843	Sh3bgrl3	protein_coding	126	cds	ATG	AGT	0	-93	chr4	134128664	134128662	-	24033	44.0861	71.6743	30.5401	54.1759	16.7335	38.3667	109.276	146.3	3	3	TRUE	0	FALSE	FALSE
ENSMUST00000030651	ENSMUSG00000028843	Sh3bgrl3	protein_coding	402	cds	GCC	NA	92	-1	chr4	134127747	134127745	-	24031	40.0572	62.6917	38.8409	37.0632	12.0089	29.6318	78.7039	141.59	3	3	TRUE	0	FALSE	FALSE
ENSMUST00000105879	ENSMUSG00000028843	Sh3bgrl3	protein_coding	76	cds	ATG	AGT	0	-37	chr4	134128664	134128662	-	24033	40.2231	58.7735	28.6994	49.1093	15.4103	35.375	99.8945	127.696	3	3	TRUE	0	FALSE	FALSE
ENSMUST00000105879	ENSMUSG00000028843	Sh3bgrl3	protein_coding	184	cds	GCC	NA	36	-1	chr4	134127747	134127745	-	24031	36.4945	51.2142	36.6003	33.398	12.0089	27.23	72.6368	124.309	3	3	TRUE	0	FALSE	FALSE
ENSMUST00000026917	ENSMUSG00000025810	Nrp1	protein_coding	981	cds	ATC	CGC	235	-688	chr8	128425805	128425807	+	32966	27.2796	52.1813	17.3517	43.2747	20.4096	14.5989	78.2832	96.8126	3	3	FALSE	0	FALSE	TRUE
ENSMUST00000026917	ENSMUSG00000025810	Nrp1	protein_coding	1227	cds	GGA	GAA	317	-606	chr8	128431973	128431975	+	32968	26.8194	34.6482	38.2848	42.0381	18.5062	34.2334	94.7776	99.7524	3	3	FALSE	0	FALSE	TRUE
ENSMUST00000026917	ENSMUSG00000025810	Nrp1	protein_coding	3042	cds	GCG	NA	922	-1	chr8	128502597	128502599	+	32980	56.7322	57.3705	66.4172	66.2472	26.2194	62.1349	154.602	180.52	3	3	TRUE	0	FALSE	TRUE
ENSMUST00000009789	ENSMUSG00000019916	P4ha1	protein_coding	208	cds	ATG	ATC	0	-534	chr10	59337080	59337082	+	2785	22.969	24.7594	25.7879	21.7124	12.3094	15.6677	49.6894	73.5163	3	3	TRUE	0	FALSE	FALSE
ENSMUST00000092512	ENSMUSG00000019916	P4ha1	protein_coding	140	cds	ATG	ATC	0	-454	chr10	59337080	59337082	+	2785	22.369	24.5105	25.0984	21.4711	12.2053	15.3617	49.0381	71.978	3	3	TRUE	0	FALSE	FALSE
ENSMUST00000105466	ENSMUSG00000019916	P4ha1	protein_coding	136	cds	ATG	ATC	0	-534	chr10	59337080	59337082	+	2785	22.3201	24.1383	25.0316	21.2626	11.8956	15.1203	48.2786	71.49	3	3	TRUE	0	FALSE	FALSE
ENSMUST00000185641	ENSMUSG00000062683	Atp5g2	protein_coding	263	cds	ACA	GAT	41	-105	chr15	102665772	102665770	-	12950	18.9827	13.6273	26.1939	10.6215	15.3862	15.6632	41.671	58.8039	3	3	FALSE	0	FALSE	FALSE
ENSMUST00000185641	ENSMUSG00000062683	Atp5g2	protein_coding	575	cds	ATG	NA	145	-1	chr15	102663020	102663018	-	12944	37.5889	53.0454	46.5499	40.9386	12.1244	23.3975	76.4604	137.184	3	3	TRUE	0	FALSE	TRUE
ENSMUST00000187160	ENSMUSG00000062683	Atp5g2	protein_coding	117	cds	ACA	GAT	39	-68	chr15	102665772	102665770	-	12950	18.9827	13.6273	26.1939	10.6215	18.0077	15.6632	44.2924	58.8039	3	3	FALSE	0	FALSE	FALSE
ENSMUST00000075630	ENSMUSG00000062683	Atp5g2	protein_coding	123	cds	ACA	GAT	41	-105	chr15	102665772	102665770	-	12950	18.9827	13.6273	26.1939	10.6215	16.4874	15.6632	42.7721	58.8039	3	3	FALSE	0	FALSE	FALSE
ENSMUST00000090006	ENSMUSG00000025809	Itgb1	protein_coding	666	cds	CTA	AAA	120	-678	chr8	128710459	128710461	+	32993	13.321	14.0118	15.9533	11.8661	18.9067	21.3849	52.1576	43.2861	3	3	FALSE	0	FALSE	TRUE
ENSMUST00000090006	ENSMUSG00000025809	Itgb1	protein_coding	738	cds	CTC	TAC	144	-654	chr8	128713263	128713265	+	32999	23.4046	18.1184	34.7278	10.1163	17.0111	33.5454	60.6728	76.2508	3	3	FALSE	0	FALSE	FALSE
ENSMUST00000090006	ENSMUSG00000025809	Itgb1	protein_coding	954	cds	TTT	AGC	216	-582	chr8	128714027	128714029	+	33013	12.9313	19.8852	11.4818	10.8834	15.3202	11.84	38.0435	44.2983	3	3	FALSE	0	FALSE	TRUE
ENSMUST00000090006	ENSMUSG00000025809	Itgb1	protein_coding	990	cds	GGA	GAG	228	-570	chr8	128714063	128714065	+	33017	44.6191	36.5528	37.6633	48.1144	20.0629	42.3213	110.499	118.835	3	3	FALSE	0	FALSE	TRUE
ENSMUST00000090006	ENSMUSG00000025809	Itgb1	protein_coding	1128	cds	GTG	TTT	274	-524	chr8	128716157	128716159	+	33022	35.3496	35.608	37.1938	30.4964	15.3277	40.1415	85.9656	108.151	3	3	FALSE	0	FALSE	FALSE
ENSMUST00000090006	ENSMUSG00000025809	Itgb1	protein_coding	1263	cds	GCT	CAC	319	-479	chr8	128717221	128717223	+	33027	21.4401	15.7923	21.6831	15.4971	10.1261	16.3557	41.979	58.9155	3	3	FALSE	0	FALSE	FALSE
ENSMUST00000090006	ENSMUSG00000025809	Itgb1	protein_coding	1377	cds	GGC	ACA	357	-441	chr8	128717617	128717619	+	33036	27.9029	20.1498	42.6492	25.5791	15.6679	38.4031	79.6501	90.7018	3	3	FALSE	0	FALSE	FALSE
ENSMUST00000090006	ENSMUSG00000025809	Itgb1	protein_coding	1431	cds	AAC	TCT	375	-423	chr8	128717671	128717673	+	33040	37.976	42.3631	57.9478	44.4553	30.4654	46.6256	121.546	138.287	3	3	FALSE	0	FALSE	FALSE
ENSMUST00000090006	ENSMUSG00000025809	Itgb1	protein_coding	1479	cds	GGA	GTA	391	-407	chr8	128720036	128720038	+	33047	24.1701	15.3949	19.0681	28.1519	10.001	20.1687	58.3216	58.6331	3	3	FALSE	0	FALSE	FALSE
ENSMUST00000090006	ENSMUSG00000025809	Itgb1	protein_coding	2097	cds	CCA	TGT	597	-201	chr8	128722892	128722894	+	33076	32.1296	33.0165	26.4344	26.8985	18.5307	26.656	72.0852	91.5805	3	3	FALSE	0	FALSE	FALSE
ENSMUST00000090006	ENSMUSG00000025809	Itgb1	protein_coding	2490	cds	ATC	ATC	728	-70	chr8	128726039	128726041	+	33095	35.4125	34.1423	38.2395	28.6271	25.3944	40.6814	94.7028	107.794	3	3	FALSE	0	FALSE	FALSE
ENSMUST00000090006	ENSMUSG00000025809	Itgb1	protein_coding	2556	cds	TGG	AAA	750	-48	chr8	128726105	128726107	+	33099	39.3246	27.136	33.8236	27.7226	11.2996	22.0819	61.1041	100.284	3	3	FALSE	0	FALSE	FALSE
ENSMUST00000090006	ENSMUSG00000025809	Itgb1	protein_coding	2637	cds	GGT	GAA	777	-21	chr8	128726186	128732024	+	33108	30.5312	38.0987	30.1997	44.7725	15.8405	24.8435	85.4565	98.8295	3	3	FALSE	0	FALSE	FALSE
ENSMUST00000090006	ENSMUSG00000025809	Itgb1	protein_coding	2697	cds	AAA	NA	797	-1	chr8	128732082	128732084	+	33110	42.6504	49.0463	52.8606	53.4968	23.5318	54.9179	131.946	144.557	3	3	TRUE	0	FALSE	TRUE
ENSMUST00000124826	ENSMUSG00000025809	Itgb1	nonsense_mediated_decay	203	cds	ATG	AAT	0	-58	chr8	128685959	128705414	+	32981	23.1917	42.7913	17.3624	22.4281	15.7248	13.2635	51.4163	83.3453	3	3	TRUE	0	FALSE	FALSE
ENSMUST00000124826	ENSMUSG00000025809	Itgb1	nonsense_mediated_decay	1153	3utr	NA	NA	949	773	chr8	128720036	128720038	+	33047	11.8691	11.3363	10.7428	19.8833	13.6555	16.0401	49.5789	33.9482	3	3	FALSE	0	FALSE	FALSE
ENSMUST00000124826	ENSMUSG00000025809	Itgb1	nonsense_mediated_decay	2162	3utr	NA	NA	1958	1782	chr8	128726037	128726039	+	33094	13.5962	25.8073	16.8108	27.1383	11.2272	15.8087	54.1742	56.2143	3	3	FALSE	0	FALSE	FALSE
ENSMUST00000124826	ENSMUSG00000025809	Itgb1	nonsense_mediated_decay	2164	3utr	NA	NA	1960	1784	chr8	128726039	128726041	+	33095	19.7373	17.5935	16.0753	13.5215	21.588	11.8751	46.9847	53.406	3	3	FALSE	0	FALSE	FALSE
ENSMUST00000124826	ENSMUSG00000025809	Itgb1	nonsense_mediated_decay	2165	3utr	NA	NA	1961	1785	chr8	128726040	128726042	+	33096	27.7614	24.8877	31.9966	20.356	15.2814	36.907	72.5445	84.6456	3	3	FALSE	0	FALSE	FALSE
ENSMUST00000124826	ENSMUSG00000025809	Itgb1	nonsense_mediated_decay	2311	3utr	NA	NA	2107	1931	chr8	128726186	128732024	+	33108	13.7881	16.5788	12.7654	18.823	13.3106	13.7262	45.8598	43.1324	3	3	FALSE	0	FALSE	FALSE
ENSMUST00000124826	ENSMUSG00000025809	Itgb1	nonsense_mediated_decay	2372	3utr	NA	NA	2168	1992	chr8	128732083	128732085	+	33111	40.4635	45.1588	52.8507	52.1165	10.8963	52.1361	115.149	138.473	3	3	FALSE	0	FALSE	FALSE
ENSMUST00000124826	ENSMUSG00000025809	Itgb1	nonsense_mediated_decay	2373	3utr	NA	NA	2169	1993	chr8	128732084	128732086	+	33112	11.2933	11.5054	12.3977	12.2492	12.9657	14.4204	39.6352	35.1964	3	3	FALSE	0	FALSE	FALSE
ENSMUST00000149116	ENSMUSG00000025809	Itgb1	protein_coding	114	cds	ACA	TCA	38	-74	chr8	128726037	128726039	+	33094	26.8654	35.7342	28.0492	33.3961	25.3057	24.1835	82.8853	90.6488	3	3	FALSE	0	FALSE	FALSE
ENSMUST00000034051	ENSMUSG00000031634	Ufsp2	protein_coding	1464	cds	CTT	NA	460	-1	chr8	45996782	45996784	+	31786	10.4468	16.0806	16.6667	26.8434	51.5786	20.6033	99.0253	43.1941	3	3	TRUE	0	FALSE	TRUE
ENSMUST00000191899	ENSMUSG00000039952	Dag1	protein_coding	3031	cds	CCT	NA	892	-1	chr9	108207265	108207263	-	35012	47.1355	70.1633	33.2614	41.3453	14.126	12.5405	68.0118	150.56	3	3	TRUE	0	FALSE	FALSE
ENSMUST00000080435	ENSMUSG00000039952	Dag1	protein_coding	3043	cds	CCT	NA	892	-1	chr9	108207265	108207263	-	35012	47.0858	70.0983	33.2614	41.3345	14.1364	12.5588	68.0298	150.445	3	3	TRUE	0	FALSE	FALSE
ENSMUST00000166905	ENSMUSG00000039952	Dag1	protein_coding	2934	cds	CCT	NA	892	-1	chr9	108207265	108207263	-	35012	47.0982	70.0983	33.2252	41.3777	14.1364	12.5773	68.0914	150.422	3	3	TRUE	0	FALSE	FALSE
ENSMUST00000171412	ENSMUSG00000039952	Dag1	protein_coding	3108	cds	CCT	NA	892	-1	chr9	108207265	108207263	-	35012	47.0362	70.1894	33.2705	41.3561	14.126	12.5466	68.0288	150.496	3	3	TRUE	0	FALSE	FALSE
ENSMUST00000024906	ENSMUSG00000024098	Twsg1	protein_coding	827	cds	GGG	AGT	210	-12	chr17	65926285	65926283	-	15544	16.1481	15.1537	20.3882	35.9334	27.9545	19.799	83.6869	51.69	3	3	FALSE	0	FALSE	TRUE
ENSMUST00000109235	ENSMUSG00000039536	Stau1	protein_coding	409	cds	CCT	TTA	35	-454	chr2	166963570	166963568	-	20590	17.1459	17.4078	19.6731	17.6246	18.7639	31.6667	68.0551	54.2267	3	3	FALSE	0	FALSE	FALSE
ENSMUST00000049412	ENSMUSG00000039536	Stau1	protein_coding	234	cds	CCT	TTA	35	-450	chr2	166963570	166963568	-	20590	17.1459	17.4078	19.6731	17.6246	18.7639	31.6667	68.0551	54.2267	3	3	FALSE	0	FALSE	FALSE
ENSMUST00000109238	ENSMUSG00000039536	Stau1	protein_coding	396	cds	CCT	TTA	35	-460	chr2	166963570	166963568	-	20590	17.1459	17.4078	19.6731	17.6246	18.7639	31.6667	68.0551	54.2267	3	3	FALSE	0	FALSE	FALSE
ENSMUST00000109236	ENSMUSG00000039536	Stau1	protein_coding	430	cds	CCT	TTA	35	-452	chr2	166963570	166963568	-	20590	17.1459	17.4078	19.6731	17.6246	18.7639	31.6667	68.0551	54.2267	3	3	FALSE	0	FALSE	FALSE
ENSMUST00000184390	ENSMUSG00000039536	Stau1	nonsense_mediated_decay	163	cds	CCT	TTA	35	-401	chr2	166963570	166963568	-	20590	17.1459	17.4078	19.6731	17.6246	18.7639	31.6667	68.0551	54.2267	3	3	FALSE	0	FALSE	FALSE
ENSMUST00000109539	ENSMUSG00000020288	Ahsa2	protein_coding	1061	cds	GCT	NA	282	-1	chr11	23490404	23490402	-	4662	42.8424	73.1389	52.543	34.6482	12.7248	26.2747	73.6477	168.524	3	3	TRUE	0	FALSE	FALSE
ENSMUST00000020529	ENSMUSG00000020288	Ahsa2	protein_coding	1166	cds	GCT	NA	330	-1	chr11	23490404	23490402	-	4662	43.6356	71.9235	53.1916	34.6482	12.7248	26.2747	73.6477	168.751	3	3	TRUE	0	FALSE	FALSE
ENSMUST00000093955	ENSMUSG00000020485	Supt4a	protein_coding	396	cds	ACC	NA	116	-1	chr11	87743307	87743309	+	6223	57.1561	57.0016	50.8085	62.3523	33.2668	68.0014	163.62	164.966	3	3	TRUE	0	FALSE	FALSE
ENSMUST00000070524	ENSMUSG00000056429	Tgoln1	protein_coding	1151	cds	GGA	AAC	291	-62	chr6	72615623	72615621	-	27589	31.0166	18.563	37.1588	29.9422	17.9353	52.1151	99.9926	86.7384	3	3	FALSE	0	FALSE	TRUE
ENSMUST00000070524	ENSMUSG00000056429	Tgoln1	protein_coding	1334	cds	CTT	NA	352	-1	chr6	72612110	72614072	-	27588	27	37.0571	44.023	22.3844	13.787	27.1294	63.3008	108.08	3	3	TRUE	0	FALSE	TRUE
ENSMUST00000109256	ENSMUSG00000036167	Pphln1	protein_coding	1008	cds	TTT	NA	292	-1	chr15	93489162	93489164	+	12582	23.5	20.7307	28.4978	51.4333	13.8473	35.5851	100.866	72.7285	3	3	TRUE	0	FALSE	FALSE
ENSMUST00000049122	ENSMUSG00000036167	Pphln1	protein_coding	1225	cds	TTT	NA	380	-1	chr15	93489115	93489117	+	12581	23.5	20.7307	28.4978	52.2303	14.444	36.4366	103.111	72.7285	3	3	TRUE	0	FALSE	TRUE
ENSMUST00000068457	ENSMUSG00000036167	Pphln1	protein_coding	1015	cds	TTT	NA	311	-1	chr15	93489112	93489114	+	12580	23.5	20.7307	28.4978	51.8495	13.809	35.9611	101.62	72.7285	3	3	TRUE	0	FALSE	TRUE
ENSMUST00000165935	ENSMUSG00000036167	Pphln1	protein_coding	1137	cds	TTT	NA	292	-1	chr15	93489162	93489164	+	12582	23.5	20.7307	28.4978	51.3908	13.9506	35.5056	100.847	72.7285	3	3	TRUE	0	FALSE	FALSE
ENSMUST00000007959	ENSMUSG00000007815	Rhoa	protein_coding	835	cds	ATC	ATC	111	-82	chr9	108335106	108335108	+	35039	13.0016	18.7761	17.1702	29.6718	19.0392	29.2742	77.9852	48.9479	3	3	FALSE	0	FALSE	FALSE
ENSMUST00000194701	ENSMUSG00000007815	Rhoa	protein_coding	690	cds	ATC	ATC	111	-53	chr9	108335106	108335108	+	35039	13.0016	18.7761	17.1702	29.6718	19.0392	29.2742	77.9852	48.9479	3	3	FALSE	0	FALSE	FALSE
ENSMUST00000020107	ENSMUSG00000019943	Atp2b1	protein_coding	3638	cds	TTA	AAG	1065	-155	chr10	99018741	99018743	+	3712	27.9167	11.8392	24.0416	22.7215	10.2893	16.5202	49.5309	63.7975	3	3	FALSE	0	FALSE	TRUE
ENSMUST00000079391	ENSMUSG00000029761	Cald1	protein_coding	296	cds	ATG	GAT	0	-534	chr6	34686003	34686005	+	27181	91.1986	85.3634	65.345	82.6873	47.8398	64.4311	194.958	241.907	3	3	TRUE	0	FALSE	FALSE
ENSMUST00000079391	ENSMUSG00000029761	Cald1	protein_coding	299	cds	GAT	GAT	1	-533	chr6	34686006	34686008	+	27182	46.9189	56.8923	66.7737	43.194	24.7377	46.407	114.339	170.585	3	3	TRUE	0	FALSE	FALSE
ENSMUST00000079391	ENSMUSG00000029761	Cald1	protein_coding	521	cds	GAT	GAA	75	-459	chr6	34745625	34745627	+	27185	60.7757	64.0729	83.6522	64.7917	30.0716	49.5713	144.435	208.501	3	3	FALSE	0	FALSE	FALSE
ENSMUST00000079391	ENSMUSG00000029761	Cald1	protein_coding	629	cds	CAG	GAA	111	-423	chr6	34745733	34745735	+	27186	41.4744	40.083	38.8545	40.0395	35.2404	43.6307	118.911	120.412	3	3	FALSE	0	FALSE	FALSE
ENSMUST00000079391	ENSMUSG00000029761	Cald1	protein_coding	1442	cds	GGC	TCG	382	-152	chr6	34758109	34758111	+	27214	24.3665	22.2185	46.9967	20.4411	12.9923	21.123	54.5564	93.5816	3	3	FALSE	0	FALSE	FALSE
ENSMUST00000079391	ENSMUSG00000029761	Cald1	protein_coding	1781	cds	GAT	GGC	495	-39	chr6	34766165	34766167	+	27224	69.4086	72.4229	84.0721	85.1873	42.5914	84.8003	212.579	225.904	3	3	FALSE	0	FALSE	FALSE
ENSMUST00000079391	ENSMUSG00000029761	Cald1	protein_coding	1895	cds	GTC	NA	533	-1	chr6	34771128	34773224	+	27230	68.1551	93.584	58.5757	58.9105	16.1999	29.0566	104.167	220.315	3	3	TRUE	0	FALSE	FALSE
ENSMUST00000142512	ENSMUSG00000029761	Cald1	protein_coding	195	cds	ATG	GAT	0	-253	chr6	34686003	34686005	+	27181	91.1986	85.3634	65.345	82.6873	47.8398	64.4311	194.958	241.907	3	3	TRUE	0	FALSE	FALSE
ENSMUST00000142512	ENSMUSG00000029761	Cald1	protein_coding	198	cds	GAT	GAT	1	-252	chr6	34686006	34686008	+	27182	46.9189	56.8923	66.7737	43.194	24.7377	46.407	114.339	170.585	3	3	TRUE	0	FALSE	FALSE
ENSMUST00000142512	ENSMUSG00000029761	Cald1	protein_coding	420	cds	GAT	GAA	75	-178	chr6	34745625	34745627	+	27185	57.3901	68.1681	83.9583	65.511	30.772	51.3216	147.605	209.517	3	3	FALSE	0	FALSE	FALSE
ENSMUST00000142512	ENSMUSG00000029761	Cald1	protein_coding	528	cds	CAG	GAA	111	-142	chr6	34745733	34745735	+	27186	45.4754	47.8314	43.6634	39.4487	42.6707	51.9551	134.075	136.97	3	3	FALSE	0	FALSE	FALSE
ENSMUST00000115027	ENSMUSG00000029761	Cald1	protein_coding	103	5utr	NA	NA	-130	-2436	chr6	34662128	34662130	+	27174	36.8498	41.1061	31.1118	24.5114	12.5818	15.8826	52.9758	109.068	3	3	FALSE	0	FALSE	FALSE
ENSMUST00000115027	ENSMUSG00000029761	Cald1	protein_coding	232	cds	ATG	GAT	0	-768	chr6	34686003	34686005	+	27181	91.1986	85.3634	65.345	82.6873	47.8398	64.4311	194.958	241.907	3	3	TRUE	0	FALSE	FALSE
ENSMUST00000115027	ENSMUSG00000029761	Cald1	protein_coding	235	cds	GAT	GAT	1	-767	chr6	34686006	34686008	+	27182	46.9189	56.8923	66.7737	43.194	24.7377	46.407	114.339	170.585	3	3	TRUE	0	FALSE	FALSE
ENSMUST00000115027	ENSMUSG00000029761	Cald1	protein_coding	457	cds	GAT	GAA	75	-693	chr6	34745625	34745627	+	27185	58.6536	71.5825	89.6294	62.0701	28.2169	54.5774	144.864	219.865	3	3	FALSE	0	FALSE	FALSE
ENSMUST00000115027	ENSMUSG00000029761	Cald1	protein_coding	565	cds	CAG	GAA	111	-657	chr6	34745733	34745735	+	27186	47.585	48.9254	47.9668	44.7282	40.3051	51.0453	136.079	144.477	3	3	FALSE	0	FALSE	FALSE
ENSMUST00000115027	ENSMUSG00000029761	Cald1	protein_coding	2080	cds	GGC	TCG	616	-152	chr6	34758109	34758111	+	27214	24.0139	19.9281	50.1336	22.0368	11.5388	22.026	55.6016	94.0756	3	3	FALSE	0	FALSE	FALSE
ENSMUST00000115027	ENSMUSG00000029761	Cald1	protein_coding	2419	cds	GAT	GGC	729	-39	chr6	34766165	34766167	+	27224	70.7997	72.9531	91.5823	84.9612	41.5333	82.3387	208.833	235.335	3	3	FALSE	0	FALSE	FALSE
ENSMUST00000115027	ENSMUSG00000029761	Cald1	protein_coding	2422	cds	GGC	AAC	730	-38	chr6	34766168	34766170	+	27225	24.0544	31.6253	15.836	33.7195	14.7503	28.0824	76.5522	71.5157	3	3	FALSE	0	FALSE	FALSE
ENSMUST00000115027	ENSMUSG00000029761	Cald1	protein_coding	2533	cds	GTC	NA	767	-1	chr6	34771128	34773224	+	27230	67.7758	95.2982	59.6185	61.0008	19.1667	29.8635	110.031	222.693	3	3	TRUE	0	FALSE	FALSE
ENSMUST00000115026	ENSMUSG00000029761	Cald1	protein_coding	231	cds	ATG	GAT	0	-536	chr6	34686003	34686005	+	27181	91.1986	85.3634	65.345	82.6873	47.8398	64.4311	194.958	241.907	3	3	TRUE	0	FALSE	FALSE
ENSMUST00000115026	ENSMUSG00000029761	Cald1	protein_coding	234	cds	GAT	GAT	1	-535	chr6	34686006	34686008	+	27182	46.9189	56.8923	66.7737	43.194	24.7377	46.407	114.339	170.585	3	3	TRUE	0	FALSE	FALSE
ENSMUST00000115026	ENSMUSG00000029761	Cald1	protein_coding	456	cds	GAT	GAA	75	-461	chr6	34745625	34745627	+	27185	55.3409	69.8337	88.0392	66.1042	31.7465	54.2411	152.092	213.214	3	3	FALSE	0	FALSE	FALSE
ENSMUST00000115026	ENSMUSG00000029761	Cald1	protein_coding	564	cds	CAG	GAA	111	-425	chr6	34745733	34745735	+	27186	44.816	41.0856	38.0895	37.4718	35.9999	44.3139	117.786	123.991	3	3	FALSE	0	FALSE	FALSE
ENSMUST00000115026	ENSMUSG00000029761	Cald1	protein_coding	1383	cds	GGC	TCG	384	-152	chr6	34758109	34758111	+	27214	27.0103	21.4287	51.1745	19.5554	14.2813	20.4379	54.2746	99.6135	3	3	FALSE	0	FALSE	FALSE
ENSMUST00000115026	ENSMUSG00000029761	Cald1	protein_coding	1722	cds	GAT	GGC	497	-39	chr6	34766165	34766167	+	27224	65.9658	70.4779	86.8607	86.7088	41.6999	79.1192	207.528	223.304	3	3	FALSE	0	FALSE	FALSE
ENSMUST00000115026	ENSMUSG00000029761	Cald1	protein_coding	1725	cds	GGC	AAC	498	-38	chr6	34766168	34766170	+	27225	24.9144	32.0447	16.1189	33.0179	14.7524	28.7784	76.5487	73.078	3	3	FALSE	0	FALSE	FALSE
ENSMUST00000115026	ENSMUSG00000029761	Cald1	protein_coding	1836	cds	GTC	NA	535	-1	chr6	34771128	34773224	+	27230	71.2872	92.7221	59.8316	57.5616	17.4457	29.4097	104.417	223.841	3	3	TRUE	0	FALSE	FALSE
ENSMUST00000115021	ENSMUSG00000029761	Cald1	protein_coding	410	cds	GAT	GAA	69	-461	chr6	34745625	34745627	+	27185	62.4749	71.0362	80.3296	69.4562	31.2773	52.021	152.754	213.841	3	3	FALSE	0	FALSE	FALSE
ENSMUST00000115021	ENSMUSG00000029761	Cald1	protein_coding	518	cds	CAG	GAA	105	-425	chr6	34745733	34745735	+	27186	40.572	45.66	40.444	37.9186	35.499	45.9739	119.391	126.676	3	3	FALSE	0	FALSE	FALSE
ENSMUST00000115021	ENSMUSG00000029761	Cald1	protein_coding	1337	cds	GGC	TCG	378	-152	chr6	34758109	34758111	+	27214	22.2058	21.1089	50.9618	22.8554	12.9636	21.8999	57.7189	94.2764	3	3	FALSE	0	FALSE	FALSE
ENSMUST00000115021	ENSMUSG00000029761	Cald1	protein_coding	1676	cds	GAT	GGC	491	-39	chr6	34766165	34766167	+	27224	68.0521	72.6054	89.2028	83.956	41.3238	84.0795	209.359	229.86	3	3	FALSE	0	FALSE	FALSE
ENSMUST00000115021	ENSMUSG00000029761	Cald1	protein_coding	1679	cds	GGC	AAC	492	-38	chr6	34766168	34766170	+	27225	24.3618	32.3405	16.568	35.6202	15.667	27.9024	79.1896	73.2703	3	3	FALSE	0	FALSE	FALSE
ENSMUST00000149009	ENSMUSG00000029761	Cald1	nonsense_mediated_decay	362	cds	GAT	GAA	69	-465	chr6	34745625	34745627	+	27185	60.6756	68.2648	88.5651	65.2357	31.7334	52.9174	149.887	217.505	3	3	FALSE	0	FALSE	FALSE
ENSMUST00000149009	ENSMUSG00000029761	Cald1	nonsense_mediated_decay	470	cds	CAG	GAA	105	-429	chr6	34745733	34745735	+	27186	45.6	44.0494	48.5528	40.8973	43.8333	54.2563	138.987	138.202	3	3	FALSE	0	FALSE	FALSE
ENSMUST00000149009	ENSMUSG00000029761	Cald1	nonsense_mediated_decay	1283	cds	GGC	TCG	376	-158	chr6	34758109	34758111	+	27214	26.2843	22.1426	50.8421	23.5329	12.494	23.1092	59.1362	99.269	3	3	FALSE	0	FALSE	FALSE
ENSMUST00000149009	ENSMUSG00000029761	Cald1	nonsense_mediated_decay	1622	cds	GAT	GGC	489	-45	chr6	34766165	34766167	+	27224	86.1893	111.717	98.0319	96.5034	65.2998	102.652	264.455	295.938	3	3	FALSE	0	FALSE	FALSE
ENSMUST00000149009	ENSMUSG00000029761	Cald1	nonsense_mediated_decay	1625	cds	GGC	AAC	490	-44	chr6	34766168	34766170	+	27225	25.4521	31.8386	15.533	33.6078	14.4494	27.9998	76.057	72.8238	3	3	FALSE	0	FALSE	FALSE
ENSMUST00000031775	ENSMUSG00000029761	Cald1	protein_coding	218	cds	GAT	GAA	69	-485	chr6	34745625	34745627	+	27185	62.1667	69.1879	81.9397	62.8055	34.2602	53.5935	150.659	213.294	3	3	FALSE	0	FALSE	FALSE
ENSMUST00000031775	ENSMUSG00000029761	Cald1	protein_coding	326	cds	CAG	GAA	105	-449	chr6	34745733	34745735	+	27186	47.4766	42.7621	46.3464	41.3997	40.2715	48.9501	130.621	136.585	3	3	FALSE	0	FALSE	FALSE
ENSMUST00000031775	ENSMUSG00000029761	Cald1	protein_coding	1217	cds	GGC	TCG	402	-152	chr6	34758109	34758111	+	27214	24.9856	20.8601	44.4675	20.6138	11.8008	21.0561	53.4708	90.3132	3	3	FALSE	0	FALSE	FALSE
ENSMUST00000031775	ENSMUSG00000029761	Cald1	protein_coding	1556	cds	GAT	GGC	515	-39	chr6	34766165	34766167	+	27224	68.6985	69.0255	89.9243	85.1196	42.6401	83.4421	211.202	227.648	3	3	FALSE	0	FALSE	FALSE
ENSMUST00000031775	ENSMUSG00000029761	Cald1	protein_coding	1559	cds	GGC	AAC	516	-38	chr6	34766168	34766170	+	27225	24.5054	33.3972	15.6937	35.5401	15.0153	26.6533	77.2087	73.5963	3	3	FALSE	0	FALSE	FALSE
ENSMUST00000031775	ENSMUSG00000029761	Cald1	protein_coding	1670	cds	GTC	NA	553	-1	chr6	34771128	34773224	+	27230	67.4785	93.4044	61.7095	59.1659	17.5458	30.375	107.087	222.592	3	3	TRUE	0	FALSE	FALSE
ENSMUST00000142716	ENSMUSG00000029761	Cald1	protein_coding	792	cds	GCT	CGT	264	-9	chr6	34758110	34758112	+	27215	27.7829	19.3163	51.9816	29.142	12.1972	23.9423	65.2815	99.0807	3	3	FALSE	0	FALSE	TRUE
ENSMUST00000087871	ENSMUSG00000027523	Gnas	protein_coding	2362	cds	ATG	GGC	0	-394	chr2	174330295	174330297	+	20653	64.2607	47.3289	24.5804	91.7318	14.0028	38.0448	143.779	136.17	3	3	TRUE	0	FALSE	FALSE
ENSMUST00000109085	ENSMUSG00000027523	Gnas	protein_coding	290	cds	ATG	GGC	0	-380	chr2	174330295	174330297	+	20653	61.3664	46.0043	24.1131	91.7318	14.0028	37.4784	143.213	131.484	3	3	TRUE	0	FALSE	FALSE
ENSMUST00000109084	ENSMUSG00000027523	Gnas	protein_coding	199	cds	ATG	GGC	0	-379	chr2	174330295	174330297	+	20653	63.5868	46.3735	25.4053	94.2054	15.2053	37.2029	146.614	135.366	3	3	TRUE	0	FALSE	FALSE
ENSMUST00000109087	ENSMUSG00000027523	Gnas	protein_coding	207	cds	ATG	GGC	0	-394	chr2	174330295	174330297	+	20653	66.4007	46.188	23.8121	91.1409	14.381	40.5439	146.066	136.401	3	3	TRUE	0	FALSE	FALSE
ENSMUST00000034973	ENSMUSG00000032402	Smad3	protein_coding	1589	cds	TCT	NA	424	-1	chr9	63650268	63650266	-	34149	28.6081	36.6012	17.9196	40.5175	19.5282	24.9996	85.0453	83.1288	3	3	TRUE	0	FALSE	TRUE
ENSMUST00000082429	ENSMUSG00000063856	Gpx1	protein_coding	259	cds	ATG	TGT	0	-201	chr9	108339312	108339314	+	35047	43.2349	59.4305	52.5151	47.1731	13.5292	11.1559	71.8583	155.181	3	3	TRUE	0	FALSE	TRUE
ENSMUST00000082429	ENSMUSG00000063856	Gpx1	protein_coding	394	cds	CTC	TGA	45	-156	chr9	108339447	108339449	+	35057	96.2492	130.731	97.0359	92.5493	25.6764	57.0857	175.311	324.016	3	3	FALSE	0	FALSE	TRUE
ENSMUST00000191997	ENSMUSG00000063856	Gpx1	protein_coding	206	5utr	NA	NA	-33	-467	chr9	108339448	108339450	+	35058	97.5652	144.052	90.0638	92.9445	26.5922	57.9887	177.525	331.681	3	3	FALSE	0	FALSE	FALSE
ENSMUST00000191997	ENSMUSG00000063856	Gpx1	protein_coding	207	5utr	NA	NA	-32	-466	chr9	108339449	108339451	+	35059	37.6899	29.3689	58.7734	39.7983	12.0208	33.6012	85.4204	125.832	3	3	FALSE	0	FALSE	FALSE
ENSMUST00000193987	ENSMUSG00000063856	Gpx1	protein_coding	69	5utr	NA	NA	-33	-470	chr9	108339448	108339450	+	35058	149.63	228.116	152.381	142.482	39.216	91.4476	273.146	530.127	3	3	FALSE	0	FALSE	FALSE
ENSMUST00000193987	ENSMUSG00000063856	Gpx1	protein_coding	70	5utr	NA	NA	-32	-469	chr9	108339449	108339451	+	35059	42.4749	39.1025	63.95	53.4423	19.2097	37.7517	110.404	145.527	3	3	FALSE	0	FALSE	FALSE
ENSMUST00000035237	ENSMUSG00000032612	Usp4	protein_coding	2948	cds	AAC	NA	961	-1	chr9	108391831	108391833	+	35076	17.2593	25.0546	38.522	18.8741	13.1587	10.3419	42.3748	80.8359	3	3	TRUE	0	FALSE	FALSE
ENSMUST00000194959	ENSMUSG00000032612	Usp4	protein_coding	2747	cds	AAC	NA	914	-1	chr9	108391831	108391833	+	35076	17.1485	25.1	38.6492	18.826	13.0877	10.4213	42.3351	80.8977	3	3	TRUE	0	FALSE	FALSE
ENSMUST00000193288	ENSMUSG00000032612	Usp4	protein_coding	1074	cds	TTT	CTC	358	-35	chr9	108384896	108384898	+	35072	22.172	24.605	16.8855	24.2956	18.7674	15.2798	58.3428	63.6626	3	3	FALSE	0	FALSE	FALSE
ENSMUST00000195608	ENSMUSG00000032612	Usp4	protein_coding	462	cds	TTT	CTC	154	-35	chr9	108384896	108384898	+	35072	22.172	24.605	16.8855	24.2956	18.7674	15.2798	58.3428	63.6626	3	3	FALSE	0	FALSE	FALSE
ENSMUST00000102814	ENSMUSG00000028495	Rps6	protein_coding	86	cds	ATG	AAG	0	-249	chr4	86857327	86857325	-	23309	31.7929	32.5145	15.4438	28.1858	37.3164	16.9321	82.4342	79.7512	3	3	TRUE	0	FALSE	TRUE
ENSMUST00000102814	ENSMUSG00000028495	Rps6	protein_coding	164	cds	TTC	TAT	26	-223	chr4	86856788	86856786	-	23307	34.2368	34.6159	37.9402	67.2876	28.4816	48.5207	144.29	106.793	3	3	FALSE	0	FALSE	TRUE
ENSMUST00000102814	ENSMUSG00000028495	Rps6	protein_coding	614	cds	CAG	CGA	176	-73	chr4	86854924	86854922	-	23297	22.2923	20.446	28.6044	13.1309	12.1244	21.356	46.6113	71.3428	3	3	FALSE	0	FALSE	TRUE
ENSMUST00000102814	ENSMUSG00000028495	Rps6	protein_coding	656	cds	CGT	ATT	190	-59	chr4	86854882	86854880	-	23295	19.4494	12.9259	30.2588	40.8919	25.2591	47.0217	113.173	62.6342	3	3	FALSE	0	FALSE	TRUE
ENSMUST00000023510	ENSMUSG00000022814	Umps	protein_coding	1497	cds	CAG	NA	480	-1	chr16	33956769	33956767	-	13538	16.8098	24.1928	17.7635	15.925	14.9396	25.1878	56.0523	58.7661	3	3	TRUE	0	FALSE	TRUE
ENSMUST00000179234	ENSMUSG00000059343	Aldoart1	protein_coding	951	cds	CAG	AAA	241	-123	chr4	72851682	72851680	-	23258	31.1447	22.0946	22.3335	32.2276	13.6718	35.7943	81.6937	75.5728	3	3	FALSE	0	FALSE	FALSE
ENSMUST00000179234	ENSMUSG00000059343	Aldoart1	protein_coding	957	cds	TTT	TCC	243	-121	chr4	72851676	72851674	-	23256	14.7297	24.2212	25.0426	24.1428	21.8529	13.2327	59.2285	63.9935	3	3	FALSE	0	FALSE	FALSE
ENSMUST00000179234	ENSMUSG00000059343	Aldoart1	protein_coding	1062	cds	GAG	GCA	278	-86	chr4	72851571	72851569	-	23254	24.2263	40.3441	21.4305	21.4016	25.5094	30.5741	77.4851	86.0008	3	3	FALSE	0	FALSE	FALSE
ENSMUST00000179234	ENSMUSG00000059343	Aldoart1	protein_coding	1116	cds	GCC	TTG	296	-68	chr4	72851517	72851515	-	23251	12.8712	15.7483	23.3294	21.2346	19.8861	10.0779	51.1986	51.9489	3	3	FALSE	0	FALSE	FALSE
ENSMUST00000179234	ENSMUSG00000059343	Aldoart1	protein_coding	1248	cds	GGA	AAG	340	-24	chr4	72851385	72851383	-	23250	36.3931	30.5381	29.4114	35.9338	12.7611	31.4727	80.1676	96.3426	3	3	FALSE	0	FALSE	FALSE
ENSMUST00000179234	ENSMUSG00000059343	Aldoart1	protein_coding	1311	cds	CAT	GCC	361	-3	chr4	72851322	72851320	-	23248	36.3113	39.0201	24.3518	28.6436	29.9422	47.2819	105.868	99.6832	3	3	FALSE	0	FALSE	FALSE
ENSMUST00000078617	ENSMUSG00000059343	Aldoart1	protein_coding	953	cds	CAG	AAA	296	-123	chr4	72851682	72851680	-	23258	31.1447	22.0946	22.3335	32.2276	13.6718	35.7943	81.6937	75.5728	3	3	FALSE	0	FALSE	FALSE
ENSMUST00000078617	ENSMUSG00000059343	Aldoart1	protein_coding	959	cds	TTT	TCC	298	-121	chr4	72851676	72851674	-	23256	14.7297	24.2212	25.0426	24.1428	21.8529	13.2327	59.2285	63.9935	3	3	FALSE	0	FALSE	FALSE
ENSMUST00000078617	ENSMUSG00000059343	Aldoart1	protein_coding	1064	cds	GAG	GCA	333	-86	chr4	72851571	72851569	-	23254	24.2263	43.7826	21.4305	21.4016	27.8502	33.0068	82.2586	89.4394	3	3	FALSE	0	FALSE	FALSE
ENSMUST00000078617	ENSMUSG00000059343	Aldoart1	protein_coding	1118	cds	GCC	TTG	351	-68	chr4	72851517	72851515	-	23251	12.8712	15.7483	25.0096	21.2346	19.8861	10.0779	51.1986	53.629	3	3	FALSE	0	FALSE	FALSE
ENSMUST00000078617	ENSMUSG00000059343	Aldoart1	protein_coding	1250	cds	GGA	AAG	395	-24	chr4	72851385	72851383	-	23250	39.5861	33.2349	31.4591	38.6284	14.0668	33.9681	86.6633	104.28	3	3	FALSE	0	FALSE	FALSE
ENSMUST00000078617	ENSMUSG00000059343	Aldoart1	protein_coding	1313	cds	CAT	GCC	416	-3	chr4	72851322	72851320	-	23248	36.3113	39.0201	24.3518	28.6436	29.9422	47.2819	105.868	99.6832	3	3	FALSE	0	FALSE	FALSE
ENSMUST00000036928	ENSMUSG00000038776	Ephx1	protein_coding	148	cds	ATG	TGG	0	-455	chr1	181001982	181001980	-	2276	19.7765	16.5105	23.3263	27.3333	19.9333	19.7115	66.9782	59.6133	3	3	TRUE	0	FALSE	FALSE
ENSMUST00000111068	ENSMUSG00000038776	Ephx1	protein_coding	148	cds	ATG	TGG	0	-441	chr1	181001982	181001980	-	2276	19.7765	16.5105	23.5033	27.3333	19.9333	19.7115	66.9782	59.7904	3	3	TRUE	0	FALSE	FALSE
ENSMUST00000043843	ENSMUSG00000038366	Lasp1	protein_coding	1015	cds	ATC	NA	262	-1	chr11	97836239	97836241	+	6609	84.1169	84.7291	83.6396	77.7658	36.4879	52.9009	167.155	252.486	3	3	TRUE	0	FALSE	TRUE
ENSMUST00000038446	ENSMUSG00000034868	Myl12b	protein_coding	913	cds	CGC	ATC	160	-12	chr17	70974260	70974258	-	15573	17.9633	14.7423	19.5962	12.0591	10.1403	19.248	41.4475	52.3017	3	3	FALSE	0	FALSE	TRUE
ENSMUST00000148960	ENSMUSG00000024048	Myl12a	protein_coding	462	cds	ATG	TCT	0	-172	chr17	70996881	70996879	-	15589	137.872	180.135	151.25	119.487	91.831	94.6755	305.994	469.257	3	3	TRUE	0	FALSE	FALSE
ENSMUST00000148960	ENSMUSG00000024048	Myl12a	protein_coding	555	cds	CAG	GAG	31	-141	chr17	70996788	70996786	-	15588	28.9496	19.6217	22.8265	28.0882	13.32	16.5169	57.9251	71.3977	3	3	FALSE	0	FALSE	FALSE
ENSMUST00000148960	ENSMUSG00000024048	Myl12a	protein_coding	816	cds	CAG	GAG	118	-54	chr17	70994777	70994775	-	15583	23.2121	20.9688	32.8779	12.7527	11.759	21.8955	46.4072	77.0588	3	3	FALSE	0	FALSE	FALSE
ENSMUST00000024846	ENSMUSG00000024048	Myl12a	protein_coding	143	cds	ATG	TCT	0	-172	chr17	70996881	70996879	-	15589	132.238	176.501	150.407	116.213	90.8307	94.8284	301.872	459.146	3	3	TRUE	0	FALSE	FALSE
ENSMUST00000024846	ENSMUSG00000024048	Myl12a	protein_coding	236	cds	CAG	GAG	31	-141	chr17	70996788	70996786	-	15588	27.4639	23.6686	26.6045	24.3962	16.0421	15.8548	56.2932	77.737	3	3	FALSE	0	FALSE	FALSE
ENSMUST00000024846	ENSMUSG00000024048	Myl12a	protein_coding	326	cds	GGA	AAA	61	-111	chr17	70996271	70996697	-	15586	32.3639	30.7759	37.9692	24.6794	26.2517	34.7278	85.6589	101.109	3	3	FALSE	0	FALSE	FALSE
ENSMUST00000024846	ENSMUSG00000024048	Myl12a	protein_coding	497	cds	CAG	GAG	118	-54	chr17	70994777	70994775	-	15583	22.4129	22.4502	31.7564	12.2694	10.2651	20.4839	43.0185	76.6195	3	3	FALSE	0	FALSE	FALSE
ENSMUST00000024846	ENSMUSG00000024048	Myl12a	protein_coding	623	cds	CGC	ATC	160	-12	chr17	70994651	70994649	-	15580	16.9744	15.9816	19.5439	10.2281	12.8036	14.8773	37.9089	52.4999	3	3	FALSE	0	FALSE	FALSE
ENSMUST00000123686	ENSMUSG00000024048	Myl12a	protein_coding	222	cds	ATG	TCT	0	-172	chr17	70996881	70996879	-	15589	134.65	179.051	152.55	126.226	93.2954	95.5013	315.022	466.251	3	3	TRUE	0	FALSE	FALSE
ENSMUST00000123686	ENSMUSG00000024048	Myl12a	protein_coding	315	cds	CAG	GAG	31	-141	chr17	70996788	70996786	-	15588	25.7033	21.6076	24.3118	28.9241	11.5696	16.6952	57.1888	71.6227	3	3	FALSE	0	FALSE	FALSE
ENSMUST00000123686	ENSMUSG00000024048	Myl12a	protein_coding	405	cds	GGA	AAA	61	-111	chr17	70996271	70996697	-	15586	36.0956	28.7858	38.6203	27.3377	24.6608	34.9567	86.9552	103.502	3	3	FALSE	0	FALSE	FALSE
ENSMUST00000150456	ENSMUSG00000024048	Myl12a	protein_coding	341	cds	ATG	TCT	0	-106	chr17	70996881	70996879	-	15589	136.822	179.085	150.99	130.15	84.8632	91.9392	306.952	466.897	3	3	TRUE	0	FALSE	FALSE
ENSMUST00000150456	ENSMUSG00000024048	Myl12a	protein_coding	434	cds	CAG	GAG	31	-75	chr17	70996788	70996786	-	15588	31.0332	27.9134	29.8954	29.9458	21.1366	19.2444	70.3268	88.842	3	3	FALSE	0	FALSE	FALSE
ENSMUST00000150456	ENSMUSG00000024048	Myl12a	protein_coding	524	cds	GGA	AAA	61	-45	chr17	70996271	70996697	-	15586	33.7003	30.5461	37.8617	25.1938	32.3885	35.82	93.4023	102.108	3	3	FALSE	0	FALSE	FALSE
ENSMUST00000128179	ENSMUSG00000024048	Myl12a	protein_coding	273	cds	ATG	TCT	0	-57	chr17	70996881	70996879	-	15589	135.382	182.831	149.105	120.143	94.299	89.0592	303.501	467.317	3	3	TRUE	0	FALSE	FALSE
ENSMUST00000128179	ENSMUSG00000024048	Myl12a	protein_coding	366	cds	CAG	GAG	31	-26	chr17	70996788	70996786	-	15588	27.1518	23.6916	23.3118	28.4296	16.8043	15.9504	61.1844	74.1552	3	3	FALSE	0	FALSE	FALSE
ENSMUST00000029652	ENSMUSG00000028019	Pdgfc	protein_coding	1483	cds	GGA	TTC	154	-191	chr3	81174963	81174965	+	21289	23.381	31.8198	25.0453	39.7157	16	19.7262	75.4419	80.2461	3	3	FALSE	0	FALSE	TRUE
ENSMUST00000118152	ENSMUSG00000009575	Cbx5	protein_coding	130	cds	ATG	GGA	0	-191	chr15	103213209	103213207	-	12954	36.2231	29.9558	31.1031	43.2505	24.6586	37.4282	105.337	97.282	3	3	TRUE	0	FALSE	FALSE
ENSMUST00000118152	ENSMUSG00000009575	Cbx5	protein_coding	565	cds	GAT	GAA	145	-46	chr15	103199782	103199780	-	12952	22.1079	32.4526	28.0574	46.2875	18.6445	32.3397	97.2718	82.6179	3	3	FALSE	0	FALSE	FALSE
ENSMUST00000108813	ENSMUSG00000009575	Cbx5	protein_coding	131	cds	ATG	GGA	0	-191	chr15	103213209	103213207	-	12954	36.2231	29.9558	31.1031	43.2505	24.6586	37.4282	105.337	97.282	3	3	TRUE	0	FALSE	FALSE
ENSMUST00000108813	ENSMUSG00000009575	Cbx5	protein_coding	566	cds	GAT	GAA	145	-46	chr15	103199782	103199780	-	12952	22.1079	32.4526	28.0574	46.2875	18.6445	32.3397	97.2718	82.6179	3	3	FALSE	0	FALSE	FALSE
ENSMUST00000122182	ENSMUSG00000009575	Cbx5	protein_coding	184	cds	ATG	GGA	0	-191	chr15	103213209	103213207	-	12954	36.2231	29.9558	31.1031	43.2505	24.6586	37.4282	105.337	97.282	3	3	TRUE	0	FALSE	FALSE
ENSMUST00000122182	ENSMUSG00000009575	Cbx5	protein_coding	619	cds	GAT	GAA	145	-46	chr15	103199782	103199780	-	12952	22.1079	32.4526	28.0574	46.2875	18.6445	32.3397	97.2718	82.6179	3	3	FALSE	0	FALSE	FALSE
ENSMUST00000127191	ENSMUSG00000009575	Cbx5	protein_coding	249	cds	ATG	GGA	0	-41	chr15	103213209	103213207	-	12954	36.2231	32.9678	31.1031	44.1834	24.6586	37.4282	106.27	100.294	3	3	TRUE	0	FALSE	FALSE
ENSMUST00000080152	ENSMUSG00000063412	Gm10131	protein_coding	35	cds	ATG	TCT	0	-104	chr8	34111702	34111700	-	31624	28.6714	24.7819	21.2058	27.2088	21.909	18.681	67.7988	74.659	3	3	TRUE	0	FALSE	TRUE
ENSMUST00000080152	ENSMUSG00000063412	Gm10131	protein_coding	344	cds	AAG	NA	103	-1	chr8	34111393	34111391	-	31614	18.7187	16.9631	15.325	20.7281	14.5376	17.2493	52.515	51.0069	3	3	TRUE	0	FALSE	TRUE
ENSMUST00000021148	ENSMUSG00000020794	Ube2g1	protein_coding	814	cds	GAG	NA	169	-1	chr11	72679449	72679451	+	5746	16.8421	14.6828	18.1735	13.2853	10	11.6538	34.9391	49.6984	3	3	TRUE	0	FALSE	FALSE
ENSMUST00000036004	ENSMUSG00000046434	Hnrnpa1	protein_coding	82	cds	ATG	TCT	0	-373	chr15	103240513	103240515	+	12958	83.9948	95.4381	97.5281	122.731	52.8427	65.8473	241.421	276.961	3	3	TRUE	0	FALSE	TRUE
ENSMUST00000036004	ENSMUSG00000046434	Hnrnpa1	protein_coding	382	cds	CAC	TTA	100	-273	chr15	103241923	103241925	+	12970	10.3787	17.9258	12.025	17.9499	10.987	10.4488	39.3857	40.3294	3	3	FALSE	0	FALSE	TRUE
ENSMUST00000036004	ENSMUSG00000046434	Hnrnpa1	protein_coding	439	cds	CAC	CTA	119	-254	chr15	103241980	103241982	+	12976	19.5357	16.6835	28.8231	18.3927	10.858	20.9778	50.2285	65.0423	3	3	FALSE	0	FALSE	TRUE
ENSMUST00000036004	ENSMUSG00000046434	Hnrnpa1	protein_coding	1030	cds	GGC	AAT	316	-57	chr15	103243662	103243664	+	12988	24.1229	23.0807	43.0537	30.4751	22.2707	34.63	87.3758	90.2572	3	3	FALSE	0	FALSE	TRUE
ENSMUST00000036004	ENSMUSG00000046434	Hnrnpa1	protein_coding	1198	cds	TTC	NA	372	-1	chr15	103244008	103244010	+	12998	29.8497	44.4341	18.4149	39.9293	38.1802	30.6161	108.726	92.6987	3	3	TRUE	0	FALSE	TRUE
ENSMUST00000087351	ENSMUSG00000046434	Hnrnpa1	protein_coding	60	cds	ATG	TCT	0	-320	chr15	103240491	103240493	+	12957	83.9948	95.4381	97.5281	122.731	52.8427	65.8473	241.421	276.961	3	3	TRUE	0	FALSE	TRUE
ENSMUST00000087351	ENSMUSG00000046434	Hnrnpa1	protein_coding	360	cds	CAC	TTA	100	-220	chr15	103241591	103241903	+	12968	10.3787	17.9258	12.025	17.9499	10.987	10.4488	39.3857	40.3294	3	3	FALSE	0	FALSE	TRUE
ENSMUST00000087351	ENSMUSG00000046434	Hnrnpa1	protein_coding	417	cds	CAC	CTA	119	-201	chr15	103241958	103241960	+	12972	19.5357	16.6835	28.8231	18.3927	10.858	20.9778	50.2285	65.0423	3	3	FALSE	0	FALSE	TRUE
ENSMUST00000087351	ENSMUSG00000046434	Hnrnpa1	protein_coding	849	cds	GGC	AAT	263	-57	chr15	103243640	103243642	+	12987	24.1229	23.0807	43.0537	30.4751	22.2707	34.63	87.3758	90.2572	3	3	FALSE	0	FALSE	TRUE
ENSMUST00000087351	ENSMUSG00000046434	Hnrnpa1	protein_coding	1017	cds	TTC	NA	319	-1	chr15	103243986	103243988	+	12997	29.8497	43.741	18.4149	39.9293	38.1802	30.6161	108.726	92.0055	3	3	TRUE	0	FALSE	TRUE
ENSMUST00000033541	ENSMUSG00000031198	Fundc2	protein_coding	484	cds	TCC	NA	150	-1	chrX	75394381	75394383	+	36443	13.4164	13.4164	11.2246	12.3225	12.7017	14.9674	39.9916	38.0574	3	3	TRUE	0	FALSE	TRUE
ENSMUST00000102782	ENSMUSG00000078193	Gm2000	protein_coding	38	cds	ATG	GCC	0	-123	chr1	156366077	156366079	+	1840	154.744	194.318	172.634	195.94	102.983	191.403	490.327	521.696	3	3	TRUE	0	FALSE	TRUE
ENSMUST00000102782	ENSMUSG00000078193	Gm2000	protein_coding	404	cds	GCC	NA	122	-1	chr1	156366443	156366445	+	1849	109.505	91.7874	144.314	115.654	42.1002	100.266	258.02	345.606	3	3	TRUE	0	FALSE	TRUE
ENSMUST00000001181	ENSMUSG00000020241	Col6a2	protein_coding	1266	cds	GGA	GAG	291	-743	chr10	76611975	76611973	-	2991	18.271	25.7946	42.3597	82.1737	19.7589	60.163	162.096	86.4252	3	3	FALSE	0	FALSE	FALSE
ENSMUST00000001181	ENSMUSG00000020241	Col6a2	protein_coding	3492	cds	TGT	NA	1033	-1	chr10	76596219	76596217	-	2978	16.6667	19.4809	16.7288	51.0471	19.8579	20.8184	91.7234	52.8764	3	3	TRUE	0	FALSE	TRUE
ENSMUST00000105413	ENSMUSG00000020241	Col6a2	protein_coding	961	cds	GGA	GAG	291	-642	chr10	76611975	76611973	-	2991	18.271	27.0879	44.6878	87.3792	20.6054	60.163	168.148	90.0467	3	3	FALSE	0	FALSE	FALSE
ENSMUST00000166123	ENSMUSG00000021282	Eif5	protein_coding	397	5utr	NA	NA	-230	-1519	chr12	111539471	111539473	+	8654	18.4383	26.4517	15.8194	35.3175	19.289	19.4809	74.0874	60.7094	3	3	FALSE	0	FALSE	TRUE
ENSMUST00000027810	ENSMUSG00000026526	Fh1	protein_coding	62	cds	ATG	TAC	0	-507	chr1	175625574	175625572	-	2148	38.8248	26.5372	36.7525	34.8639	12.1985	27.167	74.2294	102.114	3	3	TRUE	0	FALSE	TRUE
ENSMUST00000002845	ENSMUSG00000002768	Mea1	protein_coding	612	cds	AAG	NA	173	-1	chr17	46682877	46682879	+	15396	55.8663	60.4608	55.9957	35.1687	22.9399	42.9864	101.095	172.323	3	3	TRUE	0	FALSE	TRUE
ENSMUST00000003268	ENSMUSG00000003200	Sh3gl1	protein_coding	1277	cds	CAG	NA	367	-1	chr17	56017548	56017546	-	15433	24.3175	33	28.0296	24.8411	13.5811	27.655	66.0772	85.347	3	3	TRUE	0	FALSE	TRUE
ENSMUST00000047131	ENSMUSG00000002319	Ipo4	protein_coding	3329	cds	ACT	NA	1081	-1	chr14	55625917	55625915	-	11027	11.1747	21.0615	10.0262	25.5241	14.6223	14.1972	54.3436	42.2624	3	3	TRUE	0	FALSE	TRUE
ENSMUST00000032779	ENSMUSG00000030560	Ctsc	protein_coding	1501	cds	TTA	NA	461	-1	chr7	88309896	88309898	+	29960	12.4039	25.1005	20.0939	28.5749	10.3252	16.6687	55.5688	57.5983	3	3	TRUE	0	FALSE	TRUE
ENSMUST00000029082	ENSMUSG00000027566	Psma7	protein_coding	609	cds	GAT	GAT	183	-65	chr2	180037425	180037423	-	20686	11.2143	11.3686	15.7501	10.0518	10.7952	14.0273	34.8742	38.333	3	3	FALSE	0	FALSE	TRUE
ENSMUST00000029082	ENSMUSG00000027566	Psma7	protein_coding	801	cds	TCT	NA	247	-1	chr2	180036487	180036485	-	20679	46.8124	49.8809	52.4728	62.2295	33.5328	63.3824	159.145	149.166	3	3	TRUE	0	FALSE	TRUE
ENSMUST00000106923	ENSMUSG00000073982	Rhog	protein_coding	199	cds	ATG	CAG	0	-191	chr7	102240245	102240243	-	30207	31.1169	30.5316	45.7035	32.9075	41.0244	30.3572	104.289	107.352	3	3	TRUE	0	FALSE	FALSE
ENSMUST00000106923	ENSMUSG00000073982	Rhog	protein_coding	769	cds	TTG	NA	190	-1	chr7	102239675	102239673	-	30205	23.048	14.5905	36.2049	18.0004	11.2136	11.8416	41.0555	73.8434	3	3	TRUE	0	FALSE	FALSE
ENSMUST00000098230	ENSMUSG00000073982	Rhog	protein_coding	147	cds	ATG	CAG	0	-191	chr7	102240245	102240243	-	30207	31.1169	30.5316	45.7035	32.9075	41.0244	30.3572	104.289	107.352	3	3	TRUE	0	FALSE	FALSE
ENSMUST00000098230	ENSMUSG00000073982	Rhog	protein_coding	717	cds	TTG	NA	190	-1	chr7	102239675	102239673	-	30205	23.048	14.5905	36.2049	18.0004	11.2136	11.8416	41.0555	73.8434	3	3	TRUE	0	FALSE	FALSE
ENSMUST00000100507	ENSMUSG00000056076	Eif3b	protein_coding	1200	cds	CCT	CAG	389	-414	chr5	140430071	140430073	+	26421	14.2974	15.6012	36.7664	22.6133	15.1333	27.7753	65.522	66.665	3	3	FALSE	0	FALSE	TRUE
ENSMUST00000156473	ENSMUSG00000046032	Snx12	protein_coding	400	cds	CCA	CTG	91	-79	chrX	101214514	101214512	-	36608	22.4583	21.8178	26.9327	33.7054	22.6066	17.8046	74.1166	71.2089	3	3	FALSE	0	FALSE	FALSE
ENSMUST00000120389	ENSMUSG00000046032	Snx12	protein_coding	396	cds	CCA	CTG	91	-71	chrX	101214514	101214512	-	36608	22.4583	21.8178	26.9327	33.7054	20.3836	17.8046	71.8936	71.2089	3	3	FALSE	0	FALSE	FALSE
ENSMUST00000077876	ENSMUSG00000046032	Snx12	protein_coding	410	cds	CCA	CTG	91	-75	chrX	101214514	101214512	-	36608	22.4583	21.8178	26.9327	33.7054	21.7582	17.8046	73.2682	71.2089	3	3	FALSE	0	FALSE	FALSE
ENSMUST00000039161	ENSMUSG00000035443	Thyn1	protein_coding	296	cds	CCA	GAA	63	-163	chr9	27003697	27003699	+	33397	11.5841	21.3784	23.5833	21.4993	10.2562	27.0939	58.8495	56.5457	3	3	FALSE	0	FALSE	TRUE
ENSMUST00000039161	ENSMUSG00000035443	Thyn1	protein_coding	359	cds	CCC	AAG	84	-142	chr9	27003760	27003762	+	33398	32.5721	25.2362	21.6723	26.8527	21.6372	30.1041	78.5939	79.4806	3	3	FALSE	0	FALSE	TRUE
ENSMUST00000079772	ENSMUSG00000063727	Tnfrsf11b	protein_coding	237	cds	ATG	AAC	0	-401	chr15	54278248	54278246	-	11814	40.0384	47.7088	48.4739	24.7234	16.0522	34.4707	75.2463	136.221	3	3	TRUE	0	FALSE	TRUE
ENSMUST00000023128	ENSMUSG00000000555	Itga5	protein_coding	315	cds	CCG	CTG	26	-1027	chr15	103366449	103366447	-	13030	19.6215	19.1176	11.8392	30.9711	31.0166	30.9006	92.8884	50.5784	3	3	FALSE	0	FALSE	TRUE
ENSMUST00000023128	ENSMUSG00000000555	Itga5	protein_coding	2109	cds	GGC	CTC	624	-429	chr15	103351592	103351590	-	13016	27.7576	34.7478	31.7337	34.561	20	33.3333	87.8943	94.239	3	3	FALSE	0	FALSE	TRUE
ENSMUST00000043050	ENSMUSG00000036599	Chst12	protein_coding	166	5utr	NA	NA	-61	-1320	chr5	140523559	140523561	+	26429	18.6026	11.9477	12.1244	17.1033	19.6218	20	56.7251	42.6747	3	3	FALSE	0	FALSE	FALSE
ENSMUST00000124142	ENSMUSG00000036599	Chst12	protein_coding	172	5utr	NA	NA	-61	-594	chr5	140523559	140523561	+	26429	18.8774	11.9477	12.1244	17.1033	19.263	18.8037	55.17	42.9495	3	3	FALSE	0	FALSE	FALSE
ENSMUST00000129342	ENSMUSG00000028790	Khdrbs1	nonsense_mediated_decay	137	cds	ATG	CAG	0	-443	chr4	129742161	129742159	-	23926	54.3175	59.2948	53.5465	41.5891	22.2201	34.9634	98.7726	167.159	3	3	TRUE	0	FALSE	FALSE
ENSMUST00000066257	ENSMUSG00000028790	Khdrbs1	protein_coding	136	cds	ATG	CAG	0	-443	chr4	129742161	129742159	-	23926	54.3175	59.2948	53.5465	41.5891	22.2201	34.9634	98.7726	167.159	3	3	TRUE	0	FALSE	FALSE
ENSMUST00000182502	ENSMUSG00000081906	Rpl9-ps1	protein_coding	126	cds	GTG	GAG	42	-149	chr11	83645496	83645494	-	6139	25.2982	20.0606	32.9711	17.2832	12.9692	35.3333	65.5857	78.3299	3	3	FALSE	0	FALSE	TRUE
ENSMUST00000182502	ENSMUSG00000081906	Rpl9-ps1	protein_coding	492	cds	ACA	GTT	164	-27	chr11	83645130	83645128	-	6133	29.5674	21.2037	32.8309	32.1702	31.5507	26.2057	89.9266	83.6021	3	3	FALSE	0	FALSE	TRUE
ENSMUST00000182502	ENSMUSG00000081906	Rpl9-ps1	protein_coding	495	cds	GTT	AAA	165	-26	chr11	83645127	83645125	-	6132	41.955	38.7323	30.3419	48.6196	35.8086	81.6887	166.117	111.029	3	3	FALSE	0	FALSE	TRUE
ENSMUST00000030942	ENSMUSG00000029066	Mrpl20	protein_coding	579	cds	CAC	NA	148	-1	chr4	155808646	155808648	+	24572	19.8009	40.8588	11.6087	35.2194	27.4533	13.2182	75.8909	72.2683	3	3	TRUE	0	FALSE	FALSE
ENSMUST00000185148	ENSMUSG00000029066	Mrpl20	protein_coding	342	cds	CAC	NA	111	-1	chr4	155808646	155808648	+	24572	19.8009	40.8588	11.6087	35.2194	29.2556	13.2182	77.6932	72.2683	3	3	TRUE	0	FALSE	FALSE
ENSMUST00000137487	ENSMUSG00000029066	Mrpl20	nonsense_mediated_decay	450	cds	CAC	NA	148	-1	chr4	155808646	155808648	+	24572	19.8009	40.8588	11.6087	35.2194	28.1376	13.2182	76.5752	72.2683	3	3	TRUE	0	FALSE	FALSE
ENSMUST00000058437	ENSMUSG00000043716	Rpl7	protein_coding	284	cds	ATG	GAG	0	-270	chr1	16104379	16104377	-	97	85.1112	109.617	86.9446	137.939	97.1816	132.261	367.381	281.673	3	3	TRUE	0	FALSE	TRUE
ENSMUST00000058437	ENSMUSG00000043716	Rpl7	protein_coding	707	cds	GGC	ACC	141	-129	chr1	16102763	16102761	-	77	16.6368	10.9487	13.2045	12.8645	12.9813	10.3957	36.2414	40.79	3	3	FALSE	0	FALSE	TRUE
ENSMUST00000058437	ENSMUSG00000043716	Rpl7	protein_coding	995	cds	CCA	CGA	237	-33	chr1	16101830	16101828	-	62	10.7339	10.9452	15.0678	18.4377	10.328	12.0518	40.8174	36.747	3	3	FALSE	0	FALSE	TRUE
ENSMUST00000058437	ENSMUSG00000043716	Rpl7	protein_coding	1091	cds	AAC	NA	269	-1	chr1	16101734	16101732	-	58	84.0709	86.4566	125.414	95.0408	51.2743	107.907	254.222	295.941	3	3	TRUE	0	FALSE	TRUE
ENSMUST00000149566	ENSMUSG00000043716	Rpl7	protein_coding	501	cds	GCA	CCT	167	-111	chr1	16102762	16102760	-	76	17.7793	11.0431	13.1547	15.1999	12.8263	11.5006	39.5268	41.9771	3	3	FALSE	0	FALSE	TRUE
ENSMUST00000149566	ENSMUSG00000043716	Rpl7	protein_coding	705	cds	AGG	ATC	235	-43	chr1	16101913	16101911	-	68	11.9885	18.0278	14.302	18.288	11.1959	14.53	44.0138	44.3182	3	3	FALSE	0	FALSE	TRUE
ENSMUST00000149566	ENSMUSG00000043716	Rpl7	protein_coding	789	cds	CAC	GAG	263	-15	chr1	16101829	16101827	-	61	15.7743	13.0997	19.6576	22.8703	18.4398	21.9215	63.2317	48.5316	3	3	FALSE	0	FALSE	TRUE
ENSMUST00000030578	ENSMUSG00000028788	Ptp4a2	protein_coding	451	5utr	NA	NA	-536	-1039	chr4	129839047	129839049	+	23933	90.6812	54.4944	109.358	33.0421	23.9832	34.497	91.5223	254.533	3	3	FALSE	0	FALSE	FALSE
ENSMUST00000030578	ENSMUSG00000028788	Ptp4a2	protein_coding	670	5utr	NA	NA	-317	-820	chr4	129839266	129839268	+	23938	115	106.1	103.177	136.126	70.8796	132.463	339.468	324.276	3	3	FALSE	0	FALSE	FALSE
ENSMUST00000030578	ENSMUSG00000028788	Ptp4a2	protein_coding	671	5utr	NA	NA	-316	-819	chr4	129839267	129839269	+	23939	39.2253	33.2493	39.1305	47.9692	40.918	60.998	149.885	111.605	3	3	FALSE	0	FALSE	FALSE
ENSMUST00000165853	ENSMUSG00000028788	Ptp4a2	protein_coding	162	5utr	NA	NA	-536	-1039	chr4	129839047	129839049	+	23933	90.6812	54.4944	109.358	33.0421	23.9832	34.497	91.5223	254.533	3	3	FALSE	0	FALSE	FALSE
ENSMUST00000165853	ENSMUSG00000028788	Ptp4a2	protein_coding	381	5utr	NA	NA	-317	-820	chr4	129839266	129839268	+	23938	115	106.1	103.177	136.126	70.8796	132.463	339.468	324.276	3	3	FALSE	0	FALSE	FALSE
ENSMUST00000165853	ENSMUSG00000028788	Ptp4a2	protein_coding	382	5utr	NA	NA	-316	-819	chr4	129839267	129839269	+	23939	39.2253	33.2493	39.1305	47.9692	40.918	60.998	149.885	111.605	3	3	FALSE	0	FALSE	FALSE
ENSMUST00000043937	ENSMUSG00000041084	Ostc	protein_coding	135	cds	CCC	TGG	22	-127	chr3	130709310	130709308	-	22304	42.2195	39.139	31.9719	53.1412	10.5	21.7505	85.3918	113.33	3	3	FALSE	0	FALSE	TRUE
ENSMUST00000043937	ENSMUSG00000041084	Ostc	protein_coding	237	cds	CCA	AGT	56	-93	chr3	130706015	130706013	-	22303	60.0444	58.7889	38.5517	42.3157	46.0987	55.7896	144.204	157.385	3	3	FALSE	0	FALSE	TRUE
ENSMUST00000026266	ENSMUSG00000025236	Adpgk	protein_coding	650	cds	CCA	GAG	196	-299	chr9	59310293	59310295	+	34001	20.4124	17.5434	49.9336	65.6574	39	41.2915	145.949	87.8894	3	3	FALSE	0	FALSE	TRUE
ENSMUST00000026266	ENSMUSG00000025236	Adpgk	protein_coding	1544	cds	GAT	NA	494	-1	chr9	59315273	59315275	+	34003	31.3795	54.0929	62.655	45.8261	42.5853	48.2088	136.62	148.127	3	3	TRUE	0	FALSE	TRUE
ENSMUST00000161812	ENSMUSG00000022150	Dab2	protein_coding	254	cds	ATG	TCT	0	-527	chr15	6416903	6416905	+	11474	21.362	15.0062	29.6322	17.143	12.0033	12.943	42.0893	66.0004	3	3	TRUE	0	FALSE	FALSE
ENSMUST00000106058	ENSMUSG00000028180	Zranb2	protein_coding	1153	cds	AAA	AAA	298	-32	chr3	157545057	157545059	+	22553	16.1658	17.5124	21.481	23.7488	18.0739	14.284	56.1067	55.1591	3	3	FALSE	0	FALSE	FALSE
ENSMUST00000106057	ENSMUSG00000028180	Zranb2	protein_coding	925	cds	AAA	AAA	298	-22	chr3	157545057	157545059	+	22553	17.7932	17.5124	21.481	23.7488	18.0739	14.284	56.1067	56.7866	3	3	FALSE	0	FALSE	FALSE
ENSMUST00000029831	ENSMUSG00000028180	Zranb2	protein_coding	843	cds	AAA	AAA	261	-32	chr3	157545087	157545089	+	22555	16.1658	17.5124	21.481	23.7488	18.0739	14.284	56.1067	55.1591	3	3	FALSE	0	FALSE	TRUE
ENSMUST00000078286	ENSMUSG00000063888	Rpl7l1	protein_coding	609	cds	GGG	AAG	195	-51	chr17	46778219	46778217	-	15403	12.5732	11	12.1572	12.0077	22.8218	13.6445	48.4739	35.7304	3	3	FALSE	0	FALSE	TRUE
ENSMUST00000078286	ENSMUSG00000063888	Rpl7l1	protein_coding	759	cds	AAC	NA	245	-1	chr17	46778069	46778067	-	15401	28.0583	34.8951	43.1359	29.7881	21.8613	21.8861	73.5356	106.089	3	3	TRUE	0	FALSE	TRUE
ENSMUST00000072359	ENSMUSG00000058126	Tpm3-rs7	protein_coding	68	cds	ATG	GCC	0	-248	chr14	113314675	113314677	+	11335	65.9966	75.7636	70.9942	74.0512	21.6084	37.7417	133.401	212.754	3	3	TRUE	0	FALSE	TRUE
ENSMUST00000072359	ENSMUSG00000058126	Tpm3-rs7	protein_coding	410	cds	GCA	AAG	114	-134	chr14	113315017	113315019	+	11339	18.5273	11.5692	11.3582	20.6766	13.2586	27.0496	60.9849	41.4548	3	3	FALSE	0	FALSE	TRUE
ENSMUST00000072359	ENSMUSG00000058126	Tpm3-rs7	protein_coding	746	cds	ACC	AAA	226	-22	chr14	113315353	113315355	+	11348	26.4921	23.5983	50.8649	20.9429	28.8977	58.4834	108.324	100.955	3	3	FALSE	0	FALSE	TRUE
ENSMUST00000062601	ENSMUSG00000062006	Rpl34	protein_coding	256	cds	CTT	TCC	10	-107	chr3	130729264	130729262	-	22320	27.1743	20.2575	26.5721	28.6962	23.1821	37.8948	89.7731	74.0039	3	3	FALSE	0	FALSE	FALSE
ENSMUST00000062601	ENSMUSG00000062006	Rpl34	protein_coding	304	cds	GGC	AAC	26	-91	chr3	130729138	130729136	-	22318	53.1903	55.6881	84.454	118.281	34.9096	73.826	227.017	193.332	3	3	FALSE	0	FALSE	FALSE
ENSMUST00000062601	ENSMUSG00000062006	Rpl34	protein_coding	340	cds	GGG	AAA	38	-79	chr3	130729102	130729100	-	22317	23.9958	16.7483	24.5252	26.4642	12.2804	31.8652	70.6099	65.2694	3	3	FALSE	0	FALSE	FALSE
ENSMUST00000062601	ENSMUSG00000062006	Rpl34	protein_coding	382	cds	CTT	CGA	52	-65	chr3	130729060	130729058	-	22316	45.3031	52.2922	53.7505	54.9731	15.584	20.2984	90.8554	151.346	3	3	FALSE	0	FALSE	FALSE
ENSMUST00000062601	ENSMUSG00000062006	Rpl34	protein_coding	454	cds	GCC	TAT	76	-41	chr3	130728789	130728787	-	22313	10.8112	18.6727	19.6354	23.4206	24.2386	31.373	79.0323	49.1194	3	3	FALSE	0	FALSE	FALSE
ENSMUST00000062601	ENSMUSG00000062006	Rpl34	protein_coding	496	cds	ATC	AAG	90	-27	chr3	130726959	130726957	-	22311	21.406	21.2891	15.9965	25.8555	18.392	25.5896	69.8371	58.6916	3	3	FALSE	0	FALSE	FALSE
ENSMUST00000062601	ENSMUSG00000062006	Rpl34	protein_coding	574	cds	AAA	NA	116	-1	chr3	130726881	130726879	-	22306	39.1817	29.4264	50.5664	48.48	29.4588	40.1132	118.052	119.174	3	3	TRUE	0	FALSE	FALSE
ENSMUST00000079085	ENSMUSG00000062006	Rpl34	protein_coding	90	cds	ATG	GTC	0	-117	chr3	130729294	130729292	-	22321	24.7977	29.5465	17.7326	19.4237	22.2243	15.7723	57.4204	72.0768	3	3	TRUE	0	FALSE	FALSE
ENSMUST00000079085	ENSMUSG00000062006	Rpl34	protein_coding	120	cds	CTT	TCC	10	-107	chr3	130729264	130729262	-	22320	26.5381	19.6363	26.048	28.1511	22.5488	37.3229	88.0228	72.2224	3	3	FALSE	0	FALSE	FALSE
ENSMUST00000079085	ENSMUSG00000062006	Rpl34	protein_coding	168	cds	GGC	AAC	26	-91	chr3	130729138	130729136	-	22318	52.1804	54.4889	83.2445	116.729	34.0665	72.8751	223.671	189.914	3	3	FALSE	0	FALSE	FALSE
ENSMUST00000079085	ENSMUSG00000062006	Rpl34	protein_coding	204	cds	GGG	AAA	38	-79	chr3	130729102	130729100	-	22317	23.4053	16.1845	24.0253	25.9442	11.8422	31.3569	69.1432	63.6151	3	3	FALSE	0	FALSE	FALSE
ENSMUST00000079085	ENSMUSG00000062006	Rpl34	protein_coding	246	cds	CTT	CGA	52	-65	chr3	130729060	130729058	-	22316	44.4065	51.1484	52.9045	54.1327	15.0866	19.912	89.1313	148.459	3	3	FALSE	0	FALSE	FALSE
ENSMUST00000079085	ENSMUSG00000062006	Rpl34	protein_coding	318	cds	GCC	TAT	76	-41	chr3	130728789	130728787	-	22313	10.4101	18.0774	19.1934	22.9347	24.2386	30.8699	78.0433	47.681	3	3	FALSE	0	FALSE	FALSE
ENSMUST00000079085	ENSMUSG00000062006	Rpl34	protein_coding	360	cds	ATC	AAG	90	-27	chr3	130726959	130726957	-	22311	20.8527	20.7498	15.5976	25.3423	17.8444	25.1474	68.3341	57.2001	3	3	FALSE	0	FALSE	FALSE
ENSMUST00000079085	ENSMUSG00000062006	Rpl34	protein_coding	438	cds	AAA	NA	116	-1	chr3	130726881	130726879	-	22306	38.373	28.6557	49.7581	47.7126	28.7132	40.1132	116.539	116.787	3	3	TRUE	0	FALSE	FALSE
ENSMUST00000133802	ENSMUSG00000062006	Rpl34	protein_coding	26	cds	ATG	GTC	0	-90	chr3	130729294	130729292	-	22321	27.4027	31.4282	20.4197	21.5491	23.8948	17.0862	62.5301	79.2506	3	3	TRUE	0	FALSE	FALSE
ENSMUST00000133802	ENSMUSG00000062006	Rpl34	protein_coding	56	cds	CTT	TCC	10	-80	chr3	130729264	130729262	-	22320	29.2523	20.4307	29.3755	30.7541	23.6654	40.5167	94.9362	79.0585	3	3	FALSE	0	FALSE	FALSE
ENSMUST00000133802	ENSMUSG00000062006	Rpl34	protein_coding	104	cds	GGC	AAC	26	-64	chr3	130729138	130729136	-	22318	56.5032	56.2358	90.9765	124.179	36.3142	78.2	238.693	203.715	3	3	FALSE	0	FALSE	FALSE
ENSMUST00000133802	ENSMUSG00000062006	Rpl34	protein_coding	140	cds	GGG	AAA	38	-52	chr3	130729102	130729100	-	22317	25.923	17.5331	27.1971	28.4264	13.0065	34.1932	75.626	70.6531	3	3	FALSE	0	FALSE	FALSE
ENSMUST00000133802	ENSMUSG00000062006	Rpl34	protein_coding	182	cds	CTT	CGA	52	-38	chr3	130729060	130729058	-	22316	48.2416	53.892	58.3001	58.1573	16.4091	22.0622	96.6287	160.434	3	3	FALSE	0	FALSE	FALSE
ENSMUST00000133802	ENSMUSG00000062006	Rpl34	protein_coding	254	cds	GCC	TAT	76	-14	chr3	130728789	130728787	-	22313	12.1126	19.5016	21.993	25.2523	26.787	33.6769	85.7162	53.6072	3	3	FALSE	0	FALSE	FALSE
ENSMUST00000023087	ENSMUSG00000022451	Twf1	protein_coding	1150	cds	GAC	NA	349	-1	chr15	94579826	94579824	-	12583	11.9213	29.266	40.3084	27.7932	14.8492	20.2978	62.9403	81.4956	3	3	TRUE	0	FALSE	TRUE
ENSMUST00000189661	ENSMUSG00000026600	Soat1	protein_coding	529	cds	CCA	GAA	105	-435	chr1	156444599	156444597	-	1856	17.3596	23.1412	12.6491	28.0801	13.5295	22.0453	63.6549	53.15	3	3	FALSE	0	FALSE	FALSE
ENSMUST00000189661	ENSMUSG00000026600	Soat1	protein_coding	1483	cds	AAA	GAC	423	-117	chr1	156434168	156434166	-	1851	28.3421	37.2294	32.2492	37.7384	23.3695	35.8164	96.9243	97.8206	3	3	FALSE	0	FALSE	FALSE
ENSMUST00000051396	ENSMUSG00000026600	Soat1	protein_coding	351	cds	CCA	GAA	105	-435	chr1	156444599	156444597	-	1856	17.3596	23.1412	12.6491	28.0801	13.5295	22.0453	63.6549	53.15	3	3	FALSE	0	FALSE	FALSE
ENSMUST00000051396	ENSMUSG00000026600	Soat1	protein_coding	1305	cds	AAA	GAC	423	-117	chr1	156434168	156434166	-	1851	28.3421	37.2294	32.2492	37.7384	23.3695	35.8164	96.9243	97.8206	3	3	FALSE	0	FALSE	FALSE
ENSMUST00000187507	ENSMUSG00000026600	Soat1	protein_coding	376	cds	CCA	GAA	72	-147	chr1	156444599	156444597	-	1856	17.3596	23.1412	12.6491	28.0801	13.5295	22.0453	63.6549	53.15	3	3	FALSE	0	FALSE	FALSE
ENSMUST00000028511	ENSMUSG00000027099	Mtx2	protein_coding	201	cds	ATG	TCT	0	-263	chr2	74826003	74826005	+	19148	20.0992	30.9719	19.3307	31.9923	15.054	27.3351	74.3814	70.4017	3	3	TRUE	0	FALSE	TRUE
ENSMUST00000034966	ENSMUSG00000032399	Rpl4	protein_coding	302	cds	GGG	ACC	82	-337	chr9	64175276	64175278	+	34161	15.2643	13.9652	23.4004	19.9724	25.7529	16.4059	62.1312	52.63	3	3	FALSE	0	FALSE	TRUE
ENSMUST00000034966	ENSMUSG00000032399	Rpl4	protein_coding	701	cds	GGT	ATC	215	-204	chr9	64177051	64177053	+	34168	21.6481	23.6714	32.4185	37.5001	13.65	33.0366	84.1867	77.738	3	3	FALSE	0	FALSE	TRUE
ENSMUST00000034966	ENSMUSG00000032399	Rpl4	protein_coding	977	cds	AAG	ATT	307	-112	chr9	64177912	64177914	+	34177	16.807	15.0997	15.6631	22.4979	16.2488	28.8958	67.6425	47.5698	3	3	FALSE	0	FALSE	TRUE
ENSMUST00000034966	ENSMUSG00000032399	Rpl4	protein_coding	1064	cds	AGG	AAT	336	-83	chr9	64177999	64178001	+	34182	13.4345	11.7461	11.3779	21.6329	11.1322	14.0847	46.8499	36.5585	3	3	FALSE	0	FALSE	TRUE
ENSMUST00000034966	ENSMUSG00000032399	Rpl4	protein_coding	1094	cds	CAC	AAA	346	-73	chr9	64178234	64178236	+	34183	35.2768	23.5639	42.9575	48.5716	56.6941	81.0564	186.322	101.798	3	3	FALSE	0	FALSE	TRUE
ENSMUST00000034966	ENSMUSG00000032399	Rpl4	protein_coding	1310	cds	GCA	NA	418	-1	chr9	64178450	64178452	+	34184	65.5763	67.6829	82.4878	80.8247	34.9451	83.4868	199.257	215.747	3	3	TRUE	0	FALSE	TRUE
ENSMUST00000066587	ENSMUSG00000020777	Acox1	protein_coding	2321	cds	CTT	NA	660	-1	chr11	116173554	116173552	-	7212	19.6699	21.8613	13	14.7741	14.9671	20.4167	50.1578	54.5312	3	3	TRUE	0	FALSE	FALSE
ENSMUST00000072948	ENSMUSG00000020777	Acox1	protein_coding	2077	cds	CTT	NA	660	-1	chr11	116173554	116173552	-	7212	19.6699	21.8613	13	14.7741	14.9671	20.4167	50.1578	54.5312	3	3	TRUE	0	FALSE	FALSE
ENSMUST00000148601	ENSMUSG00000020777	Acox1	protein_coding	1872	cds	CTT	NA	624	-1	chr11	116173554	116173552	-	7212	19.6699	21.8613	13	14.7741	14.9671	20.4167	50.1578	54.5312	3	3	TRUE	0	FALSE	FALSE
ENSMUST00000041761	ENSMUSG00000039405	Prss23	protein_coding	59	5utr	NA	NA	-93	-1241	chr7	89517528	89517526	-	29983	18.106	23.5538	10.6542	25.4639	14.5815	15.3191	55.3645	52.3139	3	3	FALSE	0	FALSE	TRUE
ENSMUST00000041761	ENSMUSG00000039405	Prss23	protein_coding	427	cds	GGC	AGC	92	-290	chr7	89510584	89510582	-	29978	46.5452	42.7863	35.0435	43.8407	25.5616	39.5876	108.99	124.375	3	3	FALSE	0	FALSE	TRUE
ENSMUST00000041761	ENSMUSG00000039405	Prss23	protein_coding	673	cds	TGC	ATA	174	-208	chr7	89510338	89510336	-	29973	12.113	13.3395	21.9758	16.4317	18.3177	24.3076	59.057	47.4283	3	3	FALSE	0	FALSE	TRUE
ENSMUST00000041761	ENSMUSG00000039405	Prss23	protein_coding	862	cds	AAT	GAC	237	-145	chr7	89510149	89510147	-	29968	25.4295	25.0979	38.9818	21.6901	11.8992	26.5861	60.1754	89.5092	3	3	FALSE	0	FALSE	TRUE
ENSMUST00000041761	ENSMUSG00000039405	Prss23	protein_coding	916	cds	AAA	AGA	255	-127	chr7	89510095	89510093	-	29966	33.1165	31.5263	32.4789	20.3367	11.2442	25.9788	57.5597	97.1217	3	3	FALSE	0	FALSE	TRUE
ENSMUST00000041761	ENSMUSG00000039405	Prss23	protein_coding	1294	cds	GGG	NA	381	-1	chr7	89509717	89509715	-	29961	39.8786	65.0645	39.7687	40.7812	40.6041	26.5861	107.971	144.712	3	3	TRUE	0	FALSE	TRUE
ENSMUST00000090569	ENSMUSG00000068749	Psma5	protein_coding	351	cds	ATG	TTC	0	-241	chr3	108257276	108257278	+	22139	37.8773	60.6038	43.7991	29.3698	17.2987	31.3706	78.0392	142.28	3	3	TRUE	0	FALSE	TRUE
ENSMUST00000027602	ENSMUSG00000026356	Dars	protein_coding	142	cds	ATG	CCC	0	-501	chr1	128417218	128417216	-	1568	55.2811	53.2442	35.8443	24.4816	11.051	22.8767	58.4093	144.37	3	3	TRUE	0	FALSE	FALSE
ENSMUST00000027602	ENSMUSG00000026356	Dars	protein_coding	1642	cds	CCT	NA	500	-1	chr1	128364240	128364238	-	1564	30.8142	27.9307	48.9789	38.1424	18.3848	35.3883	91.9155	107.724	3	3	TRUE	0	FALSE	TRUE
ENSMUST00000064309	ENSMUSG00000026356	Dars	protein_coding	151	cds	ATG	CCC	0	-87	chr1	128417218	128417216	-	1568	65.2671	62.5159	46.097	34.6804	15.7176	30.098	80.496	173.88	3	3	TRUE	0	FALSE	FALSE
ENSMUST00000005066	ENSMUSG00000004936	Map2k1	protein_coding	1515	cds	ATC	NA	392	-1	chr9	64186691	64186689	-	34185	65.706	64.5979	77.6316	87.7895	53.2922	93.7127	234.794	207.935	3	3	TRUE	0	FALSE	TRUE
ENSMUST00000112308	ENSMUSG00000024120	Lrpprc	protein_coding	4218	cds	TCA	NA	1391	-1	chr17	84705422	84705420	-	15761	13.1849	15.9991	24.7412	35.5872	12.6608	37.2384	85.4864	53.9252	3	3	TRUE	0	FALSE	TRUE
ENSMUST00000055506	ENSMUSG00000032777	Gtf3c1	protein_coding	103	cds	ATG	GAC	0	-2101	chr7	125707678	125707676	-	30617	32.4573	35.965	37.5378	23.7075	11.9346	25.509	61.1512	105.96	3	3	TRUE	0	FALSE	TRUE
ENSMUST00000117803	ENSMUSG00000065968	Ifitm7	protein_coding	419	cds	GTG	AAG	87	-54	chr16	13983633	13983631	-	13137	42.111	37.9476	40.9179	28.1254	21.3068	29.6667	79.0989	120.976	3	3	FALSE	0	FALSE	FALSE
ENSMUST00000178021	ENSMUSG00000065968	Ifitm7	protein_coding	989	cds	GTG	AAG	59	-48	chr16	13983633	13983631	-	13137	42.111	37.9476	40.9179	28.1254	21.3068	29.6667	79.0989	120.976	3	3	FALSE	0	FALSE	FALSE
ENSMUST00000173969	ENSMUSG00000091931	Gon7	protein_coding	346	cds	TCT	NA	97	-1	chr12	102754081	102754079	-	8477	53.6115	40.2536	49.2261	58.429	36.1596	64.5089	159.098	143.091	3	3	TRUE	0	FALSE	TRUE
ENSMUST00000107236	ENSMUSG00000028126	Pip5k1a	protein_coding	2059	cds	CAC	NA	545	-1	chr3	95060487	95060485	-	21708	23.6217	37.6966	23.0562	12.6517	15.723	28.055	56.4297	84.3746	3	3	TRUE	0	FALSE	FALSE
ENSMUST00000107233	ENSMUSG00000028126	Pip5k1a	protein_coding	2117	cds	CAC	NA	546	-1	chr3	95060487	95060485	-	21708	23.6302	37.6713	23.0652	12.6517	15.7981	28.0549	56.5047	84.3667	3	3	TRUE	0	FALSE	FALSE
ENSMUST00000107232	ENSMUSG00000028126	Pip5k1a	protein_coding	1893	cds	CAC	NA	496	-1	chr3	95060487	95060485	-	21708	24.158	38.5443	23.337	12.6517	15.8851	28.5888	57.1257	86.0393	3	3	TRUE	0	FALSE	FALSE
ENSMUST00000005768	ENSMUSG00000028126	Pip5k1a	protein_coding	1960	cds	CAC	NA	544	-1	chr3	95060487	95060485	-	21708	23.6286	37.6805	23.1197	12.6517	15.7666	28.0275	56.4458	84.4288	3	3	TRUE	0	FALSE	FALSE
ENSMUST00000121292	ENSMUSG00000039209	Rpl39l	protein_coding	268	cds	GCC	AAG	13	-38	chr16	10174348	10174350	+	13084	71.7793	54.969	58.5673	62.1282	23.3493	46.4547	131.932	185.316	3	3	FALSE	0	FALSE	FALSE
ENSMUST00000044103	ENSMUSG00000039209	Rpl39l	protein_coding	242	cds	GCC	AAG	13	-38	chr16	10174348	10174350	+	13084	71.7793	54.969	58.5673	62.1282	23.3493	46.4547	131.932	185.316	3	3	FALSE	0	FALSE	FALSE
ENSMUST00000118410	ENSMUSG00000027531	Impa1	protein_coding	1751	3utr	NA	NA	1629	799	chr3	10315191	10315189	-	20793	15.9506	25.5008	26.0733	40.7552	13.278	22.6947	76.7278	67.5247	3	3	FALSE	0	FALSE	FALSE
ENSMUST00000191670	ENSMUSG00000027531	Impa1	protein_coding	774	3utr	NA	NA	719	93	chr3	10315191	10315189	-	20793	15.8987	24.7074	24.7941	38.8503	13.6078	22.6947	75.1528	65.4002	3	3	FALSE	0	FALSE	FALSE
ENSMUST00000023040	ENSMUSG00000022404	Slc25a17	protein_coding	82	cds	ATG	GCC	0	-307	chr15	81360684	81360682	-	12342	49.268	67.8781	57.8192	48.0271	37.5529	55.3176	140.898	174.965	3	3	TRUE	0	FALSE	TRUE
ENSMUST00000110894	ENSMUSG00000060126	Tpt1	protein_coding	336	cds	ATG	ATC	0	-172	chr14	75845428	75845430	+	11266	183.068	217.595	171.363	155.842	69.6752	100.354	325.871	572.026	3	3	TRUE	0	FALSE	TRUE
ENSMUST00000110894	ENSMUSG00000060126	Tpt1	protein_coding	483	cds	GGA	AAT	49	-123	chr14	75846247	75846249	+	11272	16.2503	13.2745	12.4551	22.0608	13.7205	27.5329	63.3143	41.9799	3	3	FALSE	0	FALSE	FALSE
ENSMUST00000110894	ENSMUSG00000060126	Tpt1	protein_coding	555	cds	ATG	AAC	73	-99	chr14	75846319	75846321	+	11273	20.3409	11.3063	15.6064	12.2155	10.9759	17.772	40.9634	47.2536	3	3	FALSE	0	FALSE	FALSE
ENSMUST00000110894	ENSMUSG00000060126	Tpt1	protein_coding	621	cds	ATG	AAA	95	-77	chr14	75846385	75846387	+	11276	46.1907	30.1633	56.1856	49.8531	31.5303	77.6609	159.044	132.54	3	3	FALSE	0	FALSE	FALSE
ENSMUST00000110894	ENSMUSG00000060126	Tpt1	protein_coding	849	cds	TGT	NA	171	-1	chr14	75847357	75847359	+	11282	24.4059	31.8491	26.7458	34.9177	23.7057	35.6242	94.2476	83.0008	3	3	TRUE	0	FALSE	FALSE
ENSMUST00000142061	ENSMUSG00000060126	Tpt1	protein_coding	128	5utr	NA	NA	-28	-444	chr14	75845429	75845431	+	11267	147.29	186.456	128.75	124.786	44.89	80.6205	250.296	462.497	3	3	FALSE	0	FALSE	TRUE
ENSMUST00000142061	ENSMUSG00000060126	Tpt1	protein_coding	129	5utr	NA	NA	-27	-443	chr14	75845430	75845432	+	11268	33.9444	36.3021	37.0209	25.0138	17.6299	10.3491	52.9928	107.267	3	3	FALSE	0	FALSE	TRUE
ENSMUST00000142061	ENSMUSG00000060126	Tpt1	protein_coding	200	cds	GGA	AAT	15	-123	chr14	75846247	75846249	+	11272	17.4228	15.1131	12.9996	22.7731	14.0079	27.1532	63.9341	45.5355	3	3	FALSE	0	FALSE	FALSE
ENSMUST00000142061	ENSMUSG00000060126	Tpt1	protein_coding	272	cds	ATG	AAC	39	-99	chr14	75846319	75846321	+	11273	20.3409	13.0204	15.6064	12.7487	10.9759	17.4781	41.2027	48.9676	3	3	FALSE	0	FALSE	FALSE
ENSMUST00000142061	ENSMUSG00000060126	Tpt1	protein_coding	338	cds	ATG	AAA	61	-77	chr14	75846385	75846387	+	11276	46.1907	30.1633	56.1856	49.8531	31.5303	77.6609	159.044	132.54	3	3	FALSE	0	FALSE	FALSE
ENSMUST00000142061	ENSMUSG00000060126	Tpt1	protein_coding	566	cds	TGT	NA	137	-1	chr14	75847357	75847359	+	11282	25.8757	34.8633	27.5617	35.8637	24.1113	35.1733	95.1483	88.3008	3	3	TRUE	0	FALSE	FALSE
ENSMUST00000026262	ENSMUSG00000025232	Hexa	protein_coding	1468	cds	GAC	TGG	428	-100	chr9	59563307	59563309	+	34020	28.8547	19.4485	29.7251	36.4418	17.9196	33.5508	87.9121	78.0283	3	3	FALSE	0	FALSE	TRUE
ENSMUST00000042235	ENSMUSG00000037742	Eef1a1	protein_coding	120	cds	ATG	GGA	0	-462	chr9	78480655	78480653	-	34538	125.894	126.663	105.588	136.6	38.3768	115.763	290.739	358.144	3	3	TRUE	0	FALSE	FALSE
ENSMUST00000042235	ENSMUSG00000037742	Eef1a1	protein_coding	138	cds	CAC	ATC	6	-456	chr9	78480637	78480635	-	34537	30.8867	35.4407	61.2352	49.101	23.9487	49.0834	122.133	127.563	3	3	FALSE	0	FALSE	FALSE
ENSMUST00000042235	ENSMUSG00000037742	Eef1a1	protein_coding	231	cds	ACC	ATC	37	-425	chr9	78480544	78480542	-	34530	29.4851	22.4368	34.6099	56.0509	17.0341	75.3576	148.443	86.5319	3	3	FALSE	0	FALSE	FALSE
ENSMUST00000042235	ENSMUSG00000037742	Eef1a1	protein_coding	291	cds	TGG	GTC	57	-405	chr9	78480394	78480392	-	34529	66.2303	63.4192	73.219	74.4809	31.6156	53.794	159.89	202.869	3	3	FALSE	0	FALSE	FALSE
ENSMUST00000042235	ENSMUSG00000037742	Eef1a1	protein_coding	294	cds	GTC	TTA	58	-404	chr9	78480391	78480389	-	34528	33.8239	18.0371	41.7882	25.8218	15.819	42.7555	84.3963	93.6492	3	3	FALSE	0	FALSE	FALSE
ENSMUST00000042235	ENSMUSG00000037742	Eef1a1	protein_coding	432	cds	GGC	ACA	104	-358	chr9	78480253	78480251	-	34519	26.8755	27.61	38.5915	29.808	22.2418	30.9735	83.0233	93.0769	3	3	FALSE	0	FALSE	FALSE
ENSMUST00000042235	ENSMUSG00000037742	Eef1a1	protein_coding	519	cds	CGC	GAG	133	-329	chr9	78480074	78480072	-	34514	16.221	20.6931	13.7668	35.1389	13.6103	25.941	74.6902	50.6809	3	3	FALSE	0	FALSE	FALSE
ENSMUST00000042235	ENSMUSG00000037742	Eef1a1	protein_coding	603	cds	TAC	AGT	161	-301	chr9	78479990	78479988	-	34509	44.9807	38.3049	53.7306	24.102	11.3056	17.9188	53.3265	137.016	3	3	FALSE	0	FALSE	FALSE
ENSMUST00000042235	ENSMUSG00000037742	Eef1a1	protein_coding	672	cds	CCT	GAC	184	-278	chr9	78479921	78479919	-	34503	35.5787	34.2946	48.3255	30.4011	16.4724	43.7827	90.6562	118.199	3	3	FALSE	0	FALSE	FALSE
ENSMUST00000042235	ENSMUSG00000037742	Eef1a1	protein_coding	693	cds	CCA	ATT	191	-271	chr9	78479900	78479898	-	34500	35.4397	31.4196	35.7316	54.8291	43.0854	45.6788	143.593	102.591	3	3	FALSE	0	FALSE	FALSE
ENSMUST00000042235	ENSMUSG00000037742	Eef1a1	protein_coding	744	cds	CCT	TGG	208	-254	chr9	78479772	78479770	-	34495	16.6548	14.2412	21.0048	22.5706	11.6619	24.4368	58.6693	51.9008	3	3	FALSE	0	FALSE	FALSE
ENSMUST00000042235	ENSMUSG00000037742	Eef1a1	protein_coding	831	cds	CCA	ACT	237	-225	chr9	78479685	78479683	-	34490	40.851	30.4259	34.649	34.0774	17.1001	35.6415	86.819	105.926	3	3	FALSE	0	FALSE	FALSE
ENSMUST00000042235	ENSMUSG00000037742	Eef1a1	protein_coding	843	cds	ACT	GAC	241	-221	chr9	78479673	78479671	-	34487	27.8716	16.2134	24.9939	19.1599	16.9683	24.062	60.1902	69.0789	3	3	FALSE	0	FALSE	FALSE
ENSMUST00000042235	ENSMUSG00000037742	Eef1a1	protein_coding	948	cds	GTG	GTT	276	-186	chr9	78479479	78479477	-	34481	18.8038	21.3906	16.2232	45.8061	31.3614	32.3851	109.553	56.4177	3	3	FALSE	0	FALSE	TRUE
ENSMUST00000042235	ENSMUSG00000037742	Eef1a1	protein_coding	978	cds	ACT	GAA	286	-176	chr9	78479449	78479447	-	34479	27.1298	15.2294	30.6264	28.9075	21.2871	41.4719	91.6665	72.9856	3	3	FALSE	0	FALSE	TRUE
ENSMUST00000042235	ENSMUSG00000037742	Eef1a1	protein_coding	1011	cds	GCT	TTG	297	-165	chr9	78479416	78479414	-	34478	13.2458	10.2663	27.6848	17.5925	12.1736	21.8336	51.5997	51.197	3	3	FALSE	0	FALSE	TRUE
ENSMUST00000042235	ENSMUSG00000037742	Eef1a1	protein_coding	1017	cds	AGT	GAA	299	-163	chr9	78479410	78479408	-	34477	32.7082	41.9668	19.105	32.076	20.5927	34.1557	86.8244	93.78	3	3	FALSE	0	FALSE	TRUE
ENSMUST00000042235	ENSMUSG00000037742	Eef1a1	protein_coding	1032	cds	GGG	GAC	304	-158	chr9	78479395	78479393	-	34476	22.977	27.8182	10.2187	37.3975	25.9821	16.1643	79.5438	61.014	3	3	FALSE	0	FALSE	TRUE
ENSMUST00000042235	ENSMUSG00000037742	Eef1a1	protein_coding	1122	cds	ATG	GAA	334	-128	chr9	78479305	78479303	-	34473	56.7762	69.3436	59.4867	83.684	31.6083	57.6937	172.986	185.607	3	3	FALSE	0	FALSE	TRUE
ENSMUST00000042235	ENSMUSG00000037742	Eef1a1	protein_coding	1185	cds	GGC	TAC	355	-107	chr9	78479157	78479155	-	34467	10.1574	16.1208	14.546	16.786	19.5863	18.6114	54.9837	40.8242	3	3	FALSE	0	FALSE	TRUE
ENSMUST00000042235	ENSMUSG00000037742	Eef1a1	protein_coding	1218	cds	CAC	ATA	366	-96	chr9	78479124	78479122	-	34464	48.9194	48.5013	73.9036	45.0222	28.7083	48.5124	122.243	171.324	3	3	FALSE	0	FALSE	TRUE
ENSMUST00000042235	ENSMUSG00000037742	Eef1a1	protein_coding	1308	cds	GGC	GAT	396	-66	chr9	78479034	78479032	-	34460	38.1626	43.4199	73.0965	52.6183	16.227	40.7018	109.547	154.679	3	3	FALSE	0	FALSE	TRUE
ENSMUST00000042235	ENSMUSG00000037742	Eef1a1	protein_coding	1338	cds	GGC	AAG	406	-56	chr9	78479004	78479002	-	34457	37.1089	30.3999	53.4242	37.304	31.7892	44.4241	113.517	120.933	3	3	FALSE	0	FALSE	TRUE
ENSMUST00000042235	ENSMUSG00000037742	Eef1a1	protein_coding	1377	cds	CCA	CTT	419	-43	chr9	78478965	78478963	-	34454	55.2376	64.3449	41.0448	63.0215	24.4985	42.8838	130.404	160.627	3	3	FALSE	0	FALSE	TRUE
ENSMUST00000042235	ENSMUSG00000037742	Eef1a1	protein_coding	1503	cds	AAA	NA	461	-1	chr9	78478740	78478738	-	34447	114.227	128.76	118.555	153.957	178.559	152.209	484.726	361.543	3	3	TRUE	0	FALSE	TRUE
ENSMUST00000154207	ENSMUSG00000037742	Eef1a1	protein_coding	112	cds	ATG	GGA	0	-248	chr9	78480655	78480653	-	34538	125.894	126.663	105.588	136.6	38.3768	115.763	290.739	358.144	3	3	TRUE	0	FALSE	FALSE
ENSMUST00000154207	ENSMUSG00000037742	Eef1a1	protein_coding	130	cds	CAC	ATC	6	-242	chr9	78480637	78480635	-	34537	30.8867	35.4407	61.2352	49.101	23.9487	49.0834	122.133	127.563	3	3	FALSE	0	FALSE	FALSE
ENSMUST00000154207	ENSMUSG00000037742	Eef1a1	protein_coding	223	cds	ACC	ATC	37	-211	chr9	78480544	78480542	-	34530	31.0209	24.801	35.1048	59.6624	18.7429	76.0727	154.478	90.9268	3	3	FALSE	0	FALSE	FALSE
ENSMUST00000154207	ENSMUSG00000037742	Eef1a1	protein_coding	283	cds	TGG	GTC	57	-191	chr9	78480394	78480392	-	34529	66.2303	63.4192	73.9987	78.8064	33.9537	54.3642	167.124	203.648	3	3	FALSE	0	FALSE	FALSE
ENSMUST00000154207	ENSMUSG00000037742	Eef1a1	protein_coding	286	cds	GTC	TTA	58	-190	chr9	78480391	78480389	-	34528	34.5919	18.0371	41.7882	25.8218	17.4753	43.2515	86.5487	94.4173	3	3	FALSE	0	FALSE	FALSE
ENSMUST00000154207	ENSMUSG00000037742	Eef1a1	protein_coding	424	cds	GGC	ACA	104	-144	chr9	78480253	78480251	-	34519	26.8755	27.7489	38.5915	29.808	24.1753	30.9735	84.9568	93.2159	3	3	FALSE	0	FALSE	FALSE
ENSMUST00000154207	ENSMUSG00000037742	Eef1a1	protein_coding	511	cds	CGC	GAG	133	-115	chr9	78480074	78480072	-	34514	17.0946	22.6325	13.7668	35.5412	13.6103	26.324	75.4755	53.4939	3	3	FALSE	0	FALSE	FALSE
ENSMUST00000154207	ENSMUSG00000037742	Eef1a1	protein_coding	595	cds	TAC	AGT	161	-87	chr9	78479990	78479988	-	34509	46.5835	38.5778	54.3665	26.4757	12.7673	18.2479	57.4909	139.528	3	3	FALSE	0	FALSE	FALSE
ENSMUST00000154207	ENSMUSG00000037742	Eef1a1	protein_coding	664	cds	CCT	GAC	184	-64	chr9	78479921	78479919	-	34503	35.5787	34.2946	48.3255	30.4011	16.4724	43.7827	90.6562	118.199	3	3	FALSE	0	FALSE	FALSE
ENSMUST00000154207	ENSMUSG00000037742	Eef1a1	protein_coding	685	cds	CCA	ATT	191	-57	chr9	78479900	78479898	-	34500	35.4397	31.4196	35.7316	54.8291	43.0854	45.6788	143.593	102.591	3	3	FALSE	0	FALSE	FALSE
ENSMUST00000154207	ENSMUSG00000037742	Eef1a1	protein_coding	736	cds	CCT	TGG	208	-40	chr9	78479772	78479770	-	34495	17.8695	16.2604	21.3994	24.885	11.6619	24.4368	60.9837	55.5293	3	3	FALSE	0	FALSE	FALSE
ENSMUST00000154207	ENSMUSG00000037742	Eef1a1	protein_coding	823	cds	CCA	ACT	237	-11	chr9	78479685	78479683	-	34490	59.2396	52.0964	49.5489	58.4766	24.8997	49.0942	132.47	160.885	3	3	FALSE	0	FALSE	FALSE
ENSMUST00000154207	ENSMUSG00000037742	Eef1a1	protein_coding	835	cds	ACT	GAC	241	-7	chr9	78479673	78479671	-	34487	27.8716	16.2134	24.9939	19.1599	16.9683	24.062	60.1902	69.0789	3	3	FALSE	0	FALSE	FALSE
ENSMUST00000156988	ENSMUSG00000037742	Eef1a1	protein_coding	187	cds	ATG	GGA	0	-185	chr9	78480655	78480653	-	34538	125.894	126.663	105.588	136.6	38.3768	115.763	290.739	358.144	3	3	TRUE	0	FALSE	FALSE
ENSMUST00000156988	ENSMUSG00000037742	Eef1a1	protein_coding	205	cds	CAC	ATC	6	-179	chr9	78480637	78480635	-	34537	30.8867	35.4407	61.2352	49.101	23.9487	49.0834	122.133	127.563	3	3	FALSE	0	FALSE	FALSE
ENSMUST00000156988	ENSMUSG00000037742	Eef1a1	protein_coding	298	cds	ACC	ATC	37	-148	chr9	78480544	78480542	-	34530	31.6447	25.8676	35.8016	60.8688	20.5968	77.6276	159.093	93.314	3	3	FALSE	0	FALSE	FALSE
ENSMUST00000156988	ENSMUSG00000037742	Eef1a1	protein_coding	358	cds	TGG	GTC	57	-128	chr9	78480394	78480392	-	34529	66.2303	63.4192	75.0978	80.1981	36.5065	55.603	172.308	204.747	3	3	FALSE	0	FALSE	FALSE
ENSMUST00000156988	ENSMUSG00000037742	Eef1a1	protein_coding	361	cds	GTC	TTA	58	-127	chr9	78480391	78480389	-	34528	34.5919	18.0371	41.7882	25.8218	19.271	44.3286	89.4214	94.4173	3	3	FALSE	0	FALSE	FALSE
ENSMUST00000156988	ENSMUSG00000037742	Eef1a1	protein_coding	499	cds	GGC	ACA	104	-81	chr9	78480253	78480251	-	34519	26.8755	27.7489	38.5915	29.808	26.1975	30.9735	86.9791	93.2159	3	3	FALSE	0	FALSE	FALSE
ENSMUST00000156988	ENSMUSG00000037742	Eef1a1	protein_coding	586	cds	CGC	GAG	133	-52	chr9	78480074	78480072	-	34514	17.0946	22.6325	13.7668	35.5412	13.6103	26.6998	75.8513	53.4939	3	3	FALSE	0	FALSE	FALSE
ENSMUST00000156988	ENSMUSG00000037742	Eef1a1	protein_coding	670	cds	TAC	AGT	161	-24	chr9	78479990	78479988	-	34509	46.5835	38.5778	55.2626	27.2647	14.3466	18.961	60.5723	140.424	3	3	FALSE	0	FALSE	FALSE
ENSMUST00000020118	ENSMUSG00000019960	Dusp6	protein_coding	1601	cds	ACG	NA	380	-1	chr10	99266293	99266295	+	3717	96.2086	84.3546	110.492	69.0878	36.8849	91.5767	197.549	291.055	3	3	TRUE	0	FALSE	TRUE
ENSMUST00000114050	ENSMUSG00000079523	Tmsb10	protein_coding	167	cds	GCA	GAC	1	-43	chr6	72958010	72958008	-	27602	45.0927	42.7069	74.2295	40.3418	12.4057	39.6588	92.4063	162.029	3	3	TRUE	0	FALSE	FALSE
ENSMUST00000114050	ENSMUSG00000079523	Tmsb10	protein_coding	185	cds	GGG	GAA	7	-37	chr6	72957992	72957990	-	27600	19.7073	11.9153	10.9936	13.9577	12.7861	27.1065	53.8503	42.6162	3	3	FALSE	0	FALSE	FALSE
ENSMUST00000114050	ENSMUSG00000079523	Tmsb10	protein_coding	203	cds	GAT	AAG	13	-31	chr6	72957974	72957972	-	27599	16.6537	16.4245	28.355	10.527	11.7716	24.2136	46.5122	61.4332	3	3	FALSE	0	FALSE	FALSE
ENSMUST00000114050	ENSMUSG00000079523	Tmsb10	protein_coding	293	cds	TCC	NA	43	-1	chr6	72957624	72957622	-	27595	53.836	105.12	27.4403	81.3076	77.7172	51.5954	210.62	186.396	3	3	TRUE	0	FALSE	FALSE
ENSMUST00000114049	ENSMUSG00000079523	Tmsb10	protein_coding	293	cds	GCA	GAC	1	-43	chr6	72958010	72958008	-	27602	45.0927	42.7069	74.2295	40.3418	12.4057	39.6588	92.4063	162.029	3	3	TRUE	0	FALSE	FALSE
ENSMUST00000114049	ENSMUSG00000079523	Tmsb10	protein_coding	311	cds	GGG	GAA	7	-37	chr6	72957992	72957990	-	27600	19.7179	11.9153	11.002	13.9577	12.7861	27.1065	53.8503	42.6352	3	3	FALSE	0	FALSE	FALSE
ENSMUST00000114049	ENSMUSG00000079523	Tmsb10	protein_coding	329	cds	GAT	AAG	13	-31	chr6	72957974	72957972	-	27599	16.6537	16.4245	28.355	10.527	11.7716	24.2136	46.5122	61.4332	3	3	FALSE	0	FALSE	FALSE
ENSMUST00000114049	ENSMUSG00000079523	Tmsb10	protein_coding	419	cds	TCC	NA	43	-1	chr6	72957624	72957622	-	27595	53.836	105.12	27.4403	81.3076	77.7172	51.5954	210.62	186.396	3	3	TRUE	0	FALSE	FALSE
ENSMUST00000114048	ENSMUSG00000079523	Tmsb10	protein_coding	234	cds	GCA	GAC	1	-43	chr6	72958010	72958008	-	27602	45.0927	42.7069	74.2295	40.3418	12.4057	39.6588	92.4063	162.029	3	3	TRUE	0	FALSE	FALSE
ENSMUST00000114048	ENSMUSG00000079523	Tmsb10	protein_coding	252	cds	GGG	GAA	7	-37	chr6	72957992	72957990	-	27600	19.7073	11.9153	10.9936	13.9577	12.7861	27.1065	53.8503	42.6162	3	3	FALSE	0	FALSE	FALSE
ENSMUST00000114048	ENSMUSG00000079523	Tmsb10	protein_coding	270	cds	GAT	AAG	13	-31	chr6	72957974	72957972	-	27599	16.6537	16.4245	28.355	10.527	11.7716	24.2136	46.5122	61.4332	3	3	FALSE	0	FALSE	FALSE
ENSMUST00000114048	ENSMUSG00000079523	Tmsb10	protein_coding	360	cds	TCC	NA	43	-1	chr6	72957624	72957622	-	27595	53.836	105.12	27.4403	81.3076	77.7172	51.5954	210.62	186.396	3	3	TRUE	0	FALSE	FALSE
ENSMUST00000144337	ENSMUSG00000079523	Tmsb10	protein_coding	78	cds	GCA	GAC	1	-66	chr6	72958010	72958008	-	27602	46.0254	47.0483	87.6699	47.8148	14.9142	47.1731	109.902	180.744	3	3	TRUE	0	FALSE	FALSE
ENSMUST00000144337	ENSMUSG00000079523	Tmsb10	protein_coding	96	cds	GGG	GAA	7	-60	chr6	72957992	72957990	-	27600	19.7073	11.9153	10.9936	13.9577	14.1829	27.1065	55.2471	42.6162	3	3	FALSE	0	FALSE	FALSE
ENSMUST00000144337	ENSMUSG00000079523	Tmsb10	protein_coding	114	cds	GAT	AAG	13	-54	chr6	72957974	72957972	-	27599	16.6537	19.5838	30.7226	13.2093	13.8916	24.2136	51.3145	66.96	3	3	FALSE	0	FALSE	FALSE
ENSMUST00000074733	ENSMUSG00000058013	Septin11	protein_coding	371	cds	TTA	AAA	79	-350	chr5	93148501	93148503	+	25428	18.6352	21.7613	12.8826	20.5939	14.5833	19.7906	54.9678	53.2791	3	3	FALSE	0	FALSE	TRUE
ENSMUST00000074733	ENSMUSG00000058013	Septin11	protein_coding	413	cds	CTG	AAG	93	-336	chr5	93148543	93148545	+	25429	39.8777	67.7338	50.6133	67.3561	42.7093	35.1274	145.193	158.225	3	3	FALSE	0	FALSE	TRUE
ENSMUST00000074733	ENSMUSG00000058013	Septin11	protein_coding	1418	cds	GCA	NA	428	-1	chr5	93171368	93171370	+	25441	76.1593	70.7871	64.2093	110.322	45.6525	110.961	266.936	211.156	3	3	TRUE	0	FALSE	TRUE
ENSMUST00000029610	ENSMUSG00000027984	Hadh	protein_coding	94	cds	ATG	GCG	0	-314	chr3	131272008	131272006	-	22325	36.8029	32.7234	17.9631	34.101	22.3917	29.3181	85.8108	87.4894	3	3	TRUE	0	FALSE	TRUE
ENSMUST00000002825	ENSMUSG00000002748	Baz1b	protein_coding	4466	cds	CGG	GAG	1360	-119	chr5	135243910	135243912	+	26082	15.2998	17.9353	10.7795	30.8031	25.5737	29.0718	85.4485	44.0146	3	3	FALSE	0	FALSE	TRUE
ENSMUST00000059080	ENSMUSG00000039001	Rps21	protein_coding	56	5utr	NA	NA	-29	-280	chr2	180257432	180257434	+	20708	82.0758	91.8897	66.3238	104.366	107.7	152.161	364.227	240.289	3	3	FALSE	0	FALSE	TRUE
ENSMUST00000059080	ENSMUSG00000039001	Rps21	protein_coding	84	cds	ATG	CAG	0	-83	chr2	180257633	180257635	+	20709	40.0248	110.501	22.1208	76.6466	42.8162	37.3122	156.775	172.646	3	3	TRUE	0	FALSE	TRUE
ENSMUST00000032168	ENSMUSG00000030082	Sec61a1	protein_coding	213	cds	ATG	GCG	0	-476	chr6	88518693	88518691	-	27904	64.3678	78.5684	63.5931	87.2185	26.2686	48.365	161.852	206.529	3	3	TRUE	0	FALSE	TRUE
ENSMUST00000032168	ENSMUSG00000030082	Sec61a1	protein_coding	630	cds	CCT	TCG	139	-337	chr6	88512541	88512539	-	27898	12.5953	18.7063	23.9611	23.7251	21.2958	19.3481	64.369	55.2628	3	3	FALSE	0	FALSE	TRUE
ENSMUST00000023099	ENSMUSG00000022462	Slc38a2	protein_coding	410	cds	ATG	AAG	0	-504	chr15	96698699	96698697	-	12609	43.1783	48.9904	43.4193	50.5642	11.1446	27.5948	89.3036	135.588	3	3	TRUE	0	FALSE	TRUE
ENSMUST00000023099	ENSMUSG00000022462	Slc38a2	protein_coding	908	cds	TTC	ATA	166	-338	chr15	96695046	96695044	-	12605	14.781	15.5981	17.8907	14.9442	11	23.1538	49.098	48.2698	3	3	FALSE	0	FALSE	TRUE
ENSMUST00000023099	ENSMUSG00000022462	Slc38a2	protein_coding	1919	cds	CAC	NA	503	-1	chr15	96690101	96690099	-	12600	26.3861	37.9804	38.3121	41.9147	19.0526	39.0161	99.9833	102.679	3	3	TRUE	0	FALSE	TRUE
ENSMUST00000023101	ENSMUSG00000022464	Slc38a4	protein_coding	652	cds	CCT	GAA	177	-370	chr15	97010328	97010326	-	12617	12.984	10.1857	25.1239	14.0402	16.4638	23.0813	53.5854	48.2935	3	3	FALSE	0	FALSE	FALSE
ENSMUST00000166223	ENSMUSG00000022464	Slc38a4	protein_coding	570	cds	CCT	GAA	177	-370	chr15	97010328	97010326	-	12617	12.984	10.1887	25.1239	14.0402	16.4638	23.0813	53.5854	48.2966	3	3	FALSE	0	FALSE	FALSE
ENSMUST00000001147	ENSMUSG00000001119	Col6a1	protein_coding	3327	cds	GGC	NA	1024	-1	chr10	76709565	76709563	-	2996	41.1308	37.6598	72.6582	65.3352	46.3744	82.6847	194.394	151.449	3	3	TRUE	0	FALSE	TRUE
ENSMUST00000028222	ENSMUSG00000026864	Hspa5	protein_coding	217	5utr	NA	NA	-54	-2021	chr2	34772268	34772270	+	18813	43.8648	37.6196	30.6662	49.5343	36.951	59.9957	146.481	112.151	3	3	FALSE	0	FALSE	FALSE
ENSMUST00000028222	ENSMUSG00000026864	Hspa5	protein_coding	270	cds	ATG	ATG	0	-655	chr2	34772321	34772323	+	18814	91.9678	104.962	85.8752	89.5449	38.7915	52.7962	181.133	282.805	3	3	TRUE	0	FALSE	FALSE
ENSMUST00000028222	ENSMUSG00000026864	Hspa5	protein_coding	273	cds	ATG	AAG	1	-654	chr2	34772324	34772326	+	18815	27.3661	25.2569	17.7604	31.1704	17.7391	22.2514	71.1609	70.3834	3	3	TRUE	0	FALSE	FALSE
ENSMUST00000028222	ENSMUSG00000026864	Hspa5	protein_coding	555	cds	GCC	AAG	95	-560	chr2	34772718	34772720	+	18820	17.5775	21.688	25.0219	21.4572	11.1044	25.3978	57.9594	64.2873	3	3	FALSE	0	FALSE	FALSE
ENSMUST00000028222	ENSMUSG00000026864	Hspa5	protein_coding	948	cds	GGT	GGC	226	-429	chr2	34774097	34774099	+	18839	18.9963	19.0541	22.9052	36.1975	20.6493	18.5983	75.445	60.9557	3	3	FALSE	0	FALSE	FALSE
ENSMUST00000028222	ENSMUSG00000026864	Hspa5	protein_coding	1158	cds	AAG	AGA	296	-359	chr2	34774307	34774309	+	18844	19.3486	20.588	21.6705	36.0525	21.1752	28.1977	85.4253	61.6071	3	3	FALSE	0	FALSE	FALSE
ENSMUST00000028222	ENSMUSG00000026864	Hspa5	protein_coding	2085	cds	CTG	GAA	605	-50	chr2	34775960	34775962	+	18866	18.7412	24.4417	35.1092	28.2938	12.5988	32.4015	73.2941	78.2921	3	3	FALSE	0	FALSE	FALSE
ENSMUST00000028222	ENSMUSG00000026864	Hspa5	protein_coding	2166	cds	AGC	AAA	632	-23	chr2	34776041	34776043	+	18871	23.7787	20.5731	21.9933	19.63	17.3925	11.6873	48.7099	66.3451	3	3	FALSE	0	FALSE	FALSE
ENSMUST00000100171	ENSMUSG00000026864	Hspa5	protein_coding	174	5utr	NA	NA	-54	-2021	chr2	34772268	34772270	+	18813	43.8648	37.6196	30.6662	49.5343	36.951	59.9957	146.481	112.151	3	3	FALSE	0	FALSE	FALSE
ENSMUST00000100171	ENSMUSG00000026864	Hspa5	protein_coding	227	cds	ATG	ATG	0	-655	chr2	34772321	34772323	+	18814	91.9678	104.962	85.8752	89.5449	38.7915	52.7962	181.133	282.805	3	3	TRUE	0	FALSE	FALSE
ENSMUST00000100171	ENSMUSG00000026864	Hspa5	protein_coding	230	cds	ATG	AAG	1	-654	chr2	34772324	34772326	+	18815	27.3661	25.2569	17.7604	31.1704	17.7391	22.2514	71.1609	70.3834	3	3	TRUE	0	FALSE	FALSE
ENSMUST00000100171	ENSMUSG00000026864	Hspa5	protein_coding	512	cds	GCC	AAG	95	-560	chr2	34772718	34772720	+	18820	17.5775	21.688	25.0219	21.4572	11.1044	25.3978	57.9594	64.2873	3	3	FALSE	0	FALSE	FALSE
ENSMUST00000100171	ENSMUSG00000026864	Hspa5	protein_coding	905	cds	GGT	GGC	226	-429	chr2	34774097	34774099	+	18839	18.9963	19.0541	22.9052	36.1975	20.6493	18.5983	75.445	60.9557	3	3	FALSE	0	FALSE	FALSE
ENSMUST00000100171	ENSMUSG00000026864	Hspa5	protein_coding	1115	cds	AAG	AGA	296	-359	chr2	34774307	34774309	+	18844	19.3486	20.588	21.6705	36.0525	21.1752	28.1977	85.4253	61.6071	3	3	FALSE	0	FALSE	FALSE
ENSMUST00000100171	ENSMUSG00000026864	Hspa5	protein_coding	2042	cds	CTG	GAA	605	-50	chr2	34775960	34775962	+	18866	18.7412	24.4417	35.1092	28.2938	12.5988	32.4015	73.2941	78.2921	3	3	FALSE	0	FALSE	FALSE
ENSMUST00000100171	ENSMUSG00000026864	Hspa5	protein_coding	2123	cds	AGC	AAA	632	-23	chr2	34776041	34776043	+	18871	23.7787	20.5731	21.9933	19.63	17.3925	11.6873	48.7099	66.3451	3	3	FALSE	0	FALSE	FALSE
ENSMUST00000137145	ENSMUSG00000026864	Hspa5	nonsense_mediated_decay	18	5utr	NA	NA	-124	-252	chr2	34772116	34772118	+	18812	31.3634	20.1778	34.4193	31.0742	11.4048	15.5576	58.0367	85.9605	3	3	FALSE	0	FALSE	FALSE
ENSMUST00000137145	ENSMUSG00000026864	Hspa5	nonsense_mediated_decay	88	5utr	NA	NA	-54	-182	chr2	34772268	34772270	+	18813	47.6774	38.8665	38.4013	55.3463	45.9138	75.6821	176.942	124.945	3	3	FALSE	0	FALSE	FALSE
ENSMUST00000137145	ENSMUSG00000026864	Hspa5	nonsense_mediated_decay	141	cds	ATG	ATG	0	-42	chr2	34772321	34772323	+	18814	99.1443	107.911	103.999	99.1414	48.13	66.8474	214.119	311.054	3	3	TRUE	0	FALSE	FALSE
ENSMUST00000137145	ENSMUSG00000026864	Hspa5	nonsense_mediated_decay	144	cds	ATG	AAG	1	-41	chr2	34772324	34772326	+	18815	27.3661	25.2569	17.7604	31.1704	17.7391	22.2514	71.1609	70.3834	3	3	TRUE	0	FALSE	FALSE
ENSMUST00000135009	ENSMUSG00000032332	Col12a1	protein_coding	270	cds	GGG	AGA	90	-223	chr9	79605220	79605330	-	34576	13.449	20.6616	14.7308	15.4934	11.5049	20.6809	47.6792	48.8415	3	3	FALSE	0	FALSE	FALSE
ENSMUST00000071750	ENSMUSG00000032332	Col12a1	protein_coding	115	5utr	NA	NA	-21	-9218	chr9	79715457	79715455	-	34702	61.9837	50.0656	83.2432	72.0661	50.619	87.8807	210.566	195.293	3	3	FALSE	0	FALSE	FALSE
ENSMUST00000071750	ENSMUSG00000032332	Col12a1	protein_coding	135	cds	ATG	CAG	0	-3065	chr9	79715437	79715435	-	34701	49.1761	39.7962	49.6669	40.7358	47.2795	41.092	129.107	138.639	3	3	TRUE	0	FALSE	FALSE
ENSMUST00000071750	ENSMUSG00000032332	Col12a1	protein_coding	840	cds	GGC	TCA	235	-2830	chr9	79703416	79703414	-	34693	15.9628	25.7516	24.2113	22.7597	23.5956	32.7626	79.118	65.9257	3	3	FALSE	0	FALSE	FALSE
ENSMUST00000071750	ENSMUSG00000032332	Col12a1	protein_coding	1143	cds	CCT	TCA	336	-2729	chr9	79700537	79700535	-	34689	24.1098	31.3323	30.7796	48.9414	18.0589	14.0865	81.0867	86.2216	3	3	FALSE	0	FALSE	FALSE
ENSMUST00000071750	ENSMUSG00000032332	Col12a1	protein_coding	1512	cds	CGA	GCC	459	-2606	chr9	79699763	79699761	-	34681	13.2605	19.6127	22.2414	23.6789	10.8959	27.1222	61.697	55.1146	3	3	FALSE	0	FALSE	FALSE
ENSMUST00000071750	ENSMUSG00000032332	Col12a1	protein_coding	1701	cds	ATG	ACT	522	-2543	chr9	79699574	79699572	-	34679	14.8928	15.9616	10.185	18.1025	10.9602	23.1282	52.1909	41.0394	3	3	FALSE	0	FALSE	FALSE
ENSMUST00000071750	ENSMUSG00000032332	Col12a1	protein_coding	1815	cds	GCT	ATA	560	-2505	chr9	79699460	79699458	-	34676	25.1883	25.6485	27.5772	25.3711	24.5704	30.5713	80.5128	78.414	3	3	FALSE	0	FALSE	FALSE
ENSMUST00000071750	ENSMUSG00000032332	Col12a1	protein_coding	2145	cds	GGT	GAT	670	-2395	chr9	79697555	79697553	-	34670	14.6117	20.1301	17.4855	19.103	19.2296	22.2509	60.5836	52.2272	3	3	FALSE	0	FALSE	FALSE
ENSMUST00000071750	ENSMUSG00000032332	Col12a1	protein_coding	2901	cds	GCC	TAT	922	-2143	chr9	79684411	79684409	-	34662	12.5458	13.7794	18.5724	16.5775	15.1736	13.5154	45.2666	44.8976	3	3	FALSE	0	FALSE	FALSE
ENSMUST00000071750	ENSMUSG00000032332	Col12a1	protein_coding	3393	cds	TTT	AAA	1086	-1979	chr9	79681574	79681572	-	34655	46.5798	44.4916	95.2871	45.4684	41.0437	61.7353	148.247	186.358	3	3	FALSE	0	FALSE	FALSE
ENSMUST00000071750	ENSMUSG00000032332	Col12a1	protein_coding	3789	cds	CGA	AGC	1218	-1847	chr9	79678522	79678520	-	34648	11.6444	11.9151	10.2051	11.012	10.7599	15.3425	37.1144	33.7646	3	3	FALSE	0	FALSE	FALSE
ENSMUST00000071750	ENSMUSG00000032332	Col12a1	protein_coding	4281	cds	GGT	GAC	1382	-1683	chr9	79674820	79677158	-	34638	19.885	21.4322	13.7957	17.6188	18.7083	14.8301	51.1572	55.1129	3	3	FALSE	0	FALSE	FALSE
ENSMUST00000071750	ENSMUSG00000032332	Col12a1	protein_coding	4347	cds	TGG	ACA	1404	-1661	chr9	79674756	79674754	-	34635	12.8464	12.2654	13.0678	19.6708	11.1727	14.0036	44.847	38.1796	3	3	FALSE	0	FALSE	FALSE
ENSMUST00000071750	ENSMUSG00000032332	Col12a1	protein_coding	5793	cds	CCA	GAA	1886	-1179	chr9	79651947	79651945	-	34616	13.3707	15.8855	15.7144	16.0415	20.6667	22.9784	59.6865	44.9706	3	3	FALSE	0	FALSE	FALSE
ENSMUST00000071750	ENSMUSG00000032332	Col12a1	protein_coding	5904	cds	GGC	GGG	1923	-1142	chr9	79651413	79651411	-	34612	18.1146	15.3683	26.5468	22.3355	19.3112	17.9566	59.6033	60.0297	3	3	FALSE	0	FALSE	FALSE
ENSMUST00000071750	ENSMUSG00000032332	Col12a1	protein_coding	6537	cds	CGA	GTG	2134	-931	chr9	79643931	79643929	-	34605	58.5329	72.8958	43.0029	75.7959	61.3834	77.2041	214.383	174.432	3	3	FALSE	0	FALSE	FALSE
ENSMUST00000071750	ENSMUSG00000032332	Col12a1	protein_coding	7035	cds	ACA	GAA	2300	-765	chr9	79638499	79638497	-	34599	46.9463	36.56	38.5643	34.5195	19.2909	29.0818	82.8922	122.071	3	3	FALSE	0	FALSE	FALSE
ENSMUST00000071750	ENSMUSG00000032332	Col12a1	protein_coding	7836	cds	GCA	GAA	2567	-498	chr9	79630484	79630482	-	34591	22.1571	12.5001	27.1958	16.4099	15.7386	18.5313	50.6798	61.8531	3	3	FALSE	0	FALSE	FALSE
ENSMUST00000071750	ENSMUSG00000032332	Col12a1	protein_coding	8052	cds	GAT	GAA	2639	-426	chr9	79627028	79627026	-	34590	20.0008	12.4129	29.4185	24.3248	10.068	24.926	59.3188	61.8323	3	3	FALSE	0	FALSE	FALSE
ENSMUST00000071750	ENSMUSG00000032332	Col12a1	protein_coding	8358	cds	ACG	TGT	2741	-324	chr9	79616071	79616069	-	34586	12.5011	10.8321	20.2434	13.252	10.545	27.9033	51.7003	43.5766	3	3	FALSE	0	FALSE	FALSE
ENSMUST00000121227	ENSMUSG00000032332	Col12a1	protein_coding	317	5utr	NA	NA	-21	-9215	chr9	79715457	79715455	-	34702	61.9837	50.0656	83.5017	72.3241	50.7617	88.1791	211.265	195.551	3	3	FALSE	0	FALSE	FALSE
ENSMUST00000121227	ENSMUSG00000032332	Col12a1	protein_coding	337	cds	ATG	CAG	0	-3064	chr9	79715437	79715435	-	34701	49.1761	39.9858	49.83	40.8929	47.4136	41.2422	129.549	138.992	3	3	TRUE	0	FALSE	FALSE
ENSMUST00000121227	ENSMUSG00000032332	Col12a1	protein_coding	1042	cds	GGC	TCA	235	-2829	chr9	79703416	79703414	-	34693	15.9628	25.7516	24.2113	22.7597	23.5956	32.7626	79.118	65.9257	3	3	FALSE	0	FALSE	FALSE
ENSMUST00000121227	ENSMUSG00000032332	Col12a1	protein_coding	1345	cds	CCT	TCA	336	-2728	chr9	79700537	79700535	-	34689	24.1098	31.4883	30.7796	49.1249	18.1177	14.1512	81.3938	86.3776	3	3	FALSE	0	FALSE	FALSE
ENSMUST00000121227	ENSMUSG00000032332	Col12a1	protein_coding	1714	cds	CGA	GCC	459	-2605	chr9	79699763	79699761	-	34681	13.2605	19.6127	22.2414	23.6789	10.8959	27.1222	61.697	55.1146	3	3	FALSE	0	FALSE	FALSE
ENSMUST00000121227	ENSMUSG00000032332	Col12a1	protein_coding	1903	cds	ATG	ACT	522	-2542	chr9	79699574	79699572	-	34679	14.8928	15.9616	10.185	18.1025	10.9602	23.1282	52.1909	41.0394	3	3	FALSE	0	FALSE	FALSE
ENSMUST00000121227	ENSMUSG00000032332	Col12a1	protein_coding	2017	cds	GCT	ATA	560	-2504	chr9	79699460	79699458	-	34676	25.1883	25.6485	27.5772	25.3711	24.5704	30.5713	80.5128	78.414	3	3	FALSE	0	FALSE	FALSE
ENSMUST00000121227	ENSMUSG00000032332	Col12a1	protein_coding	2347	cds	GGT	GAT	670	-2394	chr9	79697555	79697553	-	34670	14.7002	20.2416	17.4855	19.1904	19.2296	22.3415	60.7616	52.4273	3	3	FALSE	0	FALSE	FALSE
ENSMUST00000121227	ENSMUSG00000032332	Col12a1	protein_coding	3103	cds	GCC	TAT	922	-2142	chr9	79684411	79684409	-	34662	12.5458	13.7794	18.5724	16.5775	15.1736	13.5154	45.2666	44.8976	3	3	FALSE	0	FALSE	FALSE
ENSMUST00000121227	ENSMUSG00000032332	Col12a1	protein_coding	3595	cds	TTT	AAA	1086	-1978	chr9	79681574	79681572	-	34655	46.5798	44.4916	95.2871	45.4684	41.0437	61.7353	148.247	186.358	3	3	FALSE	0	FALSE	FALSE
ENSMUST00000121227	ENSMUSG00000032332	Col12a1	protein_coding	3991	cds	CGA	AGC	1218	-1846	chr9	79678522	79678520	-	34648	11.6444	11.9941	10.2051	11.012	10.7599	15.4112	37.1831	33.8436	3	3	FALSE	0	FALSE	FALSE
ENSMUST00000121227	ENSMUSG00000032332	Col12a1	protein_coding	4483	cds	GGT	GAC	1382	-1682	chr9	79674820	79677158	-	34638	19.885	21.4322	13.7957	17.6188	18.7083	14.8301	51.1572	55.1129	3	3	FALSE	0	FALSE	FALSE
ENSMUST00000121227	ENSMUSG00000032332	Col12a1	protein_coding	4549	cds	TGG	ACA	1404	-1660	chr9	79674756	79674754	-	34635	12.8464	12.2654	13.0678	19.6708	11.1727	14.0036	44.847	38.1796	3	3	FALSE	0	FALSE	FALSE
ENSMUST00000121227	ENSMUSG00000032332	Col12a1	protein_coding	5995	cds	CCA	GAA	1886	-1178	chr9	79651947	79651945	-	34616	13.3707	15.8855	15.7144	16.0415	20.6667	22.9784	59.6865	44.9706	3	3	FALSE	0	FALSE	FALSE
ENSMUST00000121227	ENSMUSG00000032332	Col12a1	protein_coding	6106	cds	GGC	GGG	1923	-1141	chr9	79651413	79651411	-	34612	18.2172	15.3683	26.5468	22.4333	19.3732	17.9566	59.7631	60.1323	3	3	FALSE	0	FALSE	FALSE
ENSMUST00000121227	ENSMUSG00000032332	Col12a1	protein_coding	6739	cds	CGA	GTG	2134	-930	chr9	79643931	79643929	-	34605	58.7978	72.8958	43.1471	76.0659	61.3834	77.4686	214.918	174.841	3	3	FALSE	0	FALSE	FALSE
ENSMUST00000121227	ENSMUSG00000032332	Col12a1	protein_coding	7237	cds	ACA	GAA	2300	-764	chr9	79638499	79638497	-	34599	47.1647	36.7368	38.5643	34.6566	19.2909	29.0818	83.0293	122.466	3	3	FALSE	0	FALSE	FALSE
ENSMUST00000121227	ENSMUSG00000032332	Col12a1	protein_coding	8038	cds	GCA	GAA	2567	-497	chr9	79630484	79630482	-	34591	22.1571	12.5001	27.1958	16.4099	15.7386	18.5313	50.6798	61.8531	3	3	FALSE	0	FALSE	FALSE
ENSMUST00000121227	ENSMUSG00000032332	Col12a1	protein_coding	8254	cds	GAT	GAA	2639	-425	chr9	79627028	79627026	-	34590	20.1109	12.4939	29.5241	24.429	10.068	24.926	59.423	62.129	3	3	FALSE	0	FALSE	FALSE
ENSMUST00000121227	ENSMUSG00000032332	Col12a1	protein_coding	8560	cds	ACG	TGT	2741	-323	chr9	79616071	79616069	-	34586	12.5011	10.8321	20.2434	13.252	10.5845	28.0117	51.8482	43.5766	3	3	FALSE	0	FALSE	FALSE
ENSMUST00000114059	ENSMUSG00000016382	Pls3	protein_coding	1487	cds	CCA	TAC	448	-182	chrX	75794210	75794208	-	36455	24.5291	39.0817	13.2193	33.303	37.7525	32.3877	103.443	76.8301	3	3	FALSE	0	FALSE	FALSE
ENSMUST00000114059	ENSMUSG00000016382	Pls3	protein_coding	2030	cds	GTG	NA	629	-1	chrX	75786773	75786771	-	36448	17.3378	14.8454	14.7233	11.9405	17.3733	25.5032	54.8169	46.9065	3	3	TRUE	0	FALSE	FALSE
ENSMUST00000114058	ENSMUSG00000016382	Pls3	protein_coding	1379	cds	CCA	TAC	457	-182	chrX	75794210	75794208	-	36455	25.1946	40.0778	13.6626	34.1179	38.5688	32.9945	105.681	78.9351	3	3	FALSE	0	FALSE	FALSE
ENSMUST00000114058	ENSMUSG00000016382	Pls3	protein_coding	1922	cds	GTG	NA	638	-1	chrX	75786773	75786771	-	36448	17.8496	15.3207	15.2003	12.3169	17.791	25.9996	56.1074	48.3705	3	3	TRUE	0	FALSE	FALSE
ENSMUST00000033547	ENSMUSG00000016382	Pls3	protein_coding	1589	cds	CCA	TAC	448	-182	chrX	75794210	75794208	-	36455	24.5892	39.2875	13.2493	33.4365	37.917	32.4312	103.785	77.1261	3	3	FALSE	0	FALSE	FALSE
ENSMUST00000033547	ENSMUSG00000016382	Pls3	protein_coding	2132	cds	GTG	NA	629	-1	chrX	75786773	75786771	-	36448	17.384	14.9438	14.7556	12.0023	17.4575	25.5387	54.9985	47.0834	3	3	TRUE	0	FALSE	FALSE
ENSMUST00000114057	ENSMUSG00000016382	Pls3	protein_coding	1512	cds	CCA	TAC	448	-182	chrX	75794210	75794208	-	36455	24.5892	39.2848	13.2493	33.4335	37.917	32.4312	103.782	77.1233	3	3	FALSE	0	FALSE	FALSE
ENSMUST00000114057	ENSMUSG00000016382	Pls3	protein_coding	2055	cds	GTG	NA	629	-1	chrX	75786773	75786771	-	36448	17.384	14.9424	14.7556	12.0009	17.4575	25.5387	54.9971	47.082	3	3	TRUE	0	FALSE	FALSE
ENSMUST00000137192	ENSMUSG00000016382	Pls3	protein_coding	1455	cds	CCA	TAC	448	-181	chrX	75794210	75794208	-	36455	24.7285	39.4498	13.3155	33.5726	38.1848	32.6747	104.432	77.4938	3	3	FALSE	0	FALSE	FALSE
ENSMUST00000139651	ENSMUSG00000065990	Aurkaip1	protein_coding	218	cds	ATG	TTC	0	-147	chr4	155832015	155832017	+	24573	15.8796	28.0952	22.3908	18	11.5813	15.7014	45.2827	66.3656	3	3	TRUE	0	FALSE	FALSE
ENSMUST00000084097	ENSMUSG00000065990	Aurkaip1	protein_coding	418	cds	ATG	TTC	0	-200	chr4	155832015	155832017	+	24573	15.8796	28.0952	22.3908	18	10.8247	15.7014	44.5261	66.3656	3	3	TRUE	0	FALSE	FALSE
ENSMUST00000105592	ENSMUSG00000065990	Aurkaip1	protein_coding	357	cds	ATG	TTC	0	-200	chr4	155832015	155832017	+	24573	15.8796	28.0952	22.3908	18	10.8247	15.7014	44.5261	66.3656	3	3	TRUE	0	FALSE	FALSE
ENSMUST00000105591	ENSMUSG00000065990	Aurkaip1	protein_coding	131	cds	ATG	TTC	0	-200	chr4	155832015	155832017	+	24573	15.8796	28.0952	22.3908	18	10.8247	15.7014	44.5261	66.3656	3	3	TRUE	0	FALSE	FALSE
ENSMUST00000056110	ENSMUSG00000040856	Dlk1	protein_coding	1089	cds	GGG	GGT	190	-195	chr12	109459772	109459774	+	8528	22.3283	14.2033	24.3727	23.0117	21.1164	15.0273	59.1554	60.9043	3	3	FALSE	0	FALSE	FALSE
ENSMUST00000056110	ENSMUSG00000040856	Dlk1	protein_coding	1236	cds	CCG	TTC	239	-146	chr12	109459919	109459921	+	8534	17.4358	17.7097	12.8226	43.2334	19.8806	18.6195	81.7335	47.9681	3	3	FALSE	0	FALSE	FALSE
ENSMUST00000056110	ENSMUSG00000040856	Dlk1	protein_coding	1671	cds	ATC	NA	384	-1	chr12	109460354	109460356	+	8547	16.6604	13.8487	24.3727	30.6547	27.542	28.5791	86.7758	54.8818	3	3	TRUE	0	FALSE	FALSE
ENSMUST00000109844	ENSMUSG00000040856	Dlk1	protein_coding	274	cds	GCT	GAA	23	-362	chr12	109454986	109454988	+	8524	15.1715	21.0061	11.1427	40.2342	17.25	13.5661	71.0503	47.3203	3	3	FALSE	0	FALSE	FALSE
ENSMUST00000109844	ENSMUSG00000040856	Dlk1	protein_coding	775	cds	GGG	GGT	190	-195	chr12	109459772	109459774	+	8528	20.9174	16.4502	22.4018	19.1653	17.25	15.702	52.1173	59.7694	3	3	FALSE	0	FALSE	FALSE
ENSMUST00000109844	ENSMUSG00000040856	Dlk1	protein_coding	922	cds	CCG	TTC	239	-146	chr12	109459919	109459921	+	8534	17.4358	17.7097	12.8226	43.2334	19.8806	18.6195	81.7335	47.9681	3	3	FALSE	0	FALSE	FALSE
ENSMUST00000109844	ENSMUSG00000040856	Dlk1	protein_coding	1357	cds	ATC	NA	384	-1	chr12	109460354	109460356	+	8547	17.3262	17.5199	30.615	31.7592	26.914	29.2293	87.9025	65.4611	3	3	TRUE	0	FALSE	FALSE
ENSMUST00000109842	ENSMUSG00000040856	Dlk1	protein_coding	739	cds	GGG	GGT	190	-122	chr12	109459772	109459774	+	8528	22.8636	17.48	24.3683	24.4055	20.7465	14.6272	59.7792	64.712	3	3	FALSE	0	FALSE	FALSE
ENSMUST00000109842	ENSMUSG00000040856	Dlk1	protein_coding	1102	cds	ATC	NA	311	-1	chr12	109460354	109460356	+	8547	22.4882	17.48	29.4951	32.4358	29.0484	29.6603	91.1445	69.4634	3	3	TRUE	0	FALSE	FALSE
ENSMUST00000109843	ENSMUSG00000040856	Dlk1	protein_coding	238	cds	GCT	GAA	23	-267	chr12	109454986	109454988	+	8524	14.637	28.4272	10.5646	36.8785	20.1525	14.7196	71.7506	53.6288	3	3	FALSE	0	FALSE	FALSE
ENSMUST00000109843	ENSMUSG00000040856	Dlk1	protein_coding	739	cds	GGG	GGT	190	-100	chr12	109459772	109459774	+	8528	22.2808	20.0852	24.8891	22.5144	23.8189	17.2222	63.5555	67.2551	3	3	FALSE	0	FALSE	FALSE
ENSMUST00000109843	ENSMUSG00000040856	Dlk1	protein_coding	1036	cds	ATC	NA	289	-1	chr12	109460354	109460356	+	8547	19.917	17.7056	30.1056	34.0457	29.8021	28.48	92.3278	67.7282	3	3	TRUE	0	FALSE	FALSE
ENSMUST00000109846	ENSMUSG00000040856	Dlk1	protein_coding	695	cds	GGG	GGT	190	-144	chr12	109459772	109459774	+	8528	21.4299	16.8951	26.8579	21.4953	17.1106	16.5915	55.1974	65.1829	3	3	FALSE	0	FALSE	FALSE
ENSMUST00000109846	ENSMUSG00000040856	Dlk1	protein_coding	1124	cds	ATC	NA	333	-1	chr12	109460354	109460356	+	8547	21.4299	19.9034	31.4524	32.4297	29.0586	31.0571	92.5455	72.7857	3	3	TRUE	0	FALSE	FALSE
ENSMUST00000173539	ENSMUSG00000040856	Dlk1	protein_coding	575	cds	GGG	GGT	190	-120	chr12	109459772	109459774	+	8528	23.1668	19.5687	27.0816	23.3711	17.0804	16.7563	57.2078	69.8172	3	3	FALSE	0	FALSE	FALSE
ENSMUST00000173539	ENSMUSG00000040856	Dlk1	protein_coding	932	cds	ATC	NA	309	-1	chr12	109460354	109460356	+	8547	20.1712	18.4213	31.447	34.7128	27.6976	29.462	91.8725	70.0396	3	3	TRUE	0	FALSE	FALSE
ENSMUST00000109841	ENSMUSG00000040856	Dlk1	protein_coding	69	cds	GCT	GAA	23	-269	chr12	109454986	109454988	+	8524	17.5575	23.7592	10.5293	39.7767	20.5181	17.291	77.5858	51.846	3	3	FALSE	0	FALSE	FALSE
ENSMUST00000109841	ENSMUSG00000040856	Dlk1	protein_coding	570	cds	GGG	GGT	190	-102	chr12	109459772	109459774	+	8528	23.4561	19.4591	27.3093	29.9142	23.8754	15.4498	69.2394	70.2245	3	3	FALSE	0	FALSE	FALSE
ENSMUST00000072503	ENSMUSG00000059070	Rpl18	protein_coding	66	cds	ATG	GGT	0	-188	chr7	45718136	45718138	+	29660	34.9996	22.7341	23.6566	31.8913	26.5932	21.0406	79.5252	81.3903	3	3	TRUE	0	FALSE	TRUE
ENSMUST00000140251	ENSMUSG00000022010	Tsc22d1	protein_coding	408	cds	GCA	NA	85	-1	chr14	76506668	76506670	+	11298	58.8974	94.2832	41.3119	52.3538	20.6595	32.3731	105.386	194.493	3	3	TRUE	0	FALSE	FALSE
ENSMUST00000142683	ENSMUSG00000022010	Tsc22d1	protein_coding	467	cds	GCA	NA	85	-1	chr14	76506668	76506670	+	11298	54.6908	104.955	42.8238	50.5876	14.9784	27.8394	93.4055	202.47	3	3	TRUE	0	FALSE	FALSE
ENSMUST00000101618	ENSMUSG00000022010	Tsc22d1	protein_coding	541	cds	GCA	NA	106	-1	chr14	76506668	76506670	+	11298	58.8667	92.6877	47.1118	52.4657	17.5435	32.1947	102.204	198.666	3	3	TRUE	0	FALSE	FALSE
ENSMUST00000177207	ENSMUSG00000022010	Tsc22d1	protein_coding	381	cds	GCA	NA	85	-1	chr14	76506668	76506670	+	11298	60.4869	95.6035	45.624	49.8248	20.1797	34.9309	104.935	201.714	3	3	TRUE	0	FALSE	FALSE
ENSMUST00000022587	ENSMUSG00000022010	Tsc22d1	protein_coding	251	cds	TGG	TGT	4	-139	chr14	76504728	76504730	+	11290	18.6549	40.8821	16.0304	23.667	11.7757	12.6635	48.1062	75.5674	3	3	TRUE	0	FALSE	FALSE
ENSMUST00000022587	ENSMUSG00000022010	Tsc22d1	protein_coding	254	cds	TGT	AGA	5	-138	chr14	76504731	76504733	+	11291	14.8863	19.3821	24.9499	13.4734	10.7955	11.9472	36.2162	59.2184	3	3	FALSE	0	FALSE	FALSE
ENSMUST00000022587	ENSMUSG00000022010	Tsc22d1	protein_coding	665	cds	GCA	NA	142	-1	chr14	76506668	76506670	+	11298	55.1459	96.9191	42.035	51.7862	15.6525	34.1437	101.582	194.1	3	3	TRUE	0	FALSE	FALSE
ENSMUST00000134109	ENSMUSG00000022010	Tsc22d1	protein_coding	199	cds	TGG	TGT	4	-78	chr14	76504728	76504730	+	11290	18.6549	40.8821	16.0304	23.667	14.1857	12.6635	50.5162	75.5674	3	3	TRUE	0	FALSE	FALSE
ENSMUST00000134109	ENSMUSG00000022010	Tsc22d1	protein_coding	202	cds	TGT	AGA	5	-77	chr14	76504731	76504733	+	11291	14.8863	19.3821	24.9499	13.4734	10.7955	11.9472	36.2162	59.2184	3	3	FALSE	0	FALSE	FALSE
ENSMUST00000133224	ENSMUSG00000022010	Tsc22d1	protein_coding	452	cds	GCA	NA	85	-1	chr14	76506668	76506670	+	11298	56.8247	97.0883	40.4629	49.2026	17.2975	28.7858	95.2859	194.376	3	3	TRUE	0	FALSE	FALSE
ENSMUST00000112866	ENSMUSG00000061353	Cxcl12	protein_coding	121	cds	ATG	GAC	0	-89	chr6	117168655	117168657	+	28149	28.6831	57.6676	14.8235	22.3483	10.4263	13.2057	45.9803	101.174	3	3	TRUE	0	FALSE	FALSE
ENSMUST00000112871	ENSMUSG00000061353	Cxcl12	protein_coding	82	cds	ATG	GAC	0	-93	chr6	117168655	117168657	+	28149	31.1632	61.2184	16.3812	24.0438	10.8764	14.3213	49.2416	108.763	3	3	TRUE	0	FALSE	FALSE
ENSMUST00000073043	ENSMUSG00000061353	Cxcl12	protein_coding	79	cds	ATG	GAC	0	-119	chr6	117168655	117168657	+	28149	36.9057	70.8354	19.8036	28.107	13.0675	17.2783	58.4528	127.545	3	3	TRUE	0	FALSE	FALSE
ENSMUST00000029846	ENSMUSG00000028195	Ccn1	protein_coding	189	cds	ATG	AGC	0	-379	chr3	145649797	145649795	-	22488	246.005	207.465	237.861	185.287	77.8755	135.222	398.385	691.33	3	3	TRUE	0	FALSE	TRUE
ENSMUST00000029846	ENSMUSG00000028195	Ccn1	protein_coding	705	cds	GAC	GAC	172	-207	chr3	145648643	145648641	-	22478	27.5311	45.5014	23.6653	41.6497	22.6387	35.3627	99.6512	96.6977	3	3	FALSE	0	FALSE	TRUE
ENSMUST00000029846	ENSMUSG00000028195	Ccn1	protein_coding	1017	cds	AGC	CTA	276	-103	chr3	145648210	145648208	-	22467	12.7014	17.4388	17.1963	20.2355	15.2106	18.379	53.8251	47.3366	3	3	FALSE	0	FALSE	TRUE
ENSMUST00000029846	ENSMUSG00000028195	Ccn1	protein_coding	1323	cds	GAC	NA	378	-1	chr3	145647676	145647674	-	22455	29.8459	61.52	32.2101	69.7935	36.8719	42.747	149.412	123.576	3	3	TRUE	0	FALSE	TRUE
ENSMUST00000033283	ENSMUSG00000030978	Rrm1	protein_coding	330	cds	ATG	CAT	0	-792	chr7	102442024	102442026	+	30211	24.4596	28.9413	20.5286	36.8263	14.8184	23.047	74.6916	73.9295	3	3	TRUE	0	FALSE	TRUE
ENSMUST00000033283	ENSMUSG00000030978	Rrm1	protein_coding	2055	cds	ACA	GAC	575	-217	chr7	102461639	102461641	+	30226	10.6434	11.7814	15.3508	20.1222	18.3358	24.2945	62.7524	37.7756	3	3	FALSE	0	FALSE	TRUE
ENSMUST00000114193	ENSMUSG00000022890	Atp5j	protein_coding	261	cds	ATG	GTT	0	-108	chr16	84831493	84831491	-	14009	60.3767	70.4137	62.0581	45.7844	46.1404	58.286	150.211	192.848	3	3	TRUE	0	FALSE	FALSE
ENSMUST00000114193	ENSMUSG00000022890	Atp5j	protein_coding	546	cds	GAT	GAT	95	-13	chr16	84828429	84828427	-	14005	13.4107	12.404	14.4533	11.6988	11.0823	19.4134	42.1945	40.2679	3	3	FALSE	0	FALSE	FALSE
ENSMUST00000114191	ENSMUSG00000022890	Atp5j	protein_coding	328	cds	ATG	GTT	0	-108	chr16	84831493	84831491	-	14009	60.3767	70.4137	62.0581	45.7844	46.1404	58.286	150.211	192.848	3	3	TRUE	0	FALSE	FALSE
ENSMUST00000114191	ENSMUSG00000022890	Atp5j	protein_coding	613	cds	GAT	GAT	95	-13	chr16	84828429	84828427	-	14005	13.4107	12.404	14.4533	11.6988	11.0823	19.4134	42.1945	40.2679	3	3	FALSE	0	FALSE	FALSE
[truncated: 7,009 more rows]

## Sheet: Pelo MEFs
ensembl_transcript_id	ensembl_gene_id	external_gene_name	transcript_biotype	coordinate	region	P_codon	A_codon	relative_start	relative_end	chrom	spliced_start	spliced_end	strand	genome_index	Cre_control_fibro_Pelo_batch_1	Cre_control_fibro_Pelo_batch_2	Cre_control_fibro_Pelo_batch_3	Pelo_fibro_1	Pelo_fibro_2	Pelo_fibro_3	Pelo_pause_sum	Control_pause_sum	Pelo_pause_count	Control_pause_count	other_transcript_start_stop	pause_difference	unique_NMD_locus	unique_genome_indicies
[truncated: 20,326 more rows]
