# Supplementary material for: Defects in translation-dependent quality control pathways lead to convergent molecular and neurodevelopmental pathology
Source: eLife. 2021 Apr 26;10:e66904. doi: 10.7554/eLife.66904 (PMC8075583; doi:10.7554/eLife.66904)
Supplement: Supplementary file 6. [file elife-66904-supp6.xlsx]

## Sheet: TE_Hbs1l
gene_id	external_gene_name	baseMean	log2FoldChange	lfcSE	stat	pvalue	padj	log2_Cre_control_fibro_Hbs1l_batch_1_TE	log2_Cre_control_fibro_Hbs1l_batch_2_TE	log2_Cre_control_fibro_Hbs1l_batch_3_TE	log2_Hbs1l_fibro_1_TE	log2_Hbs1l_fibro_2_TE	log2_Hbs1l_fibro_3_TE
ENSMUSG00000025316.16	Banp	697.005	-0.964728	0.142706	6.76024	1.37765e-11	1.18877e-07	0.517396	0.783577	0.730768	-0.273493	-0.309161	-0.352791
ENSMUSG00000043716.13	Rpl7	8286.5	0.971508	0.167917	-5.78566	7.22284e-09	3.11629e-05	-3.12656	-3.20456	-3.11156	-2.06026	-2.09786	-2.38778
ENSMUSG00000058006.12	Mdn1	2465.37	1.13972	0.209164	-5.44893	5.06724e-08	0.000145751	2.0732	1.41462	1.85022	2.94744	2.59269	3.07792
ENSMUSG00000026605.14	Cenpf	1061.99	0.891863	0.169599	-5.25866	1.45105e-07	0.000313028	2.59193	2.12693	2.43562	3.57934	2.94711	3.28795
ENSMUSG00000028541.14	B4galt2	603.366	-1.55198	0.302829	5.12494	2.97626e-07	0.000513643	-3.77793	-3.85659	-4.72606	-5.60294	-5.6275	-5.69087
ENSMUSG00000026034.17	Clk1	455.356	1.11817	0.229797	-4.86592	1.13926e-06	0.00163845	1.23976	0.998064	1.28637	2.82607	2.11243	2.10113
ENSMUSG00000038059.7	Smim3	454.357	-0.73264	0.15366	4.76794	1.86123e-06	0.00205179	-1.11039	-1.31011	-1.10264	-1.92891	-2.12855	-1.79399
ENSMUSG00000031229.16	Atrx	1778.76	1.00402	0.210771	-4.76354	1.90223e-06	0.00205179	2.18249	1.59743	2.16	3.361	2.5121	3.06767
ENSMUSG00000038170.15	Pde4dip	1531.75	0.631692	0.135166	-4.67344	2.962e-06	0.0028399	0.526917	0.454001	0.613049	0.97592	1.12388	1.3514
ENSMUSG00000053560.5	Ier2	1110.44	-0.732537	0.157523	4.65034	3.3139e-06	0.00285957	-0.336969	-0.451017	-0.115708	-0.887084	-1.095	-1.20317
ENSMUSG00000059208.15	Hnrnpm	5273.28	0.651944	0.141593	-4.60436	4.13732e-06	0.00297508	0.623966	0.312697	0.349714	1.3213	0.960126	0.932753
ENSMUSG00000060636.14	Rpl35a	2688.38	0.930937	0.202005	-4.60849	4.0561e-06	0.00297508	-5.21151	-5.27721	-5.10146	-4.36015	-4.11337	-4.31251
ENSMUSG00000071415.6	Rpl23	5674.8	0.919996	0.205513	-4.47658	7.58479e-06	0.00363607	-1.70283	-2.09272	-1.78175	-0.819549	-0.917099	-1.06269
ENSMUSG00000024991.8	Eif3a	10051.3	0.74747	0.166247	-4.49615	6.91963e-06	0.00363607	1.19561	0.694574	0.915602	1.89692	1.38162	1.7074
ENSMUSG00000093930.2	Hmgcs1	3270.71	0.986423	0.220299	-4.47766	7.54648e-06	0.00363607	2.09754	1.15629	1.90964	2.92405	2.46615	2.71325
ENSMUSG00000061983.7	Rps12	4977.66	0.971892	0.213838	-4.54499	5.49371e-06	0.00363607	-6.89825	-6.7821	-6.54294	-5.89867	-5.65964	-5.7258
ENSMUSG00000041870.16	Ankrd13a	1894.98	-0.534187	0.118256	4.5172	6.26619e-06	0.00363607	-1.35422	-1.35833	-1.33411	-1.98005	-1.83891	-1.87443
ENSMUSG00000024213.14	Nudt3	825.447	-1.00978	0.224809	4.49175	7.06415e-06	0.00363607	-4.10235	-3.70306	-3.94004	-4.68254	-5.74328	-4.91894
ENSMUSG00000029447.11	Cct6a	9540.84	0.77987	0.175619	-4.44069	8.96716e-06	0.00386888	0.400226	0.343086	0.407425	1.47748	0.927956	1.10839
ENSMUSG00000021715.12	Cwc27	265.642	0.870835	0.196043	-4.44206	8.91001e-06	0.00386888	0.818463	0.614985	0.882472	2.01466	1.38189	1.52189
ENSMUSG00000020091.15	Eif4ebp2	2003.93	-0.684706	0.155382	4.4066	1.05005e-05	0.00431472	-3.42433	-3.67843	-3.48034	-4.28358	-4.1775	-4.24183
ENSMUSG00000066406.16	Akap13	1737.96	0.807539	0.188249	-4.28975	1.78877e-05	0.0052899	1.21425	0.461259	0.848802	1.64925	1.46684	1.71235
ENSMUSG00000020307.15	Cdc34	2681.21	-0.743343	0.173685	4.27983	1.87037e-05	0.0052899	-2.82176	-2.39624	-2.75377	-3.29254	-3.43594	-3.5327
ENSMUSG00000027014.14	Cwc22	361.209	0.860212	0.199143	-4.31956	1.56337e-05	0.0052899	-0.236136	-0.505569	-0.103868	0.809723	0.412103	0.550926
ENSMUSG00000037544.14	Dlgap5	1086.53	0.589349	0.137818	-4.27628	1.90042e-05	0.0052899	0.827289	0.764582	0.883556	1.58291	1.18746	1.43614
ENSMUSG00000040479.12	Dgkz	1104.17	-0.805729	0.186547	4.31918	1.56608e-05	0.0052899	-2.40414	-2.16281	-2.40729	-2.99753	-2.85624	-3.60543
ENSMUSG00000024073.16	Birc6	6090.21	0.932262	0.217519	-4.2859	1.82005e-05	0.0052899	2.56474	1.81992	2.42717	3.44488	2.87155	3.18748
ENSMUSG00000037742.14	Eef1a1	108633	0.467482	0.10841	-4.31217	1.61664e-05	0.0052899	-2.73835	-2.77845	-2.86883	-2.34227	-2.23921	-2.45545
ENSMUSG00000022769.9	Sdf2l1	628.7	-0.586638	0.136753	4.28978	1.78851e-05	0.0052899	0.562048	0.637144	0.518768	-0.148338	0.149452	-0.0462205
ENSMUSG00000019971.10	Cep290	269.22	0.908231	0.211499	-4.29426	1.75279e-05	0.0052899	2.31124	1.87118	2.29399	3.07952	2.81682	3.38348
ENSMUSG00000024063.13	Lbh	3004.93	-0.496441	0.114411	4.33909	1.43071e-05	0.0052899	-1.43944	-1.50496	-1.40134	-1.9236	-1.94643	-1.99258
ENSMUSG00000019977.16	Hbs1l	583.247	-1.00915	0.240487	4.19629	2.71324e-05	0.00731641	-1.1607	-1.07883	-1.33737	-1.70571	-2.51854	-2.70767
ENSMUSG00000060739.8	Nsa2	1283.32	0.94261	0.226201	-4.16714	3.08451e-05	0.0078283	-3.6772	-3.80124	-3.99932	-2.73637	-3.01274	-2.90767
ENSMUSG00000068114.7	Ccdc134	309.752	-0.703665	0.168651	4.17232	3.01518e-05	0.0078283	-0.552763	-0.606652	-0.222627	-1.24839	-1.13635	-1.1203
ENSMUSG00000028195.4	Ccn1	27318.7	-0.478174	0.115375	4.14451	3.40547e-05	0.00833805	1.39339	1.23059	1.55375	0.907744	0.781519	1.00503
ENSMUSG00000011179.8	Odc1	4864.53	-0.63489	0.153369	4.13963	3.47862e-05	0.00833805	-4.1164	-3.95305	-4.276	-4.6598	-4.77362	-4.87581
ENSMUSG00000053094.15	Tmem248	1182.92	-0.500969	0.121383	4.12719	3.67228e-05	0.00849454	-0.449238	-0.552153	-0.563451	-1.037	-1.11077	-1.01151
ENSMUSG00000018559.16	Ctdnep1	1476.37	-0.597062	0.144815	4.12293	3.74079e-05	0.00849454	-2.30649	-2.36173	-2.43099	-2.99038	-2.77811	-3.14878
ENSMUSG00000039275.9	Foxk2	1802.22	-0.452924	0.110529	4.09778	4.17122e-05	0.00906005	-0.949848	-1.23074	-1.04735	-1.63145	-1.4823	-1.50953
ENSMUSG00000062661.6	Ncs1	2384.29	-0.565064	0.137948	4.0962	4.19982e-05	0.00906005	-2.02929	-1.84085	-1.87869	-2.47373	-2.43908	-2.59042
ENSMUSG00000020814.13	Mxra7	1611.68	-0.576251	0.140926	4.08903	4.3318e-05	0.00911685	-0.94801	-0.958635	-1.28157	-1.55726	-1.70838	-1.71124
ENSMUSG00000006005.18	Tpr	5438.05	0.904997	0.222773	-4.06242	4.85676e-05	0.00963463	1.97768	1.33388	1.89347	3.08673	2.23626	2.58851
ENSMUSG00000014303.13	Glis2	778.085	-0.673248	0.165835	4.05974	4.91278e-05	0.00963463	-1.406	-1.58256	-1.72742	-2.2583	-2.25143	-2.30399
ENSMUSG00000025647.16	Shisa5	3426.68	-0.538574	0.132507	4.06448	4.81395e-05	0.00963463	0.0874795	-0.0786404	-0.150106	-0.63837	-0.77351	-0.405845
ENSMUSG00000038664.16	Herc1	1111.46	0.741873	0.183258	-4.04823	5.16059e-05	0.00968059	1.62348	1.16072	1.55464	2.4503	1.8424	2.23881
ENSMUSG00000022672.8	Prkdc	458.147	1.12374	0.277573	-4.04846	5.15549e-05	0.00968059	2.4925	1.68218	2.21182	3.86182	2.81289	3.16375
ENSMUSG00000038991.17	Txndc5	9241.82	-0.391383	0.0968301	4.04196	5.30074e-05	0.00973193	-0.0602809	-0.062973	-0.0663742	-0.56609	-0.372774	-0.459823
ENSMUSG00000035284.10	Vps13c	924.321	0.97521	0.241884	-4.03172	5.53691e-05	0.00995374	1.97456	1.34136	1.86846	3.1897	2.27558	2.62932
ENSMUSG00000011877.13	Git1	1642.85	-0.574184	0.143211	4.00937	6.08802e-05	0.0107211	-1.65318	-1.57984	-1.7211	-2.19475	-2.03954	-2.46504
ENSMUSG00000022365.6	Derl1	1781.87	-0.498142	0.124628	3.99705	6.41381e-05	0.0110689	-1.01955	-1.15224	-1.08079	-1.64878	-1.5934	-1.56686
ENSMUSG00000026278.14	Bok	577.323	-0.858101	0.214948	3.99213	6.54816e-05	0.0110792	-2.55281	-2.34897	-2.27617	-3.49121	-2.84586	-3.3649
ENSMUSG00000005417.17	Mprip	8317.95	-0.463595	0.116647	3.97434	7.0574e-05	0.0117112	-2.25382	-2.12997	-2.2523	-2.72631	-2.54077	-2.78441
ENSMUSG00000096054.3	Syne1	803.469	0.861728	0.217561	-3.96086	7.46802e-05	0.0119336	2.25925	1.44852	1.95472	2.72858	2.57235	2.82769
ENSMUSG00000007891.16	Ctsd	8957.68	-0.458957	0.115867	3.96106	7.46186e-05	0.0119336	0.0185602	0.112053	0.132587	-0.55568	-0.306406	-0.28135
ENSMUSG00000019189.13	Rnf145	979.604	-0.564466	0.143325	3.93837	8.20358e-05	0.0128707	-0.162869	-0.0646673	0.045122	-0.896252	-0.422595	-0.564284
ENSMUSG00000039967.14	Zfp292	528.398	0.871269	0.222276	-3.91975	8.86391e-05	0.0136583	2.72831	1.86715	2.69337	3.3566	3.04473	3.43844
ENSMUSG00000020680.15	Taf15	1660.25	0.702694	0.179492	-3.91489	9.04443e-05	0.013692	1.15679	0.456021	0.763837	1.37722	1.34501	1.6714
ENSMUSG00000025290.17	Rps24	8982.74	0.820509	0.210113	-3.90509	9.41909e-05	0.0140133	-3.96057	-3.76675	-3.69954	-2.67767	-3.27842	-3.00693
ENSMUSG00000024795.11	Kif20b	809.831	1.01584	0.260825	-3.89474	9.8306e-05	0.0143438	1.90368	1.49207	2.18978	3.58409	2.48283	2.75964
ENSMUSG00000056214.9	Pard6g	549.835	-0.639164	0.164258	3.89123	9.97369e-05	0.0143438	-0.473426	-0.562001	-0.572649	-1.0194	-1.22817	-1.29292
ENSMUSG00000068758.8	Il3ra	314.736	-0.796173	0.205241	3.8792	0.0001048	0.0145858	-0.754189	-0.912599	-0.851802	-1.53569	-1.60682	-1.83766
ENSMUSG00000020982.9	Nemf	1043.39	0.771236	0.198791	-3.87964	0.000104611	0.0145858	1.24544	0.869954	1.19366	2.2117	1.61513	1.79795
ENSMUSG00000066607.5	Insyn1	288.281	-1.68751	0.436902	3.86244	0.000112259	0.0146361	-3.8565	-4.92854	-3.98694	-5.84901	-6.15135	-6.0235
ENSMUSG00000034243.17	Golgb1	1706.16	0.738276	0.190945	-3.86643	0.000110442	0.0146361	1.75064	0.997909	1.38684	2.1677	1.84224	2.24596
ENSMUSG00000032458.6	Copb2	9752.9	0.321571	0.0833203	-3.85945	0.000113642	0.0146361	0.202186	0.16678	0.299366	0.547426	0.489317	0.556394
ENSMUSG00000026475.7	Rgs16	1971.44	-0.467548	0.120677	3.87438	0.000106896	0.0146361	0.188424	0.296228	0.333973	-0.19634	-0.351688	-0.11396
ENSMUSG00000052310.9	Slc39a1	2371.44	-0.474567	0.122905	3.86126	0.000112805	0.0146361	-1.74276	-1.74366	-1.91639	-2.38893	-2.24584	-2.2145
ENSMUSG00000022974.12	Paxbp1	259.434	0.824344	0.215132	-3.83181	0.000127206	0.0155244	0.981516	0.882071	1.26997	2.34974	1.48397	1.85368
ENSMUSG00000032353.9	Tmed3	1796.75	-0.473454	0.12356	3.83178	0.000127222	0.0155244	0.0527796	0.261685	0.110531	-0.449849	-0.289418	-0.311341
ENSMUSG00000048612.16	Myof	8752.59	0.69402	0.180908	-3.83632	0.00012489	0.0155244	1.07318	0.386496	0.546299	1.39813	1.15565	1.42122
ENSMUSG00000029250.5	Polr2b	1972.41	0.53016	0.138395	-3.83078	0.000127736	0.0155244	0.793769	0.311137	0.633946	1.21929	0.957265	1.1074
ENSMUSG00000029814.10	Igf2bp3	1540.68	0.541387	0.141473	-3.82677	0.000129834	0.0155603	1.00423	0.858374	0.819897	1.53632	1.29239	1.45999
ENSMUSG00000032264.9	Zw10	1095.63	0.406224	0.106809	-3.80326	0.000142802	0.0166614	0.812674	0.76547	0.852482	1.20067	1.21296	1.19351
ENSMUSG00000038482.11	Tfdp1	1364.46	-0.607443	0.159722	3.80312	0.000142883	0.0166614	-2.86691	-2.9202	-2.9541	-3.28793	-3.50577	-3.86175
ENSMUSG00000025261.18	Huwe1	5702.12	0.780412	0.205448	-3.79859	0.000145524	0.016743	1.48481	0.679865	1.03707	1.91577	1.54442	1.94816
ENSMUSG00000026234.12	Ncl	19105.4	0.745285	0.196767	-3.78766	0.000152072	0.0170516	0.483842	0.179358	0.44231	1.54344	0.833443	0.987554
ENSMUSG00000004535.12	Tax1bp1	3121.12	0.758819	0.200517	-3.78431	0.000154135	0.0170516	1.197	1.08072	1.42027	2.48791	1.71002	1.84007
ENSMUSG00000042699.11	Dhx9	5896.12	0.67639	0.178704	-3.78497	0.000153728	0.0170516	1.60669	0.983292	1.32274	2.13388	1.67827	2.0592
ENSMUSG00000045624.15	Esf1	962.097	0.786103	0.208021	-3.77895	0.000157489	0.0171511	1.2978	0.931384	1.24991	2.39187	1.57779	1.90391
ENSMUSG00000057147.13	Dph6	294.057	0.618566	0.163925	-3.77346	0.000160996	0.0171511	0.334175	0.0910163	0.128216	0.94445	0.741673	0.697818
ENSMUSG00000066900.11	Suds3	1465.15	-0.599573	0.158833	3.77486	0.000160095	0.0171511	-2.52909	-2.5194	-2.60266	-3.19774	-3.03845	-3.2486
ENSMUSG00000074182.8	Znhit6	733.64	0.492165	0.130636	-3.76745	0.000164926	0.0173056	0.261539	0.110995	0.191241	0.744575	0.640774	0.617418
ENSMUSG00000004356.8	Utp20	3698.42	0.65773	0.17469	-3.76514	0.000166457	0.0173056	1.57774	0.824318	1.24982	1.96695	1.65928	1.91031
ENSMUSG00000028152.10	Tspan5	689.44	-0.65247	0.17357	3.75912	0.000170512	0.017516	-0.700398	-1.0668	-0.35263	-1.46532	-1.26367	-1.34235
ENSMUSG00000032470.17	Mras	776.558	-0.640798	0.170928	3.74894	0.000177586	0.0176149	-1.8904	-1.83999	-1.99424	-2.69802	-2.45801	-2.54732
ENSMUSG00000034254.17	Agpat1	2070.66	-0.616927	0.164687	3.74605	0.000179639	0.0176149	-2.3087	-2.1888	-2.46642	-2.87755	-2.72521	-3.23473
ENSMUSG00000020484.19	Xbp1	2335.03	-0.430084	0.114624	3.75212	0.000175346	0.0176149	-0.539126	-0.648778	-0.473069	-1.06624	-0.827164	-1.08265
ENSMUSG00000001729.14	Akt1	8306.45	-0.453725	0.121045	3.74841	0.000177959	0.0176149	-2.40917	-2.3257	-2.45004	-2.97752	-2.71342	-2.8911
ENSMUSG00000032485.14	Scap	1188.71	-0.486628	0.13005	3.74186	0.000182665	0.0177103	-1.38376	-1.45242	-1.56366	-1.99093	-1.80837	-2.06747
ENSMUSG00000035051.15	Dhx57	501.3	0.658093	0.176427	-3.73012	0.000191389	0.01835	0.999561	0.666983	0.699462	1.43704	1.08995	1.70475
ENSMUSG00000034781.5	Gna11	2759.49	-0.503388	0.135071	3.72684	0.000193898	0.0183863	-1.3876	-1.31031	-1.50165	-1.97268	-1.85554	-1.93005
ENSMUSG00000022337.7	Emc2	633.409	0.912384	0.245287	-3.71965	0.000199498	0.018397	0.811766	0.536275	0.953702	2.19838	1.41271	1.53229
ENSMUSG00000019773.7	Fbxo5	340.722	0.647389	0.174099	-3.7185	0.000200408	0.018397	0.974207	0.850499	0.9318	1.63777	1.41905	1.64859
ENSMUSG00000058600.13	Rpl30	3103.83	0.661974	0.177765	-3.72388	0.000196184	0.018397	-3.69407	-3.42339	-3.61961	-2.56812	-2.99906	-3.19493
ENSMUSG00000050965.14	Prkca	817.901	0.63635	0.171802	-3.70397	0.000212249	0.0186887	0.711976	0.110744	0.46705	1.29314	0.896085	0.912493
ENSMUSG00000018293.4	Pfn1	28538.7	-0.476671	0.128552	3.70799	0.000208908	0.0186887	-0.105724	-0.0934504	-0.0059504	-0.516582	-0.514481	-0.641253
ENSMUSG00000021134.17	Srsf5	1197.11	0.664483	0.179142	-3.70924	0.000207879	0.0186887	-0.848019	-1.19359	-0.830645	-0.0678052	-0.510649	-0.363922
ENSMUSG00000028556.15	Dock7	2755.32	0.634984	0.171336	-3.70607	0.000210496	0.0186887	1.69907	1.03171	1.32405	2.0806	1.75313	2.04373
ENSMUSG00000042487.6	Leo1	810.388	0.559558	0.151438	-3.69496	0.00021992	0.0191685	0.374415	0.568586	0.214656	1.08388	0.658817	1.0225
ENSMUSG00000027810.14	Eif2a	1611.86	0.603067	0.163679	-3.68445	0.000229193	0.0197771	0.92588	0.75132	0.997259	1.79691	1.37709	1.33271
ENSMUSG00000026987.16	Baz2b	405.704	0.761014	0.207206	-3.67274	0.000239962	0.0201033	1.51445	0.931502	0.939392	1.97147	1.62537	2.0069
ENSMUSG00000063273.11	Naa15	3308.62	0.735292	0.20011	-3.67443	0.000238378	0.0201033	1.48778	1.01543	1.66371	2.48869	1.77295	2.12854
ENSMUSG00000004895.9	Prcc	1006.21	-0.513863	0.139785	3.6761	0.000236825	0.0201033	-0.582013	-0.419126	-0.460395	-1.01889	-0.95611	-1.09354
ENSMUSG00000032301.13	Psma4	2003.98	0.633146	0.172713	-3.66588	0.000246492	0.020257	-0.654174	-0.598409	-0.535224	0.288176	-0.0880126	-0.0810738
ENSMUSG00000031592.10	Pcm1	1551.47	0.84688	0.230875	-3.66812	0.000244337	0.020257	2.25039	1.68009	2.3321	3.45635	2.50506	2.91148
ENSMUSG00000015605.6	Srf	1736.01	-0.528563	0.144305	3.66281	0.000249463	0.0203077	-1.37343	-1.32185	-1.22053	-1.78213	-1.62238	-2.12708
ENSMUSG00000022791.19	Tnk2	3715.87	-0.485353	0.132771	3.65557	0.000256614	0.0206946	-1.60169	-1.56923	-1.68716	-2.22467	-1.99197	-2.11418
ENSMUSG00000023079.14	Gtf2ird1	697.093	-0.534493	0.146335	3.65253	0.000259674	0.0207475	-0.563957	-0.608848	-0.681967	-1.32443	-1.10329	-1.08908
ENSMUSG00000045328.11	Cenpe	1674.67	0.896032	0.245788	-3.64555	0.000266817	0.0209306	2.01174	1.08153	1.75392	2.91943	2.10274	2.48615
ENSMUSG00000031751.14	Amfr	3297.58	-0.501341	0.137447	3.64753	0.000264778	0.0209306	-0.0898647	0.121164	0.0309716	-0.618804	-0.329189	-0.521784
ENSMUSG00000009621.18	Vav2	473.587	-0.626699	0.172035	3.64286	0.000269625	0.0209603	-1.72973	-1.45862	-1.42272	-2.1913	-2.18059	-2.1843
ENSMUSG00000057113.13	Npm1	8510.65	0.73086	0.200818	-3.63942	0.000273252	0.0210526	-2.02224	-2.18333	-2.03879	-0.912991	-1.55309	-1.54143
ENSMUSG00000029234.13	Tmem165	1537.09	-0.389299	0.107397	3.62487	0.000289106	0.0220769	0.884452	1.07168	1.17083	0.694037	0.604057	0.632126
ENSMUSG00000016528.10	Mapkapk2	3538.3	-0.457826	0.126677	3.61411	0.000301387	0.0226145	-1.71836	-1.68684	-1.75806	-2.15637	-2.15683	-2.27744
ENSMUSG00000028487.18	Bnc2	320.846	0.786023	0.217475	-3.61431	0.000301151	0.0226145	1.63126	0.767007	1.46909	2.18722	2.06719	1.93047
ENSMUSG00000019731.13	Slc35e1	1614.44	-0.493807	0.136838	3.6087	0.000307734	0.0228917	-1.30112	-1.44019	-1.55285	-2.08615	-1.86478	-1.87747
ENSMUSG00000035247.16	Hectd1	3853.84	0.79902	0.221919	-3.6005	0.000317607	0.0234242	1.70272	1.1148	1.47446	2.60555	1.92338	2.14178
ENSMUSG00000022272.17	Myo10	2819.27	0.638838	0.177688	-3.59529	0.000324034	0.0236957	1.0724	0.671653	0.825118	1.3378	1.38925	1.70081
ENSMUSG00000079111.3	Kdelr2	8335.17	-0.385842	0.107545	3.58773	0.000333576	0.0241419	1.80494	1.54803	1.81791	1.26437	1.24866	1.4615
ENSMUSG00000028691.12	Prdx1	7683.12	0.630831	0.175913	-3.58604	0.000335732	0.0241419	-0.999103	-0.914717	-0.985894	-0.071301	-0.436486	-0.489453
ENSMUSG00000003226.7	Ranbp2	4072.01	1.00126	0.279407	-3.58353	0.000338985	0.0241744	2.15264	1.5341	2.14454	3.62722	2.49984	2.79672
ENSMUSG00000037475.15	Thoc2	1172.12	0.831245	0.232227	-3.57945	0.000344317	0.0243534	1.68348	1.13119	1.75613	2.78708	2.0286	2.29402
ENSMUSG00000026457.14	Adipor1	2710.92	-0.471166	0.131857	3.57331	0.000352493	0.0246139	-1.60638	-1.54826	-1.45666	-2.17409	-1.99158	-1.91234
ENSMUSG00000024054.14	Smchd1	2039.6	0.966828	0.270637	-3.57241	0.000353706	0.0246139	2.1043	1.24067	1.79473	3.26732	2.20309	2.59649
ENSMUSG00000024120.12	Lrpprc	2637.36	0.597395	0.167734	-3.56157	0.000368639	0.0254479	1.27567	0.918688	1.15586	2.00231	1.53268	1.60692
ENSMUSG00000021366.8	Hivep1	315.518	0.729837	0.205079	-3.55882	0.000372531	0.0255019	-0.036495	-0.281135	0.13301	0.443584	0.614609	0.936378
ENSMUSG00000033557.17	Fam20b	689.989	-0.550563	0.15479	3.55685	0.000375332	0.0255019	-2.06587	-2.16035	-1.97357	-2.73075	-2.84738	-2.3732
ENSMUSG00000029176.13	Anapc4	2497.8	0.590257	0.166426	-3.54667	0.00039014	0.0263009	1.2975	1.09238	1.188	2.08674	1.64051	1.63427
ENSMUSG00000026229.17	Psmd1	5575.92	0.35299	0.0996232	-3.54325	0.000395232	0.0264377	0.662189	0.583547	0.640083	1.10487	0.84735	0.952077
ENSMUSG00000051329.13	Nup160	1630.83	0.68317	0.192941	-3.54082	0.000398882	0.0264766	1.60379	1.17673	1.545	2.51954	1.8684	1.99608
ENSMUSG00000027714.11	Exosc9	920.153	0.753972	0.213134	-3.53756	0.000403849	0.0266016	1.08203	1.00444	1.13455	2.26255	1.67469	1.63344
ENSMUSG00000034271.16	Jdp2	808.546	-0.586342	0.166088	3.53031	0.000415077	0.0270354	-1.5518	-1.58971	-1.42323	-2.17643	-2.09313	-2.10545
ENSMUSG00000026516.8	Nvl	1013.3	0.521872	0.148201	-3.52139	0.000429298	0.0270354	0.645014	0.346093	0.672022	1.26369	0.864592	1.09106
ENSMUSG00000017386.10	Traf4	2236.73	-0.559223	0.158876	3.51987	0.000431759	0.0270354	-1.67634	-1.62115	-1.81659	-2.34451	-2.21304	-2.27234
ENSMUSG00000054453.11	Sytl5	217.585	0.80859	0.229939	-3.51655	0.000437201	0.0270354	2.75776	2.68836	2.97642	3.96954	3.49329	3.63328
ENSMUSG00000028603.15	Scp2	546.09	0.545674	0.155251	-3.5148	0.000440093	0.0270354	-1.51089	-1.42825	-1.6677	-0.85597	-1.17629	-1.0576
ENSMUSG00000021610.8	Clptm1l	2739.51	-0.347586	0.0986471	3.52353	0.000425833	0.0270354	-1.12665	-1.05611	-1.06312	-1.47994	-1.39513	-1.44668
ENSMUSG00000025019.17	Lcor	320.346	0.727666	0.2072	-3.51191	0.000444898	0.0270354	1.28905	0.806426	1.48363	1.97543	1.65386	2.08127
ENSMUSG00000033577.18	Myo6	367.856	0.658275	0.187355	-3.51352	0.000442217	0.0270354	1.06189	0.852331	0.953741	1.97716	1.34711	1.53889
ENSMUSG00000022000.11	Zc3h13	891.692	0.751354	0.213919	-3.51234	0.000444185	0.0270354	0.747723	0.0859576	0.0584428	0.810026	0.923499	1.28185
ENSMUSG00000052298.12	Cdc42se2	659.461	-0.529297	0.150451	3.51807	0.000434699	0.0270354	-1.92047	-1.80398	-1.72034	-2.33988	-2.30416	-2.39672
ENSMUSG00000022283.15	Pabpc1	19574.5	0.325554	0.0925847	-3.51628	0.000437643	0.0270354	-3.01664	-3.08134	-3.00645	-2.63137	-2.73095	-2.80679
ENSMUSG00000037373.12	Ctbp1	3309.74	-0.494766	0.141085	3.50687	0.000453405	0.0273543	-1.6358	-1.72467	-1.71275	-2.33337	-2.11542	-2.14137
ENSMUSG00000074886.11	Grk6	1615.63	-0.487987	0.139223	3.50507	0.000456486	0.0273543	-2.11064	-2.10147	-2.28181	-2.75069	-2.51196	-2.7137
ENSMUSG00000007850.16	Hnrnph1	5316.9	0.735186	0.210236	-3.49695	0.000470603	0.0280057	1.21781	0.833553	1.16207	2.32118	1.61386	1.54857
ENSMUSG00000026377.12	Nifk	1311.3	0.593249	0.169947	-3.49079	0.000481602	0.0281787	0.302553	0.116349	0.273461	1.02624	0.724335	0.724818
ENSMUSG00000026223.15	Itm2c	5004.57	-0.505653	0.144893	3.48984	0.000483306	0.0281787	-0.106226	0.270349	0.0860896	-0.466522	-0.378488	-0.462179
ENSMUSG00000027550.14	Lrrcc1	319.752	0.905177	0.259111	-3.49339	0.000476932	0.0281787	1.59608	0.986028	1.81817	3.00176	2.04747	2.23986
ENSMUSG00000008668.15	Rps18	11848.4	0.551755	0.158423	-3.48281	0.000496188	0.028544	-4.00949	-3.84139	-4.28717	-3.45761	-3.40729	-3.66549
ENSMUSG00000020167.14	Tcf3	1600.5	-0.5412	0.155325	3.48432	0.000493396	0.028544	-0.936012	-0.818723	-1.06759	-1.69254	-1.28519	-1.46592
ENSMUSG00000003068.16	Stk11	1218.43	-0.592527	0.170307	3.47918	0.00050295	0.0287414	-2.58209	-2.68003	-2.71991	-3.32993	-3.2827	-3.22523
ENSMUSG00000033943.15	Mga	1139.02	0.855651	0.246284	-3.47425	0.000512288	0.0290824	1.88953	1.32648	1.96123	3.09258	2.11483	2.57736
ENSMUSG00000037876.17	Jmjd1c	924.556	0.813346	0.234284	-3.47162	0.000517325	0.0291765	2.13276	1.46056	2.19717	3.13051	2.27677	2.84496
ENSMUSG00000032212.10	Sltm	969.359	0.610275	0.178342	-3.42194	0.000621752	0.0304363	1.04171	0.500506	0.553835	1.55358	1.12484	1.21238
ENSMUSG00000019960.8	Dusp6	1238.42	-0.517223	0.151325	3.41797	0.000630905	0.0304363	0.749573	0.555452	1.00689	0.415013	0.0451511	0.228491
ENSMUSG00000020864.13	Ankrd40	1087.5	-0.541144	0.157764	3.43008	0.000603405	0.0304363	-1.65016	-1.79944	-1.92576	-2.37725	-2.61676	-2.14148
ENSMUSG00000021270.13	Hsp90aa1	9336.44	0.751681	0.219564	-3.42351	0.000618175	0.0304363	-2.09597	-2.21103	-2.1089	-0.860859	-1.53717	-1.67795
ENSMUSG00000022757.19	Tfg	3455.31	0.328443	0.0952419	-3.44851	0.000563681	0.0304363	1.35898	1.21984	1.3895	1.65146	1.56703	1.69627
ENSMUSG00000047036.8	Zfp445	689.064	0.741567	0.216088	-3.43178	0.000599639	0.0304363	1.62266	1.28889	1.95585	2.76967	2.21963	2.19179
ENSMUSG00000049658.13	Bdp1	436.365	0.775792	0.226373	-3.42705	0.000610178	0.0304363	1.21622	0.56283	1.08436	1.99531	1.28684	1.90536
ENSMUSG00000020423.6	Btg2	1693.6	-0.463263	0.134309	3.44922	0.000562202	0.0304363	-0.351855	-0.322376	-0.519862	-0.771157	-0.884563	-0.935004
ENSMUSG00000029710.15	Ephb4	1368.03	-0.466453	0.136627	3.41407	0.000640009	0.0304363	-0.307917	-0.161682	-0.282836	-0.824751	-0.566062	-0.783926
ENSMUSG00000050310.9	Rictor	1231.9	0.755428	0.220521	-3.42565	0.000613322	0.0304363	1.99073	1.50808	2.03289	2.92373	2.18351	2.677
ENSMUSG00000014867.9	Surf4	10521.1	-0.378152	0.109763	3.44517	0.00057071	0.0304363	-0.443776	-0.431891	-0.38548	-1.00865	-0.671388	-0.757373
ENSMUSG00000032409.15	Atr	553.085	0.961893	0.278925	-3.44857	0.00056357	0.0304363	2.04715	1.45367	2.19843	3.61323	2.53334	2.63292
ENSMUSG00000060671.12	Atp8b2	1643.56	-0.53901	0.157829	3.41515	0.000637469	0.0304363	-1.59515	-1.7855	-1.75299	-2.30783	-2.19098	-2.29352
ENSMUSG00000042744.16	Hectd4	813.396	0.560547	0.162369	-3.45231	0.000555817	0.0304363	0.949226	0.426548	0.578882	1.33292	0.94285	1.28445
ENSMUSG00000035726.8	Supt16	2897.16	0.727445	0.211915	-3.43273	0.000597541	0.0304363	1.58911	1.11118	1.51503	2.60311	1.89175	1.95868
ENSMUSG00000038784.13	Cnot4	630.127	0.583702	0.170637	-3.42072	0.000624562	0.0304363	1.39187	0.856224	1.21543	1.94842	1.46819	1.79273
ENSMUSG00000030521.11	Mphosph10	825.413	0.822372	0.238769	-3.44422	0.000572711	0.0304363	0.878313	0.545626	0.928022	2.20127	1.24048	1.44813
ENSMUSG00000029191.16	Rfc1	950.066	0.656367	0.192333	-3.41267	0.000643307	0.0304363	0.528411	0.0175314	0.332039	1.26153	0.624396	0.939719
ENSMUSG00000021824.13	Ap3m1	581.053	0.74427	0.215273	-3.45732	0.000545567	0.0304363	-0.919383	-1.39857	-1.02149	0.120594	-0.744335	-0.474338
ENSMUSG00000034218.16	Atm	563.601	0.997484	0.289858	-3.44129	0.000578956	0.0304363	2.07324	1.47758	2.13662	3.57	2.51145	2.78407
ENSMUSG00000022325.14	Pop1	1662.3	0.337489	0.0985005	-3.42627	0.000611942	0.0304363	0.821462	0.791326	0.780085	1.14629	1.06854	1.14773
ENSMUSG00000026356.15	Dars	2647.98	0.67298	0.196775	-3.42006	0.000626078	0.0304363	1.10274	0.98992	1.16873	2.21196	1.44396	1.67965
ENSMUSG00000039844.20	Rapgef1	2831.07	-0.48226	0.140855	3.4238	0.000617532	0.0304363	-2.34669	-2.34503	-2.31015	-2.85564	-2.9678	-2.73582
ENSMUSG00000019841.15	Rev3l	271.04	0.803926	0.234564	-3.42732	0.000609573	0.0304363	1.76075	0.840724	1.72595	2.38635	1.93553	2.42249
ENSMUSG00000011884.13	Gltp	830.074	-0.5298	0.153807	3.44457	0.000571972	0.0304363	-1.81759	-1.90757	-1.92464	-2.26722	-2.33225	-2.71971
ENSMUSG00000056342.16	Usp34	1983.7	0.847229	0.246969	-3.4305	0.000602465	0.0304363	1.69708	0.967777	1.66038	2.57272	1.98281	2.25718
ENSMUSG00000001833.17	Sept7	6438.83	0.768714	0.225314	-3.41175	0.00064548	0.0304363	1.28029	1.04262	1.46335	2.55358	1.67757	1.93084
ENSMUSG00000049550.17	Clip1	1150.41	0.575783	0.167552	-3.43645	0.000589393	0.0304363	0.885749	0.567724	0.753009	1.59538	0.997112	1.34636
ENSMUSG00000021693.20	Kif2a	1416.2	0.599437	0.175561	-3.41442	0.000639185	0.0304363	1.18367	0.74807	1.02814	1.90903	1.37202	1.48111
ENSMUSG00000052727.6	Map1b	5890.49	0.941596	0.272422	-3.45639	0.000547465	0.0304363	2.7932	1.72988	1.89052	2.98223	2.71999	3.26605
ENSMUSG00000057110.15	Cntrl	223.074	0.792647	0.232508	-3.40911	0.000651747	0.0305648	0.762452	0.174029	0.627	1.63526	1.01789	1.34004
ENSMUSG00000023286.16	Ube2j2	913.589	-0.61935	0.181787	3.407	0.000656806	0.0306356	-2.84116	-2.83546	-2.7461	-3.25389	-3.86482	-3.47726
ENSMUSG00000066036.14	Ubr4	6711.93	0.569641	0.167637	-3.39807	0.000678633	0.0307096	0.932416	0.456168	0.553237	1.05736	1.22774	1.29439
ENSMUSG00000001627.12	Ifrd1	1705.6	0.615291	0.181557	-3.38897	0.000701555	0.0307096	0.705871	0.3372	0.724806	1.30446	1.17169	1.13446
ENSMUSG00000035413.8	Tmem98	799.162	-0.563585	0.165964	3.39581	0.000684247	0.0307096	-1.01324	-1.061	-0.837526	-1.75747	-1.32914	-1.52493
ENSMUSG00000048076.14	Arf1	9350.18	-0.447418	0.131672	3.39798	0.000678861	0.0307096	-2.94365	-2.92399	-2.91539	-3.22364	-3.4325	-3.52773
ENSMUSG00000033282.14	Rpgrip1l	243.028	0.670876	0.197968	-3.38881	0.000701972	0.0307096	1.50299	1.16847	1.56921	2.28794	1.98895	2.1062
ENSMUSG00000021392.8	Nol8	577.329	0.716355	0.2111	-3.39344	0.000690208	0.0307096	1.27754	1.07801	1.46386	2.40927	1.7835	1.88242
ENSMUSG00000020075.8	Ddx21	5816.67	0.518465	0.152703	-3.39525	0.000685666	0.0307096	0.531851	0.136133	0.406646	1.06241	0.597598	0.920525
ENSMUSG00000044147.8	Arf6	1538.91	-0.381837	0.112757	3.38638	0.000708217	0.0307096	-0.0811189	-0.0211464	-0.0881583	-0.495919	-0.431421	-0.452193
ENSMUSG00000036572.16	Upf3b	243.96	0.644755	0.189612	-3.40039	0.000672909	0.0307096	0.643698	0.678119	0.45269	1.23155	1.10342	1.37203
ENSMUSG00000028649.21	Macf1	4100.44	0.707021	0.208728	-3.38729	0.000705862	0.0307096	1.68809	1.11249	1.44027	2.10102	1.88429	2.27827
ENSMUSG00000038418.7	Egr1	2330.41	-1.08765	0.320217	3.39659	0.000682307	0.0307096	1.97198	0.466195	1.40081	0.529939	-0.121376	0.0264855
ENSMUSG00000061755.10	Bod1l	1636.93	0.713697	0.209641	-3.40437	0.000663158	0.0307096	2.13578	1.58224	2.01972	2.92926	2.17152	2.74803
ENSMUSG00000026279.14	Thap4	775.213	-0.497355	0.146629	3.39192	0.000694045	0.0307096	-0.221707	-0.15416	-0.288716	-0.733554	-0.703945	-0.780336
ENSMUSG00000031987.6	Egln1	763.383	-0.491289	0.145024	3.38764	0.000704966	0.0307096	-1.9593	-1.91699	-1.97895	-2.60598	-2.42521	-2.31666
ENSMUSG00000045503.16	Sys1	403.667	-0.778768	0.230067	3.38497	0.000711865	0.0307134	-2.01307	-1.46407	-1.92743	-2.46483	-2.23602	-3.05929
ENSMUSG00000022350.7	Washc5	2556.68	0.371478	0.109938	-3.37899	0.000727537	0.0311964	0.21239	-0.0297456	0.15627	0.526999	0.418984	0.459979
ENSMUSG00000030451.16	Herc2	2007.19	0.632277	0.187253	-3.37659	0.000733905	0.0311964	1.35172	0.880928	1.13629	1.62461	1.63045	1.93085
ENSMUSG00000024691.13	Fam111a	1385.84	0.790047	0.233924	-3.37737	0.000731823	0.0311964	1.50776	0.776751	1.2045	2.4025	1.63703	1.83341
ENSMUSG00000037646.10	Vps13b	398.8	0.90021	0.266884	-3.37304	0.000743432	0.0314464	1.8467	0.832003	1.50284	2.64964	1.83789	2.38574
ENSMUSG00000059263.9	Usp47	3401.33	0.660018	0.195777	-3.37127	0.000748219	0.0314946	1.05388	0.492334	0.875841	1.85177	1.1756	1.35072
ENSMUSG00000000295.13	Hddc2	256.606	0.658862	0.195584	-3.36868	0.000755283	0.0314955	0.331263	0.183062	0.0813314	0.907918	0.693173	0.970278
ENSMUSG00000035181.6	Heatr5a	2719.7	0.519825	0.154315	-3.36859	0.000755541	0.0314955	0.980817	0.391072	0.679852	1.28005	1.02805	1.22576
ENSMUSG00000025968.16	Ndufs1	2387.33	0.498994	0.148209	-3.36683	0.000760385	0.031545	0.970163	0.97345	1.05619	1.80895	1.30013	1.39647
ENSMUSG00000037706.17	Cd81	11047.9	-0.318946	0.0948848	3.3614	0.000775486	0.0320175	1.54781	1.50543	1.53609	1.07912	1.22275	1.29139
ENSMUSG00000042978.11	Sbk1	263.983	-0.891397	0.265478	3.35771	0.000785918	0.0321407	-2.21359	-1.75113	-2.0752	-3.14225	-2.73122	-2.80279
ENSMUSG00000070493.3	Chchd2	1988.57	-1.10463	0.328966	3.35789	0.00078541	0.0321407	-6.99	-5.90459	-5.92232	-7.01892	-7.25789	-8.18711
ENSMUSG00000018167.10	Stard3	395.784	-0.64017	0.191339	3.34573	0.000820654	0.0327844	-1.09409	-0.70778	-0.790841	-1.68049	-1.47044	-1.40922
ENSMUSG00000031451.6	Gas6	4927.92	-0.541511	0.161696	3.34893	0.000811231	0.0327844	-1.19984	-0.974646	-1.00966	-1.80854	-1.51103	-1.51663
ENSMUSG00000038975.14	Rabggtb	905.692	0.540416	0.161406	-3.34817	0.000813457	0.0327844	0.135488	0.152989	0.175234	0.756281	0.689248	0.636594
ENSMUSG00000020949.9	Fkbp3	1766.62	0.867788	0.259163	-3.34843	0.000812698	0.0327844	1.50039	1.38974	1.53728	2.94129	2.10247	2.12293
ENSMUSG00000039828.7	Wdr70	694.857	0.452757	0.135302	-3.34627	0.000819075	0.0327844	-0.291746	-0.387241	-0.371551	0.0193996	-0.00319121	0.229812
ENSMUSG00000028312.19	Smc2	1889	0.813337	0.243294	-3.34302	0.000828712	0.0329537	1.90302	1.35055	1.97764	3.09637	2.3209	2.3639
ENSMUSG00000030530.15	Furin	2838.17	-0.411408	0.123187	3.33971	0.000838645	0.0331957	-0.686245	-0.864952	-0.737245	-1.28158	-1.18357	-1.11257
ENSMUSG00000019254.16	Ppp1r12c	1267.07	-0.499008	0.149497	3.33791	0.000844096	0.0332589	-1.76421	-1.80263	-2.00281	-2.52992	-2.19036	-2.36294
ENSMUSG00000020705.6	Ddx42	1500.15	0.435388	0.130562	-3.33472	0.000853854	0.0334292	0.490577	0.0600529	0.29522	0.784618	0.56685	0.729146
ENSMUSG00000034311.3	Kif4	1024.68	0.568721	0.170584	-3.33397	0.000856166	0.0334292	1.26967	0.699391	1.09549	1.81497	1.33364	1.56791
ENSMUSG00000026305.15	Lrrfip1	5371	0.565701	0.170049	-3.3267	0.000878807	0.0341587	1.02276	0.725858	0.89791	1.75707	1.21143	1.36306
ENSMUSG00000063450.14	Syne2	338.06	0.962944	0.289702	-3.32391	0.000887656	0.0343479	2.06047	0.960683	1.31199	2.43166	2.08943	2.5381
ENSMUSG00000027198.16	Ext2	2689.15	-0.449368	0.135351	3.32001	0.000900157	0.0346168	0.721391	0.666889	0.626343	0.0383736	0.344535	0.260348
ENSMUSG00000067873.11	Htatsf1	655.627	0.552462	0.166442	-3.31924	0.000902628	0.0346168	0.359369	0.292042	0.247225	1.20328	0.609226	0.744094
ENSMUSG00000028187.10	Rpf1	638.584	0.653555	0.197551	-3.30829	0.000938668	0.0358397	1.36293	0.986884	1.47621	2.23618	1.5729	1.98901
ENSMUSG00000013858.14	Tmem259	1762.64	-0.60909	0.184234	3.30607	0.000946145	0.035966	-0.885544	-0.757747	-0.716252	-1.47949	-1.1612	-1.57941
ENSMUSG00000036693.12	Nop14	1702.76	0.531545	0.160911	-3.30335	0.000955358	0.0359991	0.38683	0.316378	0.394627	1.16831	0.759616	0.773296
ENSMUSG00000058325.6	Dock1	1658.91	0.493498	0.149377	-3.30371	0.000954135	0.0359991	0.488685	0.117777	0.425923	1.0617	0.606237	0.800872
ENSMUSG00000035024.16	Ncapd3	743.408	0.571926	0.173371	-3.29886	0.000970792	0.0364216	1.69927	1.10426	1.39711	2.01901	1.8205	2.00962
ENSMUSG00000001211.15	Agpat3	1432.79	-0.444132	0.134741	3.2962	0.000980032	0.0366091	-2.11188	-2.07531	-2.05937	-2.52476	-2.48376	-2.63711
ENSMUSG00000028233.6	Tgs1	374.01	0.658792	0.20023	-3.29017	0.00100128	0.037049	0.559988	0.115241	0.459543	1.28941	0.829678	1.03679
ENSMUSG00000047547.14	Cltb	1486.46	-0.484709	0.147363	3.28921	0.00100469	0.037049	-1.16015	-1.00663	-1.14561	-1.74312	-1.56487	-1.50316
ENSMUSG00000020821.17	Kif1c	4746.81	-0.428112	0.130137	3.2897	0.00100294	0.037049	-2.38332	-2.19552	-2.42829	-2.94108	-2.69181	-2.68479
ENSMUSG00000024856.10	Cdk2ap2	409.669	-0.581545	0.17694	3.28668	0.00101377	0.03709	-0.759851	-0.694078	-0.752055	-1.37552	-1.37269	-1.2915
ENSMUSG00000028053.13	Ash1l	1296.37	0.777693	0.236632	-3.2865	0.0010144	0.03709	1.91506	1.05275	1.75149	2.60825	1.94635	2.43029
ENSMUSG00000033671.18	Cep350	531.073	0.688358	0.209543	-3.28505	0.00101965	0.0371246	1.75005	1.08517	1.52504	2.36029	1.91157	2.08462
ENSMUSG00000039298.16	Cdk5rap2	776.871	0.440024	0.134353	-3.27514	0.00105609	0.0381296	0.134303	0.0821791	0.257627	0.640275	0.504759	0.604689
ENSMUSG00000032407.14	U2surp	1532.68	0.796205	0.24307	-3.27562	0.00105429	0.0381296	1.02679	0.4722	1.0632	2.25277	1.2697	1.52914
ENSMUSG00000028156.12	Eif4e	1153.82	0.606287	0.185329	-3.27141	0.00107012	0.0381574	-3.50112	-3.80818	-3.81681	-3.09461	-3.13171	-3.05918
ENSMUSG00000000378.15	Ccm2	1574.18	-0.561275	0.171553	3.27173	0.00106891	0.0381574	-2.96756	-2.64064	-2.76837	-3.51856	-3.16382	-3.38374
ENSMUSG00000029634.15	Rnf6	816.342	0.546711	0.166998	-3.27375	0.00106129	0.0381574	0.947699	0.713565	1.00139	1.7031	1.34835	1.2627
ENSMUSG00000027187.10	Cat	2094.67	0.433154	0.13268	-3.26464	0.00109601	0.0385835	0.920653	1.12628	0.929526	1.55957	1.38582	1.32112
ENSMUSG00000043940.15	Wdfy3	1419	0.628654	0.192542	-3.26502	0.00109458	0.0385835	1.02163	0.255605	0.635202	1.20362	1.05869	1.43942
ENSMUSG00000019726.12	Lyst	416.212	0.73267	0.224496	-3.26363	0.00109996	0.0385835	2.34678	1.43112	2.21751	3.02063	2.41069	2.7126
ENSMUSG00000044496.6	2510039O18Rik	1077.02	-0.553019	0.16942	3.26418	0.00109782	0.0385835	-0.495857	-0.199619	-0.479791	-0.96758	-0.842542	-1.03929
ENSMUSG00000010608.15	Rbm25	1884.6	0.458394	0.140633	-3.2595	0.00111608	0.0389904	0.441595	0.0864431	0.314866	0.851588	0.419829	0.882139
ENSMUSG00000007415.15	Gatad1	1412.51	-0.517059	0.159017	3.2516	0.00114759	0.0399297	-1.86757	-2.08122	-1.7874	-2.4013	-2.48945	-2.43802
ENSMUSG00000094410.8	Gm38394	898.738	0.827811	0.254743	-3.2496	0.00115568	0.0400497	2.09038	1.19648	2.09651	2.94289	2.23439	2.75165
ENSMUSG00000021149.8	Gtpbp4	2268.05	0.57323	0.176636	-3.24526	0.00117343	0.040502	0.414393	0.302387	0.470818	1.29103	0.818503	0.827073
ENSMUSG00000029290.12	Zfp326	689.52	0.518843	0.159993	-3.2429	0.00118318	0.0406297	1.19765	1.02414	1.32962	1.99624	1.46976	1.68173
ENSMUSG00000022329.15	Stk3	582.387	0.832925	0.256909	-3.24209	0.00118654	0.0406297	0.645415	0.720725	0.926991	2.21915	1.12117	1.54039
ENSMUSG00000020385.16	Clk4	232.041	0.748004	0.230819	-3.24065	0.00119256	0.0406743	0.754553	0.626623	0.452935	1.76163	1.13975	1.29246
ENSMUSG00000020900.15	Myh10	12483.1	0.644845	0.199162	-3.23779	0.0012046	0.0409233	1.54573	0.855306	0.967268	1.64632	1.57145	1.97026
ENSMUSG00000074656.12	Eif2s2	2289.43	0.641279	0.198231	-3.23502	0.00121636	0.041	-1.38388	-1.57102	-1.31301	-0.4412	-0.882505	-0.975341
ENSMUSG00000007827.10	Ankrd26	245.062	0.702776	0.217236	-3.23508	0.00121609	0.041	1.10468	0.869845	1.25901	2.15119	1.7038	1.59409
ENSMUSG00000021500.17	Ddx46	1870.11	0.589808	0.182477	-3.23224	0.00122825	0.0410797	0.595417	0.153762	0.408266	1.34135	0.657979	0.922803
ENSMUSG00000015749.12	Anp32e	1267.03	0.515287	0.159398	-3.23271	0.0012262	0.0410797	0.275264	0.0983845	0.166455	0.967419	0.483669	0.596319
ENSMUSG00000029414.11	Kntc1	877.182	0.599174	0.185478	-3.23043	0.00123604	0.0411807	1.3178	0.695379	1.17983	1.80613	1.46088	1.67075
ENSMUSG00000029484.12	Anxa3	8148.64	0.476911	0.147784	-3.22708	0.0012506	0.0415056	0.300266	0.555534	0.63182	1.06885	0.905929	0.905599
ENSMUSG00000033400.14	Agl	1114.19	0.514167	0.159414	-3.22535	0.00125817	0.0415967	0.667416	0.542064	0.592783	1.46599	0.908022	0.962961
ENSMUSG00000056952.13	Tatdn2	1049.5	-0.530153	0.164459	3.22362	0.0012658	0.0416892	-1.73257	-1.69464	-1.70032	-2.41303	-2.01692	-2.28662
ENSMUSG00000020520.14	Galnt10	2044.87	-0.432571	0.134532	3.21537	0.00130277	0.0427438	-1.30218	-1.40067	-1.30874	-1.91543	-1.73166	-1.70676
ENSMUSG00000020700.11	Map3k3	883.75	-0.480652	0.149545	3.2141	0.00130855	0.0427706	-1.81567	-1.80691	-1.75333	-2.2031	-2.31381	-2.40704
ENSMUSG00000021143.10	Pacs2	1188.85	-0.573472	0.178823	3.20692	0.00134166	0.0430541	-2.14058	-2.14817	-2.43683	-2.92892	-2.94827	-2.65462
ENSMUSG00000027206.13	Cops2	2203.96	0.897439	0.279752	-3.20798	0.0013367	0.0430541	0.811153	0.564887	1.03535	2.35705	1.4235	1.51258
ENSMUSG00000020592.14	Sdc1	3265.71	-0.405267	0.126417	3.2058	0.00134688	0.0430541	-0.0719806	-0.0128348	-0.113739	-0.70719	-0.308957	-0.431093
ENSMUSG00000027272.5	Ubr1	723.549	0.749852	0.233909	-3.20574	0.00134716	0.0430541	1.77083	1.0302	1.44489	2.6172	1.63197	2.23693
ENSMUSG00000048696.11	Mex3d	745.286	-0.832029	0.259411	3.20737	0.00133953	0.0430541	-1.59704	-1.06213	-1.06256	-2.00513	-1.94612	-2.30927
ENSMUSG00000053510.12	Nrd1	2701.56	0.391511	0.121977	-3.20972	0.00132863	0.0430541	0.236193	0.150875	0.238312	0.843657	0.437522	0.488728
ENSMUSG00000022967.13	Ifnar1	923.049	-0.401795	0.125399	3.20414	0.00135469	0.0430731	-0.102737	-0.221345	0.196154	-0.446279	-0.553537	-0.367175
ENSMUSG00000063015.12	Ccni	1331.92	-0.767866	0.239697	3.20349	0.00135773	0.0430731	-4.29904	-4.62483	-4.05424	-4.83605	-6.18733	-4.89965
ENSMUSG00000028479.18	Gne	984.161	-0.383671	0.119885	3.20034	0.00137266	0.0433871	0.0109943	-0.170882	-0.0683096	-0.475699	-0.452836	-0.504084
ENSMUSG00000044763.8	Trmt10c	511.521	0.666262	0.208516	-3.19525	0.0013971	0.0435958	1.41796	1.33736	1.93399	2.6263	2.00531	2.16536
ENSMUSG00000022965.8	Ifngr2	1317.41	-0.531871	0.16635	3.19731	0.00138716	0.0435958	-1.80259	-1.77308	-1.55774	-2.07455	-2.53396	-2.26891
ENSMUSG00000026872.18	Zeb2	1231.75	0.661794	0.20715	-3.19476	0.00139947	0.0435958	1.26585	0.837714	1.17662	2.1817	1.36493	1.73087
ENSMUSG00000021109.13	Hif1a	4412.04	0.701141	0.219336	-3.19665	0.00139032	0.0435958	2.11476	1.71773	2.21359	3.18377	2.41954	2.59801
ENSMUSG00000035914.11	Cd276	1198.34	-0.491628	0.15421	3.18803	0.00143244	0.0438317	-0.883392	-0.98152	-1.24589	-1.54103	-1.47344	-1.6366
ENSMUSG00000018040.9	Rrp7a	1838.07	-0.523988	0.164234	3.1905	0.00142029	0.0438317	-2.35835	-2.38915	-2.37967	-2.90683	-2.97887	-2.91199
ENSMUSG00000026176.13	Ctdsp1	1165.11	-0.577194	0.180996	3.18898	0.00142774	0.0438317	-3.41937	-3.75301	-3.40447	-4.30335	-3.7887	-4.17444
ENSMUSG00000019820.11	Utrn	3434.58	0.67002	0.210109	-3.18891	0.00142808	0.0438317	1.94544	1.31103	1.53327	2.51036	1.9693	2.23218
ENSMUSG00000044791.16	Setd2	1346.69	0.7693	0.241034	-3.19167	0.00141453	0.0438317	1.9022	1.10936	1.80218	2.71604	1.93489	2.46827
ENSMUSG00000031004.8	Mki67	2969.14	0.852047	0.267481	-3.18545	0.00144529	0.0439135	2.06386	0.935746	1.71456	2.73308	1.94117	2.49056
ENSMUSG00000022808.5	Snx4	1503.1	0.532967	0.16729	-3.18588	0.00144315	0.0439135	-0.438732	-0.555985	-0.412054	0.26991	-0.0700378	0.00981021
ENSMUSG00000039233.12	Tbce	406.195	0.607898	0.191071	-3.18153	0.001465	0.0442229	0.787774	0.821954	0.737028	1.41993	1.26016	1.45402
ENSMUSG00000021484.8	Lman2	4043.09	-0.343365	0.107929	3.18139	0.00146572	0.0442229	-0.876961	-0.668282	-0.641199	-1.05309	-1.02814	-1.16988
ENSMUSG00000027907.4	S100a11	14067.9	-0.463859	0.145859	3.18018	0.00147184	0.0442527	-2.3012	-1.90915	-2.34498	-2.63975	-2.56623	-2.7596
ENSMUSG00000025982.13	Sf3b1	7337.92	0.564605	0.177657	-3.17805	0.00148267	0.0442697	1.32114	0.944508	1.20644	2.05139	1.50049	1.61552
ENSMUSG00000028248.15	Pnisr	484.742	0.546526	0.171918	-3.179	0.00147783	0.0442697	0.941473	0.575098	0.913727	1.51228	1.07165	1.47509
ENSMUSG00000029104.15	Htt	1275.57	0.49479	0.155886	-3.17405	0.00150327	0.0445762	0.197646	0.0859983	0.176541	0.434541	0.693724	0.794332
ENSMUSG00000062762.17	Ei24	2758.73	-0.406803	0.128147	3.17449	0.001501	0.0445762	-1.67909	-1.77517	-1.47483	-2.06151	-2.0012	-2.11134
ENSMUSG00000043535.13	Setx	1102.77	0.781086	0.246297	-3.17131	0.00151751	0.0448446	1.60591	1.07368	1.90734	2.66358	1.86572	2.4074
ENSMUSG00000006678.6	Pola1	819.459	0.887158	0.280382	-3.1641	0.00155564	0.0458143	1.55649	0.812882	1.47484	2.82001	1.79169	2.01836
ENSMUSG00000041889.7	Shisa4	770.573	-0.497705	0.157462	3.16079	0.00157343	0.0461807	-0.627536	-0.620399	-0.428101	-1.24878	-1.17	-0.855915
ENSMUSG00000046753.10	Ccdc66	216.343	0.834418	0.264115	-3.1593	0.0015815	0.0462603	1.69571	0.910919	1.51956	2.82817	1.79501	2.125
ENSMUSG00000032741.9	Tpcn1	703.593	-0.524534	0.166182	3.15638	0.0015974	0.0465675	-1.43369	-1.4682	-1.49349	-2.01279	-1.93111	-2.09348
ENSMUSG00000037958.13	Nsrp1	476.688	0.563915	0.178736	-3.15502	0.00160489	0.0466282	0.719553	0.836489	0.903288	1.76106	1.17752	1.21198
ENSMUSG00000030614.8	Tmem126b	390.702	0.725808	0.230203	-3.15291	0.00161651	0.0468083	0.611979	0.630007	1.13098	1.9873	1.32484	1.35977
ENSMUSG00000020687.13	Cdc27	2018.63	0.721265	0.229001	-3.14961	0.00163488	0.0468685	1.67683	1.09373	1.72568	2.68379	1.87791	2.13382
ENSMUSG00000025272.16	Tro	664.134	0.522048	0.165707	-3.15043	0.00163028	0.0468685	0.842632	0.908417	0.808621	1.34001	1.5127	1.24708
ENSMUSG00000044308.17	Ubr3	1573.89	0.606019	0.192337	-3.15081	0.00162816	0.0468685	1.56741	1.1531	1.53982	2.3451	1.75832	1.96636
ENSMUSG00000078429.9	Ctdsp2	1762.06	-0.7983	0.253631	3.14749	0.0016468	0.0470537	-4.75333	-5.40707	-5.15762	-6.05609	-5.5496	-6.09124
ENSMUSG00000047141.5	Zfp654	270.02	0.879503	0.279961	-3.14152	0.00168074	0.0471226	1.51972	1.33033	2.13271	3.11873	2.19704	2.55216
ENSMUSG00000017146.12	Brca1	367.41	0.701107	0.222971	-3.14439	0.00166435	0.0471226	1.89028	1.06843	1.62393	2.35844	1.92488	2.37243
ENSMUSG00000041840.8	Haus1	272.332	0.681304	0.21686	-3.14167	0.00167988	0.0471226	0.286703	-0.183215	0.0659204	1.09163	0.767699	0.403192
ENSMUSG00000048787.13	Dcun1d3	381.404	-0.590316	0.187921	3.1413	0.00168197	0.0471226	-0.175132	-0.294062	0.231856	-0.37474	-0.81795	-0.933416
ENSMUSG00000020288.13	Ahsa2	686.686	0.508748	0.161839	-3.14354	0.00166916	0.0471226	1.64052	1.60591	1.65046	2.30775	1.92658	2.1516
ENSMUSG00000047843.16	Bri3	1078.72	-0.865623	0.275415	3.14297	0.00167241	0.0471226	-1.60492	-1.3846	-1.16498	-1.93928	-2.40531	-2.54781
ENSMUSG00000052684.4	Jun	2820.98	-0.521928	0.166378	3.137	0.00170686	0.0476651	0.85358	0.389277	1.0426	0.159914	0.126567	0.383476
ENSMUSG00000030528.12	Blm	399.531	0.816225	0.260376	-3.13479	0.00171975	0.04787	1.38391	0.97808	1.47236	2.60606	1.67755	2.08721
ENSMUSG00000022789.15	Dnm1l	1545.27	0.745588	0.238167	-3.13053	0.00174492	0.0484145	0.959279	0.765559	1.05868	2.21661	1.35436	1.56378
ENSMUSG00000042569.13	Dhrs7b	667.23	-0.471103	0.150551	3.1292	0.00175283	0.0484781	-0.0197277	0.193983	0.0265152	-0.536957	-0.370728	-0.341752
ENSMUSG00000037725.8	Ckap2	1840.29	0.412573	0.131926	-3.12732	0.0017641	0.0486338	1.51854	1.16666	1.4638	1.95243	1.55276	1.84437
ENSMUSG00000031010.17	Usp9x	4459.65	0.815702	0.261787	-3.1159	0.00183384	0.0503955	2.33258	1.66851	2.30673	3.43859	2.51685	2.85278
ENSMUSG00000042133.16	Ppig	810.955	0.70031	0.224976	-3.11281	0.00185312	0.0507638	-0.0712086	-0.434914	0.0265324	1.05544	-0.0322763	0.551616
ENSMUSG00000036273.15	Lrrk2	806.797	0.634007	0.203768	-3.11142	0.0018619	0.0508428	1.03073	0.748258	0.995036	1.98003	1.30139	1.43346
ENSMUSG00000029253.12	Cenpc1	466.141	0.632821	0.203464	-3.11024	0.00186936	0.0508854	1.20804	0.738194	1.1849	2.04823	1.42946	1.63432
ENSMUSG00000036613.8	Eipr1	411.309	-0.546484	0.175838	3.10788	0.00188431	0.050971	-0.274869	-0.333775	-0.302671	-0.873222	-0.995195	-0.847097
ENSMUSG00000035898.13	Uba6	2547.38	0.771375	0.248129	-3.10877	0.00187868	0.050971	2.02895	1.59065	2.11146	3.20865	2.39536	2.52741
ENSMUSG00000026817.14	Ak1	4876.49	-0.403821	0.130048	3.10516	0.00190174	0.0512815	-0.810685	-0.600413	-0.757315	-1.16826	-1.1333	-1.12939
ENSMUSG00000031529.5	Tnks	1986.49	0.613686	0.197808	-3.10244	0.00191932	0.0515945	1.22497	0.731275	1.04039	1.83041	1.36872	1.59808
ENSMUSG00000003345.16	Csnk1g2	2438.47	-0.536545	0.173438	3.09358	0.00197757	0.0520258	-3.6492	-3.57594	-3.91135	-4.50135	-3.92407	-4.30448
ENSMUSG00000055980.2	Irs1	1457.1	0.589709	0.190416	-3.09695	0.00195523	0.0520258	1.99572	2.10307	2.28505	3.00852	2.5373	2.63457
ENSMUSG00000024858.14	Grk2	1702.83	-0.422587	0.136574	3.0942	0.00197346	0.0520258	-1.50642	-1.37395	-1.50457	-2.05079	-1.63597	-1.98081
ENSMUSG00000040842.17	Szrd1	1797.17	-0.444465	0.143562	3.09599	0.00196159	0.0520258	-2.24714	-2.17463	-2.24485	-2.58844	-2.79877	-2.72332
ENSMUSG00000038696.14	Mapkap1	720.695	-0.445573	0.14402	3.09382	0.00197596	0.0520258	-0.433802	-0.530531	-0.212352	-0.905192	-0.844785	-0.782421
ENSMUSG00000046230.11	Vps13a	865.943	0.880682	0.284364	-3.09702	0.00195477	0.0520258	2.15416	1.75091	2.336	3.74549	2.44919	2.85948
ENSMUSG00000042354.7	Gnl3	1780.43	0.618297	0.199711	-3.09596	0.00196175	0.0520258	0.743862	0.517008	0.819005	1.67312	1.09651	1.21059
ENSMUSG00000002718.14	Cse1l	4610.1	0.581643	0.188585	-3.08424	0.00204071	0.0527237	1.59602	1.10505	1.56572	2.34113	1.78412	1.89171
ENSMUSG00000020806.15	Rhbdf2	303.012	-0.508076	0.164733	3.08424	0.00204076	0.0527237	0.532018	0.668074	0.879149	0.115644	0.315856	0.117566
ENSMUSG00000050812.18	Ecpas	2415.8	0.578632	0.187472	-3.08649	0.00202533	0.0527237	1.13413	0.94	1.30593	2.09971	1.53224	1.52829
ENSMUSG00000024943.9	Smc5	1129.24	0.825987	0.267698	-3.08552	0.00203195	0.0527237	1.59161	1.07511	1.54634	2.76936	1.85958	2.14305
ENSMUSG00000053289.8	Ddx10	674.605	0.751486	0.243478	-3.08646	0.00202553	0.0527237	0.929686	0.53193	0.796413	2.0578	1.18982	1.37593
ENSMUSG00000033054.7	Npat	662.36	0.656452	0.212709	-3.08615	0.00202765	0.0527237	1.89595	1.33452	1.9213	2.72047	2.06071	2.38342
ENSMUSG00000002603.15	Tgfb1	1343.38	-0.527852	0.171369	3.08021	0.00206856	0.0528095	-0.192169	-0.785487	-0.532444	-1.17091	-1.02806	-0.967997
ENSMUSG00000037236.16	Matr3	1691.77	0.751865	0.244068	-3.08055	0.00206617	0.0528095	1.20852	1.08727	1.31191	2.58993	1.70982	1.70244
ENSMUSG00000035799.6	Twist1	718.376	-0.459905	0.149203	3.08241	0.00205329	0.0528095	-0.303604	-0.332249	-0.0427238	-0.893353	-0.636471	-0.539449
ENSMUSG00000030753.15	Thap12	743.457	0.545681	0.177152	-3.0803	0.00206793	0.0528095	-1.45859	-1.60199	-1.03718	-0.632752	-1.10042	-0.769535
ENSMUSG00000068240.5	Gm11808	1598.68	-1.90819	0.619694	3.07925	0.00207525	0.0528239	-7.69145	-7.57036	-7.51721	-9.61257	-8.41236	-10.7774
ENSMUSG00000006740.14	Kif5b	4802.07	0.81944	0.266373	-3.07629	0.00209594	0.053165	1.35401	1.026	1.58716	2.75931	1.82106	1.95848
ENSMUSG00000020422.14	Tns3	4989.65	0.393215	0.127851	-3.07558	0.00210097	0.053165	0.812487	0.454971	0.638285	0.895242	1.00571	1.13231
ENSMUSG00000041161.8	Otud3	198.279	-0.747825	0.243337	3.07321	0.00211772	0.0533648	-1.48256	-1.27231	-1.05477	-2.38148	-1.51844	-2.07197
ENSMUSG00000059713.12	Rcan3	240.573	-0.865084	0.281539	3.0727	0.00212134	0.0533648	-2.43866	-2.28801	-1.5027	-3.09049	-2.31645	-3.28654
ENSMUSG00000031583.13	Wrn	299.855	0.685287	0.223087	-3.07184	0.00212742	0.0533648	1.57622	1.51436	1.50462	2.3437	2.01237	2.33848
ENSMUSG00000031095.15	Cul4b	2221.87	0.723321	0.235624	-3.06981	0.00214197	0.0535741	1.45807	1.42445	1.73549	2.84305	1.87145	2.18066
ENSMUSG00000030335.6	Mrpl51	576.165	0.648586	0.211374	-3.06843	0.00215186	0.053666	-3.35988	-3.09536	-3.66247	-2.6771	-2.33746	-3.11375
ENSMUSG00000018593.13	Sparc	83061.3	-0.342001	0.111509	3.06702	0.00216204	0.0537645	0.472965	0.559121	0.417022	0.0381455	0.127586	0.231211
ENSMUSG00000052837.6	Junb	2774.67	-0.576025	0.188052	3.06312	0.0021904	0.0540028	0.421338	0.475421	0.902375	0.17073	-0.0539399	-0.131665
ENSMUSG00000047193.16	Dync2h1	226.709	0.920544	0.300374	-3.06466	0.00217918	0.0540028	2.45051	1.39026	2.33763	3.70796	2.55104	2.74267
ENSMUSG00000035649.17	Zcchc7	247.851	0.759559	0.247922	-3.06371	0.00218613	0.0540028	0.740493	0.0124581	0.664038	1.58229	1.00822	1.22425
ENSMUSG00000019579.13	Mydgf	1848.89	-0.362889	0.118583	3.0602	0.0022119	0.0543775	-0.759557	-0.58062	-0.810888	-1.13173	-0.999873	-1.14511
ENSMUSG00000030082.14	Sec61a1	8452.12	-0.334618	0.109463	3.0569	0.00223635	0.0548225	1.17426	1.03268	1.07637	0.631634	0.738328	0.87036
ENSMUSG00000027787.14	Nmd3	1802.2	0.756994	0.24781	-3.05473	0.0022526	0.0550643	0.86202	0.743886	1.02419	2.25795	1.28338	1.48424
ENSMUSG00000029076.14	Sdf4	2348.02	-0.401561	0.131526	3.05309	0.00226496	0.0551102	-0.889221	-0.755494	-0.812953	-1.30267	-1.16754	-1.24187
ENSMUSG00000000934.9	Top1mt	221.074	0.695329	0.227784	-3.05257	0.00226889	0.0551102	-0.784172	-0.800051	-1.11751	-0.669622	-0.120494	0.110281
ENSMUSG00000024974.10	Smc3	1753.78	0.687615	0.225428	-3.05026	0.00228641	0.0551102	1.4271	0.907056	1.37131	2.44898	1.54551	1.83622
ENSMUSG00000055670.14	Zzef1	2184.85	0.379045	0.124211	-3.05162	0.00227607	0.0551102	0.830042	0.546516	0.824218	1.01055	1.08844	1.18101
ENSMUSG00000033149.17	Phldb2	6678.63	0.558143	0.182979	-3.05031	0.00228608	0.0551102	1.07781	0.832264	1.01867	1.8622	1.26462	1.47173
ENSMUSG00000038268.4	Ovca2	251.241	-0.651651	0.213886	3.04672	0.00231351	0.0556081	0.786738	1.06391	0.537841	-0.00320998	0.27956	0.234956
ENSMUSG00000054051.7	Ercc6	405.523	0.617751	0.203026	-3.04272	0.00234449	0.0558856	1.2719	0.858828	1.08607	1.79416	1.52428	1.79421
ENSMUSG00000039286.12	Fndc3b	4857.83	0.626592	0.205902	-3.04316	0.00234104	0.0558856	1.99508	1.24916	1.64082	2.41652	1.9354	2.30315
ENSMUSG00000028383.17	Hsdl2	416.039	0.74013	0.243226	-3.04297	0.00234254	0.0558856	0.695527	0.833924	0.856682	1.9488	1.25107	1.52732
ENSMUSG00000027162.7	Lin7c	742.871	0.714476	0.235174	-3.03808	0.00238093	0.0562423	0.420342	0.205032	0.806434	1.70723	0.80147	1.13544
ENSMUSG00000030352.15	Tspan9	1958.51	-0.451275	0.148564	3.03758	0.00238486	0.0562423	-0.909723	-0.768119	-0.677868	-1.43176	-1.34609	-0.994493
ENSMUSG00000015087.14	Rabl6	1178.29	-0.512659	0.168708	3.03873	0.0023758	0.0562423	-2.14196	-2.01231	-1.89732	-2.48367	-2.43735	-2.7427
ENSMUSG00000062127.11	Cttnbp2nl	2242.49	0.438473	0.144354	-3.0375	0.00238552	0.0562423	1.00817	0.699509	0.905092	1.3665	1.17012	1.34795
ENSMUSG00000005732.14	Ranbp1	3524.72	0.283107	0.0933298	-3.03341	0.00241807	0.0563528	0.958928	0.794241	0.954821	1.15817	1.10844	1.25259
ENSMUSG00000074748.3	Atxn7l3b	1691.75	-0.442682	0.146042	3.03119	0.00243593	0.0563528	-1.57904	-1.36573	-1.56454	-1.92059	-1.85654	-2.08598
ENSMUSG00000018395.19	Kif3a	472.803	0.458428	0.151114	-3.03366	0.00241609	0.0563528	0.810609	0.580082	0.812213	1.27398	1.06384	1.21045
ENSMUSG00000020440.13	Arf5	2148.16	-0.434845	0.143393	3.03254	0.00242501	0.0563528	-0.63732	-0.460075	-0.648348	-1.15317	-0.815427	-1.10138
ENSMUSG00000033991.9	Ttc37	1115.97	0.613434	0.202335	-3.03177	0.00243122	0.0563528	1.33294	1.09961	1.43234	2.41114	1.61514	1.73936
ENSMUSG00000078794.4	Dact3	598.701	-0.809172	0.266616	3.03498	0.00240555	0.0563528	-0.895274	-0.559167	-0.835092	-1.57907	-1.32714	-1.80829
ENSMUSG00000022427.4	Tomm22	1592.53	-0.543391	0.179158	3.03302	0.00242119	0.0563528	-2.34965	-2.34902	-2.51708	-2.64663	-3.10126	-3.23048
ENSMUSG00000032042.11	Srpr	2389.27	-0.339963	0.112261	3.02832	0.00245919	0.0567389	-1.4827	-1.75224	-1.67136	-1.97019	-2.02614	-1.97684
ENSMUSG00000027108.15	Ola1	2157.59	0.628683	0.20774	-3.0263	0.00247566	0.056815	0.598553	0.572005	0.790068	1.66131	1.03538	1.19057
ENSMUSG00000002265.17	Peg3	5530.27	0.598119	0.197595	-3.027	0.00246995	0.056815	1.70293	1.50621	1.60482	2.30897	1.8904	2.40118
ENSMUSG00000019883.11	Echdc1	209.414	0.863063	0.285533	-3.02264	0.00250577	0.0573537	3.05794	2.46771	2.75538	3.77832	3.33669	3.76567
ENSMUSG00000026083.12	Eif5b	3455.28	0.517333	0.171338	-3.01937	0.00253301	0.0578236	0.40216	-0.0892796	0.242414	0.971032	0.364315	0.726267
ENSMUSG00000030697.7	Ppp4c	2612.81	-0.374371	0.124066	3.01751	0.0025486	0.0578941	-0.577821	-0.488106	-0.439409	-0.935608	-0.773694	-0.955633
ENSMUSG00000027326.13	Knl1	649.096	0.850732	0.282239	-3.01423	0.00257635	0.0578941	2.65136	1.82793	2.88788	3.87736	2.8314	3.40202
ENSMUSG00000034908.16	Sidt2	2914.87	-0.373749	0.123987	3.01442	0.00257471	0.0578941	-1.59837	-1.60069	-1.75211	-2.141	-1.93501	-2.02274
ENSMUSG00000048279.19	Sacs	1208.98	0.736947	0.244375	-3.01564	0.00256441	0.0578941	2.33495	1.78563	2.51714	3.309	2.52724	2.96903
ENSMUSG00000028796.17	Phc2	3870.09	-0.421582	0.139803	3.01554	0.0025652	0.0578941	-1.421	-1.41712	-1.34138	-1.96073	-1.7001	-1.81959
ENSMUSG00000015363.13	Trabd	830.124	-0.479248	0.158952	3.01506	0.0025693	0.0578941	-2.11461	-1.90342	-2.13765	-2.60812	-2.32779	-2.647
ENSMUSG00000020994.5	Pnn	1191.58	0.600246	0.199262	-3.01235	0.00259237	0.0579522	1.02107	0.57905	0.905099	1.87738	1.03215	1.38405
ENSMUSG00000030655.15	Smg1	1452.94	0.708713	0.235212	-3.01308	0.00258609	0.0579522	1.91041	1.14317	1.83913	2.4372	2.07583	2.42031
ENSMUSG00000024247.14	Pkdcc	267.958	-0.874851	0.290613	3.01036	0.00260939	0.0581715	-2.79347	-1.70269	-2.00935	-3.25082	-2.57664	-3.083
ENSMUSG00000040549.16	Ckap5	3926.7	0.706696	0.234812	-3.00963	0.00261566	0.0581715	2.04091	1.32972	1.75263	2.92918	2.03881	2.28762
ENSMUSG00000031278.12	Acsl4	1655.58	0.757507	0.251786	-3.00853	0.00262512	0.0582317	1.78819	1.30571	1.7423	2.91826	2.09583	2.18991
ENSMUSG00000023066.10	Rttn	313.729	0.566913	0.188708	-3.00419	0.0026629	0.0586178	1.49164	1.0351	1.49807	2.09886	1.621	1.9497
ENSMUSG00000041417.15	Pik3r1	542.839	0.613766	0.204222	-3.00539	0.00265241	0.0586178	0.971421	0.291585	0.884345	1.45671	0.906412	1.58607
ENSMUSG00000019373.11	Cops3	1819.12	0.645361	0.214814	-3.00428	0.00266211	0.0586178	0.997817	0.984491	1.1062	2.06417	1.39176	1.62482
ENSMUSG00000044477.12	Zfand3	2264.11	-0.394758	0.131509	3.00175	0.00268431	0.0589387	-1.09762	-1.06752	-0.906336	-1.56003	-1.38151	-1.36178
ENSMUSG00000033808.16	Tmem87a	589.001	0.551291	0.183775	-2.99981	0.00270144	0.0591643	1.85545	1.37247	1.78764	2.56807	1.98998	2.16804
ENSMUSG00000022139.17	Mbnl2	3130.6	0.725355	0.242033	-2.99692	0.00272721	0.0595773	1.68295	1.1556	1.63029	2.62403	1.9389	2.1125
ENSMUSG00000024287.8	Thoc1	822.748	0.621316	0.207625	-2.99249	0.00276713	0.0602968	1.14436	1.17002	1.52775	2.42763	1.68154	1.6687
ENSMUSG00000027313.3	Chac1	343.05	-0.650611	0.217667	2.98902	0.00279877	0.0608328	-0.0458198	-0.308646	-0.360236	-0.879743	-0.899061	-1.01359
ENSMUSG00000026615.14	Eprs	8108.65	0.546258	0.182902	-2.98661	0.00282087	0.0611169	1.23593	0.585004	0.97889	1.61509	1.24257	1.51256
ENSMUSG00000022848.8	Slc49a4	649.683	-0.547205	0.183253	2.98606	0.00282601	0.0611169	-0.303679	0.309024	-0.0382458	-0.789158	-0.425797	-0.471164
ENSMUSG00000034163.10	Zfc3h1	529.811	0.744479	0.249803	-2.98026	0.00288004	0.0617692	2.16137	1.19287	1.82944	2.72405	2.22276	2.39852
ENSMUSG00000033004.16	Mycbp2	1282.02	0.608921	0.204353	-2.97975	0.00288481	0.0617692	1.53774	0.997059	1.46152	2.17054	1.60134	1.98854
ENSMUSG00000019948.4	Actr6	200.99	0.845061	0.28355	-2.98029	0.00287979	0.0617692	0.656084	1.1453	1.33897	2.69467	1.4594	1.64231
ENSMUSG00000037487.7	Ubr5	3137.01	0.573285	0.192251	-2.98196	0.0028641	0.0617692	1.36324	0.723354	1.13029	1.8179	1.33827	1.69517
ENSMUSG00000000552.10	Zfp385a	1413.57	-0.417704	0.140279	2.97767	0.00290446	0.0620361	-0.756309	-0.699892	-0.874339	-1.24358	-1.15439	-1.22166
ENSMUSG00000039756.12	Dnttip2	1592.62	0.698712	0.234792	-2.97588	0.00292152	0.0620932	0.833565	0.792432	1.12177	2.25653	1.23213	1.44857
ENSMUSG00000030029.14	Lrig1	803.422	-0.390645	0.131242	2.97651	0.00291546	0.0620932	0.567162	0.283923	0.592146	0.0188907	0.15596	0.0485074
ENSMUSG00000035173.14	Ccdc186	491.222	0.637053	0.21414	-2.97494	0.00293049	0.0621308	1.15502	0.811681	1.31425	2.09379	1.30597	1.86338
ENSMUSG00000066232.4	Ipo7	7532	0.763796	0.257155	-2.97018	0.00297623	0.0626388	1.97887	1.3626	1.88676	3.1071	2.19786	2.29355
ENSMUSG00000030761.16	Myo7a	472.599	0.64378	0.21665	-2.97152	0.00296328	0.0626388	0.189696	-0.742064	-0.698277	0.0370672	0.270335	0.318406
ENSMUSG00000039126.10	Prune2	388.836	0.611616	0.205876	-2.9708	0.00297023	0.0626388	2.60903	1.84187	2.1645	2.88542	2.58109	2.75908
ENSMUSG00000034480.18	Diaph2	586.787	0.719477	0.24247	-2.96728	0.00300449	0.0627846	1.62879	0.779741	1.44708	2.45484	1.66726	1.89684
ENSMUSG00000034903.18	Cobll1	1012.37	0.601294	0.202645	-2.96723	0.00300499	0.0627846	1.76267	1.08007	1.45602	2.14312	1.81603	2.01043
ENSMUSG00000025613.13	Cct8	11320.7	0.336787	0.113474	-2.96797	0.00299769	0.0627846	0.586304	0.573517	0.65758	1.08779	0.887672	0.825091
ENSMUSG00000025925.14	Terf1	326.939	0.598205	0.201673	-2.96622	0.00301489	0.0628393	1.25809	0.739047	1.08586	1.95389	1.45849	1.49839
ENSMUSG00000017485.11	Top2b	3150.07	0.722044	0.243716	-2.96265	0.00305004	0.0633944	1.6251	1.23755	1.68813	2.88247	1.81703	2.10435
ENSMUSG00000025980.14	Hspd1	7542.26	0.473987	0.160021	-2.96203	0.00305621	0.0633944	-1.7212	-1.83163	-1.60249	-0.985683	-1.32247	-1.42049
ENSMUSG00000031299.10	Pdha1	3905.59	0.291893	0.0985971	-2.96046	0.00307183	0.0634836	0.455774	0.380451	0.551422	0.856957	0.607863	0.764215
ENSMUSG00000031221.7	Igbp1	1032.44	0.443142	0.149704	-2.96012	0.00307523	0.0634836	0.0657973	0.182569	0.085029	0.648394	0.376722	0.6006
ENSMUSG00000021832.8	Psmc6	3503.35	0.88204	0.298276	-2.95713	0.00310518	0.063949	1.17283	1.10095	1.22814	2.94842	1.79314	1.66781
ENSMUSG00000034453.8	Polr3b	594.324	0.439068	0.148616	-2.95438	0.00313302	0.0643686	0.537961	0.24237	0.519607	0.963146	0.564931	0.988102
ENSMUSG00000024077.15	Strn	705.456	0.609546	0.206572	-2.95077	0.00316981	0.0645101	0.672798	0.133649	0.707538	1.34711	0.947814	1.07819
ENSMUSG00000069806.5	Cacng7	344.145	-0.741658	0.251181	2.95268	0.00315024	0.0645101	-2.87982	-2.76109	-3.03729	-3.47696	-3.71663	-3.94093
ENSMUSG00000040407.18	Akap9	1054.62	0.699994	0.237134	-2.95189	0.00315833	0.0645101	1.99005	1.25242	1.96703	2.81542	2.11017	2.35912
ENSMUSG00000004127.12	Trmt10a	421.276	0.511861	0.173456	-2.95096	0.00316789	0.0645101	0.29761	-0.210232	0.247491	0.776907	0.600796	0.523452
ENSMUSG00000030516.14	Tjp1	2646.3	0.554025	0.188008	-2.94681	0.00321067	0.0648825	2.15674	1.41035	1.81419	2.43672	2.02741	2.49902
ENSMUSG00000006932.17	Ctnnb1	15294.4	0.34108	0.115712	-2.94766	0.00320193	0.0648825	1.29221	1.2951	1.36239	1.78554	1.58494	1.57928
ENSMUSG00000052920.16	Prkg1	657.631	0.675566	0.229225	-2.94718	0.00320685	0.0648825	1.00704	0.607275	1.15887	2.075	1.09847	1.67082
ENSMUSG00000032468.11	Armc8	553.135	0.473878	0.160939	-2.94445	0.00323525	0.0652266	0.650533	0.33607	0.78237	1.19061	0.958757	1.0642
ENSMUSG00000056537.11	Rlim	2856.85	0.595442	0.202285	-2.94358	0.00324439	0.0652584	1.60786	1.07838	1.64307	2.37065	1.75328	2.0008
ENSMUSG00000022142.8	Nup155	2194.48	0.459254	0.156125	-2.94158	0.0032654	0.0653762	2.18085	1.66996	2.14191	2.53409	2.27889	2.48332
ENSMUSG00000004980.16	Hnrnpa2b1	9954.21	0.346402	0.117748	-2.94188	0.00326223	0.0653762	-0.170042	-0.388918	-0.256452	0.267366	-0.131116	0.0501989
ENSMUSG00000041426.12	Hibch	311.601	0.61614	0.209592	-2.93971	0.00328525	0.0656213	0.584968	0.901837	0.954233	1.9212	1.12473	1.32416
ENSMUSG00000002679.14	Med6	589.267	0.612727	0.208585	-2.93754	0.00330826	0.0659283	1.06065	0.654143	0.910773	1.82398	1.2881	1.40523
ENSMUSG00000030678.7	Maz	2133.21	-0.437383	0.149013	2.93519	0.00333341	0.0659724	-1.93638	-1.79885	-1.73489	-2.45004	-1.94252	-2.40406
ENSMUSG00000025898.6	Cwf19l2	285.868	0.760261	0.258924	-2.93623	0.00332227	0.0659724	1.55142	1.2748	1.64311	2.80971	1.72977	2.29219
ENSMUSG00000001986.16	Gria3	1291.95	0.450467	0.153451	-2.93557	0.00332931	0.0659724	2.11351	1.99005	2.19739	2.74286	2.22057	2.67609
ENSMUSG00000026556.15	Vangl2	225.061	-0.548418	0.186992	2.93284	0.00335881	0.0663231	0.420764	0.271354	0.63364	-0.205044	-0.0428707	-0.118521
ENSMUSG00000028799.15	Zfp362	432.971	-0.561841	0.191699	2.93084	0.00338043	0.0663927	-0.647233	-0.996564	-0.955585	-1.7022	-1.41318	-1.20783
ENSMUSG00000019927.6	Ube2d1	456.688	-0.469685	0.16032	2.92968	0.00339312	0.0663927	-0.231631	-0.717051	-0.283279	-0.890483	-0.858579	-0.934037
ENSMUSG00000022560.9	Slc52a2	317.025	-0.570907	0.194779	2.93105	0.00337822	0.0663927	-0.253445	-0.171214	-0.143192	-1.13992	-0.351782	-0.775245
ENSMUSG00000116564.1	Riok2	847.87	0.75975	0.259326	-2.92972	0.00339273	0.0663927	0.919223	0.961457	1.03722	2.503	1.36499	1.48006
ENSMUSG00000021901.10	Bap1	1086.54	-0.463654	0.158453	2.92614	0.00343202	0.0667002	-1.74767	-1.56414	-1.85866	-2.3477	-2.04586	-2.18875
ENSMUSG00000029128.12	Rab28	281.76	-0.598526	0.204493	2.92688	0.00342381	0.0667002	-1.404	-1.58358	-1.5023	-2.3077	-1.92138	-1.97537
ENSMUSG00000026637.13	Traf5	200.284	-0.661081	0.225886	2.92661	0.00342676	0.0667002	0.262476	0.0766359	0.0467985	-0.513538	-0.420539	-0.732573
ENSMUSG00000027799.12	Nbea	1411.21	0.660679	0.226232	-2.92036	0.00349627	0.0677963	1.92477	1.32237	1.79748	2.73476	2.04443	2.26128
ENSMUSG00000075702.9	Selenom	1689.12	-0.445795	0.152886	2.91586	0.00354715	0.0686286	-0.98957	-0.619694	-0.952803	-1.35435	-1.30159	-1.29398
ENSMUSG00000061559.15	Wdr61	1376.43	0.500912	0.171934	-2.91341	0.00357511	0.0690147	0.430755	0.794596	0.727275	1.42964	1.00783	1.02566
ENSMUSG00000007050.17	Lsm2	635.65	-0.394021	0.135351	2.9111	0.00360159	0.0693709	-0.171468	-0.200409	0.149452	-0.48517	-0.464454	-0.475256
ENSMUSG00000002320.15	Tm9sf1	1113.62	-0.391843	0.134652	2.91004	0.00361383	0.0694516	0.119984	0.0806432	0.388414	-0.175184	-0.158581	-0.297954
ENSMUSG00000057554.13	Lgals8	582.534	0.602364	0.207341	-2.90518	0.0036704	0.0695313	0.741724	0.39373	0.597609	1.489	0.885637	1.12879
ENSMUSG00000027115.14	Kif18a	252.584	0.867649	0.298545	-2.90626	0.00365774	0.0695313	1.82425	1.70067	2.10884	3.43699	2.26035	2.64262
ENSMUSG00000027227.7	Sord	239.171	-1.07955	0.3715	2.90593	0.00366166	0.0695313	-3.44536	-4.17065	-3.78944	-4.88172	-4.19394	-5.61494
ENSMUSG00000036916.13	Zfp280c	392.267	0.604852	0.208222	-2.90484	0.00367439	0.0695313	1.84305	1.11699	1.93138	2.47713	2.06788	2.17292
ENSMUSG00000060938.14	Rpl26	6649.24	0.505722	0.174044	-2.90571	0.00366415	0.0695313	-3.01242	-3.06478	-3.02687	-2.29262	-2.62001	-2.6758
ENSMUSG00000007036.15	Abhd16a	696.08	-0.442083	0.152065	2.90721	0.0036467	0.0695313	-0.875533	-0.420266	-0.631838	-1.16154	-1.02991	-1.08718
ENSMUSG00000043241.14	Upf2	668.444	0.671182	0.230902	-2.90678	0.00365171	0.0695313	1.36328	0.720772	1.46638	2.35154	1.48957	1.77945
ENSMUSG00000039840.8	Epg5	635.763	0.538929	0.185592	-2.90384	0.00368615	0.0696012	1.07361	0.534812	0.696622	1.33284	0.970485	1.57254
ENSMUSG00000026317.7	Cln8	506.32	-0.472309	0.162709	2.90278	0.00369866	0.069685	-1.08894	-0.876624	-0.628929	-1.33947	-1.36697	-1.36946
ENSMUSG00000006392.16	Med8	851.872	-0.374905	0.129382	2.89767	0.00375951	0.0699909	-0.274805	-0.261407	-0.138643	-0.525934	-0.750912	-0.630107
ENSMUSG00000026510.10	Trp53bp2	798.879	0.447952	0.154519	-2.899	0.00374353	0.0699909	1.12011	0.893869	0.92649	1.14689	1.48334	1.59434
ENSMUSG00000041645.14	Ddx24	3421.15	0.331852	0.114509	-2.89805	0.00375489	0.0699909	-0.0390832	-0.025643	-0.090802	0.193284	0.243858	0.36246
ENSMUSG00000020124.10	Usp15	1768.53	0.722868	0.249642	-2.89562	0.00378416	0.0699909	0.941672	0.678737	0.983212	2.2262	1.20596	1.46413
ENSMUSG00000005469.10	Prkaca	2420.21	-0.354221	0.122121	2.90059	0.00372465	0.0699909	-0.368005	-0.551621	-0.509889	-0.96567	-0.765088	-0.802701
ENSMUSG00000030138.8	Bms1	2000.67	0.401554	0.13859	-2.89741	0.00376254	0.0699909	0.686193	0.361412	0.548856	1.12609	0.77639	0.841129
ENSMUSG00000020074.7	Ccar1	1888.19	0.529377	0.182829	-2.89547	0.0037859	0.0699909	1.22256	0.92194	1.2817	2.08255	1.3914	1.56411
ENSMUSG00000039523.16	Cep104	580.033	-0.45803	0.158197	2.89531	0.0037879	0.0699909	-1.26938	-1.42124	-1.41807	-1.92772	-1.75145	-1.86766
ENSMUSG00000024491.16	Rbm27	883.502	0.512915	0.177142	-2.8955	0.00378556	0.0699909	1.40946	0.866818	1.28056	1.91184	1.53086	1.64855
ENSMUSG00000025255.18	Zfhx4	1100.51	0.688282	0.237891	-2.89326	0.00381264	0.0699985	2.22414	1.30226	1.99851	2.59082	2.10894	2.78323
ENSMUSG00000041453.12	Rpl21	2110.35	1.56047	0.5392	-2.89406	0.00380301	0.0699985	-9.50925	-10.6304	-8.97161	-8.54813	-6.66276	-9.00847
ENSMUSG00000041688.16	Amot	1700.86	0.570753	0.197233	-2.8938	0.00380609	0.0699985	1.15751	1.42262	1.3235	1.99559	1.78202	1.84358
ENSMUSG00000025531.14	Chm	569.347	0.957646	0.331628	-2.88771	0.00388053	0.0710936	1.34176	0.939187	1.66836	3.33452	1.84469	1.95737
ENSMUSG00000036768.6	Kif15	444.237	0.751263	0.260358	-2.8855	0.00390791	0.0711421	1.53436	0.878648	1.43112	2.496	1.65876	2.03684
ENSMUSG00000035891.16	Cerk	298.969	-0.542412	0.18793	2.88625	0.00389865	0.0711421	-0.935601	-1.00387	-0.954317	-1.4536	-1.62778	-1.61302
ENSMUSG00000009035.15	Tmem184b	2268.79	-0.28715	0.0995141	2.88552	0.00390763	0.0711421	-0.251592	-0.293264	-0.267292	-0.633969	-0.633042	-0.467707
ENSMUSG00000020801.8	Med31	271.237	0.595336	0.206506	-2.8829	0.00394035	0.0715816	1.22201	1.08247	1.30466	1.82392	1.94108	1.66755
ENSMUSG00000000374.8	Trappc10	687.387	-0.376145	0.130512	2.88208	0.00395058	0.0716167	-1.03263	-0.978928	-1.05035	-1.31707	-1.45492	-1.46919
ENSMUSG00000041360.8	Pum3	2237.55	0.57085	0.198267	-2.8792	0.00398691	0.0716424	0.436163	0.345425	0.336638	1.37754	0.727698	0.774521
ENSMUSG00000037890.13	Wdr19	227.861	0.539384	0.187238	-2.88074	0.00396744	0.0716424	0.686337	0.680071	0.661642	1.33854	1.1271	1.17627
ENSMUSG00000024981.6	Acsl5	909.369	-0.360056	0.125067	2.87891	0.00399053	0.0716424	-0.495144	-0.525366	-0.450261	-0.829974	-0.899294	-0.901201
ENSMUSG00000032594.11	Ip6k1	937.831	-0.409065	0.142021	2.8803	0.00397291	0.0716424	-0.898696	-0.885587	-0.853384	-1.30833	-1.27895	-1.33745
ENSMUSG00000030104.9	Edem1	1401.13	-0.390204	0.13555	2.87867	0.00399351	0.0716424	-0.412001	-0.292806	-0.266346	-0.637132	-0.769039	-0.759146
ENSMUSG00000022817.15	Itgb5	3104.11	-0.422287	0.146775	2.8771	0.00401349	0.0716958	-0.549367	-0.63357	-0.727618	-1.32731	-0.883507	-0.984819
ENSMUSG00000055204.15	Ankrd17	3861.31	0.520985	0.181119	-2.87648	0.00402141	0.0716958	1.61143	1.08055	1.52666	2.1	1.66248	1.95671
ENSMUSG00000037608.16	Bclaf1	2859.78	0.637632	0.221671	-2.87648	0.00402137	0.0716958	1.11578	0.772821	1.15035	2.17089	1.22412	1.59754
ENSMUSG00000028274.17	Rngtt	472.583	0.598633	0.208244	-2.87467	0.00404446	0.0719581	0.850401	0.601696	0.916742	1.86847	1.06326	1.30823
ENSMUSG00000020393.16	Kremen1	694.505	-0.429964	0.149733	2.87154	0.00408475	0.0723763	-1.14538	-1.29131	-1.3244	-1.7795	-1.75449	-1.57494
ENSMUSG00000020220.16	Vps13d	603.981	0.445498	0.155122	-2.87192	0.00407983	0.0723763	0.755957	0.317339	0.65	0.997841	1.01268	0.987023
ENSMUSG00000027770.5	Dhx36	1759.53	0.702505	0.244981	-2.8676	0.00413604	0.0729012	1.39719	1.37239	1.59747	2.80735	1.8967	1.92074
ENSMUSG00000031429.14	Psmd10	443.212	0.508165	0.1772	-2.86775	0.00413403	0.0729012	0.398213	0.413693	0.370982	0.975279	1.02213	0.707599
ENSMUSG00000022035.6	Ccdc25	350.834	0.56258	0.196249	-2.86667	0.00414816	0.0729012	0.359832	-0.00110213	0.414076	1.1564	0.466382	0.824186
ENSMUSG00000052151.12	Plpp2	785.788	-0.682457	0.238051	2.86685	0.00414581	0.0729012	-2.61683	-2.5384	-2.24663	-3.56619	-2.71894	-3.1658
ENSMUSG00000025899.14	Alkbh8	295.381	0.669007	0.233537	-2.86468	0.00417434	0.0732122	1.09486	0.692073	0.867111	2.13964	1.31806	1.32737
ENSMUSG00000038047.18	Haus6	530.145	0.656082	0.229149	-2.86312	0.00419492	0.0733406	0.799234	0.476413	1.03703	1.91389	1.19359	1.2966
ENSMUSG00000074909.5	Ranbp6	287.471	0.718877	0.251106	-2.86284	0.00419866	0.0733406	2.02313	1.7665	2.28987	3.45296	2.43318	2.6368
ENSMUSG00000029030.14	Tprgl	1030.15	-0.482976	0.168844	2.86048	0.00423003	0.0737392	-1.18073	-0.990094	-0.888943	-1.5041	-1.83401	-1.34901
ENSMUSG00000056749.7	Nfil3	739.852	-0.401701	0.140501	2.85905	0.0042491	0.0739224	0.233249	0.149069	0.363043	-0.264749	-0.0500515	-0.178546
ENSMUSG00000068882.13	Ssb	3280.34	0.719073	0.251945	-2.85409	0.00431601	0.0747905	1.17387	0.898819	1.38166	2.47897	1.50877	1.74226
ENSMUSG00000016382.15	Pls3	9370.11	0.761529	0.266822	-2.85407	0.00431634	0.0747905	0.6327	0.537238	0.671509	2.06322	1.13717	1.09935
ENSMUSG00000028893.8	Sesn2	1573.63	-0.37089	0.130091	2.85101	0.00435804	0.0753618	-0.566378	-0.606938	-0.589224	-0.909655	-0.871464	-1.14943
ENSMUSG00000047879.17	Usp14	3999.64	0.429423	0.150676	-2.84997	0.00437233	0.0754577	0.950889	0.862378	1.1811	1.67024	1.20143	1.40712
ENSMUSG00000036432.8	Siah2	249.49	-0.57415	0.2016	2.84797	0.00439994	0.0757826	-0.00195569	-0.603951	-0.0644524	-0.955141	-0.632369	-0.791007
ENSMUSG00000044533.15	Rps2	32044.5	-0.63781	0.22425	2.8442	0.00445236	0.0762528	-5.41012	-5.1438	-4.59958	-5.60974	-5.71117	-5.90551
ENSMUSG00000028402.18	Mpdz	1372.55	0.631599	0.222073	-2.8441	0.00445375	0.0762528	1.4169	0.842242	1.17421	2.23309	1.38263	1.71799
ENSMUSG00000022323.11	Rida	191.2	0.685582	0.241033	-2.84435	0.00445016	0.0762528	0.58099	0.679769	0.538029	1.58872	1.01579	1.28007
ENSMUSG00000038335.13	Tsr1	1798.55	0.474549	0.167128	-2.83944	0.00451922	0.0766257	1.1879	0.85167	1.17517	1.86703	1.45675	1.33265
ENSMUSG00000060227.15	Casc4	520.016	0.621296	0.218958	-2.83752	0.00454657	0.0766257	0.877778	0.4366	0.816792	1.66444	0.995276	1.41543
ENSMUSG00000022247.12	Brix1	1588.18	0.532154	0.187532	-2.83767	0.00454437	0.0766257	1.10523	0.853298	1.11467	1.91517	1.27083	1.50102
ENSMUSG00000029169.11	Dhx15	5104.29	0.623307	0.219561	-2.83887	0.00452731	0.0766257	1.29999	0.914169	1.17113	2.26373	1.46924	1.58493
ENSMUSG00000066877.11	Nck2	282.388	-0.525057	0.184834	2.8407	0.00450152	0.0766257	-0.975928	-0.647823	-0.788608	-1.54562	-1.25933	-1.14535
ENSMUSG00000015714.11	Cers2	2683.77	-0.327813	0.115459	2.83922	0.00452239	0.0766257	0.273692	0.262703	0.162672	-0.166108	-0.146448	-0.0306749
ENSMUSG00000000266.11	Mid2	205.022	0.710059	0.250173	-2.83827	0.00453587	0.0766257	1.04434	0.543818	1.08733	2.09332	1.20501	1.51705
ENSMUSG00000021242.9	Npc2	6315.81	-0.347642	0.122373	2.84083	0.00449963	0.0766257	-0.195483	0.0645653	-0.182634	-0.52141	-0.444942	-0.429314
ENSMUSG00000036580.15	Spg20	1241.07	0.302948	0.106834	-2.8357	0.0045726	0.0767827	0.427437	0.46639	0.664613	0.839037	0.739939	0.847564
ENSMUSG00000039929.14	Urb1	732.698	0.400141	0.141112	-2.83562	0.00457368	0.0767827	1.11877	0.969637	1.03065	1.20202	1.48709	1.55755
ENSMUSG00000034349.14	Smc4	2494.75	0.623622	0.220026	-2.83431	0.00459244	0.0769479	1.61666	0.985239	1.65151	2.43589	1.67177	2.05305
ENSMUSG00000061136.15	Prpf40a	2957.43	0.6267	0.221366	-2.83105	0.00463949	0.0775855	1.23998	0.844104	1.23645	2.2123	1.37171	1.64848
ENSMUSG00000031570.17	Plpp5	552.944	-0.446904	0.157914	2.83004	0.00465425	0.0776819	-0.355971	-0.751687	-0.738171	-1.05529	-0.925789	-1.19052
ENSMUSG00000020376.17	Rnf130	381.425	-0.481033	0.170199	2.8263	0.00470898	0.0784435	-0.084469	0.291326	0.471153	-0.24819	-0.327467	-0.22056
ENSMUSG00000026670.15	Uap1	1142.77	0.334766	0.118558	-2.82364	0.0047482	0.0789446	0.441208	0.159736	0.406494	0.724702	0.625316	0.633016
ENSMUSG00000024012.18	Mtch1	6588.83	-0.431641	0.153018	2.82085	0.00478966	0.0794808	-1.69725	-1.45882	-1.77735	-2.12746	-1.89268	-2.23338
ENSMUSG00000006010.14	Odr4	438.383	0.651522	0.231225	-2.8177	0.00483696	0.0796563	0.804306	0.568787	1.0267	1.85076	1.1949	1.43122
ENSMUSG00000021040.15	Slirp	954.697	0.502626	0.178274	-2.81941	0.00481122	0.0796563	3.33909	3.43353	3.69503	4.4083	3.79672	3.91185
ENSMUSG00000010045.2	Tmem115	1047.48	-0.439549	0.155983	2.81793	0.0048335	0.0796563	-0.710236	-0.476374	-0.855275	-1.20945	-1.06715	-1.09354
ENSMUSG00000035954.10	Dock4	368.143	0.718513	0.255001	-2.81768	0.00483717	0.0796563	1.47763	1.31109	1.22422	2.54966	1.90905	1.80702
ENSMUSG00000029048.3	Rer1	3104.55	-0.351899	0.125013	2.81491	0.00487916	0.0798904	-0.327903	-0.334213	-0.0413043	-0.612846	-0.649109	-0.545087
ENSMUSG00000025034.9	Trim8	842.113	-0.380696	0.1352	2.8158	0.00486552	0.0798904	0.0216397	-0.1765	0.214217	-0.520037	-0.390019	-0.213997
ENSMUSG00000031246.14	Sh3bgrl	3467.98	0.753062	0.267474	-2.81546	0.00487069	0.0798904	0.688117	0.606569	1.10441	2.13385	1.23502	1.39707
ENSMUSG00000003355.7	Fkbp11	681.833	-0.387743	0.137794	2.81392	0.00489406	0.0799723	0.962302	0.959036	0.949171	0.455556	0.690233	0.50623
ENSMUSG00000033396.13	Spg11	791.123	0.448217	0.159426	-2.81144	0.00493199	0.0799723	0.636629	0.12353	0.322186	0.751603	0.854712	0.77458
ENSMUSG00000062312.5	Erbb2	689.293	-0.465991	0.165773	2.81102	0.00493854	0.0799723	0.00217567	-0.248243	-0.125298	-0.693073	-0.703154	-0.471178
ENSMUSG00000001288.15	Rarg	1168.05	-0.421262	0.149852	2.81118	0.00493603	0.0799723	-1.16697	-1.34263	-1.46888	-1.8857	-1.62341	-1.76174
ENSMUSG00000052593.16	Adam17	696.814	0.543586	0.193299	-2.81216	0.00492107	0.0799723	1.45493	0.901121	1.46235	2.07103	1.44521	1.96873
ENSMUSG00000030602.13	Pak4	506.566	-0.444691	0.1582	2.81094	0.00493976	0.0799723	-1.43062	-1.24628	-1.19509	-1.77262	-1.57025	-1.86158
ENSMUSG00000049882.10	Vcpkmt	213.625	-0.68748	0.244784	2.80852	0.00497701	0.0804243	-1.80242	-1.62025	-1.46374	-2.704	-2.14865	-2.1208
ENSMUSG00000034647.15	Ankrd12	320.373	0.623962	0.222254	-2.80743	0.00499387	0.080546	1.08715	0.421036	1.17064	1.52442	1.22406	1.71751
ENSMUSG00000036391.16	Sec24a	1743.38	0.561595	0.20013	-2.80615	0.00501366	0.0805641	2.39378	1.61484	2.1732	2.60155	2.39566	2.75399
ENSMUSG00000060301.6	2610008E11Rik	339.282	0.722393	0.257389	-2.80661	0.00500653	0.0805641	0.825637	0.898388	1.32796	2.32059	1.32156	1.71758
ENSMUSG00000022100.14	Xpo7	1238.49	0.484636	0.172745	-2.8055	0.0050238	0.0805769	0.770947	0.31593	0.663715	1.28683	0.859102	1.04425
ENSMUSG00000032717.14	Mdfi	288.776	-0.71114	0.253746	2.80257	0.00506971	0.0808563	-2.00606	-1.26249	-1.74805	-2.49765	-2.05204	-2.44793
ENSMUSG00000021546.18	Hnrnpk	6864.42	0.441849	0.157724	-2.8014	0.00508807	0.0808563	-1.81515	-1.74761	-1.86166	-1.14067	-1.35342	-1.63767
ENSMUSG00000021929.9	Kpna3	2192.33	0.724572	0.258573	-2.8022	0.00507559	0.0808563	0.801	0.611658	1.00328	2.21074	1.20417	1.32979
ENSMUSG00000079555.2	Haus3	438.265	0.665857	0.237643	-2.80192	0.00507999	0.0808563	1.68732	1.10449	2.09383	2.68961	2.00522	2.30751
ENSMUSG00000019899.17	Lama2	1195.39	0.645133	0.230211	-2.80235	0.00507313	0.0808563	3.25712	2.94008	3.07115	3.73559	3.40642	4.03887
ENSMUSG00000001761.7	Smo	1412.8	-0.434147	0.155019	2.80061	0.00510061	0.0809066	-3.14328	-2.89155	-2.89257	-3.49774	-3.11411	-3.58762
ENSMUSG00000026049.11	Tex30	290.503	0.667043	0.238249	-2.79978	0.00511378	0.0809279	1.46177	1.26742	1.79763	2.72249	1.83052	2.07284
ENSMUSG00000042302.14	Ehbp1	394.723	0.567818	0.20284	-2.79934	0.00512071	0.0809279	0.82414	0.512111	0.61981	1.65478	0.865261	1.14891
ENSMUSG00000026021.15	Sumo1	578.957	0.786383	0.281021	-2.79831	0.0051371	0.0810384	-3.49673	-3.45027	-3.06656	-2.06504	-3.15078	-2.51689
ENSMUSG00000024826.15	Dpf2	1326.59	-0.358172	0.128133	2.79532	0.00518482	0.0811551	-0.659264	-0.410879	-0.615119	-0.987337	-0.812875	-0.991305
ENSMUSG00000033790.11	Tubgcp5	389.195	0.530866	0.189878	-2.79582	0.00517676	0.0811551	1.32857	1.21108	1.34352	2.2148	1.52846	1.8068
ENSMUSG00000024182.16	Axin1	940.027	-0.388189	0.138813	2.7965	0.00516601	0.0811551	-1.25151	-1.06936	-1.01777	-1.59469	-1.5887	-1.39795
ENSMUSG00000020205.8	Phlda1	1970.43	-0.47393	0.169507	2.79593	0.00517511	0.0811551	1.05774	1.27186	1.232	0.662434	0.702781	0.723266
ENSMUSG00000013033.16	Adgrl1	756.039	-0.591359	0.211592	2.7948	0.00519315	0.0811551	-0.843846	-1.01263	-1.04303	-2.00262	-1.33283	-1.33652
ENSMUSG00000029201.14	Ugdh	3626.72	0.333949	0.119535	-2.79373	0.00521033	0.0811551	0.814499	0.541868	0.695468	1.16498	0.855664	0.983469
ENSMUSG00000034593.16	Myo5a	1635.53	0.643884	0.230434	-2.79422	0.00520252	0.0811551	0.856469	0.247949	0.860868	1.76672	0.832355	1.30572
ENSMUSG00000034560.6	Washc4	1377.45	0.808099	0.289462	-2.79172	0.0052428	0.081221	1.90591	1.50951	2.08009	3.43268	2.28075	2.44399
ENSMUSG00000026775.9	Yme1l1	3124.06	0.734679	0.263156	-2.7918	0.00524156	0.081221	1.6799	1.41147	1.90785	3.15477	1.95208	2.23741
ENSMUSG00000033307.7	Mif	4799.62	-0.42262	0.151336	2.7926	0.00522868	0.081221	-3.46364	-3.40738	-3.74197	-4.02639	-3.90352	-3.9763
ENSMUSG00000049339.16	Retreg2	659.099	-0.424361	0.152072	2.79053	0.00526223	0.0813734	-1.15019	-1.09999	-1.07501	-1.67686	-1.43653	-1.48938
ENSMUSG00000040133.2	Gpr176	1912.58	-0.326957	0.117191	2.78996	0.0052715	0.0813734	0.013563	-0.289431	0.0438718	-0.520094	-0.362975	-0.366874
ENSMUSG00000030061.16	Uba3	1558.57	0.744019	0.26718	-2.78471	0.00535762	0.0818428	0.754686	0.660547	0.927232	2.21312	1.26911	1.2662
ENSMUSG00000027306.15	Nusap1	570.111	0.730658	0.262361	-2.78493	0.0053539	0.0818428	1.15326	0.782896	1.09837	2.34517	1.32445	1.65301
ENSMUSG00000024104.11	Washc2	1547.98	0.436694	0.156841	-2.78431	0.00536413	0.0818428	0.435966	0.718171	0.595104	1.17876	0.834844	1.02307
ENSMUSG00000031217.8	Efnb1	1287.78	-0.430423	0.154549	2.78502	0.00535245	0.0818428	-0.133662	-0.149311	0.0935667	-0.789008	-0.233179	-0.481614
ENSMUSG00000038039.13	Gcc2	498.478	0.688848	0.247426	-2.78406	0.0053683	0.0818428	1.92807	1.71091	2.10173	3.29781	2.10526	2.56385
ENSMUSG00000060475.13	Wtap	646.864	0.467676	0.167894	-2.78554	0.00534378	0.0818428	-0.44465	-0.714872	-0.249565	0.282062	-0.178914	-0.110565
ENSMUSG00000046152.16	Fut10	192.602	-0.602943	0.216442	2.7857	0.00534116	0.0818428	-1.01243	-0.513429	-0.961252	-1.50667	-1.47384	-1.29593
ENSMUSG00000026730.12	Pter	298.612	0.624353	0.224345	-2.783	0.00538593	0.081893	0.261176	0.0482921	0.504726	0.958445	0.699638	1.02251
ENSMUSG00000028757.4	Ddost	5884.89	-0.301819	0.108462	2.78272	0.00539057	0.081893	0.72698	0.714552	0.714422	0.387505	0.348507	0.474487
ENSMUSG00000020863.15	Luc7l3	987.818	0.489959	0.176198	-2.78073	0.00542369	0.0822514	1.18102	0.798679	0.917619	1.74168	1.20792	1.4306
ENSMUSG00000074102.4	Rbm15b	1071.69	-0.418261	0.150492	2.77928	0.00544796	0.0823923	-1.50297	-1.69992	-1.69376	-2.10967	-2.06374	-2.04051
ENSMUSG00000029422.15	Rsrc2	518.445	0.628899	0.226301	-2.77903	0.00545208	0.0823923	0.606378	0.0390267	0.518468	1.59016	0.712307	0.823108
ENSMUSG00000059355.13	Wdr83os	560.307	-0.539825	0.19435	2.77759	0.00547636	0.0826146	-1.1035	-0.843856	-0.968434	-1.55565	-1.30707	-1.72014
ENSMUSG00000033952.14	Aspm	650.004	0.909502	0.328231	-2.77092	0.00558982	0.0840323	2.90624	1.39453	2.41956	3.73114	2.70935	2.99346
ENSMUSG00000060147.15	Serpinb6a	5296.1	0.389076	0.140411	-2.77098	0.00558886	0.0840323	0.258388	0.350029	0.387085	0.897677	0.621601	0.621395
ENSMUSG00000001440.5	Kpnb1	15698.5	0.343968	0.124239	-2.76861	0.00562955	0.0843357	0.876052	0.447104	0.72182	1.01005	0.905302	1.10388
ENSMUSG00000036620.14	Mgat4b	1068.72	-0.56468	0.203919	2.76914	0.00562045	0.0843357	-2.05808	-1.96283	-2.26623	-2.78762	-2.58865	-2.60638
ENSMUSG00000001120.15	Pcbp3	293.118	-0.552366	0.199643	2.76678	0.00566135	0.0846652	-0.522966	-0.659152	-0.87358	-1.18755	-1.47936	-1.27268
ENSMUSG00000020952.10	Scfd1	1462.84	0.806104	0.291481	-2.76554	0.0056828	0.084839	1.21175	1.14324	1.34872	2.84592	1.56795	1.92919
ENSMUSG00000031513.8	Leprotl1	802.153	-0.412486	0.149348	2.76191	0.00574651	0.0848715	-0.161658	-0.458157	-0.335624	-0.564298	-0.875678	-0.826429
ENSMUSG00000006731.10	B4galnt1	291.365	-0.536765	0.194144	2.76477	0.00569623	0.0848715	-0.514424	-0.405165	-0.180331	-0.964101	-0.802106	-0.991992
ENSMUSG00000036188.4	Ankmy2	446.296	0.443393	0.160574	-2.76131	0.00575705	0.0848715	0.791374	0.699279	0.757654	1.16101	1.05144	1.29951
ENSMUSG00000056234.15	Ncoa4	337.964	0.610092	0.220713	-2.76419	0.00570651	0.0848715	-2.42393	-2.69601	-2.72347	-1.72704	-2.29122	-2.02586
ENSMUSG00000032014.6	Oaf	2291.81	-0.334976	0.121308	2.76135	0.00575621	0.0848715	-0.278476	-0.433608	-0.395728	-0.849497	-0.620392	-0.686913
ENSMUSG00000006931.15	P3h4	3286.41	-0.370684	0.134239	2.76138	0.00575578	0.0848715	-0.0286336	0.156442	0.182727	-0.398756	-0.123903	-0.315833
ENSMUSG00000031634.13	Ufsp2	761.533	0.528803	0.19153	-2.76093	0.00576367	0.0848715	0.609507	0.340792	0.707054	1.37992	1.02333	0.887536
ENSMUSG00000037966.15	Ninj1	804.297	-0.50095	0.181352	2.76232	0.0057393	0.0848715	-2.14992	-1.92013	-2.01979	-2.40862	-2.30472	-2.90968
ENSMUSG00000078532.9	Nkain1	554.292	-0.621488	0.225191	2.75982	0.00578328	0.0850152	-2.09663	-1.996	-1.95533	-2.92404	-2.3672	-2.62591
ENSMUSG00000057522.15	Spop	1092.5	0.382018	0.138484	-2.75857	0.00580556	0.0851976	-1.73028	-1.98867	-1.91027	-1.43372	-1.4766	-1.56821
ENSMUSG00000005575.16	Ube2m	3626.13	-0.346993	0.12586	2.75698	0.00583372	0.0854654	-0.938458	-0.898322	-0.945887	-1.25157	-1.1697	-1.44155
ENSMUSG00000027082.15	Tfpi	932.933	0.516814	0.187518	-2.75608	0.00584994	0.0855579	0.978149	1.09517	1.18944	1.98138	1.26679	1.59613
ENSMUSG00000017119.19	Nbr1	1557.51	0.332388	0.12083	-2.75087	0.00594379	0.0856382	0.474717	0.400375	0.534864	0.827025	0.607102	0.934951
ENSMUSG00000027346.15	Gpcpd1	207.611	0.617111	0.224361	-2.75052	0.00595002	0.0856382	1.04039	0.646732	1.15348	1.8998	1.23163	1.61442
ENSMUSG00000009535.13	Rnmt	792.997	0.434427	0.157955	-2.75031	0.00595384	0.0856382	0.660525	0.591841	0.820728	1.36115	0.931117	1.09511
ENSMUSG00000014504.16	Srp19	584.222	0.537124	0.195245	-2.75103	0.00594086	0.0856382	-0.413789	-0.784602	-0.478427	0.245472	-0.163591	-0.104045
ENSMUSG00000027035.10	Cers6	1842.73	0.499243	0.181459	-2.75128	0.00593635	0.0856382	2.08787	1.38067	2.0226	2.30264	2.0668	2.53436
ENSMUSG00000044813.15	Shb	402.79	-0.465162	0.169133	2.75027	0.00595468	0.0856382	-0.63734	-0.388745	-0.531741	-0.937699	-1.13049	-0.976655
ENSMUSG00000033628.15	Pik3c3	473.671	0.365248	0.132761	-2.75117	0.00593827	0.0856382	0.401088	0.341868	0.451093	0.829522	0.621326	0.784595
ENSMUSG00000090112.8	Shprh	597.983	0.676567	0.245722	-2.75338	0.00589836	0.0856382	2.27734	1.58566	2.2797	3.1412	2.30821	2.76997
ENSMUSG00000050891.10	Tatdn1	254.031	0.621641	0.225992	-2.75072	0.00594652	0.0856382	0.598904	0.574128	0.806801	1.73892	0.765214	1.23046
ENSMUSG00000048000.15	Gigyf2	1262.28	0.366688	0.133145	-2.75406	0.00588615	0.0856382	0.932404	0.568051	0.735324	1.17688	0.920261	1.1915
ENSMUSG00000033306.15	Lpp	11359.5	0.644965	0.234663	-2.74848	0.00598728	0.0859637	1.89528	1.26345	1.6459	2.54926	1.83974	2.29161
ENSMUSG00000000127.15	Fer	856.467	0.508186	0.185065	-2.74598	0.00603297	0.0863325	0.799622	0.395473	0.760194	1.5774	0.909492	1.02194
ENSMUSG00000036459.15	Wtip	791.571	-0.587311	0.213842	2.74647	0.00602413	0.0863325	-2.70826	-2.5454	-2.98706	-3.29378	-2.98005	-3.6509
ENSMUSG00000058709.11	Egln2	1094.92	-0.483935	0.176288	2.74513	0.00604863	0.0864132	-2.70591	-2.71085	-2.82386	-3.27908	-3.39673	-3.16218
ENSMUSG00000022141.7	Nipbl	1226.86	0.688987	0.251063	-2.74428	0.00606443	0.0864919	1.80838	1.03094	1.77003	2.66718	1.76582	2.24357
ENSMUSG00000024079.4	Eif2ak2	552.582	0.752878	0.274398	-2.74375	0.00607418	0.0864919	1.05983	0.633164	0.861095	2.16873	1.27967	1.4857
ENSMUSG00000073176.4	Zfp449	245.851	0.644609	0.235028	-2.74269	0.00609381	0.0866284	1.32979	1.40771	1.66197	2.7227	1.62827	2.1053
ENSMUSG00000022723.16	Crybg3	540.85	0.685403	0.251032	-2.73034	0.00632694	0.0872127	1.24452	0.944673	1.43893	2.35062	1.54294	1.82847
ENSMUSG00000038150.7	Ormdl3	623.927	-0.461505	0.168584	2.73753	0.00619018	0.0872127	-1.72944	-1.49111	-1.45483	-2.12895	-1.95884	-2.02344
ENSMUSG00000031954.6	Cfdp1	1567.17	0.537439	0.19642	-2.73617	0.00621583	0.0872127	-0.220595	-0.40804	-0.125734	0.588751	0.317198	-0.00635292
ENSMUSG00000038379.15	Ttk	427.716	0.679515	0.248405	-2.73552	0.00622827	0.0872127	1.46084	0.986015	1.56764	2.48254	1.78932	1.89415
ENSMUSG00000025351.14	Cd63	8734.58	-0.32085	0.117258	2.73627	0.00621409	0.0872127	-1.14404	-0.926902	-1.11546	-1.42253	-1.35617	-1.41562
ENSMUSG00000032560.14	Dnajc13	2412.41	0.597757	0.218446	-2.7364	0.00621148	0.0872127	1.07848	0.45962	1.02818	1.82838	1.2048	1.32717
ENSMUSG00000019777.16	Hdac2	3004.02	0.51265	0.187352	-2.73629	0.00621361	0.0872127	0.724273	0.69365	0.90064	1.65378	1.04035	1.18968
ENSMUSG00000026779.6	Mastl	441.411	0.615076	0.225178	-2.7315	0.00630459	0.0872127	1.59523	1.23348	1.96854	2.70605	1.96485	2.02617
ENSMUSG00000031157.10	Pqbp1	1057.52	-0.398957	0.145707	2.73808	0.00617997	0.0872127	-0.746523	-0.81826	-0.969935	-1.33535	-1.25116	-1.22402
ENSMUSG00000050541.14	Adra1b	217.247	-0.712509	0.260307	2.73719	0.00619668	0.0872127	-1.17331	-0.854681	-0.915676	-1.80479	-1.43494	-1.81623
ENSMUSG00000028309.14	Rnf20	1470.55	0.37876	0.138599	-2.73277	0.00628032	0.0872127	0.754757	0.415769	0.666412	1.19545	0.819565	0.947879
ENSMUSG00000053754.14	Chd8	1850.99	0.447435	0.163539	-2.73596	0.00621984	0.0872127	1.44053	0.896649	1.17582	1.64563	1.42071	1.69031
ENSMUSG00000026974.11	Zmynd19	499.313	-0.479574	0.175419	2.73387	0.00625947	0.0872127	-1.82326	-1.90682	-1.96713	-2.37305	-2.46901	-2.3947
ENSMUSG00000033917.15	Gde1	877.608	-0.489939	0.179222	2.7337	0.00626276	0.0872127	-1.04702	-0.85208	-0.289573	-1.21382	-1.13005	-1.33272
ENSMUSG00000053334.6	Ficd	205.716	-0.65427	0.239538	2.73139	0.00630682	0.0872127	-0.289098	0.473859	0.406275	-0.41773	-0.726963	-0.324932
ENSMUSG00000020152.7	Actr2	4371.99	0.615663	0.225325	-2.73234	0.00628867	0.0872127	0.426939	0.26144	0.503341	1.54397	0.822284	0.760778
ENSMUSG00000029328.15	Hnrnpdl	1425.89	0.410606	0.150289	-2.73211	0.00629297	0.0872127	-0.721557	-0.962689	-0.534145	-0.106238	-0.461662	-0.424227
ENSMUSG00000018189.12	Uchl5	886.775	0.551584	0.201804	-2.73326	0.00627111	0.0872127	1.16738	0.950476	1.25957	1.93042	1.42925	1.70218
ENSMUSG00000015880.13	Ncapg	1074.54	0.62958	0.230548	-2.7308	0.00631806	0.0872127	1.94478	1.53339	2.01411	2.89731	2.13637	2.43086
ENSMUSG00000020392.8	Cdkn2aipnl	467.643	-0.564286	0.206998	2.72605	0.00640973	0.088213	-1.79462	-1.82708	-2.03672	-2.08608	-2.7964	-2.7208
ENSMUSG00000062232.14	Rapgef2	616.262	0.500457	0.183661	-2.72489	0.00643222	0.0883816	1.41448	0.72415	1.17443	1.69402	1.4967	1.57481
ENSMUSG00000020516.15	Rps6kb1	749.462	0.470175	0.17266	-2.72313	0.00646662	0.0887129	-0.162483	-0.415752	-0.131218	0.458911	-0.0282707	0.263447
ENSMUSG00000020719.14	Ddx5	7478.98	0.484285	0.177985	-2.72092	0.00650998	0.0888882	-0.220761	-0.577005	-0.0602797	0.44992	0.00053929	0.15611
ENSMUSG00000013698.12	Pea15a	4730.39	-0.348588	0.128114	2.72091	0.00651029	0.0888882	-1.92485	-1.95124	-1.84136	-2.4014	-2.2396	-2.16975
ENSMUSG00000036751.7	Cox6b1	3813.15	-0.371883	0.136636	2.7217	0.00649467	0.0888882	-0.101368	0.101061	-0.225809	-0.321848	-0.538265	-0.551433
ENSMUSG00000029687.16	Ezh2	993.201	0.412843	0.151766	-2.72026	0.00652315	0.088923	0.369201	0.33923	0.558111	1.01719	0.613169	0.860001
ENSMUSG00000021737.4	Psmd6	3828.01	0.402886	0.148152	-2.7194	0.00654002	0.0890124	0.858066	0.874663	1.10985	1.4876	1.35779	1.19556
ENSMUSG00000034653.11	Ythdc2	388.597	0.730291	0.268619	-2.71868	0.00655424	0.0890655	2.13233	1.56804	2.34468	3.30755	2.54349	2.60153
ENSMUSG00000016128.14	Stard13	552.073	0.458862	0.168889	-2.71695	0.00658859	0.0892511	0.961693	0.592702	0.866438	1.08374	1.23896	1.40544
ENSMUSG00000000901.17	Mmp11	419.366	-0.453719	0.166974	2.71731	0.00658157	0.0892511	0.116906	0.166533	0.229155	-0.276427	-0.223405	-0.422792
ENSMUSG00000029920.9	Smarcad1	995.825	0.606266	0.223353	-2.71438	0.00663991	0.0898053	1.74851	1.49597	1.93284	2.88163	1.97943	2.23813
ENSMUSG00000041959.14	S100a10	10281.2	0.412735	0.152121	-2.71321	0.00666345	0.0899826	0.20023	0.32466	0.256583	0.783494	0.538302	0.655435
ENSMUSG00000028228.5	Cpne3	1227.78	0.597536	0.220316	-2.71218	0.00668426	0.0901226	1.01519	0.605733	1.0323	1.8638	1.28738	1.33947
ENSMUSG00000032046.15	Abhd12	1098.28	-0.496572	0.183178	2.71087	0.00671074	0.0902096	-0.576993	-0.143777	-0.407043	-1.08271	-0.667758	-0.901032
ENSMUSG00000008976.16	Gabpa	1037.92	0.675577	0.249214	-2.71082	0.00671162	0.0902096	1.26152	0.803588	1.23477	2.39001	1.45596	1.60234
ENSMUSG00000063884.6	Ptcd3	1374.53	0.519122	0.191618	-2.70915	0.00674566	0.0905261	0.766951	0.574708	0.928148	1.71453	1.11402	1.05422
ENSMUSG00000031770.16	Herpud1	1437.78	-0.342015	0.126357	2.70674	0.00679473	0.090753	0.687738	0.600188	0.678535	0.19802	0.282719	0.403618
ENSMUSG00000031823.14	Zdhhc7	440.816	-0.597372	0.220686	2.70689	0.00679167	0.090753	-2.86663	-2.77852	-2.87423	-3.42474	-3.64986	-3.45219
ENSMUSG00000053870.7	Fpgt	394.974	0.68573	0.253589	-2.7041	0.00684893	0.090753	1.52979	1.15257	1.77652	2.72554	1.90564	2.07591
ENSMUSG00000025525.12	Apool	396.296	0.515776	0.190733	-2.70418	0.00684729	0.090753	0.891783	0.789738	1.11151	1.83306	1.24067	1.3364
ENSMUSG00000031099.16	Smarca1	203.144	0.934111	0.345349	-2.70483	0.00683384	0.090753	1.62499	1.25861	1.69758	3.39367	1.76278	2.46946
ENSMUSG00000020063.16	Sirt1	362.377	0.778144	0.287623	-2.70543	0.00682167	0.090753	1.69334	0.945633	1.92893	3.02407	1.92358	2.10627
ENSMUSG00000022201.16	Zfr	3310.02	0.542252	0.200559	-2.7037	0.00685722	0.090753	1.7569	1.20685	1.584	2.36777	1.76184	2.02642
ENSMUSG00000069833.13	Ahnak	46672.7	0.491842	0.181737	-2.70633	0.00680306	0.090753	2.29264	1.88265	2.28159	2.7437	2.51365	2.58282
ENSMUSG00000020978.10	Klhdc2	1730.5	-0.35796	0.132279	2.70611	0.00680766	0.090753	0.0281431	0.00584511	0.287024	-0.236733	-0.358828	-0.203487
ENSMUSG00000029705.17	Cux1	2053.43	0.388668	0.143782	-2.70318	0.00686792	0.0907554	0.200618	-0.0977146	-0.0559116	0.364761	0.318164	0.482793
ENSMUSG00000040760.11	Appl1	934.406	0.681921	0.252323	-2.70258	0.00688046	0.0907821	1.40828	0.868648	1.3419	2.54516	1.5793	1.68473
ENSMUSG00000005370.4	Msh6	1548.98	0.315247	0.116753	-2.70012	0.00693144	0.0909014	1.03802	0.696385	0.936371	1.22932	1.13115	1.18724
ENSMUSG00000042489.15	Clspn	486.362	0.461312	0.170849	-2.70011	0.00693164	0.0909014	0.824876	0.553139	0.618418	1.31115	1.05422	0.929747
ENSMUSG00000007458.14	M6pr	1631.66	-0.347648	0.128705	2.70112	0.00691067	0.0909014	-1.68812	-1.63976	-1.55879	-2.07846	-2.16932	-1.77184
ENSMUSG00000021188.14	Trip11	1331.82	0.640017	0.236959	-2.70096	0.00691403	0.0909014	2.14631	1.66165	2.41201	3.18008	2.36222	2.68957
ENSMUSG00000034620.17	Rxylt1	1058.45	-0.481189	0.178252	2.69949	0.00694455	0.0909326	-0.569039	-0.274839	-0.138202	-0.678037	-1.01207	-0.798403
ENSMUSG00000073664.11	Nbeal1	803.764	0.748601	0.27752	-2.69747	0.00698692	0.0913487	2.19908	1.71219	2.34436	3.33284	2.35578	2.86979
ENSMUSG00000021686.6	Ap3b1	2429	0.293309	0.108769	-2.69663	0.00700448	0.0914398	0.374603	0.241767	0.379625	0.702559	0.477692	0.647234
ENSMUSG00000038459.10	Abhd17c	423.401	-0.410252	0.152308	2.69357	0.00706906	0.0921084	-0.0794924	-0.186651	0.0473247	-0.638648	-0.536906	-0.334252
ENSMUSG00000036822.6	Topors	1349.75	0.443825	0.164795	-2.6932	0.00707705	0.0921084	1.72013	1.25987	1.59767	2.17678	1.62656	2.08399
ENSMUSG00000024190.7	Dusp1	1778.02	-0.512566	0.190408	2.69193	0.00710402	0.0923202	0.634809	1.18612	1.13231	0.657368	0.389159	0.321946
ENSMUSG00000022016.16	Akap11	1362.13	0.667128	0.248053	-2.68946	0.00715682	0.0928664	1.78619	1.56553	2.02749	3.01057	2.0297	2.45512
ENSMUSG00000044018.3	Mrpl50	663.395	0.514838	0.191519	-2.68818	0.00718429	0.093083	0.649493	0.763169	0.590981	1.65004	0.901033	1.00498
ENSMUSG00000036206.12	Sh3bp4	1685.51	-0.3602	0.134023	2.68759	0.00719694	0.0931071	-0.0217233	0.0883595	-0.0487852	-0.472133	-0.212585	-0.411622
ENSMUSG00000030987.5	Stim1	604.085	-0.464611	0.172977	2.68598	0.00723182	0.0934183	-0.241469	-0.012646	-0.2367	-0.671486	-0.48519	-0.743861
ENSMUSG00000058569.8	Tmed9	4005.9	-0.321855	0.120215	2.67733	0.00742118	0.0947466	0.41979	0.38959	0.277353	0.0402431	0.0139526	0.0167779
ENSMUSG00000079184.10	Mphosph8	811.062	0.479413	0.179068	-2.67727	0.00742249	0.0947466	0.758955	0.884043	1.03123	1.54969	0.935722	1.57287
ENSMUSG00000028576.12	Ift74	422.21	0.610139	0.227735	-2.67916	0.00738077	0.0947466	1.48137	1.11591	1.54032	2.32815	1.73557	1.99155
ENSMUSG00000021115.15	Vrk1	611.078	0.438904	0.163913	-2.67767	0.00741368	0.0947466	0.659891	0.465861	0.786736	1.20227	0.809684	1.18108
ENSMUSG00000040025.17	Ythdf2	1436.09	0.39203	0.146319	-2.67929	0.00737793	0.0947466	0.532346	0.386518	0.784687	1.08467	0.906317	0.883593
ENSMUSG00000033166.11	Dis3	1376.9	0.549729	0.205168	-2.67941	0.00737521	0.0947466	1.09941	0.657575	0.943419	1.80889	1.22077	1.31834
ENSMUSG00000050288.6	Fzd2	2287.76	-0.429303	0.160264	2.67873	0.00739021	0.0947466	0.77561	0.712661	1.02377	0.28213	0.48224	0.414221
ENSMUSG00000037089.11	Slc35b2	1463.9	-0.45368	0.169355	2.67887	0.00738717	0.0947466	-1.07844	-0.796774	-1.17403	-1.54979	-1.22283	-1.65708
ENSMUSG00000027533.10	Fabp5	1405.88	-0.551103	0.205994	2.67534	0.00746544	0.095154	-2.09401	-1.89507	-2.33931	-2.37933	-3.10442	-2.74321
ENSMUSG00000058355.8	Abce1	3636.28	0.797992	0.298582	-2.6726	0.00752656	0.0957916	0.533955	0.138752	0.635846	2.09953	0.859745	0.98422
ENSMUSG00000034361.10	Cpne2	586.461	-0.390777	0.146251	2.67195	0.0075411	0.0958231	0.0427398	-0.00537551	-0.0821657	-0.452387	-0.420005	-0.399443
ENSMUSG00000021403.3	Serpinb9b	1409.59	0.708234	0.265107	-2.6715	0.00755125	0.0958231	0.546754	1.55741	1.2347	2.13993	1.81902	1.58439
ENSMUSG00000075419.4	Dolk	663.641	-0.393322	0.147263	2.67088	0.00756522	0.0958312	0.417434	0.639802	0.615597	0.135475	0.0719327	0.18917
ENSMUSG00000032410.13	Xrn1	757.136	0.669611	0.250871	-2.66915	0.0076044	0.0958312	1.73971	1.22098	1.85318	2.7899	1.81309	2.25298
ENSMUSG00000032216.15	Nedd4	29484.1	0.43578	0.16321	-2.67005	0.0075839	0.0958312	0.562705	0.121901	0.459084	1.09488	0.539016	0.783136
ENSMUSG00000023353.14	Agap3	873.908	-0.397945	0.149093	2.6691	0.00760558	0.0958312	-1.3557	-1.2377	-1.48083	-1.95209	-1.62352	-1.69871
ENSMUSG00000020315.18	Sptbn1	14589.6	0.525864	0.197036	-2.66888	0.00761055	0.0958312	1.20303	0.808396	0.920263	1.56815	1.26608	1.59732
ENSMUSG00000013736.16	Trnt1	752.899	0.67752	0.253893	-2.66852	0.00761852	0.0958312	1.1678	0.73149	1.13755	2.34716	1.39345	1.48447
ENSMUSG00000041303.7	Gtf3c3	697.532	0.556917	0.208814	-2.66705	0.00765212	0.0958347	0.583133	0.586522	1.02501	1.49422	1.09428	1.33695
ENSMUSG00000033792.12	Atp7a	723.572	0.602263	0.225774	-2.66755	0.00764061	0.0958347	2.86088	2.50367	3.19723	3.74038	3.07776	3.64418
ENSMUSG00000003380.11	Rabac1	1903.33	-0.486747	0.182503	2.66706	0.0076518	0.0958347	-0.357799	-0.0108235	-0.0753612	-0.714605	-0.504485	-0.726315
ENSMUSG00000029175.17	Slc35f6	940.238	-0.349812	0.131257	2.6651	0.00769653	0.0962024	0.263265	0.443811	0.422819	-0.108985	0.111415	0.0564148
ENSMUSG00000028790.13	Khdrbs1	5008.82	0.303986	0.114075	-2.66478	0.00770377	0.0962024	0.688079	0.494897	0.710418	1.06032	0.869555	0.846075
ENSMUSG00000079487.11	Med12	1339.91	0.413281	0.155151	-2.66374	0.00772775	0.0963624	1.2951	0.904021	1.03081	1.46008	1.40862	1.50956
ENSMUSG00000063108.15	Zfp26	321.17	0.714579	0.268409	-2.66228	0.00776134	0.0966416	2.13014	1.15516	1.80386	2.81532	1.98972	2.37467
ENSMUSG00000000184.12	Ccnd2	17575.8	0.298459	0.112191	-2.66028	0.00780751	0.096806	-0.334361	-0.437165	-0.380667	0.0734724	-0.230608	-0.127709
ENSMUSG00000041697.8	Cox6a1	3867.34	-0.349799	0.131481	2.66045	0.00780354	0.096806	-0.505993	-0.288023	-0.504452	-0.759102	-0.710331	-0.917768
ENSMUSG00000052557.11	Gan	322.205	0.528156	0.198572	-2.65977	0.00781942	0.096806	0.200525	-0.226641	0.02677	0.338738	0.276438	0.893539
ENSMUSG00000031545.6	Gpat4	1954.29	-0.431401	0.162189	2.65987	0.00781702	0.096806	-1.8531	-1.95126	-1.64558	-2.47365	-2.23615	-2.05943
ENSMUSG00000063362.13	Alg11	375.9	0.53277	0.200402	-2.6585	0.00784892	0.097032	1.22882	0.986066	1.1563	2.14268	1.3922	1.52423
ENSMUSG00000015846.15	Rxra	1002.51	-0.426338	0.160455	2.65706	0.0078826	0.0971396	-1.84722	-1.91743	-2.13796	-2.48819	-2.38629	-2.3707
ENSMUSG00000029364.15	Wsb2	2834.52	-0.489302	0.184135	2.65731	0.00787681	0.0971396	-3.45722	-3.0872	-3.50563	-3.75178	-3.58492	-4.18604
ENSMUSG00000071649.6	B3gat3	599.667	-0.480042	0.180692	2.65668	0.0078914	0.0971396	-1.51962	-1.28922	-1.47783	-1.80997	-2.11419	-1.95806
ENSMUSG00000063334.16	Krr1	530.592	0.771973	0.290943	-2.65334	0.00796988	0.0974109	0.69651	0.287472	0.677649	2.12143	0.885221	1.12271
ENSMUSG00000029090.12	Adgra3	844.749	-0.395238	0.148918	2.65407	0.00795273	0.0974109	-0.790693	-0.856143	-0.902743	-1.31814	-1.26901	-1.16716
ENSMUSG00000002083.13	Bbc3	281.336	-0.630313	0.237553	2.65335	0.00796965	0.0974109	-0.47675	-0.719139	-0.605531	-1.28669	-1.17269	-1.21024
ENSMUSG00000025917.9	Cops5	2103.71	0.369083	0.139046	-2.65439	0.00794514	0.0974109	0.126741	0.30148	0.316714	0.823624	0.552191	0.461064
ENSMUSG00000059070.16	Rpl18	15030.5	-0.590054	0.222221	2.65526	0.00792478	0.0974109	-5.31075	-5.15568	-5.41009	-5.66778	-5.58356	-6.54347
ENSMUSG00000002504.15	Slc9a3r2	1183.48	-0.400743	0.151068	2.65273	0.00798429	0.0974489	-0.959274	-0.779611	-0.911803	-1.31194	-1.04077	-1.53054
ENSMUSG00000015757.10	Ppil4	364.192	0.583595	0.220203	-2.65026	0.00804301	0.098027	0.936628	0.693175	0.901427	1.90752	1.14797	1.3505
ENSMUSG00000050627.13	Gpd1l	387.665	-0.505832	0.191025	2.64798	0.00809732	0.0981345	-0.967862	-0.408353	-0.617826	-1.08108	-1.06806	-1.40852
ENSMUSG00000020720.13	Psmd12	3251.19	0.382704	0.144488	-2.64869	0.00808043	0.0981345	0.389557	0.521898	0.563387	1.0249	0.707018	0.853335
ENSMUSG00000045962.16	Wnk1	6470.59	0.475564	0.17958	-2.6482	0.00809228	0.0981345	0.847794	0.376331	0.728403	1.24618	0.81078	1.25928
ENSMUSG00000035900.18	Gramd4	450.355	-0.436236	0.164659	2.64933	0.00806522	0.0981345	-0.867484	-0.83143	-0.762688	-1.36779	-1.22962	-1.22045
ENSMUSG00000054277.8	Arfgap3	1340.78	-0.328467	0.124106	2.64668	0.00812874	0.0983771	-0.308777	-0.101054	-0.0707792	-0.490428	-0.542214	-0.502059
ENSMUSG00000032966.14	Fkbp1a	10462.3	-0.307251	0.116224	2.6436	0.00820292	0.0984804	-1.32362	-1.25782	-1.30837	-1.63581	-1.58832	-1.62513
ENSMUSG00000022863.15	Btg3	480.17	1.11659	0.422262	-2.6443	0.00818589	0.0984804	-6.50773	-6.1569	-6.95788	-5.25579	-4.61254	-6.12507
ENSMUSG00000027520.15	Zdbf2	787.187	0.620552	0.234791	-2.643	0.00821746	0.0984804	2.38919	1.66988	2.54122	3.20222	2.53966	2.70072
ENSMUSG00000028577.13	Plaa	2410.84	0.633023	0.239533	-2.64274	0.00822377	0.0984804	0.943463	0.907231	1.21798	2.18648	1.36995	1.51578
ENSMUSG00000031392.18	Irak1	898.895	-0.43493	0.164535	2.64338	0.00820826	0.0984804	-2.66941	-2.53515	-2.50214	-3.2442	-2.86003	-2.91144
ENSMUSG00000030759.16	Far1	2151.64	0.690888	0.261249	-2.64455	0.00817987	0.0984804	2.06042	1.65616	2.13722	3.35388	2.35469	2.37083
ENSMUSG00000040722.7	Scamp5	350.784	-0.576953	0.218131	2.64498	0.0081695	0.0984804	-1.4387	-1.06847	-1.56022	-1.95371	-1.83399	-1.96163
ENSMUSG00000024878.9	Cbwd1	348.551	0.627411	0.237427	-2.64254	0.00822857	0.0984804	0.794177	0.382795	0.815724	1.72098	1.12887	1.15534
ENSMUSG00000022241.6	Tars	4889.4	0.397956	0.150677	-2.64112	0.00826318	0.0985631	0.811932	0.370321	0.421281	1.02157	0.753797	0.938668
ENSMUSG00000050148.9	Ubqln2	4049.24	0.347556	0.131846	-2.63607	0.00838715	0.0985631	1.88686	1.78796	1.8062	2.10421	2.12135	2.25746
ENSMUSG00000033983.14	Coil	252.788	-0.494499	0.187458	2.63792	0.00834157	0.0985631	-0.0230633	0.227482	0.0137971	-0.427776	-0.445223	-0.507634
ENSMUSG00000017550.14	Atad5	229.24	0.66729	0.252919	-2.63835	0.00833099	0.0985631	1.91166	1.06962	1.95671	2.63555	1.94664	2.39451
ENSMUSG00000024083.16	Pja2	3191.75	0.490317	0.186043	-2.6355	0.00840132	0.0985631	1.14035	1.07247	1.25126	2.07048	1.37582	1.52956
ENSMUSG00000030213.12	Atf7ip	1888.44	0.354865	0.134415	-2.64007	0.00828879	0.0985631	1.45025	0.963727	1.2602	1.49654	1.52509	1.64166
ENSMUSG00000020519.5	Sap30l	217.802	-0.632568	0.24008	2.63482	0.00841824	0.0985631	-1.4875	-1.68264	-0.875938	-1.945	-1.82105	-2.18359
ENSMUSG00000027531.16	Impa1	1004.1	0.468732	0.177545	-2.64007	0.0082889	0.0985631	0.640657	0.540004	0.819481	1.37122	0.96793	1.09518
ENSMUSG00000021709.14	Erbin	1529.54	0.699974	0.265444	-2.63699	0.00836444	0.0985631	1.56464	0.990124	1.72368	2.75635	1.63706	2.08589
ENSMUSG00000044857.8	Lemd2	1001.31	-0.529963	0.200763	2.63975	0.00829672	0.0985631	-0.839555	-0.459406	-1.0422	-1.37292	-0.996773	-1.53773
ENSMUSG00000070923.4	Klhl9	2803.7	0.431143	0.16339	-2.63873	0.00832172	0.0985631	2.42103	2.2174	2.52043	3.11899	2.48957	2.83637
ENSMUSG00000022021.14	Diaph3	1122.51	0.592228	0.224431	-2.63879	0.00832014	0.0985631	1.22649	0.591175	1.09274	2.04325	1.19915	1.44331
ENSMUSG00000030122.12	Ptms	5831.5	-0.365318	0.138627	2.63526	0.00840737	0.0985631	-2.74393	-2.85611	-2.9542	-3.24589	-3.1165	-3.32594
ENSMUSG00000022094.15	Slc39a14	1160.68	-0.339504	0.12881	2.63571	0.00839621	0.0985631	0.607814	0.382341	0.357285	0.0265342	0.174127	0.0997033
ENSMUSG00000030168.13	Adipor2	1169.02	-0.327542	0.124226	2.63666	0.00837273	0.0985631	-1.08944	-1.12848	-0.981789	-1.45831	-1.44737	-1.32536
ENSMUSG00000050370.5	Ch25h	327.827	-0.582221	0.220467	2.64085	0.00826971	0.0985631	1.68116	1.64804	1.53814	1.17585	1.14498	0.674007
ENSMUSG00000075705.12	Msrb1	1179.83	-0.370657	0.140778	2.63292	0.00846555	0.0989826	-0.439547	-0.20549	-0.505422	-0.883522	-0.705005	-0.721849
ENSMUSG00000047648.13	Fbxo30	962.568	0.659203	0.250736	-2.62907	0.00856177	0.0999723	2.01093	1.56138	2.31922	3.08466	2.33965	2.51232
ENSMUSG00000029701.15	Rbm28	1423.82	0.302048	0.114933	-2.62803	0.00858803	0.100143	0.167753	0.0635815	0.0403656	0.538382	0.30633	0.301669
ENSMUSG00000073684.13	Faap20	380.137	-0.523005	0.199236	2.62505	0.00866363	0.100889	-1.65499	-1.26295	-1.54731	-2.21201	-1.95961	-1.90867
ENSMUSG00000042323.17	Pbrm1	2285.88	0.545225	0.207754	-2.62437	0.00868085	0.100953	1.57799	1.00407	1.64518	2.28147	1.5532	2.00542
ENSMUSG00000022452.16	Smdt1	1276.87	-0.399135	0.152168	2.62299	0.00871631	0.101229	-0.680413	-0.424895	-0.522439	-0.965683	-0.767748	-1.14079
ENSMUSG00000022322.8	Shcbp1	646.691	0.691605	0.263746	-2.62223	0.00873556	0.101316	1.65101	1.35856	1.88864	2.97219	1.94656	2.19534
ENSMUSG00000017802.14	Retreg3	840.409	-0.389987	0.148989	2.61755	0.00885627	0.10142	-0.653795	-0.648346	-0.590858	-1.13071	-0.850052	-1.10659
ENSMUSG00000026020.9	Nop58	3869.33	0.505287	0.193191	-2.61548	0.00891019	0.10142	0.797134	0.611388	0.885481	1.70849	0.967455	1.16835
ENSMUSG00000037221.13	Mospd3	363.099	-0.565399	0.216098	2.61641	0.00888608	0.10142	-1.97924	-1.79809	-2.27463	-2.76181	-2.11724	-2.76567
ENSMUSG00000036197.16	Gxylt1	412.715	0.606304	0.231828	-2.61532	0.0089145	0.10142	-0.691713	-0.990067	-0.736476	-0.00535214	-0.306714	-0.266673
ENSMUSG00000025437.15	Usp33	1065.57	0.500467	0.190914	-2.62142	0.0087564	0.10142	2.34946	2.00032	2.36899	3.10093	2.45356	2.72147
ENSMUSG00000025060.15	Slk	1383.59	0.551746	0.210925	-2.61585	0.00890067	0.10142	1.56124	0.899589	1.55633	2.23932	1.4896	1.93167
ENSMUSG00000005846.12	Rsl1d1	4051.92	0.519774	0.198729	-2.6155	0.00890975	0.10142	0.780212	0.605294	0.854152	1.63829	0.930438	1.24051
ENSMUSG00000063524.13	Eno1	33506.7	-0.320048	0.122187	2.61934	0.00881004	0.10142	-3.08189	-2.94607	-2.97939	-3.4545	-3.15277	-3.38519
ENSMUSG00000049577.15	Zfpm1	549.191	-0.563008	0.215213	2.61605	0.00889531	0.10142	-1.92019	-2.03021	-1.92618	-2.62989	-2.05006	-2.8211
ENSMUSG00000021891.8	Mettl6	451.375	0.482936	0.184451	-2.61824	0.00883858	0.10142	-0.0608073	-0.133486	0.112113	0.721826	0.175358	0.480044
ENSMUSG00000071076.6	Jund	1318.07	-0.675271	0.257834	2.61901	0.00881846	0.10142	0.25959	0.328489	0.850387	-0.308993	-0.0555781	-0.367798
ENSMUSG00000018848.4	Rars	6013.68	0.391357	0.149448	-2.61869	0.00882691	0.10142	0.705118	0.644962	0.717216	1.23057	0.983759	1.0098
ENSMUSG00000031562.15	Dctd	704.843	-0.380752	0.145455	2.61765	0.00885364	0.10142	-0.435526	-0.659737	-0.444875	-0.848779	-0.933232	-0.95641
ENSMUSG00000028431.11	Elp1	2589.65	0.286504	0.109317	-2.62085	0.00877106	0.10142	0.555576	0.401255	0.527922	0.683185	0.769352	0.836546
ENSMUSG00000028907.7	Utp11	1094.46	0.370787	0.141789	-2.61507	0.00892081	0.10142	0.383221	0.31903	0.167299	0.883728	0.528517	0.545942
ENSMUSG00000001999.15	Blvra	440.156	0.42528	0.162657	-2.61458	0.00893375	0.101433	0.0665356	0.0833655	0.275879	0.502159	0.447698	0.677068
ENSMUSG00000059316.2	Slc27a4	1043.22	-0.432933	0.165756	2.61187	0.00900472	0.102105	-0.693343	-0.337286	-0.750825	-1.05415	-0.877516	-1.15589
ENSMUSG00000024177.9	Nme4	597.478	-0.48281	0.184896	2.61126	0.00902101	0.102155	-1.53032	-1.17366	-1.28722	-1.78968	-1.69455	-1.97941
ENSMUSG00000006050.12	Sra1	1370.38	0.327581	0.125493	-2.61035	0.00904487	0.102291	0.220789	0.247941	0.114871	0.377973	0.622114	0.512219
ENSMUSG00000024056.10	Ndc80	584.63	0.593893	0.227604	-2.60932	0.00907223	0.102332	1.08198	0.694361	1.15453	2.09715	1.22088	1.47392
ENSMUSG00000036646.13	Man1b1	1389.33	-0.34548	0.132383	2.6097	0.00906223	0.102332	-1.43535	-1.10187	-1.22937	-1.7015	-1.53319	-1.59227
ENSMUSG00000027365.14	Trpm7	719.88	0.772412	0.296112	-2.60851	0.00909361	0.10244	0.643032	0.309463	0.859255	2.22663	1.05981	1.04815
ENSMUSG00000029992.14	Gfpt1	3054.58	0.434114	0.166779	-2.60293	0.00924314	0.103988	1.09353	0.619404	0.933681	1.46658	1.08472	1.3432
ENSMUSG00000016503.17	Gtf3a	480.656	-0.608042	0.233788	2.60082	0.00930006	0.104415	0.354264	0.233997	1.33463	0.140062	-0.0110287	-0.0779911
ENSMUSG00000049804.9	Armcx4	613.951	0.484782	0.186409	-2.60063	0.00930522	0.104415	1.34897	0.710176	1.14707	1.63737	1.34737	1.57739
ENSMUSG00000068196.5	Col8a1	9627.89	0.494185	0.19008	-2.59988	0.00932565	0.104508	2.00721	2.00458	1.87868	2.46139	2.36227	2.53894
ENSMUSG00000066149.11	Cdc26	344.722	-0.63858	0.245781	2.59817	0.00937231	0.104895	-3.26657	-2.88714	-2.84236	-3.91116	-3.45086	-3.48229
ENSMUSG00000025867.8	Cplx2	288.975	-0.570749	0.219747	2.5973	0.00939607	0.105024	-2.10533	-2.34008	-2.15219	-2.7096	-2.98599	-2.72817
ENSMUSG00000066440.5	Zfyve26	421.775	0.524103	0.201969	-2.59497	0.00946001	0.105058	0.126807	-0.119083	-0.294278	0.123542	0.508844	0.642978
ENSMUSG00000041355.13	Ssr2	4983.73	-0.302481	0.11654	2.59552	0.00944484	0.105058	0.0604181	0.00131291	-0.0161963	-0.39767	-0.235276	-0.27565
ENSMUSG00000027680.15	Fxr1	2332.87	0.599562	0.230982	-2.59571	0.00943948	0.105058	0.890913	0.650744	0.910487	1.97623	1.09336	1.26457
ENSMUSG00000029810.15	Tmem176b	2295.06	-0.300849	0.115931	2.59507	0.00945703	0.105058	0.724962	0.847409	0.678854	0.33583	0.522798	0.443776
ENSMUSG00000024483.19	Ankhd1	1001.24	0.585523	0.225491	-2.59666	0.0094135	0.105058	1.91249	1.21948	1.56076	2.51159	1.70674	2.14886
ENSMUSG00000023977.15	Ubr2	2384.6	0.41472	0.16004	-2.59135	0.00956006	0.105183	1.67514	1.16835	1.36904	1.72096	1.71688	1.9366
ENSMUSG00000057177.12	Gsk3a	1500.35	-0.323915	0.125054	2.59019	0.00959216	0.105183	-0.517933	-0.455128	-0.540033	-0.88924	-0.679062	-0.9458
ENSMUSG00000026585.13	Kifap3	1425.81	0.390554	0.150761	-2.59054	0.00958245	0.105183	0.764819	0.675746	0.834287	1.41131	0.85459	1.1484
ENSMUSG00000025369.15	Smarcc2	1762.81	0.448619	0.172988	-2.59335	0.00950454	0.105183	0.0218331	-0.419784	-0.580404	-0.0891151	0.065984	0.352258
ENSMUSG00000026781.17	Acbd5	400.644	0.704735	0.271979	-2.59114	0.00956586	0.105183	0.60966	0.462541	0.637959	1.84043	1.0221	1.13932
ENSMUSG00000032481.17	Smarcc1	4168.95	0.312383	0.120603	-2.59016	0.00959308	0.105183	0.401327	0.0425319	0.262434	0.613932	0.421406	0.559941
ENSMUSG00000035248.9	Tut7	701.728	0.501602	0.193478	-2.59255	0.00952675	0.105183	0.573828	0.153747	0.51758	1.28532	0.649667	0.846447
ENSMUSG00000034926.3	Dhcr24	1776.32	-0.333089	0.128513	2.59186	0.00954576	0.105183	-0.305684	-0.533557	-0.567146	-0.799448	-0.896087	-0.792859
ENSMUSG00000025856.15	Pdgfa	678.875	-0.494474	0.19082	2.59131	0.00956104	0.105183	-1.04445	-0.960141	-0.96417	-1.75527	-1.37353	-1.33717
ENSMUSG00000036499.9	Eea1	943.992	0.778872	0.300398	-2.5928	0.00951971	0.105183	1.75706	0.844153	1.64477	2.8525	1.79044	2.11466
ENSMUSG00000005871.15	Apc	1089.56	0.61443	0.237401	-2.58816	0.00964914	0.105529	1.17098	0.58981	1.28423	2.1102	1.21052	1.60583
ENSMUSG00000028080.16	Lrba	276.772	0.543891	0.210112	-2.58857	0.00963742	0.105529	1.06094	0.912459	1.31552	1.97479	1.37991	1.68256
ENSMUSG00000029550.11	Sppl3	529.718	-0.404816	0.156473	2.58712	0.00967807	0.10566	-0.442736	-0.465131	-0.301377	-0.89156	-0.719047	-0.81991
ENSMUSG00000040325.16	Dcaf1	1171.3	0.393139	0.152001	-2.58642	0.00969783	0.10566	1.2496	0.964262	1.16902	1.63476	1.39458	1.49254
ENSMUSG00000007411.16	Mark3	1593.99	-0.301713	0.116639	2.58673	0.00968924	0.10566	-0.0141541	-0.26319	0.108347	-0.293562	-0.488882	-0.354457
ENSMUSG00000006736.9	Tspan31	1881.41	-0.310508	0.120111	2.58517	0.00973307	0.105671	0.297296	0.392785	0.360468	-0.117195	0.164654	0.0321969
ENSMUSG00000002981.10	Clptm1	4418.35	-0.30386	0.117544	2.58508	0.00973556	0.105671	0.322791	0.521944	0.474741	0.0234334	0.222472	0.131786
ENSMUSG00000029071.16	Dvl1	885.36	-0.432775	0.16737	2.58574	0.00971704	0.105671	-1.95216	-1.98894	-2.10326	-2.42878	-2.24046	-2.66617
ENSMUSG00000057133.14	Chd6	429.579	0.598533	0.231678	-2.58347	0.00978131	0.106034	0.741764	0.312774	0.807416	1.26773	0.950602	1.36761
ENSMUSG00000068270.15	Shroom4	983.695	0.531603	0.206017	-2.58039	0.0098689	0.106849	1.43759	0.938787	1.22165	1.72701	1.49206	1.8692
ENSMUSG00000021843.17	Ktn1	2127.56	0.501812	0.194515	-2.57982	0.0098853	0.106893	1.82743	1.39252	1.766	2.40209	1.8404	2.22278
ENSMUSG00000081534.3	Slc48a1	1026.51	-0.509077	0.197446	2.57832	0.00992828	0.107089	-2.14487	-1.94788	-2.25573	-2.54161	-2.77531	-2.72562
ENSMUSG00000022186.14	Oxct1	3752.49	0.314644	0.122028	-2.57847	0.00992402	0.107089	0.111114	0.0397139	0.24055	0.658074	0.304202	0.353787
ENSMUSG00000033253.18	Szt2	467.057	0.559378	0.217082	-2.57681	0.00997174	0.10742	0.695725	0.16975	0.122867	0.613402	0.892182	1.04316
ENSMUSG00000020580.10	Rock2	4210.58	0.65198	0.25306	-2.57639	0.00998389	0.10742	1.39276	0.855576	1.41951	2.38344	1.37275	1.91707
ENSMUSG00000060802.8	B2m	8584.16	-0.333631	0.129544	2.57543	0.0100116	0.107584	1.78077	1.6107	1.58413	1.44914	1.08647	1.40146
ENSMUSG00000020477.10	Mrps24	892.168	-0.561817	0.218251	2.57417	0.010048	0.107707	-0.875932	-1.03763	-0.474583	-1.54201	-1.15818	-1.42389
ENSMUSG00000039656.17	Rxrb	815.398	-0.451759	0.17548	2.57441	0.0100411	0.107707	-1.54197	-1.07234	-1.44237	-1.83503	-1.67552	-1.89855
ENSMUSG00000024593.15	Megf10	864.545	0.573192	0.222767	-2.57305	0.0100806	0.107902	2.46215	1.64527	2.14157	2.74975	2.39736	2.71806
ENSMUSG00000000149.10	Gna12	1192.48	-0.403637	0.156893	2.57269	0.0100912	0.107902	-1.96886	-1.94465	-2.15942	-2.60544	-2.34928	-2.3604
ENSMUSG00000015094.16	Npdc1	1066.17	-0.364477	0.141825	2.56991	0.0101724	0.108635	-0.849608	-0.613171	-0.676197	-1.28063	-0.928135	-1.0371
ENSMUSG00000047126.17	Cltc	25732.6	0.579448	0.225574	-2.56877	0.0102061	0.108861	2.33683	1.8179	2.23652	3.15323	2.39945	2.58018
ENSMUSG00000031540.14	Kat6a	718.796	0.656483	0.256339	-2.56099	0.0104373	0.111052	1.23288	0.335553	0.825554	1.50938	1.00872	1.71591
ENSMUSG00000038510.12	Rpf2	553.871	0.590957	0.230738	-2.56116	0.0104322	0.111052	0.319748	-0.089127	0.263685	1.14557	0.496649	0.6637
ENSMUSG00000024493.9	Lars	4010.23	0.405819	0.15849	-2.56053	0.0104511	0.111062	1.00718	0.534005	0.80475	1.3378	1.05813	1.1177
ENSMUSG00000046711.16	Hmga1	6985.7	-0.725294	0.283476	2.55858	0.0105101	0.111552	-7.80619	-7.782	-8.64686	-8.54107	-8.86975	-9.09087
ENSMUSG00000034574.10	Daam1	907.577	0.537618	0.210347	-2.55586	0.0105926	0.112274	1.1647	0.545121	0.806348	1.58395	1.24139	1.28861
ENSMUSG00000041057.10	Wdr43	2134.02	0.554058	0.216812	-2.55548	0.0106042	0.112274	0.65973	0.35745	0.569813	1.49893	0.815996	0.987378
ENSMUSG00000032113.16	Chek1	248.409	0.736788	0.288462	-2.55419	0.0106435	0.112531	1.17536	0.970501	1.55039	2.74949	1.66594	1.69642
ENSMUSG00000024498.16	Tcerg1	1776.68	0.441173	0.172749	-2.55383	0.0106546	0.112531	0.99757	0.271803	0.726943	1.18949	0.86791	1.1732
ENSMUSG00000047045.17	Tmem164	1110.73	-0.324256	0.127007	2.55306	0.0106782	0.112643	-1.19276	-1.39087	-1.30727	-1.75735	-1.6047	-1.54235
ENSMUSG00000026922.13	Agpat2	461.558	-0.461047	0.180627	2.55248	0.0106959	0.112692	-1.5624	-1.35522	-1.34026	-1.86553	-1.88493	-1.96661
ENSMUSG00000067194.6	Eif1ax	1776.3	0.47071	0.184489	-2.55143	0.0107281	0.112894	-0.632587	-0.79874	-0.493695	0.0985376	-0.436784	-0.184098
ENSMUSG00000000340.10	Dbt	418.443	0.438411	0.171974	-2.54929	0.0107942	0.113451	1.38527	1.13566	1.43345	2.11378	1.55687	1.63109
ENSMUSG00000089682.10	Bcl2l2	285.031	-1.15008	0.451492	2.54728	0.0108567	0.113831	-5.3975	-4.79256	-4.11791	-5.23508	-5.43051	#NAME?
ENSMUSG00000044786.6	Zfp36	1004.5	-0.375854	0.147542	2.54744	0.0108517	0.113831	0.558995	0.385724	0.262199	0.249507	-0.108763	-0.118738
ENSMUSG00000026277.14	Stk25	1499.61	-0.374686	0.147122	2.54678	0.0108722	0.113855	-1.20743	-1.02073	-1.05469	-1.56063	-1.5246	-1.40016
ENSMUSG00000024238.15	Zeb1	1012.46	0.517181	0.203198	-2.54521	0.0109212	0.113953	0.722023	0.387949	0.751992	1.52241	0.844644	1.06354
ENSMUSG00000039294.14	Cybc1	636.496	-0.358857	0.140986	2.54534	0.0109173	0.113953	-0.400136	-0.326131	-0.3746	-0.790454	-0.623735	-0.78523
ENSMUSG00000041769.13	Ppp2r2d	841.035	-0.361827	0.142123	2.54588	0.0109004	0.113953	-0.707319	-0.913037	-0.67757	-1.24493	-1.15201	-1.03061
ENSMUSG00000031586.17	Rbpms	891.508	-0.375553	0.147811	2.54077	0.011061	0.115133	0.25389	0.201863	0.272103	-0.0513896	-0.0918311	-0.247696
ENSMUSG00000021096.11	Ppm1a	1179.64	-0.337162	0.132685	2.54107	0.0110514	0.115133	-0.737573	-1.15512	-0.919904	-1.2035	-1.44227	-1.23846
ENSMUSG00000038587.10	Akap12	12844.3	0.438325	0.172566	-2.54004	0.0110838	0.115232	1.09177	0.655708	0.669836	1.30244	1.05893	1.27879
ENSMUSG00000054509.7	Parp4	461.953	0.566156	0.222949	-2.5394	0.0111044	0.115307	1.97532	1.04944	1.57186	2.16333	1.92961	2.06044
ENSMUSG00000001158.13	Snrnp27	662.486	0.484856	0.191088	-2.53734	0.0111698	0.115847	-0.750914	-0.746834	-1.0487	-0.323016	-0.625219	-0.28065
ENSMUSG00000041548.4	Hspb8	1023.28	-0.42757	0.168546	2.53682	0.0111865	0.11588	-0.92169	-0.762685	-0.851706	-1.33679	-1.23465	-1.2881
ENSMUSG00000039414.10	Heatr5b	1473.84	0.376667	0.148743	-2.53233	0.0113307	0.116303	1.58385	1.13362	1.28212	1.67996	1.58594	1.76649
ENSMUSG00000051223.14	Bzw1	5370.2	0.523844	0.206873	-2.53219	0.0113351	0.116303	-0.595821	-0.640059	-0.478916	0.399359	-0.232185	-0.242556
ENSMUSG00000025240.10	Sacm1l	1189.19	0.727326	0.287138	-2.53302	0.0113085	0.116303	2.21637	1.99315	2.49275	3.84655	2.59932	2.71543
ENSMUSG00000024044.19	Epb41l3	3555.89	0.37232	0.146893	-2.53464	0.0112561	0.116303	1.08129	0.572889	0.857054	1.28083	0.964948	1.30095
ENSMUSG00000037149.10	Ddx1	4105.26	0.426231	0.168203	-2.53403	0.0112758	0.116303	0.291583	0.207477	0.366106	1.05627	0.535368	0.564212
ENSMUSG00000027879.9	Sec22b	1325.44	0.375706	0.148332	-2.53287	0.0113134	0.116303	-0.0516182	0.0226833	0.157195	0.51479	0.323395	0.402167
ENSMUSG00000019370.10	Calm3	5752.95	-0.333181	0.131475	2.53417	0.0112715	0.116303	-2.53864	-2.49481	-2.61607	-2.95135	-2.80245	-2.93616
ENSMUSG00000037339.17	Fam53a	499.779	-0.454262	0.179335	2.53303	0.011308	0.116303	-1.93234	-2.19761	-2.10546	-2.49893	-2.31535	-2.77896
ENSMUSG00000047565.5	Acot10	206.618	1.33408	0.527046	-2.53124	0.0113661	0.116456	5.82939	7.00861	6.33064	7.48464	7.45017	7.55553
ENSMUSG00000022234.15	Cct5	13361.5	0.312398	0.123433	-2.5309	0.011377	0.116456	-0.141391	-0.0104535	-0.113946	0.31132	0.235369	0.091584
ENSMUSG00000051154.11	Commd3	1443.8	0.454402	0.179684	-2.52889	0.0114424	0.116556	0.434436	0.353341	0.338276	1.19639	0.731983	0.591774
ENSMUSG00000020986.13	Sec23a	6572.11	0.412672	0.163243	-2.52796	0.0114726	0.116556	1.3861	1.0614	1.51833	1.93859	1.51854	1.7314
ENSMUSG00000043895.6	S1pr2	1407.87	-0.298272	0.117964	2.5285	0.0114551	0.116556	-0.647144	-0.801208	-0.784568	-1.09225	-0.940957	-1.12422
ENSMUSG00000038774.9	Ascc3	1511.31	0.718933	0.284152	-2.5301	0.0114028	0.116556	1.74875	1.19198	1.71675	3.05373	1.76448	2.11949
ENSMUSG00000036943.9	Rab8b	380.495	0.550747	0.217737	-2.52941	0.0114253	0.116556	-0.523646	-0.97785	-0.473067	0.21544	-0.511047	-0.0285863
ENSMUSG00000020069.16	Hnrnph3	417.586	0.42886	0.169664	-2.5277	0.0114814	0.116556	0.633506	0.16075	0.470093	0.949204	0.619286	0.899143
ENSMUSG00000050212.4	Eva1b	1380.72	-0.479304	0.189611	2.52783	0.011477	0.116556	-1.1952	-1.18093	-0.724028	-1.6491	-1.39057	-1.5719
ENSMUSG00000023150.14	Ivns1abp	2144.21	0.576778	0.228616	-2.52291	0.0116387	0.118015	-0.0571529	-0.517297	-0.00891939	0.839709	0.0329571	0.324894
ENSMUSG00000028879.4	Stx12	1228.74	0.349463	0.138573	-2.52186	0.0116736	0.11823	0.0731987	0.0617736	0.137931	0.46273	0.417544	0.438722
ENSMUSG00000020664.10	Dld	2337.81	0.509287	0.202223	-2.51845	0.0117874	0.119242	0.899751	0.806898	1.0336	1.91247	1.15814	1.25806
ENSMUSG00000033068.16	Entpd6	404.292	-0.405487	0.161055	2.51769	0.0118128	0.119281	0.0620368	0.260835	0.195574	-0.398468	-0.212547	-0.124754
ENSMUSG00000030682.4	Cdipt	2580.88	-0.3984	0.158252	2.51751	0.0118189	0.119281	-0.733096	-0.453522	-0.749647	-1.06245	-0.969887	-1.11351
ENSMUSG00000021577.14	Sdha	4958.08	0.217262	0.0863518	-2.51601	0.0118691	0.119648	0.569013	0.536725	0.581349	0.811369	0.647175	0.839203
ENSMUSG00000025854.15	Fam20c	349.911	-0.495156	0.196994	2.51356	0.0119519	0.120202	-0.34995	-0.575287	-0.155151	-1.04233	-0.978675	-0.596147
ENSMUSG00000012443.4	Kif11	1253.37	0.661116	0.262991	-2.51384	0.0119425	0.120202	1.96352	1.28451	1.8496	3.00217	1.98865	2.18878
ENSMUSG00000022019.16	Tdrd3	283.828	0.592367	0.235778	-2.51239	0.0119916	0.120461	0.652011	0.0313526	0.61608	1.40063	0.63027	1.03047
ENSMUSG00000022125.7	Cln5	720.839	-0.410032	0.163305	2.51083	0.0120448	0.120855	-0.0429662	-0.0566399	0.185848	-0.312137	-0.759069	-0.216707
ENSMUSG00000028970.9	Abcb1b	411.823	0.47704	0.190094	-2.50949	0.0120905	0.120918	0.946022	1.14353	1.11214	1.76434	1.42242	1.42595
ENSMUSG00000033392.16	Clasp2	847.551	0.454674	0.181187	-2.50941	0.0120932	0.120918	1.55917	1.11164	1.76377	2.15414	1.64432	1.96969
ENSMUSG00000090733.6	Rps27	5170.2	1.02384	0.407876	-2.51016	0.0120676	0.120918	-9.54777	-10.4366	-9.46954	-8.86557	-8.33596	-8.93056
ENSMUSG00000014470.4	Rnf166	482.014	-0.477162	0.190224	2.50842	0.0121272	0.121118	-1.36029	-1.21582	-1.2662	-1.92857	-1.50773	-1.83504
ENSMUSG00000022561.13	Gpaa1	1131.59	-0.349193	0.13932	2.50641	0.0121965	0.121668	0.0823472	0.113946	-0.00433475	-0.296977	-0.20715	-0.38554
ENSMUSG00000034973.16	Dop1a	425.512	0.610914	0.243913	-2.50464	0.0122578	0.122139	1.41619	1.12306	1.70124	2.63078	1.7501	1.86208
ENSMUSG00000070733.13	Fryl	1192.78	0.554711	0.221552	-2.50375	0.0122886	0.122164	1.73577	1.01264	1.2226	1.78403	1.71498	2.00074
ENSMUSG00000062604.11	Srpk2	699.114	0.396711	0.158445	-2.50378	0.0122875	0.122164	0.390025	0.328544	0.578537	1.01339	0.66366	0.824203
ENSMUSG00000031555.15	Adam9	4171.94	0.448268	0.17932	-2.49982	0.0124256	0.123126	1.50482	1.24158	1.46006	2.10135	1.58883	1.86713
ENSMUSG00000066571.13	4931406P16Rik	954.672	0.342984	0.137207	-2.49975	0.0124282	0.123126	1.05254	0.696992	1.15057	1.3749	1.16631	1.35412
ENSMUSG00000001661.5	Hoxc6	533.112	-0.513616	0.20545	2.49995	0.012421	0.123126	0.0393159	0.0588157	0.289717	-0.370724	-0.639554	-0.267448
ENSMUSG00000023852.14	Chd1	1379.13	0.584118	0.233763	-2.49876	0.012463	0.123329	1.74013	0.894569	1.37599	2.21298	1.50559	2.00697
ENSMUSG00000051236.13	Msrb3	2198.01	0.507879	0.203323	-2.49789	0.0124933	0.123388	-0.0952481	-0.408021	-0.0783554	0.749993	0.00719823	0.233579
ENSMUSG00000026342.10	Slc35f5	732.262	-0.34297	0.13731	2.49777	0.0124976	0.123388	0.788883	0.684886	1.03459	0.564203	0.282979	0.592074
ENSMUSG00000041236.8	Vps41	1160.69	0.562506	0.225242	-2.49734	0.0125129	0.123399	-0.210891	-0.293362	-0.0189499	0.908276	0.148227	0.204755
ENSMUSG00000042558.16	Adprhl2	570.221	-0.408838	0.163737	2.49692	0.0125278	0.123405	-1.04319	-0.751043	-0.894069	-1.29325	-1.17619	-1.47464
ENSMUSG00000033799.10	Tasor2	1168.53	0.810985	0.324991	-2.49541	0.0125812	0.12379	2.95145	1.81635	2.85363	4.01977	2.89392	3.17994
ENSMUSG00000021981.10	Cab39l	372.845	0.70567	0.282878	-2.49461	0.0126094	0.123816	-1.94076	-2.37349	-2.0227	-0.788224	-1.85689	-1.53081
ENSMUSG00000024384.4	Iws1	835.381	0.456234	0.182897	-2.49449	0.0126137	0.123816	0.746162	0.354887	0.656616	1.43718	0.79887	0.879706
ENSMUSG00000042426.6	Dhx29	1217.51	0.338208	0.135602	-2.49412	0.012627	0.123816	0.57763	0.375785	0.596098	1.03648	0.614799	0.852192
ENSMUSG00000038517.15	Tbkbp1	439.314	-0.587891	0.236024	2.49081	0.0127451	0.123988	-2.12485	-1.51202	-2.21804	-2.48511	-2.28653	-2.78302
ENSMUSG00000036333.11	Kidins220	1888.84	0.417427	0.167436	-2.49305	0.0126651	0.123988	1.83704	1.29159	1.57025	1.99447	1.81609	2.03939
ENSMUSG00000025171.2	Ubtd1	1044.27	-0.456185	0.183091	2.49157	0.0127181	0.123988	-1.87104	-1.81872	-1.93095	-2.30723	-2.03456	-2.64152
ENSMUSG00000024947.17	Men1	1302.45	-0.338505	0.13583	2.49214	0.0126978	0.123988	-0.0901318	-0.328655	-0.267714	-0.68858	-0.448295	-0.617287
ENSMUSG00000005674.9	Tomm40l	193.41	-0.605338	0.243018	2.49093	0.0127411	0.123988	-1.09738	-0.394195	-0.888049	-1.37172	-1.2368	-1.66656
ENSMUSG00000035478.14	Mbd3	2652.17	-0.362208	0.14533	2.49231	0.0126915	0.123988	-1.87639	-2.04253	-1.82508	-2.48623	-2.11489	-2.2458
ENSMUSG00000031314.18	Taf1	722.149	0.562474	0.225752	-2.49156	0.0127182	0.123988	1.27263	0.487899	0.956251	1.84983	1.18029	1.43597
ENSMUSG00000055839.6	Elob	2696.74	-0.364435	0.146343	2.49028	0.0127642	0.124034	-2.88325	-2.57663	-2.72995	-2.98357	-3.22986	-3.17877
ENSMUSG00000024952.13	Rps6ka4	1792.8	-0.32455	0.13051	2.48679	0.0128902	0.124837	-1.90719	-1.69838	-1.82407	-2.19564	-2.05091	-2.17323
ENSMUSG00000033009.15	Ogfod1	653.115	0.326961	0.131448	-2.48738	0.0128688	0.124837	-0.121253	-0.194077	-0.12455	0.216135	-0.102064	0.334247
ENSMUSG00000029502.14	Golga3	1510.96	0.315886	0.127021	-2.48687	0.0128873	0.124837	0.511665	0.211777	0.594493	0.700837	0.610444	0.910122
ENSMUSG00000036026.15	Tmem63b	1288.8	-0.375954	0.15126	2.48548	0.0129376	0.124875	-0.0557988	0.0274961	-0.148775	-0.638669	-0.281687	-0.388123
ENSMUSG00000026914.15	Psmd14	2596.35	0.442954	0.178212	-2.48554	0.0129356	0.124875	0.324295	0.333867	0.488671	1.08078	0.628741	0.771121
ENSMUSG00000049717.9	Lig4	319.53	0.54476	0.219152	-2.48576	0.0129276	0.124875	1.51529	1.65274	1.81352	2.4774	1.64739	2.50619
ENSMUSG00000035021.13	Baz1a	1139.14	0.491615	0.19788	-2.4844	0.0129769	0.125034	1.28236	0.738495	1.1249	1.79445	1.32643	1.48599
ENSMUSG00000053950.10	Adnp2	621.328	-0.345421	0.139045	2.48423	0.012983	0.125034	0.954995	0.733498	1.12741	0.593096	0.666662	0.494098
ENSMUSG00000033545.14	Znrf1	618.237	-0.528784	0.213137	2.48095	0.0131032	0.125321	-2.33048	-1.6529	-1.7565	-2.46082	-2.30753	-2.56741
ENSMUSG00000025511.15	Tspan4	3937.82	-0.359491	0.14496	2.47993	0.0131407	0.125321	-0.269406	-0.112988	-0.0785546	-0.606155	-0.335908	-0.628538
ENSMUSG00000001305.5	Rrp15	551.966	0.406641	0.164059	-2.47863	0.0131889	0.125321	-0.453684	-0.841171	-0.658957	-0.269093	-0.425242	-0.118554
ENSMUSG00000051234.6	Rnf7	893.042	-0.955055	0.385361	2.47834	0.0131996	0.125321	-6.33457	-5.28858	-6.21146	-6.21433	-7.18764	-7.79839
ENSMUSG00000042626.13	Shc1	2518.73	-0.360255	0.145365	2.47828	0.0132017	0.125321	-2.43826	-2.3632	-2.13499	-2.86675	-2.42833	-2.73281
ENSMUSG00000032673.5	Prorsd1	257.934	0.52108	0.209933	-2.48212	0.0130603	0.125321	-0.173055	0.114775	0.48055	1.00499	0.372977	0.640068
ENSMUSG00000063077.15	Kif1b	2144.32	0.462725	0.186505	-2.48103	0.0131002	0.125321	1.23023	0.636279	0.96405	1.49741	1.14419	1.48521
ENSMUSG00000025232.8	Hexa	2924.67	-0.327456	0.131895	2.48271	0.0130389	0.125321	0.219105	0.441686	0.156029	-0.171749	-0.00796221	-0.0168141
ENSMUSG00000038508.7	Gdf15	852.068	-0.646195	0.260415	2.4814	0.0130867	0.125321	1.0898	1.14162	1.49527	0.582795	0.580002	0.528843
ENSMUSG00000030660.9	Pik3c2a	2175.98	1.02669	0.413781	-2.48123	0.0130928	0.125321	1.93536	1.65274	2.28508	3.72986	2.53613	2.84382
ENSMUSG00000047497.10	Adamts12	1352.95	0.501214	0.202212	-2.47865	0.013188	0.125321	1.89546	1.32722	1.64704	2.31649	1.71723	2.29804
ENSMUSG00000060206.11	Zfp462	1167.98	0.490377	0.197732	-2.48001	0.0131379	0.125321	1.76572	1.03207	1.34367	1.88005	1.57396	2.02034
ENSMUSG00000046111.17	Cep295	292.099	0.714302	0.28813	-2.4791	0.0131715	0.125321	1.40697	0.958738	1.27433	2.61397	1.54444	1.74425
ENSMUSG00000020078.16	Vps26a	1346.04	0.519614	0.209841	-2.47623	0.0132778	0.125673	0.418478	0.29869	0.581448	1.47079	0.58226	0.823288
ENSMUSG00000028641.16	P3h1	3018.27	-0.372286	0.15034	2.4763	0.0132753	0.125673	0.615322	0.672133	0.630553	0.134566	0.372481	0.267356
ENSMUSG00000048118.17	Arid4a	432.423	0.516421	0.208561	-2.47611	0.0132824	0.125673	1.64709	0.947551	1.28455	1.9951	1.37473	1.93257
ENSMUSG00000026721.16	Rabgap1l	237.603	0.583595	0.235776	-2.4752	0.013316	0.125853	0.977773	1.02979	1.16289	2.00087	1.29538	1.72819
ENSMUSG00000073987.4	Ggh	507.565	0.47927	0.19377	-2.4734	0.0133835	0.126353	1.33576	1.03518	1.55688	2.05311	1.60389	1.77629
ENSMUSG00000029405.16	G3bp2	3206.4	0.430194	0.173981	-2.47264	0.0134118	0.126481	0.179885	0.254955	0.399796	1.08262	0.487658	0.579422
ENSMUSG00000025510.14	Cd151	3356.5	-0.40284	0.162978	2.47175	0.0134454	0.126504	-0.149477	0.179758	-0.0294997	-0.432848	-0.240548	-0.551972
ENSMUSG00000021112.9	Mpp5	544.106	0.657515	0.266054	-2.47136	0.01346	0.126504	1.01084	0.775194	1.30071	2.44636	1.28402	1.51052
ENSMUSG00000026131.20	Dst	1801.88	0.581326	0.235249	-2.47111	0.0134696	0.126504	0.8226	0.175109	0.570814	1.08795	0.840281	1.24892
ENSMUSG00000028029.11	Aimp1	1964.75	0.359858	0.145631	-2.47102	0.0134729	0.126504	0.201799	0.382292	0.25538	0.836224	0.58807	0.478329
ENSMUSG00000041133.11	Smc1a	2184.37	0.448464	0.181578	-2.46982	0.0135181	0.126791	1.00841	0.458073	0.745836	1.43153	0.79474	1.25766
ENSMUSG00000018425.18	Dhx40	660.943	0.635721	0.257475	-2.46906	0.0135469	0.126923	0.215885	0.0854986	0.692853	1.61479	0.783372	0.654856
ENSMUSG00000037270.18	4932438A13Rik	520.495	0.700495	0.283769	-2.46854	0.0135665	0.126969	2.38674	1.30428	2.29501	3.10685	2.26048	2.7247
ENSMUSG00000032562.13	Gnai2	14293.5	-0.295928	0.119924	2.46763	0.0136009	0.127153	-1.15556	-0.977356	-1.10832	-1.48993	-1.26059	-1.41909
ENSMUSG00000024150.12	Mcfd2	2219.47	-0.319079	0.12934	2.46699	0.0136256	0.127246	-0.363362	-0.049033	-0.0468302	-0.537614	-0.419569	-0.50566
ENSMUSG00000011752.7	Pgam1	3725.38	-0.682894	0.277174	2.46377	0.0137482	0.128114	-6.83568	-6.07629	-5.73986	-7.16892	-6.14018	-7.26885
ENSMUSG00000031207.16	Msn	31489.9	0.354024	0.143677	-2.46403	0.0137385	0.128114	0.535863	0.186047	0.188705	0.697846	0.506478	0.694692
ENSMUSG00000031357.3	Syap1	685.482	0.612225	0.248873	-2.45999	0.0138941	0.129194	0.404191	0.433227	0.905957	1.65789	1.09581	0.951508
ENSMUSG00000032399.8	Rpl4	29753	0.312591	0.127057	-2.46023	0.0138847	0.129194	-1.42996	-1.35054	-1.32314	-0.918242	-1.15192	-1.13379
ENSMUSG00000032050.18	Rdx	3123.54	0.504861	0.205347	-2.45858	0.0139488	0.129535	0.721149	0.301076	0.772959	1.59206	0.678207	1.05293
ENSMUSG00000028936.15	Rpl22	5359.75	0.39276	0.159771	-2.45827	0.0139608	0.129535	-1.77724	-2.06683	-2.00072	-1.53042	-1.75149	-1.4404
ENSMUSG00000035443.10	Thyn1	2025.98	0.36566	0.148821	-2.45705	0.0140085	0.129838	-0.0314928	0.24088	0.205384	0.660032	0.344598	0.46415
ENSMUSG00000030970.16	Ctbp2	1559.58	-0.270987	0.110315	2.45647	0.0140308	0.129905	0.608471	0.664032	0.776912	0.317792	0.327758	0.536197
ENSMUSG00000040481.17	Bptf	1778.28	0.481104	0.19597	-2.45499	0.014089	0.130184	0.898098	0.212454	0.617182	1.0929	0.758032	1.19602
ENSMUSG00000024955.15	Esrra	662.242	-0.566597	0.2308	2.45493	0.0140911	0.130184	-1.40736	-0.913929	-1.53649	-1.89638	-1.64639	-1.96078
ENSMUSG00000032245.12	Cln6	256.075	-0.458486	0.186799	2.45444	0.0141105	0.130224	-0.83306	-0.67572	-0.540725	-1.23692	-1.09808	-1.12393
ENSMUSG00000022594.14	Lynx1	415.72	-0.710235	0.289784	2.45091	0.0142494	0.131365	-3.10363	-2.48987	-3.15371	-3.52612	-3.10118	-4.40744
ENSMUSG00000024290.9	Rock1	1223.26	0.570746	0.232947	-2.45011	0.0142811	0.131482	1.42794	1.0691	1.84877	2.3927	1.80328	1.93188
ENSMUSG00000027490.17	E2f1	630.237	-0.441926	0.180391	2.44983	0.0142925	0.131482	-1.1142	-0.668872	-1.19924	-1.49811	-1.34836	-1.4456
ENSMUSG00000018442.13	Derl2	948.082	-0.271632	0.110897	2.44941	0.014309	0.131493	-0.203191	-0.20055	-0.170889	-0.522471	-0.485283	-0.437584
ENSMUSG00000022285.17	Ywhaz	3626.48	0.427812	0.174798	-2.44746	0.0143867	0.131926	-4.63532	-4.45255	-4.64923	-3.96504	-4.12245	-4.3251
ENSMUSG00000000787.12	Ddx3x	7483.91	0.642089	0.262313	-2.44779	0.0143734	0.131926	0.663657	0.330476	0.667589	1.81674	0.878406	0.971406
ENSMUSG00000039585.15	Myo9a	538.663	0.65302	0.266941	-2.44631	0.0144326	0.132207	1.78293	1.05422	1.79656	2.66893	1.64127	2.28262
ENSMUSG00000024078.7	Ttc27	790.674	0.311254	0.12726	-2.44582	0.0144521	0.132245	0.344066	0.189291	0.351762	0.680171	0.493005	0.584956
ENSMUSG00000027774.16	Gfm1	1532.88	0.287805	0.117712	-2.44499	0.0144856	0.132411	0.608814	0.400264	0.484754	0.788003	0.804769	0.710332
ENSMUSG00000024587.10	Nars	8984.26	0.312032	0.127657	-2.44429	0.0145136	0.132444	0.263761	0.139233	0.14249	0.642038	0.390355	0.421385
ENSMUSG00000040560.10	Wdr7	638.497	0.337447	0.138064	-2.44414	0.0145199	0.132444	1.25202	0.986481	1.15797	1.52303	1.45546	1.41613
ENSMUSG00000014956.15	Ppp1cb	3267.43	0.568135	0.232566	-2.44289	0.0145701	0.132762	0.744353	0.649574	1.10892	1.94841	1.08557	1.27411
ENSMUSG00000027078.14	Ube2l6	400.873	-0.552541	0.226275	2.4419	0.0146102	0.132847	-1.0027	-0.526273	-1.02385	-1.41279	-1.4539	-1.31612
ENSMUSG00000038697.15	Taf5l	518.856	-0.469851	0.192405	2.44199	0.0146065	0.132847	-1.4201	-1.59563	-0.99034	-2.08952	-1.84633	-1.54493
ENSMUSG00000023051.11	Tarbp2	756.545	-0.536665	0.219875	2.44077	0.0146559	0.133122	-2.99604	-3.47896	-3.3304	-3.87623	-3.85438	-3.74683
ENSMUSG00000041935.10	AW549877	350.659	0.554503	0.227243	-2.44013	0.0146818	0.133217	0.0494026	-0.12316	0.452951	0.874092	0.441272	0.805161
ENSMUSG00000029486.13	Mrpl1	437.221	0.632195	0.259322	-2.43787	0.014774	0.133912	1.27656	0.865687	1.26345	2.39823	1.37956	1.63453
ENSMUSG00000047824.13	Pygo2	1393.3	-0.393701	0.161565	2.4368	0.0148178	0.134169	-1.34914	-1.23149	-1.4487	-1.73412	-1.50708	-1.98314
ENSMUSG00000029229.8	Chic2	414.053	-0.43899	0.180186	2.43631	0.0148378	0.134209	-0.799361	-1.03612	-0.451515	-1.14548	-1.08441	-1.35221
ENSMUSG00000036565.7	Ttyh3	2429.88	-0.355353	0.145938	2.43496	0.0148936	0.13434	-1.27311	-1.62803	-1.68816	-2.03051	-1.74915	-1.90294
ENSMUSG00000002058.13	Unc119	351.454	-0.558786	0.22948	2.43501	0.0148913	0.13434	-1.13287	-1.12621	-0.791485	-1.58501	-1.16922	-1.94638
ENSMUSG00000048874.15	Phf3	1410.32	0.420235	0.172593	-2.43483	0.014899	0.13434	1.36658	0.86966	1.22499	1.8151	1.26807	1.60473
ENSMUSG00000034575.13	Tent4a	734.376	-0.339124	0.139319	2.43414	0.014927	0.134369	-0.145302	-0.346242	-0.296649	-0.712595	-0.627463	-0.513629
ENSMUSG00000034848.17	Ttc21b	490.07	0.400637	0.164627	-2.43361	0.0149489	0.134369	1.28808	0.894539	1.09122	1.7526	1.25875	1.45396
ENSMUSG00000027245.11	Hypk	369.835	0.799021	0.328291	-2.43388	0.0149379	0.134369	5.53333	5.66316	5.58992	6.71093	6.45984	5.80845
ENSMUSG00000021639.17	Gtf2h2	439.177	0.534581	0.219888	-2.43115	0.015051	0.134705	0.880549	0.511096	1.14041	1.67504	1.12656	1.38867
ENSMUSG00000021144.14	Mta1	3154.61	-0.328656	0.135188	2.43111	0.0150525	0.134705	-0.927954	-1.09045	-1.23663	-1.50564	-1.40141	-1.40034
ENSMUSG00000031925.17	Maml2	433.498	0.510681	0.210085	-2.43083	0.0150644	0.134705	1.78473	1.08427	1.53546	2.08582	1.63508	2.1566
ENSMUSG00000021103.12	Mnat1	948.544	0.316421	0.130131	-2.43156	0.0150338	0.134705	0.255189	0.410995	0.307073	0.690393	0.592916	0.6258
ENSMUSG00000026491.13	Ahctf1	2157.22	0.517078	0.212606	-2.4321	0.0150116	0.134705	1.64878	1.03855	1.63112	2.40396	1.66402	1.81422
ENSMUSG00000024759.14	Atl3	2330.21	0.3591	0.147759	-2.43031	0.015086	0.134759	0.528591	0.218652	0.550563	1.06836	0.548991	0.744277
ENSMUSG00000005262.13	Ufd1	1309.63	0.310519	0.127796	-2.42981	0.0151069	0.134806	0.0889387	0.17956	0.133385	0.588977	0.307739	0.378563
ENSMUSG00000022451.12	Twf1	1506.13	0.335268	0.138119	-2.42739	0.0152078	0.135566	-0.40176	-0.565054	-0.282954	-0.0113009	-0.226497	-0.0283262
ENSMUSG00000039886.8	Tmem120a	1501.92	-0.397167	0.163716	2.42595	0.0152683	0.135965	-1.42477	-1.37341	-1.24068	-1.7709	-1.46247	-2.0016
ENSMUSG00000021608.15	Lpcat1	577.127	-0.333618	0.137614	2.4243	0.0153377	0.136302	0.086207	0.115998	0.184857	-0.347785	-0.190926	-0.121303
ENSMUSG00000040322.10	Slc25a24	2417.9	0.613714	0.253133	-2.42447	0.0153306	0.136302	0.292675	0.213016	0.476627	1.50902	0.698142	0.726733
ENSMUSG00000061455.13	Stx17	334.887	0.416159	0.171822	-2.42203	0.015434	0.137017	-0.421839	-0.63238	-0.233188	0.11237	-0.163399	0.0122762
ENSMUSG00000029713.15	Gnb2	10143.1	-0.324883	0.134202	2.42085	0.0154841	0.137167	-0.487332	-0.229882	-0.232156	-0.641466	-0.565457	-0.758366
ENSMUSG00000002274.13	Metrn	312.811	-0.802578	0.331573	2.42051	0.0154986	0.137167	-3.4311	-3.46988	-3.09734	-4.10057	-3.67406	-4.66722
ENSMUSG00000078670.3	Fam174b	215.099	-0.635357	0.262447	2.4209	0.0154822	0.137167	-2.07132	-1.97596	-2.39543	-2.64005	-2.71056	-3.16372
ENSMUSG00000074305.9	Peak1	2284.73	0.602202	0.248835	-2.42008	0.0155171	0.137189	1.29079	0.340162	0.777255	1.48207	1.00525	1.61435
ENSMUSG00000022346.15	Myc	2523.38	-0.242716	0.100353	2.41861	0.0155798	0.137462	0.959866	0.717635	0.924444	0.609483	0.629013	0.583488
ENSMUSG00000025995.16	Wdr75	2014.86	0.436582	0.180482	-2.41898	0.0155641	0.137462	0.973476	0.695079	1.11803	1.66531	1.16493	1.28706
ENSMUSG00000007950.9	Abhd8	982.113	-0.632895	0.261797	2.41751	0.0156273	0.13758	-3.58019	-2.94754	-2.93499	-3.82535	-3.43181	-4.17692
ENSMUSG00000020235.16	Fzr1	1183.67	-0.288453	0.119307	2.41773	0.0156177	0.13758	-0.247163	-0.276367	-0.242571	-0.620588	-0.540238	-0.518034
ENSMUSG00000046818.7	Ddit4l	466.475	-0.407154	0.168495	2.41641	0.0156743	0.13758	0.222388	0.0444184	0.171791	-0.228821	-0.622038	-0.0644113
ENSMUSG00000029415.4	Sdad1	892.23	0.360262	0.149114	-2.41602	0.0156911	0.13758	0.670502	0.13006	0.50302	0.881945	0.651587	0.808031
ENSMUSG00000002107.18	Celf2	921.813	0.424794	0.175775	-2.41669	0.0156623	0.13758	1.01168	0.448745	0.902086	1.21726	1.04249	1.31757
ENSMUSG00000029918.9	Mrps33	233.052	0.5988	0.247739	-2.41706	0.0156464	0.13758	-0.769983	-1.02603	-0.522492	-0.0534013	0.0103737	-0.399776
ENSMUSG00000034867.16	Ankrd27	932.231	-0.347821	0.143983	2.41571	0.0157047	0.13758	-1.33365	-1.36501	-1.11229	-1.84482	-1.52271	-1.50795
ENSMUSG00000003363.15	Pld3	2146.26	-0.370671	0.153514	2.41457	0.0157537	0.137869	1.21723	1.23243	1.07001	0.489118	0.882321	1.01817
ENSMUSG00000020115.3	Tbk1	632.31	0.474335	0.196622	-2.41242	0.0158471	0.138273	1.13805	0.916083	1.03653	1.77479	1.32815	1.47571
ENSMUSG00000045411.16	2410002F23Rik	616.114	-0.4264	0.176754	2.4124	0.015848	0.138273	-2.46558	-2.48115	-2.73291	-2.94924	-2.78204	-3.22682
ENSMUSG00000035851.14	Ythdc1	978.719	0.411217	0.170452	-2.41251	0.0158429	0.138273	1.09123	0.624476	1.00552	1.62537	0.962354	1.33592
ENSMUSG00000038034.15	Igsf8	957.179	-0.398677	0.165377	2.41072	0.0159213	0.138353	0.495103	0.392832	0.0659251	-0.136147	-0.098335	-0.0471044
ENSMUSG00000040888.10	Gfer	793.578	-0.334532	0.13875	2.41104	0.0159071	0.138353	-1.23541	-1.18627	-1.15477	-1.47053	-1.42638	-1.71453
ENSMUSG00000034673.14	Pbx2	523.657	-0.387105	0.160554	2.41106	0.0159063	0.138353	-0.993684	-1.16317	-1.11556	-1.68204	-1.22889	-1.52369
ENSMUSG00000010307.7	Tmem86a	265.36	-0.519641	0.2155	2.41133	0.0158946	0.138353	-0.672274	-0.128484	-0.543493	-0.992249	-0.759449	-1.11335
ENSMUSG00000053929.17	Cyhr1	1189.6	-0.419874	0.17426	2.40946	0.015976	0.138689	-1.69547	-1.40208	-1.62692	-2.31783	-1.65144	-2.01766
ENSMUSG00000020171.8	Yeats4	410.934	-0.546521	0.226883	2.40882	0.0160042	0.138794	-1.2011	-1.77414	-0.961602	-1.79519	-2.23618	-1.66267
ENSMUSG00000010095.13	Slc3a2	4895.74	-0.314034	0.130506	2.40629	0.0161153	0.139491	0.97652	0.800282	0.723869	0.475172	0.492121	0.527136
ENSMUSG00000042197.13	Zfp451	745.771	0.545952	0.226923	-2.40589	0.0161331	0.139491	1.15603	0.633651	1.31415	1.92745	1.28885	1.52634
ENSMUSG00000024736.15	Tmem132a	1805.77	-0.405042	0.168332	2.40621	0.0161192	0.139491	0.84797	1.06838	0.741777	0.473916	0.495781	0.466071
ENSMUSG00000023973.13	Cnpy3	676.055	-0.404561	0.168282	2.40407	0.0162139	0.140049	-0.451562	-0.533152	-0.89203	-1.08798	-0.976568	-1.09305
ENSMUSG00000010830.8	Kdelr3	2295.42	-0.41498	0.172648	2.40362	0.0162337	0.140081	0.666082	0.100122	0.325347	-0.282805	-0.00423101	0.0840757
ENSMUSG00000063065.13	Mapk3	2271.93	-0.350829	0.146133	2.40076	0.016361	0.140499	-1.12166	-1.02947	-1.20917	-1.4559	-1.34069	-1.66668
ENSMUSG00000058793.14	Cds2	1357.94	-0.37497	0.156277	2.39939	0.0164225	0.140499	-0.45904	-0.119989	-0.162054	-0.800878	-0.585007	-0.515151
ENSMUSG00000018474.18	Chd3	3582.86	0.366236	0.152513	-2.40135	0.0163348	0.140499	-1.84305	-2.16537	-2.14818	-1.84546	-1.61965	-1.63705
ENSMUSG00000042029.7	Ncapg2	675.911	0.526276	0.21935	-2.39925	0.0164287	0.140499	1.66401	1.19451	1.67947	2.52892	1.76396	1.88872
ENSMUSG00000025937.6	Lactb2	526.898	0.45046	0.187602	-2.40114	0.0163441	0.140499	0.495987	0.551699	0.892959	1.38898	0.979848	0.986914
ENSMUSG00000038368.16	Focad	665.467	0.297203	0.123801	-2.40064	0.0163662	0.140499	1.07608	0.9258	1.04165	1.27424	1.33477	1.24913
ENSMUSG00000025950.16	Idh1	1614.42	0.367346	0.153053	-2.40013	0.0163893	0.140499	1.11038	0.682224	0.956686	1.36851	1.20711	1.2193
ENSMUSG00000031783.10	Polr2c	1030.12	-0.453367	0.188928	2.39967	0.0164097	0.140499	-2.82235	-2.38327	-2.28607	-3.01538	-2.91491	-2.94555
ENSMUSG00000026335.16	Pam	1188.57	-0.309018	0.128731	2.4005	0.0163727	0.140499	0.517227	0.442597	0.825721	0.225449	0.216302	0.397854
ENSMUSG00000062300.14	Nectin2	2065.57	-0.32687	0.136315	2.39791	0.0164888	0.140734	-0.256725	-0.132093	-0.399474	-0.729797	-0.484958	-0.560357
ENSMUSG00000029621.14	Arpc1a	1376.95	-0.404214	0.16855	2.39818	0.0164766	0.140734	-1.44883	-1.02523	-1.48095	-1.77962	-1.62745	-1.74308
ENSMUSG00000019837.8	Gtf3c6	507.4	0.488301	0.203674	-2.39747	0.0165088	0.140765	-0.509524	-0.432923	-0.65658	0.369421	-0.138734	-0.369419
ENSMUSG00000020411.2	Nipal4	255.08	-0.44676	0.186477	2.39579	0.0165847	0.140995	0.000149428	-0.157538	0.0771047	-0.367911	-0.54699	-0.573137
ENSMUSG00000020677.7	Ddx52	865.324	0.486736	0.203146	-2.396	0.0165753	0.140995	0.314278	0.346654	0.763612	1.33791	0.731628	0.869516
ENSMUSG00000016018.4	Mtrex	2179.65	0.500773	0.208978	-2.3963	0.0165616	0.140995	1.14124	0.848669	1.22635	2.00096	1.37345	1.40931
ENSMUSG00000020388.12	Pdlim4	268.82	-0.456456	0.190562	2.39532	0.0166061	0.141037	0.174335	0.310174	-0.0186838	-0.366998	-0.530306	-0.0765503
ENSMUSG00000053774.9	Ubxn7	796.101	0.518503	0.216555	-2.39433	0.0166509	0.141267	0.604831	0.527054	0.825327	1.60357	0.778409	1.17742
ENSMUSG00000039630.10	Hnrnpu	14002.9	0.355734	0.148594	-2.394	0.0166659	0.141267	1.14787	0.654818	1.07591	1.53244	1.12005	1.25023
ENSMUSG00000028580.15	Pum1	1957.32	0.3419	0.14286	-2.39325	0.0166996	0.141414	1.25572	0.782943	1.05105	1.40258	1.2219	1.41888
ENSMUSG00000038535.17	Zfp280d	367.098	0.53805	0.224886	-2.39254	0.0167321	0.141551	2.03988	1.63084	2.34119	3.03269	2.26977	2.46818
ENSMUSG00000034751.17	Mast4	1629.53	0.594797	0.248733	-2.39131	0.0167885	0.141888	2.00968	0.934406	1.26258	1.76289	1.89178	2.15187
ENSMUSG00000041219.14	Arhgap11a	715.214	0.51247	0.214441	-2.3898	0.0168577	0.142029	0.861822	0.114331	0.916507	1.43499	0.804679	1.1445
ENSMUSG00000020463.15	Ppp4r3b	711.2	0.654008	0.273642	-2.39001	0.0168479	0.142029	1.49421	1.06879	1.62946	2.76208	1.70715	1.84017
ENSMUSG00000021952.16	Xpo4	868.661	0.568791	0.238037	-2.38951	0.0168709	0.142029	1.00274	0.282375	0.99869	1.65481	1.1548	1.16529
ENSMUSG00000054675.5	Tmem119	1057.95	-0.520849	0.21789	2.39042	0.0168291	0.142029	-0.285749	-0.414484	-0.487666	-0.984099	-0.927537	-0.902668
ENSMUSG00000027087.11	Itgav	11897.2	0.481244	0.201596	-2.38717	0.0169789	0.142798	2.71998	2.12759	2.68947	3.1218	2.74688	3.01211
ENSMUSG00000022131.3	Gpr180	674.647	-0.338624	0.141877	2.38674	0.0169986	0.142824	0.0256915	0.114156	0.151247	-0.40707	-0.223725	-0.116766
ENSMUSG00000061111.8	Mcrip1	1170.67	-0.373378	0.156512	2.38562	0.0170503	0.14312	-1.88165	-1.68952	-1.85511	-2.13807	-2.04166	-2.40972
ENSMUSG00000002845.14	Tmem39a	765.907	-0.379829	0.159267	2.38486	0.0170854	0.143275	0.560351	0.307659	0.656854	0.139292	0.0888641	0.110235
ENSMUSG00000040225.15	Prrc2c	5819.8	0.585544	0.245671	-2.38344	0.0171516	0.143413	2.72477	1.70747	2.26449	2.75018	2.46501	3.06227
ENSMUSG00000021963.17	Sap18	1660.55	-0.733131	0.307594	2.38344	0.0171517	0.143413	-4.80115	-3.4467	-4.44854	-4.55855	-5.14466	-5.17163
ENSMUSG00000028990.13	Lzic	654.341	-0.315595	0.132386	2.38389	0.0171307	0.143413	-0.369618	-0.526616	-0.454619	-0.821387	-0.850998	-0.671976
ENSMUSG00000027189.16	Trim44	1097.01	0.446358	0.187497	-2.38061	0.017284	0.143455	-1.15803	-1.30908	-1.29068	-0.505815	-0.953782	-0.932168
ENSMUSG00000022914.17	Brwd1	583.059	0.442809	0.185889	-2.38211	0.0172137	0.143455	0.424057	0.265928	0.634879	1.04795	0.642838	0.953307
ENSMUSG00000028609.6	Magoh	1410.68	0.521401	0.218949	-2.38138	0.017248	0.143455	1.16993	0.813254	0.919916	1.85564	1.22474	1.38178
ENSMUSG00000021022.9	Ppp2r3c	213.737	0.813489	0.341732	-2.38048	0.0172899	0.143455	-0.977482	-0.535056	-0.396022	0.834177	0.011192	-0.0393543
ENSMUSG00000053453.9	Thoc7	749.346	0.449845	0.188834	-2.38222	0.0172086	0.143455	1.36286	1.05423	1.44649	2.18112	1.45543	1.6323
ENSMUSG00000021713.9	Ppwd1	310.496	0.518786	0.217897	-2.38088	0.0172715	0.143455	1.88205	1.39128	2.06341	2.73055	1.91684	2.30907
ENSMUSG00000036561.9	Ppp6r2	271.087	-0.555879	0.23355	2.38013	0.0173064	0.143455	-0.201131	-0.62903	-0.665863	-1.30498	-0.776551	-1.11807
ENSMUSG00000027423.15	Snx5	2755.57	0.556096	0.233606	-2.38049	0.0172896	0.143455	0.402732	0.226284	0.783094	1.50583	0.805426	0.869325
ENSMUSG00000062729.11	Ppox	238.057	-0.529729	0.222388	2.382	0.0172189	0.143455	-0.712975	-0.191052	-0.50397	-1.00031	-0.709574	-1.20639
ENSMUSG00000055319.8	Sec23ip	2704.96	0.308275	0.129575	-2.37913	0.0173538	0.143561	1.36412	0.940582	1.14398	1.413	1.32283	1.5651
ENSMUSG00000028869.13	Gnl2	1685.5	0.350276	0.147233	-2.37906	0.0173568	0.143561	0.527881	0.669425	0.657588	1.05539	0.766664	1.04611
ENSMUSG00000029534.17	St7	345.398	-0.398631	0.167577	2.3788	0.0173691	0.143561	0.416975	0.541011	0.624602	-0.158055	0.142779	0.349488
ENSMUSG00000043872.14	Zmym1	248.791	0.543877	0.228797	-2.37712	0.0174483	0.144078	2.39262	1.71486	2.21788	2.95903	2.27544	2.72472
ENSMUSG00000030861.15	Acadsb	776.287	0.401137	0.168801	-2.37639	0.0174829	0.144088	0.875375	0.953826	1.15699	1.62133	1.19495	1.3984
ENSMUSG00000038497.7	Tmco3	528.934	-0.364932	0.153564	2.37641	0.0174818	0.144088	-0.489217	-0.099331	-0.173399	-0.722531	-0.650558	-0.505274
ENSMUSG00000054364.5	Rhob	3481.32	-0.451263	0.189927	2.37597	0.0175027	0.144113	-0.9203	-0.546465	-0.360325	-1.13097	-1.06256	-1.07144
ENSMUSG00000034187.18	Nsf	1418.75	0.233353	0.098264	-2.37475	0.0175607	0.144402	0.0615497	0.0515122	0.102888	0.30909	0.217932	0.346772
ENSMUSG00000056310.14	Tyw1	572.657	-0.379077	0.159667	2.37418	0.017588	0.144402	-0.0483588	-0.023744	-0.0187184	-0.452245	-0.638898	-0.277818
ENSMUSG00000033014.12	Trim33	680.187	0.635381	0.267594	-2.37442	0.0175765	0.144402	1.68623	0.797348	1.40471	2.38045	1.48922	1.95981
ENSMUSG00000020253.15	Ppm1m	482.282	-0.514159	0.21666	2.37312	0.0176385	0.144564	-2.08722	-1.8124	-2.00916	-2.47579	-2.09554	-2.96523
ENSMUSG00000008398.15	Elk3	1408.97	-0.288753	0.121743	2.37182	0.0177007	0.144564	-0.183435	-0.461627	-0.347303	-0.681903	-0.774222	-0.486569
ENSMUSG00000025173.13	Wdr45b	1474.87	-0.483664	0.2041	2.36974	0.0178005	0.144564	-1.71695	-1.45555	-1.22714	-2.02338	-2.08717	-1.83539
ENSMUSG00000040389.15	Wdr47	335.958	0.537088	0.2266	-2.3702	0.0177784	0.144564	1.0726	1.04462	1.77391	2.12682	1.56445	1.89793
ENSMUSG00000037347.7	Chst7	269.568	-0.612237	0.258204	2.37113	0.0177337	0.144564	-0.118908	0.113985	0.511506	-0.549872	-0.53107	-0.357898
ENSMUSG00000002393.14	Nr2f6	555.608	-0.791554	0.334084	2.36932	0.0178207	0.144564	-1.59097	-1.37123	-0.708791	-2.27087	-1.87368	-2.13731
ENSMUSG00000052512.17	Nav2	1226.73	0.431442	0.181878	-2.37215	0.0176848	0.144564	1.38511	1.24111	1.20875	1.5162	1.63294	1.94377
ENSMUSG00000052854.15	Nrk	650.628	0.726057	0.306361	-2.36994	0.017791	0.144564	2.69294	1.38139	2.2017	3.20496	2.37362	2.83105
ENSMUSG00000027823.9	Gmps	2616.37	0.427979	0.180453	-2.37169	0.0177069	0.144564	0.746851	0.680687	0.892	1.5688	0.986334	1.07254
ENSMUSG00000021706.14	Zfyve16	720.527	0.459963	0.194027	-2.37061	0.0177588	0.144564	1.75873	1.5647	1.97196	2.67083	1.99562	2.07389
ENSMUSG00000024259.9	Slc25a46	687.318	0.511201	0.215728	-2.36965	0.017805	0.144564	0.987636	0.714087	1.16676	2.00103	1.15862	1.31952
ENSMUSG00000053730.15	Tmem39b	292.671	-0.504238	0.212532	2.37253	0.0176666	0.144564	1.24766	0.753376	0.98527	0.315673	0.757681	0.282378
ENSMUSG00000022105.6	Rb1	397.987	0.599157	0.252892	-2.36922	0.0178255	0.144564	1.34985	0.968081	1.34574	2.46753	1.43708	1.71074
ENSMUSG00000078622.8	Ccdc47	1177.6	0.375241	0.15842	-2.36864	0.0178535	0.144655	1.32321	1.16945	1.27786	1.80271	1.31078	1.76398
ENSMUSG00000033769.16	Exoc6b	766.667	0.381736	0.16127	-2.36707	0.0179297	0.145137	0.188949	-0.175857	0.326341	0.661863	0.28378	0.520853
ENSMUSG00000062901.3	Klhl24	310.824	0.508124	0.214702	-2.36664	0.0179501	0.145166	1.09751	0.973965	1.41789	1.84229	1.36691	1.82621
ENSMUSG00000037572.17	Wdhd1	534.182	0.402702	0.170343	-2.36406	0.018076	0.146046	1.07045	0.349808	0.974809	1.24915	1.08122	1.24386
ENSMUSG00000041096.13	Tspyl2	528.846	0.347435	0.146995	-2.36358	0.0180992	0.146097	0.152944	-0.0934622	-0.0855179	0.295061	0.101577	0.507711
ENSMUSG00000043962.16	Thrap3	2410.44	0.301562	0.127632	-2.36274	0.0181406	0.146295	-1.12063	-1.53524	-1.2435	-1.04562	-0.927303	-1.07152
ENSMUSG00000068744.12	Psrc1	1629.73	-0.311873	0.132047	2.36183	0.0181848	0.146377	-0.464574	-0.289066	-0.452521	-0.734955	-0.602684	-0.844749
ENSMUSG00000029802.13	Abcg2	2522.98	0.423111	0.179128	-2.36205	0.018174	0.146377	1.31399	1.0399	1.27446	1.82324	1.47491	1.59176
ENSMUSG00000022360.8	Atad2	1930.97	0.580306	0.246234	-2.35673	0.0184367	0.146843	2.34848	1.30391	2.18284	2.8883	2.16499	2.53633
ENSMUSG00000024099.15	Ndufv2	2282.06	0.342324	0.145281	-2.35629	0.0184586	0.146843	0.0653305	0.0977071	0.11779	0.561177	0.347733	0.374714
ENSMUSG00000025241.16	Fyco1	583.449	0.36544	0.154874	-2.35959	0.0182949	0.146843	0.918317	0.855638	0.857523	1.37049	1.19569	1.14724
ENSMUSG00000041740.16	Rnf10	4178.12	-0.314906	0.133651	2.35618	0.0184639	0.146843	-2.82808	-2.8669	-3.01185	-3.33561	-3.13466	-3.1957
ENSMUSG00000002871.14	Tpra1	301.212	-0.515113	0.218465	2.35787	0.01838	0.146843	-0.0283994	0.203848	-0.0458184	-0.444754	-0.822202	-0.342663
ENSMUSG00000040236.4	Trappc5	760.933	-0.340954	0.144557	2.35862	0.0183431	0.146843	-0.202868	-0.0117429	-0.230347	-0.596083	-0.32199	-0.592062
ENSMUSG00000042462.4	Dctpp1	892.082	-0.425966	0.180777	2.35631	0.0184577	0.146843	-0.759844	-0.750567	-0.906681	-1.13839	-1.30548	-1.33219
ENSMUSG00000008318.10	Relt	293.713	-0.60922	0.258354	2.35808	0.0183696	0.146843	-1.74203	-0.887201	-1.11831	-2.02814	-1.38293	-2.09094
ENSMUSG00000028292.14	Rars2	425.354	0.393714	0.167086	-2.35635	0.0184554	0.146843	1.16383	0.941164	1.24938	1.67193	1.27387	1.54846
ENSMUSG00000031782.15	Coq9	541.704	-0.415539	0.176195	2.35841	0.0183536	0.146843	-1.0575	-0.955159	-1.09274	-1.42446	-1.29603	-1.65092
ENSMUSG00000007812.16	Zfp655	472.214	0.597228	0.253266	-2.3581	0.0183685	0.146843	0.834372	0.414865	0.849798	1.66566	0.948342	1.32807
ENSMUSG00000025742.5	Prps2	733.071	0.412369	0.174863	-2.35824	0.0183618	0.146843	0.420233	0.655884	0.605598	1.17503	0.983328	0.808573
ENSMUSG00000005881.13	Ergic3	2280.02	-0.325583	0.138077	2.35798	0.0183747	0.146843	0.0782252	0.10651	-0.0832575	-0.3976	-0.371071	-0.170661
ENSMUSG00000020130.9	Tbc1d15	1421.87	0.456238	0.193713	-2.35523	0.0185113	0.147085	1.17344	0.962791	1.29422	2.04357	1.44273	1.36478
ENSMUSG00000021116.10	Eif2s1	2634.97	0.424685	0.180386	-2.35432	0.0185568	0.1471	-0.936167	-0.940053	-0.966215	-0.157972	-0.751754	-0.641661
ENSMUSG00000019558.14	Slc6a8	1352.72	-0.352241	0.149583	2.35481	0.0185319	0.1471	-1.20627	-1.20177	-1.28644	-1.72025	-1.41864	-1.61149
ENSMUSG00000029681.12	Bcl7b	452.017	-0.400602	0.170167	2.35416	0.0185644	0.1471	-0.962861	-0.815937	-0.829874	-1.22683	-1.37571	-1.34018
ENSMUSG00000025371.12	Chmp6	513.08	-0.495154	0.210472	2.35259	0.0186431	0.14735	-1.85369	-1.83388	-2.22226	-2.39791	-2.30325	-2.77616
ENSMUSG00000062908.12	Acadm	563.176	0.376929	0.160223	-2.35253	0.018646	0.14735	0.0462379	-0.0636601	0.031377	0.463313	0.317294	0.371211
ENSMUSG00000022564.7	Grina	1947.68	-0.379612	0.161365	2.35251	0.0186472	0.14735	-0.435141	-0.16264	-0.335817	-0.615184	-0.65814	-0.822296
ENSMUSG00000027091.14	Zc3h15	1189.41	0.478151	0.203294	-2.35202	0.0186719	0.147411	-1.17944	-1.43756	-1.00677	-0.350834	-0.920519	-0.868471
ENSMUSG00000028291.7	Akirin2	1107.81	-0.328342	0.139646	2.35124	0.018711	0.147584	0.210896	0.0782182	0.38895	-0.167882	-0.332245	0.0994229
ENSMUSG00000020261.15	Slc36a1	335.22	-0.440651	0.187461	2.35062	0.0187422	0.147695	-0.55479	-0.874357	-0.873485	-1.26503	-1.25688	-1.18271
ENSMUSG00000018547.8	Pip4k2b	1358.85	-0.265594	0.113078	2.34878	0.0188352	0.148288	-1.05027	-1.0789	-1.07906	-1.32878	-1.50777	-1.26209
ENSMUSG00000026240.12	Cops7b	628.415	-0.43112	0.183576	2.34845	0.0188518	0.148288	-0.722778	-0.663919	-0.843448	-1.08705	-1.1323	-1.39116
ENSMUSG00000024970.5	Spindoc	690.897	-0.392048	0.167068	2.34664	0.0189435	0.148874	-0.944756	-0.854244	-0.696633	-1.23392	-1.26386	-1.24219
ENSMUSG00000038102.15	Trappc11	964.896	0.306417	0.13067	-2.34497	0.0190284	0.149405	1.07895	1.02826	0.934945	1.26559	1.17038	1.45114
ENSMUSG00000037730.13	Mynn	333.073	0.58795	0.250862	-2.34372	0.0190927	0.149773	0.643275	0.966235	1.28934	2.06342	1.10805	1.62661
ENSMUSG00000037416.13	Dmxl1	780.477	0.658793	0.281313	-2.34185	0.0191887	0.149845	2.54131	1.89007	2.75384	3.75039	2.50916	3.01835
ENSMUSG00000074794.10	Arrdc3	223.165	0.539889	0.230507	-2.34218	0.0191713	0.149845	0.386997	0.416296	0.542932	1.2496	0.793444	1.03709
ENSMUSG00000020180.10	Snrpd3	2315.17	0.319712	0.136468	-2.34276	0.0191419	0.149845	0.846079	0.869118	0.755312	1.28631	1.01994	1.07293
ENSMUSG00000024989.15	Cep55	492.694	0.52441	0.223903	-2.34213	0.0191739	0.149845	1.15816	0.910738	1.46512	2.21086	1.4124	1.58057
ENSMUSG00000039168.15	Dap	3297.37	-0.366634	0.156541	2.3421	0.0191756	0.149845	-0.542448	-0.8939	-0.712713	-1.19519	-1.17089	-0.928975
ENSMUSG00000034951.10	Cog7	561.029	0.328029	0.1401	-2.3414	0.0192117	0.149889	0.813655	0.439082	0.594295	0.803769	1.05599	0.918184
ENSMUSG00000029063.16	Nadk	3516.48	-0.355484	0.15193	2.33979	0.0192947	0.150401	-2.54477	-2.52609	-2.24521	-2.91827	-2.76817	-2.74489
ENSMUSG00000039103.12	Nexn	908.88	0.473413	0.202426	-2.3387	0.0193509	0.150422	1.00786	0.689867	0.977294	1.75562	1.09715	1.28488
ENSMUSG00000038861.14	Pi4kb	891.673	-0.285017	0.121843	2.33921	0.0193246	0.150422	0.365192	0.323301	0.492365	0.0285172	0.0792001	0.166556
ENSMUSG00000037211.12	Spry1	794.256	-0.417544	0.178561	2.33839	0.0193671	0.150422	-0.197429	-0.578056	-0.270657	-0.876581	-0.767804	-0.655939
ENSMUSG00000014602.15	Kif1a	3573.77	0.43859	0.187516	-2.33895	0.0193382	0.150422	-0.147874	-0.147266	-0.52295	0.00598448	0.206534	0.269627
ENSMUSG00000020733.3	Slc9a3r1	608.642	-0.37513	0.160493	2.33735	0.0194209	0.150704	-1.11865	-0.971204	-1.17814	-1.50548	-1.44182	-1.41123
ENSMUSG00000027384.6	Ndufaf5	287.986	0.420856	0.180115	-2.33659	0.0194603	0.150739	-0.438558	-0.614159	-0.369885	-0.028868	-0.310804	0.0752825
ENSMUSG00000030410.16	Dmwd	1410.31	-0.413661	0.177019	2.33681	0.0194489	0.150739	-1.48051	-1.26228	-1.53516	-1.98731	-1.43132	-2.10144
ENSMUSG00000046791.8	Riox1	350.672	-0.463352	0.198517	2.33407	0.0195923	0.151625	0.156327	0.276227	0.15466	-0.172109	-0.340932	-0.323382
ENSMUSG00000020576.10	Nbas	1230.6	0.366678	0.157155	-2.33323	0.019636	0.151827	0.971421	0.447269	0.749719	0.949248	1.19615	1.03904
ENSMUSG00000029061.2	Mmp23	589.51	-0.401607	0.172183	2.33244	0.0196776	0.151985	-0.146192	0.0317308	-0.103356	-0.369229	-0.260135	-0.82105
ENSMUSG00000017837.12	Nkiras2	827.36	-0.43932	0.188374	2.33217	0.0196916	0.151985	-1.95619	-1.5458	-1.72735	-2.15465	-1.99945	-2.40123
ENSMUSG00000021390.6	Ogn	1244.27	0.676101	0.289983	-2.33152	0.0197258	0.152044	3.13449	1.86687	2.81281	3.81098	2.86473	3.21403
ENSMUSG00000061479.15	Snrpa	1957.83	-0.346516	0.148633	2.33136	0.0197346	0.152044	-1.09885	-1.0284	-1.15604	-1.42087	-1.47128	-1.49625
ENSMUSG00000020530.14	Ggnbp2	1462.55	0.491755	0.210968	-2.33094	0.0197564	0.152077	0.857174	0.780097	1.29943	1.88036	1.17167	1.41388
ENSMUSG00000032557.13	Uba5	1039.93	0.329637	0.141486	-2.32983	0.0198154	0.152355	0.0173822	0.10816	0.20697	0.567921	0.332399	0.421707
ENSMUSG00000020265.16	Sumo3	1767.58	-0.364368	0.156409	2.32959	0.0198279	0.152355	-3.193	-3.00472	-3.26601	-3.562	-3.47471	-3.566
ENSMUSG00000021938.12	Pspc1	724.411	0.37684	0.16183	-2.32862	0.019879	0.152612	0.563681	0.490428	0.448851	1.13012	0.699112	0.824342
ENSMUSG00000045103.19	Dmd	623.804	0.503155	0.216123	-2.32809	0.0199071	0.152692	1.57873	1.59646	1.80755	2.58495	1.89392	2.1327
ENSMUSG00000032459.9	Mrps22	810.551	0.395086	0.169842	-2.3262	0.0200078	0.153056	1.387	1.08515	1.50545	1.93315	1.4861	1.72884
ENSMUSG00000032324.11	Tspan3	2358.87	-0.33582	0.144355	2.32635	0.0199998	0.153056	0.14585	0.361276	0.60166	-0.12509	-0.0309001	0.195902
ENSMUSG00000067274.10	Rplp0	38790.7	0.280474	0.120549	-2.32664	0.0199846	0.153056	-4.22565	-4.08556	-4.28108	-4.05005	-3.88104	-3.86628
ENSMUSG00000055943.5	Emc7	1437.65	-0.300305	0.12913	2.3256	0.0200397	0.153165	0.547913	0.606445	0.445222	0.187177	0.0873491	0.342669
ENSMUSG00000022263.10	Trio	2413.3	0.40512	0.174258	-2.32483	0.0200811	0.153345	0.963632	0.230481	0.582835	0.955434	0.944354	0.994252
ENSMUSG00000041406.14	BC055324	372.774	0.366423	0.157669	-2.324	0.0201254	0.153511	0.970783	1.09584	1.33278	1.61156	1.47682	1.40672
ENSMUSG00000061306.16	Slc38a10	2339.97	-0.320774	0.13814	2.32209	0.0202283	0.153511	-0.542994	-0.55816	-0.680537	-1.16162	-0.739833	-0.86322
ENSMUSG00000037531.8	Mrpl47	450.324	0.551478	0.237442	-2.32258	0.0202018	0.153511	0.607453	0.372954	0.562995	1.6896	0.535957	0.985493
ENSMUSG00000041763.14	Tpp2	4905.64	0.527181	0.226951	-2.32288	0.0201856	0.153511	1.59217	1.08125	1.63673	2.44972	1.6642	1.82231
ENSMUSG00000039219.18	Arid4b	586.582	0.463633	0.199577	-2.32308	0.0201749	0.153511	2.24005	1.4941	1.99535	2.54011	2.01245	2.48334
ENSMUSG00000022336.3	Eif3e	4461.01	0.557155	0.239951	-2.32196	0.0202353	0.153511	-0.463345	-0.446497	-0.231077	0.786893	-0.173019	0.0149806
ENSMUSG00000026134.11	Prim2	679.076	0.33579	0.144626	-2.32177	0.0202452	0.153511	0.491962	0.0101909	0.369488	0.630582	0.603252	0.593929
ENSMUSG00000030341.17	Tnfrsf1a	1698.91	-0.325956	0.140287	2.32348	0.0201532	0.153511	-0.616103	-0.79682	-0.835903	-1.22993	-1.01308	-1.02507
ENSMUSG00000068039.13	Tcp1	11420.3	0.290136	0.125055	-2.32007	0.0203369	0.154071	0.473708	0.389095	0.582489	0.918861	0.654883	0.716643
ENSMUSG00000021958.5	Pinx1	398.174	0.41537	0.179096	-2.31926	0.0203811	0.154136	0.488212	0.356289	0.182973	0.98905	0.426519	0.759607
ENSMUSG00000002778.14	Kdelr1	4445.18	-0.240555	0.103713	2.31944	0.0203713	0.154136	0.4818	0.298175	0.427906	0.0673632	0.218093	0.158673
ENSMUSG00000037536.14	Fbxo34	284.49	-0.441337	0.190386	2.31812	0.0204428	0.154303	-1.16126	-1.17839	-0.737461	-1.6499	-1.2538	-1.456
ENSMUSG00000050213.6	Snip1	490.357	-0.435888	0.188025	2.31824	0.0204363	0.154303	-0.545099	-0.406657	-0.0806347	-0.556381	-1.15412	-0.780372
ENSMUSG00000025521.15	Tmem192	442.067	-0.458593	0.197852	2.31786	0.0204569	0.154303	-1.09333	-0.913312	-1.03252	-1.37629	-1.62689	-1.55695
ENSMUSG00000021549.14	Rasa1	1572.88	0.638496	0.275653	-2.3163	0.0205417	0.154807	1.85119	0.961275	1.8002	2.69497	1.82302	2.06795
ENSMUSG00000039835.16	Nhsl1	388.518	0.453243	0.195754	-2.31537	0.0205925	0.155054	1.26053	0.874738	0.998331	1.38374	1.19662	1.8182
ENSMUSG00000024769.7	Cdc42bpg	801.467	0.438186	0.189323	-2.31449	0.0206409	0.15526	-0.710488	-0.447616	-0.786484	-0.251078	-0.25015	-0.127431
ENSMUSG00000031950.7	Gabarapl2	486.32	-1.35475	0.585405	2.31422	0.0206557	0.15526	-5.62811	-6.92257	-5.66235	-6.89949	#NAME?	-7.14706
ENSMUSG00000057421.12	Las1l	1648.65	0.294738	0.127387	-2.31373	0.0206825	0.155326	0.420353	0.389932	0.30598	0.774477	0.652144	0.546351
ENSMUSG00000020608.7	Smc6	1430.62	0.554585	0.239807	-2.31263	0.0207432	0.155646	1.1549	0.713726	1.26205	2.13409	1.23792	1.52449
ENSMUSG00000015745.9	Plekho1	1197.61	-0.477379	0.206497	2.31179	0.0207892	0.155856	-1.89961	-1.76883	-2.07623	-2.45013	-2.37802	-2.37398
ENSMUSG00000041408.18	Wapl	1196.17	0.526123	0.227634	-2.31127	0.0208179	0.155858	1.74644	0.955341	1.60264	2.23144	1.60953	2.03665
ENSMUSG00000031399.15	Fam3a	292.053	-0.409621	0.177238	2.31113	0.0208257	0.155858	-0.274252	-0.0631451	-0.275851	-0.61505	-0.559017	-0.719388
ENSMUSG00000038708.10	Golga4	848.82	0.416592	0.180368	-2.30968	0.0209061	0.156096	0.866662	0.275092	0.708573	1.21005	0.73651	1.08087
ENSMUSG00000035274.13	Tpbg	1411.74	-0.389978	0.16882	2.31003	0.0208865	0.156096	2.59667	2.33736	2.51102	2.06222	2.00932	2.16255
ENSMUSG00000045210.8	Vcpip1	928.351	0.475416	0.205845	-2.30958	0.0209117	0.156096	2.06785	1.53711	2.01727	2.66868	2.09535	2.27574
ENSMUSG00000064302.13	Clasp1	2095.99	0.329142	0.142557	-2.30885	0.0209518	0.156213	0.924398	0.446024	0.680579	1.02194	0.821609	1.1105
ENSMUSG00000069020.9	Urm1	791.787	-0.384562	0.166614	2.30811	0.0209933	0.156213	-1.4563	-1.12547	-1.30672	-1.88089	-1.36264	-1.79329
ENSMUSG00000035885.5	Cox8a	3516.3	-0.412287	0.178619	2.3082	0.0209883	0.156213	0.0550057	0.328622	0.565584	-0.060725	-0.138326	-0.165677
ENSMUSG00000026683.14	Nuf2	586.999	0.559691	0.242502	-2.30799	0.0209998	0.156213	0.947681	0.292426	0.944861	1.76406	0.908815	1.19653
ENSMUSG00000021595.18	Nsun2	3092.89	0.278795	0.120832	-2.3073	0.0210379	0.156309	0.046435	-0.137805	-0.000396986	0.392687	0.141066	0.178984
ENSMUSG00000019802.13	Sec63	3490.6	0.411545	0.178391	-2.30699	0.0210555	0.156309	1.70554	1.08985	1.68765	2.04041	1.61977	2.01957
ENSMUSG00000014195.15	Dnajc7	2005.89	0.305257	0.13233	-2.30678	0.0210671	0.156309	0.509374	0.456841	0.659438	0.950313	0.701684	0.845832
ENSMUSG00000031819.13	Emc8	1041.44	-0.329517	0.142873	2.30637	0.0210902	0.156346	-1.19453	-1.02182	-1.11972	-1.43528	-1.4228	-1.52767
ENSMUSG00000003119.14	Cdk12	831.989	0.439057	0.190509	-2.30465	0.0211863	0.156783	1.27345	0.824428	1.3035	1.6932	1.17313	1.7818
ENSMUSG00000021823.10	Vcl	17991.4	0.316702	0.137437	-2.30434	0.0212036	0.156783	2.27739	2.06886	2.16778	2.59702	2.35768	2.47289
ENSMUSG00000030102.11	Itpr1	966.476	0.413805	0.179544	-2.30476	0.02118	0.156783	1.83952	1.35737	1.75157	2.14654	1.89576	2.07443
ENSMUSG00000045427.13	Hnrnph2	884.981	0.492752	0.213995	-2.30264	0.0212993	0.157243	-0.283961	-0.77793	-0.381136	0.387069	-0.294437	-0.0531701
ENSMUSG00000021377.15	Dek	1031.92	0.584724	0.253943	-2.30258	0.0213023	0.157243	1.1542	0.529304	1.37177	2.10685	1.13583	1.6467
ENSMUSG00000039831.16	Arhgap29	1522.67	0.59038	0.256647	-2.30036	0.0214277	0.157899	0.333741	-0.123581	0.416078	1.47792	0.408957	0.63871
ENSMUSG00000029505.17	Ep400	1858.39	0.396355	0.172295	-2.30044	0.0214231	0.157899	0.982905	0.369437	0.652612	0.884416	0.958759	1.27936
ENSMUSG00000039735.16	Fnbp1l	723.645	0.576396	0.250633	-2.29976	0.0214621	0.158017	0.755338	0.401997	0.901796	1.75534	1.02772	1.13718
ENSMUSG00000019978.16	Epb41l2	3653.67	0.299138	0.130117	-2.29899	0.0215057	0.158147	0.657592	0.31325	0.492803	0.833468	0.580316	0.887336
ENSMUSG00000028986.12	Klhl7	524.602	0.543747	0.236557	-2.29859	0.0215282	0.158147	0.974263	1.20364	1.49168	2.38318	1.48972	1.55744
ENSMUSG00000030339.7	Ltbr	1590.59	-0.344887	0.15005	2.29848	0.0215347	0.158147	-1.75587	-1.48451	-1.69406	-2.05813	-1.78825	-2.13953
ENSMUSG00000023175.15	Bsg	11547.2	-0.260809	0.113491	2.29806	0.0215586	0.158188	0.155565	0.25812	0.130155	-0.170334	-0.0870475	-0.0180225
ENSMUSG00000037166.5	Ppp1r14a	371.197	-0.651347	0.283553	2.29709	0.0216136	0.158457	-0.416828	-0.265159	0.457652	-0.677497	-0.610507	-1.04362
ENSMUSG00000020415.16	Pttg1	402.658	-0.36999	0.161135	2.29615	0.0216675	0.158717	0.391221	0.745616	0.467235	0.168237	0.128315	0.101423
ENSMUSG00000006262.15	Mob1b	750.759	0.590194	0.257215	-2.29456	0.0217586	0.159249	1.07539	0.632916	1.36545	2.06232	1.3614	1.48832
ENSMUSG00000034327.17	Kctd9	539.189	0.394559	0.172004	-2.2939	0.0217964	0.159391	0.478052	0.159078	0.621087	1.03075	0.527413	0.880728
ENSMUSG00000025153.9	Fasn	16383.2	0.345619	0.150717	-2.29317	0.0218383	0.159562	0.814158	0.553343	0.455106	0.842948	1.04829	0.920653
ENSMUSG00000030754.9	Copb1	6946.39	0.415306	0.181191	-2.29209	0.0219003	0.15988	1.55582	1.30266	1.68801	2.27636	1.77759	1.77262
ENSMUSG00000022971.18	Ifnar2	426.229	-0.374139	0.163297	2.29116	0.0219541	0.160057	0.243897	0.113584	0.611129	-0.0651139	-0.0952508	-0.0410903
ENSMUSG00000024807.18	Syvn1	1256.51	-0.363614	0.158712	2.29103	0.0219617	0.160057	1.34394	1.07803	1.16594	0.668167	0.904036	0.875365
ENSMUSG00000026425.15	Srgap2	918.147	0.424668	0.185462	-2.28979	0.0220338	0.160447	1.00624	0.364018	0.679538	0.980236	1.04832	1.2171
ENSMUSG00000034932.4	Mrpl54	1165.35	-0.324212	0.141669	2.28852	0.0221072	0.16071	-1.1506	-1.03336	-1.14782	-1.49426	-1.3505	-1.50909
ENSMUSG00000032333.6	Stoml1	248.931	-0.518579	0.226572	2.2888	0.022091	0.16071	-1.29341	-0.801187	-1.10286	-1.8364	-1.49208	-1.41167
ENSMUSG00000029126.7	Nsg1	1024.02	-0.36123	0.157889	2.28788	0.0221444	0.160845	0.298282	0.0785192	0.283927	-0.238669	-0.161385	-0.0716436
ENSMUSG00000000594.7	Gm2a	349.453	-0.392258	0.171507	2.28712	0.0221886	0.160895	-0.072654	0.239875	0.058248	-0.375528	-0.46375	-0.149541
ENSMUSG00000042473.8	Tbc1d8b	1027.43	0.687484	0.300559	-2.28735	0.0221752	0.160895	2.49714	1.92145	2.42328	3.85649	2.55429	2.77072
ENSMUSG00000026219.14	Trip12	5646.12	0.439485	0.192297	-2.28545	0.0222865	0.161334	1.21036	0.72065	1.17387	1.81246	1.20969	1.39238
ENSMUSG00000027070.14	Lrp2	918.492	0.47493	0.207789	-2.28564	0.0222756	0.161334	3.49289	3.43899	3.48241	3.54062	4.03266	4.22637
ENSMUSG00000037286.15	Stag1	898.365	0.655166	0.286818	-2.28425	0.0223566	0.16157	0.993541	0.490165	1.28621	2.3461	1.1009	1.46581
ENSMUSG00000061778.10	Mospd2	743.803	0.65876	0.288376	-2.28438	0.0223493	0.16157	1.2975	1.00797	1.57935	2.72637	1.52996	1.80226
ENSMUSG00000028409.11	Smu1	2877.17	0.277847	0.121713	-2.28282	0.0224411	0.162046	0.457568	0.471874	0.444218	0.866385	0.684206	0.630551
ENSMUSG00000014498.9	Ankrd52	3700.78	0.309875	0.135849	-2.28102	0.0225471	0.162292	-0.195125	-0.266537	-0.428933	-0.0139045	0.0472258	-0.0266695
ENSMUSG00000031093.14	Dock11	722.132	0.633261	0.277628	-2.28097	0.0225505	0.162292	2.26901	1.22819	1.77754	3.04537	2.07549	2.06854
ENSMUSG00000031928.15	Mre11a	629.971	0.379613	0.166421	-2.28104	0.0225459	0.162292	0.518876	0.0683749	0.194706	0.900166	0.405151	0.558318
ENSMUSG00000021288.19	Klc1	2981.16	-0.283508	0.124267	2.28145	0.0225219	0.162292	-0.551466	-0.454102	-0.603928	-0.879163	-0.76502	-0.852099
ENSMUSG00000049680.17	Urgcp	752.087	-0.303334	0.13301	2.28053	0.0225761	0.162341	-0.714346	-0.470837	-0.573852	-0.909104	-0.81271	-0.975324
ENSMUSG00000030611.10	Mrps11	625.864	-0.357341	0.156767	2.27944	0.022641	0.162631	-0.378924	-0.189186	-0.28936	-0.794336	-0.538575	-0.653324
ENSMUSG00000038250.9	Usp38	620.214	0.355839	0.156123	-2.27922	0.0226541	0.162631	1.42687	0.970064	1.30818	1.57563	1.42842	1.74487
ENSMUSG00000037887.11	Dusp8	218.657	-0.529122	0.232231	2.27843	0.022701	0.162795	-1.10442	-1.05693	-1.20794	-1.91181	-1.78403	-1.3067
ENSMUSG00000021597.16	Slf1	407.207	0.746407	0.32763	-2.2782	0.0227148	0.162795	1.67007	1.57495	1.75263	3.32757	1.85845	2.31523
ENSMUSG00000060510.14	Zfp266	944.202	0.549672	0.24134	-2.27759	0.0227511	0.162921	1.74462	1.26364	1.80352	2.7526	1.79346	2.02214
ENSMUSG00000026566.15	Mpzl1	921.028	-0.283565	0.124575	2.27625	0.0228311	0.163116	-0.00743173	0.0201268	0.080848	-0.354081	-0.28592	-0.163229
ENSMUSG00000049086.8	Bmyc	191.035	-0.4738	0.208156	2.27618	0.0228351	0.163116	1.8825	1.53927	1.55665	1.38014	1.06848	0.990279
ENSMUSG00000024542.9	Cep192	704.983	0.547613	0.240562	-2.27639	0.0228226	0.163116	1.67603	1.04269	1.78366	2.58812	1.65035	1.97006
ENSMUSG00000028530.14	Jak1	5061.72	0.282821	0.12427	-2.27586	0.0228546	0.16312	0.598141	0.340956	0.544868	0.951377	0.60362	0.726669
ENSMUSG00000028955.3	Vamp3	1141.16	0.270008	0.118672	-2.27525	0.0228911	0.163246	-1.95189	-1.91696	-1.80061	-1.66526	-1.63893	-1.60119
ENSMUSG00000026411.17	Tmem9	954.686	-0.380281	0.167172	2.27478	0.0229189	0.163309	-0.442844	-0.091568	-0.403935	-0.783264	-0.551184	-0.779259
ENSMUSG00000022637.11	Cblb	746.293	0.389948	0.171594	-2.2725	0.0230563	0.164153	1.20211	0.496675	0.734866	1.16886	1.10423	1.22559
ENSMUSG00000027620.16	Rbm39	2121.6	0.444584	0.19568	-2.27199	0.0230869	0.164235	1.23205	0.614787	1.13189	1.75059	1.1741	1.39763
ENSMUSG00000041328.16	Pcf11	647.87	0.504564	0.222194	-2.27083	0.0231576	0.16448	1.24227	0.794632	1.5485	2.10871	1.28291	1.68488
ENSMUSG00000028069.16	Gpatch4	434.05	0.419488	0.184732	-2.27079	0.0231595	0.16448	-1.08326	-0.859105	-1.34391	-0.887604	-0.667075	-0.54242
ENSMUSG00000021357.14	Exoc2	1490.17	0.384315	0.169323	-2.26972	0.0232249	0.164809	0.795807	0.803875	1.02601	1.55779	1.13362	1.10563
ENSMUSG00000035473.10	Galm	330.547	0.369845	0.162998	-2.26901	0.0232678	0.164978	-0.0441089	0.210228	0.0460539	0.517528	0.281119	0.465692
ENSMUSG00000021911.16	Parg	596.882	0.525141	0.231544	-2.26799	0.0233296	0.16528	1.0566	0.701505	0.845939	1.92983	1.01981	1.32367
ENSMUSG00000022114.5	Spry2	999.099	-0.321501	0.141903	2.26564	0.0234732	0.166025	0.768403	0.273264	0.823178	0.230398	0.220403	0.399997
ENSMUSG00000013662.6	Atad1	1532.5	0.476099	0.210114	-2.26591	0.023457	0.166025	1.48678	1.49075	1.79608	2.47985	1.74395	2.04704
ENSMUSG00000001441.13	Npepps	3377.88	0.213305	0.0942226	-2.26384	0.0235837	0.166126	0.494618	0.328907	0.591593	0.668174	0.634649	0.712123
ENSMUSG00000025047.9	Pdcd11	2315.45	0.377911	0.166917	-2.26406	0.0235702	0.166126	0.713733	0.412478	0.443653	0.648205	0.931932	1.08259
ENSMUSG00000045482.16	Trrap	3408.34	0.400261	0.17678	-2.26418	0.0235633	0.166126	1.26388	0.823805	0.882576	1.20715	1.33471	1.56864
ENSMUSG00000002015.5	Bcap31	3324.29	-0.256246	0.113146	2.26474	0.0235284	0.166126	0.379031	0.585796	0.395213	0.151375	0.14331	0.238063
ENSMUSG00000032525.15	Nktr	659.057	0.468294	0.206811	-2.26436	0.0235519	0.166126	0.875401	0.320638	0.759949	1.30925	0.80504	1.229
ENSMUSG00000027510.17	Rbm38	501.734	-0.480874	0.212479	2.26316	0.023626	0.166288	-0.131371	-0.0108989	0.158568	-0.486974	-0.587817	-0.435654
ENSMUSG00000005374.13	Tbl2	491.078	-0.465536	0.20579	2.26219	0.0236856	0.166572	-0.219017	-0.357762	-0.503951	-0.921711	-0.754733	-0.882166
ENSMUSG00000022051.15	Bnip3l	571.04	0.698919	0.30908	-2.26129	0.0237414	0.166828	-3.91227	-3.17387	-3.01438	-2.79195	-2.75934	-2.4714
ENSMUSG00000032826.19	Ank2	451.815	0.475553	0.210615	-2.25793	0.02395	0.167752	1.52938	0.800169	1.19686	1.80477	1.38086	1.65593
ENSMUSG00000055148.7	Klf2	626.536	-0.475866	0.210734	2.25813	0.0239374	0.167752	0.911124	0.871969	1.20712	0.499958	0.553947	0.449365
ENSMUSG00000033228.8	Scaf11	2178.98	0.392059	0.173616	-2.25819	0.0239335	0.167752	0.7137	0.391102	0.789437	1.28631	0.769887	0.987184
ENSMUSG00000057134.6	Ado	773.592	-0.404694	0.179233	2.25792	0.0239507	0.167752	-0.249843	-0.336639	-0.0576947	-0.689829	-0.500258	-0.696253
ENSMUSG00000025949.16	Pikfyve	576.907	0.480738	0.21297	-2.2573	0.0239891	0.167885	2.00539	1.44237	2.01318	2.68678	2.05972	2.18443
ENSMUSG00000028932.7	Psmc2	4473.16	0.240825	0.106713	-2.25674	0.024024	0.167993	0.217817	0.357873	0.228996	0.609539	0.408354	0.464666
ENSMUSG00000006728.12	Cdk4	8545.66	-0.25334	0.112349	2.25494	0.0241373	0.168376	-0.8828	-0.782787	-0.845838	-1.14502	-1.01039	-1.16219
ENSMUSG00000038736.10	Nudcd1	1117.41	0.505425	0.224102	-2.25533	0.0241124	0.168376	1.16488	0.995101	1.37918	2.13018	1.61262	1.41696
ENSMUSG00000031731.16	Ap1g1	1809.34	0.309928	0.137439	-2.25503	0.0241316	0.168376	1.15435	0.775069	1.16414	1.29284	1.17992	1.49422
ENSMUSG00000021794.16	Glud1	5685.36	0.253709	0.11258	-2.25358	0.0242227	0.168699	-0.061323	0.0418088	0.0866522	0.447518	0.150378	0.193916
ENSMUSG00000024423.6	Impact	1815.75	0.559094	0.248082	-2.25366	0.0242175	0.168699	0.688323	0.633152	0.9196	1.76175	1.13197	1.11322
ENSMUSG00000015733.13	Capza2	3305.59	0.511442	0.22699	-2.25315	0.0242499	0.168752	0.445879	0.205336	0.737379	1.45181	0.666109	0.888645
ENSMUSG00000048277.15	Syngr2	1155.99	-0.298716	0.1326	2.25276	0.0242746	0.168787	-0.229214	-0.164662	-0.20888	-0.612043	-0.316542	-0.609443
ENSMUSG00000036550.16	Cnot1	2904.53	0.395234	0.175478	-2.25232	0.024302	0.168815	1.18207	0.466448	0.9762	1.32895	1.04574	1.34646
ENSMUSG00000032431.6	Crtap	2844.76	-0.285592	0.126832	2.25173	0.0243391	0.168815	0.774741	0.935233	0.878547	0.48699	0.64922	0.563726
ENSMUSG00000032413.12	Rasa2	319.864	0.621814	0.276132	-2.25187	0.0243304	0.168815	0.375836	0.512859	0.953264	1.88196	1.01937	0.991381
ENSMUSG00000048668.16	Rhno1	311.943	-0.441451	0.1961	2.25115	0.0243758	0.168815	-1.1401	-1.16303	-0.871683	-1.65325	-1.51025	-1.42444
ENSMUSG00000020076.7	Ddx50	755.598	0.570193	0.253314	-2.25093	0.0243898	0.168815	-0.342137	-0.474979	-0.110819	0.987644	-0.0261941	-0.0689229
ENSMUSG00000037049.9	Smpd1	1252.12	-0.282566	0.125538	2.25084	0.0243959	0.168815	-0.315654	-0.110996	-0.293581	-0.550578	-0.445192	-0.598311
ENSMUSG00000070436.12	Serpinh1	76844	-0.281618	0.1253	2.24755	0.0246049	0.170026	0.907605	0.855435	0.71327	0.369375	0.604239	0.62412
ENSMUSG00000040785.19	Ttc3	2250.13	0.451963	0.201123	-2.24719	0.0246276	0.170026	1.07805	0.47126	0.858803	1.48715	0.937134	1.31099
ENSMUSG00000003199.16	Mpnd	899.226	-0.348395	0.155038	2.24716	0.02463	0.170026	-1.82128	-2.01898	-1.96611	-2.44711	-2.14475	-2.2746
ENSMUSG00000022680.14	Pdxdc1	3370.77	0.195342	0.0869618	-2.2463	0.0246848	0.170268	0.027984	-0.0414178	0.0365589	0.271697	0.161114	0.137796
ENSMUSG00000027968.11	Larp7	609.394	0.372529	0.16591	-2.24537	0.0247447	0.170408	-0.720745	-0.937228	-0.93358	-0.304533	-0.742708	-0.477786
ENSMUSG00000063550.8	Nup98	5097.9	0.339146	0.15104	-2.24541	0.0247417	0.170408	2.09602	1.5321	1.9084	2.17986	2.06413	2.22341
ENSMUSG00000035172.15	Plekhh3	193.986	-0.517286	0.230594	2.24328	0.0248788	0.170429	-0.655199	-0.688555	-0.549366	-1.22706	-1.17299	-1.08022
ENSMUSG00000040242.14	Fgfr1op2	477.412	0.428471	0.191011	-2.24317	0.024886	0.170429	-1.5262	-1.77033	-1.41591	-1.03389	-1.22123	-1.16095
ENSMUSG00000030016.14	Zfp638	1410.42	0.581857	0.259258	-2.24432	0.0248119	0.170429	2.39285	1.71401	2.29369	3.30166	2.20518	2.71146
ENSMUSG00000031988.10	Vps26b	1527.28	-0.247013	0.11011	2.24332	0.0248762	0.170429	-0.647616	-0.63969	-0.477896	-0.85538	-0.834829	-0.869199
ENSMUSG00000020899.16	Pfas	1490.41	0.363552	0.162066	-2.24324	0.0248811	0.170429	1.2577	0.543157	0.848656	1.14053	1.32834	1.19822
ENSMUSG00000070697.4	Utp3	1302.64	0.280696	0.125081	-2.2441	0.0248258	0.170429	0.41538	0.442845	0.484594	0.882292	0.555673	0.696545
ENSMUSG00000033237.19	Arid2	728.174	0.41174	0.183545	-2.24326	0.02488	0.170429	1.43095	0.90962	1.27383	1.73761	1.34358	1.70577
ENSMUSG00000028706.14	Nsun4	288.861	0.362445	0.161623	-2.24253	0.0249273	0.170577	0.074257	0.0841904	0.244598	0.501689	0.508183	0.451866
ENSMUSG00000000355.13	Mcts1	680.967	0.405368	0.180855	-2.24139	0.0250007	0.170808	1.01022	0.780396	1.24154	1.63331	1.39012	1.26849
ENSMUSG00000028700.14	Pomgnt1	1332.31	-0.422354	0.188415	2.24162	0.0249861	0.170808	-2.51137	-2.30439	-2.37866	-2.85576	-2.50751	-3.10849
ENSMUSG00000042066.16	Tmcc2	552.793	-0.591781	0.264216	2.23976	0.0251064	0.171213	-3.92321	-3.34707	-3.74549	-4.65021	-3.83854	-4.18581
ENSMUSG00000057666.18	Gapdh	4185.6	0.969455	0.432876	-2.23957	0.0251188	0.171213	-9.36439	-9.67077	-9.90094	-9.58978	-7.84168	-8.45652
ENSMUSG00000029458.14	Brap	835.332	-0.277313	0.123825	2.23956	0.0251194	0.171213	-0.399257	-0.296317	-0.305784	-0.656817	-0.531386	-0.673178
ENSMUSG00000026784.14	Pdss1	230.36	0.53264	0.237926	-2.23868	0.0251769	0.171469	0.553985	0.622055	0.830862	1.60846	1.03401	1.05744
ENSMUSG00000014226.10	Cacybp	1398.64	0.616623	0.275663	-2.23687	0.0252946	0.171917	-0.507242	-0.783277	-0.666562	0.560567	-0.348192	-0.179343
ENSMUSG00000024597.11	Slc12a2	750.307	0.501544	0.224234	-2.2367	0.0253061	0.171917	2.17495	1.5504	2.0686	2.80453	2.07167	2.42648
ENSMUSG00000017291.13	Taok1	1148.5	0.530336	0.237133	-2.23645	0.0253223	0.171917	1.09805	0.512302	1.37588	1.85007	1.15857	1.57491
ENSMUSG00000022443.17	Myh9	73014.9	0.436427	0.195114	-2.23678	0.0253007	0.171917	1.15318	0.619921	0.59492	1.03074	1.23346	1.34374
ENSMUSG00000018830.10	Myh11	2410.73	0.541914	0.242461	-2.23506	0.0254135	0.172265	0.441899	0.933425	0.30811	0.963724	1.05794	1.27423
ENSMUSG00000022440.9	C1qtnf6	374.954	-0.467802	0.209294	2.23514	0.0254082	0.172265	-1.7576	-1.46768	-1.39895	-2.14661	-2.12472	-1.82238
ENSMUSG00000028247.2	Coq3	501.841	0.325755	0.145784	-2.2345	0.0254505	0.17238	0.621893	0.803482	0.693006	0.996237	0.896623	1.16215
ENSMUSG00000040738.10	Ints8	1357.13	0.494824	0.221618	-2.23278	0.0255634	0.172738	1.18334	1.0029	1.3769	2.21572	1.44658	1.48919
ENSMUSG00000056708.5	Ier5	2685.36	-0.471796	0.211304	2.23278	0.0255633	0.172738	0.240664	0.433512	0.576361	-0.0325709	-0.0812353	-0.119284
ENSMUSG00000024999.7	Noc3l	945.884	0.414733	0.185743	-2.23284	0.0255597	0.172738	0.757814	0.432484	0.706063	1.44224	0.792117	0.936179
ENSMUSG00000043424.10	Eif3j2	327.889	0.670915	0.300762	-2.23072	0.0256998	0.173117	0.832815	1.16193	1.82691	2.06528	1.71121	1.96207
ENSMUSG00000025184.10	R3hcc1l	317.01	0.432762	0.193989	-2.23086	0.0256905	0.173117	1.52804	1.37692	1.37653	2.04862	1.53493	1.96805
ENSMUSG00000024427.7	Spry4	619.833	-0.438504	0.196526	2.23128	0.0256624	0.173117	0.289114	0.227931	0.31269	-0.369563	-0.40728	0.152556
ENSMUSG00000033161.10	Atp1a1	12749.9	-0.317233	0.142198	2.23093	0.0256861	0.173117	1.10052	1.11601	1.02841	0.605225	0.791876	0.883133
ENSMUSG00000036097.8	Slf2	749.993	0.605871	0.271782	-2.22925	0.0257971	0.173637	0.941623	0.701721	1.30974	2.24121	1.15232	1.53705
ENSMUSG00000048486.6	Fitm2	369.552	-0.39248	0.176127	2.22839	0.0258547	0.173754	-0.389798	-0.307404	-0.316519	-0.702124	-0.851866	-0.735732
ENSMUSG00000020919.11	Stat5b	534.77	-0.328347	0.147346	2.2284	0.0258536	0.173754	-0.625197	-0.685946	-0.733218	-1.15186	-1.0027	-0.91866
ENSMUSG00000052299.9	Ltn1	1955.75	0.414797	0.186246	-2.22714	0.0259378	0.174177	1.44897	1.0873	1.49082	2.2007	1.50076	1.58847
ENSMUSG00000028249.15	Sdcbp	5698.62	0.551807	0.248002	-2.22501	0.0260805	0.174619	0.662441	0.643574	0.82925	1.81694	0.96402	1.12836
ENSMUSG00000054280.14	Prr14l	313.266	0.481429	0.216377	-2.22495	0.0260846	0.174619	0.586882	0.236402	0.697488	1.13657	0.616694	1.17187
ENSMUSG00000064264.14	Zfp428	233.171	-0.747895	0.336057	2.2255	0.0260477	0.174619	-1.35495	-0.663224	0.203205	-1.23023	-1.36011	-1.64532
ENSMUSG00000063200.4	Nol7	735.778	0.454797	0.204331	-2.22579	0.0260284	0.174619	0.067329	0.0498367	0.375848	0.987223	0.505517	0.42032
ENSMUSG00000068267.5	Cenpb	3104.11	-0.349503	0.157122	2.22441	0.0261209	0.174726	-3.833	-3.71157	-3.83911	-4.21731	-4.26418	-4.05978
ENSMUSG00000027379.13	Bub1	1020.37	0.570893	0.256744	-2.22359	0.0261761	0.17496	1.3972	1.08619	1.47703	2.54981	1.51704	1.75371
ENSMUSG00000064138.14	Fam172a	326.189	0.506678	0.227924	-2.22301	0.0262152	0.175086	0.43929	0.037533	0.43102	1.15202	0.537265	0.813746
ENSMUSG00000028271.9	Gtf2b	719.281	0.374158	0.168419	-2.2216	0.0263107	0.175588	0.210777	0.304646	0.481646	0.970055	0.543036	0.618648
ENSMUSG00000035203.16	Epn1	1991.89	-0.285027	0.128327	2.2211	0.0263444	0.175677	-2.05672	-2.02559	-2.18569	-2.4685	-2.29954	-2.38784
ENSMUSG00000051695.6	Pcbp1	8505.65	-0.234791	0.105743	2.2204	0.0263915	0.17572	0.138619	0.0947454	0.135057	-0.175381	-0.100779	-0.0945363
ENSMUSG00000034024.8	Cct2	13186.2	0.229328	0.103277	-2.22051	0.0263844	0.17572	-0.0785477	-0.0152636	-0.0384443	0.201351	0.1218	0.185582
ENSMUSG00000042446.16	Zmym4	771.417	0.403972	0.182077	-2.21869	0.0265079	0.176143	1.00135	0.600712	1.09324	1.49212	1.08145	1.34129
ENSMUSG00000034525.7	Ice1	844.903	0.344085	0.155094	-2.21856	0.0265164	0.176143	0.676715	0.209902	0.488793	0.852988	0.594452	0.929927
ENSMUSG00000038000.10	Acd	448.247	-0.39323	0.177222	2.21886	0.0264961	0.176143	-1.34039	-1.63634	-1.63866	-1.93034	-1.74551	-2.13715
ENSMUSG00000004460.17	Dnajb11	2035.46	-0.322878	0.145708	2.21592	0.0266968	0.176797	0.540478	0.313361	0.209824	-0.0320536	-0.0375465	0.11525
ENSMUSG00000067276.5	Capn6	679.517	0.360272	0.162554	-2.21632	0.0266693	0.176797	1.06239	0.709337	0.75993	1.29713	1.10632	1.21814
ENSMUSG00000019920.18	Lims1	2436.57	0.477084	0.215235	-2.21657	0.0266522	0.176797	0.575731	0.348496	0.813357	1.46835	0.813296	0.945451
ENSMUSG00000055371.17	Stam2	1279.68	0.261638	0.118071	-2.21594	0.0266959	0.176797	0.548226	0.321305	0.459292	0.710662	0.690258	0.687853
ENSMUSG00000090266.10	Mettl23	250.169	-0.525739	0.237313	2.21538	0.0267342	0.176909	-1.63464	-0.868875	-1.07239	-1.97905	-1.59964	-1.56096
ENSMUSG00000045954.7	Cavin2	3669.35	0.457968	0.206814	-2.21439	0.026802	0.177222	1.01813	0.984213	1.15152	2.08023	1.26592	1.23499
ENSMUSG00000028430.14	Nol6	2197.31	0.288667	0.130388	-2.21391	0.0268348	0.177303	-0.0554216	-0.106988	-0.298537	0.10315	0.223459	0.0528836
ENSMUSG00000002458.13	Rgs19	893.87	-0.289664	0.130896	2.21293	0.0269023	0.177521	-0.358968	-0.327875	-0.472322	-0.670841	-0.821842	-0.617017
ENSMUSG00000008690.15	Ncaph2	2222.57	-0.331005	0.149586	2.21281	0.0269106	0.177521	-2.26194	-2.24039	-2.353	-2.64506	-2.49951	-2.74811
ENSMUSG00000056999.15	Ide	1995.6	0.343748	0.155364	-2.21254	0.0269296	0.177521	1.19173	0.737439	1.11437	1.50591	1.14734	1.38554
ENSMUSG00000048327.6	Ckap2l	865.971	0.4364	0.197329	-2.21153	0.0269991	0.177844	1.10887	0.670139	1.03268	1.67839	1.02506	1.42229
ENSMUSG00000038312.10	Edem2	334.292	-0.510999	0.231122	2.21094	0.0270397	0.177975	-0.943574	-0.543898	-0.515967	-1.02357	-1.17245	-1.51173
ENSMUSG00000034394.14	Lif	377.741	-0.425517	0.192565	2.20973	0.0271241	0.178395	-0.86112	-1.32415	-1.1243	-1.33235	-1.52118	-1.71988
ENSMUSG00000041815.14	Poldip3	2722.53	-0.276565	0.125277	2.20763	0.0272703	0.178735	-0.481591	-0.431764	-0.688063	-0.866127	-0.802422	-0.808146
ENSMUSG00000004364.14	Cul3	2116.1	0.5128	0.232331	-2.2072	0.0273001	0.178735	1.1165	0.631724	1.14714	1.93923	1.0224	1.50608
ENSMUSG00000022120.4	Rnf219	348.538	0.391514	0.177365	-2.2074	0.0272864	0.178735	1.57181	1.3856	1.58152	2.11235	1.56511	1.93745
ENSMUSG00000018572.10	Phf23	1738.8	-0.297179	0.134581	2.20818	0.0272315	0.178735	-0.680565	-0.535879	-0.639915	-1.01611	-0.81495	-0.963734
ENSMUSG00000020917.17	Acly	7356.78	0.241234	0.10929	-2.20728	0.0272948	0.178735	0.567653	0.311298	0.317569	0.657803	0.65156	0.55904
ENSMUSG00000019917.10	Sept10	556.59	0.446923	0.202461	-2.20745	0.0272826	0.178735	1.44263	1.21422	1.53762	2.33123	1.57974	1.68594
ENSMUSG00000043542.12	Zc2hc1a	583.702	0.405717	0.183873	-2.20651	0.0273484	0.178915	0.89258	0.960574	1.07314	1.77593	1.00941	1.3394
ENSMUSG00000066042.4	Med18	207.706	-0.462478	0.209641	2.20605	0.0273805	0.17899	1.12787	1.72336	1.40727	0.865697	0.938713	0.949134
ENSMUSG00000070738.10	Dgkd	753.963	-0.311464	0.141222	2.2055	0.0274192	0.178994	-1.34274	-1.11556	-1.05441	-1.42583	-1.35478	-1.67233
ENSMUSG00000058013.11	Sept11	10210.5	0.262745	0.119135	-2.20545	0.0274227	0.178994	0.374205	0.0148659	0.249215	0.574718	0.232945	0.573743
ENSMUSG00000006526.13	Stimate	292.499	-0.435171	0.197492	2.20348	0.0275609	0.17976	-1.0141	-0.613389	-0.802849	-1.51504	-1.13033	-1.09088
ENSMUSG00000075706.10	Gpx4	3619.83	-0.392036	0.178038	2.20198	0.0276667	0.179984	-3.20386	-2.75058	-3.20853	-3.47408	-3.2528	-3.62025
ENSMUSG00000009470.17	Tnpo1	3400.3	0.37514	0.170537	-2.19975	0.0278247	0.179984	0.0771493	-0.30935	0.119281	0.597662	0.128159	0.264616
ENSMUSG00000030347.6	D6Wsu163e	373.853	0.371579	0.168874	-2.20034	0.0277827	0.179984	0.521147	0.443058	0.56537	1.21769	0.691378	0.735503
ENSMUSG00000032740.16	Ccdc88a	763.186	0.587345	0.26698	-2.19996	0.02781	0.179984	2.22541	1.67033	2.45059	3.3247	2.2393	2.699
ENSMUSG00000055320.17	Tead1	3178.86	0.476605	0.216591	-2.20048	0.0277725	0.179984	-0.487806	-1.37583	-0.746222	-0.415532	-0.51471	-0.368435
ENSMUSG00000026657.17	Frmd4a	1817.97	0.327945	0.149064	-2.20002	0.0278053	0.179984	0.59926	0.302342	0.450062	0.753923	0.583887	0.933254
ENSMUSG00000032400.18	Zwilch	547.456	0.367753	0.166991	-2.20223	0.0276488	0.179984	0.947549	0.786618	0.997646	1.56058	1.14286	1.15104
ENSMUSG00000046876.16	Atxn1	371.578	0.455281	0.206858	-2.20093	0.0277409	0.179984	-0.0427529	-0.623576	-0.356505	0.164925	-0.0977448	0.214817
ENSMUSG00000047534.17	Mis18bp1	277.331	0.717726	0.326007	-2.20157	0.027696	0.179984	2.12149	1.4194	2.19364	3.48271	2.34165	2.36826
ENSMUSG00000046546.3	Fam43a	316.281	-0.52745	0.239498	2.20231	0.0276431	0.179984	-1.63367	-1.34657	-0.651385	-1.99828	-1.56125	-1.63785
ENSMUSG00000019817.18	Plagl1	1035.9	0.541225	0.245987	-2.20022	0.0277913	0.179984	1.68981	1.2211	1.39868	2.15342	1.73218	2.0589
ENSMUSG00000026626.11	Ppp2r5a	417.418	-0.386321	0.175693	2.19884	0.0278891	0.179996	-1.52854	-1.65179	-1.49834	-1.87466	-2.13672	-1.93226
ENSMUSG00000018401.17	Mtmr4	1464.49	-0.241023	0.109611	2.1989	0.027885	0.179996	0.260013	0.128982	0.388075	-0.00771961	0.080213	-0.0383632
ENSMUSG00000028127.10	Abcd3	1062.09	0.325845	0.148183	-2.19894	0.0278823	0.179996	0.886699	0.759121	1.0539	1.52017	0.978431	1.18199
ENSMUSG00000058799.16	Nap1l1	4210.33	0.343006	0.156149	-2.19666	0.0280448	0.180308	-2.51416	-2.72305	-2.52842	-1.92835	-2.44347	-2.37798
ENSMUSG00000001482.15	Def8	936.207	-0.403357	0.183605	2.19687	0.0280295	0.180308	-3.14371	-2.72875	-2.85546	-3.22416	-3.34281	-3.41202
ENSMUSG00000020448.16	Rnf185	566.179	-0.34576	0.157339	2.19755	0.0279815	0.180308	-0.778857	-0.544421	-0.795711	-1.1505	-1.06656	-0.965209
ENSMUSG00000047747.10	Rnf150	264.285	0.539229	0.245447	-2.19693	0.0280253	0.180308	-0.222531	-0.999819	-0.249374	0.241839	-0.232346	0.080605
ENSMUSG00000022246.14	Rai14	4504.81	0.318309	0.144882	-2.19703	0.0280186	0.180308	0.574898	0.280209	0.583973	0.938485	0.573937	0.850284
ENSMUSG00000037013.17	Ss18	1179.4	0.39716	0.180833	-2.19628	0.0280716	0.180308	-0.626686	-0.652002	-0.712945	-0.00445912	-0.391293	-0.366131
ENSMUSG00000021711.17	Trappc13	1062.5	0.369296	0.168181	-2.19582	0.0281046	0.180308	0.976034	0.972088	1.29643	1.67336	1.29858	1.40734
ENSMUSG00000026848.14	Tor1b	970.941	-0.294766	0.134231	2.19597	0.028094	0.180308	-0.249047	-0.0515342	-0.0181704	-0.616577	-0.399745	-0.215274
ENSMUSG00000063281.9	Zfp35	248.955	0.623945	0.284252	-2.19504	0.0281609	0.180443	-0.715121	-1.11572	-0.357524	0.511451	-0.319168	-0.354738
ENSMUSG00000027708.14	Dcun1d1	276.897	0.680959	0.310239	-2.19495	0.0281675	0.180443	-1.79131	-2.47919	-1.85462	-0.891733	-1.61259	-1.4324
ENSMUSG00000049327.17	Kmt5a	816.092	-0.358972	0.163779	2.19181	0.0283935	0.181405	-2.23027	-2.2297	-2.319	-2.75312	-2.77732	-2.4146
ENSMUSG00000012640.16	Zfp715	424.935	0.574598	0.262171	-2.19169	0.0284017	0.181405	1.80922	1.50693	2.09028	2.95215	1.9965	2.36181
ENSMUSG00000031696.9	Vps35	5554.99	0.585169	0.266897	-2.19249	0.0283443	0.181405	0.885104	0.776208	1.17168	2.15615	1.27017	1.32052
ENSMUSG00000038241.16	Cep250	836.296	0.429883	0.196124	-2.19189	0.0283876	0.181405	0.250551	-0.00662838	0.0565786	0.242684	0.620013	0.703617
ENSMUSG00000035027.18	Map2k2	2597.61	-0.31794	0.145122	2.19084	0.0284635	0.181531	-1.69074	-1.34783	-1.59526	-2.06626	-1.73759	-1.80116
ENSMUSG00000030536.10	Iqgap1	12465.2	0.380001	0.173444	-2.19091	0.028458	0.181531	0.907619	0.31439	0.492313	0.859333	0.82075	1.0725
ENSMUSG00000028266.17	Lmo4	969.675	-0.350563	0.160117	2.18942	0.0285663	0.182052	0.183212	-0.134211	0.219694	-0.625428	-0.220154	0.0174111
ENSMUSG00000008140.18	Emc10	1975.03	-0.315577	0.144173	2.18888	0.0286057	0.182168	-0.778364	-0.566256	-0.568885	-1.1583	-0.729493	-0.99239
ENSMUSG00000023147.17	Wrb	679.264	-0.400895	0.183284	2.18729	0.0287211	0.182382	-1.1517	-0.84212	-0.922648	-1.27861	-1.10155	-1.76761
ENSMUSG00000033589.4	Reep4	570.333	-0.308169	0.140845	2.188	0.0286699	0.182382	0.789408	0.497319	0.5487	0.274956	0.401036	0.22418
ENSMUSG00000028458.12	Tesk1	333.889	-0.518022	0.236836	2.18726	0.0287237	0.182382	-2.67705	-2.04233	-2.72185	-3.01689	-2.95987	-2.94665
ENSMUSG00000030733.10	Sh2b1	667.37	-0.334468	0.1529	2.18749	0.0287071	0.182382	-1.45208	-1.10132	-1.17478	-1.69695	-1.52458	-1.53964
ENSMUSG00000070544.6	Top1	2432.66	0.399559	0.182724	-2.18667	0.0287664	0.182518	0.893126	0.549137	0.883367	1.55006	0.883979	1.1011
ENSMUSG00000022797.16	Tfrc	3428.11	0.569965	0.260692	-2.18635	0.02879	0.182534	2.76242	1.97557	2.64323	3.5776	2.61608	2.93745
ENSMUSG00000021917.16	Spcs1	1780.09	-0.286899	0.131245	2.18597	0.0288175	0.182574	-0.801524	-0.470631	-0.627533	-0.860187	-0.841134	-1.09561
ENSMUSG00000056220.14	Pla2g4a	2683.2	0.625263	0.286136	-2.1852	0.0288745	0.182801	1.32428	1.23378	1.42887	2.53968	1.63535	1.82216
ENSMUSG00000016918.15	Sulf1	3508.87	0.38196	0.174831	-2.18474	0.0289076	0.182877	1.91518	1.36063	1.72077	1.93194	1.79296	2.34137
ENSMUSG00000040034.15	Nup43	684.075	0.389213	0.178208	-2.18403	0.0289597	0.183072	0.889198	0.942415	1.24229	1.60479	1.3712	1.2859
ENSMUSG00000041765.6	Ubac2	815.911	-0.34568	0.158325	2.18336	0.0290096	0.183119	-0.652634	-0.573986	-0.573377	-0.882508	-0.79652	-1.20046
ENSMUSG00000032312.7	Csk	2071.95	-0.267029	0.122288	2.18361	0.0289911	0.183119	-1.46073	-1.5077	-1.41803	-1.74916	-1.62322	-1.85614
ENSMUSG00000040433.16	Zbtb38	626.75	0.465422	0.213328	-2.18172	0.0291302	0.183746	1.24604	0.907431	1.45423	1.93643	1.2682	1.72919
ENSMUSG00000060090.16	Rp2	245.32	0.608744	0.279167	-2.18057	0.0292153	0.184014	1.68119	1.16613	1.73198	2.82778	1.75661	2.0652
ENSMUSG00000028057.14	Rit1	540.606	-0.349461	0.160241	2.18084	0.0291951	0.184014	-0.784481	-0.865364	-0.902761	-1.39896	-1.19416	-1.06083
ENSMUSG00000001576.15	Ergic1	5326.92	-0.248589	0.114053	2.1796	0.0292873	0.184207	-0.618718	-0.856499	-0.678948	-1.11382	-0.975901	-0.855152
ENSMUSG00000041229.15	Phf8	482.887	0.364295	0.16723	-2.17841	0.0293759	0.184207	0.178659	0.476875	0.302026	0.741369	0.630159	0.705216
ENSMUSG00000024975.13	Pdcd4	409.291	0.398011	0.182756	-2.17783	0.029419	0.184207	1.63121	1.32396	1.90453	2.25407	1.83622	2.04241
ENSMUSG00000018417.14	Myo1b	1902.74	0.446345	0.204835	-2.17905	0.0293277	0.184207	1.39065	0.965627	1.29027	2.09257	1.38203	1.53675
ENSMUSG00000038005.15	Hpf1	644.619	0.467642	0.214754	-2.17757	0.0294381	0.184207	0.296242	0.257327	0.707479	1.02991	0.753989	0.912755
ENSMUSG00000028382.15	Ptbp3	1219.74	0.528889	0.242862	-2.17774	0.0294254	0.184207	1.143	0.520577	1.19717	2.01642	1.22956	1.30308
ENSMUSG00000028081.6	Rps3a1	10781.6	0.427425	0.196158	-2.17899	0.0293327	0.184207	-5.76888	-5.57042	-6.0157	-5.04147	-5.29328	-5.74288
ENSMUSG00000054889.10	Dsp	195.388	0.742735	0.340794	-2.17943	0.0293	0.184207	1.02708	1.41238	1.28248	2.36227	2.35979	1.53282
ENSMUSG00000032294.17	Pkm	40108.7	-0.30653	0.140746	2.1779	0.0294134	0.184207	-1.96751	-1.90558	-2.01185	-2.33366	-2.26594	-2.24476
ENSMUSG00000034520.14	Gjc1	384.998	-0.393005	0.180527	2.17699	0.0294816	0.184345	0.751515	0.107757	0.727437	0.0997776	0.11424	0.161232
ENSMUSG00000033454.6	Zbtb1	1063.85	0.489623	0.224985	-2.17625	0.0295367	0.184412	2.07905	1.72396	2.29161	3.03173	2.20817	2.40432
ENSMUSG00000020962.14	Gtf2a1	455.054	0.434879	0.19988	-2.1757	0.0295777	0.184412	0.898195	0.353375	1.04034	1.31702	0.985611	1.2591
ENSMUSG00000033931.9	Rbm34	449.183	0.494907	0.227387	-2.1765	0.0295181	0.184412	0.287442	0.186186	0.873895	1.10944	0.830911	0.93582
ENSMUSG00000005609.16	Ctr9	1757.64	0.27685	0.127231	-2.17596	0.0295582	0.184412	0.839864	0.490347	0.671837	1.02607	0.761246	0.967207
ENSMUSG00000071477.10	Zfp777	662.56	-0.318162	0.146319	2.17444	0.0296721	0.184867	-0.26991	-0.36857	-0.332352	-0.62383	-0.616849	-0.764005
ENSMUSG00000034021.15	Pds5b	1421.33	0.548985	0.252659	-2.17283	0.0297934	0.185489	2.14734	1.31447	1.9893	2.91594	1.99105	2.26709
ENSMUSG00000031446.14	Cul4a	1938.35	0.243763	0.112302	-2.17061	0.0299608	0.186262	-0.0194807	-0.0437179	0.114568	0.297493	0.138327	0.324251
ENSMUSG00000049553.11	Polr1a	2446.62	0.460984	0.212369	-2.17067	0.0299562	0.186262	0.899136	0.229657	0.34566	0.804004	0.819752	1.13647
ENSMUSG00000055116.8	Arntl	555.775	0.392618	0.180956	-2.16969	0.0300303	0.18656	0.750575	0.116654	0.474268	0.866325	0.64872	0.922498
ENSMUSG00000030522.14	Mtmr10	1245	0.316999	0.14616	-2.16885	0.0300944	0.186684	0.446205	0.0509961	0.531534	0.791938	0.517864	0.659914
ENSMUSG00000015202.13	Cnksr3	312.633	-0.438335	0.202131	2.16857	0.0301151	0.186684	0.432843	0.0295269	0.166011	-0.349407	-0.208413	-0.168705
ENSMUSG00000021518.4	Ptdss1	995.807	-0.312419	0.144031	2.16911	0.0300746	0.186684	-0.837449	-0.523803	-0.736804	-1.10326	-0.926475	-1.0074
ENSMUSG00000023921.9	Mmut	547.389	0.391009	0.180359	-2.16795	0.0301628	0.186845	1.42869	1.3139	1.22784	2.08818	1.53482	1.56796
ENSMUSG00000039662.16	Icmt	1220.97	-0.342044	0.157827	2.16721	0.0302186	0.187056	-1.98525	-1.73085	-1.72381	-2.13175	-2.24337	-2.19549
ENSMUSG00000022300.10	Dcaf13	1456.02	0.368634	0.170177	-2.16618	0.0302974	0.18741	0.630366	0.59865	0.742425	1.30302	0.858758	0.925658
ENSMUSG00000029598.12	Plbd2	1219.01	-0.288287	0.133149	2.16515	0.0303762	0.187762	0.324816	0.233924	0.208253	-0.227258	0.111238	-0.00642102
ENSMUSG00000034023.16	Fancd2	334.218	0.387069	0.178845	-2.16427	0.0304439	0.187978	1.30467	1.12298	1.30001	1.68867	1.68749	1.437
ENSMUSG00000003031.14	Cdkn1b	375.815	-0.384122	0.177495	2.16413	0.0304547	0.187978	0.218851	0.232958	0.497869	0.118052	-0.405537	-0.0429358
ENSMUSG00000015092.9	Edf1	2519.13	-0.388968	0.179811	2.16321	0.0305254	0.188166	-2.09121	-2.06348	-2.29911	-2.33078	-2.81701	-2.60528
ENSMUSG00000079108.6	Srp54c	258.505	0.553589	0.255917	-2.16316	0.0305287	0.188166	-0.152162	-0.0371465	0.380051	1.20953	0.180106	0.556877
ENSMUSG00000031633.4	Slc25a4	12067	0.316181	0.146254	-2.16186	0.0306289	0.188649	-0.122964	0.221563	0.0538418	0.488612	0.337163	0.22653
ENSMUSG00000031021.13	Tmem9b	577.691	-0.382188	0.176865	2.1609	0.0307031	0.188971	-0.655186	-0.535651	-0.385478	-0.987249	-0.767899	-0.997435
ENSMUSG00000027639.16	Samhd1	2580.67	0.186426	0.0862979	-2.16026	0.0307525	0.18914	0.125496	0.0392975	0.178209	0.313214	0.185339	0.364283
ENSMUSG00000066842.18	Hmcn1	833.713	0.515508	0.239095	-2.15608	0.0310777	0.189519	3.98674	3.68368	3.76559	4.07517	4.24648	4.61823
ENSMUSG00000024187.15	Fam234a	625.647	-0.318854	0.147895	2.15595	0.0310878	0.189519	-0.550631	-0.510144	-0.500967	-1.02596	-0.864671	-0.695143
ENSMUSG00000038844.10	Kif16b	197.391	0.475429	0.220543	-2.15572	0.0311056	0.189519	0.775384	0.618439	0.487777	1.43253	0.698665	1.20384
ENSMUSG00000025979.13	Mob4	1287.72	0.558426	0.259028	-2.15585	0.0310951	0.189519	0.841392	0.436705	1.07639	1.7883	0.999295	1.33207
ENSMUSG00000020886.17	Dlg4	1014.04	-0.316172	0.146727	2.15484	0.0311744	0.189519	-2.11457	-2.40033	-2.36505	-2.62735	-2.64665	-2.62987
ENSMUSG00000015027.11	Galns	288.539	-0.417074	0.193276	2.15792	0.0309344	0.189519	0.36096	0.413829	0.253882	-0.178965	0.155434	-0.221633
ENSMUSG00000028224.14	Nbn	502.871	0.444362	0.206009	-2.157	0.0310055	0.189519	1.22802	0.689743	1.1635	1.89134	1.17847	1.38657
ENSMUSG00000079509.10	Zfx	444.991	0.550731	0.255563	-2.15497	0.0311643	0.189519	0.667941	0.43775	0.953169	1.80427	1.02005	0.945124
ENSMUSG00000055041.8	Commd5	202.15	-0.954304	0.442191	2.15813	0.0309179	0.189519	6.03658	6.66044	6.54772	6.02705	5.77127	5.13414
ENSMUSG00000061313.8	Ddhd2	394.929	0.346793	0.160882	-2.15557	0.0311173	0.189519	0.197649	0.221131	0.475943	0.642227	0.620287	0.674511
ENSMUSG00000070426.12	Rnf121	802.024	-0.270241	0.125289	2.15694	0.0310102	0.189519	0.0182446	0.158356	0.354338	-0.146002	-0.122247	-0.0559107
ENSMUSG00000024921.17	Smarca2	402.437	0.537733	0.249566	-2.15467	0.0311874	0.189519	1.02541	0.453233	0.598697	1.58525	0.876291	1.08685
ENSMUSG00000053626.5	Tll1	2542.65	0.494875	0.229449	-2.15679	0.0310218	0.189519	1.77367	1.4695	1.87336	2.33306	1.88611	2.33003
ENSMUSG00000002741.9	Ykt6	2450.25	-0.28145	0.130457	2.15741	0.0309739	0.189519	-1.3269	-1.25944	-1.09099	-1.71434	-1.54299	-1.31115
ENSMUSG00000033075.17	Senp1	488.554	0.49725	0.230458	-2.15766	0.030954	0.189519	-0.907818	-1.44219	-0.529895	-0.435564	-0.712857	-0.270985
ENSMUSG00000024659.15	Anxa1	32041.5	0.512211	0.237641	-2.1554	0.0311305	0.189519	0.513061	0.819535	0.780304	1.7063	0.992402	1.01521
ENSMUSG00000068798.10	Rap1a	321.697	0.64428	0.298692	-2.157	0.0310055	0.189519	-2.26365	-2.56728	-1.66997	-1.05403	-1.68918	-1.63875
ENSMUSG00000024241.7	Sos1	687.808	0.403719	0.187568	-2.15239	0.0313668	0.190096	1.58048	0.973237	1.50529	1.80759	1.54481	1.83129
ENSMUSG00000031231.4	Cox7b	1537.6	0.465914	0.216469	-2.15234	0.0313705	0.190096	-0.148752	-0.196324	-0.00695448	0.847089	0.1528	0.119625
ENSMUSG00000034006.17	Pqlc1	465.679	-0.42709	0.198416	2.1525	0.0313581	0.190096	-1.1846	-0.934044	-0.897342	-1.35648	-1.34491	-1.63557
ENSMUSG00000031353.13	Rbbp7	5552.86	0.242181	0.112478	-2.15314	0.0313078	0.190096	0.156519	0.163045	0.376766	0.440761	0.440073	0.507617
ENSMUSG00000004043.14	Stat5a	196.299	-0.482526	0.224281	2.15144	0.0314418	0.190394	0.301947	0.0178142	0.317563	-0.365715	-0.366786	-0.227543
ENSMUSG00000020133.8	2310011J03Rik	602.144	-0.401025	0.186453	2.15081	0.0314912	0.190559	-1.52024	-1.4885	-1.81001	-2.04997	-2.18059	-1.90413
ENSMUSG00000058291.14	Zfp68	293.791	0.552508	0.257171	-2.14841	0.0316811	0.191517	1.11425	0.605121	1.11142	1.905	1.28947	1.45712
ENSMUSG00000020305.13	Asb3	416.745	0.430602	0.200443	-2.14825	0.0316938	0.191517	1.17492	1.30109	1.6222	2.0416	1.42459	1.89914
ENSMUSG00000056216.9	Cebpg	499.34	-0.517289	0.240878	2.14752	0.0317522	0.191736	0.325033	-0.403618	0.278715	-0.348345	-0.472259	-0.464453
ENSMUSG00000056692.13	Ilrun	1704.51	-0.328251	0.152874	2.1472	0.0317776	0.191755	-2.53041	-2.80219	-2.68003	-3.2036	-3.08893	-2.79087
ENSMUSG00000028718.16	Stil	409.602	0.474933	0.221272	-2.14638	0.0318429	0.192014	1.99516	1.40795	2.05255	2.40988	2.05214	2.3933
ENSMUSG00000033883.11	Zfp267	242.331	0.571887	0.266532	-2.14566	0.0319003	0.192226	1.16363	0.601069	1.12168	2.13829	1.14923	1.41828
ENSMUSG00000021413.9	Prpf4b	1220.34	0.535396	0.249652	-2.14457	0.0319871	0.192615	1.13085	0.586978	1.11773	2.15281	0.969873	1.36791
ENSMUSG00000027223.15	Mapk8ip1	313.037	-0.491732	0.229395	2.1436	0.0320646	0.192947	-1.90359	-2.0428	-2.32398	-2.65903	-2.42451	-2.62633
ENSMUSG00000029233.15	Srd5a3	391.62	-0.407475	0.190137	2.14306	0.0321079	0.193073	0.117702	-0.129147	0.1662	-0.424736	-0.622359	-0.159552
ENSMUSG00000054309.9	Cpsf3	1805.1	0.257817	0.120343	-2.14235	0.032165	0.19322	0.500487	0.223017	0.332875	0.54194	0.471412	0.747966
ENSMUSG00000025495.15	Ptdss2	586.126	-0.42047	0.196279	2.1422	0.0321772	0.19322	-1.20399	-0.607542	-0.962485	-1.41232	-1.09388	-1.46693
ENSMUSG00000026094.14	Stk17b	983.98	0.447095	0.208902	-2.14021	0.0323375	0.194047	0.759902	0.763121	1.38457	1.70477	1.25021	1.31665
ENSMUSG00000022378.14	Fam49b	831.474	0.452715	0.211559	-2.1399	0.0323628	0.194064	0.790513	0.729003	1.19385	1.70494	1.11717	1.30223
ENSMUSG00000031490.6	Eif4ebp1	2881.17	-0.272079	0.127245	2.13822	0.0324985	0.194743	-1.53585	-1.73864	-1.90163	-2.08771	-1.94422	-1.97527
ENSMUSG00000074968.11	Ano3	581.832	0.486694	0.227737	-2.13709	0.0325903	0.194831	2.13515	1.73413	2.31688	2.8516	2.14293	2.70612
ENSMUSG00000058407.12	Txndc9	1105.48	0.424224	0.198491	-2.13724	0.0325783	0.194831	-1.28987	-1.12835	-1.14753	-0.537655	-0.776577	-0.936045
ENSMUSG00000031198.4	Fundc2	996.982	0.376987	0.176435	-2.1367	0.0326227	0.194831	-0.447974	-0.699192	-0.530127	-0.0145582	-0.437795	-0.122311
ENSMUSG00000001127.12	Araf	956.862	-0.277814	0.129957	2.13773	0.0325385	0.194831	-0.293636	-0.144412	-0.0783832	-0.518092	-0.26987	-0.571745
ENSMUSG00000030095.10	Tmem43	3237.84	-0.25158	0.117745	2.13665	0.0326261	0.194831	0.545714	0.590674	0.514407	0.202365	0.254793	0.403911
ENSMUSG00000063785.12	Utp14a	731.857	0.356848	0.167069	-2.13594	0.0326847	0.195046	0.723412	0.152783	0.400506	0.916059	0.449485	0.926285
ENSMUSG00000063576.12	Klhdc3	1407.22	-0.303433	0.142108	2.13523	0.0327424	0.19512	-1.21612	-1.35972	-1.25243	-1.71183	-1.56951	-1.52261
ENSMUSG00000048410.17	Zfp407	392.803	0.417972	0.195734	-2.13541	0.0327279	0.19512	1.01728	1.00728	1.48833	1.79233	1.49407	1.54352
ENSMUSG00000013150.15	Gfod2	201.622	-0.496104	0.232376	2.13492	0.0327674	0.195135	-1.26545	-0.851173	-1.0713	-1.79702	-1.74227	-1.31105
ENSMUSG00000091780.3	Sco2	300.68	-2.83122	1.32767	2.13247	0.0329685	0.195772	10.9981	11.0759	10.9373	8.19267	8.99613	9.51328
ENSMUSG00000003423.15	Pih1d1	933.409	-0.339243	0.15912	2.132	0.033007	0.195772	-0.931591	-0.663613	-0.725905	-1.23304	-1.0755	-1.09513
ENSMUSG00000031774.8	Fam192a	580.082	-0.342322	0.160537	2.13236	0.0329772	0.195772	-0.994497	-1.17188	-1.19068	-1.37195	-1.51787	-1.59463
ENSMUSG00000028656.14	Cap1	14853.4	0.225464	0.105754	-2.13195	0.0330106	0.195772	0.18413	0.152027	0.182312	0.313099	0.465376	0.378624
ENSMUSG00000021676.10	Iqgap2	388.215	0.56017	0.262668	-2.13261	0.0329564	0.195772	1.72013	1.00917	1.47263	2.10096	1.89177	1.75924
ENSMUSG00000032251.12	Irak1bp1	250.068	0.451863	0.211866	-2.13277	0.0329434	0.195772	0.214914	0.214577	0.727838	1.1136	0.634715	0.807949
ENSMUSG00000049878.13	Rlf	781.873	0.561966	0.263715	-2.13096	0.0330924	0.196122	2.04382	1.4608	1.91231	2.94249	1.91225	2.32352
ENSMUSG00000032123.5	Dpagt1	711.316	-0.322171	0.151302	2.12933	0.0332272	0.196714	-0.0519505	-0.415705	-0.0305863	-0.458706	-0.595542	-0.485645
ENSMUSG00000030374.15	Strn4	1544.68	-0.28293	0.132881	2.1292	0.0332379	0.196714	-1.01129	-1.03557	-1.21548	-1.4415	-1.50162	-1.24701
ENSMUSG00000037533.20	Rapgef6	449.795	0.55415	0.260308	-2.12882	0.0332692	0.196765	1.32199	0.839265	1.44859	2.20789	1.20926	1.8647
ENSMUSG00000074934.3	Grem1	1367.04	0.48824	0.229438	-2.12798	0.0333384	0.196769	0.373485	0.325584	0.308745	1.33053	0.619173	0.63493
ENSMUSG00000022110.13	Sucla2	1685.27	0.536904	0.252297	-2.12806	0.0333317	0.196769	0.654344	0.716558	0.830402	1.96454	0.955094	1.02683
ENSMUSG00000029247.17	Paics	3520.29	0.294408	0.138349	-2.12801	0.0333359	0.196769	-0.724691	-0.633101	-0.669828	-0.13819	-0.594854	-0.439905
ENSMUSG00000024298.15	Zfp871	611.049	0.522141	0.245468	-2.12712	0.0334099	0.197057	1.61351	1.14991	2.04495	2.45545	1.68723	2.21287
ENSMUSG00000019809.16	Pex3	267.409	0.418392	0.19673	-2.12673	0.0334422	0.197112	0.799948	0.795878	0.899839	1.36597	0.948268	1.47156
ENSMUSG00000035890.9	Rnf126	1339.67	-0.457983	0.215582	2.1244	0.0336369	0.197394	-1.3454	-1.38526	-1.13536	-1.99213	-1.4003	-1.89739
ENSMUSG00000022884.15	Eif4a2	1754.3	0.494346	0.232724	-2.12418	0.0336555	0.197394	-0.351784	-0.00894984	-0.010826	0.915151	0.0838013	0.198166
ENSMUSG00000067722.4	BC003965	272.161	-0.485967	0.228813	2.12386	0.0336816	0.197394	-0.54828	-0.286262	-0.636674	-0.802182	-1.37978	-0.911945
ENSMUSG00000011096.17	Akt1s1	3697.13	-0.458388	0.21582	2.12394	0.0336753	0.197394	-1.98288	-1.61714	-1.89137	-2.1298	-2.2515	-2.50098
ENSMUSG00000032846.10	Zswim6	921.236	0.387606	0.18241	-2.12492	0.0335932	0.197394	1.85421	1.33956	1.68828	2.05774	1.88029	2.01967
ENSMUSG00000018286.6	Psmb6	4672.84	-0.308449	0.145172	2.12471	0.0336105	0.197394	-0.545519	-0.242538	-0.624781	-0.711114	-0.726531	-0.947789
ENSMUSG00000031834.15	Pik3r2	970.699	-0.33986	0.159963	2.12461	0.033619	0.197394	-1.92673	-1.83448	-2.0547	-2.47047	-2.09349	-2.27446
ENSMUSG00000034066.13	Farp2	805.429	0.308492	0.145281	-2.12342	0.0337186	0.197394	1.89874	1.61155	2.02047	2.21801	1.95946	2.21242
ENSMUSG00000021400.8	Wrnip1	790.155	-0.2664	0.125337	2.12546	0.0335482	0.197394	0.675848	0.741116	0.725632	0.395525	0.544692	0.380486
ENSMUSG00000038692.8	Hoxb4	304.657	-0.50383	0.23726	2.12353	0.0337093	0.197394	-0.42271	0.201677	-0.108816	-0.562115	-0.311614	-0.919751
ENSMUSG00000013646.17	Sh3bp5l	420.98	-0.455634	0.21481	2.1211	0.0339135	0.198131	-2.51327	-2.03609	-2.3673	-2.87132	-3.00244	-2.56698
ENSMUSG00000028419.5	Chmp5	1483.14	0.450953	0.21257	-2.12143	0.033886	0.198131	0.270878	0.370377	0.309216	1.27499	0.415821	0.663211
ENSMUSG00000005102.13	Eif2ak4	559.746	0.361083	0.170217	-2.1213	0.0338962	0.198131	0.591936	0.11801	0.398775	0.554592	0.640462	0.921513
ENSMUSG00000001376.17	Vps50	731.924	0.499823	0.235752	-2.12012	0.0339956	0.198477	0.860563	0.60642	0.997474	1.8919	1.07239	1.13278
ENSMUSG00000034850.15	Tmem127	1375.56	-0.279218	0.131742	2.11943	0.0340539	0.198506	-0.855529	-0.836521	-0.823499	-1.2574	-1.10083	-1.03268
ENSMUSG00000009907.17	Vps4b	899.451	0.465614	0.219696	-2.11936	0.0340602	0.198506	0.409223	0.212242	0.559564	1.47099	0.53403	0.637841
ENSMUSG00000035901.14	Dennd5a	2156.53	-0.233508	0.110184	2.11925	0.0340697	0.198506	-1.96897	-1.96433	-1.87337	-2.17318	-2.22192	-2.16836
ENSMUSG00000053716.9	Dusp7	735.035	-0.411795	0.194349	2.11884	0.0341042	0.198526	0.11107	-0.389092	-0.0511034	-0.675791	-0.451776	-0.47046
ENSMUSG00000003778.14	Brd8	724.946	0.314695	0.148535	-2.11866	0.0341191	0.198526	0.672265	0.166077	0.565485	0.805481	0.691131	0.775882
ENSMUSG00000025001.11	Hells	960.222	0.587839	0.277558	-2.1179	0.0341838	0.198768	1.94981	1.16206	1.86719	2.89463	1.81742	2.13022
ENSMUSG00000034088.15	Hdlbp	20188.3	0.246579	0.116474	-2.11703	0.0342572	0.199061	-0.119446	-0.402797	-0.299778	-0.0435948	-0.129839	0.0321237
ENSMUSG00000032293.8	Ireb2	1358.36	0.499838	0.236207	-2.1161	0.0343363	0.199342	1.1914	0.739442	1.31941	2.09294	1.21247	1.5036
ENSMUSG00000030850.17	Ate1	816.973	0.42239	0.199625	-2.11592	0.0343518	0.199342	0.64689	0.451682	0.871213	1.34234	0.939079	1.0008
ENSMUSG00000039218.17	Srrm2	10894.5	0.469884	0.22212	-2.11545	0.0343915	0.199438	2.19149	1.37409	1.69424	2.08189	1.96977	2.50378
ENSMUSG00000049950.6	Rpp38	213.911	0.543892	0.25729	-2.11393	0.0345214	0.200057	0.695628	1.21973	1.36111	2.12618	1.2166	1.71525
ENSMUSG00000016344.14	Ppdpf	258.121	-0.672074	0.318171	2.1123	0.0346604	0.200147	-3.40965	-3.7753	-3.12383	-4.00325	-4.0253	-4.45192
ENSMUSG00000021027.17	Ralgapa1	661.571	0.539526	0.255401	-2.11246	0.0346467	0.200147	1.71939	1.29746	1.72557	2.49292	1.81862	2.1346
ENSMUSG00000028514.15	Usp24	1574.22	0.449748	0.212924	-2.11224	0.0346655	0.200147	1.01628	0.53248	1.05642	1.78613	0.957935	1.2234
ENSMUSG00000033364.13	Usp37	376.102	0.432401	0.204648	-2.1129	0.0346093	0.200147	1.04402	0.633443	1.26131	1.666	1.20085	1.41935
ENSMUSG00000027018.11	Hat1	1364.84	0.394775	0.186909	-2.11212	0.034676	0.200147	0.810086	0.735929	1.00144	1.63918	1.01612	1.08506
ENSMUSG00000072582.9	Ptrh2	555.989	0.327264	0.15492	-2.11246	0.0346468	0.200147	0.350912	0.459191	0.220179	0.796561	0.509384	0.671422
ENSMUSG00000037366.14	Pafah2	456.996	0.332643	0.157539	-2.1115	0.0347296	0.200322	-0.79502	-0.658217	-0.68674	-0.525825	-0.302166	-0.282877
ENSMUSG00000030629.15	Zfand6	935.525	0.486496	0.230517	-2.11046	0.0348188	0.200702	1.12114	0.638309	1.38493	1.77822	1.40083	1.50177
ENSMUSG00000025130.11	P4hb	28323.6	-0.243139	0.11528	2.10913	0.0349334	0.200858	0.571197	0.513495	0.559799	0.104162	0.379312	0.403255
ENSMUSG00000024579.7	Pcyox1l	737.703	-0.285492	0.135468	2.10745	0.0350786	0.200858	1.49509	1.63952	1.59023	1.25325	1.33807	1.26053
ENSMUSG00000020462.14	Cfap36	536.391	0.516164	0.244842	-2.10815	0.0350176	0.200858	-0.643703	-0.403924	-0.431972	0.637528	-0.395021	-0.190517
ENSMUSG00000028991.15	Mtor	1254.92	0.305075	0.144722	-2.108	0.0350311	0.200858	0.647632	0.460244	0.385244	0.714412	0.802036	0.857
ENSMUSG00000030613.13	Ccdc90b	287.185	0.515309	0.244489	-2.10769	0.0350576	0.200858	0.613125	0.279224	0.744338	1.2745	0.633892	1.28635
ENSMUSG00000036285.10	Noa1	597.329	-0.293841	0.139341	2.1088	0.034962	0.200858	-0.311457	-0.200262	0.0601671	-0.460919	-0.49562	-0.403397
ENSMUSG00000040720.15	Virma	2997.83	0.296691	0.140719	-2.1084	0.0349968	0.200858	1.19729	0.933262	1.20337	1.65004	1.20468	1.34477
ENSMUSG00000025612.5	Bach1	738.392	0.475555	0.225596	-2.108	0.0350311	0.200858	1.58822	0.587045	1.31184	1.82254	1.48161	1.53938
ENSMUSG00000035770.8	Dync1li2	1691.17	0.258027	0.122393	-2.10818	0.0350151	0.200858	-0.277676	-0.282864	-0.175544	0.207328	-0.240631	0.0263482
ENSMUSG00000031386.14	Hcfc1	4249.25	0.297503	0.141152	-2.10769	0.0350582	0.200858	0.990788	0.617596	0.713002	0.938366	1.03044	1.17439
ENSMUSG00000032012.9	Nectin1	590.954	-0.456499	0.216644	2.10714	0.0351055	0.200879	0.446724	0.0927566	0.291011	-0.60648	-0.0494697	0.135904
ENSMUSG00000059273.9	Zc3h4	1200.93	0.347214	0.164939	-2.10511	0.0352821	0.201756	-0.117511	-0.434069	-0.567293	-0.171375	0.0272368	0.0152212
ENSMUSG00000020859.16	Spag9	1897.36	0.472732	0.224598	-2.10479	0.0353093	0.201777	0.920714	0.398213	0.950141	1.68816	0.83649	1.17636
ENSMUSG00000064061.13	Dzip3	428.939	0.60458	0.287303	-2.10433	0.03535	0.201876	1.84606	1.39527	2.05454	3.18606	2.05836	2.11807
ENSMUSG00000033285.15	Wdr3	1461.49	0.277508	0.131918	-2.10365	0.0354094	0.202082	0.875752	0.692327	0.909726	1.30076	1.03956	0.95639
ENSMUSG00000028282.12	Casp8ap2	359.447	0.556252	0.264468	-2.10329	0.0354404	0.202125	1.59802	0.975854	1.62617	2.45268	1.66674	1.9156
ENSMUSG00000028070.7	Naxe	1228.99	-0.313285	0.148981	2.10286	0.0354784	0.202208	-0.299047	-0.199934	-0.387469	-0.459922	-0.618308	-0.803909
ENSMUSG00000055024.12	Ep300	1538.65	0.383874	0.182642	-2.10178	0.0355727	0.202591	2.19294	1.53222	1.94736	2.23897	2.03845	2.43427
ENSMUSG00000031813.8	Mvb12a	954.613	-0.359193	0.17094	2.10128	0.035616	0.202591	-1.17418	-1.06506	-1.09917	-1.24345	-1.6444	-1.60916
ENSMUSG00000032870.8	Smap2	807.499	-0.304733	0.14502	2.10133	0.0356124	0.202591	-0.452938	-0.488306	-0.684275	-0.971289	-0.713224	-0.892733
ENSMUSG00000035212.14	Leprot	777.914	-0.306525	0.145905	2.10086	0.0356532	0.202669	-1.12965	-0.943022	-1.03387	-1.48656	-1.3763	-1.16224
ENSMUSG00000028948.16	Nol9	1558.83	-0.235952	0.112336	2.10041	0.0356929	0.202761	-0.171675	-0.349162	-0.292207	-0.524268	-0.60298	-0.465645
ENSMUSG00000040415.15	Dtx3	362.412	-0.419332	0.199724	2.09956	0.0357675	0.203051	-1.79103	-1.80638	-1.5242	-2.1993	-1.76295	-2.39831
ENSMUSG00000109901.2	Chmp1b	503.193	0.403149	0.19208	-2.09886	0.0358294	0.203135	0.839552	1.01481	0.790241	1.64835	0.895039	1.33982
ENSMUSG00000027932.14	Slc27a3	576.835	-0.378273	0.180212	2.09904	0.0358131	0.203135	0.461308	0.494431	0.458582	-0.0584925	0.388317	-0.0946234
ENSMUSG00000041415.10	Dicer1	791.807	0.415825	0.198228	-2.09771	0.0359308	0.203542	0.935735	0.0830374	0.552523	0.946823	0.674286	1.07222
ENSMUSG00000061859.17	Patj	274.371	0.344931	0.164447	-2.09751	0.0359482	0.203542	0.623568	0.424576	0.512213	0.82269	0.927433	0.852106
ENSMUSG00000069910.2	Spdl1	475.894	0.424899	0.20266	-2.09661	0.0360283	0.203594	1.31679	0.94841	1.37302	1.9299	1.41688	1.61631
ENSMUSG00000022074.6	Tnfrsf10b	1602.35	-0.269711	0.128638	2.09667	0.0360228	0.203594	1.05879	0.789053	0.926974	0.550429	0.537783	0.817847
ENSMUSG00000059743.12	Fdps	278.548	-0.57594	0.274684	2.09674	0.0360165	0.203594	-1.6493	-2.52423	-2.27053	-2.47371	-2.63441	-3.2349
ENSMUSG00000003847.16	Nfat5	1842.09	0.583559	0.278484	-2.09549	0.0361277	0.204022	2.26913	1.14923	1.9263	2.6193	1.8866	2.42806
ENSMUSG00000003581.14	Rnf215	338.516	-0.373612	0.178351	2.09481	0.0361878	0.204103	0.200412	0.290364	0.103754	-0.414899	-0.0329843	-0.111989
ENSMUSG00000039497.8	Dse	868.347	0.375628	0.179316	-2.09478	0.0361903	0.204103	1.03858	0.415847	0.839609	1.31966	0.895562	1.21113
ENSMUSG00000035376.10	Hacd2	397.544	-0.322001	0.153735	2.09453	0.036213	0.204103	-0.404722	-0.174516	-0.146339	-0.575708	-0.744533	-0.413378
ENSMUSG00000025757.13	Hspa4l	552.359	0.598557	0.285922	-2.09342	0.0363113	0.204523	0.928926	1.06898	1.46803	2.41905	1.40914	1.58766
ENSMUSG00000007872.3	Id3	5352.34	-0.395492	0.189	2.09255	0.0363894	0.20483	-0.00160076	0.498775	0.231934	-0.131435	-0.124334	-0.258327
ENSMUSG00000016256.10	Ctsz	2580	-0.268727	0.12855	2.09044	0.0365783	0.205625	0.334179	0.492031	0.218031	-0.0687894	0.105606	0.169358
ENSMUSG00000074884.12	Serf2	1611.68	0.674332	0.32256	-2.09057	0.0365669	0.205625	-6.98831	-6.13063	-7.15503	-5.38177	-6.72531	-6.89916
ENSMUSG00000023025.16	Larp4	778.021	0.606562	0.290366	-2.08896	0.0367118	0.205705	0.528128	-0.231334	0.683086	1.7285	0.519297	0.62064
ENSMUSG00000045822.4	Zswim3	190.387	-0.410952	0.196701	2.08923	0.0366873	0.205705	0.940307	1.22179	0.804243	0.45467	0.642912	0.598988
ENSMUSG00000074916.5	Chst14	1139.74	-0.304058	0.145537	2.08921	0.0366886	0.205705	1.28039	1.34897	1.28394	0.955732	0.926091	1.09048
ENSMUSG00000071637.5	Cebpd	604.897	-0.681793	0.326369	2.08902	0.0367057	0.205705	-0.266856	0.171265	0.714853	-0.442428	-0.314094	-0.961736
ENSMUSG00000031486.15	Adgra2	3228.41	-0.265666	0.127122	2.08986	0.0366308	0.205705	-0.654374	-0.587511	-0.593328	-0.966412	-0.865795	-0.825477
ENSMUSG00000030619.10	Eed	1151.73	0.401093	0.192107	-2.08787	0.0368099	0.206121	0.830176	0.713215	0.871286	1.56957	0.947562	1.137
ENSMUSG00000031262.12	Cenpi	270.903	0.512237	0.245469	-2.08676	0.0369095	0.206474	0.0265195	-0.225471	0.21106	0.946846	0.173161	0.522567
ENSMUSG00000039206.13	Daglb	311.347	-0.402821	0.193048	2.08664	0.0369209	0.206474	1.21442	1.35422	1.05028	0.667646	1.01719	0.759896
ENSMUSG00000025220.8	Oga	1652.39	0.298028	0.142848	-2.08634	0.036948	0.206492	1.21302	0.812207	1.26762	1.50155	1.21326	1.4373
ENSMUSG00000003623.4	Crot	652.811	0.602225	0.288786	-2.08537	0.0370361	0.206608	0.860475	0.965211	1.20826	2.38511	1.37792	1.33223
ENSMUSG00000021712.15	Trim23	458.308	0.685494	0.328724	-2.08532	0.0370405	0.206608	1.74438	1.34264	1.98021	3.31228	2.15952	2.04213
ENSMUSG00000021418.15	Rpp40	251.585	0.366193	0.175596	-2.08543	0.0370304	0.206608	0.803746	0.560452	0.958434	1.24511	1.04812	1.16398
ENSMUSG00000042305.12	Tmem183a	1171.75	-0.370083	0.177516	2.08479	0.0370886	0.206743	-3.12219	-3.2485	-2.8039	-3.5677	-3.08554	-3.57438
ENSMUSG00000035293.13	G2e3	453.007	0.663126	0.31821	-2.08393	0.0371668	0.206989	1.69259	1.15314	2.02963	3.21697	1.78239	2.15359
ENSMUSG00000020088.10	Sar1a	4694.62	-0.238506	0.114459	2.08377	0.0371807	0.206989	-0.498677	-0.515553	-0.305827	-0.599248	-0.883366	-0.611799
ENSMUSG00000039263.16	Npepl1	930.096	-0.396632	0.190376	2.08341	0.0372136	0.207038	-1.40826	-1.14686	-1.461	-1.81214	-1.61886	-1.79529
ENSMUSG00000047694.12	Yipf6	216.737	0.44186	0.212136	-2.0829	0.03726	0.207162	0.13443	-0.0719649	0.0548726	0.630515	0.540937	0.362463
ENSMUSG00000036617.17	Etl4	640.532	0.493184	0.236832	-2.08242	0.0373041	0.207239	1.86028	0.897519	1.53635	1.95934	1.67913	2.02767
ENSMUSG00000026235.14	Epha4	971.356	0.416492	0.200022	-2.08223	0.0373217	0.207239	1.89151	1.85245	2.1423	2.44447	2.17356	2.5128
ENSMUSG00000028883.17	Sema3a	985.278	0.485218	0.233284	-2.07994	0.0375307	0.208132	1.89313	1.89912	2.09493	2.81116	2.01229	2.51069
ENSMUSG00000000838.17	Fmr1	1223.9	0.613197	0.294789	-2.08012	0.0375143	0.208132	1.22058	0.748292	1.59034	2.32311	1.53294	1.65988
ENSMUSG00000024993.15	Fam45a	729.423	0.512534	0.246584	-2.07853	0.0376602	0.208253	0.888862	0.678106	1.01484	1.99362	1.2086	1.0732
ENSMUSG00000040097.16	Flywch1	856.105	-0.3254	0.156563	2.07839	0.0376734	0.208253	-0.98439	-0.536893	-0.652283	-1.14174	-0.965247	-1.05705
ENSMUSG00000043998.10	Mgat2	1449.68	-0.3547	0.170631	2.07876	0.0376394	0.208253	-0.070672	-0.0813661	0.410922	-0.0507857	-0.397549	-0.415096
ENSMUSG00000034826.14	Nup54	504.291	0.426667	0.205215	-2.07912	0.0376062	0.208253	0.00814698	-0.142255	-0.00404388	0.670255	0.117281	0.370439
ENSMUSG00000026275.13	Ppp1r7	801.129	0.319219	0.153514	-2.07942	0.0375789	0.208253	0.202812	0.0308917	0.0985195	0.647975	0.0949627	0.455138
ENSMUSG00000022673.5	Mcm4	3459.69	0.32902	0.15833	-2.07807	0.0377033	0.208285	1.41617	1.04166	1.3088	1.86999	1.34355	1.51504
ENSMUSG00000029004.15	Kmt2e	523.762	0.531669	0.255904	-2.07761	0.0377454	0.208384	0.64622	-0.554666	0.274439	0.570135	0.507377	0.728552
ENSMUSG00000025041.17	Nt5c2	873.075	0.246865	0.118855	-2.07703	0.0377991	0.208394	-0.0130122	0.17177	0.0865865	0.336404	0.326284	0.300306
ENSMUSG00000042106.5	Inka1	455.247	-0.347447	0.167299	2.07681	0.0378195	0.208394	0.374265	0.0154924	0.205736	-0.105444	-0.0534896	-0.359701
ENSMUSG00000022064.10	Pibf1	245.48	0.598387	0.288075	-2.0772	0.0377835	0.208394	1.55184	0.877536	1.43154	2.18297	1.33181	2.1237
ENSMUSG00000051495.7	Irf2bp2	1490.93	-0.417988	0.201445	2.07495	0.0379914	0.209207	1.70285	1.37755	1.84157	1.10408	1.22262	1.27523
ENSMUSG00000030583.16	Sipa1l3	989.228	0.338909	0.163374	-2.07444	0.0380388	0.209335	-0.0148442	-0.45432	-0.342986	0.0179653	0.0632315	0.034359
ENSMUSG00000032583.7	Mon1a	236.746	-0.449945	0.216963	2.07383	0.0380951	0.209511	-0.862243	-0.895891	-0.697048	-1.40661	-1.29848	-1.20332
ENSMUSG00000024516.13	Sec11c	252.059	0.437811	0.211286	-2.07213	0.0382534	0.210247	0.388647	0.257758	0.224327	1.00173	0.624591	0.636205
ENSMUSG00000039108.14	Lsm14b	894.736	-0.311322	0.150266	2.0718	0.0382839	0.210281	0.51954	0.374649	0.27742	-0.1206	0.0264384	0.250025
ENSMUSG00000001052.15	Sec24b	2964.34	0.289515	0.139782	-2.0712	0.0383405	0.210299	1.52442	1.01867	1.31077	1.4706	1.47727	1.69484
ENSMUSG00000041459.15	Tardbp	3794.79	0.293004	0.141481	-2.07098	0.0383603	0.210299	0.244116	0.0809344	0.242099	0.762684	0.313698	0.363652
ENSMUSG00000061207.11	Stk19	216.811	-0.449923	0.217249	2.071	0.038359	0.210299	-1.29101	-0.983501	-1.39646	-1.58584	-1.56399	-1.94549
ENSMUSG00000024140.10	Epas1	214.667	0.637806	0.308022	-2.07065	0.0383913	0.210336	0.0688729	-0.63314	-0.489567	0.416712	0.060011	0.20084
ENSMUSG00000017969.13	Ptgis	1073.26	-0.30155	0.145664	2.07018	0.0384358	0.210445	0.14559	0.0736746	-0.0281776	-0.401464	-0.0359217	-0.315839
ENSMUSG00000023980.7	Taf8	266.486	-0.391834	0.189304	2.06987	0.0384643	0.210468	-0.719602	-0.637059	-0.898399	-1.27074	-1.13507	-1.10391
ENSMUSG00000047213.14	Ythdf3	1812.74	0.520103	0.251502	-2.06799	0.0386411	0.211302	1.76191	1.32592	1.99128	2.73435	1.83173	2.11876
ENSMUSG00000045095.16	Magi1	373.447	0.431516	0.208702	-2.06761	0.0386764	0.211361	0.222299	0.336392	0.176741	0.325724	0.880613	0.832366
ENSMUSG00000035133.9	Arhgap5	1346.3	0.57386	0.277614	-2.06712	0.0387233	0.211483	2.19518	1.5144	2.4999	3.29927	2.25252	2.45576
ENSMUSG00000032547.12	Ryk	2391.04	-0.310637	0.150301	2.06677	0.038756	0.211528	-2.34732	-2.62968	-2.22878	-2.59505	-2.74281	-2.81161
ENSMUSG00000078713.8	Tomm5	679.881	-0.478532	0.231587	2.06632	0.0387983	0.211625	-2.88033	-2.35665	-2.97161	-2.7777	-3.39257	-3.65628
ENSMUSG00000031934.14	Panx1	307.92	-0.365112	0.176755	2.06564	0.0388629	0.211844	-0.0610727	-0.272282	-0.208631	-0.490861	-0.734419	-0.459725
ENSMUSG00000017747.13	Ghdc	387.502	-0.459491	0.222543	2.06473	0.038949	0.212178	-0.426957	0.288824	-0.413681	-0.799121	-0.480894	-0.586419
ENSMUSG00000030423.7	Pop4	1386.03	0.311495	0.150899	-2.06426	0.038993	0.212284	0.0832514	0.207473	0.256615	0.384436	0.276334	0.736904
ENSMUSG00000024081.9	Cebpz	1205.85	0.476693	0.231028	-2.06335	0.0390791	0.212546	0.710979	0.483619	0.856636	1.78733	0.88197	0.918488
ENSMUSG00000064030.15	Pym1	376.723	-0.372276	0.180483	2.06266	0.0391445	0.212546	-1.06991	-1.30296	-1.22684	-1.54192	-1.59552	-1.70753
ENSMUSG00000032959.12	Pebp1	4449.86	-0.377868	0.183179	2.06284	0.039128	0.212546	-3.86318	-3.53876	-3.99415	-4.27136	-4.19067	-4.10503
ENSMUSG00000032578.7	Cish	192.502	-0.434807	0.210817	2.06248	0.0391621	0.212546	0.372576	0.471039	0.432535	-0.0344107	0.393994	-0.331728
ENSMUSG00000032553.14	Srprb	2575.38	-0.277921	0.134752	2.06246	0.0391641	0.212546	-0.231493	0.101652	-0.0238028	-0.377716	-0.178038	-0.475857
ENSMUSG00000042590.17	Ipo11	1224.05	0.316654	0.153558	-2.06211	0.0391972	0.212591	0.87345	0.824919	1.24932	1.53273	1.10295	1.26844
ENSMUSG00000024687.11	Osbp	1841.89	0.227291	0.110239	-2.06181	0.0392262	0.212615	0.743153	0.510769	0.580916	0.841496	0.655518	0.946421
ENSMUSG00000026469.14	Xpr1	572.42	0.423037	0.205306	-2.06051	0.0393494	0.213149	0.84609	0.397664	0.703548	1.26472	0.98078	0.947385
ENSMUSG00000029518.15	Rab35	1208.27	-0.329418	0.159916	2.05994	0.0394047	0.213314	-0.647387	-1.00963	-0.712347	-1.22616	-1.05122	-1.10372
ENSMUSG00000030172.15	Erc1	916.186	0.322107	0.156398	-2.05953	0.0394432	0.213389	0.767272	0.267638	0.397791	0.806134	0.582847	0.914309
ENSMUSG00000014039.18	Prdm15	204.98	0.453711	0.220415	-2.05844	0.0395483	0.213796	0.557279	0.0645642	0.558051	0.884496	0.91017	0.755465
ENSMUSG00000032253.13	Phip	842.791	0.544121	0.264364	-2.05823	0.039568	0.213796	2.28957	1.35734	2.27496	2.94663	2.09482	2.45487
ENSMUSG00000023923.10	Tbc1d5	511.126	0.359083	0.174529	-2.05745	0.0396433	0.214069	0.782956	0.185606	0.486042	0.773615	0.80866	0.835539
ENSMUSG00000008682.13	Rpl10	8660.36	-0.5065	0.246325	2.05623	0.0397604	0.214567	-6.55282	-6.24301	-6.50625	-6.59484	-6.70766	-7.80733
ENSMUSG00000063275.15	Hacd1	503.591	-0.375754	0.18283	2.05522	0.0398582	0.214842	-2.23659	-2.35949	-2.03626	-2.47074	-2.67869	-2.64204
ENSMUSG00000000581.8	C1d	598.55	0.595065	0.289543	-2.05519	0.0398611	0.214842	0.222755	0.156502	0.685136	1.69966	0.595546	0.776843
ENSMUSG00000021244.15	Ylpm1	1328.92	0.458345	0.223159	-2.0539	0.0399857	0.214842	1.5468	0.723452	1.0761	1.45002	1.29286	1.81775
ENSMUSG00000006390.15	Elovl1	2607.39	-0.233509	0.113667	2.05433	0.0399435	0.214842	0.347876	0.275791	0.224516	-0.0318996	0.067595	0.0548897
ENSMUSG00000021876.15	Rnase4	1358.61	0.323679	0.157585	-2.05399	0.0399762	0.214842	1.40493	1.14399	1.42443	1.88498	1.48165	1.58395
ENSMUSG00000031681.16	Smad1	672.158	-0.255608	0.124435	2.05416	0.0399606	0.214842	1.28176	1.08747	1.18318	0.810658	0.899054	1.00177
ENSMUSG00000059439.15	Bcas3	439.78	0.321134	0.156296	-2.05465	0.0399129	0.214842	-0.0838773	-0.149008	-9.92095e-05	0.169469	0.0892756	0.351951
ENSMUSG00000036309.14	Skp1a	2713.46	0.369231	0.179824	-2.0533	0.0400438	0.21502	-0.558952	-0.189442	-0.170664	0.403738	-0.105743	-0.124187
ENSMUSG00000035242.15	Oaz1	3227.19	-0.434931	0.211854	2.05298	0.0400749	0.215054	-5.49425	-5.35566	-5.59157	-5.97131	-6.21624	-5.76282
ENSMUSG00000000441.17	Raf1	837.144	-0.269494	0.131302	2.05247	0.0401239	0.215183	-0.137075	0.0989197	0.212072	-0.276078	-0.168911	-0.217476
ENSMUSG00000034160.13	Ogt	1513	0.303002	0.147749	-2.05079	0.0402875	0.215926	1.58322	1.36275	1.70946	1.98557	1.77324	1.80823
ENSMUSG00000051817.8	Sox12	444.089	-0.494216	0.241051	2.05025	0.0403396	0.216071	-2.79898	-2.80342	-2.91464	-3.31461	-3.192	-3.61255
ENSMUSG00000040044.11	Orc3	927.039	0.472067	0.230377	-2.04911	0.0404517	0.216537	0.790864	0.626672	0.92181	1.83407	1.0573	0.974469
ENSMUSG00000028207.18	Asph	1742.54	0.326194	0.159262	-2.04817	0.0405438	0.216896	1.91097	1.5484	1.81194	2.24935	1.81645	2.14187
ENSMUSG00000089824.10	Rbm12	316.835	0.393522	0.192169	-2.04778	0.0405811	0.216961	0.654796	0.672666	0.811417	1.02768	1.27495	1.05677
ENSMUSG00000005687.14	Bcas2	1004.87	0.258226	0.126122	-2.04744	0.0406149	0.217007	-0.18957	-0.135665	-0.174491	0.09882	0.0779182	0.0540034
ENSMUSG00000015961.8	Adss	2493.42	0.371783	0.181758	-2.04548	0.0408073	0.217186	0.246891	0.151341	0.44551	1.09882	0.407901	0.468346
ENSMUSG00000033411.16	Ctdspl2	277.436	0.503812	0.246289	-2.04561	0.0407945	0.217186	0.0651585	-0.488603	0.341139	0.796431	0.233648	0.5013
ENSMUSG00000048930.12	Tada3	756.897	-0.330677	0.161563	2.04674	0.0406832	0.217186	-0.962363	-0.744544	-1.1221	-1.34871	-1.12799	-1.38171
ENSMUSG00000016534.15	Lamp2	6793.2	0.403418	0.197241	-2.04531	0.0408246	0.217186	2.17712	1.99507	2.40899	2.95294	2.24934	2.62355
ENSMUSG00000031201.17	Brcc3	373.851	0.403233	0.197108	-2.04575	0.0407812	0.217186	1.36166	1.1196	1.37406	1.80569	1.68568	1.54192
ENSMUSG00000056666.13	Retsat	300.021	-0.384516	0.18789	2.0465	0.0407076	0.217186	0.905955	1.14305	0.885246	0.716015	0.321165	0.601674
ENSMUSG00000031787.8	Katnb1	427.012	-0.369531	0.180671	2.04533	0.0408226	0.217186	-1.37603	-1.05475	-1.24386	-1.6922	-1.33079	-1.73292
ENSMUSG00000029924.12	Slc37a3	460.327	-0.36385	0.177958	2.04458	0.040896	0.217432	-0.879383	-0.943636	-0.510809	-1.40388	-1.07178	-0.940365
ENSMUSG00000031878.18	Nae1	1042.38	0.510721	0.249955	-2.04325	0.0410276	0.217997	0.751799	0.726744	0.906531	1.91684	1.08444	1.05615
ENSMUSG00000034765.6	Dusp5	1368.64	-0.359511	0.175978	2.04293	0.0410597	0.218033	0.0150719	0.0668586	-0.00586175	-0.543384	-0.228363	-0.278688
ENSMUSG00000020224.15	Llph	304.071	1.37053	0.670956	-2.04264	0.0410877	0.218048	#NAME?	-6.26468	-7.67695	-5.64264	-6.59451	-6.10402
ENSMUSG00000031561.16	Tenm3	2485.56	0.505013	0.247336	-2.0418	0.0411709	0.218355	2.21243	1.29613	1.7667	2.01276	2.08794	2.5829
ENSMUSG00000033209.17	Ttc28	1075.32	0.406666	0.19921	-2.04139	0.0412117	0.218437	0.0611082	-0.514513	-0.510706	-0.12067	-0.0508808	0.405349
ENSMUSG00000047821.16	Trim16	1662.85	0.214356	0.105045	-2.04061	0.0412901	0.218718	0.254468	0.236843	0.170707	0.360987	0.393354	0.510666
ENSMUSG00000002732.14	Fkbp7	613.398	0.382639	0.187558	-2.04011	0.0413397	0.218847	1.33654	1.51215	1.25229	2.05	1.67604	1.51856
ENSMUSG00000024049.15	Myom1	545.025	0.46574	0.228392	-2.03921	0.0414287	0.219049	0.506727	0.430035	0.0361158	0.7034	0.586336	0.978737
ENSMUSG00000024431.15	Nr3c1	1134.81	0.388142	0.190317	-2.03945	0.0414056	0.219049	1.13906	0.917524	1.48558	1.75543	1.25209	1.71345
ENSMUSG00000037621.8	Atoh8	879.553	-0.574959	0.282069	2.03836	0.0415138	0.219269	-0.946735	-0.339228	-0.83513	-1.30235	-1.33601	-1.203
ENSMUSG00000024548.11	Setbp1	317.134	0.520866	0.255573	-2.03803	0.0415466	0.219269	1.38177	0.611507	0.937783	1.36847	1.32595	1.7231
ENSMUSG00000056763.16	Cspp1	250.553	0.549928	0.269803	-2.03825	0.0415245	0.219269	1.30019	0.571653	1.17387	1.88439	1.44581	1.50156
ENSMUSG00000027663.12	Zmat3	2374.03	-0.230245	0.112989	2.03777	0.0415729	0.219274	-0.729697	-0.993878	-0.759732	-1.11154	-1.07863	-1.04123
ENSMUSG00000020744.13	Slc25a19	214.169	-0.487506	0.239318	2.03706	0.0416439	0.219514	-1.59207	-1.19363	-1.46511	-2.00906	-2.15851	-1.72497
ENSMUSG00000045665.5	Mfsd5	1135.53	-0.242554	0.119098	2.03659	0.0416912	0.219572	-0.276699	-0.193945	-0.0382224	-0.456634	-0.3902	-0.434753
ENSMUSG00000022752.9	Tomm70a	3147.49	0.349126	0.171439	-2.03644	0.0417057	0.219572	0.669502	0.485586	0.958714	1.31409	0.82894	1.02419
ENSMUSG00000032254.10	Kif23	1182.79	0.397962	0.195547	-2.03512	0.0418389	0.220139	0.98984	0.396052	0.666615	1.51154	0.780827	0.921075
ENSMUSG00000020190.13	Mknk2	1601.83	-0.393957	0.193615	2.03474	0.0418769	0.220205	-1.73105	-1.41444	-1.7396	-2.35928	-1.65567	-2.06767
ENSMUSG00000031708.17	Tecr	3448.05	-0.28307	0.139144	2.03437	0.0419139	0.220265	0.39001	0.224194	0.242892	0.0352081	-0.00680555	-0.0850873
ENSMUSG00000004394.12	Tmed4	1081.96	-0.30009	0.147584	2.03335	0.042017	0.22027	-0.429805	-0.167032	-0.253241	-0.525847	-0.598581	-0.688682
ENSMUSG00000024304.14	Cdh2	3560.45	0.29578	0.145464	-2.03336	0.0420166	0.22027	2.11246	2.21989	2.20835	2.45272	2.23287	2.72314
ENSMUSG00000041324.14	Inhba	9377.25	0.4055	0.199376	-2.03384	0.0419674	0.22027	1.2305	0.953814	1.34238	1.7123	1.3194	1.65365
ENSMUSG00000030330.15	Ing4	199.626	-0.973516	0.478629	2.03396	0.0419551	0.22027	6.91403	6.29356	7.39602	6.27521	6.09718	5.66914
ENSMUSG00000031447.7	Lamp1	15482.1	-0.236856	0.116514	2.03286	0.0420672	0.220399	0.889712	0.763353	0.889385	0.436057	0.565051	0.780178
ENSMUSG00000019877.10	Serinc1	5552.04	0.338418	0.166548	-2.03196	0.0421579	0.220741	1.6754	1.71434	1.96135	2.34332	1.88357	2.14122
ENSMUSG00000055485.6	Soga1	1506.14	0.333989	0.164493	-2.03041	0.0423148	0.22121	0.874693	0.920431	0.915204	1.23389	1.30583	1.14957
ENSMUSG00000089715.12	Cbx6	1286.2	-0.412057	0.202917	2.03067	0.0422888	0.22121	-1.43526	-1.0693	-1.41113	-2.00443	-1.45612	-1.66784
ENSMUSG00000058056.16	Palld	14726.7	0.277536	0.136696	-2.03032	0.0423244	0.22121	0.799607	0.747304	0.836131	1.12162	0.952604	1.10185
ENSMUSG00000014859.9	E2f4	905.515	-0.310171	0.152819	2.02966	0.0423912	0.221425	-0.923888	-1.16759	-1.135	-1.46169	-1.34328	-1.39455
ENSMUSG00000030057.15	Cnbp	8008.57	0.311736	0.15363	-2.02914	0.0424441	0.221567	0.101057	0.195749	0.189898	0.722667	0.427786	0.267043
ENSMUSG00000002748.7	Baz1b	3112.38	0.301183	0.14849	-2.02831	0.042529	0.221876	0.899106	0.414111	0.711639	1.11231	0.733285	1.00682
ENSMUSG00000063406.11	Tmed5	1309.75	0.403372	0.198927	-2.02774	0.0425867	0.222043	1.31594	1.26378	1.71149	2.13641	1.54204	1.8585
ENSMUSG00000023010.15	Tmbim6	7148.49	-0.244648	0.120676	2.02732	0.0426298	0.222133	-0.167809	-0.0194266	-0.273144	-0.528974	-0.351117	-0.344806
ENSMUSG00000030243.16	Recql	468.458	0.322128	0.158942	-2.02669	0.0426937	0.222332	1.07718	0.966194	1.00569	1.60084	1.09106	1.29616
ENSMUSG00000025862.14	Stag2	1758.81	0.589139	0.290734	-2.02638	0.0427255	0.222363	1.53494	1.13408	1.71325	2.83407	1.65234	1.87529
ENSMUSG00000021302.10	Ggps1	370.289	0.571999	0.282372	-2.02569	0.0427965	0.222598	-0.940077	-1.15649	-0.510583	0.223744	-0.600365	-0.361385
ENSMUSG00000032336.17	Nptn	4499.74	-0.195397	0.096495	2.02494	0.0428735	0.222865	1.13601	0.977268	1.22578	0.900732	0.793307	1.00479
ENSMUSG00000040423.11	Rc3h1	528.959	0.425438	0.210155	-2.02441	0.0429285	0.223016	0.433233	0.0244704	0.72957	1.10035	0.489875	0.90106
ENSMUSG00000035614.11	Togaram1	550.994	0.47454	0.234446	-2.02409	0.0429604	0.223048	2.10593	1.35237	2.02447	2.74723	2.08154	2.18497
ENSMUSG00000002307.16	Daxx	582.766	-0.324614	0.160456	2.02307	0.0430657	0.22346	-0.498409	-0.549273	-0.545678	-1.04669	-0.654039	-0.876782
ENSMUSG00000002846.9	Timmdc1	632.443	-0.375743	0.185865	2.02158	0.0432193	0.22406	-0.525799	-0.173242	-0.0304209	-0.704542	-0.834919	-0.435394
ENSMUSG00000033701.13	Acbd6	902.483	-0.328822	0.162666	2.02145	0.0432332	0.22406	-0.750432	-0.806832	-0.19796	-0.902428	-0.850336	-1.02697
ENSMUSG00000016637.7	Ift27	635.985	-0.357285	0.176807	2.02076	0.0433047	0.224295	-0.346216	-0.360015	-0.629063	-0.925292	-0.694804	-0.843134
ENSMUSG00000021838.17	Samd4	2024.44	0.269724	0.133549	-2.01966	0.0434184	0.22475	0.678779	0.388932	0.642195	0.759205	0.656232	1.0447
ENSMUSG00000060969.9	Irx1	725.12	-0.415392	0.205776	2.01866	0.0435225	0.224888	0.651568	0.00767474	0.246396	-0.190134	-0.125754	-0.092306
ENSMUSG00000000628.10	Hk2	1397.89	0.35972	0.178198	-2.01865	0.0435234	0.224888	1.06251	0.564759	0.631538	1.07687	1.01425	1.15692
ENSMUSG00000028397.13	Kdm4c	529.282	0.441122	0.21852	-2.01868	0.0435208	0.224888	0.914165	0.806308	1.1443	1.87289	1.29646	1.11659
ENSMUSG00000000001.4	Gnai3	2896.64	0.555412	0.275274	-2.01767	0.043626	0.225265	0.642922	0.498624	0.77601	1.92202	0.851612	0.987445
ENSMUSG00000031715.14	Smarca5	1341.35	0.500163	0.247941	-2.01727	0.0436676	0.225265	-0.537413	-0.977599	-0.545325	0.42798	-0.453917	-0.445871
ENSMUSG00000031668.14	Eif2ak3	288.221	-0.379937	0.188358	2.0171	0.0436856	0.225265	1.3916	1.10866	1.09153	0.828314	0.681798	0.784692
ENSMUSG00000046785.8	Epm2aip1	817.048	0.437486	0.216929	-2.01673	0.0437242	0.225265	1.01573	0.675602	1.18651	1.90022	1.09193	1.24875
ENSMUSG00000034659.14	Tmem109	2281.11	-0.254298	0.126096	2.0167	0.0437268	0.225265	0.161573	0.237759	0.126272	-0.275875	0.0487702	-0.0454064
ENSMUSG00000042712.10	Tceal9	2794.15	0.517289	0.256709	-2.01508	0.0438962	0.226003	-0.981508	-0.28866	-0.618044	0.355729	-0.279793	-0.342476
ENSMUSG00000026455.14	Klhl12	296.363	0.338807	0.168168	-2.01469	0.0439368	0.226076	0.0374798	0.134859	-0.101096	0.302539	0.392065	0.377479
ENSMUSG00000040883.18	Tmem205	262.252	-0.41966	0.208359	2.01412	0.043997	0.226252	0.145343	0.426717	0.33601	-0.311924	0.0363313	-0.11052
ENSMUSG00000027133.3	Nop10	1142.12	-0.29657	0.147309	2.01324	0.0440889	0.226454	-0.0490132	0.177009	-0.151711	-0.239194	-0.345124	-0.364695
ENSMUSG00000038346.18	Zfp384	547.69	-0.331011	0.164403	2.01341	0.0440718	0.226454	-1.12973	-1.30643	-1.25041	-1.82736	-1.57903	-1.33998
ENSMUSG00000020048.13	Hsp90b1	31984.4	0.309989	0.154104	-2.01156	0.0442666	0.226667	2.711	2.23446	2.58063	2.96594	2.50972	2.93509
ENSMUSG00000039989.7	Cbx4	378.166	-0.354735	0.176312	2.01197	0.0442231	0.226667	0.864967	0.477374	0.708924	0.294633	0.385202	0.24097
ENSMUSG00000064127.13	Med14	1302.38	0.424884	0.211243	-2.01135	0.044288	0.226667	1.63477	0.848307	1.41132	1.89478	1.4811	1.71182
ENSMUSG00000034761.15	Map4k5	1891.07	0.339088	0.168557	-2.01171	0.0442507	0.226667	1.27094	0.911302	1.3338	1.6519	1.28663	1.55316
ENSMUSG00000090053.9	Pakap	303.367	0.476916	0.23704	-2.01196	0.0442237	0.226667	3.65534	3.00502	3.61774	4.51617	3.56464	3.8665
ENSMUSG00000028035.13	Dnajb4	2334.93	0.47516	0.236207	-2.01162	0.04426	0.226667	1.24251	1.08246	1.3831	2.24595	1.40574	1.5789
ENSMUSG00000029655.17	N4bp2l2	774.927	0.474043	0.23572	-2.01105	0.0443204	0.226699	0.323732	0.323536	0.77258	1.50204	0.594749	0.849034
ENSMUSG00000044042.19	Fmn1	493.431	0.411481	0.20478	-2.00938	0.0444972	0.227468	0.316588	0.535735	0.572944	0.999074	0.688349	0.968021
ENSMUSG00000033031.13	Cip2a	1054.4	0.516799	0.257243	-2.00899	0.0445382	0.227543	2.06294	1.26907	2.11202	2.94102	2.00288	2.15855
ENSMUSG00000029614.13	Rpl6	11644.3	0.292638	0.145704	-2.00844	0.0445965	0.227706	-4.18801	-3.89221	-4.37097	-3.95507	-3.79876	-3.83649
ENSMUSG00000036352.16	Ubac1	753.301	-0.385104	0.191818	2.00765	0.0446804	0.228	-2.03193	-1.69485	-2.01583	-2.70765	-2.15984	-2.04098
ENSMUSG00000042492.12	Tbc1d10b	1176.8	-0.265007	0.132125	2.00573	0.0448856	0.228776	-0.945038	-0.973732	-1.04935	-1.39683	-1.05348	-1.32251
ENSMUSG00000026434.12	Nucks1	2341.94	0.321011	0.160045	-2.00575	0.0448824	0.228776	0.106763	-0.269073	0.0139309	0.555831	-0.134616	0.352918
ENSMUSG00000036023.6	Parp2	360.101	0.435074	0.216958	-2.00533	0.0449273	0.228853	0.481987	0.261294	0.754052	1.18378	0.756613	0.886333
ENSMUSG00000022820.4	Ndufb4	679.135	-0.439136	0.219166	2.00367	0.0451059	0.229582	-2.53376	-2.36811	-2.15151	-2.5904	-2.73003	-3.09432
ENSMUSG00000056211.13	R3hdm1	720.703	0.438582	0.218935	-2.00325	0.0451501	0.229582	-0.0602207	-0.843119	-0.267409	0.103515	-0.189248	0.16132
ENSMUSG00000019528.18	Gyg	1325.84	0.289617	0.14456	-2.00344	0.0451302	0.229582	0.218306	0.520548	0.409037	0.602118	0.50851	0.84116
ENSMUSG00000061411.12	Nol4l	222.467	-0.408327	0.203904	2.00254	0.0452264	0.229834	0.0660542	0.150552	-0.196208	-0.584352	-0.407456	-0.207615
ENSMUSG00000003541.6	Ier3	2347.47	-0.390681	0.195169	2.00175	0.0453112	0.229849	0.277003	0.769496	0.472129	0.29754	0.00257524	0.0278427
ENSMUSG00000035278.9	Plekhj1	642.333	-0.405639	0.202648	2.00169	0.0453181	0.229849	-1.01792	-0.922205	-0.995513	-1.36455	-1.22123	-1.5455
ENSMUSG00000056608.14	Chd9	535.706	0.405991	0.202841	-2.00152	0.0453359	0.229849	1.38414	0.770318	1.35036	1.84281	1.31769	1.54028
ENSMUSG00000028848.13	Gpn2	386.712	-0.33283	0.16623	2.00222	0.045261	0.229849	-0.19621	-0.061489	0.00239478	-0.634713	-0.23311	-0.381445
ENSMUSG00000045827.10	Serpinb9	271.303	0.599345	0.299549	-2.00082	0.0454113	0.230096	-0.154916	0.119173	0.460094	1.18179	0.662849	0.522835
ENSMUSG00000041028.16	Ghitm	5762.57	0.250636	0.125346	-1.99955	0.0455494	0.230149	0.454657	0.489725	0.63218	0.816994	0.722963	0.757325
ENSMUSG00000027959.14	Sass6	303.661	0.482503	0.241304	-1.99957	0.0455472	0.230149	2.44206	1.7381	2.3423	2.90703	2.27145	2.79296
ENSMUSG00000036435.13	Exoc1	820.957	0.251697	0.12588	-1.99949	0.045555	0.230149	0.870629	0.688981	0.811562	1.07964	0.870819	1.13262
ENSMUSG00000062382.9	Ftl1-ps1	645.618	2.15256	1.07621	-2.00012	0.0454872	0.230149	#NAME?	-8.77496	-9.54876	-7.78	-6.29023	#NAME?
ENSMUSG00000004655.5	Aqp1	1089.35	-0.481415	0.240672	2.0003	0.0454679	0.230149	-0.146508	-0.0348846	-0.308978	-0.764824	-0.522243	-0.68655
ENSMUSG00000073557.12	Ppp1r12b	367.534	0.427213	0.213783	-1.99835	0.0456792	0.230438	-1.70427	-1.82444	-1.73385	-1.59822	-1.59542	-0.885387
ENSMUSG00000022751.9	Nit2	577.123	0.32036	0.160322	-1.99822	0.0456924	0.230438	0.257063	0.361759	0.321973	0.732703	0.49918	0.645258
ENSMUSG00000055531.12	Cpsf6	1759.74	0.20872	0.104447	-1.99832	0.0456817	0.230438	0.878638	0.606277	0.82468	1.02078	0.920161	0.957466
ENSMUSG00000008333.12	Snrpb2	973.38	0.431779	0.216163	-1.99747	0.0457739	0.230715	0.730156	0.394324	0.621545	1.4877	0.727052	0.862093
ENSMUSG00000079083.3	Jrkl	198.42	0.550932	0.275877	-1.99702	0.0458228	0.230826	2.07086	1.43746	2.37926	2.74365	2.21692	2.76176
ENSMUSG00000017493.12	Igfbp4	2562.16	-0.472134	0.236465	1.99663	0.0458652	0.230905	-0.767774	-0.922669	-0.957099	-1.53969	-1.16021	-1.39024
ENSMUSG00000010277.7	2610507B11Rik	2437.03	-0.244653	0.122647	1.99478	0.046067	0.231148	-2.66507	-2.75225	-2.59923	-3.04412	-2.90706	-2.83941
ENSMUSG00000066643.12	Wdr35	939.759	0.310689	0.155776	-1.99447	0.0461011	0.231148	0.684284	0.591708	0.747858	1.29681	0.761548	0.912673
ENSMUSG00000032998.16	Foxj3	779.148	0.361554	0.181269	-1.99457	0.0460899	0.231148	1.25431	0.585712	1.0968	1.51272	1.0529	1.43439
ENSMUSG00000026819.15	Slc25a25	678.86	-0.300972	0.150866	1.99497	0.0460462	0.231148	-0.829966	-0.508697	-0.771321	-0.908018	-1.1898	-1.01185
ENSMUSG00000046169.10	Adamts6	198.129	0.562992	0.282077	-1.99588	0.0459471	0.231148	0.511488	-0.193789	0.789271	1.14968	0.697735	1.03817
ENSMUSG00000031938.15	4931406C07Rik	416.79	0.301378	0.151027	-1.99552	0.0459857	0.231148	0.12141	0.267916	0.485147	0.617027	0.648163	0.545841
ENSMUSG00000043183.18	Simc1	420.975	0.364048	0.182485	-1.99495	0.0460485	0.231148	1.6374	1.31993	1.5844	2.20467	1.55587	1.83869
ENSMUSG00000027002.13	Nckap1	5205.69	0.437585	0.219428	-1.99421	0.0461295	0.231156	1.06936	0.745053	1.22245	1.89588	1.15137	1.34404
ENSMUSG00000051950.10	B3glct	392.88	-0.336362	0.168735	1.99343	0.0462143	0.231447	0.658299	0.396452	0.587428	0.0900067	0.0687552	0.331172
ENSMUSG00000031153.16	Gripap1	407.319	0.347704	0.174469	-1.99293	0.0462696	0.23159	-0.494388	-0.308973	-0.468082	-0.267465	-0.116757	0.114394
ENSMUSG00000039456.10	Morc3	754.943	0.481774	0.241793	-1.99251	0.0463151	0.231683	1.30586	0.922607	1.49542	2.32555	1.33349	1.6192
ENSMUSG00000033855.15	Ston1	2493.05	0.244327	0.122666	-1.99181	0.0463919	0.231798	0.898033	0.98689	1.10957	1.372	1.10311	1.22917
ENSMUSG00000032030.16	Cul5	1218.34	0.467964	0.234924	-1.99198	0.0463729	0.231798	1.33693	0.919747	1.65916	2.28827	1.47848	1.63486
ENSMUSG00000024360.8	Etf1	5148.56	0.431275	0.21657	-1.99139	0.0464382	0.231844	0.00143258	-0.231667	0.275158	0.892133	0.220924	0.302629
ENSMUSG00000024777.10	Ppp2r5b	805.519	-0.392456	0.197091	1.99124	0.0464548	0.231844	-2.00011	-2.34481	-2.14059	-2.61766	-2.10648	-2.91214
ENSMUSG00000027215.13	Cd82	234.165	-0.457382	0.229764	1.99066	0.046518	0.231917	0.299474	0.2148	0.037207	-0.449018	-0.267512	-0.219888
ENSMUSG00000078453.3	Abracl	1404.5	0.43955	0.220811	-1.99062	0.0465231	0.231917	-0.346897	-0.413159	-0.239327	0.60279	-0.146099	-0.0788144
ENSMUSG00000022024.10	Sugt1	2112.49	0.430842	0.216497	-1.99006	0.0465847	0.23209	0.0629637	0.114374	0.147474	0.96485	0.31515	0.398642
ENSMUSG00000025266.11	Gnl3l	2339.5	0.332394	0.167129	-1.98885	0.0467178	0.232619	0.489334	0.373928	0.522186	1.0865	0.739797	0.579414
ENSMUSG00000018287.12	Spag7	1180.83	0.250711	0.126127	-1.98777	0.0468371	0.233078	0.187404	0.059691	0.0367613	0.207539	0.353872	0.4076
ENSMUSG00000068329.12	Htra2	1084.24	-0.307879	0.154952	1.98694	0.0469293	0.233402	-0.209662	0.0347894	-0.336908	-0.468822	-0.395659	-0.575076
ENSMUSG00000002477.5	Snrpd1	1239.86	0.377716	0.190202	-1.98586	0.0470484	0.233725	-0.553476	-1.00476	-0.586273	-0.10886	-0.475152	-0.428037
ENSMUSG00000039747.11	Orai2	244.911	-0.973022	0.489965	1.9859	0.0470443	0.233725	-4.74057	-4.53456	-5.04008	-5.39124	-4.73756	#NAME?
ENSMUSG00000036501.7	Fam13b	486.174	0.536544	0.270504	-1.98349	0.0473124	0.234461	-0.0913423	-0.250432	-0.0366803	1.0872	0.0221844	0.206515
ENSMUSG00000003154.15	Foxj2	308.343	-0.36268	0.182823	1.98377	0.0472815	0.234461	-0.041241	-0.130029	0.0509242	-0.559567	-0.384827	-0.309106
ENSMUSG00000010067.13	Rassf1	2461.98	0.342309	0.172616	-1.98307	0.0473596	0.234461	1.28318	1.5998	1.71364	1.76096	1.86665	1.9292
ENSMUSG00000031776.17	Arl2bp	715.17	-0.352358	0.1776	1.984	0.0472564	0.234461	-2.71057	-2.67072	-2.14337	-2.97339	-2.90899	-2.72127
ENSMUSG00000034220.7	Gpc1	2106.03	-0.349069	0.176023	1.98308	0.047358	0.234461	-0.139194	-0.165112	-0.39716	-0.717834	-0.390192	-0.627879
ENSMUSG00000004951.10	Hspb1	4737.47	-0.498686	0.25143	1.9834	0.0473229	0.234461	-2.09168	-1.56145	-1.49182	-2.12012	-2.11809	-2.44834
ENSMUSG00000030605.15	Mfge8	8991.7	-0.322412	0.162615	1.98268	0.0474034	0.234543	0.805802	0.957152	0.7254	0.273963	0.671281	0.579
ENSMUSG00000017466.9	Timp2	13194.4	-0.292632	0.14762	1.98233	0.0474424	0.234551	-0.250863	-0.119987	-0.150267	-0.55385	-0.56604	-0.311647
ENSMUSG00000019804.12	Snx3	2661.23	-0.276965	0.139728	1.98218	0.0474593	0.234551	-0.54848	-0.764085	-0.424059	-1.01896	-0.843011	-0.737981
ENSMUSG00000020219.7	Timm13	1809.15	-0.255108	0.128735	1.98165	0.0475179	0.23461	-0.877222	-0.624376	-0.690435	-1.04827	-0.900184	-1.0475
ENSMUSG00000029547.10	Ints1	2708.28	0.269156	0.135829	-1.98158	0.047526	0.23461	-0.0334858	-0.102935	-0.277098	0.0706423	0.222848	0.0786081
ENSMUSG00000022174.8	Dad1	3778.18	-0.237413	0.119824	1.98134	0.0475528	0.23461	0.71207	0.841424	0.662711	0.521855	0.497323	0.441978
ENSMUSG00000033382.15	Trappc8	1117.78	0.450214	0.2273	-1.9807	0.0476247	0.23483	1.51482	1.06875	1.66067	2.3688	1.69908	1.59277
ENSMUSG00000058997.8	Vwa8	561.674	0.298856	0.150917	-1.98027	0.0476737	0.234938	0.589683	0.35275	0.377042	0.687162	0.606844	0.829498
ENSMUSG00000073016.3	Uprt	256.654	0.457383	0.231026	-1.97979	0.0477274	0.235068	2.27385	2.09615	2.2996	3.35862	2.526	2.41691
ENSMUSG00000029334.14	Prkg2	297.935	0.566718	0.286354	-1.97908	0.0478071	0.235294	-0.291512	-1.02885	-0.568095	0.121445	0.0875981	-0.404005
ENSMUSG00000021311.9	Mtr	860.986	0.335445	0.169532	-1.97865	0.0478549	0.235294	1.11444	0.666291	0.698789	1.14877	0.940579	1.29985
ENSMUSG00000025894.11	Aasdhppt	710.374	0.331644	0.167655	-1.97813	0.0479137	0.235294	0.793007	0.924036	1.1427	1.60499	1.21158	1.05688
ENSMUSG00000030795.18	Fus	5577.11	0.314455	0.159019	-1.97746	0.0479893	0.235294	0.0403304	-0.366563	-0.351809	0.024747	0.000744527	0.158711
ENSMUSG00000031309.15	Rps6ka3	1164.82	0.47651	0.240988	-1.97732	0.0480057	0.235294	1.38931	0.878878	1.54915	2.24616	1.40899	1.69195
ENSMUSG00000032249.14	Anp32a	1381.77	0.288943	0.146137	-1.9772	0.0480186	0.235294	-0.317339	-0.812728	-0.573031	-0.187184	-0.420467	-0.287249
ENSMUSG00000033105.12	Lss	993.502	0.327495	0.165568	-1.97801	0.0479271	0.235294	0.0866512	-0.453711	-0.106049	0.0405998	0.108705	0.280752
ENSMUSG00000034610.14	Tut4	551.36	0.516201	0.26105	-1.9774	0.0479963	0.235294	1.31672	0.782521	1.54905	2.40359	1.27141	1.62932
ENSMUSG00000004446.12	Bid	354.712	0.305792	0.154558	-1.9785	0.0478727	0.235294	-0.464753	-0.804442	-0.469947	-0.399975	-0.23226	-0.203568
ENSMUSG00000019975.12	Ikbip	2201.51	0.381632	0.193405	-1.97323	0.0484696	0.235498	1.76749	1.35138	1.80902	2.41234	1.62024	2.05246
ENSMUSG00000059552.13	Trp53	5198.38	-0.246673	0.12484	1.97592	0.0481638	0.235498	-0.342725	-0.457531	-0.521085	-0.679679	-0.741586	-0.702708
ENSMUSG00000029436.9	Mmp17	250.708	-0.419178	0.212421	1.97334	0.048457	0.235498	-0.343034	-0.131275	-0.590803	-0.744514	-0.708564	-0.942429
ENSMUSG00000024528.8	Srfbp1	625.924	0.321265	0.162752	-1.97396	0.0483865	0.235498	0.725514	0.621619	0.779971	1.27907	1.05214	0.763282
ENSMUSG00000026031.15	Cflar	588.657	0.354801	0.179588	-1.97564	0.048196	0.235498	-1.71907	-2.04847	-1.47308	-1.41441	-1.39749	-1.34423
ENSMUSG00000093904.2	Tomm20	2880.56	-0.413459	0.209347	1.975	0.0482685	0.235498	-3.18313	-3.25468	-2.73271	-3.44793	-3.54826	-3.48694
ENSMUSG00000022475.19	Hdac7	1819.69	-0.253611	0.128511	1.97346	0.0484437	0.235498	-1.37593	-1.35139	-1.46671	-1.79735	-1.47921	-1.70046
ENSMUSG00000032198.9	Dock6	499.014	0.289591	0.146589	-1.97552	0.048209	0.235498	-0.387872	-0.509722	-0.413407	-0.271909	-0.239936	-0.0323468
ENSMUSG00000039740.6	Alg2	1021.65	-0.219545	0.11115	1.97522	0.0482433	0.235498	0.780222	0.766283	0.883929	0.469747	0.682577	0.595416
ENSMUSG00000071657.12	Bscl2	613.35	-0.288144	0.145887	1.97511	0.0482551	0.235498	-0.618956	-0.493009	-0.477035	-0.840705	-0.776615	-0.900894
ENSMUSG00000031903.7	Pla2g15	907.107	-0.328968	0.166682	1.97363	0.0484237	0.235498	0.567216	0.89168	0.621789	0.171316	0.545732	0.336382
ENSMUSG00000050315.14	Synpo2	293.932	0.400177	0.202659	-1.97463	0.0483098	0.235498	0.211685	0.422704	0.387338	0.586606	0.515797	1.07808
ENSMUSG00000037815.7	Ctnna1	12013.9	0.200505	0.101551	-1.97444	0.048332	0.235498	0.573056	0.397743	0.394421	0.656928	0.561304	0.699755
ENSMUSG00000007041.9	Clic1	12908.4	-0.281681	0.142559	1.97589	0.0481677	0.235498	0.0860368	0.00739563	0.0831743	-0.297758	-0.0993624	-0.299647
ENSMUSG00000017421.18	Zfp207	4544.3	0.264737	0.134102	-1.97414	0.0483661	0.235498	1.16655	1.11793	1.32287	1.54671	1.37358	1.4632
ENSMUSG00000031827.13	Cotl1	1946.14	-0.379673	0.19244	1.97294	0.0485019	0.235522	-1.98755	-1.52075	-1.95003	-2.1385	-2.39142	-2.16532
ENSMUSG00000030447.15	Cyfip1	6574.07	0.235945	0.11971	-1.97098	0.048726	0.235989	0.936437	0.771568	0.915761	1.308	0.994983	0.993531
ENSMUSG00000046572.10	Zfp518b	632.511	0.295626	0.150014	-1.97066	0.0487622	0.235989	0.881554	0.405854	0.740814	1.01677	0.871738	0.998872
ENSMUSG00000004771.12	Rab11a	2975.41	0.315605	0.160134	-1.97088	0.048737	0.235989	1.02768	1.08109	1.35236	1.61515	1.40603	1.37762
ENSMUSG00000044465.19	Fam160a2	496.143	-0.360936	0.183088	1.97138	0.0486799	0.235989	-0.770411	-0.532228	-0.866974	-1.21082	-0.805931	-1.18189
ENSMUSG00000038563.14	Efl1	737.687	0.265227	0.134518	-1.97168	0.0486457	0.235989	0.655585	0.564488	0.659288	1.09613	0.786361	0.771524
ENSMUSG00000109336.1	Samd4b	1938.11	-0.281847	0.143013	1.97078	0.048749	0.235989	-0.997043	-1.25115	-1.3782	-1.66036	-1.3165	-1.52575
ENSMUSG00000023572.16	Ccndbp1	369.146	0.300468	0.152546	-1.96969	0.0488736	0.236396	-0.446424	-0.557822	-0.297684	-0.201357	-0.0697857	-0.117506
ENSMUSG00000031626.18	Sorbs2	687.511	0.351798	0.178637	-1.96935	0.048913	0.236454	0.855981	1.0052	1.05128	1.39301	1.02306	1.5279
ENSMUSG00000038628.8	Polr3k	623.139	0.383092	0.194635	-1.96826	0.0490379	0.236871	0.438878	0.212807	0.548789	0.830692	0.655401	0.862704
ENSMUSG00000053617.12	Sh3pxd2a	3325.44	0.321734	0.163572	-1.96693	0.0491914	0.236871	-1.05754	-1.48281	-1.29816	-1.14866	-0.959235	-0.803645
ENSMUSG00000040813.16	Tex264	1473.91	-0.256629	0.130463	1.96707	0.0491752	0.236871	-0.530249	-0.301279	-0.380001	-0.762095	-0.518557	-0.728998
ENSMUSG00000020948.9	Klhl28	291.034	0.468915	0.238258	-1.9681	0.0490563	0.236871	2.68742	1.98101	2.63259	3.41415	2.48623	2.80666
ENSMUSG00000061979.8	Rcc1l	468.726	-0.365833	0.185945	1.96743	0.0491337	0.236871	-1.35473	-1.03301	-1.21775	-1.62175	-1.56859	-1.60113
ENSMUSG00000070372.11	Capza1	1250.76	0.48693	0.247443	-1.96785	0.0490858	0.236871	-2.09794	-2.3783	-2.0661	-1.35483	-1.77815	-1.84857
ENSMUSG00000031799.10	Tpm4	13376.8	0.266378	0.13541	-1.96719	0.0491613	0.236871	-1.72884	-1.88	-1.83333	-1.33725	-1.67557	-1.64314
ENSMUSG00000035575.11	Utp6	1382.18	0.325218	0.165439	-1.96579	0.0493225	0.23737	0.464315	0.321252	0.368374	1.05046	0.48651	0.575551
ENSMUSG00000017677.11	Wsb1	1448.75	0.324738	0.165216	-1.96553	0.0493527	0.237383	0.660067	0.752723	0.937379	1.28133	0.951425	1.09235
ENSMUSG00000021670.14	Hmgcr	3143.53	0.292076	0.148625	-1.96519	0.0493924	0.237441	1.69923	1.0925	1.61011	1.7788	1.64688	1.77921
ENSMUSG00000031154.15	Otud5	1195.16	-0.257116	0.13087	1.96466	0.0494531	0.237601	-0.216687	-0.286353	-0.444142	-0.594986	-0.61845	-0.55259
ENSMUSG00000056501.3	Cebpb	768.014	-0.652705	0.332316	1.96411	0.0495176	0.237778	2.84451	2.48417	3.87996	2.29457	2.42942	2.2369
ENSMUSG00000021190.14	Lgmn	1689.96	-0.260654	0.132762	1.96333	0.0496084	0.238069	0.963289	1.00887	0.918161	0.500643	0.787611	0.783805
ENSMUSG00000035949.15	Fbxw2	526.342	-0.324787	0.165478	1.96273	0.0496781	0.238069	-2.17885	-2.0462	-2.00621	-2.65124	-2.25793	-2.26523
ENSMUSG00000035597.19	Prpf39	329.354	0.575667	0.293275	-1.96289	0.0496589	0.238069	1.25977	1.02495	1.67531	2.71445	1.44411	1.7799
ENSMUSG00000021939.8	Ctsb	7663.76	-0.241283	0.122938	1.96264	0.0496886	0.238069	0.812918	0.867919	0.746491	0.438873	0.512042	0.731449
ENSMUSG00000029629.17	Phf14	495.387	0.350577	0.178784	-1.9609	0.0498907	0.23883	0.758224	0.416865	0.566618	1.17238	0.758331	0.897604
ENSMUSG00000034684.12	Sema3f	688.898	-0.420267	0.214335	1.9608	0.0499027	0.23883	0.106251	-0.190867	-0.0485063	-0.57855	-0.432282	-0.460136
ENSMUSG00000034252.14	Senp6	795.867	0.364617	0.185993	-1.96039	0.0499507	0.238927	0.703348	0.320065	0.830758	1.28795	0.66552	1.01191
ENSMUSG00000017715.11	Pgs1	1098.48	-0.288198	0.147047	1.95991	0.0500067	0.239063	-0.751189	-0.623901	-0.866957	-1.20833	-0.963962	-0.969749
ENSMUSG00000024251.10	Thada	961.858	0.390183	0.199312	-1.95766	0.0502705	0.239955	1.99479	1.36302	1.72824	2.02077	1.9609	2.12758
ENSMUSG00000025575.14	Cant1	718.572	-0.343195	0.175301	1.95775	0.0502589	0.239955	-1.20972	-0.964068	-1.29553	-1.56148	-1.31374	-1.62311
ENSMUSG00000073139.9	Tmem185a	497.472	-0.322258	0.164619	1.9576	0.0502768	0.239955	-0.7711	-0.736106	-0.529984	-1.12902	-0.711487	-1.16138
ENSMUSG00000006800.14	Sulf2	4586.82	-0.300837	0.153701	1.95729	0.0503133	0.239997	0.581502	0.287278	0.317149	-0.0898007	0.118551	0.214454
ENSMUSG00000022961.18	Son	6267.86	0.338879	0.173168	-1.95694	0.0503544	0.240059	1.50941	0.876692	1.29369	1.50092	1.41295	1.68605
ENSMUSG00000022982.10	Sod1	3674.82	-0.266432	0.136163	1.95671	0.0503821	0.240059	-1.42237	-1.24062	-1.51965	-1.77908	-1.60114	-1.65626
ENSMUSG00000048495.16	Tyw5	247.805	0.50544	0.258419	-1.95589	0.0504777	0.240117	1.34518	0.766103	1.42219	2.13084	1.60401	1.51697
ENSMUSG00000075229.11	Ccdc58	308.972	0.475514	0.243105	-1.956	0.0504651	0.240117	-0.201066	-0.595176	-0.0719236	0.423624	0.165827	0.0387368
ENSMUSG00000001383.9	Zmat2	973.704	0.284008	0.145179	-1.95626	0.050435	0.240117	-0.321916	-0.376605	-0.428171	-0.114645	-0.260381	0.0191805
ENSMUSG00000028618.11	Tmem59	5754.45	-0.174938	0.0894619	1.95544	0.0505306	0.240236	0.856892	0.92901	1.05968	0.702116	0.733723	0.84313
ENSMUSG00000031370.12	Zrsr2	476.795	0.328365	0.168008	-1.95446	0.0506468	0.240656	-1.2442	-1.08012	-1.25366	-0.775426	-0.90378	-0.945624
ENSMUSG00000030180.15	Kdm5a	777.056	0.449577	0.230186	-1.95311	0.0508068	0.241018	1.11293	0.679897	1.22002	1.89728	1.18764	1.3361
ENSMUSG00000044502.16	Bod1	746.487	-0.34246	0.175333	1.9532	0.0507957	0.241018	-2.76255	-2.31138	-2.33874	-2.79098	-2.8619	-2.86534
ENSMUSG00000060260.13	Pwwp2b	447.898	-0.372337	0.190632	1.95317	0.050799	0.241018	-1.45643	-1.02361	-1.28395	-1.58605	-1.38714	-1.93347
ENSMUSG00000052419.7	2610001J05Rik	681.951	-0.296304	0.151736	1.95276	0.0508484	0.241083	-0.737179	-0.353038	-0.298386	-0.779839	-0.718943	-0.803831
ENSMUSG00000039361.11	Picalm	15501.7	0.426282	0.21837	-1.95211	0.0509256	0.241316	1.01762	0.823261	1.20818	1.75381	1.15022	1.432
ENSMUSG00000032026.7	Rexo2	3416.22	-0.338567	0.173482	1.9516	0.0509857	0.241469	-0.393534	-0.458865	-0.0441418	-0.729958	-0.534061	-0.663151
ENSMUSG00000034463.4	Scara3	251.766	-0.467056	0.239422	1.95076	0.0510851	0.241806	0.329374	-0.281973	-0.00648996	-0.610051	-0.449665	-0.337316
ENSMUSG00000026153.15	Fam135a	373.298	0.569141	0.291866	-1.95001	0.0511749	0.242079	1.46442	1.03063	1.5335	2.74415	1.39855	1.83624
ENSMUSG00000025162.18	Csnk1d	3254.82	-0.206703	0.10605	1.9491	0.051283	0.242079	-0.587321	-0.711377	-0.5818	-0.882097	-0.825315	-0.840275
ENSMUSG00000032575.16	Manf	3779.47	-0.209753	0.107605	1.94929	0.0512608	0.242079	0.143508	0.110696	0.115611	-0.134174	-0.156141	-0.0212721
ENSMUSG00000041720.14	Pi4ka	1766.11	0.249851	0.12816	-1.94952	0.0512335	0.242079	0.470645	0.0318363	0.215856	0.389003	0.514416	0.508806
ENSMUSG00000017144.8	Rnd3	2462.41	0.342711	0.175816	-1.94926	0.0512641	0.242079	1.19439	1.10364	1.40083	1.94105	1.2649	1.55029
ENSMUSG00000036667.14	Tcaf1	2722.7	0.241849	0.1241	-1.94883	0.0513158	0.242102	1.14087	1.22985	1.26815	1.6056	1.41326	1.31727
ENSMUSG00000042104.18	Uggt2	274.743	0.414195	0.212644	-1.94783	0.0514353	0.242533	2.29675	1.90848	2.22139	2.87709	2.32828	2.56919
ENSMUSG00000024525.7	Impa2	240.817	-0.35527	0.182474	1.94696	0.05154	0.242894	-0.121707	-0.31504	-0.194433	-0.438056	-0.697679	-0.69509
ENSMUSG00000036867.7	Smad6	472.144	-0.687902	0.353438	1.94631	0.051617	0.243079	-0.860813	-0.308252	-0.235643	-1.66902	-0.670667	-1.21788
ENSMUSG00000024359.10	Hspa9	12824.3	0.300669	0.154512	-1.94592	0.0516638	0.243079	0.131403	-0.120974	0.149669	0.662614	0.174251	0.222861
ENSMUSG00000052395.17	Rft1	281.848	-0.331232	0.170215	1.94597	0.0516587	0.243079	-0.0346068	-0.0305869	-0.0433781	-0.494239	-0.304045	-0.367382
ENSMUSG00000027011.14	Ube2e3	776.602	-0.379406	0.195089	1.94479	0.0518004	0.243589	-0.808993	-0.766862	-0.225523	-1.15317	-0.979301	-0.858706
ENSMUSG00000029775.14	Klhdc10	939.192	-0.238109	0.122549	1.94296	0.0520208	0.243696	-1.04541	-1.17064	-1.02719	-1.35365	-1.31945	-1.34334
ENSMUSG00000021458.17	Aopep	945.479	-0.280719	0.144402	1.94401	0.0518946	0.243696	-1.73779	-1.44801	-1.58782	-2.02261	-1.9183	-1.70908
ENSMUSG00000040219.4	Ttc12	245.891	0.482335	0.248164	-1.94362	0.0519418	0.243696	-0.242638	0.326028	0.0416277	0.46179	0.399114	0.647579
ENSMUSG00000024208.16	Uqcc2	1404.05	-0.317654	0.163408	1.94394	0.0519031	0.243696	-0.87421	-0.848479	-1.2037	-1.1314	-1.54482	-1.33359
ENSMUSG00000029016.13	Clcn6	211.09	0.407716	0.209825	-1.94313	0.052001	0.243696	-0.0623825	-0.715245	-0.0196734	-0.051133	0.117467	0.297838
ENSMUSG00000021557.15	Agtpbp1	292.779	0.515403	0.265257	-1.94303	0.0520127	0.243696	0.0848079	-0.508595	-0.238028	0.9265	0.192803	-0.164421
ENSMUSG00000042734.6	Ttc9	204.519	-0.485428	0.249768	1.94352	0.0519535	0.243696	-1.78022	-2.10212	-1.84717	-2.61245	-2.31339	-2.33042
ENSMUSG00000048497.11	Mmgt2	243.258	-0.398445	0.205098	1.9427	0.0520519	0.243709	0.0493371	-0.302365	0.306235	-0.42381	-0.419132	-0.2716
ENSMUSG00000020716.16	Nf1	1373.33	0.424692	0.218801	-1.941	0.0522582	0.243896	1.7977	1.16968	1.78666	2.35427	1.65371	1.98922
ENSMUSG00000026608.13	Kctd3	779.195	-0.330584	0.170219	1.9421	0.0521246	0.243896	-1.38876	-1.15637	-0.884488	-1.45223	-1.58661	-1.47411
ENSMUSG00000052459.13	Atp6v1a	3965.51	0.430359	0.221699	-1.94118	0.052236	0.243896	0.29218	0.661273	0.595943	1.291	0.778222	0.805181
ENSMUSG00000031556.6	Tm2d2	1345.74	-0.304942	0.157077	1.94135	0.0522155	0.243896	-0.963849	-0.575487	-0.729817	-1.14524	-0.963884	-1.12667
ENSMUSG00000030035.14	Wbp1	491.123	-0.488472	0.251664	1.94097	0.0522615	0.243896	-3.72111	-3.58998	-3.49242	-4.202	-4.0296	-4.09437
ENSMUSG00000055401.14	Fbxo6	659.479	-0.29372	0.151262	1.9418	0.0521611	0.243896	-0.48552	-0.232741	-0.32363	-0.517586	-0.644806	-0.808211
ENSMUSG00000033295.14	Ptprf	2023.14	-0.239869	0.123605	1.9406	0.0523064	0.243974	0.305292	0.454728	0.331055	0.0269745	0.119331	0.197455
ENSMUSG00000037234.17	Hook3	1298.55	0.505059	0.260402	-1.93953	0.0524362	0.244052	1.51844	1.18596	1.78839	2.66364	1.52111	1.93099
ENSMUSG00000020409.10	Slu7	796.819	0.339989	0.175258	-1.93993	0.0523879	0.244052	0.473378	0.257736	0.258086	1.01125	0.393554	0.593859
ENSMUSG00000043411.15	Usp48	1102.48	0.299732	0.154487	-1.94017	0.0523591	0.244052	0.632833	0.103378	0.634084	0.779171	0.597336	0.846657
ENSMUSG00000023951.17	Vegfa	764.944	-0.349724	0.180305	1.93962	0.0524258	0.244052	0.31223	-0.351975	0.23274	-0.376467	-0.41871	-0.146006
ENSMUSG00000094870.8	Zfp131	477.822	0.486941	0.251258	-1.93802	0.0526213	0.24465	0.692159	0.251554	0.600458	1.52899	0.430147	1.08834
ENSMUSG00000060803.6	Gstp1	1194.83	-0.283268	0.146163	1.93803	0.05262	0.24465	-1.69188	-1.52513	-1.54401	-1.81702	-1.73534	-2.10775
ENSMUSG00000044452.10	Zfp507	443.494	0.348224	0.17971	-1.9377	0.0526601	0.244685	0.884549	0.244401	0.621889	0.94518	0.73499	1.06428
ENSMUSG00000029472.13	Anapc5	4550.06	-0.263461	0.135981	1.93749	0.0526858	0.244685	-2.23974	-2.40329	-2.07848	-2.69656	-2.45562	-2.38301
ENSMUSG00000071646.9	Mta2	4010.97	-0.18106	0.0934693	1.9371	0.0527326	0.244771	-0.335618	-0.348486	-0.242861	-0.488194	-0.543212	-0.490932
ENSMUSG00000051934.5	Spats2	724.376	-0.253024	0.130876	1.93332	0.0531971	0.245092	0.284866	0.106367	0.0354394	-0.191301	-0.115478	-0.0703997
ENSMUSG00000042211.7	Fbxo38	1145.45	0.256655	0.132585	-1.93578	0.0528947	0.245092	0.90857	0.637271	0.896496	1.00313	0.948839	1.19003
ENSMUSG00000032217.13	Rnf111	870.021	0.254174	0.131351	-1.93507	0.0529818	0.245092	1.26188	1.05336	1.36036	1.49472	1.4096	1.53184
ENSMUSG00000073481.9	Marc2	1255.61	-0.280007	0.144732	1.93466	0.0530321	0.245092	-0.182837	0.199881	-0.0393189	-0.406809	-0.179339	-0.315955
ENSMUSG00000067288.13	Rps28	3625.91	-0.414251	0.214196	1.93398	0.053115	0.245092	-4.6524	-4.3759	-4.79898	-4.65942	-5.2014	-5.42434
ENSMUSG00000069793.12	Slfn9	249.928	0.622684	0.321741	-1.93536	0.0529459	0.245092	1.2075	0.591734	0.840412	1.92186	1.0297	1.62376
ENSMUSG00000018800.14	Abca5	663.134	0.457046	0.236309	-1.9341	0.0531004	0.245092	2.10987	2.36372	2.57569	3.01248	2.66268	2.80721
ENSMUSG00000021318.15	Gli3	938.016	0.365963	0.189249	-1.93377	0.0531418	0.245092	1.30593	0.710216	1.0498	1.44232	1.22621	1.42363
ENSMUSG00000037553.14	Zdhhc18	682.431	-0.302006	0.156006	1.93587	0.0528838	0.245092	-1.38411	-1.52811	-1.64084	-1.95666	-1.72579	-1.80552
ENSMUSG00000045639.14	Zfp629	309.975	-0.371397	0.192118	1.93317	0.0532149	0.245092	0.253802	0.241732	-0.0326392	-0.358519	0.0451039	-0.353436
ENSMUSG00000026103.14	Gls	2774.71	0.381138	0.197125	-1.93349	0.0531758	0.245092	1.06875	1.02915	1.3818	1.89773	1.36309	1.38225
ENSMUSG00000038172.14	Ttc39b	816.309	0.320366	0.165729	-1.93307	0.0532277	0.245092	0.490503	0.26662	0.567042	1.01	0.502095	0.774629
ENSMUSG00000037465.10	Klf10	1151.1	0.235511	0.121804	-1.93352	0.0531723	0.245092	1.32004	1.24607	1.35737	1.5255	1.35703	1.7254
ENSMUSG00000024122.16	Pdpk1	702.409	0.417594	0.215863	-1.93453	0.0530482	0.245092	0.419329	0.0580291	0.59898	1.19729	0.359563	0.755145
ENSMUSG00000029056.13	Pank4	568.481	-0.274201	0.141709	1.93496	0.0529952	0.245092	-0.255754	-0.0680625	-0.0387801	-0.383156	-0.356655	-0.481306
ENSMUSG00000040620.15	Dhx33	779.972	0.261297	0.135218	-1.93241	0.053309	0.245335	0.520046	0.182796	0.503861	0.552855	0.561884	0.82914
ENSMUSG00000063808.14	Gpatch1	228.683	0.375852	0.194573	-1.93167	0.0534001	0.245623	-0.187916	-0.31901	-0.0521758	0.0300357	0.320721	0.18704
ENSMUSG00000021464.14	Ror2	843.349	-0.332642	0.172309	1.9305	0.0535449	0.246158	0.925476	0.331367	0.605456	0.112725	0.359042	0.332786
ENSMUSG00000042821.7	Snai1	2023.14	-0.335644	0.173936	1.9297	0.053644	0.246351	0.572245	0.754709	0.392007	0.187393	0.295226	0.202531
ENSMUSG00000036202.16	Rif1	753.51	0.597063	0.309389	-1.92981	0.0536302	0.246351	3.00976	2.02066	2.75261	3.87569	2.70304	3.11591
ENSMUSG00000033055.12	Ankrd54	463.743	-0.419831	0.217659	1.92884	0.0537503	0.246708	-1.53057	-1.35639	-1.5046	-1.89219	-1.82687	-1.9693
ENSMUSG00000019969.14	Psen1	1683.11	-0.235672	0.122203	1.92853	0.0537889	0.246754	0.178658	-0.0348331	0.0634644	-0.295681	-0.145118	-0.112472
ENSMUSG00000020914.17	Top2a	5888.58	0.428207	0.222082	-1.92814	0.0538372	0.246844	1.44249	0.761469	1.17469	1.98865	1.23115	1.43429
ENSMUSG00000050628.6	Ubald2	250.148	-0.720011	0.37379	1.92624	0.0540742	0.247405	-4.22547	-3.94972	-3.76221	-4.71231	-3.69214	-6.02176
ENSMUSG00000051390.10	Zbtb22	277.255	-0.482361	0.25037	1.92659	0.0540304	0.247405	-1.64495	-1.64433	-2.11477	-2.2239	-2.11391	-2.64786
ENSMUSG00000047731.17	Wbp1l	1286.84	-0.297751	0.154563	1.9264	0.0540542	0.247405	-1.37896	-1.28679	-1.48626	-1.94512	-1.50189	-1.59017
ENSMUSG00000005362.14	Crbn	464.61	0.53082	0.275545	-1.92643	0.0540501	0.247405	0.453504	0.441093	0.705413	1.69997	0.632208	1.00974
ENSMUSG00000079614.4	Seh1l	1019.26	0.309398	0.160651	-1.9259	0.0541169	0.247469	0.0821967	-0.170214	0.043	0.489513	0.153154	0.234996
ENSMUSG00000049606.16	Zfp644	770.515	0.3981	0.206799	-1.92505	0.054223	0.247692	1.94106	1.45578	2.21846	2.5657	2.03887	2.24044
ENSMUSG00000026269.14	Rnpepl1	666.188	-0.385856	0.200439	1.92506	0.0542224	0.247692	-1.93866	-1.65391	-2.30095	-2.45898	-2.10551	-2.39678
ENSMUSG00000056050.13	Mia3	2000.04	0.291924	0.151696	-1.9244	0.0543042	0.247932	1.82746	1.38582	1.71398	1.98064	1.71347	2.04396
ENSMUSG00000074457.10	S100a16	327.965	-0.470158	0.244939	1.91949	0.0549222	0.248388	-0.845573	-1.32636	-1.23552	-1.604	-1.94204	-1.50442
ENSMUSG00000027455.16	Nsfl1c	1423.29	-0.297023	0.154694	1.92007	0.0548488	0.248388	-1.63163	-1.56016	-1.85437	-1.95143	-2.10937	-1.98274
ENSMUSG00000005501.14	Usp40	595.686	0.295592	0.153967	-1.91984	0.0548783	0.248388	0.00563407	-0.258087	0.15897	0.448378	-0.0366832	0.332274
ENSMUSG00000042063.11	Zfp386	224.495	0.584954	0.304142	-1.92329	0.0544433	0.248388	0.712935	0.136278	0.766202	1.73796	0.812053	1.05885
ENSMUSG00000029064.15	Gnb1	10353.4	-0.182978	0.0952438	1.92115	0.0547129	0.248388	-0.28195	-0.36008	-0.247202	-0.556754	-0.466258	-0.455564
ENSMUSG00000030465.19	Psd3	218.336	0.530396	0.276233	-1.9201	0.0548451	0.248388	0.78179	0.24219	0.683696	1.53575	0.640143	1.17343
ENSMUSG00000015672.4	Mrpl32	687.142	0.32302	0.168199	-1.92046	0.0547996	0.248388	0.340241	0.462809	0.415815	1.0083	0.580988	0.601261
ENSMUSG00000011831.16	Evi5	324.431	0.50182	0.261146	-1.92161	0.0546551	0.248388	-0.441161	-1.09179	-0.218688	0.210532	-0.2257	-0.16103
ENSMUSG00000020817.16	Rabep1	922.703	0.49611	0.258216	-1.9213	0.0546939	0.248388	0.0417516	-0.470513	0.346232	0.926731	0.249096	0.362484
ENSMUSG00000039478.15	Micu3	207.029	0.538079	0.280011	-1.92164	0.0546515	0.248388	0.899049	0.424585	1.32532	1.70394	1.08735	1.5401
ENSMUSG00000021514.18	Zfp369	241.855	0.383978	0.2	-1.91988	0.0548726	0.248388	1.7039	1.37909	2.00367	2.06571	1.91067	2.28044
ENSMUSG00000030917.13	Tmem159	254.887	-0.506347	0.263638	1.92061	0.0547804	0.248388	-1.84411	-1.26358	-1.04796	-1.80918	-1.52079	-2.41718
ENSMUSG00000037379.7	Spon2	299.559	-0.583416	0.303811	1.92033	0.0548165	0.248388	0.016922	1.12254	0.479902	-0.34903	0.198094	0.071966
ENSMUSG00000030245.10	Golt1b	1344.31	-0.260483	0.135639	1.92041	0.0548061	0.248388	-0.363734	-0.61388	-0.205064	-0.491369	-0.913777	-0.629305
ENSMUSG00000033722.9	BC034090	411.77	-0.332158	0.173041	1.91953	0.0549173	0.248388	-1.18691	-0.981544	-1.15591	-1.66808	-1.41283	-1.26755
ENSMUSG00000003072.15	Atp5d	6706.69	-0.299044	0.155525	1.92281	0.0545045	0.248388	-0.372308	-0.176441	-0.0912216	-0.56362	-0.366812	-0.646104
ENSMUSG00000032387.15	Rbpms2	417.622	-0.497918	0.259238	1.9207	0.05477	0.248388	-2.74256	-2.70659	-2.59598	-3.00429	-3.31892	-3.37002
ENSMUSG00000020009.13	Ifngr1	624.502	-0.345066	0.17974	1.91981	0.0548825	0.248388	1.52949	0.963414	1.44143	0.905699	0.735075	1.20541
ENSMUSG00000033319.5	Fem1c	690.095	0.426618	0.222315	-1.91898	0.0549866	0.248521	1.54402	1.05815	1.63949	2.20143	1.47724	1.84237
ENSMUSG00000015750.15	Aph1a	754.425	-0.859415	0.447997	1.91835	0.055067	0.248521	-6.54184	-6.1881	-6.356	-6.72402	-6.61608	-9.91773
ENSMUSG00000028668.5	Eloa	1476.71	0.248223	0.129384	-1.9185	0.0550478	0.248521	-0.624001	-0.581317	-0.52773	-0.348618	-0.55444	-0.171155
ENSMUSG00000061118.8	Dnajc30	203.994	-0.413579	0.215561	1.91862	0.055033	0.248521	-0.522793	0.0539973	-0.195885	-0.726539	-0.614758	-0.630921
ENSMUSG00000044876.15	Zfp444	385.343	-0.474566	0.247445	1.91786	0.0551282	0.248668	-0.823081	-0.349395	-0.358702	-0.849107	-1.02187	-1.17445
ENSMUSG00000025743.14	Sdc3	3862.9	-0.296672	0.154755	1.91705	0.0552319	0.248733	-0.504337	-0.520894	-0.745628	-1.02117	-0.947479	-0.729648
ENSMUSG00000017288.15	Vps53	1190.94	0.232053	0.121064	-1.91678	0.0552665	0.248733	0.0939972	0.173707	0.206763	0.28939	0.297907	0.523098
ENSMUSG00000022108.8	Itm2b	7508.77	-0.20326	0.106051	1.91661	0.0552869	0.248733	1.1634	1.13922	1.40552	0.953962	0.95286	1.15466
ENSMUSG00000025326.12	Ube3a	1627.05	0.425467	0.221981	-1.91668	0.055278	0.248733	2.29891	1.55449	2.3839	2.76073	2.27737	2.42092
ENSMUSG00000028252.20	Ccnc	409.799	0.502938	0.26236	-1.91698	0.0552408	0.248733	0.843757	0.734332	1.34733	2.04377	1.3264	1.26196
ENSMUSG00000027827.17	Kcnab1	659.061	0.283809	0.148145	-1.91575	0.0553963	0.249096	0.192402	0.263929	0.30914	0.735685	0.321169	0.559311
ENSMUSG00000040520.7	Manea	580.15	0.510748	0.266786	-1.91445	0.0555627	0.249687	1.42642	1.03392	2.02693	2.4515	1.64294	2.02519
ENSMUSG00000020024.7	Cep83	260.483	0.483371	0.252509	-1.91427	0.0555857	0.249687	-0.231649	-0.660223	-0.0489531	0.759505	-0.118349	-0.0725551
ENSMUSG00000029686.15	Cul1	1950.3	0.386352	0.201869	-1.91388	0.055636	0.249783	0.882758	0.578756	1.0828	1.63316	0.895565	1.21461
ENSMUSG00000027750.16	Postn	13848.4	0.861759	0.450423	-1.91322	0.0557198	0.250029	3.72616	1.80347	2.5445	3.66251	3.07371	3.6478
ENSMUSG00000016664.16	Pacsin2	2316.08	0.173726	0.0908275	-1.9127	0.0557866	0.250199	-0.0403304	0.0231361	-0.0521618	0.147421	0.0968125	0.164416
ENSMUSG00000041958.10	Pigs	1321.2	-0.313185	0.163829	1.91166	0.05592	0.250667	0.657994	0.809114	0.520386	0.227796	0.39797	0.414161
ENSMUSG00000041120.6	Nbl1	1113.08	-0.433156	0.226683	1.91084	0.0560247	0.251006	-1.82091	-1.24059	-1.90295	-2.12436	-1.8446	-2.26885
ENSMUSG00000037351.9	Actr1b	3821.42	-0.240311	0.125784	1.91051	0.0560672	0.251066	-1.5568	-1.37277	-1.55243	-1.75877	-1.72063	-1.77186
ENSMUSG00000025630.8	Hprt	2302.18	0.388676	0.203523	-1.90974	0.0561664	0.251379	0.490701	0.472704	0.698124	1.47425	0.699338	0.701213
ENSMUSG00000046434.16	Hnrnpa1	4469.1	0.3538	0.18539	-1.90841	0.0563384	0.252019	-5.16157	-5.1982	-5.48994	-4.59473	-4.98033	-5.23099
ENSMUSG00000056870.9	Gulp1	835.324	0.563149	0.295168	-1.90789	0.0564052	0.252187	1.18324	0.861413	1.54395	2.24767	1.30671	1.77494
ENSMUSG00000026604.17	Ptpn14	2672.31	0.30387	0.159369	-1.90671	0.0565583	0.25274	0.140398	-0.191486	-0.0662983	0.055912	0.293076	0.394719
ENSMUSG00000032816.15	Igdcc4	303.437	-0.385944	0.202446	1.90641	0.0565975	0.252785	0.332417	-0.0569309	-0.00247962	-0.553246	-0.230489	-0.122531
ENSMUSG00000037361.8	Sf3b6	1084.67	0.320331	0.168085	-1.90577	0.0566796	0.25302	0.861502	0.686277	0.803062	1.34359	0.848719	1.09123
ENSMUSG00000027333.18	Smox	268.362	-0.365853	0.192306	1.90246	0.0571116	0.253059	-1.20256	-1.14365	-0.980723	-1.4539	-1.50638	-1.56794
ENSMUSG00000007659.18	Bcl2l1	1596.56	-0.265246	0.139427	1.9024	0.0571187	0.253059	-1.45397	-1.39651	-1.40683	-1.77489	-1.6528	-1.67548
ENSMUSG00000028743.7	Akr7a5	697.536	-0.36742	0.193025	1.90348	0.0569778	0.253059	-0.999051	-0.438348	-0.671555	-1.10054	-0.859932	-1.26891
ENSMUSG00000003948.17	Mmd	674.78	-0.411153	0.215901	1.90436	0.0568629	0.253059	-0.970895	-0.876486	-0.673629	-1.18726	-1.23409	-1.33792
ENSMUSG00000098923.1	Tmem185b	366.604	-0.348463	0.183089	1.90325	0.057008	0.253059	0.933923	0.357528	0.873127	0.207323	0.333188	0.489543
ENSMUSG00000028096.13	Gpr89	418.937	-0.327278	0.171799	1.905	0.0567795	0.253059	-0.14064	-0.53694	-0.262476	-0.67028	-0.38366	-0.876236
ENSMUSG00000040824.3	Snrpd2	2200.14	-0.355144	0.186629	1.90294	0.0570482	0.253059	-3.31043	-3.4791	-3.61795	-3.57208	-3.90439	-4.08055
ENSMUSG00000031667.16	Aktip	307.262	-0.346883	0.182146	1.90442	0.0568549	0.253059	-0.585773	-0.487242	-0.410975	-0.749687	-0.782357	-1.02192
ENSMUSG00000029578.15	Wipi2	2106.87	-0.284295	0.14939	1.90304	0.0570355	0.253059	-1.30456	-1.09275	-1.00475	-1.56218	-1.33486	-1.40894
ENSMUSG00000038024.17	Dennd4c	771.686	0.456979	0.240114	-1.90317	0.057018	0.253059	2.42089	1.74477	2.43359	3.20586	2.28387	2.52225
ENSMUSG00000056228.10	Cars2	327.671	-0.353935	0.186054	1.90233	0.0571282	0.253059	-0.625718	-0.411986	-0.1528	-0.950728	-0.480396	-0.801193
ENSMUSG00000039385.5	Cdh6	256.834	0.429631	0.225817	-1.90256	0.0570976	0.253059	1.70398	1.97386	1.65325	2.17167	2.09531	2.42646
ENSMUSG00000030304.11	Ergic2	747.548	0.462483	0.242901	-1.904	0.0569107	0.253059	0.371692	-0.0142329	0.378834	1.12237	0.366818	0.702911
ENSMUSG00000023367.14	Tmem176a	1033.74	-0.229355	0.120373	1.90537	0.0567319	0.253059	0.542431	0.537467	0.518143	0.217007	0.355282	0.291214
ENSMUSG00000040151.9	Hs2st1	1573.51	-0.246828	0.129634	1.90403	0.0569059	0.253059	0.0378729	-0.216085	0.229357	-0.255095	-0.210437	-0.247019
ENSMUSG00000033444.14	Specc1l	1051.7	0.244759	0.128712	-1.9016	0.0572231	0.25309	0.075742	-0.2069	0.179229	0.154168	0.193	0.393212
ENSMUSG00000066037.14	Hnrnpr	1137.3	0.310545	0.163292	-1.90177	0.0572008	0.25309	-0.0615688	-0.393462	-0.0724232	0.463857	-0.163085	0.0571479
ENSMUSG00000020271.17	Fbxw11	1832.84	-0.207328	0.109004	1.90202	0.0571689	0.25309	-0.012517	-0.0630812	0.083414	-0.266921	-0.238175	-0.147386
ENSMUSG00000019082.18	Slc25a22	612.831	-0.298545	0.157031	1.90118	0.0572785	0.253205	-0.244891	0.129423	-0.129458	-0.3434	-0.298031	-0.530056
ENSMUSG00000078812.10	Eif5a	26158.8	-0.222788	0.117255	1.90002	0.0574301	0.253226	-1.58597	-1.59914	-1.52985	-1.8919	-1.7	-1.82796
ENSMUSG00000030751.18	Psma1	3410.84	0.315371	0.165971	-1.90016	0.0574123	0.253226	0.544387	0.759672	0.831302	1.24318	0.927887	0.902969
ENSMUSG00000020640.10	Itsn2	734.581	0.413332	0.217513	-1.90026	0.0573988	0.253226	0.870295	0.509166	0.919246	1.45554	0.859392	1.24411
ENSMUSG00000040212.12	Emp3	4374.56	-0.291284	0.153241	1.90082	0.0573259	0.253226	0.7847	0.570622	0.389461	0.237119	0.366008	0.189454
ENSMUSG00000034601.17	2700049A03Rik	280.956	0.321011	0.168926	-1.90031	0.0573928	0.253226	1.66588	1.3024	1.63182	1.92412	1.76362	1.87586
ENSMUSG00000001891.16	Ugp2	1560.92	0.41262	0.217202	-1.8997	0.057472	0.253259	0.581982	0.732938	0.898946	1.58374	0.82336	1.09299
ENSMUSG00000036676.14	Tmtc3	1224.39	0.418972	0.220567	-1.89952	0.0574962	0.253259	1.64012	1.09027	1.66993	2.29846	1.56288	1.8112
ENSMUSG00000029034.9	Ints11	1201.72	-0.212015	0.111632	1.89924	0.0575334	0.253294	-0.104011	-0.234514	-0.0952225	-0.355078	-0.386321	-0.379392
ENSMUSG00000034154.15	Ino80	362.077	0.334803	0.17631	-1.89895	0.0575713	0.253332	0.222155	-0.437733	0.00791586	0.181821	0.105689	0.435685
ENSMUSG00000039116.7	Adgrg6	554.757	0.41563	0.219011	-1.89776	0.0577275	0.253668	1.79273	1.04124	1.62203	1.79829	1.75998	2.01759
ENSMUSG00000028954.11	Nub1	1447.07	0.203623	0.107293	-1.89782	0.0577192	0.253668	0.581948	0.626573	0.629901	0.872002	0.647637	0.877654
ENSMUSG00000026858.18	Miga2	589.141	-0.322634	0.170013	1.8977	0.057736	0.253668	-1.6243	-1.2781	-1.66468	-1.82072	-1.81414	-1.93035
ENSMUSG00000020460.15	Rps27a	6949.48	0.467141	0.246265	-1.8969	0.0578405	0.253998	-7.19409	-7.3948	-7.17731	-6.44371	-6.71154	-7.15509
ENSMUSG00000048755.9	Mcat	532.13	-0.359085	0.189361	1.89629	0.0579211	0.254222	-1.25146	-1.03618	-0.978035	-1.44607	-1.3554	-1.55543
ENSMUSG00000035342.14	Lzts2	1466.34	-0.380254	0.200606	1.89553	0.0580218	0.254276	-1.15091	-0.908599	-0.992553	-1.60411	-1.13592	-1.47056
ENSMUSG00000006673.14	Qrich1	2265.33	0.219412	0.115747	-1.89561	0.058012	0.254276	0.97194	0.631306	1.01133	1.08476	0.945989	1.19163
ENSMUSG00000042515.13	Pwwp3b	445.369	0.462508	0.243946	-1.89594	0.0579677	0.254276	1.55844	1.81726	2.09829	2.85191	2.07297	2.13448
ENSMUSG00000040848.11	Sft2d2	265.544	-0.431791	0.227982	1.89397	0.0582291	0.254874	-1.52925	-1.36297	-1.23439	-1.92107	-1.96907	-1.63997
ENSMUSG00000074925.4	Ptar1	517.309	0.399623	0.211012	-1.89384	0.0582468	0.254874	0.758215	0.171738	1.01734	1.18095	0.868992	1.09266
ENSMUSG00000019210.10	Atp6v1e1	2522.65	0.32863	0.17352	-1.89391	0.0582374	0.254874	-0.244376	0.142973	-0.181825	0.187486	0.204852	0.274646
ENSMUSG00000027163.13	Commd9	548.845	-0.37943	0.200525	1.89218	0.0584675	0.255664	-1.23991	-0.857136	-1.10878	-1.37254	-1.54422	-1.54751
ENSMUSG00000054452.10	Tle5	3456.26	-0.281549	0.148807	1.89203	0.0584865	0.255664	-2.39347	-2.24734	-2.37293	-2.8222	-2.31231	-2.74008
ENSMUSG00000074576.4	Mocs3	313.883	-0.418483	0.221395	1.89021	0.0587302	0.25634	0.135039	0.414159	0.299985	-0.017838	-0.0661643	-0.312767
ENSMUSG00000028060.14	Khdc4	882.871	-0.262569	0.138878	1.89064	0.0586724	0.25634	0.737976	0.696242	0.957414	0.463907	0.456663	0.654689
ENSMUSG00000015290.15	Ubl4a	1048.47	-0.276831	0.146453	1.89024	0.0587257	0.25634	-0.355365	-0.339845	-0.397639	-0.668895	-0.599875	-0.728679
ENSMUSG00000069114.8	Zbtb10	246.203	0.524454	0.277518	-1.8898	0.0587847	0.256447	2.0513	1.15075	1.77308	2.25992	1.85045	2.32906
ENSMUSG00000024900.5	Cpt1a	1232.46	0.30931	0.163711	-1.88937	0.058842	0.256568	0.535393	0.577554	0.449889	0.687582	0.704199	1.04715
ENSMUSG00000020248.18	Nfyb	331.795	0.367193	0.194495	-1.88793	0.0590359	0.257009	-0.163208	-0.327197	0.195943	0.562476	-0.0540236	0.275417
ENSMUSG00000020515.13	Cnot8	758.796	-0.287793	0.152487	1.88733	0.0591161	0.257009	-1.04719	-0.792105	-0.865971	-1.12357	-1.44403	-1.11716
ENSMUSG00000040359.14	Ufl1	542.676	0.408075	0.216223	-1.88729	0.059122	0.257009	1.59716	1.05445	1.43907	2.278	1.59744	1.51315
ENSMUSG00000021537.9	Cetn3	786.027	0.540912	0.286578	-1.88748	0.0590953	0.257009	0.39536	0.149293	0.403265	1.62957	0.533718	0.59129
ENSMUSG00000023092.16	Fhl1	8675.14	0.369554	0.195791	-1.88749	0.0590942	0.257009	0.382483	0.62186	0.669808	0.935698	0.884754	0.913529
ENSMUSG00000047434.14	Xxylt1	500.896	-0.312725	0.165611	1.8883	0.058985	0.257009	-0.16422	-0.298954	0.0307357	-0.637939	-0.592968	-0.183314
ENSMUSG00000035776.14	Cd99l2	699.289	-0.332176	0.176061	1.88672	0.0591985	0.257213	-1.02502	-1.094	-1.26964	-1.62695	-1.50223	-1.32357
ENSMUSG00000054455.5	Vapb	2613.17	-0.240799	0.127651	1.88638	0.0592437	0.257279	-1.2433	-1.10432	-1.26554	-1.51261	-1.40989	-1.44744
ENSMUSG00000055538.7	Zcchc24	792.811	-0.322753	0.171134	1.88596	0.0593002	0.257395	-1.28145	-1.35396	-1.47066	-1.86705	-1.44995	-1.74667
ENSMUSG00000005982.14	Naa60	332.234	-0.413379	0.219284	1.88513	0.0594118	0.25775	-0.941192	-1.12815	-0.771997	-1.62037	-1.54116	-1.0558
ENSMUSG00000032526.11	Ss18l2	295.093	0.369587	0.196099	-1.88469	0.0594717	0.25788	0.785227	0.757345	1.12439	1.17578	1.23651	1.36473
ENSMUSG00000018537.16	Pcgf2	510.487	-0.346808	0.184061	1.8842	0.0595378	0.257907	-0.747639	-0.924901	-1.07573	-1.48033	-1.08587	-1.28323
ENSMUSG00000027433.5	Xrn2	2765.66	0.311376	0.16525	-1.88427	0.0595279	0.257907	0.717387	0.493495	0.655624	1.26814	0.714828	0.821593
ENSMUSG00000030513.14	Pcsk6	599.946	-0.392911	0.208676	1.88287	0.0597174	0.258555	0.531456	0.483298	0.383965	-0.121787	0.0996776	0.260529
ENSMUSG00000018677.9	Slc25a39	1977.76	-0.296419	0.15748	1.88227	0.0598	0.258691	-2.55987	-2.47711	-2.87005	-3.08126	-2.67918	-3.01567
ENSMUSG00000028830.14	AU040320	563.149	-0.295134	0.15682	1.882	0.059836	0.258691	0.0310621	-0.166075	-0.0663283	-0.642345	-0.143474	-0.32183
ENSMUSG00000020841.5	Cpd	2338.25	0.452789	0.240592	-1.88198	0.0598386	0.258691	2.5241	1.81651	2.17538	2.73897	2.36879	2.65723
ENSMUSG00000046822.13	Slc39a3	350.325	-0.452207	0.240326	1.88164	0.0598853	0.258763	-1.24959	-1.23505	-1.34285	-2.14524	-1.12051	-1.87743
ENSMUSG00000046186.8	Cd109	5092.98	0.467165	0.248349	-1.88109	0.0599602	0.258957	2.74689	1.72909	2.36959	3.01034	2.4024	2.739
ENSMUSG00000047414.6	Flrt2	3045.64	0.416201	0.221358	-1.88022	0.0600778	0.259122	1.2501	0.571672	1.10892	1.72623	0.990186	1.41218
[truncated: 6,630 more rows]

## Sheet: TE_Pelo
gene_id	external_gene_name	baseMean	log2FoldChange	lfcSE	stat	pvalue	padj	log2_Cre_control_fibro_Pelo_batch_1_TE	log2_Cre_control_fibro_Pelo_batch_2_TE	log2_Cre_control_fibro_Pelo_batch_3_TE	log2_Pelo_fibro_1_TE	log2_Pelo_fibro_2_TE
ENSMUSG00000022483.17	Col2a1	5268.49	-4.03651	0.199128	20.2709	2.3223e-91	3.2064e-87	1.04388	0.937589	0.671283	-2.97048	-3.31488
ENSMUSG00000035373.2	Ccl7	2679.33	4.47965	0.225974	-19.8237	1.85758e-87	1.28238e-83	1.37527	1.06844	1.37496	5.80174	5.71889
ENSMUSG00000046364.14	Rpl27a	9873.37	4.86188	0.247023	-19.6819	3.0794e-86	1.41724e-82	-8.19209	-7.89442	-7.93351	-3.31076	-2.99918
ENSMUSG00000021832.8	Psmc6	3226.35	2.23114	0.124406	-17.9344	6.3521e-72	2.19259e-68	1.19057	1.06695	1.27009	3.34357	3.4971
ENSMUSG00000035385.5	Ccl2	6532.53	4.89033	0.287839	-16.9898	9.76661e-65	2.69695e-61	2.07808	1.42904	1.8085	7.01373	6.26809
ENSMUSG00000073411.12	H2-D1	930.022	3.10905	0.187915	-16.545	1.74052e-61	4.00523e-58	-0.468078	-0.415006	-0.819332	2.57498	2.53474
ENSMUSG00000046718.8	Bst2	1739.94	3.88238	0.237484	-16.348	4.49736e-60	8.87073e-57	1.14432	1.00417	1.25884	5.0454	4.97533
ENSMUSG00000024079.4	Eif2ak2	650.931	3.2556	0.201462	-16.1598	9.68346e-59	1.67124e-55	0.922474	0.670547	1.02446	4.06957	4.20908
ENSMUSG00000026896.14	Ifih1	565.405	5.08424	0.318882	-15.9439	3.13874e-57	4.81517e-54	1.76143	0.709438	1.5707	6.39521	6.38031
ENSMUSG00000040033.16	Stat2	654.796	3.1955	0.203773	-15.6817	2.01829e-55	2.78665e-52	0.17419	0.235893	0.498656	3.58828	3.42681
ENSMUSG00000010358.13	Ifi35	642.431	3.00226	0.194626	-15.4258	1.0978e-53	1.37794e-50	0.277227	0.34252	-0.0945976	3.24658	3.07625
ENSMUSG00000047735.14	Samd9l	542.944	6.30084	0.413516	-15.2372	2.00185e-52	2.30329e-49	2.09892	1.01664	1.89045	7.76044	8.17983
ENSMUSG00000046879.7	Irgm1	1462.44	2.34731	0.155641	-15.0816	2.13998e-51	2.27283e-48	0.314492	0.12993	0.407395	2.63084	2.64666
ENSMUSG00000029322.12	Plac8	857.903	3.05504	0.203449	-15.0162	5.7487e-51	5.66945e-48	0.632618	0.0504206	0.456936	3.69146	3.19588
ENSMUSG00000061232.16	H2-K1	666.147	3.72869	0.249243	-14.9601	1.33877e-50	1.23229e-47	0.235317	-0.407837	0.134421	3.64495	3.79092
ENSMUSG00000033880.11	Lgals3bp	3061.81	3.80318	0.256448	-14.8302	9.34762e-50	8.06641e-47	2.01938	1.23942	1.60107	5.3179	5.47905
ENSMUSG00000014226.10	Cacybp	1229.86	2.19497	0.155744	-14.0935	4.16577e-45	3.38334e-42	-0.454557	-0.741517	-0.590996	1.43904	1.76743
ENSMUSG00000027580.17	Helz2	940.642	2.50946	0.179674	-13.9667	2.48781e-44	1.90829e-41	1.03508	0.705039	0.844405	3.4265	3.27576
ENSMUSG00000028270.12	Gbp2	401.721	4.33408	0.313045	-13.8449	1.36528e-43	9.92124e-41	0.303562	0.752013	0.381478	4.98948	4.53188
ENSMUSG00000072620.3	Slfn2	353.122	3.06036	0.222784	-13.7369	6.10402e-43	4.21391e-40	-0.413582	-1.01819	-0.569361	2.40974	2.4111
ENSMUSG00000026104.14	Stat1	1503.11	3.14488	0.236144	-13.3177	1.82717e-40	1.20132e-37	2.67611	2.06132	2.3205	5.59644	5.33644
ENSMUSG00000021025.8	Nfkbia	1410.41	2.2293	0.169252	-13.1715	1.28072e-39	8.03765e-37	0.290924	0.288368	0.234958	2.74227	2.24579
ENSMUSG00000034205.16	Loxl2	5959.9	-2.30417	0.176542	13.0517	6.21628e-39	3.73166e-36	-1.52613	-1.57319	-1.62246	-3.86126	-3.87672
ENSMUSG00000033355.6	Rtp4	292.096	6.4819	0.499936	-12.9655	1.92061e-38	1.10491e-35	1.16339	0.274925	0.809671	6.78279	8.14123
ENSMUSG00000029371.7	Cxcl5	1091.08	6.85117	0.528671	-12.9592	2.08308e-38	1.15044e-35	2.72175	1.71804	3.07249	9.46452	9.32269
ENSMUSG00000074896.3	Ifit3	151.488	6.55532	0.507763	-12.9102	3.9432e-38	2.09399e-35	-1.80908	-1.32912	-0.261809	5.68861	5.32877
ENSMUSG00000040046.14	Tph1	286.157	-3.64665	0.284684	12.8095	1.45089e-37	7.4194e-35	0.184764	0.259068	0.174041	-3.42605	-3.42222
ENSMUSG00000027832.5	Ptx3	2947.71	3.40966	0.2698	-12.6378	1.30736e-36	6.44667e-34	2.06604	2.23979	2.40732	5.94775	5.28478
ENSMUSG00000041827.15	Oasl1	259.778	4.86611	0.387433	-12.5599	3.5095e-36	1.67088e-33	0.960303	-0.524916	0.638655	5.54405	4.77327
ENSMUSG00000068882.13	Ssb	2798.06	2.08698	0.167781	-12.4387	1.61154e-35	7.41684e-33	1.14636	0.86017	1.31111	3.05381	3.3728
ENSMUSG00000040296.15	Ddx58	1343.65	2.6492	0.213534	-12.4065	2.41076e-35	1.07372e-32	1.10332	0.39289	0.871495	3.46104	3.39463
ENSMUSG00000022337.7	Emc2	570.776	2.32295	0.188149	-12.3463	5.09799e-35	2.13297e-32	0.920481	0.599139	0.80612	3.13859	3.0456
ENSMUSG00000024338.15	Psmb8	215.153	4.78232	0.38733	-12.3469	5.06324e-35	2.13297e-32	0.919812	0.810162	0.333209	5.61438	5.41387
ENSMUSG00000043716.13	Rpl7	7319.22	1.72469	0.140592	-12.2673	1.3566e-34	5.50899e-32	-3.12176	-3.16973	-3.07977	-1.28833	-1.49158
ENSMUSG00000027206.13	Cops2	1917.43	2.43096	0.198754	-12.231	2.12332e-34	8.37619e-32	0.756071	0.496323	0.984483	3.01955	3.41228
ENSMUSG00000022336.3	Eif3e	3696.76	1.89942	0.155677	-12.201	3.06907e-34	1.17707e-31	-0.41295	-0.479676	-0.177288	1.48956	1.62345
ENSMUSG00000057143.15	Trim12c	128.427	4.32968	0.355424	-12.1817	3.88994e-34	1.45158e-31	-0.169389	0.186564	0.199202	4.209	4.63837
ENSMUSG00000052776.10	Oas1a	156.838	5.98671	0.491658	-12.1766	4.14393e-34	1.50567e-31	0.60381	-1.37756	-0.401129	5.52997	5.29354
ENSMUSG00000049502.17	Dtx3l	387.792	4.04495	0.332464	-12.1666	4.68371e-34	1.65815e-31	1.67533	0.709969	1.39961	5.16146	5.3418
ENSMUSG00000024803.9	Ankrd1	6067.68	-2.29172	0.188588	12.152	5.59863e-34	1.93251e-31	0.0840148	0.558567	0.429107	-2.10912	-1.76515
ENSMUSG00000020572.8	Nampt	694.53	2.14697	0.176761	-12.1461	6.01424e-34	2.02533e-31	0.889228	0.660285	0.974474	2.99872	2.9938
ENSMUSG00000078853.8	Igtp	258.205	5.32747	0.440626	-12.0907	1.18288e-33	3.88859e-31	0.531528	1.24411	0.447749	6.19779	5.53471
ENSMUSG00000037563.15	Rps16	7568.86	2.88278	0.239467	-12.0383	2.23435e-33	7.17433e-31	-8.09552	-7.72048	-8.80277	-5.04731	-5.53263
ENSMUSG00000004655.5	Aqp1	787.351	2.46445	0.205837	-11.9728	4.93283e-33	1.5479e-30	-0.262693	-0.00893864	-0.399071	2.30718	2.16576
ENSMUSG00000035929.11	H2-Q4	263.01	4.63977	0.392219	-11.8295	2.74648e-32	8.42682e-30	1.49374	1.1895	0.475157	5.93295	5.19974
ENSMUSG00000026725.17	Tnn	698.024	3.04547	0.257799	-11.8134	3.32937e-32	9.99317e-30	2.14258	1.38046	1.08928	4.54802	4.34727
ENSMUSG00000029380.11	Cxcl1	206.003	6.21036	0.526575	-11.7939	4.19844e-32	1.23336e-29	0.88368	0.0593875	1.02157	6.68016	7.22707
ENSMUSG00000039756.12	Dnttip2	1420.69	2.09162	0.177655	-11.7735	5.34405e-32	1.53719e-29	0.692474	0.753979	1.13536	2.75308	3.19819
ENSMUSG00000060802.8	B2m	11905	1.19687	0.102069	-11.7261	9.36324e-32	2.63833e-29	1.7544	1.60105	1.64974	2.89988	2.84053
ENSMUSG00000021116.10	Eif2s1	2342.17	1.40765	0.120082	-11.7224	9.78487e-32	2.702e-29	-1.00746	-1.04266	-0.989138	0.280771	0.524608
ENSMUSG00000028268.14	Gbp3	195.381	6.99526	0.600495	-11.6492	2.31713e-31	6.27306e-29	0.649493	0.674093	0.132257	7.1585	7.78273
ENSMUSG00000020949.9	Fkbp3	1621.57	2.07244	0.17858	-11.6051	3.88289e-31	1.03098e-28	1.52868	1.45209	1.577	3.76307	3.41619
ENSMUSG00000022044.14	Stmn4	287.859	-2.5632	0.222944	11.4971	1.36451e-30	3.55468e-28	0.00166205	-0.0914982	0.308197	-2.65618	-2.30068
ENSMUSG00000032135.15	Mcam	5727.94	-1.63613	0.14324	11.4223	3.23718e-30	8.27699e-28	1.01751	1.08779	0.957833	-0.659241	-0.556658
ENSMUSG00000066551.12	Hmgb1	495.323	2.31921	0.203847	-11.3772	5.43033e-30	1.33887e-27	-2.76652	-3.25609	-3.05214	-0.660035	-0.74854
ENSMUSG00000060519.11	Tor3a	362.366	2.94012	0.258394	-11.3784	5.35571e-30	1.33887e-27	0.25163	0.0464562	-0.160776	3.1798	2.76721
ENSMUSG00000030521.11	Mphosph10	721.903	2.22639	0.195806	-11.3704	5.87049e-30	1.422e-27	0.799984	0.602706	0.906157	2.79876	3.24293
ENSMUSG00000026222.16	Sp100	124.369	5.73981	0.505134	-11.3629	6.39585e-30	1.52254e-27	0.694839	-1.29399	0.428502	5.57538	5.92023
ENSMUSG00000024308.15	Tapbp	1003.03	1.84998	0.163373	-11.3237	1.00166e-29	2.34405e-27	0.925254	0.858861	0.678276	2.72341	2.62093
ENSMUSG00000069793.12	Slfn9	308.529	4.41007	0.390368	-11.2972	1.35457e-29	3.1171e-27	1.07324	0.297656	1.06317	4.98458	5.64533
ENSMUSG00000022110.13	Sucla2	1530.25	1.76712	0.156638	-11.2816	1.61764e-29	3.66145e-27	0.683193	0.685879	0.899502	2.34799	2.73191
ENSMUSG00000031626.18	Sorbs2	816.392	-2.2463	0.200246	11.2177	3.33884e-29	7.43538e-27	0.787837	1.06749	0.97336	-1.3401	-1.23166
ENSMUSG00000021537.9	Cetn3	683.171	1.94209	0.173351	-11.2032	3.93055e-29	8.61415e-27	0.352558	0.254128	0.291833	2.12258	2.37829
ENSMUSG00000038507.6	Parp12	647.616	2.77578	0.248072	-11.1894	4.59416e-29	9.91119e-27	0.813515	0.116538	0.428363	3.28607	3.15166
ENSMUSG00000024049.15	Myom1	621.498	-2.50587	0.224238	11.1751	5.40166e-29	1.1474e-26	0.356726	0.340053	0.167009	-2.53914	-1.94052
ENSMUSG00000024164.15	C3	187.228	4.99722	0.448571	-11.1403	7.98465e-29	1.6543e-26	1.3578	0.44803	0.129386	4.94344	6.49781
ENSMUSG00000045624.15	Esf1	829.093	2.14799	0.192821	-11.1398	8.02769e-29	1.6543e-26	1.28603	0.813877	1.17702	3.01498	3.52694
ENSMUSG00000031762.7	Mt2	451.556	2.713	0.244395	-11.1009	1.24228e-28	2.52238e-26	1.23863	1.56212	1.31501	4.12075	4.09468
ENSMUSG00000053289.8	Ddx10	596.995	2.12963	0.192277	-11.0758	1.64324e-28	3.28815e-26	0.904386	0.495956	0.692364	2.63028	3.06914
ENSMUSG00000031447.7	Lamp1	16154.4	-1.13	0.102743	10.9983	3.89508e-28	7.68276e-26	0.888437	0.773778	0.894654	-0.272754	-0.269166
ENSMUSG00000034765.6	Dusp5	1742.26	-1.34913	0.122888	10.9786	4.84464e-28	9.42112e-26	0.0634623	0.0513191	0.0210901	-1.39239	-1.20377
ENSMUSG00000039239.14	Tgfb2	1312.22	-1.98071	0.18096	10.9455	6.981e-28	1.3387e-25	1.44869	1.18997	1.53044	-0.44423	-0.73124
ENSMUSG00000064357.1	mt-Atp6	490.744	2.54825	0.233198	-10.9274	8.52473e-28	1.61234e-25	-2.85397	-2.56168	-1.98377	0.042971	0.200036
ENSMUSG00000020076.7	Ddx50	653.369	1.66928	0.153239	-10.8933	1.24096e-27	2.31539e-25	-0.312824	-0.44188	-0.321049	1.33744	1.29248
ENSMUSG00000074656.12	Eif2s2	1969.46	2.14143	0.19747	-10.8443	2.12253e-27	3.90744e-25	-1.38057	-1.66106	-1.37221	0.592514	0.79651
ENSMUSG00000022548.14	Apod	159.976	4.62362	0.432422	-10.6924	1.10506e-26	2.00758e-24	0.628636	0.336231	0.551268	4.93966	5.23211
ENSMUSG00000021798.14	Ldb3	244.037	-2.48938	0.232935	10.687	1.17089e-26	2.09955e-24	0.84609	0.827951	0.872729	-1.8235	-1.4733
ENSMUSG00000007850.16	Hnrnph1	4471.8	1.78849	0.168048	-10.6427	1.88525e-26	3.33713e-24	1.18818	0.801059	1.18158	2.72203	3.00722
ENSMUSG00000031897.9	Psmb10	389.47	2.22074	0.209068	-10.6221	2.35197e-26	4.11058e-24	-0.750894	-0.681856	-1.12641	1.42885	1.3048
ENSMUSG00000031197.11	Vbp1	802.176	1.93563	0.182302	-10.6177	2.46582e-26	4.2557e-24	0.211013	0.260789	0.494074	2.10359	2.46191
ENSMUSG00000026234.12	Ncl	16690.3	1.59684	0.151402	-10.547	5.24358e-26	8.93803e-24	0.471224	0.174261	0.433398	1.8229	2.11418
ENSMUSG00000037321.17	Tap1	697.636	1.99749	0.189835	-10.5222	6.82528e-26	1.14923e-23	0.79594	0.776464	0.842866	2.98744	2.6149
ENSMUSG00000057113.13	Npm1	6800.27	2.10293	0.200374	-10.495	9.10514e-26	1.51463e-23	-2.06108	-2.24844	-1.99	-0.196153	0.272845
ENSMUSG00000035692.7	Isg15	1842.29	6.52129	0.623279	-10.4629	1.2791e-25	2.10244e-23	1.24055	0.058839	1.12083	7.35319	7.48972
ENSMUSG00000020638.8	Cmpk2	109.437	5.50094	0.525993	-10.4582	1.34409e-25	2.18327e-23	-0.087473	-0.239648	0.393715	5.62754	5.44183
ENSMUSG00000020664.10	Dld	2022.84	1.62901	0.15609	-10.4363	1.69195e-25	2.71637e-23	0.870073	0.772911	0.975269	2.35415	2.69855
ENSMUSG00000030061.16	Uba3	1382.78	1.5966	0.153275	-10.4166	2.08338e-25	3.30635e-23	0.729241	0.559986	0.812203	2.27189	2.34613
ENSMUSG00000028776.14	Tinagl1	7174.1	-2.24431	0.215838	10.3981	2.528e-25	3.96637e-23	-0.303698	0.359267	0.00263211	-2.26915	-2.1675
ENSMUSG00000116564.1	Riok2	764.164	1.72039	0.165661	-10.385	2.90031e-25	4.4994e-23	1.02976	0.925008	0.977115	2.55837	2.88773
ENSMUSG00000069874.7	Irgm2	214.591	4.37696	0.422095	-10.3696	3.40869e-25	5.22931e-23	1.22334	0.285404	0.381308	4.90171	4.79537
ENSMUSG00000001123.15	Lgals9	2536.84	1.45835	0.141227	-10.3263	5.35918e-25	8.13124e-23	0.142386	0.23977	0.119086	1.71931	1.53018
ENSMUSG00000020464.15	Pnpt1	779	2.23329	0.216867	-10.2979	7.19793e-25	1.08024e-22	1.17536	0.917535	1.62793	3.40018	3.6103
ENSMUSG00000032596.14	Uba7	119.331	3.99823	0.38843	-10.2933	7.55343e-25	1.1214e-22	0.547044	-0.317823	-0.241701	3.95333	3.94487
ENSMUSG00000031231.4	Cox7b	1446.54	1.52002	0.147724	-10.2896	7.84776e-25	1.1527e-22	-0.159737	-0.191972	0.0206713	1.45497	1.3802
ENSMUSG00000027306.15	Nusap1	490.254	2.44452	0.237815	-10.2791	8.75335e-25	1.27218e-22	1.17908	0.891359	1.14467	3.49689	3.52368
ENSMUSG00000020875.9	Hoxb9	854.421	-1.63481	0.159316	10.2614	1.05155e-24	1.51238e-22	-1.48226	-1.52477	-1.54926	-3.22104	-3.07141
ENSMUSG00000030107.10	Usp18	640.942	6.60741	0.646006	-10.2281	1.48409e-24	2.09089e-22	0.451917	-0.293992	1.26479	7.191	7.34417
ENSMUSG00000029014.14	Dnajc2	614.969	1.65179	0.161487	-10.2286	1.4759e-24	2.09089e-22	-0.517545	-0.553474	-0.289947	1.07188	1.3483
ENSMUSG00000030768.12	Disp1	1140.71	-1.64339	0.160849	10.217	1.66445e-24	2.32133e-22	0.467414	0.496972	0.428257	-1.10221	-1.23071
ENSMUSG00000037236.16	Matr3	1388.43	1.98285	0.195255	-10.1552	3.14174e-24	4.3378e-22	1.21229	0.989102	1.38358	2.92143	3.51916
ENSMUSG00000025492.6	Ifitm3	6974.59	2.56262	0.252537	-10.1475	3.39911e-24	4.64668e-22	0.664324	-0.0658258	0.296917	2.81042	2.93319
ENSMUSG00000027787.14	Nmd3	1579.03	1.53217	0.151449	-10.1168	4.6549e-24	6.301e-22	0.808855	0.761814	1.03836	2.28246	2.55068
ENSMUSG00000020467.15	Efemp1	2713.73	-1.57831	0.156075	10.1125	4.86327e-24	6.51914e-22	2.09969	2.452	2.4502	0.887032	0.639553
ENSMUSG00000022329.15	Stk3	548.937	1.82966	0.181751	-10.0668	7.74304e-24	1.02796e-21	0.871434	0.73504	0.85532	2.47612	2.85724
ENSMUSG00000034349.14	Smc4	1944.72	2.12037	0.211196	-10.0398	1.01871e-23	1.33955e-21	1.6586	1.00147	1.63549	3.50626	3.63637
ENSMUSG00000016018.4	Mtrex	1776.33	1.68307	0.167828	-10.0285	1.14211e-23	1.48765e-21	1.03998	0.846224	1.14863	2.53933	2.89883
ENSMUSG00000020863.15	Luc7l3	871.954	1.94547	0.194066	-10.0247	1.1866e-23	1.51698e-21	1.18277	0.748422	1.14243	2.8558	3.11576
ENSMUSG00000031119.4	Gpc4	11297.9	-1.65202	0.164791	10.0249	1.18457e-23	1.51698e-21	1.96557	2.00406	2.21795	0.457856	0.375443
ENSMUSG00000031939.16	Taf1d	514.104	1.72527	0.172227	-10.0174	1.27785e-23	1.61865e-21	-2.11789	-2.31054	-2.00995	-0.291192	-0.542359
ENSMUSG00000030157.5	Clec2d	244.359	2.51165	0.251034	-10.0052	1.44597e-23	1.81496e-21	-0.333628	-0.824601	-0.366706	2.09464	1.90399
ENSMUSG00000000581.8	C1d	528.165	1.84164	0.184792	-9.96601	2.14671e-23	2.67023e-21	0.290309	0.161918	0.484914	1.98124	2.35852
ENSMUSG00000029486.13	Mrpl1	379.964	2.10184	0.211038	-9.95957	2.29046e-23	2.8236e-21	1.21169	0.773698	1.14563	3.07649	3.22768
ENSMUSG00000026564.9	Dusp27	162.093	-3.70523	0.372192	9.95518	2.39398e-23	2.92511e-21	-0.180721	0.4498	0.0498102	-4.19256	-3.19646
ENSMUSG00000026020.9	Nop58	3319.98	1.70002	0.170868	-9.94928	2.54007e-23	3.07638e-21	0.859156	0.540982	0.915242	2.31277	2.6761
ENSMUSG00000029121.16	Crmp1	516.391	-2.32238	0.233672	9.93866	2.82609e-23	3.39303e-21	-0.573216	0.0912271	-0.319871	-2.67481	-2.46672
ENSMUSG00000019302.16	Atp6v0a1	1544.45	-1.47248	0.148236	9.9334	2.97926e-23	3.54609e-21	0.137027	0.330617	0.124211	-1.26977	-1.25395
ENSMUSG00000030921.17	Trim30a	116.3	5.36772	0.541049	-9.92097	3.37475e-23	3.98249e-21	-0.158537	-0.535355	0.294156	5.00208	5.8411
ENSMUSG00000029798.11	Herc6	223.608	4.47276	0.450971	-9.91807	3.47403e-23	4.06491e-21	2.62242	1.62319	2.03384	7.04009	5.91357
ENSMUSG00000028212.16	Ccne2	566.833	2.30277	0.232977	-9.88408	4.88025e-23	5.66232e-21	1.23719	0.9608	1.34969	3.27662	3.7415
ENSMUSG00000045932.12	Ifit2	216.339	2.80312	0.284823	-9.84163	7.44962e-23	8.57141e-21	0.857524	0.594172	0.86583	3.69993	3.405
ENSMUSG00000008682.13	Rpl10	7160.61	1.68457	0.171184	-9.84069	7.51957e-23	8.58039e-21	-6.73175	-6.18431	-6.56101	-4.83817	-4.74313
ENSMUSG00000014602.15	Kif1a	4319.71	-1.59666	0.162299	9.83776	7.74178e-23	8.76154e-21	-0.214552	-0.126987	-0.457309	-1.9136	-1.78798
ENSMUSG00000054690.17	Emcn	224.737	-3.63917	0.370865	9.81265	9.93292e-23	1.11499e-20	0.737333	0.207594	1.19106	-3.84836	-2.41895
ENSMUSG00000037805.15	Rpl10a	5923.4	1.74345	0.177799	-9.80574	1.06367e-22	1.18436e-20	-6.51722	-6.19946	-6.27449	-4.6293	-4.53429
ENSMUSG00000075602.10	Ly6a	744.19	2.20987	0.225943	-9.78067	1.36311e-22	1.50564e-20	0.221468	0.366008	0.16363	2.64313	2.22218
ENSMUSG00000035171.9	1110059E24Rik	231.267	2.31564	0.236891	-9.77512	1.43993e-22	1.57786e-20	-0.535303	-0.795177	-0.499288	1.6767	1.74999
ENSMUSG00000022322.8	Shcbp1	526.283	2.54075	0.260748	-9.74408	1.95542e-22	2.12586e-20	1.79788	1.21843	1.78512	4.0088	4.32532
ENSMUSG00000029422.15	Rsrc2	448.175	1.90231	0.195668	-9.72214	2.42624e-22	2.59683e-20	0.364336	0.0524106	0.493373	2.041	2.41943
ENSMUSG00000017830.15	Dhx58	107.291	5.32364	0.547537	-9.72288	2.40871e-22	2.59683e-20	0.426425	-1.047	-0.85077	4.94043	4.46291
ENSMUSG00000027078.14	Ube2l6	388.132	2.16511	0.223246	-9.69833	3.06468e-22	3.25493e-20	-1.04609	-0.755815	-1.04672	1.09322	1.37504
ENSMUSG00000024974.10	Smc3	1424.22	1.933	0.199951	-9.66741	4.14752e-22	4.37136e-20	1.39355	0.909378	1.33587	2.9083	3.44383
ENSMUSG00000026946.9	Nmi	116.185	3.59005	0.371598	-9.66112	4.41034e-22	4.61315e-20	0.761432	0.543029	0.708739	4.23701	4.17824
ENSMUSG00000021270.13	Hsp90aa1	7717.79	2.25445	0.233632	-9.64956	4.93664e-22	5.12482e-20	-1.97883	-2.13402	-2.05463	-0.161675	0.682756
ENSMUSG00000031954.6	Cfdp1	1438.3	1.50428	0.156117	-9.63561	5.65532e-22	5.82535e-20	-0.166628	-0.394864	-0.230962	1.12987	1.37359
ENSMUSG00000022247.12	Brix1	1448.33	1.29596	0.134507	-9.63488	5.69583e-22	5.82535e-20	1.08801	0.865755	1.12737	2.3744	2.28387
ENSMUSG00000026377.12	Nifk	1207.38	1.50783	0.156709	-9.62181	6.46819e-22	6.56664e-20	0.234685	0.0931293	0.242972	1.61969	1.80279
ENSMUSG00000090553.8	Snrpe	754.751	1.73823	0.180826	-9.61273	7.06474e-22	7.11991e-20	-1.17474	-1.02559	-1.06687	0.821123	0.487875
ENSMUSG00000041057.10	Wdr43	1966.71	1.36946	0.142486	-9.6112	7.17059e-22	7.17423e-20	0.723041	0.308301	0.663842	1.88788	1.998
ENSMUSG00000024287.8	Thoc1	744.785	1.82329	0.189744	-9.60921	7.31077e-22	7.26186e-20	1.2204	1.18668	1.53519	2.98626	3.36273
ENSMUSG00000031740.8	Mmp2	7681.66	-1.56321	0.163244	9.5759	1.00969e-21	9.95772e-20	1.00245	1.13663	0.896072	-0.40499	-0.670414
ENSMUSG00000027070.14	Lrp2	885.638	-2.05796	0.215205	9.5628	1.14617e-21	1.12235e-19	3.43274	3.47431	3.48371	1.42589	1.42688
ENSMUSG00000012422.14	Tmem167	782.491	1.58141	0.167583	-9.43657	3.85197e-21	3.74536e-19	-1.78505	-1.90721	-1.59753	-0.146278	-0.201108
ENSMUSG00000027379.13	Bub1	790.65	2.15567	0.229185	-9.40582	5.16272e-21	4.98474e-19	1.30346	0.920069	1.5013	3.25005	3.62601
ENSMUSG00000038736.10	Nudcd1	957.057	1.56694	0.167188	-9.37234	7.09446e-21	6.80231e-19	1.20116	1.1624	1.35347	2.71162	2.94691
ENSMUSG00000042354.7	Gnl3	1626.88	1.38666	0.14812	-9.36173	7.84395e-21	7.46907e-19	0.739872	0.479869	0.759765	2.01815	2.1017
ENSMUSG00000023960.13	Enpp5	431.464	-1.74128	0.186174	9.353	8.51995e-21	8.05719e-19	1.70702	1.63481	1.8928	-0.047339	0.0930957
ENSMUSG00000026775.9	Yme1l1	2759.97	1.78763	0.191251	-9.34703	9.01454e-21	8.40972e-19	1.63599	1.43889	1.92507	3.26547	3.71554
ENSMUSG00000039221.10	Rpl22l1	934.116	1.89852	0.203105	-9.34751	8.97324e-21	8.40972e-19	-0.821248	-0.516503	-0.553263	1.48376	1.03826
ENSMUSG00000037531.8	Mrpl47	405.107	1.66292	0.178046	-9.33982	9.64938e-21	8.94154e-19	0.528481	0.520716	0.64959	2.18187	2.28555
ENSMUSG00000019889.10	Ptprk	1160.98	-1.52067	0.162854	9.33766	9.84845e-21	9.06517e-19	1.60826	1.40265	1.57704	-0.0964576	0.117659
ENSMUSG00000042133.16	Ppig	719.039	1.82199	0.195207	-9.33363	1.02304e-20	9.3544e-19	0.153622	-0.485587	-0.101723	1.49051	1.89239
ENSMUSG00000013736.16	Trnt1	701.04	1.58628	0.170552	-9.30084	1.39336e-20	1.26055e-18	1.20971	0.815816	1.1593	2.59884	2.71524
ENSMUSG00000063268.12	Parp10	133.023	3.17803	0.341703	-9.30058	1.39686e-20	1.26055e-18	-0.576107	-0.495821	0.098709	2.68227	3.1659
ENSMUSG00000071172.13	Srsf3	1664.36	1.36189	0.146647	-9.28687	1.58889e-20	1.42453e-18	-3.94231	-3.97123	-3.82013	-2.53145	-2.55547
ENSMUSG00000013076.17	Amotl1	3683.52	-1.21267	0.130769	9.27336	1.80369e-20	1.60668e-18	-0.755972	-1.01142	-0.841366	-2.1523	-2.00393
ENSMUSG00000021591.8	Glrx	334.856	2.12647	0.229666	-9.25894	2.06466e-20	1.82735e-18	-0.349692	-0.356501	-0.348596	1.89387	1.62675
ENSMUSG00000022321.15	Cdh10	267.251	-2.56599	0.277615	9.24297	2.39744e-20	2.10837e-18	1.74974	1.16732	1.82992	-1.22125	-0.755307
ENSMUSG00000024081.9	Cebpz	1094.31	1.44586	0.156602	-9.23268	2.63953e-20	2.29208e-18	0.738223	0.512496	0.89608	2.11434	2.24184
ENSMUSG00000028312.19	Smc2	1524.6	1.82845	0.198038	-9.23282	2.6361e-20	2.29208e-18	1.82491	1.32941	1.91975	3.38274	3.69577
ENSMUSG00000030966.13	Trim21	125.485	3.30087	0.35757	-9.23138	2.67173e-20	2.30554e-18	0.595312	0.603377	0.695365	4.38881	3.54865
ENSMUSG00000038274.13	Fau	4425.87	1.53977	0.167484	-9.19356	3.80063e-20	3.25934e-18	-5.99367	-5.87846	-6.08196	-4.4899	-4.39375
ENSMUSG00000038539.15	Atf5	3348.44	1.93729	0.211663	-9.15271	5.55224e-20	4.73209e-18	-2.42833	-2.69801	-3.07667	-1.00211	-0.617851
ENSMUSG00000035042.2	Ccl5	127.846	4.30782	0.47133	-9.13971	6.26202e-20	5.30428e-18	0.76184	-1.12176	0.176735	4.37717	3.96826
ENSMUSG00000028081.6	Rps3a1	8772.67	1.50708	0.165342	-9.11493	7.87209e-20	6.62744e-18	-5.86512	-5.60328	-5.99831	-4.14729	-4.46848
ENSMUSG00000072812.4	Ahnak2	2527.22	-1.94759	0.213817	9.10868	8.3391e-20	6.97806e-18	1.54623	0.869281	1.45433	-0.576097	-0.773087
ENSMUSG00000027714.11	Exosc9	821.549	1.57354	0.172974	-9.09699	9.28683e-20	7.72429e-18	1.11371	1.07281	1.12536	2.43411	2.95575
ENSMUSG00000072941.5	Sod3	230.161	3.34318	0.367839	-9.08872	1.00213e-19	8.28531e-18	1.33268	0.441444	0.303903	4.21088	3.58595
ENSMUSG00000068747.14	Sort1	581.49	-2.05266	0.22587	9.08779	1.01073e-19	8.30664e-18	0.628329	0.696861	0.473566	-1.41739	-1.43585
ENSMUSG00000035775.2	Krt20	347.32	-2.6897	0.297483	9.04152	1.54502e-19	1.25588e-17	-0.192124	0.570935	0.598308	-2.5947	-2.14367
ENSMUSG00000024501.20	Dpysl3	17963.5	-1.3774	0.152343	9.04143	1.54632e-19	1.25588e-17	0.0971396	0.0087277	0.107735	-1.44457	-1.16927
ENSMUSG00000024795.11	Kif20b	607.781	2.2792	0.252338	-9.03233	1.6805e-19	1.35688e-17	1.89041	1.51113	2.33829	4.10693	4.3483
ENSMUSG00000041360.8	Pum3	1980.61	1.11507	0.123707	-9.01378	1.99067e-19	1.59797e-17	0.342286	0.349111	0.274961	1.34704	1.53388
ENSMUSG00000039470.15	Zdhhc2	385.248	-2.11943	0.235171	9.0123	2.0178e-19	1.61039e-17	-1.20333	-1.21711	-0.927439	-3.45524	-3.03431
ENSMUSG00000040044.11	Orc3	774.71	1.55182	0.17228	-9.00753	2.10746e-19	1.67228e-17	0.770206	0.598375	0.807204	2.06991	2.53259
ENSMUSG00000063531.7	Sema3e	1593.75	-1.76712	0.196546	8.99088	2.45265e-19	1.93507e-17	1.98158	2.3487	2.21106	0.490103	0.367797
ENSMUSG00000015880.13	Ncapg	809.683	2.07144	0.230499	-8.98677	2.54599e-19	1.9973e-17	1.85024	1.45491	1.96443	3.71355	4.00437
ENSMUSG00000054404.13	Slfn5	115.013	5.24595	0.584831	-8.97002	2.96447e-19	2.31246e-17	2.06126	-0.0470032	1.07875	5.76129	7.09793
ENSMUSG00000026536.9	Ifi211	68.5144	5.12841	0.572073	-8.96461	3.11367e-19	2.41519e-17	-0.475447	-1.63878	-0.364469	5.01342	3.6112
ENSMUSG00000027680.15	Fxr1	2053.42	1.4101	0.15752	-8.95185	3.49583e-19	2.69647e-17	0.889142	0.616419	0.934107	2.03046	2.45423
ENSMUSG00000005846.12	Rsl1d1	3727.91	1.27231	0.142159	-8.94987	3.55896e-19	2.72992e-17	0.828269	0.654256	0.865547	1.93376	2.21043
ENSMUSG00000025525.12	Apool	358.258	1.99347	0.222753	-8.94921	3.58037e-19	2.73117e-17	0.841876	0.82752	1.24778	2.98012	2.9758
ENSMUSG00000002325.15	Irf9	419.818	2.92639	0.327876	-8.92529	4.44544e-19	3.37243e-17	0.442725	-0.514199	0.0578537	2.82087	3.01451
ENSMUSG00000035726.8	Supt16	2428.32	1.54237	0.173176	-8.9064	5.27169e-19	3.97739e-17	1.56869	1.07555	1.54267	2.84822	3.05283
ENSMUSG00000006678.6	Pola1	636.249	2.31058	0.261288	-8.84306	9.31321e-19	6.98845e-17	1.59199	0.751144	1.5804	3.54864	3.71304
ENSMUSG00000000275.16	Trim25	1148.44	2.30517	0.261543	-8.81372	1.21061e-18	9.00513e-17	1.34232	0.274706	0.812976	3.11588	3.06918
ENSMUSG00000040511.14	Pvr	2524.81	-1.32474	0.150308	8.81349	1.21312e-18	9.00513e-17	0.725007	0.674563	0.782339	-0.672263	-0.504405
ENSMUSG00000046434.16	Hnrnpa1	3521.98	1.44454	0.16397	-8.80978	1.25396e-18	9.25853e-17	-5.17895	-5.02667	-5.32575	-3.68248	-3.7629
ENSMUSG00000020357.3	Flt4	590.62	-1.57698	0.179519	8.78447	1.57108e-18	1.15383e-16	-0.00747183	-0.0498792	-0.148704	-1.66365	-1.59633
ENSMUSG00000063334.16	Krr1	499.351	1.8759	0.213664	-8.77967	1.63957e-18	1.19775e-16	0.752889	0.455006	0.653746	2.22866	2.8728
ENSMUSG00000040253.15	Gbp7	167.51	4.86241	0.55435	-8.77138	1.76491e-18	1.28253e-16	2.46179	1.20649	2.3597	6.87839	7.06968
ENSMUSG00000031878.18	Nae1	913.889	1.4087	0.160624	-8.7702	1.78353e-18	1.28928e-16	0.849483	0.788713	0.978703	2.13113	2.46959
ENSMUSG00000008333.12	Snrpb2	882.387	1.43685	0.16385	-8.76931	1.79766e-18	1.29272e-16	0.692973	0.465782	0.612504	2.00825	2.04805
ENSMUSG00000058355.8	Abce1	3115.58	1.83573	0.209365	-8.76807	1.81755e-18	1.30025e-16	0.455776	0.15847	0.632998	2.05566	2.52585
ENSMUSG00000012443.4	Kif11	1002.9	2.11357	0.241287	-8.75955	1.96024e-18	1.3951e-16	2.00191	1.25711	1.879	3.68903	4.00908
ENSMUSG00000038379.15	Ttk	332.051	2.28862	0.261546	-8.75034	2.1272e-18	1.50617e-16	1.53174	0.99849	1.50478	3.5745	3.7183
ENSMUSG00000022370.13	Mrpl13	935.993	1.48484	0.169936	-8.73765	2.3801e-18	1.66946e-16	0.0271888	0.0401296	0.160211	1.72825	1.39681
ENSMUSG00000003623.4	Crot	554.29	1.70983	0.195687	-8.73756	2.38201e-18	1.66946e-16	0.827132	0.918947	1.04326	2.60866	2.70043
ENSMUSG00000020124.10	Usp15	1565.63	1.39001	0.159138	-8.73465	2.44403e-18	1.70428e-16	0.90765	0.740857	0.995751	2.09648	2.49785
ENSMUSG00000045954.7	Cavin2	3344.09	1.04142	0.119483	-8.7161	2.87955e-18	1.99789e-16	1.02955	0.955942	1.14636	2.13614	2.04901
ENSMUSG00000027018.11	Hat1	1142.6	1.57251	0.180705	-8.70211	3.25772e-18	2.24896e-16	0.82951	0.740289	1.00795	2.38095	2.512
ENSMUSG00000025887.10	Casp12	157.008	4.22352	0.485444	-8.70033	3.30932e-18	2.27322e-16	1.74769	0.753075	1.29132	5.38965	5.55193
ENSMUSG00000018899.16	Irf1	315.019	2.56866	0.296333	-8.66814	4.39217e-18	3.00212e-16	0.48857	0.189525	0.387507	2.91058	2.92386
ENSMUSG00000020173.17	Cobl	359.237	-2.08068	0.240386	8.65559	4.90384e-18	3.33533e-16	0.445317	1.15975	0.650737	-1.30365	-1.3237
ENSMUSG00000025001.11	Hells	754.328	2.02221	0.234384	-8.62777	6.25572e-18	4.23396e-16	1.91939	1.10248	1.78809	3.53387	3.71205
ENSMUSG00000000001.4	Gnai3	2689.65	1.29336	0.150172	-8.61251	7.1477e-18	4.81407e-16	0.678489	0.495484	0.745141	1.76414	2.14286
ENSMUSG00000006445.3	Epha2	3764.49	-1.59166	0.18518	8.59517	8.31421e-18	5.57254e-16	0.998098	1.078	1.10123	-0.583519	-0.463924
ENSMUSG00000025650.13	Col7a1	1302.55	-1.74276	0.203147	8.57878	9.58813e-18	6.39533e-16	1.13484	1.29297	0.769361	-0.65841	-0.67505
ENSMUSG00000026385.16	Dbi	1966.42	1.29951	0.151678	-8.56755	1.0571e-17	7.017e-16	0.602228	0.719986	0.704882	2.01995	1.93251
ENSMUSG00000021822.3	Plau	2613.3	-1.18603	0.138577	8.55863	1.14219e-17	7.54557e-16	1.52973	1.35315	1.5199	0.256798	0.314911
ENSMUSG00000004980.16	Hnrnpa2b1	8408.67	0.986687	0.115321	-8.556	1.16856e-17	7.65032e-16	-0.23427	-0.390785	-0.257451	0.585079	0.811838
ENSMUSG00000032374.14	Plod2	4669.44	-1.25119	0.146237	8.55594	1.16913e-17	7.65032e-16	2.02166	1.89339	2.10848	0.738185	0.784847
ENSMUSG00000060938.14	Rpl26	5925.13	1.66918	0.195115	-8.55486	1.18016e-17	7.68607e-16	-2.95206	-3.09928	-2.97928	-1.03905	-1.59559
ENSMUSG00000057346.12	Apol9a	63.7857	4.474	0.524405	-8.53157	1.44376e-17	9.35866e-16	-0.970287	-2.23279	-2.38854	2.79737	2.23242
ENSMUSG00000026166.14	Ccl20	194.587	3.73528	0.437861	-8.53074	1.4541e-17	9.38168e-16	1.57137	0.749428	0.955841	4.74366	5.16728
ENSMUSG00000028676.17	Srsf10	509.839	1.46846	0.17224	-8.52567	1.51929e-17	9.75665e-16	-1.98533	-2.11911	-1.96294	-0.620641	-0.475244
ENSMUSG00000079197.10	Psme2	426.539	1.81944	0.213727	-8.51292	1.6961e-17	1.08417e-15	-2.19767	-2.50463	-2.35531	-0.492844	-0.564277
ENSMUSG00000021377.15	Dek	866.837	1.78447	0.20965	-8.51169	1.71421e-17	1.0907e-15	1.21111	0.644099	1.37818	2.73152	3.05043
ENSMUSG00000034981.9	Parm1	926.151	-2.30417	0.271112	8.49895	1.91308e-17	1.21164e-15	0.564638	1.24873	0.817413	-1.47792	-1.30572
ENSMUSG00000066842.18	Hmcn1	783.448	-2.28045	0.268523	8.49257	2.02111e-17	1.26843e-15	3.91466	3.71519	3.79268	1.88098	1.11043
ENSMUSG00000078453.3	Abracl	1357.83	1.1985	0.141115	-8.49308	2.01235e-17	1.26843e-15	-0.475783	-0.503357	-0.404995	0.774868	0.711398
ENSMUSG00000026249.10	Serpine2	7006.17	-0.996453	0.117438	8.48495	2.15805e-17	1.34824e-15	1.45113	1.37128	1.4309	0.537944	0.315769
ENSMUSG00000027804.13	Ppid	1189.15	1.11525	0.131522	-8.47959	2.25991e-17	1.40552e-15	-0.440428	-0.548106	-0.441344	0.601087	0.683412
ENSMUSG00000004535.12	Tax1bp1	2803.63	1.49551	0.176501	-8.4731	2.38944e-17	1.47942e-15	1.23103	1.07161	1.34307	2.50068	2.98619
ENSMUSG00000027951.16	Adar	938.035	1.34602	0.158975	-8.46691	2.51999e-17	1.55328e-15	0.750048	0.615753	0.803643	2.2278	1.9091
ENSMUSG00000078153.3	Psme2b	269.158	1.89789	0.22442	-8.45687	2.74646e-17	1.68535e-15	-0.46165	-0.357335	-0.444168	1.60863	1.32294
ENSMUSG00000031502.11	Col4a1	37415.8	-1.895	0.224511	8.44057	3.15789e-17	1.92925e-15	1.62876	1.34651	1.089	-0.506798	-0.567728
ENSMUSG00000026088.15	Mitd1	299.517	2.19897	0.26062	-8.43744	3.24354e-17	1.97284e-15	1.3178	0.981614	1.38259	3.4507	3.41386
ENSMUSG00000038774.9	Ascc3	1443.15	2.25978	0.268761	-8.40815	4.16543e-17	2.49382e-15	1.71703	1.17256	1.65304	3.41099	4.2585
ENSMUSG00000044303.6	Cdkn2a	901.552	-1.87399	0.222883	8.40795	4.17232e-17	2.49382e-15	0.347534	0.826073	0.587774	-1.15671	-1.42828
ENSMUSG00000021149.8	Gtpbp4	2013.39	1.0495	0.12482	-8.40809	4.16735e-17	2.49382e-15	0.403278	0.322734	0.456712	1.37985	1.53136
ENSMUSG00000009035.15	Tmem184b	2514.16	-0.949132	0.11288	8.40834	4.15871e-17	2.49382e-15	-0.204167	-0.314364	-0.29892	-1.13901	-1.29209
ENSMUSG00000025862.14	Stag2	1461.91	1.67028	0.198944	-8.39573	4.62991e-17	2.7554e-15	1.45161	1.1222	1.66824	2.92083	3.30782
ENSMUSG00000034459.8	Ifit1	897.538	6.10401	0.727262	-8.39313	4.7337e-17	2.80507e-15	1.80676	0.0687216	1.23951	7.10131	7.13133
ENSMUSG00000030894.5	Tpp1	3513.28	-1.26773	0.151068	8.39179	4.78784e-17	2.82503e-15	1.78526	1.70328	1.67548	0.541162	0.383298
ENSMUSG00000061315.14	Naca	3852.42	1.4059	0.167861	-8.37538	5.50481e-17	3.23425e-15	-2.93541	-2.94852	-2.6196	-1.5353	-1.29547
ENSMUSG00000036718.17	Micall2	804.83	1.44401	0.172462	-8.37292	5.62091e-17	3.28847e-15	-0.0741222	-0.383685	-0.547813	1.15232	1.05063
ENSMUSG00000024056.10	Ndc80	453.602	1.75227	0.209675	-8.35706	6.4301e-17	3.74601e-15	1.02679	0.715753	1.10339	2.59542	2.85029
ENSMUSG00000038296.14	Galnt18	3490.75	-1.25793	0.150581	8.35388	6.60557e-17	3.83206e-15	0.0472255	0.165742	0.0913587	-1.17341	-1.13371
ENSMUSG00000067873.11	Htatsf1	568.706	1.30273	0.156141	-8.34325	7.22778e-17	4.17548e-15	0.311294	0.199382	0.17915	1.46482	1.60584
ENSMUSG00000022240.10	Ctnnd2	358.684	-1.65925	0.198975	8.33899	7.49282e-17	4.31056e-15	0.683756	0.604743	0.484762	-1.05879	-1.06464
ENSMUSG00000029090.12	Adgra3	959.408	-1.34758	0.161718	8.3329	7.88864e-17	4.51944e-15	-0.76489	-0.851733	-0.694909	-1.94389	-2.28342
ENSMUSG00000059208.15	Hnrnpm	4716.04	1.22167	0.146728	-8.32609	8.35566e-17	4.76722e-15	0.582564	0.409235	0.408382	1.55186	1.84083
ENSMUSG00000025508.13	Rplp2	9879.33	1.3789	0.165761	-8.31861	8.89979e-17	5.05676e-15	-2.88176	-2.99985	-2.96556	-1.70936	-1.43595
ENSMUSG00000024413.14	Npc1	1289.81	-1.44805	0.174338	8.30601	9.89773e-17	5.57788e-15	2.13033	1.82538	2.11365	0.630925	0.528282
ENSMUSG00000022858.16	Tra2b	759.686	1.48998	0.179385	-8.30604	9.89504e-17	5.57788e-15	-2.40263	-2.30216	-2.31991	-1.02173	-0.651154
ENSMUSG00000079658.9	Eloc	1181.41	1.11121	0.133792	-8.3055	9.94003e-17	5.57894e-15	-0.249367	-0.353271	-0.221469	0.78039	0.915982
ENSMUSG00000030616.16	Sytl2	400.851	-1.86927	0.225961	8.27256	1.31111e-16	7.32892e-15	0.727005	0.66794	0.93928	-1.19055	-0.968597
ENSMUSG00000051220.2	Ercc6l	517.699	1.94912	0.235803	-8.26586	1.38687e-16	7.7212e-15	1.24383	1.00096	1.39668	2.93562	3.51729
ENSMUSG00000028399.18	Ptprd	1112.81	-1.75135	0.211893	8.26528	1.39363e-16	7.72765e-15	2.51428	1.92087	2.30377	0.397947	0.553062
ENSMUSG00000024989.15	Cep55	431.764	1.77626	0.216352	-8.21004	2.21112e-16	1.22116e-14	1.18854	1.06453	1.47822	2.9077	3.21153
ENSMUSG00000026426.10	Arl8a	2427.9	-0.975039	0.118797	8.20759	2.25672e-16	1.24138e-14	-0.348811	-0.501641	-0.534712	-1.45885	-1.40247
ENSMUSG00000022074.6	Tnfrsf10b	1753.17	-1.14548	0.140199	8.17038	3.07414e-16	1.68431e-14	0.996224	0.796958	0.99889	-0.131953	-0.288151
ENSMUSG00000020952.10	Scfd1	1244.21	2.16834	0.265939	-8.1535	3.53546e-16	1.92941e-14	1.22004	1.0951	1.39082	3.11009	3.90107
ENSMUSG00000031075.19	Ano1	372.217	-1.63533	0.200893	8.14031	3.9428e-16	2.14324e-14	0.809889	0.604944	0.643487	-0.983782	-0.915388
ENSMUSG00000049775.16	Tmsb4x	34483.3	1.2711	0.156212	-8.13702	4.05118e-16	2.19351e-14	0.126431	0.381266	0.0637523	1.52155	1.42456
ENSMUSG00000035107.13	Dcbld2	1659.49	-1.08758	0.133695	8.13479	4.12655e-16	2.2256e-14	0.586242	0.551449	0.649351	-0.477155	-0.492333
ENSMUSG00000037306.13	Man1c1	498.708	-1.52319	0.187305	8.13214	4.21794e-16	2.26604e-14	-0.023637	0.0290753	0.0949651	-1.64144	-1.33534
ENSMUSG00000113061.1	Rps18-ps5	281.197	2.84211	0.350015	-8.11997	4.66291e-16	2.49538e-14	-5.89476	-4.61893	-5.5347	-2.66581	-2.1827
ENSMUSG00000006205.13	Htra1	2491.4	-1.21981	0.150232	8.11948	4.6817e-16	2.49576e-14	1.2098	1.23655	1.04329	-0.0660198	-0.0285077
ENSMUSG00000041645.14	Ddx24	3468.5	0.9245	0.113899	-8.11683	4.78499e-16	2.54102e-14	-0.0748547	-0.0463493	-0.115609	0.813846	0.885846
ENSMUSG00000033031.13	Cip2a	827.574	1.96455	0.242071	-8.11557	4.83493e-16	2.5577e-14	1.99967	1.22062	2.01037	3.52123	3.96492
ENSMUSG00000038510.12	Rpf2	472.824	1.94396	0.239565	-8.11455	4.87588e-16	2.56951e-14	0.248818	-0.015539	0.222606	1.76888	2.56705
ENSMUSG00000022297.15	Fzd6	276.425	-2.19926	0.271259	8.10761	5.16242e-16	2.71017e-14	0.726911	0.274562	1.02332	-1.53933	-1.52389
ENSMUSG00000027810.14	Eif2a	1425.68	1.41026	0.174217	-8.09488	5.73218e-16	2.99789e-14	0.873807	0.791573	1.00596	2.18772	2.46204
ENSMUSG00000037852.8	Cpe	8046.23	-1.39973	0.173261	8.07876	6.54303e-16	3.40899e-14	1.61315	1.60613	1.74122	0.257139	0.260422
ENSMUSG00000024659.15	Anxa1	28734.6	1.37716	0.170476	-8.0783	6.56762e-16	3.40899e-14	0.512913	0.823287	0.793187	1.83469	2.35415
ENSMUSG00000020646.17	Mboat2	575.719	-1.57263	0.19483	8.07179	6.92737e-16	3.58225e-14	0.193543	0.439931	0.637498	-1.08872	-1.19741
ENSMUSG00000028385.14	Snx30	1387.95	-1.32229	0.163915	8.06695	7.20789e-16	3.71341e-14	-0.279684	-0.408292	-0.0592386	-1.55338	-1.58195
ENSMUSG00000019087.13	Atp6ap1	5764.06	-0.939028	0.116518	8.05908	7.68686e-16	3.94545e-14	1.22959	1.29419	1.29854	0.423235	0.259121
ENSMUSG00000028693.15	Nasp	1494.46	1.32227	0.164117	-8.05683	7.82963e-16	4.00384e-14	0.556467	0.320519	0.493424	1.67382	1.90807
ENSMUSG00000021843.17	Ktn1	1793.76	1.53736	0.190828	-8.05627	7.86591e-16	4.00755e-14	1.77955	1.32112	1.79203	3.00235	3.34758
ENSMUSG00000027858.13	Tspan2	559.096	-1.94068	0.241709	8.02901	9.82647e-16	4.98802e-14	-0.504257	-0.207368	-0.146116	-2.46158	-1.98603
ENSMUSG00000028048.11	Gba	1879.44	-0.864161	0.107712	8.02287	1.03303e-15	5.22456e-14	0.958272	0.894142	0.937418	0.0913189	0.0545594
ENSMUSG00000024304.14	Cdh2	3817.71	-1.43313	0.178718	8.01898	1.0663e-15	5.37315e-14	2.1066	2.25007	2.15027	0.819584	0.687897
ENSMUSG00000056492.6	Adgrf5	267.217	-2.29466	0.286327	8.01412	1.10927e-15	5.56935e-14	2.60341	1.65872	2.13383	-0.00597855	-0.342884
ENSMUSG00000064358.1	mt-Co3	499.948	2.41823	0.301846	-8.01148	1.13332e-15	5.64024e-14	-3.07277	-2.01745	-1.93971	0.229755	0.0686494
ENSMUSG00000028347.14	Tmeff1	785.213	-1.39886	0.174612	8.01123	1.13567e-15	5.64024e-14	0.484849	0.215221	0.565266	-1.04327	-0.911093
ENSMUSG00000021929.9	Kpna3	1945.98	1.43345	0.178926	-8.01141	1.13397e-15	5.64024e-14	0.781107	0.65866	1.04067	2.05279	2.52995
ENSMUSG00000024691.13	Fam111a	1154.71	1.82913	0.228333	-8.01079	1.13973e-15	5.64024e-14	1.4801	0.723037	1.19303	2.89758	3.0282
ENSMUSG00000024130.16	Abca3	460.439	-1.71712	0.214811	7.99364	1.31009e-15	6.46015e-14	0.314179	0.328513	0.0466195	-1.39784	-1.51696
ENSMUSG00000031715.14	Smarca5	1100.98	1.62907	0.203847	-7.99165	1.33149e-15	6.5423e-14	-0.691675	-0.918729	-0.691282	0.694533	1.07299
ENSMUSG00000034422.14	Parp14	489.21	5.58161	0.701351	-7.95837	1.74319e-15	8.47472e-14	1.96744	1.16509	1.50579	6.76412	8.03252
ENSMUSG00000037643.14	Prkci	2014.4	-1.07701	0.135329	7.95843	1.7424e-15	8.47472e-14	0.528336	0.522408	0.87642	-0.422978	-0.428577
ENSMUSG00000025477.14	Inpp5a	1481.18	-1.2869	0.161699	7.95859	1.74015e-15	8.47472e-14	-1.32651	-1.71156	-1.47848	-2.86614	-2.71382
ENSMUSG00000060147.15	Serpinb6a	5038.31	1.00243	0.125999	-7.95583	1.77928e-15	8.61985e-14	0.237527	0.39546	0.358318	1.30165	1.37636
ENSMUSG00000033307.7	Mif	4181.72	1.04882	0.132177	-7.93496	2.10568e-15	1.01654e-13	-3.48476	-3.46411	-3.45192	-2.31801	-2.51137
ENSMUSG00000020982.9	Nemf	908.325	1.43081	0.180344	-7.93381	2.12523e-15	1.02241e-13	1.25136	0.735581	1.21965	2.48385	2.51804
ENSMUSG00000045328.11	Cenpe	1304.85	1.95376	0.246599	-7.92281	2.32195e-15	1.11316e-13	1.89628	1.12032	1.76603	3.37457	3.70625
ENSMUSG00000028907.7	Utp11	971.927	1.1426	0.144528	-7.90571	2.66403e-15	1.27274e-13	0.444546	0.25335	0.192204	1.45484	1.42732
ENSMUSG00000040151.9	Hs2st1	1737.6	-1.03149	0.130708	7.89151	2.98557e-15	1.42144e-13	0.118209	-0.153564	0.200439	-1.02583	-0.912985
ENSMUSG00000025810.9	Nrp1	5005.07	-1.17604	0.149176	7.88362	3.18025e-15	1.50893e-13	2.36835	2.18606	2.56858	1.16777	1.23554
ENSMUSG00000017466.9	Timp2	14259.1	-0.88394	0.112273	7.87312	3.45917e-15	1.63564e-13	-0.23634	-0.132434	-0.132952	-0.978857	-1.10652
ENSMUSG00000020411.2	Nipal4	279.213	-1.63344	0.207527	7.87099	3.51852e-15	1.65803e-13	-0.29949	-0.154847	-0.0454547	-1.6819	-1.90263
ENSMUSG00000025579.14	Gaa	3568.91	-1.05536	0.134114	7.8691	3.57215e-15	1.67757e-13	1.26944	1.35608	1.17248	0.263829	0.179163
ENSMUSG00000026580.16	Selp	123.037	-3.86672	0.491703	7.86394	3.72249e-15	1.74225e-13	1.15968	2.30716	1.72425	-1.48073	-2.63973
ENSMUSG00000023043.7	Krt18	841.472	-1.77374	0.226311	7.83763	4.59138e-15	2.14166e-13	-0.318638	-0.248414	-0.342608	-2.19536	-1.92131
ENSMUSG00000028419.5	Chmp5	1430.89	1.06824	0.1364	-7.83164	4.81532e-15	2.23856e-13	0.292345	0.362489	0.252918	1.29016	1.46421
ENSMUSG00000033295.14	Ptprf	2138.54	-1.06301	0.135812	7.82706	4.99416e-15	2.31391e-13	0.307748	0.455627	0.291157	-0.623372	-0.776358
ENSMUSG00000021520.4	Uqcrb	509.425	1.60658	0.205383	-7.82235	5.18455e-15	2.39408e-13	-2.33441	-2.0965	-2.53071	-0.700326	-0.720895
ENSMUSG00000033039.10	Micall1	1001.59	-1.2428	0.159398	7.79686	6.34685e-15	2.92103e-13	-0.269521	-0.286419	-0.312921	-1.5638	-1.4832
ENSMUSG00000030707.15	Coro1a	252.422	2.05516	0.263908	-7.78742	6.83901e-15	3.13709e-13	-0.367993	0.0876653	-0.269446	1.80175	1.94575
ENSMUSG00000025278.9	Flnb	39803.7	-1.45368	0.186754	7.78392	7.03125e-15	3.21459e-13	0.643314	0.580501	0.455328	-0.981604	-0.797379
ENSMUSG00000027859.10	Ngf	1699.32	-1.02447	0.131641	7.78232	7.12091e-15	3.24483e-13	0.215818	0.318962	0.385902	-0.798375	-0.625057
ENSMUSG00000032372.14	Plscr2	196.724	2.33433	0.300098	-7.77855	7.33624e-15	3.33196e-13	0.610726	0.781973	1.25204	3.23013	3.2236
ENSMUSG00000022216.17	Psme1	787.251	1.36639	0.175736	-7.77525	7.5297e-15	3.40861e-13	-0.598835	-0.804623	-0.866353	0.684275	0.535067
ENSMUSG00000027108.15	Ola1	1981.02	1.01586	0.130663	-7.77468	7.56363e-15	3.41278e-13	0.785607	0.560346	0.80694	1.71905	1.76834
ENSMUSG00000031274.16	Col4a5	2149.22	-1.5544	0.200205	7.76407	8.22483e-15	3.69903e-13	1.58484	1.71967	1.68885	0.224739	0.0303391
ENSMUSG00000022822.16	Abcc5	863.19	-1.30076	0.167751	7.75409	8.89776e-15	3.98868e-13	0.852371	1.08424	1.06556	-0.22207	-0.347646
ENSMUSG00000039844.20	Rapgef1	3093.9	-0.950068	0.122566	7.75149	9.08224e-15	4.0582e-13	-2.46012	-2.33246	-2.34316	-3.33	-3.30854
ENSMUSG00000064181.6	Rab3ip	1314.43	-1.21289	0.156675	7.74147	9.82765e-15	4.37711e-13	-0.854644	-0.492675	-0.429658	-1.77124	-1.82251
ENSMUSG00000053626.5	Tll1	2688.11	-1.73775	0.224506	7.74033	9.91613e-15	4.40231e-13	1.79185	1.47939	1.85663	-0.253239	0.14639
ENSMUSG00000028367.5	Txn1	5391.12	1.10743	0.143229	-7.73188	1.05967e-14	4.6894e-13	-0.0470386	0.0738519	0.132128	1.32555	0.997116
ENSMUSG00000021253.7	Tgfb3	4953.75	-0.951654	0.123154	7.72736	1.09804e-14	4.84364e-13	-0.487114	-0.357601	-0.362884	-1.35425	-1.33934
ENSMUSG00000017493.12	Igfbp4	1944.56	1.44251	0.186809	-7.72185	1.1465e-14	5.04131e-13	-0.722321	-0.818917	-0.946334	0.549126	0.695287
ENSMUSG00000062960.10	Kdr	555.643	-2.02102	0.262369	7.70299	1.32921e-14	5.82617e-13	1.72487	1.47332	1.64454	-0.462936	-0.346374
ENSMUSG00000039835.16	Nhsl1	425.265	-1.70605	0.221497	7.70234	1.33595e-14	5.83715e-13	1.18521	0.860715	1.08649	-0.722538	-0.623363
ENSMUSG00000024074.8	Crim1	5649.02	-1.63578	0.212413	7.70093	1.35077e-14	5.8833e-13	2.03525	1.97386	2.09044	0.326803	0.475944
ENSMUSG00000025980.14	Hspd1	6578.89	0.863496	0.112218	-7.69479	1.41723e-14	6.15336e-13	-1.66814	-1.78288	-1.6784	-0.833965	-0.846872
ENSMUSG00000027397.14	Slc20a1	2907.03	-0.955691	0.124221	7.69348	1.43189e-14	6.19753e-13	0.154553	0.151588	0.266064	-0.722938	-0.792146
ENSMUSG00000034908.16	Sidt2	3090.11	-0.882419	0.114711	7.69257	1.4421e-14	6.2222e-13	-1.60765	-1.64915	-1.7217	-2.58815	-2.48129
ENSMUSG00000021290.6	Atp5mpl	1129.69	1.03324	0.134524	-7.68074	1.5817e-14	6.80328e-13	0.320261	0.370924	0.351847	1.45012	1.32031
ENSMUSG00000020154.10	Ptprb	180.578	-2.38044	0.310824	7.65847	1.88161e-14	8.06814e-13	1.10774	0.966161	0.981223	-1.4482	-1.3201
ENSMUSG00000021243.14	Fcf1	472.657	1.59249	0.208033	-7.65498	1.93349e-14	8.26491e-13	-0.580656	-0.801386	-0.618162	1.03618	0.81325
ENSMUSG00000032232.14	Cgnl1	1155.9	-1.44799	0.189343	7.64746	2.04986e-14	8.73533e-13	-0.498542	-0.370851	-0.456549	-1.85733	-1.88907
ENSMUSG00000026193.15	Fn1	169950	-1.85403	0.242775	7.63682	2.22653e-14	9.459e-13	2.89682	2.14303	2.25451	0.580062	0.515048
ENSMUSG00000036026.15	Tmem63b	1386.11	-1.18681	0.155424	7.63594	2.24181e-14	9.4947e-13	-0.165028	-0.0100208	-0.175248	-1.22878	-1.34647
ENSMUSG00000027966.20	Col11a1	4889.4	-1.7749	0.232525	7.63314	2.29101e-14	9.6734e-13	2.42406	1.86981	1.9925	0.259683	0.352403
ENSMUSG00000064354.1	mt-Co2	537.738	2.17881	0.285627	-7.62815	2.38141e-14	1.00244e-12	-2.60412	-1.89592	-1.94329	-0.0154701	0.155732
ENSMUSG00000027326.13	Knl1	497.079	2.11876	0.277866	-7.6251	2.43851e-14	1.02336e-12	2.59996	1.90084	2.79104	4.39878	4.7757
ENSMUSG00000036768.6	Kif15	347.373	2.08006	0.273264	-7.6119	2.70092e-14	1.13005e-12	1.43671	1.00982	1.48701	3.27269	3.54689
ENSMUSG00000058558.12	Rpl5	6973.49	1.53844	0.202419	-7.6003	2.95453e-14	1.22886e-12	-6.71894	-6.52209	-6.33032	-4.73706	-5.21269
ENSMUSG00000031099.16	Smarca1	163.395	2.71113	0.356714	-7.60028	2.95489e-14	1.22886e-12	1.81785	1.64279	1.50918	4.29288	4.33745
ENSMUSG00000023830.14	Igf2r	14726.8	-1.67895	0.22097	7.59806	3.00605e-14	1.24638e-12	3.06018	2.33284	2.54402	0.972864	0.912795
ENSMUSG00000027620.16	Rbm39	1774.66	1.32952	0.175217	-7.58786	3.25229e-14	1.34444e-12	1.18415	0.631484	1.11854	2.26508	2.35873
ENSMUSG00000036198.12	Arhgap36	115.655	-3.85697	0.509318	7.57281	3.65226e-14	1.50527e-12	0.0128429	1.25449	0.965075	-2.25026	-4.14909
ENSMUSG00000023919.7	Cenpq	150.265	2.48728	0.328636	-7.56849	3.77594e-14	1.55162e-12	0.824878	0.277587	0.889887	3.28836	3.00612
ENSMUSG00000032407.14	U2surp	1356.85	1.37116	0.181178	-7.56802	3.78969e-14	1.55265e-12	0.978065	0.516984	1.03935	2.08197	2.38584
ENSMUSG00000041459.15	Tardbp	3301.58	0.948131	0.125295	-7.5672	3.81353e-14	1.55779e-12	0.205309	0.0710329	0.272237	1.02741	1.25977
ENSMUSG00000066258.13	Trim12a	54.423	3.54341	0.468332	-7.56602	3.8482e-14	1.56732e-12	-0.993148	-1.50779	-1.16184	3.02884	1.62115
ENSMUSG00000002900.16	Lamb1	15708.2	-1.28423	0.169855	7.56075	4.00751e-14	1.6274e-12	2.28848	1.95703	2.12379	0.826022	0.846186
ENSMUSG00000020950.10	Foxg1	80.5328	-3.75791	0.497132	7.55917	4.05643e-14	1.64244e-12	-0.719323	-0.269583	-0.532222	-5.4374	-3.56541
ENSMUSG00000042396.10	Rbm7	593.932	1.33288	0.176398	-7.55611	4.1531e-14	1.67666e-12	-0.258743	-0.366038	-0.0887883	0.937886	1.29548
ENSMUSG00000090272.9	Mndal	46.1145	8.48833	1.12377	-7.55344	4.23898e-14	1.70635e-12	-0.352868	-2.30319	#NAME?	5.98763	9.06207
ENSMUSG00000004730.15	Adgre1	375.295	2.64641	0.350568	-7.54892	4.38872e-14	1.76149e-12	1.29953	0.676589	1.2739	3.68202	3.82871
ENSMUSG00000026034.17	Clk1	373.998	1.58095	0.209461	-7.54772	4.4295e-14	1.7727e-12	1.28369	1.08346	1.11011	2.53389	3.02094
ENSMUSG00000063200.4	Nol7	613.066	1.28528	0.170374	-7.54386	4.56262e-14	1.8207e-12	0.0635905	-0.0588559	0.314492	1.42723	1.37518
ENSMUSG00000054072.12	Iigp1	178.702	7.21497	0.95698	-7.53931	4.7245e-14	1.87986e-12	2.37235	1.44526	1.0715	8.22153	10.7625
ENSMUSG00000045128.9	Rpl18a	10478.3	1.39149	0.184577	-7.53883	4.74222e-14	1.88149e-12	-7.11815	-6.68863	-7.31228	-5.61522	-5.64642
ENSMUSG00000026980.15	Ly75	777.541	-1.38175	0.183382	7.53481	4.89048e-14	1.93475e-12	2.59114	2.43966	2.50309	1.01677	1.23226
ENSMUSG00000068246.6	Apol9b	33.9806	5.63257	0.748458	-7.52557	5.24918e-14	2.07073e-12	-2.29221	-3.33992	-4.49862	2.91724	1.90496
ENSMUSG00000041431.16	Ccnb1	672.466	1.28792	0.171274	-7.51965	5.49225e-14	2.16044e-12	-2.64961	-2.97074	-2.80246	-1.58619	-1.43411
ENSMUSG00000028179.12	Cth	306.418	1.71736	0.228594	-7.5127	5.79207e-14	2.2719e-12	0.798505	0.868256	0.92294	2.76257	2.37729
ENSMUSG00000031503.13	Col4a2	22863.2	-1.61602	0.21527	7.50696	6.05148e-14	2.36693e-12	1.17917	0.917295	0.714459	-0.732073	-0.623745
ENSMUSG00000020180.10	Snrpd3	2204.23	1.1562	0.154074	-7.50416	6.1822e-14	2.41123e-12	0.883218	0.879531	0.734218	2.03601	1.94073
ENSMUSG00000020097.14	Sgpl1	3173.37	-0.877654	0.116962	7.50377	6.201e-14	2.41175e-12	0.620424	0.607206	0.668416	-0.282903	-0.188781
ENSMUSG00000057278.8	Snrpg	452.625	2.9864	0.398474	-7.49459	6.65035e-14	2.57925e-12	-6.58702	-6.8883	-6.68195	-3.97791	-3.51759
ENSMUSG00000030016.14	Zfp638	1192	1.74292	0.232609	-7.49292	6.73593e-14	2.60375e-12	2.42461	1.71121	2.26496	3.64646	4.16866
ENSMUSG00000028037.13	Ifi44	460.953	6.88394	0.918763	-7.49262	6.75122e-14	2.60375e-12	3.5717	2.03022	2.21497	9.13398	9.20509
ENSMUSG00000040483.15	Xaf1	296.831	5.63533	0.752916	-7.48467	7.17281e-14	2.75863e-12	0.854949	-0.621355	0.637353	5.93815	5.99959
ENSMUSG00000041841.8	Rpl37	3896.12	1.12055	0.150286	-7.45612	8.91051e-14	3.41743e-12	-2.39991	-2.33219	-2.58079	-1.17119	-1.44417
ENSMUSG00000031799.10	Tpm4	13111.4	0.767965	0.103052	-7.45219	9.18006e-14	3.51105e-12	-1.72085	-1.89444	-1.85035	-1.07882	-1.01602
ENSMUSG00000001507.16	Itga3	1280.88	-1.63446	0.219417	7.4491	9.39779e-14	3.5844e-12	0.561513	0.984583	0.756042	-0.81322	-0.873853
ENSMUSG00000015568.16	Lpl	429.924	1.47721	0.198441	-7.4441	9.76061e-14	3.71253e-12	1.86823	1.55694	1.50757	3.0992	3.0976
ENSMUSG00000021597.16	Slf1	330.914	1.90568	0.256067	-7.44209	9.91038e-14	3.75914e-12	1.61093	1.53414	1.93104	3.35024	3.92025
ENSMUSG00000034560.6	Washc4	1297.37	1.60891	0.21637	-7.4359	1.0386e-13	3.92874e-12	1.97777	1.59606	2.04885	3.20634	3.87562
ENSMUSG00000033542.13	Arhgef5	1298.38	-1.54387	0.207723	7.43237	1.06672e-13	4.02409e-12	-0.338578	0.0444862	-0.196089	-1.83861	-1.54465
ENSMUSG00000039116.7	Adgrg6	554.874	-1.83933	0.247492	7.43187	1.07076e-13	4.02832e-12	1.87844	1.14588	1.58811	-0.301345	-0.355562
ENSMUSG00000024486.6	Hbegf	3652.3	-1.3207	0.177718	7.43147	1.07399e-13	4.02949e-12	-0.263863	-0.0779111	-0.0979503	-1.65514	-1.27915
ENSMUSG00000068699.12	Flnc	22015.6	-1.41662	0.19077	7.42577	1.12129e-13	4.19351e-12	1.01637	1.15699	0.931202	-0.45881	-0.272142
ENSMUSG00000020122.16	Egfr	3035.73	-1.41791	0.190953	7.42547	1.12378e-13	4.19351e-12	2.25622	1.8387	2.19342	0.667622	0.676686
ENSMUSG00000022789.15	Dnm1l	1405.02	1.16236	0.156568	-7.42401	1.13629e-13	4.22876e-12	1.01066	0.715786	1.12385	1.9792	2.27475
ENSMUSG00000032409.15	Atr	451.69	1.97775	0.26665	-7.41702	1.19781e-13	4.44575e-12	2.09942	1.45236	2.09751	3.7414	4.0339
ENSMUSG00000020677.7	Ddx52	761.852	1.32932	0.179428	-7.40868	1.27559e-13	4.72173e-12	0.34397	0.250314	0.792976	1.70514	1.91126
ENSMUSG00000028005.13	Gucy1b1	346.905	-1.61311	0.217901	7.40293	1.33216e-13	4.91796e-12	0.773001	1.10767	1.09074	-0.891801	-0.314123
ENSMUSG00000022575.5	Gsdmd	185.444	2.72937	0.36876	-7.40149	1.34668e-13	4.9583e-12	-0.415256	-0.173736	0.081755	2.94429	2.18128
ENSMUSG00000005417.17	Mprip	8473.29	-0.786024	0.106232	7.39912	1.37087e-13	5.03393e-12	-2.29428	-2.15079	-2.1948	-2.98158	-3.00201
ENSMUSG00000033174.17	Mgll	1051.23	-1.12823	0.152674	7.38981	1.47035e-13	5.3849e-12	-1.1728	-1.03749	-1.20994	-2.38415	-2.15126
ENSMUSG00000021665.9	Hexb	1138.95	-1.06075	0.143561	7.38885	1.481e-13	5.40959e-12	2.05937	1.91009	2.2611	1.04752	1.01177
ENSMUSG00000021392.8	Nol8	521.442	1.50767	0.204058	-7.38845	1.48552e-13	5.41176e-12	1.43783	1.26402	1.45884	2.567	3.31417
ENSMUSG00000027770.5	Dhx36	1501.83	1.60699	0.217823	-7.37748	1.61314e-13	5.8612e-12	1.37872	1.33968	1.68257	2.80884	3.45949
ENSMUSG00000031972.5	Acta1	2323.96	-1.85535	0.251795	7.36847	1.72594e-13	6.25462e-12	-0.232751	0.287545	-0.0272668	-2.17207	-1.54737
ENSMUSG00000042473.8	Tbc1d8b	880.03	1.54945	0.210498	-7.36088	1.82705e-13	6.60368e-12	2.36796	1.89365	2.43909	3.6172	3.99409
ENSMUSG00000020608.7	Smc6	1174.92	1.37484	0.186793	-7.36024	1.83586e-13	6.6182e-12	1.13933	0.70988	1.27872	2.303	2.57538
ENSMUSG00000029561.17	Oasl2	641.677	6.24549	0.848645	-7.35938	1.84771e-13	6.64356e-12	1.16194	0.100453	0.893695	6.6854	7.54439
ENSMUSG00000014444.17	Piezo1	7544.61	-1.15037	0.156378	7.35633	1.89042e-13	6.77949e-12	0.245778	0.0498223	0.0113116	-1.04717	-1.04008
ENSMUSG00000002983.17	Relb	339.975	1.58325	0.215282	-7.35432	1.91906e-13	6.86436e-12	-0.821137	-0.674687	-0.707786	1.03304	0.670047
ENSMUSG00000036599.10	Chst12	1872.95	-1.22297	0.166384	7.35032	1.97733e-13	7.0545e-12	-0.029115	0.350192	-0.0420935	-1.1489	-1.0795
ENSMUSG00000031357.3	Syap1	648.986	1.49052	0.202857	-7.34765	2.01728e-13	7.17851e-12	0.429173	0.448254	0.852022	1.79898	2.36823
ENSMUSG00000015757.10	Ppil4	319.45	1.6099	0.219274	-7.34199	2.1044e-13	7.46928e-12	0.781283	0.472048	1.00338	2.20182	2.56124
ENSMUSG00000024335.20	Brd2	3926.37	-0.86641	0.11805	7.33934	2.1465e-13	7.59916e-12	-0.194589	-0.26308	-0.255212	-1.14217	-1.05235
ENSMUSG00000020120.15	Plek	70.9381	3.24115	0.441987	-7.33314	2.24826e-13	7.93905e-12	0.276781	-0.683449	-0.223125	3.14755	2.82696
ENSMUSG00000000563.17	Atp5pb	2931.33	0.969181	0.132198	-7.3313	2.27932e-13	8.02819e-12	-1.25264	-1.0516	-0.997915	-0.170227	-0.0835922
ENSMUSG00000032212.10	Sltm	838.461	1.38864	0.189453	-7.32971	2.30658e-13	8.09218e-12	0.937785	0.388181	0.601403	1.89038	2.16804
ENSMUSG00000032340.8	Neo1	2420.13	-1.15575	0.157684	7.32955	2.3092e-13	8.09218e-12	1.41378	1.14886	1.31732	0.253119	0.0235635
ENSMUSG00000053453.9	Thoc7	679.511	1.2196	0.166636	-7.31894	2.49943e-13	8.7366e-12	1.2183	1.12481	1.42826	2.39014	2.57872
ENSMUSG00000055912.8	Tmem150a	497.825	-1.26125	0.172496	7.31174	2.63703e-13	9.19431e-12	-0.37301	-0.537349	-0.528607	-1.86849	-1.62081
ENSMUSG00000070327.14	Rnf213	6415.29	3.23573	0.443741	-7.29194	3.05531e-13	1.06259e-11	2.91517	1.45454	2.1578	5.3774	5.30669
ENSMUSG00000027309.18	4930402H24Rik	2738.15	-1.18983	0.163197	7.29075	3.08233e-13	1.06929e-11	0.315635	0.447923	0.370785	-0.891961	-0.705416
ENSMUSG00000005362.14	Crbn	430.85	1.54278	0.211669	-7.28863	3.13112e-13	1.08267e-11	0.659666	0.437096	0.815805	2.04026	2.38817
ENSMUSG00000024066.9	Xdh	48.3104	4.53979	0.622879	-7.2884	3.13658e-13	1.08267e-11	0.227084	0.15952	-0.823531	4.61621	4.15616
ENSMUSG00000023089.12	Ndufa5	691.124	1.39913	0.191996	-7.28728	3.1627e-13	1.08896e-11	0.642258	0.714347	0.764578	2.25218	1.9593
ENSMUSG00000017756.9	Slc12a7	1271.19	-1.10578	0.151974	7.27609	3.43642e-13	1.18027e-11	0.984806	0.935818	0.781403	-0.217234	-0.175592
ENSMUSG00000029328.15	Hnrnpdl	1174.53	1.01762	0.140046	-7.26629	3.69498e-13	1.26592e-11	-0.73622	-0.797137	-0.466532	0.380234	0.342639
ENSMUSG00000005357.9	Slc1a6	986.583	-1.55219	0.213732	7.26232	3.80506e-13	1.30041e-11	0.191452	0.878276	0.589469	-0.981435	-0.98633
ENSMUSG00000031347.12	Cetn2	261.286	1.6566	0.228424	-7.2523	4.0976e-13	1.39693e-11	0.067734	0.0270332	0.215668	1.46456	2.13823
ENSMUSG00000021009.15	Ptpn21	913.818	-1.16995	0.161392	7.24915	4.19385e-13	1.42622e-11	0.511232	0.395018	0.236531	-0.727599	-0.830635
ENSMUSG00000029019.8	Nppb	245.173	-2.39327	0.330449	7.24248	4.40541e-13	1.49448e-11	-0.426774	0.469151	0.0206486	-2.88169	-1.96493
ENSMUSG00000037300.19	Ttc13	1312.74	-0.899034	0.124149	7.24159	4.43459e-13	1.50069e-11	0.879316	0.929548	1.04328	0.144253	-0.0204324
ENSMUSG00000049107.13	Ntf3	145.046	-2.31036	0.319095	7.24036	4.47492e-13	1.51064e-11	0.213012	0.843966	0.765186	-1.37043	-2.03257
ENSMUSG00000030291.12	Med21	744.802	1.28527	0.17795	-7.2226	5.10027e-13	1.71755e-11	0.948053	1.14522	1.29402	2.6063	2.24171
ENSMUSG00000011256.16	Adam19	3294.99	-1.53679	0.212853	7.21995	5.20051e-13	1.74704e-11	0.274148	-0.121921	-0.0719859	-1.50796	-1.52264
ENSMUSG00000068335.6	Dok1	2039.34	0.899982	0.1247	-7.21719	5.30713e-13	1.77853e-11	-0.361415	-0.304523	-0.395848	0.445502	0.658214
ENSMUSG00000031438.11	Rnf128	797	-1.83193	0.253863	7.21622	5.34506e-13	1.78691e-11	1.63623	1.75299	1.95559	-0.0939805	-0.00526626
ENSMUSG00000025746.11	Il6	113.234	2.96127	0.410689	-7.21049	5.57492e-13	1.85925e-11	1.34374	1.68571	1.5408	4.75379	4.10773
ENSMUSG00000074582.10	Arfgef2	1321.25	-1.04391	0.144805	7.20913	5.63123e-13	1.86729e-11	0.585301	0.502702	0.625587	-0.504753	-0.42577
ENSMUSG00000009927.9	Rps25	6989.2	1.46179	0.202775	-7.20892	5.6396e-13	1.86729e-11	-3.93137	-3.97153	-4.20301	-2.78513	-2.39064
ENSMUSG00000091625.8	Lsm5	162.602	2.0537	0.284859	-7.20954	5.61425e-13	1.86729e-11	-2.07817	-2.25044	-2.54202	-0.33744	-0.165179
ENSMUSG00000007739.10	Cct4	9774.36	0.971756	0.13503	-7.19662	6.17249e-13	2.03884e-11	0.599747	0.678227	0.956781	1.71625	1.7241
ENSMUSG00000022800.14	Fyttd1	1412.04	1.22941	0.170977	-7.19048	6.45633e-13	2.12751e-11	0.608909	0.480024	0.972442	1.85519	2.01318
ENSMUSG00000020330.16	Hmmr	1122.33	1.56558	0.218143	-7.17688	7.13214e-13	2.34461e-11	1.24504	0.679483	1.30752	2.56045	2.76561
ENSMUSG00000027514.14	Zbp1	70.2339	6.81122	0.949103	-7.17647	7.15318e-13	2.34594e-11	-0.750232	0.401051	-0.590895	6.32383	6.73279
ENSMUSG00000032661.9	Oas3	71.2674	5.50904	0.768227	-7.17111	7.43927e-13	2.42867e-11	-0.0542151	-1.20855	1.0715	5.45526	5.76812
ENSMUSG00000021281.15	Tnfaip2	977.694	1.13091	0.157704	-7.17108	7.44062e-13	2.42867e-11	-0.385076	-0.597724	-0.65804	0.664834	0.518644
ENSMUSG00000005410.6	Mcm5	2686.1	1.05895	0.147936	-7.15818	8.17572e-13	2.66231e-11	-0.208977	-0.396133	-0.358784	0.735427	0.746565
ENSMUSG00000012519.14	Mlkl	191.958	2.08572	0.292038	-7.14194	9.20226e-13	2.98954e-11	0.913127	-0.204635	0.344171	2.42252	2.44717
ENSMUSG00000011752.7	Pgam1	3710.59	1.68238	0.235705	-7.13768	9.49214e-13	3.07648e-11	-6.54505	-6.03349	-6.15672	-4.85299	-4.30323
ENSMUSG00000016427.7	Ndufa1	656.83	1.254	0.175711	-7.13675	9.5562e-13	3.08999e-11	0.578315	0.93714	0.613279	2.09156	1.84121
ENSMUSG00000028370.7	Pappa	1827.75	-1.44033	0.201853	7.13554	9.64089e-13	3.11009e-11	1.77615	1.63859	1.72539	0.112793	0.44303
ENSMUSG00000029998.14	Pcyox1	1721.01	-1.1405	0.160056	7.12565	1.03593e-12	3.33405e-11	1.1405	1.11028	1.13405	0.19363	-0.209833
ENSMUSG00000027208.14	Fgf7	397.59	1.76241	0.247386	-7.12415	1.04728e-12	3.36273e-11	0.19055	-0.360839	0.277695	1.61242	2.04732
ENSMUSG00000025630.8	Hprt	2105.44	0.96439	0.135433	-7.12077	1.07328e-12	3.43823e-11	0.532333	0.484574	0.707548	1.51444	1.58504
ENSMUSG00000034855.13	Cxcl10	976.999	5.54626	0.779789	-7.11251	1.1395e-12	3.64191e-11	1.40136	-0.870685	1.23878	6.5836	5.8876
ENSMUSG00000020116.7	Pno1	1521.27	1.09056	0.153416	-7.10852	1.17295e-12	3.74017e-11	0.228191	0.325812	0.578527	1.67766	1.27585
ENSMUSG00000025006.18	Sorbs1	1945.03	-0.973967	0.137163	7.10079	1.24045e-12	3.94629e-11	1.20476	1.09308	1.207	0.146762	0.251225
ENSMUSG00000038963.15	Slco4a1	207.606	1.96659	0.277076	-7.09766	1.2689e-12	4.02753e-11	0.639475	0.425108	1.21347	2.78372	2.73819
ENSMUSG00000029467.15	Atp2a2	8439.05	-1.06875	0.150726	7.09071	1.33427e-12	4.2253e-11	1.5122	1.21084	1.48379	0.388874	0.276491
ENSMUSG00000032625.14	Thsd7a	426.723	-1.97371	0.278634	7.08351	1.40548e-12	4.44062e-11	1.41061	1.80983	1.65	-0.495705	-0.116048
ENSMUSG00000028444.17	Cntfr	300.381	-1.55772	0.219975	7.08136	1.4275e-12	4.49988e-11	0.438776	-0.181894	-0.0785347	-1.48649	-1.50462
ENSMUSG00000047534.17	Mis18bp1	213.775	2.19143	0.309489	-7.08079	1.43331e-12	4.50792e-11	1.93114	1.20416	1.93595	3.64827	4.1572
ENSMUSG00000022035.6	Ccdc25	338.793	1.36399	0.192779	-7.07538	1.49038e-12	4.67676e-11	0.422859	0.0909797	0.278199	1.70033	1.55281
ENSMUSG00000041238.16	Rbbp8	259.675	1.76379	0.249526	-7.06855	1.56562e-12	4.9017e-11	0.625415	0.193179	0.587083	2.06764	2.43606
ENSMUSG00000019851.8	Perp	938.534	-2.15701	0.3053	7.0652	1.60387e-12	5.0101e-11	0.253516	1.21429	0.81775	-1.42358	-1.34983
ENSMUSG00000025232.8	Hexa	3231.12	-0.86301	0.122156	7.06484	1.60807e-12	5.01187e-11	0.285903	0.361971	0.176361	-0.553206	-0.608308
ENSMUSG00000061436.15	Hipk2	985.537	-1.63778	0.23191	7.06211	1.63996e-12	5.09976e-11	0.2043	-0.460397	-0.188779	-1.91359	-1.68653
ENSMUSG00000020846.6	Rflnb	1300.9	-1.42834	0.202385	7.05753	1.69492e-12	5.24705e-11	-1.3993	-1.65599	-1.26104	-3.02703	-2.73527
ENSMUSG00000039275.9	Foxk2	1836.87	-0.894476	0.126738	7.05766	1.69327e-12	5.24705e-11	-0.909475	-1.13477	-1.07053	-2.00758	-1.84859
ENSMUSG00000039405.7	Prss23	12211.8	-0.879385	0.124685	7.05283	1.75311e-12	5.41504e-11	2.22462	2.35092	2.41044	1.51619	1.40114
ENSMUSG00000061666.6	Gdpd1	208.305	-1.60038	0.227064	7.04815	1.81318e-12	5.58809e-11	0.813477	0.762998	0.87594	-0.589894	-0.937787
ENSMUSG00000022892.11	App	15402.6	-1.10902	0.157497	7.0415	1.90175e-12	5.84797e-11	1.88538	1.59032	1.70776	0.679586	0.561175
ENSMUSG00000022010.19	Tsc22d1	7519.29	-1.15457	0.163987	7.04062	1.91389e-12	5.87224e-11	-0.37243	0.017947	-0.248832	-1.39785	-1.30063
ENSMUSG00000031586.17	Rbpms	927.061	-0.982101	0.139549	7.0377	1.95444e-12	5.98335e-11	0.252769	0.248878	0.254873	-0.776092	-0.660117
ENSMUSG00000045427.13	Hnrnph2	827.409	1.18714	0.168834	-7.03144	2.04411e-12	6.24403e-11	-0.228418	-0.566087	-0.433877	0.639134	0.921245
ENSMUSG00000030352.15	Tspan9	2059.79	-0.928917	0.132168	7.02833	2.0902e-12	6.37074e-11	-0.900897	-0.738397	-0.776636	-1.77409	-1.67465
ENSMUSG00000019997.11	Ccn2	50503.6	-1.09179	0.155383	7.02644	2.11863e-12	6.44317e-11	1.47707	1.53621	1.68866	0.445767	0.511122
ENSMUSG00000025395.14	Prim1	405.249	1.31165	0.18671	-7.02511	2.13901e-12	6.49084e-11	0.679813	0.51194	0.625134	1.95399	1.88162
ENSMUSG00000027823.9	Gmps	2185.13	1.24355	0.177023	-7.02478	2.144e-12	6.49171e-11	0.746485	0.609591	0.876581	1.77888	2.25405
ENSMUSG00000032368.14	Zic1	351.092	-1.57163	0.223748	7.02411	2.15436e-12	6.5088e-11	0.3726	0.941598	0.899879	-0.800314	-0.832548
ENSMUSG00000032254.10	Kif23	953.525	1.12951	0.160818	-7.02351	2.16361e-12	6.52247e-11	0.911552	0.435256	0.688464	1.71881	1.89857
ENSMUSG00000025240.10	Sacm1l	1084.59	1.21522	0.173059	-7.02201	2.18694e-12	6.56335e-11	2.23431	1.98826	2.44394	3.35139	3.57106
ENSMUSG00000021806.4	Nid2	4523.31	-1.21403	0.172889	7.02202	2.18681e-12	6.56335e-11	2.46025	2.05644	2.19258	1.11043	0.926003
ENSMUSG00000020460.15	Rps27a	5899.2	1.43883	0.204911	-7.02173	2.19143e-12	6.56335e-11	-7.60879	-7.39469	-7.26932	-5.89834	-6.06052
ENSMUSG00000011877.13	Git1	1668.93	-0.913631	0.13026	7.01388	2.31802e-12	6.92746e-11	-1.58181	-1.4582	-1.56153	-2.45279	-2.4299
ENSMUSG00000057193.8	Slc44a2	2115.11	-0.996872	0.142171	7.01179	2.35289e-12	7.01648e-11	0.561679	0.358754	0.29254	-0.540713	-0.639515
ENSMUSG00000033207.7	Mamdc2	323.362	-1.47955	0.211355	7.00032	2.55376e-12	7.5991e-11	1.78159	1.50982	1.70751	-0.0680764	0.422121
ENSMUSG00000031751.14	Amfr	3329.93	-0.888566	0.126985	6.99743	2.60703e-12	7.74092e-11	-0.121667	0.0910133	0.108097	-0.874084	-0.838927
ENSMUSG00000020121.15	Srgap1	371.977	-1.79437	0.256502	6.99554	2.64237e-12	7.829e-11	0.827512	0.306036	0.379073	-1.41371	-1.21878
ENSMUSG00000047757.17	Fancb	161.377	2.56368	0.367305	-6.9797	2.95802e-12	8.74548e-11	1.58749	1.33307	1.91644	4.29744	4.01646
ENSMUSG00000031422.16	Morf4l2	4711.16	0.875928	0.125646	-6.97138	3.13839e-12	9.25891e-11	-1.17243	-1.02362	-1.19765	-0.271365	-0.224673
ENSMUSG00000022300.10	Dcaf13	1290.63	1.09722	0.157415	-6.9702	3.16492e-12	9.31727e-11	0.723523	0.543436	0.82622	1.70529	1.91592
ENSMUSG00000023224.12	Serping1	309.117	1.98188	0.284364	-6.96952	3.18017e-12	9.34225e-11	1.54201	1.25554	1.25084	3.30015	3.31675
ENSMUSG00000078302.5	Foxd1	136.138	-2.54667	0.365468	6.96825	3.20915e-12	9.40736e-11	-0.18973	0.0777163	0.0352813	-2.99244	-2.25986
ENSMUSG00000039997.16	Ifi203	65.4682	7.40963	1.06463	-6.95985	3.40647e-12	9.96465e-11	#NAME?	0.316503	0.702615	6.93749	7.70916
ENSMUSG00000045039.9	Megf8	1058.23	-1.11824	0.160699	6.9586	3.43664e-12	1.00317e-10	-1.02384	-0.822055	-1.00544	-2.0422	-2.06457
ENSMUSG00000021760.5	Gpx8	2844.47	0.831573	0.119553	-6.95568	3.50869e-12	1.02204e-10	0.797451	0.776758	0.890855	1.75991	1.55695
ENSMUSG00000025931.15	Paqr8	245.865	-1.48561	0.213616	6.9546	3.53558e-12	1.0277e-10	0.797009	0.577658	0.773146	-0.791796	-0.704354
ENSMUSG00000031642.9	Sh3rf1	631.567	-1.61271	0.231981	6.95192	3.60352e-12	1.04525e-10	-0.2566	-0.0751241	-0.23172	-1.84711	-1.70949
ENSMUSG00000029664.10	Tfpi2	523.581	-1.71421	0.246751	6.94712	3.72807e-12	1.07911e-10	1.71314	1.41166	1.79984	-0.532429	0.369786
ENSMUSG00000031176.8	Dynlt3	823.627	1.13218	0.163056	-6.94349	3.82529e-12	1.10493e-10	-0.122359	-0.154135	0.0255288	0.869315	1.26044
ENSMUSG00000028576.12	Ift74	359.862	1.55793	0.22487	-6.92816	4.26359e-12	1.22897e-10	1.45344	1.12773	1.60032	2.98472	2.93449
ENSMUSG00000007891.16	Ctsd	9674.93	-0.858901	0.12404	6.92437	4.3792e-12	1.25945e-10	0.0578701	0.115808	0.12485	-0.709795	-0.799379
ENSMUSG00000022305.13	Lrp12	636.238	-1.0273	0.148366	6.9241	4.38759e-12	1.25945e-10	1.34462	1.29306	1.47468	0.421157	0.290278
ENSMUSG00000021500.17	Ddx46	1655.22	1.21958	0.176145	-6.92374	4.39887e-12	1.26007e-10	0.481907	0.129896	0.490027	1.36699	1.82952
ENSMUSG00000046312.4	Myorg	146.688	-1.79286	0.259176	6.91754	4.59558e-12	1.31369e-10	1.35263	1.44756	1.58093	-0.177831	-0.444172
ENSMUSG00000033161.10	Atp1a1	12834.2	-0.771892	0.111598	6.91674	4.62169e-12	1.31842e-10	1.07227	1.11963	1.04839	0.321252	0.312586
ENSMUSG00000021413.9	Prpf4b	1104.26	1.36658	0.19763	-6.91484	4.6838e-12	1.33339e-10	1.01963	0.57284	1.08784	1.9917	2.57266
ENSMUSG00000058600.13	Rpl30	2614.5	1.26487	0.183089	-6.90853	4.89698e-12	1.39121e-10	-3.58594	-3.39274	-3.58526	-2.04994	-2.42264
ENSMUSG00000025898.6	Cwf19l2	250.737	1.82376	0.264183	-6.90342	5.07652e-12	1.43925e-10	1.65086	1.22747	1.67916	3.09988	3.65656
ENSMUSG00000024270.11	Slc39a6	3794.57	-1.00013	0.144903	6.90209	5.12414e-12	1.44977e-10	1.48456	1.22681	1.51363	0.433038	0.387625
ENSMUSG00000040618.7	Pck2	1938.99	1.59758	0.231487	-6.90139	5.14979e-12	1.45405e-10	-0.0465179	-0.473084	-0.422044	1.26735	1.2886
ENSMUSG00000026457.14	Adipor1	2886.14	-0.881986	0.127824	6.90002	5.19952e-12	1.4651e-10	-1.6937	-1.4648	-1.48762	-2.43071	-2.41749
ENSMUSG00000014504.16	Srp19	534.105	1.08053	0.156647	-6.89786	5.27918e-12	1.48451e-10	-0.65123	-0.611086	-0.441718	0.548309	0.491932
ENSMUSG00000030530.15	Furin	3466.23	-1.00002	0.144987	6.89732	5.29912e-12	1.48709e-10	-0.641863	-0.870936	-0.780297	-1.88116	-1.64878
ENSMUSG00000037706.17	Cd81	11137.3	-0.739645	0.107316	6.89222	5.49267e-12	1.53828e-10	1.5491	1.49861	1.49701	0.889811	0.674589
ENSMUSG00000024608.11	Rps14	13799.8	1.17834	0.171073	-6.88794	5.66066e-12	1.58212e-10	-2.76627	-2.33282	-2.75462	-1.60114	-1.28244
ENSMUSG00000027236.8	Eif3j1	561.079	2.32066	0.337088	-6.88445	5.80104e-12	1.61808e-10	-6.85533	-6.08523	-6.22041	-4.33832	-3.71847
ENSMUSG00000032702.16	Kank1	689.907	-1.27783	0.185726	6.88018	5.97778e-12	1.66402e-10	0.0645777	0.204636	0.397976	-1.03508	-1.05042
ENSMUSG00000031634.13	Ufsp2	700.716	1.28919	0.187578	-6.87281	6.29485e-12	1.74875e-10	0.617984	0.397307	0.723003	1.83461	1.93552
ENSMUSG00000021701.8	Plk2	8472.25	-0.7505	0.109211	6.87202	6.32994e-12	1.75497e-10	0.934516	0.832061	1.11911	0.199506	0.237357
ENSMUSG00000037475.15	Thoc2	1001.81	1.63957	0.238874	-6.86373	6.70877e-12	1.85627e-10	1.8282	1.14216	1.85723	3.0135	3.5427
ENSMUSG00000006651.8	Aplp1	463.776	-1.37817	0.200843	6.86193	6.79371e-12	1.87601e-10	0.045062	0.246963	-0.181828	-1.37411	-1.27328
ENSMUSG00000002227.15	Mov10	884.156	1.32617	0.193303	-6.86056	6.8593e-12	1.89035e-10	0.0343979	-0.122018	-0.558337	1.23175	0.993182
ENSMUSG00000028599.10	Tnfrsf1b	488.269	1.35617	0.197761	-6.8576	7.00259e-12	1.92599e-10	0.246073	-0.277618	-0.0948486	1.45435	1.15591
ENSMUSG00000025290.17	Rps24	7686.21	1.32415	0.193137	-6.85601	7.08084e-12	1.94364e-10	-3.8785	-3.70371	-3.71782	-2.18524	-2.6568
ENSMUSG00000039089.15	L3mbtl3	617.673	-1.09304	0.159504	6.85276	7.24366e-12	1.98439e-10	0.995915	0.725449	0.961183	-0.208471	-0.179
ENSMUSG00000045083.14	Lingo2	60.612	-3.06847	0.447815	6.85209	7.27787e-12	1.98981e-10	0.902555	-0.353802	0.827829	-2.86302	-2.33829
ENSMUSG00000029174.18	Tbc1d1	2036.27	-0.926665	0.135454	6.84118	7.85432e-12	2.14318e-10	0.17671	0.0321538	0.190633	-0.883238	-0.695747
ENSMUSG00000032262.13	Elovl4	264.138	-1.63023	0.238359	6.83937	7.95407e-12	2.16611e-10	1.08595	0.714918	0.998089	-0.910538	-0.499115
ENSMUSG00000022098.10	Bmp1	4526.26	-1.10409	0.161445	6.83881	7.98552e-12	2.1704e-10	0.516415	0.663739	0.388867	-0.626707	-0.502104
ENSMUSG00000031004.8	Mki67	2526.75	1.9835	0.290151	-6.83609	8.13833e-12	2.20758e-10	2.13408	0.947987	1.75924	3.41454	3.76055
ENSMUSG00000028126.16	Pip5k1a	1769.13	-0.826136	0.120905	6.83296	8.31793e-12	2.25188e-10	-0.358823	-0.337867	-0.129404	-1.119	-1.06549
ENSMUSG00000019777.16	Hdac2	2603.96	0.874299	0.127986	-6.83124	8.41857e-12	2.27466e-10	0.729465	0.722592	0.870867	1.53497	1.78645
ENSMUSG00000070372.11	Capza1	1200.22	0.990045	0.144969	-6.82934	8.53075e-12	2.30047e-10	-2.18251	-2.29732	-2.17286	-1.19715	-1.24234
ENSMUSG00000031521.5	Aga	1171.02	-0.96737	0.141826	6.82084	9.05075e-12	2.43594e-10	1.34829	1.55712	1.63698	0.57974	0.531336
ENSMUSG00000035969.15	Rusc2	3268.32	-1.46149	0.214281	6.82044	9.07601e-12	2.43799e-10	-0.329681	0.111175	-0.293243	-1.72085	-1.50475
ENSMUSG00000063273.11	Naa15	2841.37	1.2726	0.186847	-6.81093	9.69672e-12	2.59966e-10	1.5288	1.03617	1.65893	2.57124	2.82066
ENSMUSG00000023232.17	Serinc2	621.179	-1.40299	0.206082	6.80794	9.90068e-12	2.6492e-10	-0.171411	-0.352654	-0.61936	-1.95837	-1.58611
ENSMUSG00000079641.3	Rpl39	3994.46	1.95408	0.287426	-6.79856	1.05671e-11	2.82206e-10	-8.55282	-7.91495	-8.22001	-5.79868	-6.87794
ENSMUSG00000049401.10	Ogfr	1826.53	1.06964	0.157355	-6.79761	1.06369e-11	2.8352e-10	-1.53246	-1.16577	-1.38122	-0.287886	-0.291668
ENSMUSG00000024339.12	Tap2	198.68	2.00074	0.294382	-6.7964	1.07268e-11	2.85367e-10	2.04829	1.88478	1.63825	3.96904	3.63516
ENSMUSG00000053175.17	Bcl3	91.5894	2.90115	0.427006	-6.79416	1.08946e-11	2.89273e-10	-0.532732	-1.42393	-0.801489	1.73713	2.26758
ENSMUSG00000000982.5	Ccl3	137.902	4.54367	0.668902	-6.79274	1.10026e-11	2.91278e-10	1.54524	0.816089	1.08543	5.79183	5.67848
ENSMUSG00000005233.16	Spc25	377.628	1.75454	0.258302	-6.79261	1.10123e-11	2.91278e-10	0.575216	0.353246	0.810757	2.3285	2.38874
ENSMUSG00000066571.13	4931406P16Rik	1022.42	-1.04299	0.153777	6.78247	1.18137e-11	3.11878e-10	1.1724	0.799233	1.18918	0.0580203	-0.025464
ENSMUSG00000040952.16	Rps19	8744.13	0.888551	0.131169	-6.77412	1.25168e-11	3.29809e-10	-2.91152	-2.86133	-2.94769	-1.97074	-2.0552
ENSMUSG00000038633.5	Degs1	6180.29	-0.75411	0.111389	6.77003	1.28757e-11	3.38618e-10	1.12321	1.14176	1.10948	0.41033	0.347847
ENSMUSG00000035575.11	Utp6	1254.13	0.930559	0.13777	-6.75446	1.43369e-11	3.7633e-10	0.389482	0.31459	0.324082	1.23689	1.31412
ENSMUSG00000102543.5	Pcdhgc5	294.805	-1.4692	0.217543	6.75363	1.44194e-11	3.77777e-10	2.64892	2.74652	2.48357	1.1797	1.13718
ENSMUSG00000041870.16	Ankrd13a	2029.04	-0.787335	0.116628	6.75083	1.46997e-11	3.84392e-10	-1.42894	-1.40507	-1.44699	-2.19789	-2.21566
ENSMUSG00000024943.9	Smc5	972.377	1.69169	0.250632	-6.7497	1.48153e-11	3.86084e-10	1.75822	1.05275	1.49788	2.77968	3.5487
ENSMUSG00000037149.10	Ddx1	3576.61	0.927428	0.137404	-6.74965	1.48204e-11	3.86084e-10	0.343758	0.195804	0.383264	1.24644	1.24087
ENSMUSG00000008540.11	Mgst1	237.951	1.79042	0.265475	-6.74419	1.53879e-11	4.00114e-10	1.14583	0.803024	1.38821	2.97284	2.85743
ENSMUSG00000023106.15	Denr	1175.94	1.08429	0.160835	-6.74159	1.5666e-11	4.06579e-10	-0.0300826	-0.361416	-0.0491236	0.938355	0.955147
ENSMUSG00000026576.12	Atp1b1	1023.78	-1.26117	0.187178	6.73781	1.60787e-11	4.16508e-10	1.27994	1.56189	1.74731	0.378187	0.186621
ENSMUSG00000020032.14	Nuak1	3313.47	-0.917933	0.136255	6.73686	1.61849e-11	4.18474e-10	-0.802806	-0.64067	-0.674482	-1.69267	-1.541
ENSMUSG00000022906.15	Parp9	451.553	5.25631	0.78157	-6.72532	1.75203e-11	4.52154e-10	1.09404	-0.658605	0.943878	5.77171	6.06572
ENSMUSG00000020074.7	Ccar1	1611	1.18678	0.176685	-6.71692	1.85601e-11	4.78097e-10	1.22958	0.797406	1.28063	2.17422	2.44052
ENSMUSG00000031596.15	Slc7a2	229.387	2.18394	0.325358	-6.71243	1.91403e-11	4.9121e-10	2.26711	1.09889	1.54887	3.78036	3.77712
ENSMUSG00000015656.17	Hspa8	27248.9	0.702326	0.104627	-6.71266	1.91114e-11	4.9121e-10	-3.56291	-3.56067	-3.55982	-2.88529	-2.82015
ENSMUSG00000056116.18	H2-T22	476.665	2.08069	0.31002	-6.71148	1.92658e-11	4.93511e-10	-4.84273	-5.60836	-5.8266	-3.0802	-3.44334
ENSMUSG00000070544.6	Top1	2117.56	1.2027	0.179401	-6.70396	2.02851e-11	5.1866e-10	0.87746	0.520562	0.896416	1.74028	2.24702
ENSMUSG00000028249.15	Sdcbp	5054.58	1.12401	0.167877	-6.6954	2.15077e-11	5.48903e-10	0.691642	0.642781	0.847664	1.6706	2.07757
ENSMUSG00000041736.7	Tspo	2498.27	1.05741	0.157942	-6.69493	2.15775e-11	5.49669e-10	0.396885	0.602124	0.409978	1.57936	1.47469
ENSMUSG00000026883.17	Dab2ip	1355.13	-1.25135	0.187041	6.69023	2.22813e-11	5.66552e-10	-0.232156	-0.136092	-0.396004	-1.45171	-1.52572
ENSMUSG00000027656.7	Ccn5	331.28	4.41626	0.660165	-6.68963	2.2373e-11	5.67837e-10	-0.298299	-1.86718	-1.4685	3.27507	3.06803
ENSMUSG00000018189.12	Uchl5	757.783	1.07152	0.160327	-6.68333	2.3357e-11	5.91724e-10	1.11333	0.898146	1.2081	2.1345	2.17315
ENSMUSG00000034947.13	Tmem106a	133.431	2.02864	0.303679	-6.68021	2.38599e-11	6.02255e-10	0.137154	0.234587	-0.588666	1.92454	2.00553
ENSMUSG00000046856.13	Gpr1	88.2176	-2.39929	0.359153	6.68043	2.38245e-11	6.02255e-10	1.59057	1.99376	1.56287	-0.859687	-0.514599
ENSMUSG00000029406.15	Pitpnm2	1132.69	-1.20779	0.180816	6.67968	2.39459e-11	6.03004e-10	-2.13391	-2.1173	-2.28041	-3.2457	-3.50075
ENSMUSG00000036155.13	Mgat5	370.814	-1.47994	0.221565	6.67949	2.39769e-11	6.03004e-10	0.213793	-0.139275	0.260736	-1.28131	-1.46977
ENSMUSG00000034075.10	Zdhhc5	1843.34	-0.855325	0.128124	6.67574	2.45981e-11	6.17503e-10	-0.515698	-0.819035	-0.635087	-1.51473	-1.50135
ENSMUSG00000031229.16	Atrx	1556.52	1.32618	0.198691	-6.67458	2.47939e-11	6.21286e-10	2.18521	1.64005	2.20565	3.1995	3.4899
ENSMUSG00000037736.20	Limch1	1111.76	-1.26047	0.188875	6.67354	2.4971e-11	6.24592e-10	-0.431788	-0.156394	-0.221892	-1.29275	-1.75303
ENSMUSG00000006301.17	Tmbim1	3340.91	-0.734236	0.110051	6.67175	2.52769e-11	6.31101e-10	0.040936	0.141698	0.180938	-0.656288	-0.556552
ENSMUSG00000028226.15	Mmp16	337.774	-1.38531	0.207752	6.6681	2.59129e-11	6.45811e-10	1.58368	1.77786	1.94457	0.408957	0.391
ENSMUSG00000020641.16	Rsad2	92.8478	4.49838	0.674753	-6.66671	2.61594e-11	6.5078e-10	2.7092	-1.0941	0.972687	5.59699	5.49679
ENSMUSG00000035293.13	G2e3	379.472	1.77034	0.265741	-6.66192	2.70281e-11	6.69977e-10	1.55696	1.23265	2.04116	3.37832	3.44992
ENSMUSG00000027170.12	Eif3m	1717	0.996594	0.149591	-6.66213	2.69894e-11	6.69977e-10	-1.13714	-1.02472	-1.05465	-0.155496	0.00477361
ENSMUSG00000038235.4	F11r	440.227	-1.20863	0.181459	6.66061	2.7269e-11	6.74736e-10	0.886672	1.02539	0.86076	-0.220424	-0.312867
ENSMUSG00000001128.7	Cfp	160.163	2.41515	0.362837	-6.65629	2.80827e-11	6.93628e-10	0.339914	-0.0206335	0.543324	2.56942	2.96665
ENSMUSG00000027996.13	Sfrp2	520.29	2.04714	0.307636	-6.65442	2.84411e-11	7.01225e-10	2.33165	1.34044	1.82634	3.79634	3.94616
ENSMUSG00000025498.15	Irf7	190.183	5.43922	0.818356	-6.64652	3.00106e-11	7.38604e-10	-0.7164	-0.966545	-0.927053	4.15748	5.20548
ENSMUSG00000062488.9	Ifit3b	40.3438	6.09408	0.918835	-6.63241	3.30261e-11	8.11371e-10	0.834731	-1.55474	-0.696232	5.61548	5.12217
ENSMUSG00000031221.7	Igbp1	946.408	0.943461	0.142278	-6.6311	3.33185e-11	8.17101e-10	0.10512	0.210642	0.0457239	1.11933	1.01225
ENSMUSG00000024163.17	Mapk8ip3	651.372	-1.08223	0.163245	6.62948	3.36867e-11	8.24668e-10	-0.935747	-0.762046	-0.653812	-1.73269	-1.97887
ENSMUSG00000001552.14	Jup	6288.95	-1.16511	0.175916	6.62311	3.51726e-11	8.5952e-10	0.209833	0.391958	0.0960159	-1.05873	-0.778349
ENSMUSG00000030751.18	Psma1	3074.68	0.99546	0.150399	-6.6188	3.62136e-11	8.83393e-10	0.558885	0.738639	0.862855	1.69387	1.75283
ENSMUSG00000028577.13	Plaa	2165.75	1.11772	0.168884	-6.61827	3.63418e-11	8.84959e-10	0.968886	0.818027	1.25532	1.96766	2.34291
ENSMUSG00000064360.1	mt-Nd3	147.015	2.75787	0.416748	-6.6176	3.65086e-11	8.87455e-10	-3.50735	-2.49237	-1.63275	0.688824	-0.150735
ENSMUSG00000031996.17	Aplp2	5210.53	-0.977966	0.147875	6.61347	3.75419e-11	9.10968e-10	1.38586	1.1586	1.27562	0.290188	0.306534
ENSMUSG00000030835.6	Nomo1	4839.9	-0.801556	0.121212	6.61286	3.76961e-11	9.13105e-10	0.716367	0.562292	0.63085	-0.124804	-0.194581
ENSMUSG00000028410.13	Dnaja1	1398.64	1.03972	0.157445	-6.60367	4.01108e-11	9.69894e-10	-2.4232	-2.51723	-2.2214	-1.43762	-1.22969
ENSMUSG00000018930.3	Ccl4	87.3657	4.52919	0.686061	-6.60173	4.06397e-11	9.80966e-10	2.5717	1.62344	0.56403	6.29214	5.52462
ENSMUSG00000021615.13	Xrcc4	140.775	2.46845	0.374323	-6.59445	4.26843e-11	1.02852e-09	0.668109	1.13983	1.40206	3.23468	3.99152
ENSMUSG00000020271.17	Fbxw11	1882.2	-0.756717	0.114775	6.59306	4.30854e-11	1.03638e-09	-0.0635076	-0.0343116	0.129767	-0.745996	-0.728427
ENSMUSG00000028989.3	Angptl7	96.0404	2.58388	0.392126	-6.58941	4.41584e-11	1.06034e-09	1.32756	0.712418	0.676873	3.49481	3.50388
ENSMUSG00000053398.11	Phgdh	5582.99	1.01896	0.154732	-6.58534	4.53859e-11	1.08792e-09	-3.82233	-3.73173	-4.09651	-2.89167	-2.82906
ENSMUSG00000028282.12	Casp8ap2	304.557	1.76409	0.267947	-6.58375	4.58739e-11	1.09771e-09	1.47208	0.803343	1.70492	3.01151	3.2102
ENSMUSG00000030144.4	Clec4d	78.8821	3.11128	0.473	-6.57776	4.776e-11	1.14087e-09	0.153845	-0.389592	0.140842	3.26693	2.77876
ENSMUSG00000027708.14	Dcun1d1	246.555	1.58294	0.240973	-6.56893	5.06783e-11	1.20849e-09	-1.76892	-2.05955	-1.78881	-0.237277	-0.343539
ENSMUSG00000034707.7	Gns	4044.27	-1.11804	0.170215	6.56837	5.08676e-11	1.21091e-09	0.548045	0.401202	0.305421	-0.603281	-0.778868
ENSMUSG00000046432.12	Bex3	4312.62	-1.26844	0.193279	6.56273	5.28328e-11	1.25553e-09	-0.458485	0.204531	0.0411634	-1.31654	-1.37544
ENSMUSG00000020818.16	Mfsd11	816.737	-1.02141	0.155722	6.55918	5.4105e-11	1.28355e-09	0.177981	0.225594	0.331526	-0.826647	-0.708728
ENSMUSG00000032221.14	Mns1	133.469	1.88782	0.28802	-6.55447	5.58385e-11	1.32241e-09	0.379828	0.207997	0.46583	2.15777	2.36122
ENSMUSG00000038047.18	Haus6	430.557	1.49451	0.228106	-6.55181	5.68446e-11	1.34393e-09	0.735245	0.562814	0.875945	2.06293	2.4692
ENSMUSG00000031722.10	Hp	83.0754	7.46954	1.14018	-6.55119	5.7081e-11	1.34721e-09	1.63538	-1.18391	0.071498	6.32197	8.7465
ENSMUSG00000034254.17	Agpat1	2127.67	-0.816704	0.124755	6.54648	5.89098e-11	1.388e-09	-2.30176	-2.32142	-2.3068	-3.14208	-3.09772
ENSMUSG00000023947.8	Nfkbie	106.55	2.04674	0.312823	-6.54281	6.03725e-11	1.42004e-09	-0.872743	-0.646183	-0.745093	1.55516	1.03796
ENSMUSG00000025225.15	Nfkb2	1806.41	0.932721	0.142571	-6.54215	6.06423e-11	1.42396e-09	-0.201165	-0.493711	-0.51656	0.564941	0.505259
ENSMUSG00000027820.12	Mme	84.1516	3.28135	0.502086	-6.53543	6.3428e-11	1.48684e-09	1.59871	0.903045	0.699023	4.36701	4.18784
ENSMUSG00000062014.13	Gmfb	1297.72	1.1653	0.178317	-6.53496	6.36285e-11	1.48901e-09	-0.773951	-0.879533	-0.535712	0.305385	0.614882
ENSMUSG00000037608.16	Bclaf1	2579.59	1.28381	0.196487	-6.5338	6.41211e-11	1.498e-09	1.06419	0.820618	1.13583	2.04337	2.60869
ENSMUSG00000032249.14	Anp32a	1194.5	1.06189	0.162678	-6.52757	6.68433e-11	1.55896e-09	-0.415965	-0.761943	-0.550535	0.468643	0.508318
ENSMUSG00000015733.13	Capza2	3046.46	0.946822	0.145115	-6.52464	6.81651e-11	1.58711e-09	0.433436	0.274166	0.730473	1.41304	1.46569
ENSMUSG00000022587.14	Ly6e	3661.01	0.869501	0.133361	-6.5199	7.03526e-11	1.63528e-09	0.430524	0.287302	0.1692	1.21855	1.11232
ENSMUSG00000017057.9	Il13ra1	318.931	2.19827	0.337281	-6.51763	7.14275e-11	1.65748e-09	1.65694	0.268113	1.04896	3.09016	3.21602
ENSMUSG00000021737.4	Psmd6	3296.97	0.956474	0.146817	-6.51473	7.28191e-11	1.68694e-09	0.874796	0.827116	1.11203	1.87867	1.93174
ENSMUSG00000042677.7	Zc3h12a	154.381	1.82518	0.28019	-6.51407	7.31409e-11	1.69155e-09	0.0836925	-0.395624	-0.413565	1.40506	1.79427
ENSMUSG00000010051.15	Hyal1	261.669	-1.54731	0.237546	6.51374	7.33014e-11	1.69243e-09	2.14438	2.32115	2.21815	0.668363	0.734419
ENSMUSG00000057596.13	Trim30d	64.0835	3.66759	0.563224	-6.51177	7.4268e-11	1.71188e-09	1.16194	0.492771	1.53657	4.79028	4.75356
ENSMUSG00000038170.15	Pde4dip	1702.21	-0.940816	0.144557	6.50829	7.60118e-11	1.74916e-09	0.569876	0.472985	0.638814	-0.381581	-0.365944
ENSMUSG00000031403.14	Dkc1	1108.56	1.17236	0.180274	-6.50323	7.86143e-11	1.80604e-09	0.523828	0.216674	0.3372	1.44435	1.63111
ENSMUSG00000017485.11	Top2b	2682.14	1.51851	0.233604	-6.50037	8.01234e-11	1.83765e-09	1.69285	1.11532	1.7109	2.76118	3.38395
ENSMUSG00000030096.8	Slc6a6	6256.02	-1.01176	0.155666	6.49951	8.05834e-11	1.84513e-09	0.97887	0.806083	0.865312	-0.171618	-0.0761569
ENSMUSG00000021040.15	Slirp	897.582	1.48661	0.228745	-6.49899	8.08631e-11	1.84847e-09	3.25483	3.40798	3.75157	5.28969	4.65817
ENSMUSG00000032532.7	Cck	121.749	2.38921	0.367722	-6.49733	8.17587e-11	1.86585e-09	-0.554426	0.0368204	0.545772	2.41764	2.48695
ENSMUSG00000039952.15	Dag1	3523.55	-1.00863	0.155447	6.48859	8.66437e-11	1.97408e-09	1.17894	1.09725	1.01126	0.234089	-0.0544169
ENSMUSG00000021143.10	Pacs2	1297.84	-0.989724	0.15256	6.48743	8.73114e-11	1.98601e-09	-2.08399	-2.20183	-2.36917	-3.18763	-3.20949
ENSMUSG00000051223.14	Bzw1	4911.93	0.925723	0.142946	-6.47602	9.41722e-11	2.13855e-09	-0.602918	-0.627826	-0.546763	0.276007	0.417369
ENSMUSG00000026342.10	Slc35f5	681.65	-0.979555	0.151286	6.47486	9.4898e-11	2.15149e-09	0.657793	0.727407	0.901358	-0.194032	-0.211968
ENSMUSG00000027014.14	Cwc22	316.47	1.45498	0.224927	-6.46871	9.88459e-11	2.23732e-09	-0.0541884	-0.492007	0.083091	1.08171	1.56474
ENSMUSG00000021707.5	Dhfr	393.916	1.35822	0.210019	-6.46712	9.98886e-11	2.25722e-09	0.523507	0.400238	0.130325	1.66143	1.72045
ENSMUSG00000020994.5	Pnn	1095.42	1.24831	0.19304	-6.4666	1.0023e-10	2.26125e-09	1.05958	0.5969	0.900047	1.80997	2.43658
ENSMUSG00000027555.8	Car13	305.244	1.50461	0.232738	-6.46481	1.01426e-10	2.28448e-09	0.378231	0.0556777	0.519504	1.98749	1.64271
ENSMUSG00000067367.9	Lyar	905.338	1.21344	0.187738	-6.46349	1.02316e-10	2.30077e-09	0.232334	-0.00253095	0.399179	1.37219	1.50195
ENSMUSG00000038900.17	Rpl12	10385	1.43225	0.221602	-6.46318	1.02526e-10	2.30175e-09	-8.29406	-8.10741	-8.59658	-6.85619	-6.93736
ENSMUSG00000019792.8	Trmt11	141.828	2.10637	0.325965	-6.46196	1.03358e-10	2.31291e-09	1.64371	0.824245	1.34856	3.29369	3.44914
ENSMUSG00000003518.13	Dusp3	1755.51	-0.858562	0.132864	6.46198	1.03342e-10	2.31291e-09	-0.862172	-0.822638	-0.921941	-1.79484	-1.64461
ENSMUSG00000020155.2	Kcnmb1	168.134	-1.93581	0.299785	6.45732	1.06576e-10	2.38106e-09	-0.80408	-0.13279	-0.454202	-2.70965	-2.12383
ENSMUSG00000001376.17	Vps50	657.565	1.30346	0.202098	-6.44963	1.12124e-10	2.50096e-09	0.84367	0.578196	1.06385	2.00607	2.32699
ENSMUSG00000067786.16	Nnat	658.043	-1.49925	0.232553	6.44691	1.14152e-10	2.5421e-09	-1.07098	-0.548518	-0.399477	-2.23459	-2.0993
ENSMUSG00000060073.9	Psma3	1472.48	0.958143	0.14872	-6.44259	1.1745e-10	2.60718e-09	-2.38469	-2.68068	-2.54264	-1.43585	-1.71225
ENSMUSG00000000184.12	Ccnd2	19705	-0.636601	0.0988114	6.44259	1.17453e-10	2.60718e-09	-0.321859	-0.427822	-0.3913	-1.02818	-0.994412
ENSMUSG00000035168.16	Tanc1	2355.13	-1.17802	0.183004	6.43716	1.21734e-10	2.69787e-09	1.06338	0.488039	0.781616	-0.456451	-0.364325
ENSMUSG00000025044.16	Msr1	152.56	2.79087	0.433981	-6.43085	1.26889e-10	2.80453e-09	1.1047	1.26337	1.48427	3.75066	4.75578
ENSMUSG00000028173.10	Wls	6610.59	-0.733935	0.114129	6.43078	1.26952e-10	2.80453e-09	1.50147	1.5363	1.71911	0.821369	0.900029
ENSMUSG00000068245.14	Phf11d	105.539	6.99419	1.08798	-6.42863	1.28762e-10	2.83997e-09	-0.750232	1.67402	2.21889	8.22474	8.27782
ENSMUSG00000036202.16	Rif1	609.54	1.72757	0.26884	-6.426	1.31007e-10	2.88464e-09	2.94452	1.9124	2.78817	4.27768	4.21698
ENSMUSG00000054675.5	Tmem119	759.697	1.14905	0.178826	-6.42553	1.31414e-10	2.88464e-09	-0.223504	-0.326296	-0.39757	0.720082	0.944999
ENSMUSG00000003810.13	Mast2	2313.19	-0.958858	0.149224	6.42561	1.3134e-10	2.88464e-09	-1.69849	-2.08415	-1.98705	-2.9067	-2.8557
ENSMUSG00000030987.5	Stim1	649.188	-1.06415	0.165648	6.42415	1.32612e-10	2.90631e-09	-0.340517	-0.0937921	-0.234544	-1.24706	-1.29473
ENSMUSG00000024190.7	Dusp1	1769.5	-1.35406	0.210946	6.41898	1.37195e-10	3.00198e-09	0.632762	1.2454	1.13655	-0.348601	-0.337916
ENSMUSG00000032399.8	Rpl4	26235.5	0.815172	0.126999	-6.41873	1.37419e-10	3.00213e-09	-1.37099	-1.36333	-1.33037	-0.526722	-0.541538
ENSMUSG00000092035.8	Peg10	1997.57	-1.28043	0.199901	6.40531	1.50064e-10	3.27319e-09	1.15119	1.57749	1.41374	0.0575625	0.192772
ENSMUSG00000041075.8	Fzd7	2304.96	-1.34754	0.210427	6.40382	1.51537e-10	3.30011e-09	0.990664	1.13026	1.26229	-0.156149	-0.267707
ENSMUSG00000022307.16	Oxr1	575.299	1.3869	0.216782	-6.39769	1.5774e-10	3.42502e-09	0.802503	0.378315	0.866935	1.85267	2.35139
ENSMUSG00000051579.10	Tceal8	2655.36	0.70021	0.109448	-6.39767	1.57769e-10	3.42502e-09	0.263928	0.350709	0.328523	0.998587	1.04443
ENSMUSG00000043556.10	Fbxl7	284.082	-1.42434	0.222718	6.39529	1.60241e-10	3.47324e-09	-0.699495	-0.857666	-0.886667	-2.11008	-2.34097
ENSMUSG00000073802.5	Cdkn2b	1008.38	-1.54507	0.241609	6.3949	1.60656e-10	3.47678e-09	-0.636679	-0.122238	-0.299643	-1.8775	-1.9016
ENSMUSG00000059070.16	Rpl18	11447.8	0.922998	0.144393	-6.39226	1.63455e-10	3.5318e-09	-5.17548	-5.12512	-5.28178	-4.2227	-4.31602
ENSMUSG00000032113.16	Chek1	217.134	2.06395	0.322956	-6.39083	1.64991e-10	3.55387e-09	1.39411	0.982435	1.82085	3.66137	3.29744
ENSMUSG00000006005.18	Tpr	4656.11	1.50005	0.234716	-6.39094	1.64864e-10	3.55387e-09	1.96688	1.35331	1.83385	2.92192	3.57428
ENSMUSG00000028358.15	Zfp618	271.57	-1.36761	0.214106	6.38755	1.68567e-10	3.62524e-09	-0.045345	-0.482967	-0.21163	-1.58566	-1.64475
ENSMUSG00000031697.12	Orc6	997.805	1.06589	0.166973	-6.3836	1.72975e-10	3.71425e-09	0.42414	0.387955	0.627628	1.5037	1.60088
ENSMUSG00000021133.9	Susd6	1675.56	-0.904541	0.141713	6.38293	1.73733e-10	3.72473e-09	-0.808663	-0.779592	-0.636252	-1.56772	-1.7059
ENSMUSG00000035208.16	Slfn8	81.749	5.53039	0.866747	-6.38062	1.76367e-10	3.77535e-09	1.83473	-1.18391	1.705	7.23678	6.36199
ENSMUSG00000029781.7	Fkbp9	6698.97	-0.805892	0.126416	6.37492	1.83057e-10	3.91248e-09	0.852143	0.650561	0.754292	0.0140981	-0.114941
ENSMUSG00000062270.14	Morf4l1	2356.17	0.982209	0.154161	-6.37133	1.87392e-10	3.99895e-09	-2.42439	-2.20942	-2.42737	-1.27095	-1.46595
ENSMUSG00000056394.17	Lig1	834.695	0.971744	0.152531	-6.37081	1.88031e-10	4.00641e-09	-0.451891	-0.555322	-0.565402	0.438193	0.452927
ENSMUSG00000016833.14	Mrps18c	314.844	1.33489	0.209555	-6.37013	1.88868e-10	4.01803e-09	0.905051	0.552023	0.838046	2.23846	1.97773
ENSMUSG00000015647.9	Lama5	2230.77	-1.52193	0.239014	6.36754	1.92082e-10	4.08013e-09	2.79361	2.29396	2.32697	1.08934	0.806861
ENSMUSG00000005397.8	Nid1	20493.3	-1.34361	0.211041	6.36657	1.93308e-10	4.09984e-09	2.44512	1.94237	2.0623	0.799221	0.792553
ENSMUSG00000050891.10	Tatdn1	228.705	1.52806	0.240025	-6.36623	1.93729e-10	4.10249e-09	0.642184	0.518105	0.783198	2.18185	2.20193
ENSMUSG00000003363.15	Pld3	2252.31	-0.837971	0.13166	6.36466	1.95727e-10	4.13845e-09	1.17169	1.22623	1.03234	0.321	0.305464
ENSMUSG00000062981.5	Mrpl42	422.334	1.29149	0.203002	-6.36193	1.99235e-10	4.20617e-09	-1.51734	-1.35244	-1.56122	-0.408516	0.0540903
ENSMUSG00000031714.9	Gab1	431.953	-1.32409	0.208414	6.35319	2.10891e-10	4.44546e-09	1.18947	0.809641	0.921854	-0.490724	-0.228456
ENSMUSG00000049723.14	Mmp12	131.129	2.78665	0.438791	-6.35075	2.14262e-10	4.50962e-09	1.55539	1.6037	1.50554	4.34294	4.47038
ENSMUSG00000029191.16	Rfc1	787.277	1.52276	0.239918	-6.34701	2.19537e-10	4.61122e-09	0.482769	-0.0545922	0.490006	1.60812	2.13085
ENSMUSG00000020432.12	Tcn2	1521.01	-1.09259	0.172146	6.34686	2.19757e-10	4.61122e-09	0.828696	1.19636	0.901961	-0.0828626	-0.116717
ENSMUSG00000031486.15	Adgra2	3732.75	-0.853114	0.134426	6.34633	2.20507e-10	4.61994e-09	-0.603391	-0.49187	-0.499368	-1.33383	-1.41349
ENSMUSG00000031592.10	Pcm1	1328.22	1.53634	0.242151	-6.34457	2.23055e-10	4.66624e-09	2.23336	1.78357	2.38043	3.38549	4.07292
ENSMUSG00000079017.3	Ifi27l2a	107.614	7.14323	1.12647	-6.34123	2.27935e-10	4.76112e-09	2.85778	-1.0941	-1.38695	6.73887	7.6405
ENSMUSG00000074934.3	Grem1	1595.78	1.13408	0.178852	-6.3409	2.2843e-10	4.76425e-09	0.298091	0.307391	0.485783	1.24183	1.80098
ENSMUSG00000023809.10	Rps6ka2	874.595	-1.21564	0.191823	6.3373	2.33834e-10	4.8696e-09	-2.09763	-1.63548	-1.99319	-3.27377	-2.95192
ENSMUSG00000031245.8	Hmgn5	101.714	2.13691	0.337391	-6.33362	2.39477e-10	4.97961e-09	-0.882008	-0.816411	-1.43342	1.01288	1.21967
ENSMUSG00000062515.3	Fabp4	102.271	3.72252	0.588343	-6.32712	2.49774e-10	5.18591e-09	0.377615	-0.103755	0.927402	3.10789	4.76538
ENSMUSG00000029208.16	Guf1	157.891	1.77659	0.280817	-6.3265	2.50792e-10	5.19922e-09	0.888047	0.20802	0.720733	2.47743	2.27608
ENSMUSG00000049988.5	Lrrc25	68.3649	3.47818	0.549819	-6.32604	2.51526e-10	5.20663e-09	1.00831	-1.24873	0.213793	3.37842	4.08147
ENSMUSG00000018800.14	Abca5	667.319	-1.61856	0.255995	6.32264	2.57139e-10	5.31485e-09	2.08498	2.34765	2.66845	0.644877	0.899608
ENSMUSG00000036986.16	Pml	2325.65	0.839183	0.132768	-6.32069	2.60399e-10	5.37419e-09	0.239773	0.151884	-0.0452588	1.01769	0.898387
ENSMUSG00000028459.11	Cd72	104.344	2.67658	0.423543	-6.31949	2.62432e-10	5.40805e-09	0.733399	0.532617	0.275135	3.14781	3.00326
ENSMUSG00000068823.10	Csde1	4874.63	0.951399	0.150627	-6.31626	2.67964e-10	5.51382e-09	-0.276882	-0.386398	-0.0224755	0.662527	0.813576
ENSMUSG00000020176.17	Grb10	21108.4	-0.708561	0.112289	6.31018	2.78713e-10	5.7226e-09	0.721359	0.534032	0.647189	-0.0199291	-0.118333
ENSMUSG00000022607.18	Ptk2	2277.19	-0.713216	0.113028	6.31005	2.78939e-10	5.7226e-09	-0.0144074	0.0219743	0.109801	-0.734688	-0.596662
ENSMUSG00000043017.9	Ptgir	50.3159	3.81107	0.604024	-6.30947	2.7999e-10	5.73565e-09	1.41117	-0.359325	-0.81793	3.98742	3.39271
ENSMUSG00000031711.7	Zfp330	417.861	1.11154	0.176382	-6.30191	2.94009e-10	6.0139e-09	-0.775834	-0.624221	-0.798727	0.314729	0.447802
ENSMUSG00000032766.9	Gng11	959.455	-1.39987	0.222145	6.30161	2.9457e-10	6.01645e-09	-0.921789	-0.831702	-0.665632	-2.50032	-1.97004
ENSMUSG00000029655.17	N4bp2l2	698.219	1.30014	0.206351	-6.30062	2.96463e-10	6.04618e-09	0.467925	0.383637	0.777309	1.61708	2.15907
ENSMUSG00000007805.4	Twist2	744.545	1.30173	0.206656	-6.29904	2.99488e-10	6.09886e-09	0.863018	0.0180842	0.459363	1.65054	1.85558
ENSMUSG00000026779.6	Mastl	360.226	1.65232	0.262389	-6.29723	3.03015e-10	6.1616e-09	1.60045	1.1527	1.84998	2.95363	3.53911
ENSMUSG00000035441.14	Myo1d	1391.99	-1.05271	0.167209	6.29573	3.05948e-10	6.212e-09	0.441798	0.205417	0.313009	-0.971623	-0.510442
ENSMUSG00000027519.10	Rab22a	771.723	-1.09105	0.173305	6.29551	3.06393e-10	6.212e-09	-1.13667	-1.4601	-1.0744	-2.15619	-2.46674
ENSMUSG00000038860.15	Garnl3	229.524	-1.76642	0.280614	6.29484	3.07722e-10	6.22979e-09	-0.73455	-0.13636	-0.814275	-2.34146	-2.23389
ENSMUSG00000027797.15	Dclk1	659.653	1.34333	0.213642	-6.28776	3.22087e-10	6.51106e-09	0.727708	0.113667	0.616087	1.69648	1.99938
ENSMUSG00000021367.8	Edn1	275.702	-1.46432	0.232898	6.28738	3.22876e-10	6.51746e-09	0.502634	0.549069	0.930588	-0.788976	-0.788725
ENSMUSG00000007659.18	Bcl2l1	1708.42	-0.824736	0.131229	6.28472	3.28446e-10	6.62023e-09	-1.35331	-1.37907	-1.45459	-2.27675	-2.14315
ENSMUSG00000000682.7	Cd52	72.7742	2.72933	0.43434	-6.28386	3.30276e-10	6.64741e-09	0.699516	-0.0359553	0.368391	2.90325	3.17383
ENSMUSG00000021981.10	Cab39l	324.866	1.32199	0.210414	-6.28279	3.32544e-10	6.6833e-09	-2.2239	-2.3097	-1.96333	-0.9352	-0.727961
ENSMUSG00000071644.10	Eef1g	22330.2	1.20211	0.191449	-6.27901	3.40742e-10	6.83812e-09	-5.97104	-5.50958	-6.26418	-4.76052	-4.62304
ENSMUSG00000079215.8	Zfp664	752.866	-1.249	0.198945	6.27811	3.42708e-10	6.86257e-09	-2.23069	-2.18947	-1.56625	-3.23412	-3.22589
ENSMUSG00000023868.17	Pde10a	151.542	-1.68462	0.268337	6.278	3.42954e-10	6.86257e-09	-0.151104	-0.270663	-0.557686	-1.96811	-2.01779
ENSMUSG00000005533.10	Igf1r	3842.19	-1.10619	0.176333	6.27327	3.53536e-10	7.06407e-09	1.07735	0.80143	0.903736	-0.161582	-0.196728
ENSMUSG00000027848.12	Olfml3	902.348	1.85436	0.295719	-6.2707	3.59435e-10	7.17157e-09	0.754151	-0.0759161	0.238789	2.27834	1.98302
ENSMUSG00000044447.5	Dock5	1115.07	-0.934132	0.149191	6.26134	3.81691e-10	7.60462e-09	0.00158358	-0.0956348	-0.0342964	-0.968962	-0.967393
ENSMUSG00000003955.8	Fam162a	1244.25	1.17428	0.18759	-6.25981	3.85442e-10	7.6683e-09	0.324591	0.0135521	0.501739	1.4259	1.5192
ENSMUSG00000001305.5	Rrp15	509.911	1.03422	0.165268	-6.25787	3.90262e-10	7.75301e-09	-0.441671	-0.642835	-0.564583	0.367459	0.604737
ENSMUSG00000020023.18	Tmcc3	1246.59	-1.10132	0.176002	6.2574	3.91448e-10	7.7654e-09	-0.636092	-0.660859	-0.643766	-1.72173	-1.75265
ENSMUSG00000002289.16	Angptl4	508.239	1.13984	0.182288	-6.25295	4.02777e-10	7.97868e-09	0.546277	0.383376	0.363331	1.58499	1.59384
ENSMUSG00000058258.14	Idi1	106.278	2.69027	0.430639	-6.24717	4.17956e-10	8.26751e-09	-2.98808	-3.6588	-2.67036	-0.581603	-0.131805
ENSMUSG00000036052.14	Dnajb5	477.066	-1.0896	0.174526	6.24322	4.2866e-10	8.46712e-09	-0.575298	-0.478481	-0.465303	-1.69375	-1.49999
ENSMUSG00000004642.13	Slbp	792.217	0.920649	0.14747	-6.24297	4.29352e-10	8.46866e-09	0.611242	0.564188	0.728687	1.51372	1.60916
ENSMUSG00000031530.6	Dusp4	2208.91	-1.46428	0.234561	6.24261	4.30317e-10	8.47559e-09	0.060232	0.362825	0.275618	-1.52071	-0.961517
ENSMUSG00000004317.14	Clcn5	2172.66	-1.31668	0.210934	6.24215	4.31591e-10	8.48858e-09	1.36061	0.937963	1.44229	-0.107778	-0.0480453
ENSMUSG00000039982.8	Dtx4	231.121	-1.48402	0.237819	6.24012	4.37233e-10	8.5873e-09	-0.815649	-1.10662	-1.00292	-2.49361	-2.43634
ENSMUSG00000020409.10	Slu7	743.709	0.926906	0.148641	-6.23587	4.49272e-10	8.81121e-09	0.37876	0.181821	0.353392	1.32968	1.1406
ENSMUSG00000025610.7	Map3k7cl	362.235	-1.61645	0.259245	6.23525	4.51071e-10	8.83396e-09	-1.40425	-1.50419	-1.07688	-3.10862	-2.818
ENSMUSG00000072825.11	Cep170b	2935.29	-1.04681	0.167943	6.23312	4.57226e-10	8.94181e-09	-0.863784	-0.958506	-1.21098	-1.91935	-2.16994
ENSMUSG00000022338.8	Eny2	590.293	1.10482	0.177274	-6.2323	4.59644e-10	8.97639e-09	-0.345181	-0.161922	-0.0704142	0.890963	0.945773
ENSMUSG00000053113.3	Socs3	173.877	1.64869	0.264623	-6.23034	4.65419e-10	9.07633e-09	-0.569377	-1.13054	-0.849225	0.789802	0.82006
ENSMUSG00000027198.16	Ext2	2649.08	-0.732117	0.117523	6.22956	4.67749e-10	9.10889e-09	0.600937	0.65551	0.582414	-0.0444759	-0.177174
ENSMUSG00000030619.10	Eed	1026.4	0.811113	0.130307	-6.22462	4.82732e-10	9.38743e-09	0.760087	0.692271	0.876675	1.59927	1.59116
ENSMUSG00000016382.15	Pls3	8331.83	1.14878	0.18485	-6.21466	5.1435e-10	9.98822e-09	0.62267	0.546107	0.643859	1.48052	2.08919
ENSMUSG00000020766.4	Galk1	2124.31	0.908591	0.14622	-6.21387	5.16937e-10	1.00244e-08	-0.918986	-0.73524	-1.04886	-0.00171643	0.0279522
ENSMUSG00000024521.8	Pmaip1	1093.02	-1.52939	0.246194	6.21216	5.22622e-10	1.01204e-08	-0.0992476	0.287207	0.293637	-1.51841	-1.2182
ENSMUSG00000003226.7	Ranbp2	3458.93	1.47965	0.238302	-6.20913	5.32794e-10	1.03029e-08	2.11746	1.5473	2.19114	3.18866	3.70986
ENSMUSG00000035901.14	Dennd5a	2283.48	-0.827262	0.133278	6.20705	5.39877e-10	1.04253e-08	-1.85718	-2.02228	-1.89442	-2.61239	-2.89035
ENSMUSG00000026683.14	Nuf2	480.181	1.53512	0.247363	-6.20596	5.43645e-10	1.04834e-08	0.785677	0.369809	0.95485	2.29324	2.20693
ENSMUSG00000040034.15	Nup43	574.442	1.20259	0.19395	-6.2005	5.62834e-10	1.08383e-08	0.996782	0.867465	1.19073	2.29982	2.16328
ENSMUSG00000031709.15	Tbc1d9	287.147	-1.48246	0.239123	6.19955	5.66241e-10	1.08887e-08	0.570507	0.0894544	0.141809	-1.25278	-1.15407
ENSMUSG00000026083.12	Eif5b	3003.55	1.16223	0.187508	-6.19831	5.70715e-10	1.09595e-08	0.375185	-0.125885	0.242937	1.13741	1.54267
ENSMUSG00000044864.16	Ankrd50	2444.96	-1.01429	0.16369	6.19641	5.7764e-10	1.10771e-08	0.0116851	-0.248717	-0.152381	-1.10449	-1.17189
ENSMUSG00000039236.18	Isg20	42.9588	3.17623	0.51299	-6.1916	5.95575e-10	1.14051e-08	-0.884595	-0.183879	-0.72677	2.58158	2.55556
ENSMUSG00000025555.14	Farp1	5184.03	-0.790968	0.127827	6.18782	6.10007e-10	1.16653e-08	0.0378725	-0.204472	-0.176943	-0.91904	-0.886751
ENSMUSG00000045348.16	Nyap1	228.065	-1.94692	0.314733	6.18593	6.17357e-10	1.17896e-08	-1.1663	-0.616268	-1.11658	-2.95182	-2.83163
ENSMUSG00000012848.15	Rps5	22960.4	0.811742	0.131307	-6.18203	6.32815e-10	1.20681e-08	-0.843359	-0.804042	-0.890475	-0.0649966	0.00439847
ENSMUSG00000042063.11	Zfp386	207.169	1.5649	0.253178	-6.18103	6.36828e-10	1.21278e-08	0.590908	0.315582	0.689655	1.91033	2.29361
ENSMUSG00000029334.14	Prkg2	242.652	1.73538	0.280854	-6.17892	6.45412e-10	1.22711e-08	-0.16721	-1.12523	-0.671709	0.873856	1.29729
ENSMUSG00000036943.9	Rab8b	347.94	1.34445	0.217592	-6.17875	6.46131e-10	1.22711e-08	-0.764306	-0.741961	-0.597203	0.647983	0.668591
ENSMUSG00000001833.17	Sept7	5649.93	1.23821	0.200449	-6.1772	6.52504e-10	1.23752e-08	1.31534	0.991138	1.45583	2.23493	2.82963
ENSMUSG00000028163.17	Nfkb1	1273.79	0.962306	0.155845	-6.17477	6.62581e-10	1.2549e-08	0.200155	-0.0359684	0.080601	1.08347	0.99775
ENSMUSG00000022844.8	Pdia5	1758.9	-0.77821	0.126134	6.16973	6.84055e-10	1.2938e-08	0.976544	0.771349	0.755493	0.0225555	0.0910165
ENSMUSG00000027276.7	Jag1	2581.84	-1.12805	0.182845	6.16943	6.85369e-10	1.29451e-08	2.56593	2.12449	2.44476	1.24436	1.2399
ENSMUSG00000022111.9	Uchl3	303.244	1.21644	0.197185	-6.16903	6.87084e-10	1.29598e-08	-0.291146	-0.414849	-0.33297	0.974767	0.761453
ENSMUSG00000031808.7	Slc27a1	422.087	-1.21985	0.197786	6.16755	6.93559e-10	1.30641e-08	0.119463	0.00494461	-0.135391	-1.23718	-1.16626
ENSMUSG00000000787.12	Ddx3x	6137.27	1.21142	0.196455	-6.16639	6.98655e-10	1.31421e-08	0.688914	0.296277	0.686298	1.60116	1.94748
ENSMUSG00000030759.16	Far1	1972.5	1.42343	0.230923	-6.16411	7.08786e-10	1.33146e-08	2.05296	1.60819	2.19083	3.12991	3.71827
ENSMUSG00000000325.16	Arvcf	338.709	-1.33649	0.216955	6.1602	7.26528e-10	1.36293e-08	-0.471768	-0.44841	-0.656451	-1.66009	-2.02264
ENSMUSG00000022464.14	Slc38a4	4815.69	-0.997407	0.161935	6.15931	7.3063e-10	1.36877e-08	1.66109	1.6248	1.71056	0.798555	0.571307
ENSMUSG00000025995.16	Wdr75	1803.31	0.881683	0.143229	-6.15574	7.47292e-10	1.39619e-08	0.976544	0.714155	1.12954	1.83782	1.82676
ENSMUSG00000058056.16	Palld	16356.7	-1.02109	0.165871	6.15592	7.46429e-10	1.39619e-08	0.818098	0.771853	0.833977	-0.294657	-0.127139
ENSMUSG00000027115.14	Kif18a	208.445	1.99722	0.324487	-6.15501	7.50719e-10	1.4007e-08	1.78991	1.75136	2.40097	4.08049	3.90851
ENSMUSG00000047557.2	Lxn	1187.33	0.913212	0.148467	-6.15092	7.70333e-10	1.43536e-08	0.492558	0.362847	0.450039	1.44852	1.25036
ENSMUSG00000026933.17	Camsap1	1015.7	-1.05457	0.171469	6.15022	7.73772e-10	1.43982e-08	-0.645518	-0.857749	-0.884207	-1.82213	-1.87178
ENSMUSG00000027171.10	Prrg4	400.389	-1.35214	0.220283	6.13819	8.34644e-10	1.551e-08	0.986005	0.787444	1.12556	-0.477463	-0.265631
ENSMUSG00000027646.15	Src	1838.52	-0.91402	0.148933	6.13712	8.40297e-10	1.55941e-08	-1.06994	-0.989763	-1.06413	-2.03247	-1.86166
ENSMUSG00000032323.13	Cyp11a1	46.294	3.95835	0.645483	-6.13238	8.65723e-10	1.60444e-08	1.56175	-1.27343	0.142895	3.97507	4.46242
ENSMUSG00000031563.8	Wwc2	2821.08	-0.955869	0.155965	6.12873	8.85855e-10	1.63955e-08	-0.0591464	-0.332174	-0.231389	-1.24493	-1.08132
ENSMUSG00000079555.2	Haus3	373.246	1.49218	0.243504	-6.12794	8.90241e-10	1.64546e-08	1.65192	1.24574	1.99079	3.12585	3.15644
ENSMUSG00000021876.15	Rnase4	1359.63	1.05603	0.172471	-6.12295	9.18584e-10	1.69331e-08	1.44705	1.09012	1.55218	2.49751	2.35756
ENSMUSG00000028029.11	Aimp1	1744.24	0.820017	0.133924	-6.12299	9.18352e-10	1.69331e-08	0.144955	0.364616	0.218757	1.1439	0.987121
ENSMUSG00000025510.14	Cd151	3314.47	-0.869891	0.142208	6.11705	9.53242e-10	1.75485e-08	-0.145758	0.151018	-0.0381961	-0.9569	-0.793663
ENSMUSG00000055172.10	C1ra	56.8006	2.92701	0.478529	-6.11668	9.55475e-10	1.75662e-08	0.942412	0.00667639	0.198412	3.31302	3.0341
ENSMUSG00000024993.15	Fam45a	662.792	1.25644	0.205479	-6.11469	9.67437e-10	1.77625e-08	0.823549	0.583183	1.14876	1.90421	2.38756
ENSMUSG00000030084.11	Plxna1	5256.33	-0.955227	0.156245	6.11365	9.73776e-10	1.78551e-08	0.266835	-0.0772189	0.0694329	-0.766746	-0.972507
ENSMUSG00000027550.14	Lrrcc1	270.205	1.73995	0.284634	-6.11293	9.78201e-10	1.79125e-08	1.65092	1.00053	1.79624	3.04175	3.50607
ENSMUSG00000032397.7	Tipin	463.158	1.29182	0.211377	-6.11142	9.87461e-10	1.80581e-08	-0.0578742	-0.385105	0.0244922	1.05721	1.26584
ENSMUSG00000025962.15	Fastkd2	319.329	1.53123	0.250845	-6.1043	1.03255e-09	1.88576e-08	0.564562	0.150544	0.850209	1.99133	2.15606
ENSMUSG00000015672.4	Mrpl32	652.103	0.986172	0.161603	-6.10244	1.04459e-09	1.90523e-08	0.414246	0.498467	0.338746	1.3847	1.41618
ENSMUSG00000036002.12	Fam214b	857.52	-1.23933	0.203131	6.10115	1.05305e-09	1.91561e-08	-2.41096	-1.86479	-2.22036	-3.39342	-3.40068
ENSMUSG00000004891.16	Nes	7987.95	-1.50512	0.246689	6.10131	1.052e-09	1.91561e-08	0.3391	0.214929	0.0109799	-1.59637	-1.05701
ENSMUSG00000036158.12	Prickle1	523.816	-1.01377	0.1662	6.09967	1.06286e-09	1.9309e-08	1.28323	1.12571	1.15306	0.179643	0.170332
ENSMUSG00000002718.14	Cse1l	3896.41	1.19718	0.196329	-6.09784	1.07514e-09	1.95066e-08	1.63263	1.095	1.56641	2.42704	2.87714
ENSMUSG00000020914.17	Top2a	4552.88	1.35805	0.222868	-6.09351	1.10462e-09	2.00152e-08	1.45234	0.771269	1.22173	2.39522	2.63649
ENSMUSG00000061559.15	Wdr61	1274.03	0.928138	0.152414	-6.08958	1.1321e-09	2.04862e-08	0.494144	0.757669	0.743716	1.73038	1.46478
ENSMUSG00000041671.13	Pyroxd1	180.676	1.85986	0.305534	-6.08724	1.14872e-09	2.07596e-08	2.08618	2.01886	2.00354	3.73218	4.08855
ENSMUSG00000009585.18	Apobec3	262.791	1.424	0.23403	-6.08468	1.16723e-09	2.10665e-08	0.635613	0.516167	0.439394	2.03139	1.8498
ENSMUSG00000022885.16	St6gal1	195.159	-1.65047	0.271458	6.08003	1.20162e-09	2.16589e-08	-1.34636	-1.4785	-1.22407	-2.73771	-3.28985
ENSMUSG00000022836.11	Mylk	990.392	0.983409	0.161807	-6.07768	1.21932e-09	2.19494e-08	-0.339752	-0.114886	-0.199597	0.946586	0.584582
ENSMUSG00000046079.16	Lrrc8d	916.84	-0.922425	0.1518	6.07657	1.2278e-09	2.20733e-08	0.609008	0.636252	0.634057	-0.234016	-0.33126
ENSMUSG00000056220.14	Pla2g4a	2399.44	1.28369	0.211275	-6.07591	1.23288e-09	2.21358e-08	1.30845	1.24839	1.39591	2.22793	3.08022
ENSMUSG00000003458.12	Ncstn	3457.79	-0.624883	0.10285	6.07565	1.23488e-09	2.21428e-08	1.28714	1.17778	1.21449	0.60587	0.607663
ENSMUSG00000013033.16	Adgrl1	754.201	-1.15805	0.19062	6.07519	1.23844e-09	2.21779e-08	-0.877496	-1.06023	-0.932872	-2.02414	-2.202
ENSMUSG00000020649.11	Rrm2	5246.47	0.737357	0.121388	-6.07437	1.24472e-09	2.22615e-08	0.158633	0.335678	0.328837	1.00859	1.0238
ENSMUSG00000029253.12	Cenpc1	414.688	1.17046	0.192723	-6.07329	1.25316e-09	2.23834e-08	1.09343	0.784466	1.26485	2.29706	2.15021
ENSMUSG00000025613.13	Cct8	9928.97	1.07041	0.176582	-6.06183	1.34583e-09	2.40076e-08	0.575352	0.587378	0.618848	1.44119	1.94845
ENSMUSG00000030116.14	Mfap5	336.056	1.22613	0.202338	-6.05979	1.36298e-09	2.42822e-08	0.0642345	0.284539	0.232703	1.58509	1.24166
ENSMUSG00000054717.7	Hmgb2	257.784	2.86222	0.472515	-6.05741	1.38333e-09	2.46129e-08	-6.21471	-6.36152	-6.04202	-2.82665	-4.03657
ENSMUSG00000052957.8	Gas1	274.307	1.62342	0.268016	-6.05717	1.38539e-09	2.46179e-08	0.623985	0.0248909	0.416972	2.01183	1.89918
ENSMUSG00000046865.7	Fbl	1645.26	1.27169	0.210136	-6.05175	1.43285e-09	2.54285e-08	-4.99875	-4.63578	-4.52166	-3.47291	-3.36694
ENSMUSG00000037958.13	Nsrp1	405.964	1.28778	0.212822	-6.05096	1.43982e-09	2.55173e-08	0.719205	0.66184	0.806172	1.85887	2.22826
ENSMUSG00000020836.15	Coro6	106.441	-2.29106	0.37864	6.05077	1.44155e-09	2.55173e-08	-0.216256	-0.137926	-0.213216	-2.96682	-2.12153
ENSMUSG00000036309.14	Skp1a	2475.52	0.936821	0.154905	-6.0477	1.46932e-09	2.59756e-08	-0.552471	-0.205176	-0.300665	0.674483	0.497152
ENSMUSG00000042606.9	Hirip3	278.2	1.28104	0.211847	-6.04698	1.47589e-09	2.60583e-08	0.255886	-0.0277296	-0.0191992	1.3503	1.31153
ENSMUSG00000033952.14	Aspm	488.075	2.04505	0.338229	-6.04635	1.48168e-09	2.61271e-08	2.8379	1.50723	2.37708	3.96384	4.60019
ENSMUSG00000050530.14	Fam171a1	1053.01	-0.993085	0.164443	6.0391	1.5498e-09	2.72935e-08	-0.214426	-0.679976	-0.513632	-1.51934	-1.40698
ENSMUSG00000028469.15	Npr2	631.47	-0.998562	0.165407	6.03701	1.56995e-09	2.7613e-08	0.689858	0.443894	0.521094	-0.440505	-0.444244
ENSMUSG00000061136.15	Prpf40a	2620.66	1.18487	0.196555	-6.02815	1.65843e-09	2.9104e-08	1.20563	0.815122	1.27493	2.02526	2.5872
ENSMUSG00000028896.13	Rcc1	1273.29	0.824	0.136693	-6.02811	1.65893e-09	2.9104e-08	-0.940235	-0.862356	-1.03904	-0.183786	-0.0514782
ENSMUSG00000039662.16	Icmt	1414.78	-1.10108	0.182671	6.02767	1.66337e-09	2.91449e-08	-1.86791	-1.5936	-1.8364	-3.07158	-2.66555
ENSMUSG00000040549.16	Ckap5	3230.58	1.3278	0.220396	-6.0246	1.69528e-09	2.96662e-08	2.03962	1.38504	1.70328	2.78888	3.30856
ENSMUSG00000024672.11	Ms4a7	122.216	2.49348	0.413973	-6.02328	1.70913e-09	2.98708e-08	1.58967	0.868658	0.9711	3.43995	3.80967
ENSMUSG00000019917.10	Sept10	476.943	1.13891	0.189155	-6.02106	1.7328e-09	3.02462e-08	1.1615	1.29374	1.46833	2.35464	2.57789
ENSMUSG00000026356.15	Dars	2401.89	0.850835	0.141381	-6.01804	1.76546e-09	3.07774e-08	1.09042	0.959339	1.22194	1.9591	1.9434
ENSMUSG00000019948.4	Actr6	193.724	1.7486	0.291058	-6.00774	1.8813e-09	3.27554e-08	0.989089	1.2834	1.55218	2.95715	3.11979
ENSMUSG00000021676.10	Iqgap2	311.149	1.7455	0.290589	-6.00676	1.89263e-09	3.29112e-08	1.64114	0.96757	1.26811	2.79757	3.30057
ENSMUSG00000068270.15	Shroom4	1052.74	-1.17923	0.196343	6.00599	1.90168e-09	3.3027e-08	1.45281	0.867713	1.19327	-0.066805	0.0267732
ENSMUSG00000024539.17	Ptpn2	559.622	1.31743	0.2194	-6.0047	1.91691e-09	3.32498e-08	1.29856	1.02319	1.21513	2.58626	2.39386
ENSMUSG00000025531.14	Chm	514.016	1.47168	0.245304	-5.99939	1.98058e-09	3.4311e-08	1.24942	1.06424	1.60112	2.54908	3.11591
ENSMUSG00000034687.8	Fras1	226.3	-1.73837	0.29008	5.99274	2.06329e-09	3.56991e-08	2.58398	2.11994	2.05987	0.751947	0.228464
ENSMUSG00000029169.11	Dhx15	4562.25	0.922809	0.154073	-5.98943	2.10572e-09	3.63876e-08	1.30993	0.933929	1.21814	1.97489	2.19651
ENSMUSG00000027091.14	Zc3h15	1013.63	1.20707	0.201621	-5.98682	2.13987e-09	3.69315e-08	-1.22621	-1.47078	-1.09595	-0.412646	0.316438
ENSMUSG00000027968.11	Larp7	508.995	1.06322	0.177667	-5.98434	2.17269e-09	3.74511e-08	-0.778555	-0.968736	-1.00956	0.240405	0.0438872
ENSMUSG00000032508.8	Myd88	531.392	1.19571	0.19986	-5.98274	2.19418e-09	3.77744e-08	-0.493875	-0.266319	-0.351048	0.848657	0.805615
ENSMUSG00000016319.3	Slc25a5	4743.22	0.811104	0.1356	-5.9816	2.20961e-09	3.79926e-08	-2.60081	-2.56166	-2.51169	-1.78618	-1.69892
ENSMUSG00000022790.14	Igsf11	46.343	-3.01144	0.503693	5.97873	2.24889e-09	3.862e-08	0.631073	1.52933	1.13964	-2.16779	-1.62396
ENSMUSG00000058291.14	Zfp68	253.602	1.64749	0.275909	-5.97113	2.35613e-09	4.04113e-08	0.952289	0.570913	1.15992	2.57527	2.54433
ENSMUSG00000037946.11	Fgd3	2765.89	-1.29985	0.217755	5.96935	2.38197e-09	4.08038e-08	-0.975039	-0.378544	-0.681201	-2.20909	-1.75122
ENSMUSG00000026605.14	Cenpf	815.085	1.24686	0.209064	-5.96402	2.46112e-09	4.21074e-08	2.69772	2.10088	2.31106	3.35058	3.93704
ENSMUSG00000029287.14	Tgfbr3	415.235	2.03005	0.340399	-5.96372	2.46552e-09	4.21306e-08	2.06568	0.387703	1.70359	3.4544	3.30809
ENSMUSG00000026836.15	Acvr1	1319.45	-0.87368	0.146525	5.96267	2.48143e-09	4.23219e-08	0.952543	0.7298	1.1587	0.0437377	0.118234
ENSMUSG00000026024.14	Als2	638.911	-0.925976	0.155298	5.96258	2.48285e-09	4.23219e-08	0.376203	0.0857517	0.320414	-0.618289	-0.695322
ENSMUSG00000029276.13	Glmn	144.64	2.13401	0.358073	-5.95972	2.5267e-09	4.30163e-08	1.76135	1.5156	1.43411	3.17697	4.43178
ENSMUSG00000060739.8	Nsa2	1151.86	1.27916	0.214821	-5.95454	2.60798e-09	4.43453e-08	-3.78008	-4.04932	-4.07646	-2.49557	-2.89697
ENSMUSG00000006010.14	Odr4	397.787	1.48149	0.249183	-5.94538	2.75818e-09	4.68415e-08	0.830568	0.604793	1.19561	2.10788	2.74847
ENSMUSG00000020024.7	Cep83	209.836	1.39194	0.234142	-5.94486	2.76696e-09	4.69329e-08	-0.262361	-0.813768	-0.306865	0.882086	1.00221
ENSMUSG00000055485.6	Soga1	1680.85	-1.02505	0.172526	5.94143	2.82541e-09	4.78656e-08	1.03881	0.932622	1.0256	-0.0276209	-0.0118065
ENSMUSG00000036854.14	Hspb6	508.568	1.34768	0.227	-5.93689	2.90483e-09	4.91163e-08	-0.480172	-0.81869	-1.09079	0.656661	0.416201
ENSMUSG00000059430.14	Actg2	34717.9	-0.883724	0.148855	5.9368	2.90635e-09	4.91163e-08	0.0924803	0.454257	0.240787	-0.7562	-0.481575
ENSMUSG00000067194.6	Eif1ax	1597.2	0.762494	0.12848	-5.93472	2.94341e-09	4.96818e-08	-0.71368	-0.76683	-0.490815	0.112591	0.115353
ENSMUSG00000015714.11	Cers2	2723.72	-0.700497	0.118077	5.93252	2.98313e-09	5.02907e-08	0.29715	0.304381	0.127901	-0.464472	-0.437527
ENSMUSG00000028161.17	Ppp3ca	1392.89	-0.85814	0.144675	5.93152	3.00144e-09	5.04953e-08	0.622516	0.494349	0.796107	-0.287987	-0.139188
ENSMUSG00000024777.10	Ppp2r5b	849.238	-0.986179	0.166262	5.93146	3.00258e-09	5.04953e-08	-1.95127	-2.07534	-2.0833	-3.14511	-2.89629
ENSMUSG00000042121.16	Ssh1	692.969	-1.06374	0.179391	5.92972	3.03443e-09	5.09069e-08	-0.428053	-0.645363	-0.702243	-1.49996	-1.78938
ENSMUSG00000056602.12	Fry	109.708	-1.99019	0.335622	5.92987	3.03183e-09	5.09069e-08	1.28446	0.756972	1.02704	-1.27306	-0.597104
ENSMUSG00000023456.15	Tpi1	6659.15	0.825178	0.13928	-5.92459	3.13083e-09	5.24605e-08	-1.81823	-1.77226	-1.99957	-1.0382	-1.03425
ENSMUSG00000041840.8	Haus1	242.832	1.57822	0.266515	-5.92169	3.1864e-09	5.33269e-08	0.316615	-0.189244	0.516404	1.70807	1.93702
ENSMUSG00000045664.5	Cdc42ep2	173.141	1.44468	0.244056	-5.91947	3.22972e-09	5.39864e-08	-0.479111	-0.67769	-0.286248	1.09632	0.840077
ENSMUSG00000049037.8	Clec4a1	37.9066	4.38615	0.741615	-5.91433	3.33236e-09	5.56348e-08	-0.7435	0.905902	-1.4156	3.55325	4.92513
ENSMUSG00000062210.13	Tnfaip8	266.263	1.38892	0.234863	-5.91376	3.34379e-09	5.57581e-08	0.383423	-0.0989397	0.431911	1.81666	1.43845
ENSMUSG00000067274.10	Rplp0	35032	0.750314	0.126935	-5.911	3.40034e-09	5.65645e-08	-4.21101	-4.03016	-4.26076	-3.40082	-3.42761
ENSMUSG00000016918.15	Sulf1	3050.35	-1.01998	0.172551	5.91119	3.39639e-09	5.65645e-08	1.88189	1.32442	1.69592	0.708412	0.504474
ENSMUSG00000024097.11	Srsf7	2276.1	0.759475	0.128521	-5.90933	3.43505e-09	5.70731e-08	0.245508	0.113478	0.214619	1.02663	0.885731
ENSMUSG00000056091.12	St3gal5	613.058	-1.10534	0.187105	5.90757	3.47185e-09	5.76151e-08	-0.0114264	0.301889	0.175405	-0.798151	-1.06564
ENSMUSG00000058881.13	Zfp516	713.749	-1.00529	0.170181	5.90721	3.47959e-09	5.76743e-08	0.800465	0.576195	0.699266	-0.215714	-0.397792
ENSMUSG00000002602.16	Axl	14205.4	-0.706702	0.119789	5.89956	3.64466e-09	6.0338e-08	-0.317068	-0.314525	-0.428326	-1.07125	-1.02886
ENSMUSG00000070407.5	Hs3st3b1	185.837	-2.10164	0.356279	5.89885	3.66037e-09	6.05254e-08	-1.51007	-1.51282	-1.48207	-3.19516	-4.00793
ENSMUSG00000026235.14	Epha4	1031.26	-1.30379	0.221216	5.89374	3.77544e-09	6.23535e-08	1.89549	1.87595	2.03679	0.61417	0.671085
ENSMUSG00000074182.8	Znhit6	666.459	0.96623	0.16399	-5.892	3.8156e-09	6.29414e-08	0.231242	0.102046	0.256074	1.09863	1.24298
ENSMUSG00000031201.17	Brcc3	319.284	1.63845	0.278521	-5.88266	4.03722e-09	6.65179e-08	1.10781	1.08265	1.40368	2.55539	3.22073
ENSMUSG00000045573.9	Penk	331.359	4.19095	0.71246	-5.88237	4.0443e-09	6.65551e-08	0.820905	0.670188	0.771684	4.86043	5.14555
ENSMUSG00000041688.16	Amot	1814.77	-1.35881	0.231053	5.88093	4.0796e-09	6.7056e-08	1.20618	1.47122	1.28978	-0.199089	0.157609
ENSMUSG00000020530.14	Ggnbp2	1280.54	0.873458	0.148548	-5.87996	4.10373e-09	6.73724e-08	0.874824	0.830733	1.15165	1.84798	1.82288
ENSMUSG00000022964.14	Tmem50b	434.345	-1.14779	0.195347	5.87565	4.21181e-09	6.90647e-08	-0.37151	-0.613117	-0.324248	-1.6049	-1.55454
ENSMUSG00000078974.10	Sec61g	725.936	1.49616	0.254647	-5.87543	4.21739e-09	6.90741e-08	-4.5505	-4.82146	-4.75151	-2.81376	-3.61219
ENSMUSG00000040331.16	Nsmce4a	596.448	0.973848	0.165769	-5.87472	4.23565e-09	6.9291e-08	0.00702524	-0.154467	-0.131445	0.977651	0.784723
ENSMUSG00000021660.14	Btf3	4074.5	0.955971	0.162741	-5.87417	4.24966e-09	6.94096e-08	-2.34636	-2.39374	-2.14618	-1.24034	-1.41213
ENSMUSG00000024661.7	Fth1	7222.34	0.955739	0.162706	-5.87404	4.25295e-09	6.94096e-08	-3.90138	-3.44961	-3.71212	-2.63115	-2.80999
ENSMUSG00000020463.15	Ppp4r3b	623.811	1.36703	0.232744	-5.87354	4.26574e-09	6.94541e-08	1.49582	0.924917	1.57427	2.52991	2.91844
ENSMUSG00000028289.12	Epha7	287.516	-1.46099	0.248735	5.87368	4.26222e-09	6.94541e-08	2.13729	2.3651	2.21278	0.778282	0.842655
ENSMUSG00000028187.10	Rpf1	579.665	1.11594	0.190029	-5.87245	4.29403e-09	6.98324e-08	1.54052	0.987799	1.36384	2.56778	2.26819
ENSMUSG00000042644.9	Itpr3	2426.02	-1.12404	0.191427	5.87189	4.3085e-09	6.99853e-08	0.487029	0.397246	0.249893	-0.85704	-0.618151
ENSMUSG00000040152.8	Thbs1	208050	-1.10185	0.187677	5.871	4.33177e-09	7.02805e-08	2.49424	2.11613	2.27411	1.19075	1.18608
ENSMUSG00000024427.7	Spry4	725.276	-1.02665	0.175099	5.86328	4.53818e-09	7.3543e-08	0.0164049	0.250624	0.273157	-0.959382	-0.705493
ENSMUSG00000034218.16	Atm	448.31	1.7855	0.304767	-5.85858	4.6685e-09	7.55662e-08	2.20428	1.39414	2.28609	3.39781	4.28124
ENSMUSG00000022205.15	Sub1	1819.73	0.890408	0.152017	-5.85728	4.70502e-09	7.60682e-08	-0.104075	0.0290835	0.235394	0.98325	0.920338
ENSMUSG00000006219.12	Fblim1	2318.79	-0.963674	0.164617	5.85405	4.79758e-09	7.74739e-08	-0.532041	-0.410699	-0.607083	-1.5707	-1.37617
ENSMUSG00000037034.16	Pax1	105.269	-2.10546	0.359814	5.85152	4.87092e-09	7.85663e-08	-0.699614	-1.08129	-1.07566	-2.97066	-3.10673
ENSMUSG00000043241.14	Upf2	608.186	1.4587	0.249405	-5.84873	4.95331e-09	7.9802e-08	1.33252	0.770925	1.37095	2.33337	2.99988
ENSMUSG00000020130.9	Tbc1d15	1286.99	1.09766	0.187702	-5.84789	4.97857e-09	8.01156e-08	1.19718	0.867087	1.29796	2.09917	2.38841
ENSMUSG00000002732.14	Fkbp7	529.935	1.1815	0.202163	-5.84428	5.08762e-09	8.1775e-08	1.41653	1.3199	1.32504	2.55549	2.49509
ENSMUSG00000029552.19	Tes	4396.64	-0.945131	0.161737	5.84362	5.10799e-09	8.20069e-08	0.0487103	0.306494	0.34158	-0.873696	-0.563382
ENSMUSG00000049907.8	Rasl11b	425.14	-1.31846	0.225797	5.83912	5.24761e-09	8.41507e-08	0.466712	0.620019	0.397911	-0.80618	-0.7855
ENSMUSG00000036499.9	Eea1	839.91	1.27613	0.21856	-5.83879	5.25798e-09	8.42192e-08	1.7062	0.940025	1.63744	2.54939	2.86803
ENSMUSG00000038146.8	Notch3	657.149	-1.19179	0.204334	5.83258	5.45762e-09	8.73155e-08	1.33179	1.14489	1.07617	0.215988	-0.224849
ENSMUSG00000036565.7	Ttyh3	2242.53	-0.859865	0.147441	5.83194	5.47874e-09	8.75521e-08	-1.28934	-1.53189	-1.5969	-2.32044	-2.33612
ENSMUSG00000022361.14	Zhx1	199.974	1.46724	0.251766	-5.82777	5.61721e-09	8.9661e-08	0.366831	0.458364	0.395669	1.64668	2.20047
ENSMUSG00000009630.10	Ppp2cb	2252.83	-0.678416	0.116456	5.82553	5.69316e-09	9.07684e-08	0.472097	0.336369	0.561307	-0.257643	-0.169237
ENSMUSG00000030744.13	Rps3	25734.2	0.850802	0.146115	-5.82284	5.78565e-09	9.21367e-08	-1.55072	-1.24142	-1.52109	-0.639336	-0.53685
ENSMUSG00000046727.13	Cystm1	226.949	-1.69248	0.290707	5.82195	5.81664e-09	9.25235e-08	-0.294379	0.480517	0.163052	-1.41314	-1.70193
ENSMUSG00000018425.18	Dhx40	570.598	1.20924	0.207806	-5.81909	5.91694e-09	9.40106e-08	0.258709	0.0588378	0.633705	1.66534	1.39178
ENSMUSG00000021518.4	Ptdss1	1022.78	-0.894775	0.153825	5.81685	5.99681e-09	9.517e-08	-0.756662	-0.622713	-0.791555	-1.5851	-1.62593
ENSMUSG00000066232.4	Ipo7	6675.76	1.33938	0.230345	-5.81466	6.07571e-09	9.63115e-08	1.97488	1.32624	1.86539	2.7473	3.42879
ENSMUSG00000036572.16	Upf3b	213.854	1.35487	0.233068	-5.8132	6.12905e-09	9.70456e-08	0.737104	0.648079	0.710323	1.94139	2.18296
ENSMUSG00000063234.5	Gpr84	49.253	4.31008	0.741458	-5.81298	6.13694e-09	9.70592e-08	1.96906	1.15624	1.30377	6.46668	4.8758
ENSMUSG00000059401.14	Mamld1	173.209	-1.47227	0.253439	5.80916	6.27867e-09	9.91872e-08	1.16117	0.695109	0.600848	-0.648913	-0.6403
ENSMUSG00000022698.17	Naa50	2006.47	1.02543	0.176567	-5.80763	6.33629e-09	9.99831e-08	0.579655	0.11425	0.678068	1.34555	1.65846
ENSMUSG00000058793.14	Cds2	1444.22	-0.925396	0.159369	5.80662	6.37462e-09	1.00473e-07	-0.491055	-0.168332	-0.107305	-1.19312	-1.15486
ENSMUSG00000036817.14	Sun1	1271.26	-0.742701	0.127913	5.80629	6.38705e-09	1.00554e-07	0.886398	0.76527	0.940982	0.134909	0.118645
ENSMUSG00000031696.9	Vps35	4737.34	1.10295	0.190016	-5.80448	6.45659e-09	1.01533e-07	0.856311	0.777261	1.15257	1.82515	2.30193
ENSMUSG00000015468.14	Notch4	39.9526	-2.98695	0.514657	5.80377	6.48409e-09	1.0185e-07	1.30168	0.803738	1.54664	-2.22916	-1.35025
ENSMUSG00000031095.15	Cul4b	1928.21	1.05703	0.182178	-5.80217	6.54619e-09	1.02708e-07	1.49677	1.36974	1.73225	2.41654	2.83231
ENSMUSG00000038872.10	Zfhx3	1456.29	-1.44553	0.249162	5.80158	6.56936e-09	1.02955e-07	1.07955	0.311066	0.718729	-0.799269	-0.745375
ENSMUSG00000029212.11	Gabrb1	104.577	-1.90296	0.328083	5.80024	6.62195e-09	1.03661e-07	0.676299	0.618639	1.00268	-1.39727	-0.862709
ENSMUSG00000029209.15	Gnpda2	294.043	1.44199	0.248709	-5.79791	6.71471e-09	1.04994e-07	1.51871	1.77385	1.56799	2.91096	3.21931
ENSMUSG00000025666.16	Tmem47	527.478	1.10987	0.19145	-5.79718	6.74377e-09	1.05329e-07	0.80916	0.864139	0.961054	1.88209	2.13521
ENSMUSG00000037286.15	Stag1	731.019	1.50378	0.259473	-5.79554	6.81029e-09	1.06248e-07	1.02701	0.461401	1.25343	2.19136	2.76136
ENSMUSG00000018848.4	Rars	5615.09	0.700815	0.120946	-5.79444	6.8549e-09	1.06823e-07	0.685865	0.57162	0.634996	1.27256	1.40129
ENSMUSG00000042124.5	Lce1f	47.803	-4.88312	0.843322	5.79034	7.0246e-09	1.09345e-07	-1.1823	-1.20548	-0.431547	#NAME?	-4.77355
ENSMUSG00000025161.16	Slc16a3	971.718	1.45755	0.251767	-5.7893	7.06785e-09	1.09894e-07	0.362482	-0.357898	-0.249795	1.03228	1.74385
ENSMUSG00000037544.14	Dlgap5	936.977	0.794558	0.137256	-5.7889	7.08509e-09	1.09914e-07	1.02215	0.7913	0.899849	1.74037	1.65632
ENSMUSG00000023087.15	Noct	1550.4	-0.985759	0.17028	5.78906	7.07825e-09	1.09914e-07	0.725401	0.85927	0.93622	-0.114673	-0.151209
ENSMUSG00000009907.17	Vps4b	874.723	0.869158	0.150169	-5.78785	7.12946e-09	1.10479e-07	0.391577	0.259098	0.594652	1.22177	1.3766
ENSMUSG00000039782.15	Cpeb2	415.684	-1.37762	0.238041	5.78732	7.15162e-09	1.10698e-07	0.927351	1.16406	1.12861	-0.267054	-0.284723
ENSMUSG00000032336.17	Nptn	4462.03	-0.608186	0.105144	5.7843	7.28168e-09	1.12585e-07	1.13082	0.964035	1.19314	0.478465	0.512999
ENSMUSG00000029614.13	Rpl6	10338.1	0.969273	0.167646	-5.78168	7.39602e-09	1.14112e-07	-4.10249	-3.96562	-4.33165	-2.98879	-3.3317
ENSMUSG00000054720.12	Lrrc8c	2182.49	-1.09705	0.189747	5.78165	7.39698e-09	1.14112e-07	1.03338	0.511988	0.882328	-0.400931	-0.191039
ENSMUSG00000017697.3	Ada	283.396	1.40493	0.243069	-5.77995	7.47209e-09	1.15142e-07	-0.701953	-0.238893	-0.373252	1.05881	0.85806
ENSMUSG00000056648.5	Hoxb8	189.105	-1.87635	0.3247	5.77871	7.52748e-09	1.15866e-07	-1.12406	-0.98664	-1.12101	-2.56748	-3.36828
ENSMUSG00000001661.5	Hoxc6	540.787	-1.38513	0.239732	5.77783	7.56704e-09	1.16345e-07	0.223346	0.0228761	0.2515	-1.00908	-1.3998
ENSMUSG00000039934.12	Gsap	38.5889	2.94692	0.510324	-5.7746	7.71351e-09	1.18465e-07	-0.344027	-1.10009	-0.641861	2.48411	2.0314
ENSMUSG00000073489.6	Ifi204	172.312	5.87734	1.01915	-5.76692	8.0732e-09	1.23852e-07	0.2565	1.22783	0.905867	6.33956	7.05884
ENSMUSG00000020105.9	Lrig3	1086.51	-0.990061	0.171884	5.76004	8.40929e-09	1.28865e-07	1.43417	1.2252	1.44383	0.442508	0.327185
ENSMUSG00000029641.8	Rasl11a	133.528	1.64944	0.28641	-5.75903	8.45987e-09	1.29496e-07	0.5377	0.729916	0.661726	2.57029	2.00191
ENSMUSG00000038463.8	Olfml2b	2415.58	-0.985507	0.171173	5.75736	8.54398e-09	1.30639e-07	1.71053	1.16403	1.4647	0.601882	0.312786
ENSMUSG00000031490.6	Eif4ebp1	2624.77	0.691644	0.120194	-5.75442	8.69405e-09	1.32786e-07	-1.55085	-1.72682	-1.76488	-1.00908	-0.955593
ENSMUSG00000026761.12	Orc4	1066.41	1.07842	0.187555	-5.74989	8.93041e-09	1.36152e-07	1.23646	1.17943	1.65404	2.33694	2.5709
ENSMUSG00000052396.7	Mogat2	500.602	-2.00822	0.349267	5.74981	8.93414e-09	1.36152e-07	-0.720938	0.443952	-0.305079	-2.35705	-2.04723
ENSMUSG00000022425.16	Enpp2	82.8199	3.07	0.534057	-5.74845	9.00669e-09	1.37106e-07	1.50219	1.953	1.85918	4.91194	4.92933
ENSMUSG00000045539.3	Sprr3	79.5428	-2.84528	0.495085	5.74706	9.0807e-09	1.38081e-07	0.983753	1.28488	1.09062	-1.57285	-2.00399
ENSMUSG00000021932.13	Rnaseh2b	336.18	1.14164	0.198662	-5.74666	9.10254e-09	1.38261e-07	0.489561	0.453877	0.695806	1.71831	1.66896
ENSMUSG00000034640.9	Tiparp	424.177	1.34354	0.233843	-5.7455	9.16501e-09	1.39056e-07	1.0387	0.96955	1.5684	2.47497	2.6686
ENSMUSG00000032855.6	Pkd1	1963.44	-0.99939	0.174028	5.7427	9.31786e-09	1.4122e-07	0.166023	-0.0747149	0.128369	-0.750974	-1.09886
ENSMUSG00000027111.16	Itga6	918.894	-1.06487	0.185449	5.74211	9.35013e-09	1.41554e-07	1.52966	1.02921	1.41222	0.239642	0.257278
ENSMUSG00000040359.14	Ufl1	480.655	1.13815	0.198217	-5.74192	9.36089e-09	1.41562e-07	1.54337	1.12788	1.54434	2.38864	2.74931
ENSMUSG00000019832.5	Rab32	337.675	1.16387	0.202722	-5.74123	9.3991e-09	1.41984e-07	-0.729666	-0.344243	-0.237806	0.817857	0.649953
ENSMUSG00000021713.9	Ppwd1	257.383	1.589	0.276935	-5.73782	9.59027e-09	1.44714e-07	1.72052	1.37624	2.0413	3.09742	3.62706
ENSMUSG00000057123.14	Gja5	96.6375	-2.37185	0.413527	5.73565	9.71368e-09	1.46416e-07	0.746688	0.961653	0.867421	-1.93754	-0.999329
ENSMUSG00000025245.14	Lztfl1	119.226	1.69418	0.295456	-5.73413	9.80121e-09	1.47571e-07	-0.25598	-0.288528	0.20391	1.48314	1.71963
ENSMUSG00000004267.16	Eno2	185.335	-1.55021	0.270356	5.73395	9.81168e-09	1.47571e-07	-0.831117	-0.640304	-0.36484	-2.1971	-2.08034
ENSMUSG00000007411.16	Mark3	1543.26	-0.803262	0.140114	5.73293	9.87103e-09	1.48302e-07	-0.0208729	-0.316443	0.11931	-0.89922	-0.834976
ENSMUSG00000069910.2	Spdl1	398.424	1.19802	0.209099	-5.72944	1.0076e-08	1.51217e-07	1.35102	0.934243	1.30118	2.45991	2.33368
ENSMUSG00000021712.15	Trim23	414.838	1.41482	0.246982	-5.72843	1.01366e-08	1.51961e-07	1.81944	1.38956	2.02424	3.05666	3.34048
ENSMUSG00000067212.8	H2-T23	71.1947	2.45501	0.428724	-5.72631	1.02637e-08	1.53699e-07	-1.53022	-0.211067	-0.199407	2.00109	1.85133
ENSMUSG00000069516.8	Lyz2	1906.16	1.48784	0.259962	-5.72329	1.04483e-08	1.56295e-07	-0.233815	-0.620316	-0.380582	1.0712	1.10318
ENSMUSG00000032551.7	1110059G10Rik	166.574	1.49782	0.261885	-5.71939	1.06907e-08	1.59425e-07	0.901838	0.725481	0.765978	2.42162	2.13436
ENSMUSG00000024528.8	Srfbp1	592.769	0.845973	0.14791	-5.71952	1.06823e-08	1.59425e-07	0.766588	0.699691	0.740695	1.58608	1.58533
ENSMUSG00000022265.7	Ank	961.974	-1.11929	0.195701	5.71937	1.06922e-08	1.59425e-07	-0.0281264	-0.589378	-0.305129	-1.65066	-1.22755
ENSMUSG00000000340.10	Dbt	377.196	1.1401	0.199454	-5.71609	1.09004e-08	1.62354e-07	1.4073	1.11882	1.25955	2.53508	2.26932
ENSMUSG00000024829.12	Mrpl21	519.811	0.983788	0.172201	-5.71303	1.10985e-08	1.65126e-07	-1.13056	-0.897215	-0.835052	0.0847228	-0.0142687
ENSMUSG00000032320.7	Rcn2	3102.95	-0.809471	0.141712	5.71207	1.11607e-08	1.65873e-07	0.940385	1.11078	1.28312	0.322899	0.299376
ENSMUSG00000075700.9	Selenot	1345.16	0.827309	0.144883	-5.7102	1.12841e-08	1.67526e-07	-0.583817	-0.590502	-0.389303	0.303487	0.328252
ENSMUSG00000054428.12	Atpif1	1379.27	1.1483	0.201125	-5.70941	1.13372e-08	1.67953e-07	-0.0574462	0.187111	-0.420924	1.17911	0.937357
ENSMUSG00000024477.4	Pggt1b	452.032	1.08624	0.190249	-5.70958	1.13254e-08	1.67953e-07	0.7703	0.54025	0.879883	1.79578	1.85255
ENSMUSG00000060803.6	Gstp1	1022.91	0.826128	0.144703	-5.70914	1.13547e-08	1.68032e-07	-1.65202	-1.56006	-1.61629	-0.758749	-0.802312
ENSMUSG00000027220.2	Syt13	493.14	1.64478	0.288318	-5.70474	1.16518e-08	1.72061e-07	-0.578931	-0.756823	-0.887539	0.898553	0.853294
ENSMUSG00000037820.15	Tgm2	2003.85	-1.23607	0.216672	5.7048	1.16482e-08	1.72061e-07	-0.496935	0.249527	-0.33696	-1.56098	-1.27097
ENSMUSG00000068039.13	Tcp1	10294.2	0.568473	0.0996634	-5.70393	1.17078e-08	1.72702e-07	0.428558	0.434329	0.575745	1.05639	1.0544
ENSMUSG00000021702.7	Thbs4	360.377	2.00613	0.35187	-5.70134	1.18866e-08	1.74966e-07	1.85193	1.30613	0.86709	2.98261	3.49961
ENSMUSG00000031093.14	Dock11	611.265	1.44981	0.25429	-5.70142	1.18812e-08	1.74966e-07	2.17966	1.31017	1.85548	3.11063	3.31392
ENSMUSG00000025794.9	Rpl14	8238.61	0.879652	0.154513	-5.69308	1.24767e-08	1.83457e-07	-2.66376	-2.28372	-2.70867	-1.59059	-1.7497
ENSMUSG00000027423.15	Snx5	2471.1	0.922802	0.162106	-5.69258	1.2513e-08	1.83795e-07	0.47545	0.220207	0.772257	1.43476	1.41928
ENSMUSG00000004568.13	Arhgef18	1063.52	-0.999852	0.175676	5.69147	1.25952e-08	1.84806e-07	-0.0422963	0.163532	0.0169526	-0.96262	-0.915604
ENSMUSG00000025040.13	Fundc1	295.908	1.2294	0.216083	-5.68948	1.27423e-08	1.86766e-07	0.184272	-0.122635	0.204066	1.23361	1.4556
ENSMUSG00000028175.15	Depdc1a	81.0652	2.32152	0.408129	-5.68819	1.28391e-08	1.87984e-07	-1.45981	-1.78642	-1.1328	0.901976	0.859377
ENSMUSG00000019122.8	Ccl9	137.453	2.20301	0.387608	-5.68362	1.31876e-08	1.92882e-07	-0.148686	-0.300078	0.187452	2.16105	2.10623
ENSMUSG00000026748.13	Plxdc2	2047.01	-1.12703	0.198346	5.68216	1.33008e-08	1.94332e-07	1.80248	1.25983	1.64617	0.562543	0.308877
ENSMUSG00000044018.3	Mrpl50	626.702	0.894342	0.157453	-5.68007	1.34636e-08	1.96503e-07	0.647221	0.865573	0.790664	1.67216	1.66399
ENSMUSG00000022034.10	Esco2	167.486	2.09636	0.369198	-5.67814	1.36169e-08	1.98531e-07	2.46013	1.69111	2.60394	4.6215	4.01212
ENSMUSG00000021764.8	Ndufs4	1198.67	1.13531	0.199958	-5.67773	1.36497e-08	1.98798e-07	0.396195	0.580837	0.638477	1.97555	1.42574
ENSMUSG00000006333.14	Rps9	14943.1	0.979629	0.172638	-5.67447	1.39117e-08	2.02402e-07	-2.24788	-2.09398	-2.62518	-1.39233	-1.27993
ENSMUSG00000041133.11	Smc1a	1822.16	1.10987	0.195658	-5.67252	1.40708e-08	2.04501e-07	0.941578	0.385042	0.676524	1.58401	1.98515
ENSMUSG00000061477.4	Rps7	9646.25	1.07217	0.189089	-5.67018	1.42651e-08	2.07107e-07	-6.56898	-6.2584	-6.41446	-5.19138	-5.49603
ENSMUSG00000021715.12	Cwc27	226.996	1.24914	0.220364	-5.66852	1.4404e-08	2.08904e-07	0.83265	0.591024	0.773516	2.03003	1.91514
ENSMUSG00000020407.13	Upp1	65.7885	2.12608	0.375098	-5.66807	1.44414e-08	2.09007e-07	-0.55317	-0.450592	-0.151982	1.79277	1.72934
ENSMUSG00000021998.16	Lcp1	402.872	1.93036	0.340562	-5.66816	1.44339e-08	2.09007e-07	-0.175742	-0.983622	-0.665611	1.17657	1.53709
ENSMUSG00000030790.15	Adm	1277.88	1.00371	0.17709	-5.6678	1.44645e-08	2.09121e-07	1.08513	1.63865	1.53767	2.56166	2.29876
ENSMUSG00000020700.11	Map3k3	913.861	-0.867132	0.153031	5.66637	1.45853e-08	2.10647e-07	-1.66377	-1.70398	-1.84377	-2.59529	-2.59547
ENSMUSG00000027030.15	Stk39	874.851	-0.765867	0.135194	5.66494	1.47076e-08	2.12192e-07	0.0855141	0.0436863	0.131757	-0.637749	-0.699831
ENSMUSG00000029430.13	Ran	7413.93	0.756617	0.133587	-5.66385	1.48015e-08	2.13324e-07	-2.2931	-2.18947	-2.19391	-1.46197	-1.46805
ENSMUSG00000021639.17	Gtf2h2	399.384	1.07471	0.189811	-5.66199	1.49626e-08	2.15421e-07	1.04491	0.832331	1.11252	2.062	2.08721
ENSMUSG00000038335.13	Tsr1	1646.98	0.713071	0.126017	-5.65851	1.52693e-08	2.19608e-07	1.06822	0.826516	1.10738	1.68606	1.75665
ENSMUSG00000003970.9	Rpl8	30596	0.774898	0.136952	-5.65815	1.5301e-08	2.19835e-07	-1.11267	-0.973624	-1.29191	-0.424348	-0.274441
ENSMUSG00000038648.5	Creb3l2	2119.36	-0.83166	0.146989	5.65796	1.53182e-08	2.19853e-07	0.444796	0.103419	0.311886	-0.56808	-0.521547
ENSMUSG00000029836.15	Cbx3	447.307	1.29825	0.229573	-5.65506	1.55791e-08	2.23365e-07	-1.86432	-2.41249	-1.64707	-0.793188	-0.505674
ENSMUSG00000057841.5	Rpl32	10761.8	0.833525	0.147446	-5.6531	1.57579e-08	2.25694e-07	-3.8635	-3.82129	-3.95563	-3.07477	-3.01765
ENSMUSG00000006930.15	Hap1	30.1575	3.61024	0.63867	-5.65275	1.579e-08	2.2592e-07	-2.2807	-1.02287	-1.58758	2.46189	1.6024
ENSMUSG00000026039.9	Sgo2a	380.725	1.59994	0.283091	-5.65169	1.58879e-08	2.27085e-07	3.74369	3.31374	3.71097	5.01609	5.39397
ENSMUSG00000006360.11	Crip1	298.007	1.78955	0.316945	-5.64626	1.63975e-08	2.34126e-07	1.42812	0.6149	0.891211	3.04168	2.49284
ENSMUSG00000049323.8	Smcr8	809.127	-0.91028	0.161271	5.64441	1.65747e-08	2.36412e-07	0.389832	0.150022	0.382274	-0.644773	-0.552678
ENSMUSG00000029705.17	Cux1	2211.4	-0.821883	0.145629	5.64368	1.66452e-08	2.37173e-07	0.0696548	-0.0749652	-0.0205184	-0.832109	-0.816495
ENSMUSG00000025747.12	Tyms	891.127	0.989436	0.175382	-5.64161	1.68463e-08	2.39357e-07	-0.471445	-0.525762	-0.533088	0.5197	0.443895
ENSMUSG00000050812.18	Ecpas	2130.31	0.876365	0.155341	-5.64157	1.68505e-08	2.39357e-07	1.18714	0.915279	1.27542	1.90847	2.13072
ENSMUSG00000030257.16	Srgap3	248.468	-1.41041	0.249995	5.64175	1.68331e-08	2.39357e-07	-0.226249	-0.878269	-0.487927	-2.00359	-1.90309
ENSMUSG00000037379.7	Spon2	348.317	-1.85273	0.328484	5.64026	1.69795e-08	2.40941e-07	0.0923068	1.20303	0.435221	-1.10506	-1.36472
ENSMUSG00000021823.10	Vcl	17690.5	-0.841903	0.149329	5.63792	1.72117e-08	2.43986e-07	2.27807	2.06475	2.15004	1.26407	1.38387
[truncated: 12,833 more rows]

## Sheet: TE_Upf2
gene_id	external_gene_name	baseMean	log2FoldChange	lfcSE	stat	pvalue	padj	log2_Cre_control_fibro_Upf2_batch_1_TE	log2_Cre_control_fibro_Upf2_batch_2_TE	log2_Cre_control_fibro_Upf2_batch_3_TE	log2_Upf2_fibro_1_TE	log2_Upf2_fibro_2_TE	log2_Upf2_fibro_3_TE
[truncated: 13,277 more rows]
