# Supplementary material for: Defects in translation-dependent quality control pathways lead to convergent molecular and neurodevelopmental pathology
Source: eLife. 2021 Apr 26;10:e66904. doi: 10.7554/eLife.66904 (PMC8075583; doi:10.7554/eLife.66904)
Supplement: Supplementary file 7. [file elife-66904-supp7.xlsx]

## Sheet: DE mRNA Hbs1l (transcript level
transcript_id	ens_gene	ext_gene	transcript_biotype	pval	qval	b	se_b	mean_obs	var_obs	tech_var	sigma_sq	smooth_sigma_sq	final_sigma_sq	Cre_control_fibro_1_RNA	Cre_control_fibro_2_RNA	Cre_control_fibro_3_RNA	Hbs1l_fibro_1_RNA	Hbs1l_fibro_2_RNA	Hbs1l_fibro_3_RNA
ENSMUST00000040576.9	ENSMUSG00000034981	Parm1	protein_coding	6.85453e-60	3.23767e-55	-1.61631	0.0990252	6.48105	0.790435	0.00240585	0.00595994	0.0123031	0.0123031	9.22302	8.65114	7.39	1.58424	1.81556	1.54888
ENSMUST00000073211.12	ENSMUSG00000024049	Myom1	protein_coding	1.25945e-45	2.97444e-41	-1.48021	0.104404	6.37709	0.669929	0.00342132	0.0123596	0.012929	0.012929	5.71885	6.1478	5.95382	1.48343	1.09359	1.45736
ENSMUST00000032198.10	ENSMUSG00000030107	Usp18	protein_coding	1.10354e-40	1.73749e-36	3.19511	0.23924	5.03787	3.1313	0.0277912	0.0580621	0.0274925	0.0580621	0.501308	0.453956	0.624602	13.3395	18.1888	8.57174
ENSMUST00000051672.8	ENSMUSG00000046718	Bst2	protein_coding	1.18195e-32	1.39571e-28	2.22246	0.18676	6.91062	1.52366	0.00223225	0.0500866	0.0103939	0.0500866	12.2362	13.4473	16.7392	139.717	156.988	94.0743
ENSMUST00000021207.6	ENSMUSG00000020846	Rflnb	protein_coding	1.47001e-31	1.38869e-27	-0.97254	0.0832093	7.76293	0.292059	0.000419467	0.0099662	0.00831117	0.0099662	31.9455	33.8207	28.42	10.6639	11.1533	13.402
ENSMUST00000113705.7	ENSMUSG00000032366	Tpm1	protein_coding	1.06945e-30	8.41908e-27	-0.982737	0.0853211	8.67136	0.298428	0.00346283	0.00740707	0.00745671	0.00745671	172.918	165.637	152.52	52.6847	60.0815	69.0903
ENSMUST00000085425.5	ENSMUSG00000035692	Isg15	protein_coding	1.59193e-27	1.07419e-23	2.82096	0.259504	6.31217	2.46815	0.00520412	0.0958092	0.0133011	0.0958092	5.59711	6.4735	8.80508	114.68	163.46	78.5767
ENSMUST00000038757.7	ENSMUSG00000042109	Csdc2	protein_coding	1.27267e-25	7.51419e-22	-1.09634	0.104779	6.25743	0.373762	0.00238993	0.014078	0.0136066	0.014078	10.9344	7.62635	9.04221	3.08831	2.96428	2.98179
ENSMUST00000085065.11	ENSMUSG00000064215	Ifi27	protein_coding	3.81575e-25	2.00259e-21	1.94529	0.18779	6.58736	1.17756	0.00380379	0.0490939	0.0117205	0.0490939	7.95615	7.56294	12.5597	63.209	71.6187	55.2243
ENSMUST00000136907.7	ENSMUSG00000029761	Cald1	protein_coding	4.46601e-25	2.10948e-21	-0.968953	0.093675	6.97592	0.291616	0.0029781	0.00946635	0.0101844	0.0101844	44.705	53.5447	51.4115	16.435	21.0459	19.078
ENSMUST00000031750.13	ENSMUSG00000033542	Arhgef5	protein_coding	1.19415e-24	5.12768e-21	-0.835254	0.0814951	7.41689	0.215617	0.00094129	0.00696207	0.00902089	0.00902089	13.412	13.0992	11.2384	5.02051	5.19583	5.9788
ENSMUST00000010192.10	ENSMUSG00000010048	Ifrd2	protein_coding	1.9031e-24	7.49094e-21	0.832945	0.0816294	7.55925	0.214223	0.00129513	0.00631038	0.00869991	0.00869991	16.7426	15.2469	17.6289	40.3654	34.5504	37.8832
ENSMUST00000171796.7	ENSMUSG00000014602	Kif1a	protein_coding	4.27166e-24	1.55206e-20	-0.984223	0.0972054	8.18737	0.301947	0.000858903	0.0133144	0.00774334	0.0133144	16.9465	18.7559	18.5801	7.84462	5.77416	6.58116
ENSMUST00000119483.1	ENSMUSG00000039376	Synpo2l	protein_coding	8.22276e-24	2.77424e-20	-1.88924	0.18778	4.80896	1.11308	0.0149148	0.0379774	0.032491	0.0379774	2.9269	2.08507	1.78522	0.358864	0.256101	0.386376
ENSMUST00000173514.7	ENSMUSG00000026069	Il1rl1	protein_coding	3.72972e-23	1.17447e-19	1.55241	0.156636	8.32166	0.752436	0.00037269	0.0364293	0.00762673	0.0364293	16.6546	26.9484	26.659	102.908	110.381	107.524
ENSMUST00000115027.7	ENSMUSG00000029761	Cald1	protein_coding	8.98482e-22	2.65243e-18	-0.800729	0.0835141	8.38939	0.20072	0.00218301	0.00827888	0.00757886	0.00827888	35.9722	46.3726	42.9496	16.9105	19.7329	18.7657
ENSMUST00000102825.3	ENSMUSG00000074896	Ifit3	protein_coding	2.91438e-21	8.09751e-18	2.13757	0.225822	5.27575	1.43196	0.0119123	0.0645808	0.0233664	0.0645808	1.19089	1.07872	1.26741	9.49636	14.7569	6.8539
ENSMUST00000006760.2	ENSMUSG00000006585	Cdt1	protein_coding	1.13049e-20	2.96654e-17	0.759302	0.0814436	7.38155	0.178454	0.000843556	0.00602187	0.00910602	0.00910602	12.4152	14.5634	12.4846	30.3286	25.6184	27.3815
ENSMUST00000018005.9	ENSMUSG00000017861	Mybl2	protein_coding	4.34534e-20	1.08025e-16	0.74862	0.0815566	7.40347	0.176111	0.000818388	0.00915884	0.00905319	0.00915884	7.04447	8.06765	8.8336	17.2449	15.6194	17.0266
ENSMUST00000001872.4	ENSMUSG00000001819	Hoxd13	protein_coding	6.4216e-20	1.51659e-16	1.01735	0.111345	6.04016	0.319498	0.00376541	0.00747917	0.014831	0.014831	3.25073	3.48766	2.86081	9.50162	7.60328	9.16247
ENSMUST00000098106.8	ENSMUSG00000035969	Rusc2	protein_coding	7.61237e-20	1.7122e-16	-0.997237	0.109363	7.22479	0.303274	0.00844819	-0.00228621	0.00949233	0.00949233	9.98382	10.0914	10.4892	3.49413	3.53463	4.1537
ENSMUST00000090287.4	ENSMUSG00000018830	Myh11	protein_coding	1.61e-19	3.45668e-16	-0.931386	0.103063	7.9098	0.27299	0.0004839	0.0154492	0.00807911	0.0154492	16.3947	16.6526	20.0355	6.08123	7.91115	6.66352
ENSMUST00000027997.8	ENSMUSG00000026678	Rgs5	protein_coding	1.91761e-19	3.62089e-16	-2.03993	0.22621	6.64781	1.3098	0.00182295	0.0749334	0.0114268	0.0749334	20.2977	16.8607	14.5305	1.5368	2.15939	3.12669
ENSMUST00000098852.2	ENSMUSG00000032135	Mcam	protein_coding	1.99312e-19	3.62089e-16	-0.890357	0.0987787	7.43547	0.239008	0.00565925	-0.00417484	0.0089766	0.0089766	27.9965	25.82	24.7582	10.5072	10.6076	10.6915
ENSMUST00000072899.8	ENSMUSG00000032232	Cgnl1	protein_coding	1.89048e-19	3.62089e-16	-0.781985	0.0866999	7.39625	0.18853	0.00220473	0.00414562	0.00907057	0.00907057	9.66655	10.2726	8.44126	4.18849	4.01247	4.60872
ENSMUST00000020759.11	ENSMUSG00000020467	Efemp1	protein_coding	1.81918e-19	3.62089e-16	-0.765437	0.0848256	7.15735	0.181257	0.00112595	0.00573534	0.00966712	0.00966712	32.5059	29.2033	27.8682	13.2736	14.8691	12.9281
ENSMUST00000080322.7	ENSMUSG00000052776	Oas1a	protein_coding	3.51916e-19	6.15645e-16	3.20995	0.358609	5.22737	3.24545	0.020883	0.172017	0.0241525	0.172017	0.324108	0.788716	0.739514	13.2931	21.484	10.0391
ENSMUST00000043722.9	ENSMUSG00000033880	Lgals3bp	protein_coding	4.65886e-19	7.85916e-16	2.10664	0.236168	7.04305	1.39831	0.00212579	0.0815372	0.00998328	0.0815372	3.42748	4.74822	5.59372	43.6461	44.3765	25.2589
ENSMUST00000038398.6	ENSMUSG00000038507	Parp12	protein_coding	5.40813e-19	8.80854e-16	1.27854	0.143598	6.60106	0.515142	0.00188957	0.0290412	0.0116517	0.0290412	2.99906	3.68701	4.09138	12.5984	15.2861	10.4037
ENSMUST00000101642.9	ENSMUSG00000020451	Limk2	protein_coding	7.17219e-19	1.12924e-15	-0.692247	0.0780243	8.06558	0.15038	0.00125709	0.00701643	0.0078746	0.0078746	36.7968	28.9051	30.5673	15.534	15.8271	15.9912
ENSMUST00000112866.7	ENSMUSG00000061353	Cxcl12	protein_coding	1.35018e-18	2.05724e-15	-0.684711	0.077795	8.46587	0.147911	0.000285428	0.00879265	0.00753351	0.00879265	121.54	125.108	95.5952	54.1375	57.1625	57.6467
ENSMUST00000007949.3	ENSMUSG00000007805	Twist2	protein_coding	1.39695e-18	2.06198e-15	0.684435	0.0777974	7.64062	0.14682	0.000543703	0.00731129	0.00853495	0.00853495	31.6187	37.1712	28.0112	64.5593	60.2926	63.4674
ENSMUST00000152754.8	ENSMUSG00000000031	H19	lncRNA	1.72354e-18	2.46696e-15	1.23623	0.140896	8.66285	0.482301	0.00493847	0.0248391	0.0074586	0.0248391	47.5857	69.7366	55.3546	230.184	190.242	168.383
ENSMUST00000236905.1	ENSMUSG00000118383	Gm50321	lncRNA	3.0871e-18	4.2887e-15	-0.935339	0.107409	6.33385	0.276302	0.00199465	0.0153104	0.0131783	0.0153104	10.6051	10.9117	9.4927	3.26064	4.36383	4.47458
ENSMUST00000079857.8	ENSMUSG00000027330	Cdc25b	protein_coding	4.2842e-18	5.78171e-15	1.01885	0.117501	6.65902	0.324806	0.00933474	0.0074018	0.0113751	0.0113751	3.9867	4.12168	4.70338	13.3822	11.9702	9.89463
ENSMUST00000027991.11	ENSMUSG00000038530	Rgs4	protein_coding	5.04514e-18	6.6195e-15	-0.700531	0.0809642	7.81552	0.155089	0.000475135	0.00935767	0.00822358	0.00935767	42.1607	35.1919	37.7645	18.2404	20.9431	17.1435
ENSMUST00000038816.12	ENSMUSG00000034855	Cxcl10	protein_coding	5.65359e-18	7.21735e-15	2.16979	0.251152	5.49899	1.48809	0.0104678	0.0841482	0.0199035	0.0841482	2.03564	3.3256	2.59895	23.3801	32.1688	15.487
ENSMUST00000095228.4	ENSMUSG00000079003	Samd1	protein_coding	6.83464e-18	8.49546e-15	0.739284	0.0857873	7.0387	0.172267	0.00104328	0.00933744	0.00999591	0.00999591	8.11333	9.09981	9.5795	20.6614	17.4195	17.8013
ENSMUST00000171556.7	ENSMUSG00000014602	Kif1a	protein_coding	8.03414e-18	9.73038e-15	-0.902308	0.10493	7.45356	0.25746	0.00286533	0.0136503	0.00893415	0.0136503	11.3096	13.0401	13.4584	5.37148	4.26768	5.58363
ENSMUST00000010502.12	ENSMUSG00000010358	Ifi35	protein_coding	8.38558e-18	9.90212e-15	0.922498	0.10734	6.96063	0.269127	0.00160154	0.0156812	0.0102322	0.0156812	14.3434	12.6833	15.5225	33.4516	41.481	31.1644
ENSMUST00000201700.3	ENSMUSG00000058013	Sept11	protein_coding	1.12862e-17	1.30023e-14	-0.891725	0.104173	6.32288	0.244959	0.00303756	0.00497145	0.0132406	0.0132406	7.26543	7.7673	6.88072	2.58029	3.26299	3.06032
ENSMUST00000224095.1	ENSMUSG00000114196	Gm47547	lncRNA	1.29766e-17	1.45938e-14	-1.17346	0.137345	5.33912	0.43412	0.00593314	0.0203381	0.0223623	0.0223623	5.10083	4.10706	3.70578	1.11796	1.28684	1.52116
ENSMUST00000038188.13	ENSMUSG00000037736	Limch1	protein_coding	1.7475e-17	1.91957e-14	-0.981247	0.115313	6.90331	0.30481	0.00723921	0.0127063	0.0104183	0.0127063	8.28228	8.41181	6.74573	2.37458	3.26615	3.07705
ENSMUST00000144064.4	ENSMUSG00000029561	Oasl2	nonsense_mediated_decay	1.79322e-17	1.92502e-14	2.55335	0.300166	4.66517	2.064	0.0491878	0.0859617	0.0365347	0.0859617	0.390029	0.484123	0.428803	6.64465	8.38735	3.13018
ENSMUST00000088552.6	ENSMUSG00000067818	Myl9	protein_coding	1.849e-17	1.94079e-14	-0.67441	0.0793152	10.2604	0.143998	4.1355e-05	0.00939499	0.0092463	0.00939499	1138.89	888.753	1022.49	522.187	480.46	528.421
ENSMUST00000067102.2	ENSMUSG00000054215	Sprr2k	protein_coding	2.16705e-17	2.22519e-14	-0.915721	0.107929	6.08008	0.262146	0.00287625	0.010351	0.0145968	0.0145968	45.228	38.0498	47.7287	16.1054	16.6599	18.7451
ENSMUST00000006392.2	ENSMUSG00000021403	Serpinb9b	protein_coding	3.75165e-17	3.77032e-14	-1.4899	0.176939	7.10709	0.703512	0.00106389	0.0458975	0.00980259	0.0458975	29.9549	21.3238	23.4832	4.1058	6.0583	6.53272
ENSMUST00000041544.7	ENSMUSG00000064080	Fbln2	protein_coding	4.08465e-17	4.01946e-14	-0.695701	0.0827187	8.82209	0.153411	0.00166217	0.00860141	0.00744183	0.00860141	46.7945	58.0713	47.5513	27.6341	24.2496	23.0916
ENSMUST00000046944.5	ENSMUSG00000037813	D630003M21Rik	protein_coding	4.58436e-17	4.41913e-14	-1.80335	0.214764	4.7216	1.03097	0.0215397	0.0476454	0.0348409	0.0476454	2.29034	1.30876	1.74499	0.34919	0.29176	0.214534
ENSMUST00000023622.12	ENSMUSG00000022906	Parp9	protein_coding	8.21057e-17	7.75636e-14	1.70728	0.205	4.95572	0.918757	0.0339072	0.0214932	0.0291305	0.0291305	0.578791	0.587	0.71649	3.11645	4.85429	2.63502
ENSMUST00000021968.6	ENSMUSG00000021506	Pitx1	protein_coding	1.2407e-16	1.14909e-13	0.894369	0.108027	6.22861	0.253973	0.00240332	0.0151014	0.0137659	0.0151014	3.68831	3.71454	2.71161	9.16364	7.53031	7.70288
ENSMUST00000032114.7	ENSMUSG00000030036	Mogs	protein_coding	1.89889e-16	1.72485e-13	0.739095	0.0898235	7.002	0.17356	0.00128733	0.0108151	0.0101047	0.0108151	6.79959	6.9019	7.0136	16.9776	13.7103	12.598
ENSMUST00000212426.1	ENSMUSG00000005410	Mcm5	protein_coding	2.18722e-16	1.94927e-13	0.785824	0.0956998	8.42719	0.196246	0.00255145	0.0111862	0.0075553	0.0111862	32.8344	28.7525	36.8585	77.9704	67.0295	67.5627
ENSMUST00000110087.8	ENSMUSG00000037946	Fgd3	protein_coding	3.74432e-16	3.27517e-13	-0.662593	0.0813341	8.07798	0.139647	0.000548213	0.00937463	0.00786011	0.00937463	28.3815	23.3806	22.059	12.7075	11.6173	13.156
ENSMUST00000034453.5	ENSMUSG00000031972	Acta1	protein_coding	1.28297e-15	1.10181e-12	-1.79193	0.224097	7.54266	1.02357	0.0007434	0.0745861	0.00873515	0.0745861	104.845	87.4341	76.7913	13.4032	10.7641	21.7015
ENSMUST00000167327.1	ENSMUSG00000015143	Actn1	protein_coding	1.32031e-15	1.11363e-12	-0.59159	0.0740164	9.62563	0.110372	0.000242706	0.00648012	0.00797494	0.00797494	188.149	211.425	225.855	108.777	112.607	119.852
ENSMUST00000082430.9	ENSMUSG00000018339	Gpx3	protein_coding	1.62364e-15	1.34546e-12	-0.595811	0.0747834	7.97197	0.110782	0.000396371	0.00495895	0.00799247	0.00799247	65.0625	65.7025	74.1993	37.841	37.9921	35.8621
ENSMUST00000034562.8	ENSMUSG00000032060	Cryab	protein_coding	1.94735e-15	1.58589e-12	-0.665603	0.08378	8.0885	0.141331	0.00145191	0.00907671	0.00784801	0.00907671	156.91	128.646	161.582	78.7363	73.9636	73.1459
ENSMUST00000001592.14	ENSMUSG00000001552	Jup	protein_coding	2.24943e-15	1.80084e-12	-0.566736	0.0714966	9.08716	0.100858	0.000166474	0.00545991	0.00750116	0.00750116	92.961	95.1263	90.1807	51.2548	47.3478	57.8857
ENSMUST00000113112.1	ENSMUSG00000046432	Bex3	protein_coding	2.39515e-15	1.88554e-12	-0.872299	0.110153	6.81417	0.242291	0.00746713	0.0100567	0.0107335	0.0107335	70.959	49.7725	50.1577	22.607	22.7751	24.0744
ENSMUST00000139869.7	ENSMUSG00000031626	Sorbs2	protein_coding	3.13825e-15	2.43004e-12	-1.3616	0.172676	5.41157	0.591966	0.0215111	0.0232144	0.0212394	0.0232144	2.63156	3.7591	3.09084	0.845999	0.977058	0.594962
ENSMUST00000032961.3	ENSMUSG00000030717	Nupr1	protein_coding	3.5305e-15	2.68967e-12	-0.729189	0.0926476	6.74177	0.168552	0.00185885	0.0094378	0.0110165	0.0110165	42.3112	47.7972	53.6456	21.3416	22.6209	24.0291
ENSMUST00000006565.12	ENSMUSG00000006398	Cdc20	protein_coding	4.60519e-15	3.45272e-12	0.560383	0.0715025	8.64586	0.0997306	0.000206227	0.00669597	0.00746269	0.00746269	68.4996	65.297	67.1381	131.231	106.183	111.398
ENSMUST00000004774.3	ENSMUSG00000004655	Aqp1	protein_coding	4.69402e-15	3.46434e-12	1.23373	0.157467	7.52226	0.486381	0.000864398	0.0363293	0.00877928	0.0363293	11.1088	8.76357	10.6841	45.0043	31.0332	29.0784
ENSMUST00000060427.5	ENSMUSG00000053560	Ier2	protein_coding	5.06301e-15	3.67917e-12	0.602176	0.0769521	7.73354	0.111096	0.00052007	0.00236848	0.00836236	0.00836236	32.8735	31.2198	27.7642	58.452	54.7912	52.6785
ENSMUST00000032260.5	ENSMUSG00000030157	Clec2d	protein_coding	8.90509e-15	6.37308e-12	0.810606	0.104541	6.2892	0.206247	0.00296311	0.00844015	0.01343	0.01343	9.38723	10.8086	11.8692	21.4222	24.0225	25.232
ENSMUST00000172785.7	ENSMUSG00000073411	H2-D1	protein_coding	1.00555e-14	7.089e-12	1.38176	0.178556	6.69163	0.611038	0.00725306	0.0405701	0.0112289	0.0405701	5.03073	4.69681	6.19204	23.4155	24.919	15.3073
ENSMUST00000089332.4	ENSMUSG00000068196	Col8a1	protein_coding	1.13993e-14	7.91817e-12	-0.804437	0.104167	8.62304	0.207156	0.000184869	0.0160912	0.0074689	0.0160912	41.0109	53.7168	46.3387	20.7956	23.4931	18.0114
ENSMUST00000031318.5	ENSMUSG00000029371	Cxcl5	protein_coding	1.18358e-14	8.10222e-12	2.33812	0.302952	3.93206	1.68418	0.0510797	0.00409587	0.0865899	0.0865899	0.338735	0.475003	0.388634	5.23296	4.58315	2.96834
ENSMUST00000074805.11	ENSMUSG00000056888	Glipr1	protein_coding	1.76082e-14	1.18815e-11	-1.47832	0.192817	6.28364	0.700245	0.00343949	0.0523279	0.013461	0.0523279	47.0497	31.3446	32.9315	6.1644	8.74543	10.072
ENSMUST00000019998.8	ENSMUSG00000019851	Perp	protein_coding	2.14496e-14	1.42697e-11	-1.14885	0.150342	6.74168	0.423083	0.00113372	0.0327702	0.0110169	0.0327702	32.492	23.971	20.4455	6.94998	7.96431	8.71884
ENSMUST00000030080.6	ENSMUSG00000028385	Snx30	protein_coding	2.43023e-14	1.5943e-11	-0.650974	0.0853677	7.48257	0.135875	0.000797937	0.0101335	0.00886756	0.0101335	9.22047	10.9726	8.15257	4.5204	4.91494	5.07813
ENSMUST00000108831.7	ENSMUSG00000027580	Helz2	protein_coding	3.0832e-14	1.99495e-11	1.20824	0.159088	6.47262	0.468325	0.003406	0.0345577	0.0123533	0.0345577	0.676646	1.03104	0.959013	2.9674	3.36259	2.44125
ENSMUST00000045970.7	ENSMUSG00000034220	Gpc1	protein_coding	3.50149e-14	2.23499e-11	0.629464	0.0830616	8.36527	0.127147	0.000296642	0.0100522	0.00759508	0.0100522	18.372	20.4677	18.0011	40.6639	31.8495	33.2441
ENSMUST00000085708.2	ENSMUSG00000040033	Stat2	protein_coding	4.28038e-14	2.6627e-11	1.52221	0.201559	6.51946	0.743891	0.00221948	0.0587198	0.0120821	0.0587198	1.83439	2.11042	1.98947	10.9225	10.9049	5.98168
ENSMUST00000077337.8	ENSMUSG00000060969	Irx1	protein_coding	4.28431e-14	2.6627e-11	0.832373	0.110218	6.82215	0.222431	0.00263573	0.0155863	0.0107039	0.0155863	5.73799	7.06074	7.21949	16.9979	15.576	13.2134
ENSMUST00000098814.10	ENSMUSG00000056394	Lig1	protein_coding	4.88065e-14	2.99393e-11	0.640753	0.085036	7.52732	0.129608	0.00207843	0.00597061	0.00876826	0.00876826	10.8555	11.6389	12.5796	24.2238	21.1224	20.5652
ENSMUST00000028232.6	ENSMUSG00000026873	Phf19	protein_coding	4.96001e-14	3.0036e-11	0.81951	0.10879	6.26652	0.209227	0.00419662	0.00548795	0.0135562	0.0135562	2.62836	2.27265	2.47668	6.25072	5.26912	5.0835
ENSMUST00000022587.9	ENSMUSG00000022010	Tsc22d1	protein_coding	1.27335e-13	7.61336e-11	-0.533301	0.0719809	9.28132	0.0907447	0.000156373	0.00662078	0.00761551	0.00761551	271.374	225.427	233.168	151.266	136.692	134.879
ENSMUST00000091089.11	ENSMUSG00000026825	Dnm1	protein_coding	1.31533e-13	7.68333e-11	0.802997	0.108446	6.55513	0.203705	0.00575291	0.00707673	0.0118877	0.0118877	3.11781	3.36644	3.0972	8.44501	6.46279	6.45688
ENSMUST00000039026.7	ENSMUSG00000037010	Apln	protein_coding	1.31759e-13	7.68333e-11	0.913064	0.123314	6.2061	0.268353	0.00278723	0.0200222	0.01389	0.0200222	2.50548	2.76195	2.94287	8.27095	5.75224	6.44064
ENSMUST00000084296.9	ENSMUSG00000028873	Cdca8	protein_coding	1.35353e-13	7.79665e-11	0.574461	0.0776214	7.69342	0.106232	0.000535823	0.00850179	0.00843485	0.00850179	29.7172	28.4478	31.7914	59.7216	49.8313	48.5437
ENSMUST00000121200.8	ENSMUSG00000058056	Palld	protein_coding	1.84698e-13	1.05109e-10	-0.542302	0.073688	9.67379	0.0912219	0.000102683	0.00364045	0.0080422	0.0080422	136.342	154.664	127.139	77.7379	81.1883	80.8224
ENSMUST00000206846.1	ENSMUSG00000030748	Il4ra	nonsense_mediated_decay	1.88616e-13	1.0606e-10	0.763505	0.103785	7.07441	0.187808	0.00224089	0.013916	0.00989357	0.013916	4.7997	6.0129	6.11078	13.3902	11.5979	10.7764
ENSMUST00000032915.7	ENSMUSG00000030677	Kif22	protein_coding	2.06824e-13	1.14931e-10	0.687954	0.0936717	7.75053	0.152514	0.000660448	0.0125011	0.00833257	0.0125011	20.1976	21.132	25.4206	47.8822	40.5366	42.1188
ENSMUST00000058491.7	ENSMUSG00000049036	Tmem121	protein_coding	2.40808e-13	1.31168e-10	0.803389	0.109694	6.0598	0.198236	0.00333416	0.00242287	0.0147149	0.0147149	5.73581	4.80813	4.53153	11.1451	10.7695	11.3191
ENSMUST00000115390.4	ENSMUSG00000072082	Ccnf	protein_coding	2.41598e-13	1.31168e-10	0.575837	0.0786287	7.60243	0.104215	0.000662974	0.00526087	0.00861073	0.00861073	9.26291	9.91791	9.69969	18.9935	15.9447	16.0212
ENSMUST00000207084.1	ENSMUSG00000039361	Picalm	protein_coding	4.04817e-13	2.17285e-10	-0.652587	0.0899631	8.1713	0.133689	0.00438079	0.00302881	0.00775926	0.00775926	57.3416	58.2505	54.6023	26.6256	33.5549	27.48
ENSMUST00000048967.8	ENSMUSG00000037852	Cpe	protein_coding	4.72575e-13	2.48018e-10	-0.518978	0.0717518	8.7084	0.086429	0.000272672	0.00676178	0.00744981	0.00744981	116.576	127.42	99.6507	67.0723	70.149	63.6477
ENSMUST00000034300.7	ENSMUSG00000031839	Hsbp1	protein_coding	4.70995e-13	2.48018e-10	-0.544296	0.0752474	8.06878	0.0952462	0.000622412	0.00733877	0.00787084	0.00787084	123.46	105.16	112.69	58.49	67.0034	70.0795
ENSMUST00000172435.7	ENSMUSG00000038552	Fndc4	protein_coding	5.14993e-13	2.67309e-10	0.75591	0.104678	6.38695	0.184124	0.00356506	0.0123145	0.0128712	0.0128712	5.56481	4.00579	4.667	10.4166	9.39347	10.0112
ENSMUST00000142890.7	ENSMUSG00000028152	Tspan5	nonsense_mediated_decay	5.34548e-13	2.71493e-10	0.640149	0.0887098	6.98584	0.130708	0.00165031	0.00806314	0.0101538	0.0101538	7.3148	8.39435	7.15313	16.2098	13.4634	13.1408
ENSMUST00000179543.7	ENSMUSG00000095567	Noc2l	protein_coding	5.31095e-13	2.71493e-10	0.519623	0.0719989	9.16973	0.0872229	0.000119122	0.00765663	0.00754231	0.00765663	67.0727	69.4216	79.0946	124.48	109.567	123.342
ENSMUST00000162746.1	ENSMUSG00000026580	Selp	protein_coding	7.33061e-13	3.67281e-10	-1.9224	0.268001	4.08064	1.16753	0.0382471	0.0353051	0.0694893	0.0694893	1.63603	1.30726	0.906685	0.223092	0.186385	0.132198
ENSMUST00000170794.7	ENSMUSG00000024247	Pkdcc	protein_coding	7.38698e-13	3.67281e-10	0.735549	0.102557	6.47436	0.173017	0.0034341	0.00995012	0.0123429	0.0123429	4.82389	4.38264	4.43589	10.9047	9.51001	7.96284
ENSMUST00000065896.8	ENSMUSG00000028678	Kif2c	protein_coding	8.09716e-13	3.98397e-10	0.621169	0.0867615	7.38552	0.124788	0.000842833	0.0104485	0.00909642	0.0104485	11.6208	11.065	13.4309	24.4549	21.4638	20.3178
ENSMUST00000049343.14	ENSMUSG00000038644	Pold1	protein_coding	8.34386e-13	3.98713e-10	0.660613	0.0923238	7.89362	0.141151	0.000845906	0.0119396	0.00810278	0.0119396	12.483	13.8413	15.6413	28.9479	24.2957	27.0178
ENSMUST00000093078.12	ENSMUSG00000025316	Banp	protein_coding	8.35681e-13	3.98713e-10	0.917902	0.128285	6.24904	0.26544	0.0110325	0.00481367	0.0136531	0.0136531	3.39794	3.71011	4.57274	10.047	9.11964	9.56345
ENSMUST00000034512.6	ENSMUSG00000032014	Oaf	protein_coding	8.2879e-13	3.98713e-10	0.51757	0.0723237	8.39634	0.0847686	0.000271711	0.00523434	0.00757436	0.00757436	37.0218	35.1953	39.5816	66.6949	58.8787	60.1652
ENSMUST00000146233.7	ENSMUSG00000040483	Xaf1	protein_coding	9.48086e-13	4.47819e-10	1.85989	0.260567	4.5386	1.11923	0.0287893	0.0730537	0.0409556	0.0730537	0.313079	0.435272	0.528179	2.36663	4.03402	1.97573
ENSMUST00000017153.3	ENSMUSG00000017009	Sdc4	protein_coding	9.76295e-13	4.56577e-10	0.797476	0.111788	8.137	0.205786	0.00033185	0.0184131	0.00779465	0.0184131	23.5874	28.691	28.8457	69.3036	59.0159	50.4933
ENSMUST00000046212.1	ENSMUSG00000032902	Slc16a1	protein_coding	1.20026e-12	5.55815e-10	0.685397	0.0964622	6.5259	0.145745	0.00191116	0.00410713	0.0120463	0.0120463	3.31572	3.80718	3.41585	6.44306	7.69226	6.51843
ENSMUST00000032501.5	ENSMUSG00000030351	Tspan11	protein_coding	1.27307e-12	5.83808e-10	1.66117	0.234059	5.15584	0.893582	0.00809711	0.0740785	0.0253565	0.0740785	0.28418	0.410026	0.455375	2.54101	2.16786	1.37602
ENSMUST00000032910.12	ENSMUSG00000030672	Mylpf	protein_coding	1.46452e-12	6.65144e-10	-1.89512	0.267755	4.67086	1.16348	0.0238814	0.0836579	0.036357	0.0836579	18.5673	12.3984	7.93222	2.26704	1.40976	1.8085
ENSMUST00000038765.5	ENSMUSG00000037035	Inhbb	protein_coding	1.72853e-12	7.70241e-10	0.763473	0.10822	6.65418	0.188921	0.0019679	0.0155996	0.0113973	0.0155996	2.68862	3.59958	3.1199	6.97699	7.19768	5.79711
ENSMUST00000075161.11	ENSMUSG00000059430	Actg2	protein_coding	1.72224e-12	7.70241e-10	-0.727947	0.103177	10.7786	0.171746	2.3123e-05	0.0159452	0.0110395	0.0159452	1671.16	1380.86	1641.73	698.943	682.569	865.689
ENSMUST00000043237.13	ENSMUSG00000038375	Trp53inp2	protein_coding	2.10052e-12	9.24475e-10	-0.512119	0.0728721	8.32758	0.0812864	0.000343255	0.0029151	0.00762226	0.00762226	39.0229	35.1978	36.3975	21.271	21.073	23.2425
ENSMUST00000029451.11	ENSMUSG00000027858	Tspan2	protein_coding	2.13337e-12	9.24475e-10	-1.10057	0.156654	6.58588	0.392824	0.0017307	0.03508	0.011728	0.03508	9.93751	9.91442	7.61833	2.2742	3.48375	3.32172
ENSMUST00000033386.11	ENSMUSG00000031070	Mrgprf	protein_coding	2.12459e-12	9.24475e-10	2.31489	0.329472	5.29637	1.73787	0.0416196	0.121208	0.0230368	0.121208	0.607102	0.620121	1.33056	11.2069	7.89646	5.76462
ENSMUST00000101126.2	ENSMUSG00000030029	Lrig1	protein_coding	2.33764e-12	9.94738e-10	0.661054	0.0942653	7.00694	0.137289	0.00323909	0.00450009	0.0100898	0.0100898	3.87903	4.19265	4.68443	8.73525	7.96113	7.68452
ENSMUST00000054002.3	ENSMUSG00000053113	Socs3	protein_coding	2.33304e-12	9.94738e-10	0.878969	0.125335	6.04481	0.250627	0.00251424	0.021049	0.0148034	0.021049	2.54925	3.19986	2.70697	8.01185	6.77113	5.52757
ENSMUST00000022660.13	ENSMUSG00000034205	Loxl2	protein_coding	2.78271e-12	1.17356e-09	-0.520516	0.0744841	9.74943	0.0865545	0.000165055	0.00642679	0.00815676	0.00815676	101.949	128.636	111.496	68.5477	67.6699	63.6694
ENSMUST00000057311.3	ENSMUSG00000047281	Sfn	protein_coding	2.84429e-12	1.18891e-09	-1.3287	0.190216	7.84393	0.573051	0.000485961	0.0537872	0.00817836	0.0537872	102.877	66.7527	76.6508	20.4494	16.8437	27.4365
ENSMUST00000209501.1	ENSMUSG00000110340	1600027J07Rik	lncRNA	2.87727e-12	1.19215e-09	-1.15385	0.165223	4.87046	0.426681	0.00994377	0.0241422	0.0310043	0.0310043	28.9555	21.3251	22.4985	6.85433	6.2986	9.34052
ENSMUST00000172753.1	ENSMUSG00000090877	Hspa1b	protein_coding	2.91592e-12	1.19766e-09	0.80586	0.115424	7.29971	0.21081	0.0010253	0.0189588	0.00930518	0.0189588	9.37171	10.8046	7.92275	24.1436	20.2419	17.9691
ENSMUST00000105256.9	ENSMUSG00000078429	Ctdsp2	protein_coding	4.44082e-12	1.80825e-09	0.514941	0.0743878	8.76937	0.0861896	0.000616696	0.00768361	0.00744305	0.00768361	23.2584	29.0838	27.0309	46.1377	43.5282	41.4407
ENSMUST00000102691.10	ENSMUSG00000055612	Cdca7	protein_coding	4.79342e-12	1.93515e-09	0.712391	0.103072	6.8498	0.164999	0.00150916	0.0144267	0.0106034	0.0144267	6.68565	8.66646	8.99324	16.4015	17.2299	14.9949
ENSMUST00000186857.6	ENSMUSG00000026104	Stat1	protein_coding	4.92447e-12	1.97121e-09	1.41947	0.205491	6.85181	0.655144	0.00574159	0.0575979	0.0105963	0.0575979	2.62774	3.52955	3.81666	14.7113	17.0629	9.53664
ENSMUST00000020362.2	ENSMUSG00000020155	Kcnmb1	protein_coding	5.05265e-12	2.00552e-09	-1.13746	0.164751	5.28947	0.420714	0.0059403	0.0347741	0.0231468	0.0347741	2.89024	2.06196	2.4388	0.646297	0.714005	0.987917
ENSMUST00000102493.7	ENSMUSG00000020836	Coro6	protein_coding	5.93787e-12	2.33724e-09	-1.54963	0.2252	4.2708	0.752249	0.0216972	0.0181035	0.0543755	0.0543755	1.65045	1.43938	1.3462	0.233011	0.307185	0.399183
ENSMUST00000114772.8	ENSMUSG00000023092	Fhl1	protein_coding	6.39216e-12	2.49527e-09	-0.512276	0.0745603	9.04198	0.085399	0.000572461	0.00776639	0.00748325	0.00776639	151.065	147.68	137.953	77.9457	82.6598	98.4931
ENSMUST00000084250.10	ENSMUSG00000028896	Rcc1	protein_coding	7.9936e-12	3.09483e-09	0.571152	0.083518	7.88753	0.103574	0.00235109	0.00478643	0.0081118	0.0081118	22.7847	22.3934	25.2831	44.5084	41.0387	37.8803
ENSMUST00000147380.1	ENSMUSG00000027715	Ccna2	nonsense_mediated_decay	8.34345e-12	3.20402e-09	0.779075	0.114024	6.44335	0.185736	0.00697019	-0.00240936	0.0125322	0.0125322	8.62284	7.6566	8.02444	17.4255	16.3544	18.4301
ENSMUST00000103205.10	ENSMUSG00000027395	Polr1b	protein_coding	8.81474e-12	3.35771e-09	0.533303	0.0781437	7.59829	0.0925033	0.000540529	0.00843418	0.00861913	0.00861913	9.40805	11.6094	11.1042	19.5653	17.0058	17.3375
ENSMUST00000210564.2	ENSMUSG00000109901	Chmp1b	protein_coding	9.3196e-12	3.52162e-09	-0.671545	0.0985155	6.65998	0.146938	0.00154282	0.0130151	0.0113707	0.0130151	15.4406	14.4743	15.0548	6.2066	8.58811	8.00117
ENSMUST00000084501.3	ENSMUSG00000028370	Pappa	protein_coding	9.74032e-12	3.65138e-09	-0.86349	0.126792	6.95867	0.242976	0.00119091	0.0229234	0.0102383	0.0229234	3.80815	5.12978	4.0314	1.54192	2.15005	1.71378
ENSMUST00000151339.1	ENSMUSG00000030587	2200002D01Rik	retained_intron	9.91233e-12	3.68661e-09	-0.916483	0.134623	5.86864	0.27373	0.00496837	0.0222167	0.0159614	0.0222167	69.0999	52.4024	62.2804	24.932	19.3813	27.7876
ENSMUST00000103053.9	ENSMUSG00000027574	Nkain4	protein_coding	1.11572e-11	4.08526e-09	-1.3814	0.203424	5.39311	0.622137	0.00705942	0.0550128	0.0215236	0.0550128	22.0555	11.6987	13.8476	3.22692	3.85252	4.34176
ENSMUST00000023238.5	ENSMUSG00000022575	Gsdmd	protein_coding	1.1138e-11	4.08526e-09	0.92455	0.136144	5.70022	0.27868	0.00705751	0.0207453	0.0174085	0.0207453	2.55664	2.79147	3.69673	7.83497	8.08218	6.41465
ENSMUST00000026565.6	ENSMUSG00000025492	Ifitm3	protein_coding	1.1333e-11	4.08815e-09	1.03823	0.15294	9.33336	0.351443	0.000175113	0.0349107	0.00765668	0.0349107	295.23	350.77	438.324	1076.45	1107.15	834.113
ENSMUST00000081435.4	ENSMUSG00000035929	H2-Q4	protein_coding	1.13382e-11	4.08815e-09	1.67836	0.247239	4.7987	0.918422	0.0162681	0.075423	0.0327517	0.075423	0.71813	0.758087	1.05267	5.42748	5.52062	2.89684
ENSMUST00000132985.1	ENSMUSG00000067818	Myl9	processed_transcript	1.42515e-11	5.09966e-09	-0.827837	0.122546	5.93902	0.215683	0.00705897	0.00555203	0.0154672	0.0154672	92.1106	88.9997	87.4453	45.6629	32.3312	34.965
ENSMUST00000030336.10	ENSMUSG00000028599	Tnfrsf1b	protein_coding	1.52199e-11	5.39073e-09	0.727764	0.107884	6.73757	0.172859	0.00164732	0.0158112	0.0110338	0.0158112	3.50343	4.65505	4.13814	9.50932	8.19478	7.40996
ENSMUST00000041065.13	ENSMUSG00000035441	Myo1d	protein_coding	1.52932e-11	5.39073e-09	-0.533454	0.0790878	7.56063	0.0890365	0.000685323	0.0038952	0.008697	0.008697	11.3706	13.3943	12.8533	7.56301	6.89584	7.31776
ENSMUST00000041110.11	ENSMUSG00000036918	Ttc7	protein_coding	1.6169e-11	5.65723e-09	0.744652	0.110532	6.44639	0.172572	0.00581245	0.00196252	0.0125134	0.0125134	2.19866	2.34401	2.63129	4.64152	5.26735	5.02357
ENSMUST00000002180.7	ENSMUSG00000002111	Spi1	protein_coding	1.72999e-11	6.00839e-09	1.18337	0.175909	4.77194	0.440295	0.0129662	0.0122654	0.0334499	0.0334499	0.744137	0.930109	0.76452	2.78927	3.11353	2.10746
ENSMUST00000081946.4	ENSMUSG00000003438	Timm50	protein_coding	1.94991e-11	6.72277e-09	0.483994	0.0721331	8.43759	0.0760751	0.000255576	0.00699457	0.00754921	0.00754921	70.8551	62.8069	66.9316	106.645	97.3349	117.804
ENSMUST00000107094.1	ENSMUSG00000052684	Jun	protein_coding	1.96493e-11	6.72546e-09	0.680349	0.101414	8.34562	0.151204	0.000235015	0.0151923	0.00760896	0.0151923	24.9665	29.9048	22.707	57.099	49.8671	44.3487
ENSMUST00000102824.3	ENSMUSG00000034459	Ifit1	protein_coding	2.22711e-11	7.568e-09	2.61441	0.390777	5.51795	2.23379	0.0138566	0.215203	0.0196205	0.215203	0.443687	0.991613	1.16173	11.028	17.0094	6.75773
ENSMUST00000065987.13	ENSMUSG00000057880	Abat	protein_coding	2.45435e-11	8.28062e-09	-0.665036	0.0996149	6.44584	0.136223	0.00236784	0.00205929	0.0125168	0.0125168	5.29856	5.367	5.17446	2.91184	2.73879	2.4128
ENSMUST00000021536.8	ENSMUSG00000021114	Atp6v1d	protein_coding	2.7579e-11	9.23875e-09	-0.541362	0.0812984	7.40242	0.0941224	0.000858435	0.00689221	0.00905571	0.00905571	20.3659	18.2994	19.3701	9.90649	11.2346	12.1887
ENSMUST00000086461.12	ENSMUSG00000029363	Rfc5	protein_coding	2.84909e-11	9.47702e-09	0.543311	0.0816498	7.39826	0.0945833	0.000934306	0.00659957	0.00906573	0.00906573	13.858	11.7939	14.1286	23.4709	21.521	22.2982
ENSMUST00000032492.8	ENSMUSG00000030342	Cd9	protein_coding	3.09677e-11	1.02289e-08	0.502647	0.0756783	7.93876	0.0786618	0.000552898	0.00302895	0.00803791	0.00803791	59.3416	59.0066	64.4879	105.759	97.7209	93.8936
ENSMUST00000210901.1	ENSMUSG00000033355	Rtp4	protein_coding	3.21476e-11	1.05449e-08	2.7706	0.417487	4.18009	2.45481	0.200694	-0.0107709	0.0607496	0.0607496	0.509872	0.5834	0.362611	8.08154	13.4256	4.21326
ENSMUST00000026661.3	ENSMUSG00000025574	Tk1	protein_coding	3.38886e-11	1.10393e-08	0.584653	0.0882016	7.67026	0.111881	0.000822283	0.010847	0.0084781	0.010847	30.5413	29.7255	35.8424	61.3289	51.5706	56.6788
ENSMUST00000056416.8	ENSMUSG00000008658	Rbfox1	protein_coding	3.44715e-11	1.11522e-08	-1.33497	0.201473	4.50857	0.543132	0.0187334	-0.00812586	0.0421534	0.0421534	1.87357	1.94491	1.72135	0.545346	0.417525	0.473253
ENSMUST00000111118.7	ENSMUSG00000027175	Tcp11l1	protein_coding	3.51494e-11	1.12188e-08	-0.956439	0.144407	5.36388	0.29681	0.00930407	0.018668	0.0219761	0.0219761	1.81309	2.08306	1.53543	0.823322	0.680108	0.560312
ENSMUST00000043961.11	ENSMUSG00000018800	Abca5	protein_coding	3.51523e-11	1.12188e-08	-1.01489	0.153233	5.68345	0.337178	0.00583353	0.029387	0.0175792	0.029387	2.0999	2.3756	1.55793	0.591462	0.821949	0.720351
ENSMUST00000096385.10	ENSMUSG00000022558	Mroh1	protein_coding	3.72407e-11	1.18056e-08	-0.551439	0.0833662	8.10197	0.0995654	0.000282284	0.0101426	0.0078328	0.0101426	22.8775	20.8174	18.5232	11.7998	10.5797	13.0435
ENSMUST00000087315.13	ENSMUSG00000007029	Vars	protein_coding	4.15628e-11	1.30879e-08	0.489062	0.0741184	9.35861	0.0765677	0.000561989	0.00545438	0.00767831	0.00767831	54.9307	59.5394	48.5918	89.5634	80.8291	92.019
ENSMUST00000079625.10	ENSMUSG00000060519	Tor3a	protein_coding	4.31552e-11	1.34993e-08	0.984568	0.14934	5.82252	0.317575	0.008899	0.0245544	0.0163159	0.0245544	1.69324	1.83476	1.7021	5.25481	5.46009	3.41243
ENSMUST00000131070.1	ENSMUSG00000056999	Ide	protein_coding	4.47242e-11	1.38981e-08	-0.530288	0.0804989	7.5842	0.0906443	0.00107216	0.00678138	0.00864794	0.00864794	14.4261	18.0897	16.4758	8.64184	9.97085	9.67943
ENSMUST00000205568.1	ENSMUSG00000030678	Maz	protein_coding	4.81033e-11	1.48504e-08	0.600057	0.09124	7.29656	0.113849	0.00317417	0.00411078	0.00931294	0.00931294	11.4207	11.0923	8.91583	19.4515	17.6572	19.489
ENSMUST00000066330.14	ENSMUSG00000005417	Mprip	protein_coding	5.18619e-11	1.59068e-08	-0.548769	0.0835839	7.43511	0.0925774	0.00150197	0.00128939	0.00897744	0.00897744	7.96873	7.58697	6.98933	4.43114	4.06646	4.32289
ENSMUST00000058639.10	ENSMUSG00000049882	Vcpkmt	protein_coding	5.62391e-11	1.71381e-08	0.710528	0.108421	6.13772	0.159923	0.00336338	0.00722207	0.0142693	0.0142693	10.1692	8.51737	9.94602	21.2333	17.9875	18.4048
ENSMUST00000071065.7	ENSMUSG00000056749	Nfil3	protein_coding	6.06577e-11	1.8366e-08	0.548694	0.0838712	7.11437	0.0935041	0.000768911	0.00321162	0.00978265	0.00978265	13.1045	12.8976	13.6873	24.3587	22.4418	21.0466
ENSMUST00000108566.7	ENSMUSG00000044876	Zfp444	protein_coding	6.11681e-11	1.84026e-08	0.745272	0.113941	6.28657	0.182208	0.0047148	0.014759	0.0134447	0.014759	5.01462	6.98072	5.5238	13.1351	10.8022	12.5079
ENSMUST00000124830.2	ENSMUSG00000054889	Dsp	protein_coding	6.34367e-11	1.89644e-08	-2.28345	0.349396	4.443	1.65375	0.138113	-0.0262229	0.0450036	0.0450036	0.699881	0.940716	0.640913	0.0455341	0.0822336	0.10877
ENSMUST00000065482.5	ENSMUSG00000053192	Mllt11	protein_coding	6.76984e-11	2.01111e-08	-0.660638	0.101237	7.27838	0.143231	0.00080388	0.0145694	0.00935786	0.0145694	37.2379	30.7022	29.1582	14.5724	16.2464	18.7276
ENSMUST00000179022.7	ENSMUSG00000062075	Lmnb2	protein_coding	6.90569e-11	2.03865e-08	0.591441	0.0906744	7.14441	0.108494	0.00263124	0.00181056	0.00970152	0.00970152	7.44094	6.85388	7.04398	13.7958	11.7709	12.5588
ENSMUST00000132139.8	ENSMUSG00000031626	Sorbs2	protein_coding	7.19203e-11	2.08619e-08	-1.1702	0.179572	5.36278	0.427373	0.0263761	-0.00567363	0.0219933	0.0219933	1.94908	2.92056	2.59248	0.74721	0.723083	0.784756
ENSMUST00000112933.1	ENSMUSG00000079415	Cntf	protein_coding	7.19923e-11	2.08619e-08	-1.01954	0.156456	5.11465	0.341211	0.00866401	0.0280537	0.026078	0.0280537	11.0317	8.36941	7.29908	2.7517	2.87461	3.79318
ENSMUST00000236290.1	ENSMUSG00000024899	Papss2	protein_coding	7.11939e-11	2.08619e-08	-0.6346	0.0973594	6.75001	0.124426	0.00323532	0.00127764	0.010983	0.010983	9.5217	10.846	9.27359	4.83881	5.55568	5.11417
ENSMUST00000053266.10	ENSMUSG00000041859	Mcm3	protein_coding	7.51074e-11	2.16319e-08	0.563379	0.0865393	8.59335	0.104206	0.000313784	0.0109198	0.00747817	0.0109198	33.2974	35.5741	41.3594	69.7212	59.1926	61.8583
ENSMUST00000131668.2	ENSMUSG00000035969	Rusc2	protein_coding	7.61252e-11	2.17921e-08	-0.745979	0.114624	7.72861	0.182712	0.00302811	0.0166798	0.0083711	0.0166798	17.5272	14.3973	14.8936	8.44068	6.08258	7.56536
ENSMUST00000066166.5	ENSMUSG00000053626	Tll1	protein_coding	8.15275e-11	2.31289e-08	-1.01839	0.15673	7.35176	0.340613	0.000667658	0.0361786	0.00917808	0.0361786	14.7066	20.5565	14.3363	4.63926	6.76974	6.2709
ENSMUST00000048770.15	ENSMUSG00000040666	Sh3bgr	protein_coding	8.17741e-11	2.31289e-08	-1.2887	0.198344	4.6061	0.52331	0.0205295	0.0108272	0.038481	0.038481	5.32834	3.49035	4.01828	1.10776	1.026	1.32804
ENSMUST00000224227.1	ENSMUSG00000025006	Sorbs1	retained_intron	9.36597e-11	2.63329e-08	-0.686209	0.105948	6.57257	0.148529	0.00504121	0.00403913	0.0117963	0.0117963	9.31558	11.4155	9.04829	4.56838	4.87861	5.31586
ENSMUST00000019268.10	ENSMUSG00000019124	Scrn1	protein_coding	9.68341e-11	2.70643e-08	-0.665728	0.102866	6.54968	0.145656	0.00149408	0.014378	0.0119168	0.014378	6.36261	4.89367	5.58248	3.15694	2.82565	2.52909
ENSMUST00000024575.7	ENSMUSG00000023809	Rps6ka2	protein_coding	1.0826e-10	3.00797e-08	-0.510047	0.0790165	7.55994	0.0843046	0.000666948	0.00715851	0.00869845	0.00869845	13.0946	11.307	11.5941	7.03281	6.50254	7.83304
ENSMUST00000113991.7	ENSMUSG00000045103	Dmd	protein_coding	1.2251e-10	3.38401e-08	-1.13172	0.175837	5.65735	0.421338	0.00950099	0.0368768	0.0178565	0.0368768	3.78639	4.10074	3.33385	0.844225	1.34222	1.45549
ENSMUST00000111691.1	ENSMUSG00000034101	Ctnnd1	protein_coding	1.32307e-10	3.63337e-08	-0.519852	0.0809171	8.54434	0.0889308	0.0013601	0.00846126	0.00749646	0.00846126	30.3063	36.7863	36.7285	18.8587	22.4001	19.795
ENSMUST00000100392.4	ENSMUSG00000034773	BC030867	protein_coding	1.35334e-10	3.695e-08	0.662779	0.10322	6.37067	0.144568	0.00288118	0.0131003	0.0129664	0.0131003	3.72024	4.30109	4.94659	9.041	7.67975	8.0129
ENSMUST00000116456.9	ENSMUSG00000018001	Cyth3	protein_coding	1.53267e-10	4.16058e-08	0.560342	0.0875248	8.11881	0.103388	0.00032865	0.0111622	0.00781421	0.0111622	17.0576	19.3536	21.4737	34.6491	35.2004	29.8662
ENSMUST00000030317.13	ENSMUSG00000028583	Pdpn	protein_coding	1.54342e-10	4.16582e-08	0.46983	0.0733992	8.1573	0.0725511	0.000307686	0.00760372	0.00777347	0.00777347	43.7896	44.6125	53.0436	73.9885	74.1307	74.1405
ENSMUST00000172503.2	ENSMUSG00000073411	H2-D1	protein_coding	1.57875e-10	4.23697e-08	1.23382	0.192858	5.95267	0.501327	0.0192384	0.0365528	0.0153769	0.0365528	3.42332	4.04742	2.62513	12.9008	13.4489	8.2401
ENSMUST00000052631.7	ENSMUSG00000042821	Snai1	protein_coding	1.78334e-10	4.75901e-08	0.53184	0.0833745	7.98184	0.0931977	0.000440344	0.00998663	0.00797934	0.00998663	39.1648	34.6446	36.3413	71.1853	59.3183	55.5049
ENSMUST00000120537.7	ENSMUSG00000053175	Bcl3	protein_coding	1.88453e-10	5.00077e-08	1.33114	0.208955	5.09079	0.583977	0.0118278	0.0536657	0.0265073	0.0536657	0.831365	1.17296	1.63965	4.45284	4.45929	4.29787
ENSMUST00000043929.10	ENSMUSG00000038903	Ccdc68	protein_coding	1.9213e-10	5.06987e-08	-1.31548	0.206593	5.03702	0.570363	0.0108666	0.0531543	0.0275087	0.0531543	7.02249	6.58006	5.46467	1.14375	1.80285	2.21071
ENSMUST00000061614.7	ENSMUSG00000048582	Gja3	protein_coding	1.98756e-10	5.18676e-08	-1.13833	0.178918	4.69439	0.417691	0.0123788	0.0238102	0.0356389	0.0356389	2.53215	1.92979	1.463	0.634309	0.571417	0.61694
ENSMUST00000024701.8	ENSMUSG00000023908	Pkmyt1	protein_coding	1.97808e-10	5.18676e-08	0.665174	0.104537	6.31385	0.139042	0.00310043	0.00478067	0.0132916	0.0132916	4.98987	4.932	4.70967	10.7777	8.51917	8.99172
ENSMUST00000235622.1	ENSMUSG00000118365	Gm41724	lncRNA	2.09807e-10	5.44506e-08	-0.888266	0.139797	5.29874	0.242489	0.00631551	0.000914218	0.0229992	0.0229992	25.6262	22.6481	27.0375	10.6259	10.1743	9.41549
ENSMUST00000048568.5	ENSMUSG00000042106	Inka1	protein_coding	2.40521e-10	6.20808e-08	0.597826	0.0943993	6.59522	0.109485	0.00168598	0.00114723	0.0116809	0.0116809	15.3742	16.9948	15.765	30.4087	28.5138	27.0887
ENSMUST00000070375.7	ENSMUSG00000045573	Penk	protein_coding	2.43654e-10	6.25476e-08	2.01464	0.318221	5.14249	1.33915	0.0149535	0.136943	0.0255878	0.136943	1.17048	1.02945	1.54392	15.6436	8.69021	5.73115
ENSMUST00000105410.9	ENSMUSG00000001436	Slc19a1	protein_coding	2.53194e-10	6.46453e-08	0.799328	0.126376	6.69698	0.209109	0.0127506	0.00903879	0.0112056	0.0112056	5.37606	5.9368	7.35518	14.937	11.9885	13.8572
ENSMUST00000035938.2	ENSMUSG00000035042	Ccl5	protein_coding	2.60354e-10	6.61158e-08	1.72686	0.273207	4.50623	0.984188	0.0283185	0.0836446	0.0422496	0.0836446	1.81344	3.40541	4.0912	18.248	17.4258	13.8885
ENSMUST00000061318.8	ENSMUSG00000047497	Adamts12	protein_coding	2.62488e-10	6.63014e-08	-0.984838	0.155842	6.81395	0.320116	0.00165191	0.0347783	0.0107343	0.0347783	3.98791	6.18735	4.98953	1.59659	2.23655	1.71984
ENSMUST00000066674.7	ENSMUSG00000041261	Car8	protein_coding	3.00601e-10	7.51249e-08	-1.01362	0.160932	4.9064	0.33353	0.00865835	0.0229673	0.0301902	0.0301902	2.2891	1.8356	1.69037	0.541652	0.765415	0.77349
ENSMUST00000133064.7	ENSMUSG00000073599	Ecscr	protein_coding	2.99867e-10	7.51249e-08	-0.575013	0.0912886	6.73785	0.108554	0.00146782	0.0102346	0.0110326	0.0110326	36.1146	29.7652	37.9279	18.3035	18.612	20.0718
ENSMUST00000160359.1	ENSMUSG00000032374	Plod2	protein_coding	3.04687e-10	7.55424e-08	-0.574715	0.0912772	8.00076	0.109087	0.000694902	0.0118024	0.00795463	0.0118024	33.5962	41.6191	32.7198	17.7205	22.1061	19.8931
ENSMUST00000023072.6	ENSMUSG00000022438	Parvb	protein_coding	3.05471e-10	7.55424e-08	-0.608717	0.0966835	7.29695	0.122378	0.00078951	0.013232	0.00931198	0.013232	15.2522	13.2164	12.7874	7.39601	6.42757	8.52434
ENSMUST00000111623.8	ENSMUSG00000016487	Ppfibp1	protein_coding	3.13745e-10	7.71335e-08	-0.825239	0.13116	7.31242	0.224949	0.016167	0.00963753	0.00927397	0.00963753	14.9233	12.3291	15.1719	4.88169	6.84997	6.6905
ENSMUST00000108836.1	ENSMUSG00000069874	Irgm2	protein_coding	3.15171e-10	7.71335e-08	2.17281	0.345377	4.76371	1.55948	0.0262783	0.15265	0.0336701	0.15265	0.213603	0.344787	0.53187	3.28925	4.1465	1.93129
ENSMUST00000095664.5	ENSMUSG00000030059	Tmf1	protein_coding	3.18401e-10	7.75225e-08	-0.622775	0.0990174	6.76948	0.120887	0.00380161	0.00186411	0.0109051	0.0109051	7.68547	7.05913	6.47411	3.50861	3.93596	3.70156
ENSMUST00000005592.6	ENSMUSG00000030468	Siglecg	protein_coding	3.31253e-10	8.02379e-08	-0.52106	0.0829264	7.2858	0.0859312	0.000975691	0.0046246	0.00933949	0.00933949	21.72	18.8505	19.1644	12.0535	10.7592	12.1635
ENSMUST00000038038.7	ENSMUSG00000072620	Slfn2	protein_coding	3.61505e-10	8.7119e-08	0.807753	0.128832	6.3	0.215657	0.00256649	0.0223301	0.0133696	0.0223301	6.41953	7.46642	6.21255	13.6646	18.8355	12.6084
ENSMUST00000064889.12	ENSMUSG00000023942	Slc29a1	protein_coding	3.64797e-10	8.74661e-08	0.820159	0.13084	6.71742	0.221544	0.0145609	0.0101217	0.0111179	0.0111179	6.51973	7.74072	8.7685	20.3078	15.5674	15.8476
ENSMUST00000094103.3	ENSMUSG00000070407	Hs3st3b1	protein_coding	3.70189e-10	8.78669e-08	-0.742028	0.118419	5.81	0.18201	0.00306364	0.0179711	0.0164169	0.0179711	3.16265	3.14049	2.18149	1.37001	1.25449	1.30552
ENSMUST00000040284.5	ENSMUSG00000036299	BC031181	protein_coding	3.68815e-10	8.78669e-08	-0.576392	0.0919772	7.26025	0.10982	0.00125077	0.0114389	0.00940299	0.0114389	76.028	63.92	62.8253	42.275	34.6876	34.6249
ENSMUST00000026795.12	ENSMUSG00000025701	Alox5	protein_coding	3.75067e-10	8.85796e-08	-0.999456	0.159554	5.19838	0.308305	0.0135524	-0.00276291	0.0246337	0.0246337	3.28804	2.83151	2.51867	1.10495	0.98147	1.04218
ENSMUST00000058096.13	ENSMUSG00000057406	Nsd2	protein_coding	3.82147e-10	8.98026e-08	0.628589	0.100395	7.09448	0.128849	0.00528135	0.00760869	0.00983741	0.00983741	5.78468	4.63975	6.0545	10.4672	10.1556	9.69169
ENSMUST00000166044.2	ENSMUSG00000003779	Kif20a	protein_coding	3.87736e-10	9.0665e-08	0.612324	0.0978327	7.83954	0.119742	0.0061716	0.00290371	0.00818526	0.00818526	16.6276	16.373	19.7692	29.5137	34.2686	31.9195
ENSMUST00000113687.7	ENSMUSG00000032366	Tpm1	protein_coding	4.06282e-10	9.45335e-08	-0.798074	0.127659	6.96986	0.210633	0.00809894	0.0163464	0.0102032	0.0163464	47.9627	44.967	64.756	21.5245	22.5206	24.5362
ENSMUST00000034232.2	ENSMUSG00000031780	Ccl17	protein_coding	4.3931e-10	1.01717e-07	-1.36955	0.219501	4.2691	0.567605	0.0177869	-0.0116552	0.0544842	0.0544842	13.0326	11.448	12.6173	2.82133	3.30488	2.98555
ENSMUST00000105999.8	ENSMUSG00000028776	Tinagl1	protein_coding	4.45597e-10	1.0267e-07	-0.640035	0.102617	9.2326	0.13553	0.000122298	0.0156729	0.00758104	0.0156729	229.464	176.252	168.026	100.436	89.8751	107.244
ENSMUST00000029671.8	ENSMUSG00000028037	Ifi44	protein_coding	5.45962e-10	1.25184e-07	3.10991	0.501172	3.50718	3.20288	0.0914863	0.285273	0.168131	0.285273	0.0450227	0.0590767	0.181112	1.22254	3.41981	1.57535
ENSMUST00000102678.4	ENSMUSG00000067212	H2-T23	protein_coding	5.54496e-10	1.26226e-07	1.07228	0.172869	5.03399	0.380798	0.0097573	0.0350685	0.0275667	0.0350685	2.06246	1.65984	1.63264	5.535	6.50171	3.77437
ENSMUST00000060101.9	ENSMUSG00000051579	Tceal8	protein_coding	5.55848e-10	1.26226e-07	-0.681989	0.109954	8.19338	0.154041	0.000336765	0.0177982	0.0077375	0.0177982	159.639	148.922	156.578	62.0101	83.3435	88.3114
ENSMUST00000146468.3	ENSMUSG00000050335	Lgals3	protein_coding	5.65688e-10	1.27845e-07	0.658329	0.106187	7.71089	0.14355	0.00170635	0.0152072	0.00840292	0.0152072	44.3352	42.9816	44.2112	100.062	70.1725	83.0976
ENSMUST00000019354.10	ENSMUSG00000019210	Atp6v1e1	protein_coding	7.06386e-10	1.58431e-07	-0.445926	0.072336	8.34267	0.0646476	0.000237645	0.00600293	0.00761111	0.00761111	140.513	119.784	123.403	78.4926	76.8826	85.9983
ENSMUST00000071135.5	ENSMUSG00000062591	Tubb4a	protein_coding	7.07729e-10	1.58431e-07	-0.755529	0.122564	5.62991	0.188003	0.00436876	0.0165761	0.0181642	0.0181642	4.85492	4.09511	5.50419	2.33968	1.9554	2.3978
ENSMUST00000169169.7	ENSMUSG00000091898	Tnnc1	protein_coding	7.28891e-10	1.62398e-07	-1.04704	0.169982	4.8877	0.349151	0.0127317	0.012601	0.0306091	0.0306091	11.8879	9.07897	9.67467	3.06204	4.27577	3.28086
ENSMUST00000042665.8	ENSMUSG00000034422	Parp14	protein_coding	8.08136e-10	1.79209e-07	1.88466	0.306781	4.38274	1.17852	0.0406254	0.100547	0.047942	0.100547	0.10287	0.113832	0.145431	0.731227	1.35077	0.492668
ENSMUST00000173492.8	ENSMUSG00000079553	Kifc1	protein_coding	8.15996e-10	1.80106e-07	0.473302	0.0770626	7.80311	0.0724852	0.000664189	0.00593674	0.00824379	0.00824379	22.8853	19.6885	22.4474	36.9556	32.7386	33.4959
ENSMUST00000070532.7	ENSMUSG00000028773	Fabp3	protein_coding	8.35351e-10	1.82671e-07	-0.774286	0.126145	6.18023	0.198951	0.00216053	0.0217083	0.0140329	0.0217083	35.7029	27.6093	25.3952	12.3099	12.149	15.8103
ENSMUST00000017637.12	ENSMUSG00000017493	Igfbp4	protein_coding	8.34038e-10	1.82671e-07	0.985293	0.160515	8.4174	0.322159	0.000492998	0.0381548	0.00756119	0.0381548	18.1883	18.7021	20.5437	68.1017	47.1295	40.8871
ENSMUST00000033450.2	ENSMUSG00000031119	Gpc4	protein_coding	8.50892e-10	1.85212e-07	-0.504201	0.0821826	8.88155	0.0843703	0.000149214	0.00998175	0.0074456	0.00998175	104.335	116.608	91.1199	68.5461	59.7848	57.0281
ENSMUST00000133316.7	ENSMUSG00000029177	Cenpa	nonsense_mediated_decay	8.64946e-10	1.87408e-07	0.568732	0.0927402	7.1155	0.107358	0.0022521	0.010649	0.00977957	0.010649	33.1343	28.6516	24.0135	53.4452	45.1593	49.3127
ENSMUST00000018644.2	ENSMUSG00000018500	Adora2b	protein_coding	9.44737e-10	2.03761e-07	0.685212	0.111991	5.89653	0.145865	0.0030534	0.00320882	0.0157595	0.0157595	4.45613	4.6407	3.75178	8.60111	7.83166	8.64788
ENSMUST00000051937.8	ENSMUSG00000049907	Rasl11b	protein_coding	1.00304e-09	2.15353e-07	-0.641104	0.104945	6.16219	0.129897	0.00238748	0.00585311	0.0141329	0.0141329	10.5004	11.7138	9.40058	5.846	5.66	4.92104
ENSMUST00000026318.14	ENSMUSG00000025283	Sat1	protein_coding	1.02168e-09	2.18363e-07	-0.84048	0.137649	8.27039	0.234659	0.000418365	0.0280023	0.00766782	0.0280023	224.86	177.218	167.183	68.2469	76.6832	98.1743
ENSMUST00000068056.11	ENSMUSG00000019432	Ddx39b	protein_coding	1.03559e-09	2.20339e-07	0.507755	0.0831864	8.96334	0.0856485	0.000188784	0.0101912	0.00745976	0.0101912	96.3477	95.4877	113.576	180.519	154.838	165.579
ENSMUST00000098942.5	ENSMUSG00000074476	Spc24	protein_coding	1.04484e-09	2.21309e-07	0.757139	0.124072	6.42306	0.190451	0.00248013	0.0206107	0.0126559	0.0206107	8.84603	8.78021	10.8001	24.0505	18.8902	17.3657
ENSMUST00000109728.7	ENSMUSG00000027488	Snta1	protein_coding	1.09764e-09	2.31455e-07	0.521951	0.0856425	6.9792	0.0896912	0.000827708	0.00912415	0.0101743	0.0101743	10.1545	9.26345	10.3602	18.7296	14.8799	16.1888
ENSMUST00000071812.10	ENSMUSG00000028068	Iqgap3	protein_coding	1.10896e-09	2.31773e-07	0.520375	0.085407	7.47623	0.0862738	0.00205957	0.00423637	0.00888197	0.00888197	5.31641	6.2082	6.4677	10.2593	9.71036	9.84563
ENSMUST00000076922.5	ENSMUSG00000030921	Trim30a	protein_coding	1.10544e-09	2.31773e-07	2.07025	0.339754	3.74569	1.38077	0.0571949	0.0615417	0.115954	0.115954	0.0998779	0.15137	0.14404	0.796431	1.74845	0.80836
ENSMUST00000180086.2	ENSMUSG00000096210	H1f0	protein_coding	1.14857e-09	2.38993e-07	0.468182	0.0769117	7.73126	0.0719467	0.000506708	0.00722898	0.0083664	0.0083664	24.4785	25.7118	25.0633	44.5847	39.9023	34.9554
ENSMUST00000020220.14	ENSMUSG00000020032	Nuak1	protein_coding	1.15992e-09	2.40297e-07	-0.434289	0.0713623	8.70736	0.05818	0.000188888	0.00180859	0.00744997	0.00744997	37.6426	37.3063	34.648	24.8429	22.8366	22.5155
ENSMUST00000060501.4	ENSMUSG00000044303	Cdkn2a	protein_coding	1.17193e-09	2.41724e-07	-1.7381	0.285682	5.39918	1.00423	0.0138977	0.108524	0.02143	0.108524	29.8227	17.0986	16.2366	2.90478	2.75593	5.36269
ENSMUST00000077960.6	ENSMUSG00000056116	H2-T22	protein_coding	1.18929e-09	2.44239e-07	0.730174	0.120061	6.68799	0.165546	0.0103771	-0.0033771	0.0112449	0.0112449	8.92869	9.14338	10.1544	20.7068	19.3592	17.6187
ENSMUST00000098911.9	ENSMUSG00000074457	S100a16	protein_coding	1.22069e-09	2.49602e-07	0.63411	0.104337	6.53084	0.133451	0.00431037	0.0117179	0.012019	0.012019	11.838	12.1801	14.874	26.8666	23.459	21.9235
ENSMUST00000034650.14	ENSMUSG00000032135	Mcam	protein_coding	1.24318e-09	2.53106e-07	-0.458689	0.0755097	8.23309	0.0667135	0.000852199	0.00364121	0.00770037	0.00770037	39.581	45.0766	43.2891	28.6719	26.3688	25.0144
ENSMUST00000130116.1	ENSMUSG00000063531	Sema3e	retained_intron	1.40479e-09	2.83563e-07	-0.694494	0.114699	6.21392	0.146833	0.00588692	-0.00321662	0.0138469	0.0138469	4.29459	4.51557	3.86366	2.11888	2.09697	2.01645
ENSMUST00000102922.9	ENSMUSG00000020471	Pold2	protein_coding	1.40249e-09	2.83563e-07	0.543617	0.089777	7.77358	0.0983277	0.000764217	0.0113256	0.00829302	0.0113256	27.2963	28.9666	34.0481	53.1519	47.5264	52.778
ENSMUST00000172356.7	ENSMUSG00000032625	Thsd7a	protein_coding	1.45596e-09	2.92641e-07	-0.895268	0.147999	5.35338	0.258536	0.0107158	0.0118899	0.0221396	0.0221396	0.896805	1.11031	0.733459	0.396917	0.345188	0.345444
ENSMUST00000222588.1	ENSMUSG00000021585	Cast	protein_coding	1.46243e-09	2.92698e-07	-0.91029	0.1505	6.58215	0.275769	0.0146004	0.0193749	0.011747	0.0193749	7.5392	8.37619	7.22022	2.47443	2.84414	4.02832
ENSMUST00000005019.5	ENSMUSG00000004885	Crabp2	protein_coding	1.4828e-09	2.953e-07	0.616863	0.102024	6.27779	0.11627	0.00211987	0.000523464	0.0134936	0.0134936	13.1545	13.2961	14.0151	25.2633	23.4793	25.3779
ENSMUST00000041369.7	ENSMUSG00000037104	Socs5	protein_coding	1.48794e-09	2.953e-07	0.468865	0.0775539	7.70483	0.0719797	0.000607984	0.00692868	0.00841394	0.00841394	10.3971	13.0606	10.8465	18.3942	18.6272	16.8069
ENSMUST00000019443.14	ENSMUSG00000047098	Rnf31	protein_coding	1.60072e-09	3.16353e-07	0.688834	0.114161	6.74144	0.157987	0.00249619	0.017053	0.0110179	0.017053	3.60552	4.66952	4.9827	9.39276	8.35807	8.13125
ENSMUST00000031131.10	ENSMUSG00000029223	Uchl1	protein_coding	1.62258e-09	3.19338e-07	-0.699048	0.115896	7.80269	0.162719	0.00177692	0.0183709	0.00824447	0.0183709	108.631	78.1101	84.2534	48.5467	39.4097	44.0836
ENSMUST00000150290.8	ENSMUSG00000050335	Lgals3	protein_coding	1.69206e-09	3.31629e-07	0.592142	0.0982823	7.25293	0.1064	0.00506781	-0.00355481	0.00942131	0.00942131	23.2848	23.76	23.1479	44.1403	41.2125	39.9741
ENSMUST00000059305.16	ENSMUSG00000102252	Snrpn	protein_coding	1.82794e-09	3.5678e-07	-0.562602	0.0935736	6.65294	0.0995356	0.00173096	0.00399323	0.0114031	0.0114031	18.7047	16.2814	16.5648	10.1153	8.97145	9.89829
ENSMUST00000051176.8	ENSMUSG00000047420	Fam180a	protein_coding	1.97856e-09	3.84589e-07	1.08587	0.180992	4.62472	0.387791	0.0112902	0.0312798	0.0378469	0.0378469	0.868813	1.29864	1.44535	3.85522	3.44287	3.06932
ENSMUST00000103032.10	ENSMUSG00000020782	Llgl2	protein_coding	1.98709e-09	3.84665e-07	-0.934023	0.1557	6.62294	0.290811	0.00244205	0.0339217	0.0115446	0.0339217	10.2402	8.18541	6.77611	2.86033	2.91681	4.00118
ENSMUST00000142734.7	ENSMUSG00000050335	Lgals3	protein_coding	2.00382e-09	3.86321e-07	0.856258	0.142769	6.00439	0.237652	0.0155266	0.00659622	0.015048	0.015048	4.70853	5.40146	5.96856	13.4878	10.434	13.6115
ENSMUST00000113585.8	ENSMUSG00000033174	Mgll	protein_coding	2.10239e-09	4.03675e-07	-0.469347	0.0783591	7.69285	0.0689035	0.000774318	0.00274753	0.00843591	0.00843591	19.7069	18.8512	20.6089	12.9734	11.8244	11.7958
ENSMUST00000170086.7	ENSMUSG00000037321	Tap1	protein_coding	2.28642e-09	4.37233e-07	0.678965	0.113615	6.59022	0.153788	0.00205565	0.0173068	0.011706	0.0173068	4.59233	4.78935	4.26388	10.4806	9.25375	7.14677
ENSMUST00000058418.7	ENSMUSG00000050822	Slc29a4	protein_coding	2.39105e-09	4.55398e-07	-0.694379	0.116336	5.75399	0.150033	0.00340372	0.00332607	0.0168974	0.0168974	4.21537	4.10606	3.86287	1.96341	1.8236	2.25885
ENSMUST00000103213.9	ENSMUSG00000020692	Nle1	protein_coding	2.41048e-09	4.57256e-07	0.502021	0.0841272	7.19454	0.0809151	0.0010462	0.00558803	0.00956988	0.00956988	15.0016	14.6054	15.9871	23.8794	23.244	27.4794
ENSMUST00000036355.12	ENSMUSG00000033149	Phldb2	protein_coding	2.65394e-09	5.01426e-07	-0.689101	0.115782	8.67849	0.158545	0.000438874	0.0196695	0.00745522	0.0196695	39.7719	52.7261	41.9881	18.5597	24.3985	23.6317
ENSMUST00000117299.8	ENSMUSG00000076437	Selenoh	protein_coding	2.81779e-09	5.30261e-07	0.514659	0.0866155	7.40398	0.0843523	0.00220142	0.0039113	0.00905196	0.00905196	67.8497	56.2199	62.4562	103.161	96.6325	106.251
ENSMUST00000161779.7	ENSMUSG00000061436	Hipk2	protein_coding	3.16612e-09	5.93446e-07	-0.760038	0.128325	6.92592	0.193058	0.00203452	0.0226666	0.0103435	0.0226666	4.31233	6.47706	4.79429	2.2083	2.665	2.258
ENSMUST00000000188.11	ENSMUSG00000000184	Ccnd2	protein_coding	3.27904e-09	6.07382e-07	-0.476891	0.080597	10.4197	0.0713099	2.98976e-05	0.00382302	0.00971393	0.00971393	184.992	202.076	199.022	109.902	128.786	121.602
ENSMUST00000025254.8	ENSMUSG00000024395	Lims2	protein_coding	3.27141e-09	6.07382e-07	-0.540803	0.0913926	6.73476	0.0908282	0.00148354	0.00237609	0.0110454	0.0110454	17.6258	15.1058	14.9277	9.18643	9.19464	8.87932
ENSMUST00000015435.10	ENSMUSG00000015291	Gdi1	protein_coding	3.2788e-09	6.07382e-07	-0.440993	0.0745299	8.08591	0.0612058	0.000481069	0.00309828	0.00785098	0.00785098	46.2863	41.8307	43.6707	29.1583	26.3702	28.7879
ENSMUST00000065086.5	ENSMUSG00000052957	Gas1	protein_coding	3.40649e-09	6.28524e-07	1.45137	0.245549	6.43123	0.704295	0.00188297	0.0885587	0.0126063	0.0885587	2.42407	3.56032	2.58109	17.4433	11.8523	8.17398
ENSMUST00000090779.3	ENSMUSG00000070392	Gm20634	lncRNA	3.58658e-09	6.59178e-07	-0.816235	0.138293	5.7001	0.222822	0.00531458	0.0233729	0.0174098	0.0233729	5.37509	4.42678	3.24467	1.89993	1.80267	1.89029
ENSMUST00000082122.13	ENSMUSG00000027203	Dut	protein_coding	3.65419e-09	6.69001e-07	0.474196	0.080384	7.44143	0.0751349	0.000729852	0.00886565	0.00896253	0.00896253	42.5152	38.5207	49.0922	68.6587	68.3971	67.9633
ENSMUST00000029482.15	ENSMUSG00000027883	Gpsm2	protein_coding	3.67124e-09	6.69526e-07	0.605298	0.102621	6.38468	0.117006	0.0029122	0.00595059	0.0128845	0.0128845	3.45153	4.06053	3.69376	7.20617	7.20081	5.87106
ENSMUST00000066295.3	ENSMUSG00000049265	Kcnk3	protein_coding	3.88225e-09	7.02582e-07	1.47172	0.249904	4.34596	0.724729	0.0139261	0.079752	0.049906	0.079752	0.291498	0.172718	0.284591	1.50472	0.931037	0.846715
ENSMUST00000006900.6	ENSMUSG00000006717	Acot13	protein_coding	3.87088e-09	7.02582e-07	-0.724308	0.12298	6.3831	0.175535	0.00196137	0.0207249	0.0128938	0.0207249	55.3626	41.254	44.4199	18.5571	23.59	24.7795
ENSMUST00000097921.9	ENSMUSG00000028551	Cdkn2c	protein_coding	4.0989e-09	7.38959e-07	0.990671	0.168477	5.42386	0.32849	0.00868103	0.0338957	0.0210506	0.0338957	1.23511	2.04375	1.43911	4.75189	4.06534	3.55291
ENSMUST00000029183.2	ENSMUSG00000027654	Fam83d	protein_coding	4.4817e-09	8.049e-07	0.511171	0.0871509	6.94864	0.0875031	0.00105497	0.010338	0.0102701	0.010338	10.2844	10.4666	9.22631	19.3388	15.4126	14.8792
ENSMUST00000115637.7	ENSMUSG00000039231	Suv39h1	protein_coding	4.62323e-09	8.27172e-07	0.549507	0.0937694	7.16188	0.0943124	0.00353389	0.0011223	0.00965516	0.00965516	9.24847	10.5453	10.4675	17.5673	16.1849	17.9653
ENSMUST00000032508.10	ENSMUSG00000030357	Fkbp4	protein_coding	4.65481e-09	8.2968e-07	0.425906	0.0726918	9.49019	0.0594467	0.000117455	0.0061675	0.00780868	0.00780868	140.927	122.894	131.519	207.095	182.273	210.109
ENSMUST00000021277.5	ENSMUSG00000020897	Aurkb	protein_coding	4.93184e-09	8.75753e-07	0.568659	0.0972157	6.83754	0.102754	0.00352881	0.00364825	0.0106475	0.0106475	9.97349	9.94305	10.9552	19.4413	18.4278	16.0963
ENSMUST00000030840.3	ENSMUSG00000028989	Angptl7	protein_coding	5.08431e-09	8.99447e-07	1.34529	0.230185	4.27252	0.593399	0.0252124	0.0378561	0.0542656	0.0542656	0.348305	0.661478	0.464552	2.0339	1.50391	1.97596
ENSMUST00000110457.7	ENSMUSG00000022272	Myo10	protein_coding	5.18015e-09	9.12982e-07	-0.579399	0.0991904	7.87243	0.112517	0.00136438	0.0133937	0.00813446	0.0133937	9.83133	13.8484	10.8013	6.21207	6.62539	6.10803
ENSMUST00000092167.6	ENSMUSG00000020154	Ptprb	protein_coding	5.5642e-09	9.77025e-07	-1.38608	0.237775	4.71573	0.644208	0.0284712	0.0563346	0.0350103	0.0563346	0.425928	0.665557	0.543526	0.174245	0.147538	0.0880413
ENSMUST00000021933.7	ENSMUSG00000021477	Ctsl	protein_coding	5.73247e-09	1.00284e-06	-0.417475	0.0716772	8.72582	0.058243	0.000259145	0.00718745	0.00744729	0.00744729	137.635	119.922	119.282	73.5993	87.8246	83.8776
ENSMUST00000039665.7	ENSMUSG00000032783	Troap	protein_coding	5.81528e-09	1.01358e-06	0.668193	0.114771	5.97443	0.145421	0.00452241	0.0098228	0.0152361	0.0152361	2.74189	3.75948	3.13544	6.5976	5.90341	5.96751
ENSMUST00000001156.7	ENSMUSG00000001128	Cfp	protein_coding	5.85178e-09	1.01619e-06	0.881621	0.151457	5.0922	0.251415	0.00792717	0.0148707	0.0264816	0.0264816	1.81925	1.5405	1.91023	4.35991	4.85115	3.449
ENSMUST00000105966.1	ENSMUSG00000018819	Lsp1	protein_coding	6.41659e-09	1.11019e-06	0.879713	0.15153	7.49662	0.259722	0.00378897	0.0306532	0.00883593	0.0306532	19.2019	18.9822	27.6027	58.9234	49.1996	46.8379
ENSMUST00000226650.1	ENSMUSG00000040618	Pck2	protein_coding	6.75945e-09	1.16524e-06	0.590507	0.101868	7.05162	0.111689	0.00560708	0.0032425	0.00995851	0.00995851	12.7123	11.0602	13.3543	23.7062	21.0448	21.2662
ENSMUST00000085658.4	ENSMUSG00000066607	Insyn1	protein_coding	6.88065e-09	1.18182e-06	0.559487	0.0965663	6.68226	0.099679	0.00271734	0.00449676	0.0112702	0.0112702	7.35788	6.52344	7.05405	13.3788	11.0999	11.968
ENSMUST00000093937.2	ENSMUSG00000017499	Cdc6	protein_coding	7.01918e-09	1.20125e-06	0.619701	0.107021	6.31977	0.127172	0.00392204	0.0110322	0.0132582	0.0132582	4.09743	4.3921	5.54437	8.94352	8.56618	8.04204
ENSMUST00000106663.1	ENSMUSG00000038296	Galnt18	protein_coding	7.26966e-09	1.23962e-06	-0.414598	0.0716731	8.57501	0.0572493	0.000220962	0.00688132	0.00748458	0.00748458	67.895	65.7207	72.7615	49.1017	45.5971	40.4574
ENSMUST00000032491.14	ENSMUSG00000030341	Tnfrsf1a	protein_coding	7.47943e-09	1.2708e-06	0.468539	0.0810651	8.22399	0.0737445	0.000512358	0.00934496	0.00770865	0.00934496	34.2928	37.7069	38.3088	66.4031	55.6634	53.1564
ENSMUST00000100220.4	ENSMUSG00000039660	Spout1	protein_coding	7.63938e-09	1.27957e-06	0.496694	0.0859894	7.19082	0.0796299	0.00151177	0.00551113	0.0095795	0.0095795	16.0695	14.1549	15.5408	27.3682	23.2192	23.7315
ENSMUST00000041266.10	ENSMUSG00000038552	Fndc4	protein_coding	7.60073e-09	1.27957e-06	0.981597	0.169912	5.41388	0.302196	0.0221015	-0.00568199	0.0212038	0.0212038	2.6198	2.40776	2.96852	6.62727	6.50546	8.11122
ENSMUST00000020174.6	ENSMUSG00000019998	Stx7	protein_coding	7.58134e-09	1.27957e-06	-0.470374	0.0814146	7.36982	0.0742546	0.000808172	0.00904074	0.00913434	0.00913434	28.8726	24.7906	23.7833	14.1524	16.4858	17.0058
ENSMUST00000087328.3	ENSMUSG00000091971	Hspa1a	protein_coding	7.61351e-09	1.27957e-06	0.603458	0.104462	6.29617	0.11518	0.0029776	0.00443707	0.013391	0.013391	3.97798	3.67031	3.03	6.56755	6.43129	6.23881
ENSMUST00000051209.10	ENSMUSG00000002265	Peg3	protein_coding	7.92654e-09	1.31369e-06	-0.772306	0.133848	8.24384	0.200435	0.000486973	0.026386	0.00769076	0.026386	16.7919	22.4285	17.2106	8.21853	10.362	7.19633
ENSMUST00000006559.13	ENSMUSG00000035274	Tpbg	protein_coding	7.89879e-09	1.31369e-06	1.14673	0.19872	6.16356	0.440132	0.0451089	0.0119338	0.0141253	0.0141253	2.4968	1.59359	2.809	7.63843	7.31258	6.01931
ENSMUST00000010239.5	ENSMUSG00000010095	Slc3a2	protein_coding	7.8759e-09	1.31369e-06	0.425867	0.0737932	8.38204	0.0560716	0.000584435	0.00149398	0.00758371	0.00758371	51.4704	56.805	53.2339	85.6404	80.0289	79
ENSMUST00000087623.12	ENSMUSG00000024299	Adamts10	protein_coding	8.11942e-09	1.34095e-06	-0.524872	0.0910294	7.04317	0.0878841	0.00244661	0.00409947	0.00998293	0.00998293	10.4357	8.97355	8.2488	5.65337	5.17695	5.33271
ENSMUST00000020522.8	ENSMUSG00000020277	Pfkl	protein_coding	8.2247e-09	1.35361e-06	0.411738	0.0714353	8.67409	0.0551578	0.000198372	0.00517581	0.00745613	0.00745613	31.5774	31.3913	34.5996	51.9684	45.3673	48.7788
ENSMUST00000059206.7	ENSMUSG00000032322	Pstpip1	protein_coding	8.71933e-09	1.43003e-06	-0.627321	0.109025	6.05007	0.129061	0.00305743	0.0106943	0.0147722	0.0147722	9.0523	7.19474	9.00599	4.32869	4.11263	4.79764
ENSMUST00000027247.10	ENSMUSG00000026078	Pdcl3	protein_coding	9.08659e-09	1.48511e-06	-0.557241	0.0969628	6.66185	0.104437	0.00242311	0.0116796	0.0113621	0.0116796	8.63396	7.41384	8.12216	3.86514	5.15471	4.69445
ENSMUST00000107723.8	ENSMUSG00000053801	Grwd1	protein_coding	9.14179e-09	1.48898e-06	0.424641	0.0739029	8.19448	0.0598192	0.000456029	0.00669796	0.00773644	0.00773644	42.4239	38.4252	41.978	63.1149	55.864	67.3842
ENSMUST00000088248.12	ENSMUSG00000001403	Ube2c	protein_coding	9.58154e-09	1.55524e-06	0.418131	0.0728708	8.33518	0.0540307	0.000348647	0.00162716	0.00761659	0.00761659	121.492	117.188	119.914	187.183	184.382	168.072
ENSMUST00000108593.7	ENSMUSG00000018559	Ctdnep1	protein_coding	9.73575e-09	1.57486e-06	0.416571	0.0726332	8.38588	0.0537104	0.000332203	0.00173153	0.00758116	0.00758116	62.263	61.4226	57.8983	96.1082	85.5689	91.2159
ENSMUST00000081387.10	ENSMUSG00000017716	Birc5	protein_coding	1.07722e-08	1.73656e-06	0.44717	0.0782026	7.61842	0.0671478	0.0005948	0.00835447	0.00857867	0.00857867	56.2784	55.6931	66.174	97.0542	92.9416	84.6645
ENSMUST00000102903.7	ENSMUSG00000038729	Pakap	protein_coding	1.08722e-08	1.74411e-06	-0.466032	0.0815235	8.41797	0.0703251	0.00240829	0.00405353	0.00756084	0.00756084	25.8371	23.9411	23.373	13.5657	16.8333	15.1269
ENSMUST00000136359.7	ENSMUSG00000000031	H19	lncRNA	1.08928e-08	1.74411e-06	1.07525	0.188105	12.1056	0.389307	1.15845e-05	0.0530637	0.0210229	0.0530637	936.389	1228.18	1501.87	4316.85	3462.88	2849.78
ENSMUST00000029771.12	ENSMUSG00000028128	F3	protein_coding	1.10136e-08	1.75749e-06	-0.537095	0.0939909	7.94185	0.0971424	0.000439612	0.0128118	0.0080336	0.0128118	72.308	66.1013	55.2644	33.004	39.6693	38.2075
ENSMUST00000020153.9	ENSMUSG00000019977	Hbs1l	protein_coding	1.14487e-08	1.82077e-06	-1.2018	0.210557	5.87739	0.4865	0.0472947	0.0192066	0.0158971	0.0192066	7.87529	7.78902	5.71401	2.46834	2.56778	1.43302
ENSMUST00000078673.13	ENSMUSG00000058656	Samd12	protein_coding	1.20743e-08	1.91381e-06	-1.21471	0.213156	4.50206	0.474935	0.0257313	0.0146212	0.0424218	0.0424218	0.494705	0.685226	0.580202	0.143156	0.225369	0.149518
ENSMUST00000045026.3	ENSMUSG00000002055	Spag5	protein_coding	1.21889e-08	1.91645e-06	0.467133	0.0819953	7.2676	0.0713343	0.000700186	0.00663786	0.00938467	0.00938467	7.14658	8.22424	8.91423	13.2548	12.3824	12.4113
ENSMUST00000121805.8	ENSMUSG00000024501	Dpysl3	protein_coding	1.22126e-08	1.91645e-06	-0.44127	0.0774602	10.1456	0.0646878	5.02915e-05	0.00778971	0.00894984	0.00894984	154.876	174.567	149.876	95.5636	95.3917	114.297
ENSMUST00000112931.7	ENSMUSG00000031274	Col4a5	protein_coding	1.21318e-08	1.91645e-06	-0.840105	0.147442	6.86201	0.2272	0.0220486	-0.00271455	0.0105602	0.0105602	5.36057	7.0821	5.2848	2.34761	2.87686	2.26694
ENSMUST00000058125.8	ENSMUSG00000050071	Bex1	protein_coding	1.22754e-08	1.91992e-06	-1.11048	0.194963	5.07649	0.415563	0.0148135	0.0422022	0.0267686	0.0422022	15.0485	8.79027	9.04174	2.90865	3.41845	4.09778
ENSMUST00000236557.1	ENSMUSG00000024338	Psmb8	retained_intron	1.23718e-08	1.92861e-06	1.80488	0.316951	4.12389	1.09783	0.0848353	0.0658516	0.0654398	0.0658516	0.556203	0.508923	0.693104	4.57062	5.02257	1.93125
ENSMUST00000041197.11	ENSMUSG00000040997	Abhd4	protein_coding	1.25534e-08	1.95048e-06	-0.409613	0.0719626	8.54093	0.0513164	0.000270044	0.000956711	0.00749787	0.00749787	74.1856	70.7983	73.8772	49.271	46.713	47.5021
ENSMUST00000208730.1	ENSMUSG00000039361	Picalm	protein_coding	1.26368e-08	1.957e-06	-0.781264	0.137283	7.76312	0.205728	0.0102497	0.0180202	0.00831084	0.0180202	31.5761	33.4482	33.97	11.4546	18.3876	15.67
ENSMUST00000205208.2	ENSMUSG00000030281	Il17rc	protein_coding	1.26963e-08	1.95924e-06	0.736806	0.129489	5.75614	0.17737	0.00827309	0.0098582	0.0168781	0.0168781	3.83479	3.36535	2.90911	8.07749	6.80693	5.99544
ENSMUST00000235920.1	ENSMUSG00000118181	CAAA01066123.1	lncRNA	1.27342e-08	1.95924e-06	0.684901	0.120378	6.30154	0.15174	0.00837533	0.00539102	0.0133609	0.0133609	20.4984	19.0917	22.1834	47.0377	38.1651	36.7433
ENSMUST00000027931.7	ENSMUSG00000026622	Nek2	protein_coding	1.2938e-08	1.97771e-06	0.495734	0.0871714	6.96752	0.0760785	0.00118772	0.00175349	0.0102106	0.0102106	7.39158	7.36507	7.083	12.799	11.5022	11.0898
ENSMUST00000004684.12	ENSMUSG00000004568	Arhgef18	protein_coding	1.29124e-08	1.97771e-06	-0.462874	0.0813885	7.33236	0.0696859	0.000710897	0.00605169	0.00922524	0.00922524	9.99745	9.83445	8.93993	6.7034	5.58871	5.60459
ENSMUST00000006301.10	ENSMUSG00000029703	Lrwd1	protein_coding	1.34355e-08	2.03401e-06	0.443808	0.0781293	7.66467	0.0652747	0.000667599	0.00706355	0.00848869	0.00848869	17.3859	16.5703	19.4484	27.6609	25.4373	29.1651
ENSMUST00000034285.13	ENSMUSG00000031827	Cotl1	protein_coding	1.34203e-08	2.03401e-06	-0.476819	0.0839378	8.54495	0.0766617	0.000222226	0.0103461	0.00749621	0.0103461	125.893	98.9163	109.434	67.3535	63.7946	73.6136
ENSMUST00000038423.5	ENSMUSG00000033355	Rtp4	protein_coding	1.33574e-08	2.03401e-06	4.79859	0.844609	1.70615	6.94894	0.110415	-0.0591537	0.959632	0.959632	0	0	0	1.21281	1.65424	0.857299
ENSMUST00000108920.8	ENSMUSG00000018899	Irf1	protein_coding	1.35498e-08	2.04476e-06	0.877485	0.154515	6.23045	0.259644	0.00325223	0.0325599	0.0137557	0.0325599	3.56988	4.4079	5.14415	10.6151	12.1451	8.37866
ENSMUST00000030623.7	ENSMUSG00000028820	Sfpq	protein_coding	1.36846e-08	2.05853e-06	0.411595	0.0724985	8.80199	0.0571304	0.000243914	0.00764014	0.00744179	0.00764014	49.1716	52.4784	40.3295	68.3492	69.4841	72.6323
ENSMUST00000068116.12	ENSMUSG00000026305	Lrrfip1	protein_coding	1.38505e-08	2.07687e-06	-0.575655	0.101433	7.17918	0.11176	0.000938509	0.0144945	0.00960977	0.0144945	24.0417	26.1062	24.075	11.585	13.6324	16.3538
ENSMUST00000043172.14	ENSMUSG00000001288	Rarg	protein_coding	1.42889e-08	2.13583e-06	0.521764	0.0920236	7.23917	0.089388	0.0032466	0.00639935	0.00945592	0.00945592	8.23031	10.3716	8.87649	16.5262	14.8026	14.4174
ENSMUST00000111956.8	ENSMUSG00000063506	Arhgap22	protein_coding	1.43473e-08	2.13779e-06	0.621781	0.109677	6.17029	0.12019	0.0039557	0.00130311	0.0140879	0.0140879	3.49507	3.32845	3.54967	6.96015	5.87442	6.33252
ENSMUST00000084116.12	ENSMUSG00000028948	Nol9	protein_coding	1.45499e-08	2.16116e-06	0.428828	0.0756739	7.9555	0.0565152	0.000575047	0.00110896	0.00801476	0.00801476	16.3567	17.7075	16.5355	26.8967	25.0547	24.7543
ENSMUST00000076249.5	ENSMUSG00000062488	Ifit3b	protein_coding	1.49029e-08	2.20666e-06	2.26801	0.400518	3.56535	1.73565	0.0653533	0.175269	0.153835	0.175269	0.0926399	0.21087	0.248863	1.51484	2.86769	1.1066
ENSMUST00000034369.9	ENSMUSG00000031897	Psmb10	protein_coding	1.50325e-08	2.21889e-06	0.726578	0.128344	6.06301	0.178141	0.00379095	0.0209171	0.0146961	0.0209171	6.77529	5.96171	7.38901	15.1454	15.2697	11.0264
ENSMUST00000122064.7	ENSMUSG00000054690	Emcn	protein_coding	1.56077e-08	2.29661e-06	-1.87764	0.332047	3.97689	1.18363	0.0845014	0.0729572	0.0808816	0.0808816	1.84852	1.68061	1.76914	0.135766	0.413113	0.310787
ENSMUST00000067976.8	ENSMUSG00000026626	Ppp2r5a	protein_coding	1.6098e-08	2.3614e-06	0.492317	0.0871445	6.95443	0.0797817	0.00113949	0.00769677	0.0102518	0.0102518	7.10857	7.80132	7.89258	13.4359	12.8919	10.7408
ENSMUST00000005862.8	ENSMUSG00000005718	Tfap4	protein_coding	1.73881e-08	2.54275e-06	0.711143	0.126175	5.60041	0.169513	0.00536502	0.0168796	0.0185152	0.0185152	2.28276	2.10104	2.52384	5.53343	4.68402	3.89506
ENSMUST00000038160.5	ENSMUSG00000036446	Lum	protein_coding	1.75204e-08	2.55358e-06	1.45462	0.258147	4.72304	0.714745	0.0164046	0.0835552	0.0347996	0.0835552	0.540376	0.75654	0.986222	3.46354	4.13768	2.1619
ENSMUST00000220899.1	ENSMUSG00000047832	Cdca4	protein_coding	1.75703e-08	2.55358e-06	0.482283	0.0855967	7.39223	0.0737054	0.00190994	0.00299788	0.00908025	0.00908025	18.7499	17.374	20.022	31.3659	29.6604	28.5177
ENSMUST00000227395.1	ENSMUSG00000022607	Ptk2	protein_coding	1.80001e-08	2.60803e-06	-0.7525	0.133654	5.374	0.185547	0.00497614	0.0146112	0.021819	0.021819	28.2152	24.0611	22.4216	9.6911	11.3512	13.5751
ENSMUST00000098763.6	ENSMUSG00000062127	Cttnbp2nl	protein_coding	1.81074e-08	2.61556e-06	-0.460843	0.0818669	7.7538	0.0708013	0.00172638	0.00713416	0.0083269	0.0083269	16.1875	20.1069	17.1233	9.98562	11.9125	11.2708
ENSMUST00000025399.8	ENSMUSG00000024521	Pmaip1	protein_coding	1.88044e-08	2.70795e-06	-1.37544	0.244625	6.98785	0.63936	0.00201467	0.0877472	0.0101477	0.0877472	30.1692	29.4628	21.4201	4.40142	7.04461	9.42944
ENSMUST00000166873.8	ENSMUSG00000022321	Cdh10	protein_coding	1.9167e-08	2.75178e-06	-1.06609	0.189718	5.18009	0.384158	0.00621334	0.0477761	0.024942	0.0477761	2.80083	3.81411	2.5885	0.908404	0.85243	1.38667
ENSMUST00000034270.16	ENSMUSG00000031812	Map1lc3b	protein_coding	1.92843e-08	2.76022e-06	-0.457351	0.0814037	8.55727	0.0707028	0.000302045	0.0096378	0.00749128	0.0096378	85.265	68.1856	70.112	45.9438	43.4304	49.7906
ENSMUST00000027601.10	ENSMUSG00000026355	Mcm6	protein_coding	1.9818e-08	2.82804e-06	0.40227	0.0716601	8.65846	0.0518924	0.000243137	0.0039395	0.00745961	0.00745961	45.3169	49.6605	52.535	74.5942	73.2315	68.9921
ENSMUST00000115467.10	ENSMUSG00000029552	Tes	protein_coding	1.99879e-08	2.8437e-06	-0.400026	0.0712791	8.74481	0.0539885	0.00017599	0.00730183	0.00744508	0.00744508	102.543	94.0874	91.0428	58.1162	61.8766	70.7332
ENSMUST00000033154.7	ENSMUSG00000030867	Plk1	protein_coding	2.06768e-08	2.93288e-06	0.622499	0.111037	8.45486	0.131047	0.000408702	0.0180851	0.00753947	0.0180851	36.5737	40.9477	50.1638	84.3826	75.7233	74.3223
ENSMUST00000086370.10	ENSMUSG00000026831	1700007K13Rik	protein_coding	2.13145e-08	3.00528e-06	-0.6488	0.115837	5.78523	0.135747	0.00350383	0.0083275	0.0166234	0.0166234	20.8982	17.0375	16.2008	8.44435	9.29166	10.0796
ENSMUST00000034698.8	ENSMUSG00000032180	Tmed1	protein_coding	2.12679e-08	3.00528e-06	0.48487	0.0865628	7.41825	0.0795213	0.000592108	0.0106476	0.00901762	0.0106476	28.6062	23.6842	29.3823	47.1704	42.0476	41.656
ENSMUST00000025681.7	ENSMUSG00000024769	Cdc42bpg	protein_coding	2.14089e-08	3.00961e-06	-0.45403	0.0810738	7.35641	0.0674733	0.000692617	0.00634517	0.00916681	0.00916681	8.49815	8.09653	7.36821	5.58658	4.97231	4.51929
ENSMUST00000055096.4	ENSMUSG00000040219	Ttc12	protein_coding	2.16445e-08	3.0337e-06	-0.644838	0.115184	5.85341	0.137428	0.00382554	0.0120282	0.0160756	0.0160756	4.25391	3.39474	3.526	1.71305	1.87173	2.19709
ENSMUST00000082408.1	ENSMUSG00000064357	mt-Atp6	protein_coding	2.24985e-08	3.14406e-06	-1.31353	0.234911	10.4524	0.583826	0.0110398	0.0717349	0.00981845	0.0717349	4289.05	4581.73	5670.47	848.644	1820.1	1290.49
ENSMUST00000081933.13	ENSMUSG00000049502	Dtx3l	protein_coding	2.34141e-08	3.26237e-06	1.63387	0.292563	5.09822	0.903572	0.0117451	0.116645	0.0263727	0.116645	0.261927	0.481849	0.518015	1.8596	3.01545	1.52641
ENSMUST00000237142.1	ENSMUSG00000024803	Ankrd1	protein_coding	2.37642e-08	3.30141e-06	-1.28003	0.22931	8.61838	0.554641	0.00277033	0.076104	0.00747026	0.076104	194.024	157.817	139.57	31.4922	43.1825	64.5369
ENSMUST00000018113.7	ENSMUSG00000017969	Ptgis	protein_coding	2.44403e-08	3.38537e-06	0.480486	0.0861517	7.51998	0.0715795	0.00234891	0.000550251	0.00878427	0.00878427	18.3033	18.127	19.3394	30.2644	28.0518	30.8261
ENSMUST00000053744.8	ENSMUSG00000046791	Riox1	protein_coding	2.66766e-08	3.68434e-06	0.529149	0.0951373	6.55002	0.0945301	0.00166168	0.0115013	0.011915	0.011915	6.27336	6.91583	5.05086	10.1972	9.31641	10.8906
ENSMUST00000034351.7	ENSMUSG00000031880	Rrad	protein_coding	2.7001e-08	3.71826e-06	0.654905	0.117792	5.70817	0.135773	0.00348286	0.00539587	0.0173295	0.0173295	3.48648	4.08724	3.76787	8.11243	6.70018	6.87005
ENSMUST00000130481.1	ENSMUSG00000087141	Plcxd2	protein_coding	2.74358e-08	3.76716e-06	-0.642009	0.11553	5.80034	0.137254	0.00352455	0.0134768	0.0164964	0.0164964	2.08723	2.03507	1.60824	0.853273	1.08478	1.02683
ENSMUST00000032808.5	ENSMUSG00000030587	2200002D01Rik	protein_coding	2.85907e-08	3.91436e-06	-0.894839	0.161237	6.35423	0.271418	0.00208681	0.036909	0.0130616	0.036909	20.6308	13.882	17.0365	6.3416	5.96883	8.46906
ENSMUST00000031447.11	ENSMUSG00000029484	Anxa3	protein_coding	2.90155e-08	3.96104e-06	-0.462845	0.0834365	9.23374	0.0726217	0.00012881	0.0103137	0.0075818	0.0103137	298.932	245.103	246.222	146.77	168.536	173.04
ENSMUST00000042046.4	ENSMUSG00000034463	Scara3	protein_coding	3.07148e-08	4.18093e-06	0.754644	0.136284	6.10077	0.193134	0.00288641	0.0249734	0.014478	0.0249734	2.02497	2.36983	2.26176	5.82759	4.6229	3.74785
ENSMUST00000184142.7	ENSMUSG00000072674	Plac9b	protein_coding	3.124e-08	4.2402e-06	0.657728	0.118845	6.98655	0.146731	0.0020349	0.0191513	0.0101517	0.0191513	19.472	24.4404	22.2074	49.3531	42.1791	35.1351
ENSMUST00000031678.9	ENSMUSG00000029669	Tspan12	protein_coding	3.15864e-08	4.27493e-06	-1.3482	0.243692	4.67983	0.597269	0.0529984	0.0119695	0.0360801	0.0360801	3.53498	3.01187	2.43256	0.554266	1.0533	0.72831
ENSMUST00000021164.3	ENSMUSG00000020808	Pimreg	protein_coding	3.24585e-08	4.38041e-06	0.442569	0.0800648	7.43041	0.0627877	0.000626984	0.00440751	0.00898858	0.00898858	23.7955	23.1246	26.3349	38.5449	35.6564	38.0972
ENSMUST00000018755.9	ENSMUSG00000020388	Pdlim4	protein_coding	3.28516e-08	4.42083e-06	0.577713	0.104554	6.13051	0.104507	0.00208742	0.00338864	0.0143098	0.0143098	9.29656	7.84558	8.00398	15.6576	14.8138	13.707
ENSMUST00000096014.4	ENSMUSG00000071528	Atp5md	protein_coding	3.38655e-08	4.54433e-06	-0.452188	0.0819155	8.0892	0.0693944	0.000268254	0.00979696	0.00784722	0.00979696	629.107	563.43	633.154	331.151	397.993	402.834
ENSMUST00000109526.1	ENSMUSG00000067786	Nnat	protein_coding	3.43557e-08	4.59704e-06	-0.96546	0.174976	6.76823	0.316374	0.00414389	0.0417813	0.01091	0.0417813	38.0551	31.0287	33.2025	9.82957	12.5364	17.3244
ENSMUST00000046497.7	ENSMUSG00000040658	Dnph1	protein_coding	3.4903e-08	4.65709e-06	0.553719	0.100405	6.42743	0.1017	0.00249219	0.0096567	0.0126294	0.0126294	10.3046	12.1215	13.5221	20.65	19.9578	20.5838
ENSMUST00000058142.3	ENSMUSG00000045539	Sprr3	protein_coding	3.52774e-08	4.69378e-06	-1.64201	0.297843	4.035	0.915309	0.0380582	0.0950075	0.0741988	0.0950075	3.34517	2.87643	4.25134	0.372076	0.771718	0.932015
ENSMUST00000039178.11	ENSMUSG00000026725	Tnn	protein_coding	3.66816e-08	4.83972e-06	1.55326	0.282096	5.3343	0.819274	0.00909348	0.110274	0.0224378	0.110274	0.285406	0.482738	0.54124	2.90338	1.77539	1.50017
ENSMUST00000214601.1	ENSMUSG00000001349	Cnn1	protein_coding	3.65743e-08	4.83972e-06	-0.758907	0.137817	7.38899	0.195574	0.00295417	0.025536	0.00908807	0.025536	59.8436	51.8336	58.8951	21.0106	26.4852	32.5436
ENSMUST00000115126.8	ENSMUSG00000022791	Tnk2	protein_coding	3.66375e-08	4.83972e-06	0.581751	0.105651	7.90232	0.114925	0.00419157	0.0125517	0.00808999	0.0125517	12.0242	11.5332	8.63517	19.9342	17.0311	19.6294
ENSMUST00000096249.6	ENSMUSG00000071652	Ints5	protein_coding	3.69123e-08	4.85659e-06	0.415458	0.0754689	7.90039	0.0541003	0.000450508	0.00244792	0.00809282	0.00809282	16.7831	17.1311	17.7856	26.8713	24.2137	26.489
ENSMUST00000107896.9	ENSMUSG00000000275	Trim25	protein_coding	3.78015e-08	4.95977e-06	1.13113	0.205629	6.90936	0.434577	0.00180829	0.0616168	0.0103981	0.0616168	2.09477	3.27867	3.38756	9.45111	10.5889	6.70119
ENSMUST00000022595.7	ENSMUSG00000022018	Rgcc	protein_coding	3.81319e-08	4.98925e-06	0.819031	0.148934	5.18084	0.221411	0.00834261	0.0168666	0.0249293	0.0249293	4.55711	4.78725	3.35509	8.11225	9.42358	10.6238
ENSMUST00000061829.7	ENSMUSG00000051439	Cd14	protein_coding	3.85352e-08	5.02809e-06	1.14059	0.207477	5.22354	0.441942	0.00956087	0.0550094	0.0242156	0.0550094	2.02009	1.31896	2.52032	5.96846	6.4566	5.16395
ENSMUST00000111726.9	ENSMUSG00000040370	Etfrf1	protein_coding	3.94753e-08	5.13658e-06	-0.863162	0.157133	5.14347	0.252308	0.0114654	0.0245263	0.0255709	0.0255709	8.0787	7.10623	7.05705	2.2709	3.75691	3.31289
ENSMUST00000034000.14	ENSMUSG00000031591	Asah1	protein_coding	4.13488e-08	5.36557e-06	-0.514773	0.0938512	7.79088	0.090067	0.00284391	0.0103682	0.00826398	0.0103682	35.9338	41.7102	36.8389	19.0736	25.868	22.9106
ENSMUST00000051064.8	ENSMUSG00000043542	Zc2hc1a	protein_coding	4.2648e-08	5.519e-06	-0.568236	0.103702	6.33304	0.105309	0.00294819	0.00760285	0.0131829	0.0131829	8.46981	7.93204	7.25867	3.85531	4.95023	4.42866
ENSMUST00000038562.8	ENSMUSG00000039911	Spsb1	protein_coding	4.32295e-08	5.56376e-06	-0.440778	0.0804763	7.41253	0.0612103	0.000683261	0.0029725	0.00903138	0.00903138	19.3599	17.1439	17.1165	12.066	10.9453	11.109
ENSMUST00000112498.2	ENSMUSG00000024074	Crim1	protein_coding	4.32034e-08	5.56376e-06	-0.649508	0.118583	7.96052	0.143432	0.000742714	0.0203503	0.00800792	0.0203503	17.5385	23.5282	15.3303	9.43301	9.92039	9.35221
ENSMUST00000107771.11	ENSMUSG00000003868	Ruvbl2	protein_coding	4.38425e-08	5.59692e-06	0.400115	0.0730853	8.7295	0.0544374	0.000287608	0.00772459	0.00744682	0.00772459	72.4181	65.6979	77.2266	108.777	97.5066	111.892
ENSMUST00000020161.9	ENSMUSG00000019987	Arg1	protein_coding	4.37323e-08	5.59692e-06	-1.59971	0.292181	3.89283	0.870169	0.0243969	0.103658	0.0919982	0.103658	3.20563	2.47487	1.53835	0.457777	0.308471	0.640937
ENSMUST00000006544.8	ENSMUSG00000006378	Gcat	protein_coding	4.37513e-08	5.59692e-06	0.537789	0.0982264	6.77298	0.0966015	0.00358137	0.00871389	0.0108913	0.0108913	7.79182	6.84232	7.94519	12.4446	11.3862	14.4119
ENSMUST00000070515.1	ENSMUSG00000022040	Ephx2	protein_coding	4.45752e-08	5.65985e-06	-0.814582	0.148872	5.35541	0.209941	0.0111364	0.00246102	0.0221079	0.0221079	5.22003	4.46554	4.64966	1.77771	2.37272	2.10565
ENSMUST00000023611.6	ENSMUSG00000022894	Adamts5	protein_coding	4.4462e-08	5.65985e-06	-0.647662	0.118356	7.01237	0.14265	0.00106615	0.0199461	0.0100736	0.0199461	4.23354	4.95651	3.88106	2.17998	2.70814	1.90024
ENSMUST00000235069.1	ENSMUSG00000024097	Srsf7	protein_coding	4.51082e-08	5.71217e-06	0.452527	0.0827351	7.80432	0.0696484	0.00112054	0.00914711	0.00824181	0.00914711	57.8246	60.6874	72.7295	93.4528	99.7235	102.458
ENSMUST00000197148.1	ENSMUSG00000097183	Gm17501	lncRNA	4.56397e-08	5.76403e-06	-0.500772	0.0915904	6.75043	0.0775957	0.00160195	0.00135303	0.0109813	0.0109813	42.7035	42.9452	46.4277	27.1743	26.2107	25.4501
ENSMUST00000072119.14	ENSMUSG00000041431	Ccnb1	protein_coding	4.9817e-08	6.27482e-06	0.434795	0.0797502	7.81912	0.0584764	0.00132238	0.000880538	0.00821777	0.00821777	25.2724	26.7443	26.0671	37.5019	42.8418	38.6356
ENSMUST00000046157.9	ENSMUSG00000039286	Fndc3b	protein_coding	5.1386e-08	6.45523e-06	-0.500138	0.0918283	8.04191	0.0846807	0.00474566	0.00730346	0.007903	0.007903	14.2559	18.6955	17.2538	9.69717	10.9628	9.30095
ENSMUST00000202899.3	ENSMUSG00000026879	Gsn	protein_coding	5.25172e-08	6.57984e-06	-0.65205	0.119806	7.06599	0.144775	0.00586922	0.0156609	0.0099174	0.0156609	60.8947	66.183	66.1042	28.9138	30.328	41.2515
ENSMUST00000025444.7	ENSMUSG00000024560	Cxxc1	protein_coding	5.3656e-08	6.70473e-06	0.436332	0.0802266	7.58463	0.0606977	0.00100741	0.00347003	0.00864705	0.00864705	16.5133	14.848	15.8238	25.4351	22.3669	24.7109
ENSMUST00000021592.15	ENSMUSG00000021175	Cdca7l	protein_coding	5.39483e-08	6.72347e-06	0.829338	0.152514	5.16444	0.232805	0.0096821	0.0233991	0.0252087	0.0252087	0.951997	1.14119	1.32666	2.8896	2.82788	2.05899
ENSMUST00000000505.15	ENSMUSG00000029730	Mcm7	protein_coding	5.84203e-08	7.26164e-06	0.512168	0.0944338	8.6801	0.0893963	0.000287771	0.0130889	0.00745489	0.0130889	38.6322	41.6334	47.5574	79.5212	65.665	65.7792
ENSMUST00000020283.4	ENSMUSG00000020086	Macroh2a2	protein_coding	6.01563e-08	7.4578e-06	0.43921	0.0810599	7.40948	0.0597292	0.000817337	0.00150484	0.00903871	0.00903871	16.6766	17.2072	16.9311	27.8083	25.9179	24.5667
ENSMUST00000105846.8	ENSMUSG00000028664	Ephb2	protein_coding	6.05622e-08	7.45994e-06	0.775661	0.143187	5.92483	0.1931	0.0151908	0.000565265	0.0155629	0.0155629	1.60391	1.97859	1.85504	4.48077	3.8661	3.38482
ENSMUST00000046463.9	ENSMUSG00000042535	Gtpbp1	protein_coding	6.06474e-08	7.45994e-06	0.41668	0.0769225	7.76944	0.0552258	0.000575546	0.00334837	0.00830005	0.00830005	13.81	14.2443	14.9719	22.76	20.1182	21.8199
ENSMUST00000023756.11	ENSMUSG00000023015	Racgap1	protein_coding	6.04464e-08	7.45994e-06	0.435326	0.0803559	7.84513	0.0594672	0.00150913	0.00175908	0.00817648	0.00817648	18.9916	20.3571	21.3732	31.3348	32.2119	29.0519
ENSMUST00000016081.12	ENSMUSG00000015937	Macroh2a1	protein_coding	6.2096e-08	7.60391e-06	0.451017	0.0833263	7.58186	0.067161	0.00176215	0.00590815	0.00865275	0.00865275	19.2116	23.2332	23.3461	33.485	32.9347	35.5348
ENSMUST00000131871.7	ENSMUSG00000022884	Eif4a2	nonsense_mediated_decay	6.21397e-08	7.60391e-06	-0.722492	0.133485	6.4742	0.176691	0.0143835	0.0107316	0.0123439	0.0123439	23.0133	17.8695	16.8562	7.83405	9.20515	10.5
ENSMUST00000045633.5	ENSMUSG00000040463	Mybbp1a	protein_coding	6.40432e-08	7.81657e-06	0.417427	0.0771995	10.1151	0.055499	6.338e-05	0.00396826	0.00887625	0.00887625	115.997	122.901	126.852	188.329	169.669	190.832
ENSMUST00000023219.8	ENSMUSG00000022559	Fbxl6	protein_coding	6.4715e-08	7.87822e-06	0.455546	0.0842784	7.144	0.0702825	0.000951633	0.0090805	0.00970263	0.00970263	17.1663	16.1002	14.3924	26.5745	21.53	26.1951
ENSMUST00000019721.6	ENSMUSG00000019577	Pdk4	protein_coding	6.66235e-08	8.0897e-06	-0.67222	0.124484	5.53885	0.149016	0.00392281	0.012892	0.0193216	0.0193216	3.86228	3.09776	2.7026	1.51007	1.62609	1.67048
ENSMUST00000062213.12	ENSMUSG00000025212	Sfxn3	protein_coding	6.9601e-08	8.42957e-06	-0.39956	0.0740996	8.19846	0.0510651	0.000503524	0.00345989	0.00773261	0.00773261	41.7816	40.6392	45.3921	29.0699	27.084	28.4944
ENSMUST00000102528.10	ENSMUSG00000004455	Ppp1cc	protein_coding	7.01443e-08	8.47365e-06	0.395353	0.0733384	8.56411	0.0517823	0.000579139	0.00553489	0.00748863	0.00748863	59.7058	57.1385	48.6836	84.7995	78.4792	78.5411
ENSMUST00000036439.5	ENSMUSG00000039385	Cdh6	protein_coding	7.24696e-08	8.73222e-06	-0.786762	0.146104	5.12751	0.196301	0.00616932	0.00708426	0.0258503	0.0258503	0.98385	0.961837	0.913143	0.454572	0.481856	0.354486
ENSMUST00000075812.10	ENSMUSG00000057406	Nsd2	protein_coding	7.26546e-08	8.73223e-06	0.689552	0.128063	7.02938	0.16083	0.014577	0.00815405	0.0100232	0.0100232	2.70671	4.086	3.09118	6.17318	6.98243	6.02169
ENSMUST00000046384.8	ENSMUSG00000036905	C1qb	protein_coding	7.34245e-08	8.78911e-06	0.890692	0.165477	6.38793	0.270858	0.00233116	0.0387426	0.0128654	0.0387426	8.37665	9.40593	12.7752	25.1892	27.2551	20.4239
ENSMUST00000176745.7	ENSMUSG00000029705	Cux1	protein_coding	7.35e-08	8.78911e-06	-0.55409	0.102945	7.25827	0.103293	0.00648854	0.0074972	0.00940793	0.00940793	15.89	19.8203	19.0964	9.02083	10.5114	11.5261
ENSMUST00000029696.10	ENSMUSG00000028060	Khdc4	protein_coding	7.52351e-08	8.97388e-06	0.530115	0.0985675	6.81503	0.0862644	0.00384303	-0.0013959	0.0107303	0.0107303	7.58555	7.02796	6.647	12.2132	11.5739	11.7717
ENSMUST00000025379.13	ENSMUSG00000024501	Dpysl3	protein_coding	7.54367e-08	8.97526e-06	-0.628147	0.116806	7.34838	0.134743	0.00202545	0.0184399	0.00918629	0.0184399	28.8303	31.4121	24.1263	14.4265	12.7076	17.5253
ENSMUST00000107384.9	ENSMUSG00000030541	Idh2	protein_coding	7.63493e-08	9.05777e-06	0.383919	0.0714194	8.68645	0.0480414	0.000197457	0.00458176	0.00745364	0.00745364	74.3432	77.9438	83.6923	122.124	109.411	111.144
ENSMUST00000048687.10	ENSMUSG00000042712	Tceal9	protein_coding	7.65138e-08	9.05777e-06	-0.981407	0.182582	8.50578	0.328951	0.000295649	0.0497085	0.00751347	0.0497085	366.25	278.56	288.167	83.3548	123.202	142.443
ENSMUST00000115850.1	ENSMUSG00000024304	Cdh2	protein_coding	7.76326e-08	9.16725e-06	-0.474291	0.0882806	7.32644	0.0767023	0.00245052	0.00907014	0.00923967	0.00923967	13.8746	15.9463	17.4409	10.156	10.2118	8.5871
ENSMUST00000024846.12	ENSMUSG00000024048	Myl12a	protein_coding	7.81896e-08	9.20999e-06	-1.34126	0.249711	5.8442	0.614524	0.0383253	0.0552084	0.0161459	0.0552084	32.6136	21.684	17.9659	8.16983	4.30392	6.1441
ENSMUST00000014990.12	ENSMUSG00000014846	Tppp3	protein_coding	8.21215e-08	9.64907e-06	-0.665336	0.124074	7.00035	0.151275	0.00233922	0.0207524	0.0101097	0.0207524	39.0947	32.2828	43.1162	17.029	18.8053	22.1356
ENSMUST00000224069.1	ENSMUSG00000039197	Adk	protein_coding	8.42521e-08	9.87485e-06	-0.756444	0.141186	6.81863	0.195583	0.0125499	0.0173504	0.0107169	0.0173504	26.2325	24.3134	23.3789	9.08202	14.7108	10.981
ENSMUST00000058045.4	ENSMUSG00000044576	Garem2	protein_coding	8.58257e-08	1.00096e-05	-0.625748	0.116865	5.78738	0.127797	0.00388118	0.00902936	0.0166051	0.0166051	3.08634	3.04075	2.38997	1.45473	1.37489	1.66805
ENSMUST00000031004.10	ENSMUSG00000029121	Crmp1	protein_coding	8.57722e-08	1.00096e-05	-0.80063	0.149524	6.52471	0.219131	0.00193474	0.0316012	0.0120529	0.0316012	10.654	8.87094	8.82778	3.98203	3.39076	5.3864
ENSMUST00000099090.6	ENSMUSG00000027806	Tsc22d2	protein_coding	8.72499e-08	1.01506e-05	-0.735	0.137346	6.15051	0.184704	0.00454514	0.0237507	0.0141979	0.0237507	2.05467	2.63269	1.75332	0.902454	1.1826	0.937868
ENSMUST00000144742.5	ENSMUSG00000029177	Cenpa	protein_coding	9.02913e-08	1.04787e-05	0.61421	0.114908	6.42619	0.116723	0.00716873	-0.00273584	0.0126369	0.0126369	9.60039	11.1144	9.5058	19.3202	17.5921	17.8754
ENSMUST00000043839.4	ENSMUSG00000038235	F11r	protein_coding	9.20246e-08	1.06536e-05	-0.600629	0.112439	6.00506	0.114167	0.00392007	0.00350562	0.0150438	0.0150438	6.05638	6.30172	6.21422	3.18578	3.87767	3.06807
ENSMUST00000023612.16	ENSMUSG00000022895	Ets2	protein_coding	9.28247e-08	1.072e-05	0.578551	0.108338	7.03639	0.114501	0.00109931	0.0165064	0.0100027	0.0165064	5.04753	6.9674	6.01411	11.6881	10.4531	9.52712
ENSMUST00000038893.5	ENSMUSG00000040945	Rcc2	protein_coding	9.40595e-08	1.08361e-05	0.445738	0.0835054	9.26132	0.0679726	0.000275084	0.0101846	0.00760088	0.0101846	52.1578	57.5464	63.984	96.4714	84.9326	86.6995
ENSMUST00000072600.6	ENSMUSG00000057123	Gja5	protein_coding	9.76649e-08	1.11968e-05	-1.25957	0.236272	4.55565	0.542945	0.0121066	0.0716302	0.0403031	0.0716302	2.05282	1.71574	1.14521	0.623861	0.384162	0.365348
ENSMUST00000114426.9	ENSMUSG00000037313	Tacc3	protein_coding	9.76642e-08	1.11968e-05	0.403999	0.0757828	7.92244	0.0514347	0.000553602	0.00253393	0.00806094	0.00806094	29.669	29.4062	32.4624	46.7805	43.593	44.4788
ENSMUST00000087566.10	ENSMUSG00000030695	Aldoa	protein_coding	9.82829e-08	1.12133e-05	0.571451	0.107217	7.00728	0.107534	0.00715432	0.00480462	0.0100888	0.0100888	14.2436	13.9679	16.4657	28.2399	23.2213	26.9737
ENSMUST00000044051.5	ENSMUSG00000039016	Timm8b	protein_coding	9.81248e-08	1.12133e-05	-0.516485	0.0968985	7.38433	0.0912942	0.000689516	0.0133945	0.00909931	0.0133945	199.712	154.077	169.879	89.1289	106.415	109.896
ENSMUST00000049537.8	ENSMUSG00000039361	Picalm	protein_coding	1.0121e-07	1.15194e-05	-0.763366	0.143368	7.84536	0.199484	0.0167581	0.0140733	0.00817613	0.0140733	32.24	40.3824	35.3645	12.7078	17.6806	19.7787
ENSMUST00000038446.9	ENSMUSG00000034868	Myl12b	protein_coding	1.04849e-07	1.19049e-05	-0.640876	0.120508	6.18886	0.140643	0.00462793	0.0171554	0.0139852	0.0171554	11.5468	9.63765	7.38104	4.73951	4.75418	5.09632
ENSMUST00000176015.4	ENSMUSG00000029223	Uchl1	retained_intron	1.06561e-07	1.20414e-05	-0.715482	0.134611	6.77381	0.175318	0.0117735	0.0154069	0.010888	0.0154069	48.1706	34.2479	39.3444	18.5388	17.1144	22.954
ENSMUST00000065067.13	ENSMUSG00000052920	Prkg1	protein_coding	1.06369e-07	1.20414e-05	-0.887856	0.167032	6.30529	0.269966	0.00224112	0.0396083	0.0133398	0.0396083	3.75834	4.92213	3.47038	1.27003	2.05697	1.63958
ENSMUST00000114803.8	ENSMUSG00000007570	Fance	protein_coding	1.09475e-07	1.23412e-05	0.78062	0.147003	6.01544	0.192341	0.0174345	-0.00552168	0.0149801	0.0149801	3.22798	3.85365	3.61385	8.06322	6.68664	8.35784
ENSMUST00000032969.13	ENSMUSG00000030726	Pold3	protein_coding	1.10335e-07	1.24085e-05	0.554471	0.104443	6.42954	0.0960892	0.00374604	0.00107601	0.0126166	0.0126166	4.63881	4.4128	4.54732	7.86134	8.51338	7.03218
ENSMUST00000043503.10	ENSMUSG00000038677	Scube3	protein_coding	1.14501e-07	1.28464e-05	-0.90997	0.171626	5.55603	0.28376	0.00761354	0.0365695	0.0190858	0.0365695	1.53815	1.4771	1.40949	0.794149	0.578818	0.43926
ENSMUST00000140842.8	ENSMUSG00000040483	Xaf1	protein_coding	1.1479e-07	1.28484e-05	2.98361	0.562775	3.79091	2.72108	0.367121	-0.303995	0.107952	0.107952	0.514762	0.663916	0.550401	12.1139	15.8338	8.10731
ENSMUST00000027477.14	ENSMUSG00000026259	Ngef	protein_coding	1.16603e-07	1.30203e-05	1.08731	0.205202	4.51213	0.396973	0.0211537	0.0317189	0.0420082	0.0420082	0.416388	0.452325	0.681543	1.75391	1.27596	1.47643
ENSMUST00000022082.7	ENSMUSG00000021591	Glrx	protein_coding	1.18819e-07	1.32366e-05	0.487742	0.0921085	6.69016	0.0761292	0.00149054	0.00446131	0.0112354	0.0112354	15.8765	14.4233	16.3017	27.1458	23.7548	23.8375
ENSMUST00000014684.5	ENSMUSG00000061613	U2af1	protein_coding	1.21084e-07	1.34571e-05	0.400589	0.0756993	8.06591	0.0535671	0.000721356	0.00606057	0.00787421	0.00787421	77.744	75.6892	88.1577	125.221	113.091	116.234
ENSMUST00000029527.5	ENSMUSG00000027919	Lce1g	protein_coding	1.25448e-07	1.39094e-05	-1.57065	0.297169	3.79631	0.793478	0.0254282	0.0413158	0.107036	0.107036	3.90644	3.78156	2.88146	0.891869	0.474273	0.809126
ENSMUST00000113952.9	ENSMUSG00000026917	Wdr5	protein_coding	1.25793e-07	1.3915e-05	0.395023	0.074746	8.05728	0.0488721	0.000495981	0.00207796	0.00788446	0.00788446	24.7446	24.9547	25.9806	39.3437	35.9668	35.5579
ENSMUST00000054197.6	ENSMUSG00000043895	S1pr2	protein_coding	1.27934e-07	1.41188e-05	0.391928	0.0742037	8.04091	0.0477095	0.000355068	0.00167914	0.00790421	0.00790421	10.6127	11.1339	10.8642	16.948	15.611	15.2186
ENSMUST00000017974.12	ENSMUSG00000017830	Dhx58	protein_coding	1.28489e-07	1.41469e-05	2.55233	0.483305	4.20508	2.23462	0.124452	0.225925	0.0588609	0.225925	0.10116	0.219476	0.381614	3.58023	3.64271	1.44711
ENSMUST00000102561.10	ENSMUSG00000028884	Rpa2	protein_coding	1.31142e-07	1.43612e-05	0.451133	0.0854865	7.03946	0.0696565	0.000968201	0.00978197	0.00999372	0.00999372	15.9192	13.1448	16.1784	24.9002	23.2697	21.6259
ENSMUST00000140901.7	ENSMUSG00000020235	Fzr1	protein_coding	1.31185e-07	1.43612e-05	0.485322	0.091966	7.24312	0.0776934	0.00324067	0.00554972	0.00944596	0.00944596	8.84056	8.96875	9.46755	16.6359	14.3172	13.1082
ENSMUST00000233357.1	ENSMUSG00000117098	Gm49909	protein_coding	1.31347e-07	1.43612e-05	-1.0806	0.204777	6.2313	0.400629	0.00901457	0.0538859	0.013751	0.0538859	47.5448	28.6288	28.9864	9.53436	14.6707	10.5094
ENSMUST00000073116.12	ENSMUSG00000025225	Nfkb2	protein_coding	1.3273e-07	1.44789e-05	0.514503	0.0975355	7.30561	0.0878639	0.00497909	0.00558321	0.00929067	0.00929067	9.12836	10.802	9.61787	18.4392	14.6165	15.9503
ENSMUST00000003445.7	ENSMUSG00000003355	Fkbp11	protein_coding	1.36813e-07	1.48899e-05	0.491905	0.0933498	6.66594	0.0782864	0.00172778	0.00539138	0.0113435	0.0113435	29.9971	28.1815	32.6366	51.9436	47.8053	45.6598
ENSMUST00000017743.2	ENSMUSG00000035775	Krt20	protein_coding	1.37333e-07	1.49122e-05	-1.36882	0.259798	5.83035	0.643094	0.00439929	0.0968433	0.0162537	0.0968433	13.3449	10.6312	8.59487	2.17759	2.08994	4.2127
ENSMUST00000098300.5	ENSMUSG00000035704	Alg8	protein_coding	1.39986e-07	1.51654e-05	0.493689	0.0937633	6.6787	0.079151	0.00190122	0.00563925	0.0112861	0.0112861	8.85134	9.81573	10.475	17.0238	15.5543	14.5154
ENSMUST00000065364.4	ENSMUSG00000053119	Chmp3	protein_coding	1.42172e-07	1.5367e-05	-0.689227	0.130971	5.93186	0.157041	0.010215	0.00794921	0.0155153	0.0155153	15.5574	17.1449	19.7174	7.47597	9.88714	8.55425
ENSMUST00000042147.5	ENSMUSG00000033294	Noc4l	protein_coding	1.48543e-07	1.60189e-05	0.406298	0.0773259	7.74139	0.0530034	0.000620416	0.00372959	0.00834854	0.00834854	26.036	24.0573	25.0309	39.1264	34.0071	38.2952
ENSMUST00000103198.10	ENSMUSG00000027405	Nop56	protein_coding	1.54304e-07	1.65646e-05	0.376684	0.0717857	8.92856	0.0450778	0.000277302	0.00286074	0.00745247	0.00745247	94.0774	96.8406	102.499	146.014	132.111	144.224
ENSMUST00000026050.7	ENSMUSG00000025068	Gsto1	protein_coding	1.54094e-07	1.65646e-05	-0.43603	0.0830914	10.0693	0.0653218	0.000110479	0.0102458	0.00877013	0.0102458	862.245	752.731	737.798	460.665	470.681	576.019
ENSMUST00000031681.9	ENSMUSG00000029671	Wnt16	protein_coding	1.57156e-07	1.68324e-05	-0.877556	0.167346	4.80827	0.237818	0.00949843	-0.00101453	0.0325084	0.0325084	3.35697	3.49654	2.90594	1.31087	1.20513	1.47343
ENSMUST00000044766.14	ENSMUSG00000027309	4930402H24Rik	protein_coding	1.58436e-07	1.69312e-05	-0.389481	0.0742933	8.05035	0.0475698	0.000386468	0.00219006	0.00789277	0.00789277	16.0815	17.9132	15.514	10.6528	10.9452	11.4148
ENSMUST00000081182.4	ENSMUSG00000028693	Nasp	protein_coding	1.58911e-07	1.69436e-05	0.603222	0.115076	6.67861	0.115198	0.00857737	-0.00103316	0.0112865	0.0112865	12.5585	13.6765	15.7725	24.2725	25.4253	25.6681
ENSMUST00000021311.9	ENSMUSG00000051378	Kif18b	protein_coding	1.65307e-07	1.75858e-05	0.582516	0.111281	7.1254	0.116658	0.00104914	0.0175261	0.00975266	0.0175261	6.0621	7.68719	7.91818	14.4049	11.899	11.9762
ENSMUST00000034742.7	ENSMUSG00000032218	Ccnb2	protein_coding	1.67589e-07	1.77885e-05	0.428399	0.0818789	7.2684	0.0629936	0.000673583	0.00924622	0.00938266	0.00938266	23.9057	23.105	25.7494	41.4031	36.607	32.1628
ENSMUST00000058437.13	ENSMUSG00000043716	Rpl7	protein_coding	1.7352e-07	1.82667e-05	-0.401486	0.0768296	10.0415	0.0546605	0.000146122	0.00773272	0.00870805	0.00870805	821.37	776.861	903.715	494.606	572.917	580.594
ENSMUST00000170516.8	ENSMUSG00000024952	Rps6ka4	protein_coding	1.73641e-07	1.82667e-05	0.399948	0.076537	7.87759	0.0543109	0.0006602	0.00724407	0.00812667	0.00812667	16.5782	16.4586	19.1911	27.0979	24.093	25.8828
ENSMUST00000025903.5	ENSMUSG00000024952	Rps6ka4	protein_coding	1.73641e-07	1.82667e-05	0.399948	0.076537	7.87759	0.0543109	0.0006602	0.00724407	0.00812667	0.00812667	16.5782	16.4586	19.1911	27.0979	24.093	25.8828
ENSMUST00000087316.5	ENSMUSG00000067276	Capn6	protein_coding	1.72772e-07	1.82667e-05	0.487479	0.093271	6.59918	0.0779756	0.00138816	0.00696806	0.0116611	0.0116611	4.44969	5.24259	4.74577	7.4834	8.75348	7.01224
ENSMUST00000026986.6	ENSMUSG00000025868	Higd2a	protein_coding	1.76311e-07	1.85064e-05	-0.421386	0.0806833	7.41145	0.0569331	0.000730713	0.00384827	0.00903397	0.00903397	114.584	109.092	117.77	79.3691	71.4383	69.8228
ENSMUST00000032568.13	ENSMUSG00000030409	Dmpk	protein_coding	1.79424e-07	1.87499e-05	-0.741574	0.142078	6.33047	0.189203	0.016804	0.0134753	0.0131976	0.0134753	9.49662	7.07648	5.84485	3.07467	3.71512	3.59682
ENSMUST00000007733.7	ENSMUSG00000007589	Tinf2	protein_coding	1.79042e-07	1.87499e-05	0.594857	0.11396	6.29429	0.115663	0.00607874	0.00580409	0.0134015	0.0134015	3.88652	3.46805	4.22974	7.71536	6.6596	6.35522
ENSMUST00000052355.14	ENSMUSG00000035351	Nup37	protein_coding	1.83124e-07	1.90942e-05	0.527766	0.101188	6.45084	0.0912163	0.00287252	0.00669646	0.012486	0.012486	11.9108	12.8375	15.1498	20.8618	22.7665	22.7833
ENSMUST00000079413.10	ENSMUSG00000024222	Fkbp5	protein_coding	1.83911e-07	1.91341e-05	0.551706	0.105794	7.09257	0.104745	0.00110158	0.015687	0.00984271	0.015687	6.00184	7.47411	8.03029	13.2365	12.4754	11.0527
ENSMUST00000084882.8	ENSMUSG00000006356	Crip2	protein_coding	1.84336e-07	1.91361e-05	-0.373645	0.0716552	8.98071	0.0474802	0.000237593	0.00675878	0.00746412	0.00746412	184.263	158.895	184.992	125.295	112.556	121.44
ENSMUST00000050063.8	ENSMUSG00000044147	Arf6	protein_coding	1.86987e-07	1.93687e-05	0.389019	0.0746416	8.00844	0.047578	0.000412276	0.00230926	0.00794477	0.00794477	48.6953	42.8628	42.8463	67.5944	63.2518	65.1184
ENSMUST00000023061.6	ENSMUSG00000022426	Josd1	protein_coding	1.87821e-07	1.94125e-05	0.414886	0.0796173	7.48158	0.0535539	0.000638581	0.00175473	0.0088698	0.0088698	11.754	11.5454	11.6772	18.7568	17.0411	16.6418
ENSMUST00000093166.10	ENSMUSG00000020340	Cyfip2	protein_coding	1.93919e-07	1.9999e-05	-0.706852	0.135801	5.59238	0.152146	0.00904824	-0.00623103	0.0186144	0.0186144	1.77775	1.57014	1.68086	0.795233	0.835255	0.814879
ENSMUST00000001258.14	ENSMUSG00000001228	Uhrf1	protein_coding	1.96327e-07	2.02033e-05	0.972696	0.186957	7.20966	0.325785	0.0379517	0.0144776	0.00953094	0.0144776	5.441	5.04597	8.76417	17.4873	15.5214	15.8523
ENSMUST00000067853.5	ENSMUSG00000054675	Tmem119	protein_coding	1.97149e-07	2.02438e-05	0.735683	0.141423	7.65717	0.186369	0.000556234	0.0294445	0.008503	0.0294445	15.7682	15.2281	18.5378	41.57	34.4961	27.4379
ENSMUST00000033920.5	ENSMUSG00000031521	Aga	protein_coding	1.99209e-07	2.0411e-05	-0.461629	0.0887735	6.81322	0.0695424	0.00108406	0.00593112	0.010737	0.010737	37.7655	31.7889	31.394	19.7863	20.3842	22.3186
ENSMUST00000035276.4	ENSMUSG00000042462	Dctpp1	protein_coding	2.09592e-07	2.14283e-05	0.493744	0.0951224	7.59393	0.0839929	0.000474639	0.0130978	0.008628	0.0130978	84.188	70.5085	85.7437	124.686	118.361	143.603
ENSMUST00000168015.7	ENSMUSG00000002227	Mov10	protein_coding	2.29753e-07	2.33652e-05	0.735508	0.142168	7.21794	0.186546	0.00680575	0.023512	0.00950979	0.023512	6.29024	7.25727	7.76816	17.7094	15.2358	11.5731
ENSMUST00000020379.12	ENSMUSG00000020167	Tcf3	protein_coding	2.29476e-07	2.33652e-05	0.512888	0.0991332	7.45818	0.0816016	0.00581765	-0.00246092	0.00892344	0.00892344	12.3621	11.9958	10.6802	20.2856	17.9557	19.6219
ENSMUST00000142044.1	ENSMUSG00000087340	Gm15228	lncRNA	2.30021e-07	2.33652e-05	-1.2811	0.247637	4.6954	0.565951	0.0116535	0.0803327	0.0356086	0.0803327	1.93763	1.68431	2.29868	0.333076	0.654824	0.686086
ENSMUST00000037141.8	ENSMUSG00000037111	Setd7	protein_coding	2.31042e-07	2.34185e-05	-0.474015	0.0916421	7.83395	0.0774849	0.000440187	0.0121572	0.00819407	0.0121572	11.9792	13.1145	11.7038	6.31692	8.11548	8.38844
ENSMUST00000029049.6	ENSMUSG00000027536	Chmp4c	protein_coding	2.32607e-07	2.35267e-05	-0.968542	0.187296	4.66818	0.313964	0.0161791	0.024498	0.0364404	0.0364404	0.99337	0.873524	0.661553	0.244341	0.337737	0.357821
ENSMUST00000060714.9	ENSMUSG00000050148	Ubqln2	protein_coding	2.43091e-07	2.45345e-05	-0.386612	0.0748821	7.91803	0.0489471	0.000343751	0.00478919	0.00806724	0.00806724	27.7637	33.5701	28.9672	21.0669	20.0331	19.2068
ENSMUST00000035301.6	ENSMUSG00000039105	Atp6v1g1	protein_coding	2.45343e-07	2.46565e-05	-0.373643	0.0723944	8.32839	0.0472723	0.00023977	0.00649709	0.00762165	0.00762165	162.248	140.716	147.058	92.6401	104.071	108.545
ENSMUST00000023666.10	ENSMUSG00000022945	Chaf1b	protein_coding	2.45226e-07	2.46565e-05	0.456218	0.0883919	7.11289	0.0698602	0.001933	0.00734156	0.00978669	0.00978669	13.8185	13.5736	15.8977	24.4345	20.7858	22.2838
ENSMUST00000130530.7	ENSMUSG00000017493	Igfbp4	processed_transcript	2.56025e-07	2.56754e-05	0.970525	0.188333	6.8746	0.325139	0.00176793	0.051436	0.0105162	0.051436	21.6501	19.7442	30.0915	76.6718	58.6761	50.8959
ENSMUST00000103182.7	ENSMUSG00000027339	Rassf2	protein_coding	2.66018e-07	2.66209e-05	0.863208	0.167742	4.94788	0.247989	0.0129112	0.017652	0.0292947	0.0292947	0.566294	0.492995	0.587081	1.61342	1.2841	1.02856
ENSMUST00000029941.15	ENSMUSG00000028273	Pdlim5	protein_coding	2.67337e-07	2.66701e-05	-0.556681	0.108196	8.94937	0.107016	0.000316365	0.0172431	0.00745661	0.0172431	62.4261	69.5569	57.279	29.3426	38.1384	40.2367
ENSMUST00000025646.2	ENSMUSG00000024737	Slc15a3	protein_coding	2.67638e-07	2.66701e-05	1.07602	0.209143	5.07382	0.399837	0.0101163	0.055495	0.0268179	0.055495	0.785071	0.944446	1.50417	2.91042	3.30162	2.89403
ENSMUST00000037907.12	ENSMUSG00000040296	Ddx58	protein_coding	2.82969e-07	2.81385e-05	0.804287	0.156645	6.89161	0.223509	0.00215493	0.0346517	0.0104578	0.0346517	4.15601	5.66897	5.62681	10.2885	14.3294	9.61657
ENSMUST00000086471.11	ENSMUSG00000066900	Suds3	protein_coding	2.90346e-07	2.88114e-05	0.387603	0.0755618	8.11809	0.0507163	0.000749398	0.00630753	0.00781499	0.00781499	33.6545	27.7439	31.5473	47.2167	42.8371	45.2272
ENSMUST00000056370.12	ENSMUSG00000028066	Pmf1	protein_coding	2.91756e-07	2.88906e-05	0.526486	0.102655	7.39924	0.0958018	0.000854801	0.0149522	0.00906337	0.0149522	38.314	32.6809	41.1064	70.6492	58.3475	58.0325
ENSMUST00000216826.1	ENSMUSG00000002820	Atg4d	retained_intron	2.94355e-07	2.90869e-05	0.531658	0.103697	6.60837	0.0977018	0.00186521	0.0142644	0.0116156	0.0142644	7.31029	6.11348	7.25134	10.5469	10.8689	13.4942
ENSMUST00000090824.11	ENSMUSG00000004085	Map3k20	protein_coding	3.01729e-07	2.97534e-05	-0.525769	0.102642	6.33917	0.0870168	0.00265505	0.00245376	0.013148	0.013148	6.26941	6.98333	6.16461	3.70425	3.5147	4.11146
ENSMUST00000163588.7	ENSMUSG00000033855	Ston1	protein_coding	3.02538e-07	2.9771e-05	-0.392556	0.0766432	7.81716	0.0489958	0.000590349	0.00286683	0.00822093	0.00822093	29.6525	28.6504	25.7774	17.3896	19.4508	19.3014
ENSMUST00000022853.14	ENSMUSG00000058914	C1qtnf3	protein_coding	3.0908e-07	3.03515e-05	-0.624617	0.122047	7.039	0.134918	0.00283764	0.0195057	0.00999506	0.0195057	20.9956	20.5481	23.9581	12.0722	13.5591	9.27923
ENSMUST00000044949.10	ENSMUSG00000078789	Dph1	protein_coding	3.10922e-07	3.0469e-05	0.485212	0.094829	6.74341	0.0743927	0.00247897	0.00222543	0.0110098	0.0110098	8.83699	7.83773	8.948	14.0616	13.0732	13.8478
ENSMUST00000020911.13	ENSMUSG00000020592	Sdc1	protein_coding	3.20989e-07	3.13905e-05	0.392216	0.0767443	8.26987	0.0523745	0.00116628	0.00661421	0.00766826	0.00766826	26.2872	26.1181	28.0509	44.2435	36.2282	37.6786
ENSMUST00000132773.1	ENSMUSG00000074825	Itpripl1	protein_coding	3.37943e-07	3.29534e-05	0.642122	0.125883	5.63748	0.130723	0.00569209	0.00309109	0.0180776	0.0180776	1.52683	1.74083	1.7826	3.52763	3.06996	2.89546
ENSMUST00000015796.8	ENSMUSG00000015652	Steap1	protein_coding	3.38366e-07	3.29534e-05	0.481894	0.0944758	6.51551	0.0726628	0.00128422	0.00246099	0.0121043	0.0121043	15.1439	13.6796	13.6362	23.3491	23.5473	20.8893
ENSMUST00000167766.1	ENSMUSG00000039470	Zdhhc2	protein_coding	3.40737e-07	3.3116e-05	-0.833841	0.163518	5.57888	0.240673	0.0112165	0.0288906	0.0187853	0.0288906	8.52631	8.58843	7.36536	2.54636	4.34385	3.79161
ENSMUST00000022976.5	ENSMUSG00000022350	Washc5	protein_coding	3.55045e-07	3.44357e-05	-0.38604	0.0758189	8.25743	0.0516062	0.000562293	0.00806046	0.00767887	0.00806046	31.0533	37.4316	35.3503	20.7026	23.9486	24.8383
ENSMUST00000131820.1	ENSMUSG00000034868	Myl12b	retained_intron	3.60062e-07	3.48507e-05	-0.634257	0.124634	5.6301	0.128122	0.00513843	0.00415822	0.0181621	0.0181621	53.2098	50.8362	61.4206	28.1092	28.8752	27.9092
ENSMUST00000031122.8	ENSMUSG00000029212	Gabrb1	protein_coding	3.63013e-07	3.50645e-05	-1.0093	0.198393	4.54525	0.337013	0.0183405	0.0209161	0.040699	0.040699	0.406997	0.39421	0.290069	0.104611	0.126784	0.160329
ENSMUST00000082365.5	ENSMUSG00000018865	Sult4a1	protein_coding	3.70659e-07	3.573e-05	-0.644835	0.12685	5.62816	0.144053	0.0046809	0.0194555	0.0181844	0.0194555	4.65971	3.81617	4.30757	1.95092	2.0039	2.73574
ENSMUST00000075770.12	ENSMUSG00000024593	Megf10	protein_coding	3.77148e-07	3.62815e-05	-0.791862	0.155874	6.15586	0.217269	0.0021697	0.0342753	0.0141681	0.0342753	2.19159	3.58878	2.40097	1.087	1.33782	1.16241
ENSMUST00000207932.1	ENSMUSG00000039405	Prss23	protein_coding	3.88682e-07	3.73151e-05	-0.365788	0.0720846	9.36226	0.042224	0.00011277	0.00249198	0.00768152	0.00768152	220.613	226.036	222.705	153.015	164.621	141.252
ENSMUST00000190723.6	ENSMUSG00000014602	Kif1a	protein_coding	3.98371e-07	3.80904e-05	-0.89195	0.175936	5.74529	0.260678	0.0294538	-0.00194738	0.0169766	0.0169766	1.68045	2.10746	2.13258	0.935117	0.650303	0.828064
ENSMUST00000138939.1	ENSMUSG00000024019	Cmtr1	retained_intron	3.98046e-07	3.80904e-05	0.444969	0.0877669	7.19883	0.0656663	0.00199576	0.00583826	0.00955878	0.00955878	8.70471	10.3518	10.0147	16.4559	14.374	13.9456
ENSMUST00000061468.8	ENSMUSG00000030814	Bcl7c	protein_coding	4.00654e-07	3.82313e-05	0.5433	0.107188	7.26751	0.10234	0.00135039	0.0158836	0.00938488	0.0158836	30.7703	28.0058	20.3816	44.3131	42.2125	46.8452
ENSMUST00000038770.3	ENSMUSG00000039646	Vasn	protein_coding	4.01814e-07	3.82647e-05	0.723451	0.142746	8.16214	0.181466	0.000336333	0.0302283	0.00776852	0.0302283	19.0022	22.7914	24.5097	55.9222	42.8267	37.5719
ENSMUST00000066529.4	ENSMUSG00000022206	Npr3	protein_coding	4.1065e-07	3.90275e-05	-0.591168	0.11674	5.87309	0.119933	0.00451385	0.0143477	0.0159287	0.0159287	1.94323	2.44959	2.09001	1.0609	1.42408	1.06865
ENSMUST00000102503.9	ENSMUSG00000028741	Mrto4	protein_coding	4.11837e-07	3.90617e-05	0.366161	0.0723152	8.48899	0.0439457	0.000322642	0.00433176	0.0075216	0.0075216	108.639	95.8326	101.142	148.446	134.116	153.267
ENSMUST00000028794.9	ENSMUSG00000027322	Siglec1	protein_coding	4.15889e-07	3.93669e-05	1.67638	0.3312	4.02509	0.974707	0.0618776	0.102662	0.0752836	0.102662	0.0540696	0.127215	0.112828	0.558146	0.655109	0.331879
ENSMUST00000025740.7	ENSMUSG00000024824	Rad9a	protein_coding	4.2226e-07	3.98901e-05	0.445333	0.0880341	7.06169	0.0619271	0.00169535	0.00134308	0.00992965	0.00992965	11.8826	12.0319	12.4471	19.3254	17.4289	19.511
ENSMUST00000065001.11	ENSMUSG00000026883	Dab2ip	protein_coding	4.23605e-07	3.99372e-05	-0.955101	0.188829	6.28807	0.28427	0.0400481	-0.0267918	0.0134363	0.0134363	3.12484	3.90741	3.07342	1.38381	1.13433	1.31832
ENSMUST00000102926.4	ENSMUSG00000028333	Anp32b	protein_coding	4.36258e-07	4.10482e-05	0.367264	0.0726908	9.21481	0.0468057	0.000146697	0.00777924	0.00756943	0.00777924	146.685	143.574	161.86	235.991	214.409	197.804
ENSMUST00000006915.13	ENSMUSG00000006732	Mettl1	protein_coding	4.40494e-07	4.13644e-05	0.541319	0.10718	7.14638	0.101693	0.00187996	0.0153513	0.00969627	0.0153513	15.2044	13.7889	17.7687	29.5158	23.8832	25.9769
ENSMUST00000034497.7	ENSMUSG00000043613	Mmp3	protein_coding	4.46466e-07	4.17592e-05	1.1616	0.230111	4.32756	0.468337	0.0176512	0.0617757	0.0509408	0.0617757	0.502507	0.808963	1.01932	2.63114	1.94959	2.57416
ENSMUST00000020754.9	ENSMUSG00000020462	Cfap36	protein_coding	4.45958e-07	4.17592e-05	-0.744201	0.147419	6.80336	0.192229	0.00186853	0.0307299	0.0107741	0.0307299	28.4111	25.6512	26.5304	9.38142	14.4098	14.5779
ENSMUST00000024119.10	ENSMUSG00000023348	Trip6	protein_coding	4.56358e-07	4.26e-05	0.369042	0.0731673	8.2238	0.0461723	0.000321347	0.00632212	0.00770883	0.00770883	38.3125	33.5532	39.0113	54.9596	49.6228	53.9847
ENSMUST00000055843.8	ENSMUSG00000074102	Rbm15b	protein_coding	4.58192e-07	4.26028e-05	0.380607	0.0754717	7.92073	0.0487619	0.000480594	0.00614868	0.00806338	0.00806338	9.10102	9.22734	8.97473	15.002	12.2947	12.4252
ENSMUST00000026150.14	ENSMUSG00000025154	Arhgap19	protein_coding	4.57586e-07	4.26028e-05	0.518564	0.102823	6.30667	0.0824398	0.00252662	-0.000317725	0.0133321	0.0133321	2.29234	2.56293	2.42551	4.19145	4.0872	3.79297
ENSMUST00000072841.11	ENSMUSG00000060600	Eno3	protein_coding	4.63003e-07	4.29656e-05	-0.519702	0.103094	7.894	0.0937813	0.000680314	0.0152623	0.00810221	0.0152623	81.9095	60.6305	64.6803	40.5168	36.6417	43.6517
ENSMUST00000042556.10	ENSMUSG00000032834	Pwp2	protein_coding	4.64964e-07	4.3063e-05	0.380178	0.0754286	7.87464	0.0474375	0.000403098	0.00469312	0.00813112	0.00813112	13.9483	15.5104	15.1653	23.0877	19.8723	21.6441
ENSMUST00000132294.8	ENSMUSG00000000031	H19	lncRNA	4.66831e-07	4.31512e-05	1.1341	0.225044	4.89239	0.407841	0.0454639	-0.0179809	0.030503	0.030503	2.14884	1.56956	1.65857	6.65501	4.8461	5.17579
ENSMUST00000197208.1	ENSMUSG00000105815	Gm43541	TEC	4.83111e-07	4.45689e-05	-1.00506	0.199697	6.39511	0.350895	0.00223781	0.0575805	0.012823	0.0575805	101.293	70.37	84.6478	37.4122	34.3662	21.4733
ENSMUST00000114389.9	ENSMUSG00000031388	Naa10	protein_coding	4.88638e-07	4.49909e-05	0.438945	0.0872529	7.36259	0.0669375	0.00202649	0.0093931	0.00915184	0.0093931	42.0564	36.4082	37.3915	63.3443	50.2658	63.1158
ENSMUST00000114294.7	ENSMUSG00000029802	Abcg2	protein_coding	5.03967e-07	4.6312e-05	-0.497771	0.0990628	7.6105	0.0861088	0.000657588	0.0140626	0.00859449	0.0140626	36.2331	39.8569	41.3416	19.6453	24.2204	26.8391
ENSMUST00000047419.7	ENSMUSG00000041736	Tspo	protein_coding	5.17429e-07	4.74567e-05	0.363519	0.072418	8.33475	0.0444246	0.000249637	0.0057263	0.00761691	0.00761691	139.12	116.641	131.678	181.1	175.725	189.972
ENSMUST00000141681.1	ENSMUSG00000086266	Igf2os	lncRNA	5.24023e-07	4.79684e-05	0.525868	0.104811	6.19681	0.0860548	0.00253671	0.00133036	0.0139413	0.0139413	1.9367	2.11092	1.99224	3.40143	3.12556	3.60675
ENSMUST00000021085.10	ENSMUSG00000020739	Nup85	protein_coding	5.32949e-07	4.86911e-05	0.383234	0.0764319	7.85002	0.0484626	0.000593895	0.00490892	0.00816885	0.00816885	27.3203	25.2648	29.5527	41.6061	39.0763	37.7629
ENSMUST00000114976.8	ENSMUSG00000024188	Luc7l	protein_coding	5.41287e-07	4.93574e-05	0.477731	0.0953352	6.61314	0.0729904	0.00204099	0.00361188	0.0115922	0.0115922	3.15878	3.67736	3.75321	5.82795	5.75796	5.20298
ENSMUST00000153183.7	ENSMUSG00000005374	Tbl2	protein_coding	5.61939e-07	5.11419e-05	0.626176	0.125139	6.80464	0.13642	0.0016658	0.0218237	0.0107693	0.0218237	2.19826	2.49619	2.74322	5.48367	4.5467	3.79541
ENSMUST00000095313.4	ENSMUSG00000035873	Pawr	protein_coding	5.64364e-07	5.1209e-05	-0.518696	0.103676	7.02379	0.0936123	0.00119279	0.0149304	0.0100396	0.0149304	27.6475	27.758	20.2093	13.2657	15.2614	15.66
ENSMUST00000078961.5	ENSMUSG00000024301	Kifc5b	protein_coding	5.64845e-07	5.1209e-05	0.605472	0.121025	5.88986	0.120614	0.00616353	0.00713002	0.015807	0.015807	2.87763	2.29045	3.00662	4.86125	4.84926	5.01764
ENSMUST00000102763.4	ENSMUSG00000020392	Cdkn2aipnl	protein_coding	5.76792e-07	5.21919e-05	0.414937	0.0830068	7.16488	0.0528546	0.000687956	0.000815524	0.00964724	0.00964724	18.423	17.2705	17.9759	26.3667	26.0412	27.4801
ENSMUST00000000940.14	ENSMUSG00000000916	Nsun5	protein_coding	5.84783e-07	5.28139e-05	0.455947	0.0912591	6.84684	0.0682974	0.00187831	0.00553565	0.010614	0.010614	9.97648	8.85279	8.70087	15.6042	12.9131	14.3225
ENSMUST00000109432.3	ENSMUSG00000006369	Fbln1	protein_coding	5.87717e-07	5.29776e-05	0.651313	0.130388	7.07487	0.147664	0.00155016	0.0239512	0.00989226	0.0239512	8.77893	10.8651	11.1101	23.0583	19.1917	16.1886
ENSMUST00000063661.12	ENSMUSG00000052459	Atp6v1a	protein_coding	5.89217e-07	5.30116e-05	-0.935383	0.187274	6.81111	0.304568	0.0229894	0.0296182	0.010745	0.0296182	11.6631	13.2734	9.65651	3.21823	5.76153	4.654
ENSMUST00000064167.7	ENSMUSG00000028557	Rnf11	protein_coding	5.91895e-07	5.31513e-05	-0.520178	0.104164	7.57977	0.0941958	0.000896813	0.0153784	0.00865708	0.0153784	48.7404	47.6487	42.9312	22.2189	30.0794	29.7571
ENSMUST00000038677.4	ENSMUSG00000035049	Rrp12	protein_coding	5.94986e-07	5.33274e-05	0.368204	0.0737465	8.09879	0.0465848	0.000321449	0.00706909	0.00783637	0.00783637	15.0639	16.776	17.6256	25.4293	21.614	23.4855
ENSMUST00000062613.11	ENSMUSG00000050052	Tdrp	protein_coding	6.13435e-07	5.48769e-05	-0.839453	0.16833	4.80178	0.22761	0.00982948	0.0104275	0.0326732	0.0326732	2.83882	2.1369	1.89796	0.961455	0.944674	0.971508
ENSMUST00000231663.1	ENSMUSG00000116656	Gm49708	lncRNA	6.26338e-07	5.59253e-05	-0.796693	0.159885	5.05231	0.21165	0.0111261	0.0154166	0.0272187	0.0272187	7.81868	5.84033	5.14623	2.5572	2.64925	3.04176
ENSMUST00000025486.8	ENSMUSG00000024590	Lmnb1	protein_coding	6.38506e-07	5.69041e-05	0.415956	0.0835389	8.08711	0.0602803	0.000401714	0.0100664	0.0078496	0.0100664	24.052	29.6622	26.3669	44.422	40.2058	35.8148
ENSMUST00000119854.7	ENSMUSG00000037736	Limch1	protein_coding	6.41245e-07	5.70406e-05	-0.675849	0.135757	6.19586	0.139551	0.0136985	-0.0105493	0.0139465	0.0139465	4.77061	4.49521	4.48565	2.30264	2.48257	2.14662
ENSMUST00000002914.9	ENSMUSG00000002835	Chaf1a	protein_coding	6.5493e-07	5.81484e-05	0.381059	0.076606	7.7982	0.0477976	0.00055087	0.00474384	0.00825186	0.00825186	8.91815	9.21869	9.87584	14.7794	12.9463	12.8873
ENSMUST00000094666.3	ENSMUSG00000070720	Tmem200b	protein_coding	6.66091e-07	5.90284e-05	0.932828	0.187654	4.61808	0.276408	0.0147504	0.0044464	0.0380708	0.0380708	1.00904	1.19662	1.39548	3.21582	2.84432	2.98597
ENSMUST00000074628.12	ENSMUSG00000034341	Wbp2	protein_coding	6.68984e-07	5.91738e-05	-0.359425	0.0723165	8.29426	0.04284	0.000196356	0.0049089	0.00764817	0.00764817	69.3231	69.5761	70.5318	50.4447	43.4626	51.4896
ENSMUST00000166526.8	ENSMUSG00000061613	U2af1	protein_coding	6.90932e-07	6.10009e-05	0.692184	0.139444	5.99434	0.150425	0.0140565	-0.00569524	0.0151104	0.0151104	10.544	8.95031	11.0039	20.636	19.7475	19.2493
ENSMUST00000105994.3	ENSMUSG00000074088	Snrnp40	protein_coding	7.024e-07	6.18188e-05	0.375762	0.0757477	7.83154	0.0448357	0.000408669	0.00268713	0.0081979	0.0081979	38.4349	41.2293	40.409	61.5642	54.1136	56.8731
ENSMUST00000001559.10	ENSMUSG00000001518	Itfg2	protein_coding	7.02813e-07	6.18188e-05	0.465002	0.0937393	6.6416	0.066273	0.00172472	3.16627e-05	0.0114559	0.0114559	7.49861	7.06817	7.21864	11.0472	11.2923	11.916
ENSMUST00000023510.6	ENSMUSG00000022814	Umps	protein_coding	7.07191e-07	6.20883e-05	0.369121	0.0744288	8.05276	0.0447812	0.000419611	0.00446311	0.00788987	0.00788987	21.0128	22.2286	23.3481	34.5656	30.4092	29.8943
ENSMUST00000026700.7	ENSMUSG00000025610	Map3k7cl	protein_coding	7.19136e-07	6.30198e-05	-0.510407	0.102985	6.72937	0.0908816	0.0011262	0.0147827	0.0110678	0.0147827	21.42	22.981	17.9195	11.1553	11.4828	14.2875
ENSMUST00000031009.7	ENSMUSG00000029126	Nsg1	protein_coding	7.23545e-07	6.32887e-05	0.423297	0.0854294	7.15399	0.0577353	0.00127125	0.00370521	0.00967603	0.00967603	11.049	11.2436	11.9601	18.9033	16.7212	16.2453
ENSMUST00000030773.11	ENSMUSG00000028933	Xrcc2	protein_coding	7.33176e-07	6.40126e-05	0.671286	0.135549	5.40309	0.139573	0.00619044	-0.000708291	0.0213697	0.0213697	1.32393	1.56763	1.53455	3.01934	2.81955	2.68647
ENSMUST00000034537.7	ENSMUSG00000032038	St3gal4	protein_coding	7.49754e-07	6.52562e-05	0.40586	0.082025	7.36666	0.0538859	0.000950151	0.00463616	0.00914199	0.00914199	17.5477	17.6882	19.2537	27.3229	24.8318	28.6662
ENSMUST00000050027.8	ENSMUSG00000037362	Ccn3	protein_coding	7.50182e-07	6.52562e-05	0.859514	0.173713	6.42989	0.257841	0.00234615	0.0429181	0.0126145	0.0429181	3.72257	4.93741	5.03267	13.3938	10.7597	8.12483
ENSMUST00000005705.7	ENSMUSG00000005566	Trim28	protein_coding	7.58347e-07	6.58451e-05	0.366334	0.0740699	9.74302	0.045463	8.28873e-05	0.00642056	0.00814663	0.00814663	121.114	113.106	109.181	176.046	145.311	168.43
ENSMUST00000081510.3	ENSMUSG00000054612	Mgmt	protein_coding	7.6294e-07	6.60013e-05	-0.469463	0.0949443	7.02086	0.0769361	0.000943779	0.0125779	0.0100483	0.0125779	14.9027	11.5837	13.7765	8.32709	7.55018	8.91869
ENSMUST00000118535.7	ENSMUSG00000019478	Rab4a	protein_coding	7.62142e-07	6.60013e-05	-0.471634	0.0953795	6.55453	0.0774358	0.00175497	0.0116252	0.0118909	0.0118909	20.2272	18.266	19.0356	9.94574	12.4127	13.2363
ENSMUST00000119827.7	ENSMUSG00000019942	Cdk1	protein_coding	7.65278e-07	6.60825e-05	0.361755	0.0731701	8.26584	0.0416647	0.000359134	0.00264682	0.00767167	0.00767167	81.1876	76.435	84.5304	118.767	115.247	109.192
ENSMUST00000043050.8	ENSMUSG00000036599	Chst12	protein_coding	7.7609e-07	6.68938e-05	-0.405327	0.0820287	7.78921	0.0573615	0.000466166	0.00962689	0.00826676	0.00962689	34.9779	31.9823	32.9194	25.5162	19.9958	20.7972
ENSMUST00000024179.5	ENSMUSG00000023411	Nfatc4	protein_coding	8.03256e-07	6.91093e-05	0.550787	0.111618	6.59355	0.0971905	0.00699856	0.00072722	0.0116893	0.0116893	3.93456	4.43344	4.1567	7.628	7.64021	6.34529
ENSMUST00000057893.6	ENSMUSG00000050288	Fzd2	protein_coding	8.07718e-07	6.93668e-05	0.491852	0.0996964	8.02744	0.0845027	0.00033111	0.014578	0.00792082	0.014578	18.5409	19.8376	14.4746	31.6711	26.8189	26.7965
ENSMUST00000061799.9	ENSMUSG00000032334	Loxl1	protein_coding	8.28919e-07	7.10583e-05	0.433421	0.087943	9.63583	0.0656369	6.51274e-05	0.0115358	0.00798883	0.0115358	87.1057	104.544	83.6574	158.641	130.356	131.827
ENSMUST00000172298.7	ENSMUSG00000004771	Rab11a	protein_coding	8.54956e-07	7.31576e-05	-0.424799	0.0862994	7.37553	0.0624507	0.00205083	0.00834222	0.00912056	0.00912056	33.0367	30.1325	30.5005	17.1856	21.2379	22.0587
ENSMUST00000038474.13	ENSMUSG00000039356	Exosc2	protein_coding	8.6222e-07	7.35128e-05	0.393051	0.0798766	7.44615	0.0506904	0.000618947	0.00481063	0.00895145	0.00895145	24.2294	22.3791	25.8057	36.5109	33.0928	36.1452
ENSMUST00000006611.8	ENSMUSG00000006442	Srm	protein_coding	8.60754e-07	7.35128e-05	0.354298	0.0719962	9.2848	0.0402312	0.000157046	0.00305943	0.00761812	0.00761812	197.659	185.074	196.452	275.777	254.491	284.052
ENSMUST00000132956.7	ENSMUSG00000018819	Lsp1	processed_transcript	8.79946e-07	7.47543e-05	1.66289	0.338209	4.05651	0.966822	0.0480855	0.123493	0.0719216	0.123493	0.628773	1.07356	1.87834	6.10826	6.30375	4.84049
ENSMUST00000023143.13	ENSMUSG00000022500	Litaf	protein_coding	8.79851e-07	7.47543e-05	-0.351076	0.0714038	8.80434	0.0394172	0.000205986	0.00284517	0.00744176	0.00744176	107.3	108.598	101.42	71.7451	69.5017	79.6239
ENSMUST00000114011.10	ENSMUSG00000007050	Lsm2	protein_coding	8.89844e-07	7.54594e-05	0.558369	0.113615	6.73561	0.109023	0.00255562	0.0168071	0.0110418	0.0168071	32.7658	30.2462	21.5382	48.5704	47.8726	47.2727
ENSMUST00000118853.7	ENSMUSG00000027955	Gask1b	protein_coding	8.95875e-07	7.58347e-05	-0.562934	0.114575	8.19397	0.110821	0.0105915	0.00909967	0.00773693	0.00909967	20.7816	27.2001	21.8382	11.0413	13.1108	14.9745
ENSMUST00000110351.7	ENSMUSG00000021134	Srsf5	protein_coding	9.17356e-07	7.75141e-05	-0.607629	0.123789	6.33849	0.116592	0.0098337	-0.00254843	0.0131519	0.0131519	16.3883	17.9561	18.4576	10.0605	8.48113	9.78579
ENSMUST00000015003.9	ENSMUSG00000014859	E2f4	protein_coding	9.22881e-07	7.78417e-05	0.381143	0.0776669	7.68062	0.0482495	0.000589583	0.00524607	0.00845864	0.00845864	24.5524	23.1578	25.143	38.8788	33.5501	33.1782
ENSMUST00000097981.5	ENSMUSG00000073802	Cdkn2b	protein_coding	9.30697e-07	7.83611e-05	-0.690724	0.140799	7.39209	0.166919	0.000788358	0.0289481	0.00908059	0.0289481	60.3584	48.9795	41.0286	20.2915	28.1048	25.6905
ENSMUST00000023435.5	ENSMUSG00000022754	Tmem45a	protein_coding	9.37841e-07	7.88221e-05	0.514273	0.104863	6.35035	0.0925386	0.001748	0.0147463	0.013084	0.0147463	5.14911	5.19323	6.07053	10.1028	9.53234	7.52705
ENSMUST00000164217.7	ENSMUSG00000023942	Slc29a1	protein_coding	9.41375e-07	7.89785e-05	0.923513	0.188337	5.00887	0.267754	0.0251518	-0.0102883	0.0280544	0.0280544	2.26051	3.07941	2.85975	6.81446	6.73547	6.72975
ENSMUST00000109579.8	ENSMUSG00000042292	Mrtfa	protein_coding	9.43279e-07	7.8998e-05	-0.633538	0.129211	6.72728	0.140438	0.0139669	0.0110669	0.0110764	0.0110764	8.72958	6.22864	6.34433	4.24579	3.45289	3.37149
ENSMUST00000065927.5	ENSMUSG00000053475	Tnfaip6	protein_coding	9.51027e-07	7.95059e-05	0.617283	0.125937	5.49361	0.127465	0.00380487	0.0126367	0.0199854	0.0199854	3.30983	3.91519	4.17242	6.85491	7.90559	5.99514
ENSMUST00000034060.6	ENSMUSG00000031642	Sh3rf1	protein_coding	9.53301e-07	7.95552e-05	-0.433754	0.0885025	6.84815	0.0627777	0.00113968	0.00677888	0.0106094	0.0106094	6.08171	6.44513	5.04902	3.49213	3.77409	3.95899
ENSMUST00000045054.10	ENSMUSG00000036667	Tcaf1	protein_coding	9.61516e-07	8.00955e-05	-0.559215	0.114141	7.07974	0.10945	0.0022472	0.0172949	0.00987856	0.0172949	7.84383	10.1406	8.85864	4.29146	5.93751	4.94543
ENSMUST00000137365.1	ENSMUSG00000020241	Col6a2	retained_intron	9.63168e-07	8.00955e-05	1.47995	0.302091	4.93824	0.766587	0.0384127	0.0984759	0.029499	0.0984759	0.218514	0.398175	0.467885	2.12119	1.4629	1.0999
ENSMUST00000127543.7	ENSMUSG00000024339	Tap2	retained_intron	9.7087e-07	8.05941e-05	1.022	0.208679	4.70059	0.359275	0.0298663	0.0275486	0.0354541	0.0354541	0.567889	0.801586	0.620884	2.45065	1.78312	1.35764
ENSMUST00000092163.8	ENSMUSG00000069516	Lyz2	protein_coding	9.77252e-07	8.09816e-05	0.530518	0.108354	8.02722	0.0985236	0.000399516	0.0172113	0.00792109	0.0172113	50.9163	55.8119	67.9056	94.7176	109.179	87.4626
ENSMUST00000119398.9	ENSMUSG00000031565	Fgfr1	protein_coding	9.82302e-07	8.12575e-05	0.501656	0.10248	7.91748	0.0881004	0.00308092	0.0126724	0.00806803	0.0126724	14.7889	17.3271	11.7636	24.3828	23.8657	22.6651
ENSMUST00000218532.1	ENSMUSG00000019947	Arid5b	protein_coding	9.98167e-07	8.24256e-05	-0.799212	0.163371	5.26705	0.22365	0.0153148	0.0247205	0.0235063	0.0247205	2.55369	2.54825	2.59835	0.824297	1.25615	1.4174
ENSMUST00000115979.8	ENSMUSG00000084128	Esrp2	protein_coding	1.00997e-06	8.32546e-05	-0.915513	0.187233	4.55357	0.265398	0.0122028	0.00523342	0.0403817	0.0403817	1.2107	1.20855	0.94459	0.374635	0.467165	0.484963
ENSMUST00000150459.2	ENSMUSG00000087651	1500009L16Rik	protein_coding	1.01927e-06	8.38748e-05	-0.609803	0.124758	5.56851	0.125851	0.00442713	0.0134396	0.0189198	0.0189198	13.038	9.46623	9.73068	5.28678	5.7423	6.03929
ENSMUST00000040361.7	ENSMUSG00000039347	Atp6v0e2	protein_coding	1.02693e-06	8.43583e-05	-0.600852	0.122964	6.28812	0.126451	0.00769855	0.0149817	0.013436	0.0149817	12.7467	11.1924	11.1689	5.09191	6.568	7.5689
ENSMUST00000102972.5	ENSMUSG00000060981	H4c8	protein_coding	1.04241e-06	8.54815e-05	-0.959643	0.196509	4.84195	0.322613	0.0122392	0.0456845	0.0316779	0.0456845	27.1947	16.4245	14.529	6.70042	6.26363	8.22346
ENSMUST00000222462.1	ENSMUSG00000021477	Ctsl	protein_coding	1.06313e-06	8.70294e-05	-5.54608	1.13659	2.07989	9.25708	1.19734	-1.16061	0.740417	0.740417	5.21713	7.14869	8.52126	0	2.89711e-10	0
ENSMUST00000219239.1	ENSMUSG00000025403	Shmt2	protein_coding	1.0734e-06	8.7718e-05	0.640797	0.131373	7.52842	0.143897	0.00823134	0.017657	0.00876587	0.017657	15.2954	13.6816	19.5461	33.3063	27.1576	29.8112
ENSMUST00000119344.7	ENSMUSG00000027805	Pfn2	protein_coding	1.07962e-06	8.7738e-05	-0.564919	0.115844	6.64992	0.10224	0.00871278	-0.000587319	0.011417	0.011417	19.8821	16.5972	16.798	9.17807	10.6789	9.98727
ENSMUST00000079496.8	ENSMUSG00000060860	Ube2s	protein_coding	1.07648e-06	8.7738e-05	0.356394	0.0730746	9.6002	0.0437028	6.86856e-05	0.00692871	0.00794117	0.00794117	308.223	282.324	254.979	423.567	358.714	413.367
ENSMUST00000043911.7	ENSMUSG00000038884	Shfl	protein_coding	1.08108e-06	8.7738e-05	1.25374	0.25711	4.24932	0.498977	0.0433812	-0.0091072	0.055777	0.055777	0.524195	0.610932	0.545313	2.43923	2.10056	1.48408
ENSMUST00000074259.14	ENSMUSG00000059791	Nrm	protein_coding	1.07865e-06	8.7738e-05	0.594362	0.121877	5.68146	0.115478	0.00468135	0.00719142	0.0175998	0.0175998	3.72518	4.25088	4.60039	8.28453	7.34394	6.87924
ENSMUST00000109140.9	ENSMUSG00000027496	Aurka	protein_coding	1.11387e-06	9.02442e-05	0.533351	0.109509	7.99525	0.0997298	0.0010522	0.0169362	0.00796175	0.0169362	31.0191	36.9909	40.2068	69.7575	57.368	54.4836
ENSMUST00000084383.9	ENSMUSG00000031060	Rbm10	protein_coding	1.13183e-06	9.15428e-05	0.409421	0.0841182	7.42072	0.0532051	0.00160213	0.00204451	0.00901169	0.00901169	10.984	11.1194	12.1956	17.7502	16.358	16.8858
ENSMUST00000219655.1	ENSMUSG00000090841	Myl6	processed_transcript	1.13517e-06	9.16561e-05	-0.857759	0.176253	5.1091	0.23333	0.0204206	-0.00466435	0.0261772	0.0261772	16.192	13.4519	12.3939	6.53002	5.02597	5.90366
ENSMUST00000027980.7	ENSMUSG00000026669	Mcm10	protein_coding	1.1413e-06	9.1837e-05	0.540662	0.11112	6.35365	0.098972	0.00545652	0.0086404	0.013065	0.013065	2.92712	3.88904	3.8331	5.99578	6.215	5.68451
ENSMUST00000216755.1	ENSMUSG00000032060	Cryab	protein_coding	1.14015e-06	9.1837e-05	-0.537618	0.11049	8.487	0.10136	0.000809008	0.0175031	0.00752259	0.0175031	300.418	221.258	228.544	158.129	127.862	143.92
ENSMUST00000202308.3	ENSMUSG00000058013	Sept11	protein_coding	1.21853e-06	9.78844e-05	-0.519092	0.106972	6.93016	0.0885291	0.00683482	0.00278044	0.0103297	0.0103297	22.4908	21.5408	23.5537	11.5418	14.8374	13.6481
ENSMUST00000021922.9	ENSMUSG00000021469	Msx2	protein_coding	1.22956e-06	9.86027e-05	-1.22635	0.252813	6.23663	0.527875	0.00248	0.0933914	0.0137216	0.0933914	18.2286	9.42263	8.98006	3.62035	2.67791	3.86823
ENSMUST00000033004.7	ENSMUSG00000030748	Il4ra	protein_coding	1.25589e-06	0.000100543	0.919688	0.189759	6.11728	0.296958	0.00816672	0.045846	0.0143843	0.045846	1.10363	1.28188	1.87383	4.1054	3.24691	3.0278
ENSMUST00000023873.11	ENSMUSG00000023110	Prmt5	protein_coding	1.26186e-06	0.00010085	0.345319	0.0712635	8.85475	0.0389883	0.000174506	0.00384379	0.00744322	0.00744322	62.5461	59.8352	64.3248	88.1188	80.6272	91.9836
ENSMUST00000001115.15	ENSMUSG00000074886	Grk6	protein_coding	1.26609e-06	0.000101018	0.419932	0.0866731	7.92891	0.0593031	0.00321658	0.00478392	0.00805176	0.00805176	21.6425	19.5647	17.5833	26.8289	29.3066	32.1223
ENSMUST00000056601.10	ENSMUSG00000017288	Vps53	protein_coding	1.29103e-06	0.000102834	-0.396252	0.0818512	7.47705	0.050148	0.00116933	0.00263475	0.0088801	0.0088801	22.489	21.2064	20.7851	15.5349	13.8874	13.4407
ENSMUST00000105968.7	ENSMUSG00000018819	Lsp1	protein_coding	1.3115e-06	0.000104289	0.864523	0.178694	5.48451	0.262538	0.0243833	0.0235141	0.020124	0.0235141	1.9249	2.47003	3.275	6.81996	5.58038	5.31334
ENSMUST00000232289.1	ENSMUSG00000022962	Gart	protein_coding	1.32311e-06	0.000105035	0.353336	0.0730598	8.93118	0.0397619	0.000553657	0.00233145	0.00745295	0.00745295	52.5077	53.3659	55.547	76.1682	71.2508	79.8267
ENSMUST00000047356.10	ENSMUSG00000038539	Atf5	protein_coding	1.32793e-06	0.000105241	0.504887	0.104412	9.46983	0.0895556	0.00016676	0.016186	0.00778654	0.016186	123.733	152.467	158.5	260.517	236.914	214.795
ENSMUST00000018287.9	ENSMUSG00000018143	Mafk	protein_coding	1.33631e-06	0.00010555	-0.384492	0.0795346	7.55333	0.0502834	0.000776211	0.00664021	0.00871242	0.00871242	24.6555	20.5964	20.0007	15.3972	13.6992	14.6427
ENSMUST00000219109.1	ENSMUSG00000064181	Rab3ip	protein_coding	1.33622e-06	0.00010555	-0.37637	0.0778543	7.61566	0.0462594	0.000507772	0.00419596	0.00858417	0.00858417	43.1264	39.3327	36.9019	26.7782	25.8207	28.0531
ENSMUST00000195445.1	ENSMUSG00000102275	Gm37144	TEC	1.35694e-06	0.000107001	-0.820998	0.169936	7.27055	0.236865	0.000526967	0.0427903	0.0093773	0.0427903	80.3507	56.0552	73.6239	34.9212	33	23.1087
ENSMUST00000032949.13	ENSMUSG00000030707	Coro1a	protein_coding	1.36916e-06	0.000107578	0.551669	0.11423	6.01652	0.10696	0.00358514	0.0159877	0.0149735	0.0159877	5.53297	4.23008	5.72224	8.25461	8.66855	9.53223
ENSMUST00000048099.4	ENSMUSG00000040195	Nemp1	protein_coding	1.36969e-06	0.000107578	0.746001	0.154472	5.15797	0.188266	0.0104726	0.0161655	0.0253198	0.0253198	0.487692	0.663321	0.634153	1.42206	1.27493	1.01936
ENSMUST00000046534.14	ENSMUSG00000040688	Tbl3	retained_intron	1.37108e-06	0.000107578	0.3608	0.0747128	8.12115	0.0430547	0.000561342	0.00444073	0.00781165	0.00781165	25.805	25.1552	27.6242	36.8519	34.7378	40.0922
ENSMUST00000026839.4	ENSMUSG00000025742	Prps2	protein_coding	1.37805e-06	0.000107945	-0.442148	0.0915771	6.79286	0.0680647	0.00176547	0.0100049	0.0108141	0.0108141	10.1334	9.98127	9.62004	5.24091	6.88107	6.82221
ENSMUST00000003512.8	ENSMUSG00000003420	Fcgrt	protein_coding	1.38425e-06	0.000108089	0.710712	0.147229	5.79611	0.162588	0.015983	-0.00216505	0.0165315	0.0165315	3.52513	3.16831	3.76653	7.90329	7.14714	6.10663
ENSMUST00000011400.7	ENSMUSG00000011256	Adam19	protein_coding	1.38446e-06	0.000108089	-0.574546	0.119022	8.35905	0.11603	0.000265857	0.0209834	0.00759941	0.0209834	19.2644	28.5154	23.4515	14.0718	13.0091	12.1569
ENSMUST00000233417.1	ENSMUSG00000117098	Gm49909	protein_coding	1.39384e-06	0.000108641	-0.351824	0.0729036	9.50698	0.0410461	0.000144911	0.00474507	0.00782749	0.00782749	952.632	910.989	1041.13	645.322	686.779	674.427
ENSMUST00000022059.13	ENSMUSG00000021575	Ahrr	protein_coding	1.43401e-06	0.000111588	0.990431	0.205474	4.4047	0.308718	0.0164968	0.00154289	0.0468327	0.0468327	0.292956	0.355275	0.253574	0.899433	0.765078	0.730294
ENSMUST00000045288.13	ENSMUSG00000039239	Tgfb2	protein_coding	1.44569e-06	0.000112312	-0.595494	0.123582	6.76997	0.124711	0.00238673	0.0205222	0.0109031	0.0205222	6.05993	7.90563	6.72213	4.03939	4.2253	3.04756
ENSMUST00000031325.5	ENSMUSG00000029378	Areg	protein_coding	1.46888e-06	0.000113926	1.09608	0.227618	4.16997	0.420101	0.0161674	0.058438	0.0615477	0.0615477	1.49007	0.976307	0.710823	2.78864	2.8138	3.46242
ENSMUST00000171158.7	ENSMUSG00000020592	Sdc1	protein_coding	1.48426e-06	0.000114931	0.416886	0.0866104	7.73098	0.0611397	0.00168901	0.00956304	0.00836688	0.00956304	22.0543	20.0987	20.6663	36.2683	31.4614	27.2506
ENSMUST00000103172.3	ENSMUSG00000015932	Dstn	protein_coding	1.51155e-06	0.000116852	-0.613508	0.127556	10.3629	0.132442	3.28312e-05	0.0243731	0.00953948	0.0243731	824.469	716.291	705.26	317.317	426.431	466.361
ENSMUST00000080666.7	ENSMUSG00000036564	Ndrg4	protein_coding	1.51403e-06	0.000116853	-0.39474	0.0820772	7.41025	0.0476429	0.00106813	5.30825e-05	0.00903687	0.00903687	20.8139	20.1226	20.2331	13.9398	13.8996	12.8945
ENSMUST00000019697.8	ENSMUSG00000078762	Haus5	protein_coding	1.52363e-06	0.000117401	0.485	0.100871	6.36884	0.0717409	0.00228543	-0.000818853	0.0129771	0.0129771	5.70588	5.53724	5.72511	8.94246	8.72877	9.41373
ENSMUST00000219555.1	ENSMUSG00000059970	Hspa2	protein_coding	1.57536e-06	0.00012119	-0.533078	0.111025	6.15395	0.088294	0.00431108	-0.00050828	0.0141787	0.0141787	6.35271	7.54553	6.83173	3.87495	4.15034	3.98146
ENSMUST00000041769.7	ENSMUSG00000035770	Dync1li2	protein_coding	1.61936e-06	0.000124372	-0.36431	0.0759625	7.97219	0.0423194	0.00066329	0.00246542	0.00799217	0.00799217	21.7848	23.1746	22.0782	14.6017	16.8399	14.6092
ENSMUST00000113707.8	ENSMUSG00000032366	Tpm1	protein_coding	1.66622e-06	0.000127763	-0.454336	0.0948471	11.2395	0.064803	6.75966e-05	0.00352827	0.0134264	0.0134264	1542.3	1430.14	1503.16	894.667	899.951	1004.12
ENSMUST00000102588.9	ENSMUSG00000053730	Tmem39b	protein_coding	1.69374e-06	0.000129663	0.767666	0.160368	5.71698	0.207655	0.00940474	0.0291721	0.0172435	0.0291721	2.58307	3.29722	3.88322	8.12029	5.90934	6.67042
ENSMUST00000235128.1	ENSMUSG00000117922	Gm50397	lncRNA	1.7048e-06	0.000130299	-1.18006	0.246585	5.21738	0.490727	0.00595374	0.0852529	0.0243175	0.0852529	29.1603	18.303	18.7562	4.85219	5.82189	9.30354
ENSMUST00000031838.8	ENSMUSG00000029814	Igf2bp3	protein_coding	1.70997e-06	0.000130483	-0.374105	0.078183	7.65188	0.0469237	0.000655712	0.00551596	0.00851316	0.00851316	16.2303	18.6592	18.3711	10.8163	12.694	12.6089
ENSMUST00000021359.6	ENSMUSG00000020974	Pole2	protein_coding	1.72045e-06	0.00013107	0.538381	0.112543	5.88119	0.0921551	0.00312947	0.00336931	0.0158695	0.0158695	4.9336	4.99471	5.84986	8.51783	9.52356	8.59093
ENSMUST00000045756.13	ENSMUSG00000041959	S100a10	protein_coding	1.73386e-06	0.000131668	-0.453225	0.0947732	9.57807	0.0724021	8.60192e-05	0.0133869	0.00791275	0.0133869	1027.75	888.574	1105.01	570.526	680.066	632.999
ENSMUST00000131215.1	ENSMUSG00000084860	2610204G07Rik	lncRNA	1.73358e-06	0.000131668	-1.30328	0.272526	4.0897	0.598689	0.0195741	0.0918316	0.0686078	0.0918316	5.25924	3.13391	4.1782	0.717448	1.11391	1.58218
ENSMUST00000049348.8	ENSMUSG00000032586	Traip	protein_coding	1.73788e-06	0.000131761	0.736849	0.154097	6.19448	0.191379	0.00265989	0.0329588	0.0139542	0.0329588	3.09238	3.17463	4.53402	8.5465	6.98741	6.52588
ENSMUST00000113695.7	ENSMUSG00000032366	Tpm1	protein_coding	1.77269e-06	0.000134184	1.0676	0.223452	6.96983	0.401845	0.0300567	0.0448393	0.0102033	0.0448393	11.5437	11.554	12.5987	49.5993	34.5919	23.061
ENSMUST00000002902.7	ENSMUSG00000002825	Qtrt1	protein_coding	1.77582e-06	0.000134207	0.408873	0.085585	7.03455	0.0546184	0.00097914	0.0046025	0.010008	0.010008	19.1928	20.3064	21.069	30.6817	27.5687	32.0417
ENSMUST00000137903.7	ENSMUSG00000040296	Ddx58	processed_transcript	1.82615e-06	0.000137365	1.21422	0.254459	5.24313	0.519997	0.0276756	0.0694482	0.0238943	0.0694482	0.577819	1.14902	1.06697	3.52021	3.2942	2.25839
ENSMUST00000139780.2	ENSMUSG00000070509	Rgma	protein_coding	1.82634e-06	0.000137365	0.900233	0.188659	5.76731	0.285836	0.00737825	0.04601	0.0167786	0.04601	1.20417	1.60538	1.79301	4.82883	3.46417	3.0193
ENSMUST00000234247.1	ENSMUSG00000024308	Tapbp	protein_coding	1.82462e-06	0.000137365	0.784371	0.164372	6.61808	0.216993	0.0104982	0.0300288	0.0115681	0.0300288	5.13542	4.39041	5.72148	13.0352	12.1915	8.29402
ENSMUST00000021379.7	ENSMUSG00000060121	Gemin2	protein_coding	1.85663e-06	0.000139421	0.53338	0.111856	5.97856	0.0987017	0.00355801	0.0131336	0.0152098	0.0152098	7.1384	5.3784	7.13501	10.3485	10.9593	11.4077
ENSMUST00000111855.4	ENSMUSG00000047731	Wbp1l	protein_coding	1.86589e-06	0.000139894	-0.895955	0.187932	6.66866	0.260064	0.0416467	-0.0175921	0.0113312	0.0113312	7.51967	9.01374	8.40371	2.72435	3.40393	4.04518
ENSMUST00000111214.3	ENSMUSG00000073489	Ifi204	protein_coding	1.9033e-06	0.000142473	2.44047	0.512336	4.21647	2.10176	0.0951788	0.298553	0.0580391	0.298553	0.282177	0.137178	0.614411	3.02221	5.70372	2.15447
ENSMUST00000186129.6	ENSMUSG00000026193	Fn1	protein_coding	1.95899e-06	0.00014641	-1.50634	0.316618	9.37493	0.801018	0.00533934	0.145031	0.00769286	0.145031	57.7331	110.454	89.1989	11.4749	27.7377	18.9473
ENSMUST00000066058.7	ENSMUSG00000033902	Mapkbp1	protein_coding	1.97033e-06	0.000147024	-0.434972	0.091449	6.83965	0.0667957	0.00128033	0.011264	0.0106399	0.011264	4.5518	3.96355	4.44705	2.92239	3.04679	2.36132
ENSMUST00000027533.8	ENSMUSG00000026308	Klhl30	protein_coding	2.00511e-06	0.000149384	-0.714848	0.150402	5.10324	0.165937	0.00764895	0.00814483	0.0262823	0.0262823	2.23378	2.0159	1.63254	1.00189	0.834068	0.993158
ENSMUST00000025835.5	ENSMUSG00000024900	Cpt1a	protein_coding	2.10361e-06	0.000156475	-0.382564	0.0806551	7.38413	0.048342	0.0006581	0.00488618	0.00909978	0.00909978	11.7063	13.7255	12.5128	9.26868	8.28357	8.02552
ENSMUST00000055071.8	ENSMUSG00000079017	Ifi27l2a	protein_coding	2.11912e-06	0.000157382	2.83411	0.597697	3.3463	2.83834	0.229472	0.30639	0.21275	0.30639	0.190024	0.963765	1.26673	11.8967	17.5665	6.90779
ENSMUST00000001304.8	ENSMUSG00000001270	Ckb	protein_coding	2.14055e-06	0.000158723	-0.526637	0.111112	9.26072	0.0980193	0.000102264	0.0184167	0.00760046	0.0184167	305.065	222.313	243.078	149.439	135.686	162.294
ENSMUST00000105866.2	ENSMUSG00000078521	Aunip	protein_coding	2.15076e-06	0.000159231	0.667896	0.140945	5.2332	0.145004	0.00574127	0.0082316	0.0240568	0.0240568	2.88479	3.05827	3.81498	6.30045	6.31346	6.04003
ENSMUST00000093976.3	ENSMUSG00000046561	Arsj	protein_coding	2.15534e-06	0.00015932	0.888332	0.18748	4.90851	0.278918	0.0102449	0.042478	0.0301434	0.042478	0.473679	0.764132	0.784056	1.66463	1.79903	1.3197
ENSMUST00000028610.9	ENSMUSG00000027187	Cat	protein_coding	2.1596e-06	0.000159386	-0.36844	0.0777646	7.67865	0.0445835	0.000608684	0.00421518	0.00846232	0.00846232	30.2974	28.7478	30.8612	18.5358	21.9791	20.9947
ENSMUST00000121493.8	ENSMUSG00000058056	Palld	protein_coding	2.18576e-06	0.000161064	-0.586489	0.123851	7.0288	0.121598	0.00441033	0.0185983	0.0100249	0.0185983	7.6288	8.69658	6.54604	3.41212	4.49069	4.71797
ENSMUST00000028763.9	ENSMUSG00000027298	Tyro3	protein_coding	2.20296e-06	0.000162079	0.43824	0.0925757	6.63557	0.0631157	0.00137112	0.00550317	0.0114843	0.0114843	3.75319	3.62916	4.24984	6.24713	5.65736	5.89657
ENSMUST00000115026.7	ENSMUSG00000029761	Cald1	protein_coding	2.2115e-06	0.000162454	-0.406147	0.0858106	10.7571	0.0557437	9.70588e-05	0.00772421	0.0109481	0.0109481	440.476	478.704	420.958	256.278	315.772	311.52
ENSMUST00000074370.9	ENSMUSG00000024182	Axin1	protein_coding	2.2189e-06	0.000162744	0.442515	0.0935076	7.0374	0.0642575	0.00311581	0.00377385	0.0099997	0.0099997	6.90599	5.81381	6.21292	10.5389	9.28549	9.32282
ENSMUST00000137543.8	ENSMUSG00000021838	Samd4	protein_coding	2.24372e-06	0.000164182	-0.402889	0.0851751	7.69299	0.0574017	0.000905622	0.00997657	0.00843566	0.00997657	9.9008	12.4496	11.2638	7.43243	8.12649	6.61994
ENSMUST00000036852.8	ENSMUSG00000033762	Recql4	protein_coding	2.24546e-06	0.000164182	0.642572	0.135851	5.59536	0.133527	0.00910584	0.00296622	0.0185774	0.0185774	1.12554	1.32442	1.34897	2.70018	2.25877	2.20291
ENSMUST00000053252.8	ENSMUSG00000048644	Ctxn1	protein_coding	2.25986e-06	0.00016498	-0.417579	0.0883078	7.60339	0.0616696	0.000649172	0.0110482	0.00860881	0.0110482	64.674	54.5428	55.1379	37.5954	33.5641	42.9743
ENSMUST00000130697.7	ENSMUSG00000002325	Irf9	protein_coding	2.27109e-06	0.000165544	1.97521	0.417797	5.53475	1.19258	0.242453	-0.214773	0.0193791	0.0193791	0.881993	1.22471	1.14346	7.90986	8.82879	6.40105
ENSMUST00000063747.11	ENSMUSG00000022568	Scrib	protein_coding	2.29206e-06	0.000166816	0.372949	0.0789176	7.80408	0.0468938	0.00109979	0.00535824	0.0082422	0.0082422	8.49866	8.80956	9.69462	13.5108	12.0206	13.3261
ENSMUST00000238746.1	ENSMUSG00000021662	Arhgef28	protein_coding	2.32103e-06	0.000168664	-0.515233	0.109084	6.85576	0.0939187	0.00283096	0.0150181	0.0105822	0.0150181	8.67074	7.51932	5.9601	4.55212	3.99948	4.36435
ENSMUST00000051395.8	ENSMUSG00000020493	Prr11	protein_coding	2.3356e-06	0.000169462	0.4016	0.085049	7.05452	0.0546366	0.000899829	0.00691498	0.00995018	0.00995018	7.06003	8.64958	8.47416	11.1773	12.8528	11.4967
ENSMUST00000081111.13	ENSMUSG00000062867	Impdh2	protein_coding	2.34853e-06	0.000170139	0.344461	0.0729659	9.57639	0.0409836	7.53812e-05	0.00665904	0.00791064	0.00791064	201.725	178.132	204.258	281.988	250.609	283.178
ENSMUST00000081339.12	ENSMUSG00000058392	Rrp1b	protein_coding	2.35761e-06	0.000170531	0.539854	0.114374	7.02999	0.10313	0.00924495	0.0103772	0.0100214	0.0103772	4.01765	5.18171	5.27003	7.38042	7.77178	9.31962
ENSMUST00000025542.9	ENSMUSG00000024640	Psat1	protein_coding	2.36116e-06	0.000170531	0.377862	0.0800595	9.8297	0.0505253	0.000512653	0.00910162	0.00829063	0.00910162	174.872	159.722	204.975	257.422	258.466	256.851
ENSMUST00000089157.10	ENSMUSG00000068101	Cenpm	protein_coding	2.42061e-06	0.000174558	0.595204	0.126244	5.66817	0.121294	0.00616657	0.0126006	0.0177398	0.0177398	4.82559	4.96934	6.44968	10.2912	9.44585	9.03901
ENSMUST00000045174.6	ENSMUSG00000039770	Ypel5	protein_coding	2.48084e-06	0.000178628	-0.735169	0.156097	6.10809	0.191381	0.0115515	0.0249979	0.0144364	0.0249979	7.76607	6.15237	6.89635	2.46846	3.91257	3.57559
ENSMUST00000209010.1	ENSMUSG00000040028	Elavl1	protein_coding	2.50613e-06	0.000179901	0.342393	0.0727314	8.34145	0.0362236	0.000322799	0.000994421	0.00761199	0.00761199	50.413	46.9464	48.8279	68.3852	66.3463	68.3741
ENSMUST00000227212.1	ENSMUSG00000115354	Gm49083	lncRNA	2.50378e-06	0.000179901	-0.974597	0.207016	4.38733	0.298104	0.0165772	-0.000136118	0.0477065	0.0477065	1.73788	1.82208	1.63537	0.560687	0.598878	0.778579
ENSMUST00000049424.10	ENSMUSG00000042729	Wdr74	protein_coding	2.51056e-06	0.000179945	0.435268	0.0924672	7.78029	0.0670978	0.000782696	0.0120426	0.00828169	0.0120426	50.4521	42.1354	52.5598	76.5386	67.0264	77.3871
ENSMUST00000080371.7	ENSMUSG00000022353	Mtss1	protein_coding	2.53052e-06	0.000181101	-0.630486	0.133985	5.61429	0.131878	0.00858045	0.00720001	0.0183474	0.0183474	1.89155	2.46693	2.05512	1.17127	1.2375	0.962792
ENSMUST00000071592.11	ENSMUSG00000060098	Prmt7	protein_coding	2.55417e-06	0.000182517	0.351442	0.0747152	7.98971	0.0433046	0.00040456	0.00740932	0.00796898	0.00796898	19.946	17.4123	19.4247	28.4197	24.1128	27.2713
ENSMUST00000025704.2	ENSMUSG00000024791	Cdca5	protein_coding	2.57655e-06	0.000183838	0.566324	0.120444	6.24603	0.109252	0.00809036	0.00820312	0.0136697	0.0136697	4.98254	5.78015	6.28315	11.4248	9.06169	9.22813
ENSMUST00000182625.1	ENSMUSG00000051817	Sox12	protein_coding	2.68262e-06	0.000191118	0.479273	0.102109	7.20216	0.0814225	0.000842414	0.014797	0.0095502	0.014797	5.42614	5.68566	6.85028	10.6795	9.06549	9.04994
ENSMUST00000107131.1	ENSMUSG00000044303	Cdkn2a	protein_coding	2.69226e-06	0.000191366	-0.748506	0.159494	6.66768	0.198604	0.00175557	0.036402	0.0113356	0.036402	45.7727	37.6793	37.887	16.4379	16.0436	25.3378
ENSMUST00000005607.8	ENSMUSG00000005470	Asf1b	protein_coding	2.69827e-06	0.000191366	0.405938	0.086507	7.03371	0.0543998	0.00121471	0.00499037	0.0100105	0.0100105	15.5592	13.8476	15.9643	23.9195	22.3866	20.9749
ENSMUST00000020546.2	ENSMUSG00000020303	Stc2	protein_coding	2.69816e-06	0.000191366	1.01605	0.216523	5.25302	0.365965	0.0110144	0.0593091	0.0237333	0.0593091	0.565505	0.815614	1.10106	2.58517	1.98619	2.03765
ENSMUST00000046746.9	ENSMUSG00000036256	Igfbp7	protein_coding	2.7053e-06	0.000191577	-0.335404	0.071484	8.97392	0.0395029	0.000202577	0.00699023	0.00746236	0.00746236	267.223	277.97	215.778	173.023	180.831	181.533
ENSMUST00000234700.1	ENSMUSG00000024074	Crim1	protein_coding	2.73222e-06	0.000193194	-0.537176	0.114537	6.24655	0.0910833	0.00601124	-0.000366451	0.0136668	0.0136668	8.13717	6.94887	7.19275	4.06631	4.2344	4.58406
ENSMUST00000216872.1	ENSMUSG00000001349	Cnn1	protein_coding	2.74103e-06	0.000193527	-0.522027	0.111322	8.36723	0.0966249	0.000708303	0.0178807	0.00759372	0.0178807	232.965	188.773	223.362	119.902	111.252	146.499
ENSMUST00000045743.12	ENSMUSG00000038205	Prkab2	protein_coding	2.77424e-06	0.000195579	-0.500317	0.106749	6.31104	0.0785151	0.00378546	0.000489723	0.0133075	0.0133075	3.97987	4.54395	4.12586	2.44946	2.74614	2.36307
ENSMUST00000027697.11	ENSMUSG00000026437	Cdk18	protein_coding	2.80055e-06	0.00019714	-0.437744	0.0934366	6.7793	0.0616635	0.00222907	0.00299298	0.0108665	0.0108665	6.86627	6.39155	6.1015	4.40295	3.72993	4.25134
ENSMUST00000191436.6	ENSMUSG00000022587	Ly6e	protein_coding	2.86335e-06	0.000201261	0.338561	0.0723361	8.40867	0.0400676	0.000282203	0.00681847	0.00756656	0.00756656	97.9786	105.364	114.637	158.06	139.767	140.334
ENSMUST00000093902.11	ENSMUSG00000070327	Rnf213	protein_coding	2.90427e-06	0.000203799	1.49757	0.320166	7.12748	0.795821	0.0157515	0.138008	0.00974704	0.138008	0.616362	1.38788	0.982387	4.78816	5.6224	2.68159
ENSMUST00000238147.1	ENSMUSG00000035783	Acta2	protein_coding	2.90809e-06	0.000203799	-0.661662	0.141465	10.2267	0.155354	0.000293735	0.0297249	0.00915591	0.0297249	1575.01	1496.5	1722.07	674.023	763.911	1030.37
ENSMUST00000068044.13	ENSMUSG00000022094	Slc39a14	protein_coding	2.92476e-06	0.000204664	0.374808	0.0801551	7.47007	0.045547	0.000741217	0.00351212	0.00889605	0.00889605	8.03736	8.71968	8.44291	13.1273	12.0152	11.0958
ENSMUST00000072329.14	ENSMUSG00000057531	Dtnbp1	protein_coding	2.94744e-06	0.000205642	0.381965	0.0817134	7.59085	0.0477017	0.00138135	0.00353423	0.00863428	0.00863428	37.2716	36.429	32.7023	56.2637	48.0125	49.7251
ENSMUST00000055458.5	ENSMUSG00000045664	Cdc42ep2	protein_coding	2.94566e-06	0.000205642	0.478693	0.102404	6.21651	0.0768558	0.00189717	0.00824237	0.0138326	0.0138326	3.40524	3.23119	3.14256	6.03803	4.99255	4.63733
ENSMUST00000106956.9	ENSMUSG00000061086	Myl4	protein_coding	2.95817e-06	0.000206086	-1.13667	0.243206	5.02419	0.415913	0.0609685	-0.0255874	0.0277555	0.0277555	11.0507	7.56009	10.1832	2.66034	3.65901	2.75511
ENSMUST00000058011.7	ENSMUSG00000002870	Mcm2	protein_coding	2.98607e-06	0.000207723	0.431811	0.0924298	8.60176	0.0661903	0.000220339	0.0125946	0.0074754	0.0125946	30.5168	33.84	38.4332	57.8041	49.1896	49.0829
ENSMUST00000112640.7	ENSMUSG00000026389	Steap3	protein_coding	3.00598e-06	0.000208801	0.605589	0.129665	5.95531	0.130197	0.0050448	0.0201747	0.0153596	0.0201747	2.59092	2.74867	2.92141	6.32713	4.62029	4.23323
ENSMUST00000053699.12	ENSMUSG00000035093	Secisbp2l	protein_coding	3.01848e-06	0.000209361	-0.579217	0.124041	6.89007	0.119111	0.00129391	0.0217854	0.010463	0.0217854	5.66865	6.8746	4.94083	2.8213	3.80254	3.01338
ENSMUST00000116578.7	ENSMUSG00000031387	Renbp	protein_coding	3.10167e-06	0.000214816	-0.412311	0.0884034	7.27239	0.0603783	0.00149527	0.0102275	0.00937274	0.0102275	38.3188	33.6456	39.8236	24.4504	21.7214	26.9777
ENSMUST00000026902.8	ENSMUSG00000025795	Rassf3	protein_coding	3.1132e-06	0.000214984	-0.444561	0.0953338	6.98049	0.0701967	0.00113676	0.012496	0.0101703	0.012496	13.0205	9.72766	9.80851	6.6229	6.89223	6.9589
ENSMUST00000236665.1	ENSMUSG00000024037	Wdr4	protein_coding	3.11101e-06	0.000214984	0.568375	0.121881	6.54387	0.102057	0.0103345	-0.00390742	0.011948	0.011948	7.89364	7.73369	6.42212	12.5398	12.2242	13.5976
ENSMUST00000066177.9	ENSMUSG00000034101	Ctnnd1	protein_coding	3.14183e-06	0.000216644	-0.399889	0.0857888	8.28748	0.050973	0.00338591	0.000363587	0.00765365	0.00765365	26.3783	29.2255	25.9317	19.401	17.8394	16.8781
ENSMUST00000038128.14	ENSMUSG00000034659	Tmem109	protein_coding	3.15458e-06	0.000217206	0.344107	0.0738349	8.2545	0.0420648	0.000275437	0.00790196	0.00768141	0.00790196	39.0069	38.3439	41.2493	62.5381	52.5735	50.8964
ENSMUST00000000028.13	ENSMUSG00000000028	Cdc45	protein_coding	3.16129e-06	0.000217352	0.482158	0.103466	6.71826	0.0736545	0.00494352	-5.38262e-05	0.0111143	0.0111143	8.98557	8.30863	9.14514	15.2903	13.4753	13.5668
ENSMUST00000235594.1	ENSMUSG00000024899	Papss2	protein_coding	3.17685e-06	0.000218104	-0.619898	0.133053	5.79082	0.136526	0.00979784	0.0167567	0.016576	0.0167567	6.02077	5.83529	6.91446	2.69381	3.36001	4.03412
ENSMUST00000101212.8	ENSMUSG00000072944	Nup62cl	protein_coding	3.21632e-06	0.000220493	-1.34903	0.289709	4.46891	0.646683	0.0252529	0.100644	0.0438367	0.100644	4.0209	2.58008	2.61989	0.471303	0.852605	1.09896
ENSMUST00000080015.11	ENSMUSG00000056116	H2-T22	protein_coding	3.29153e-06	0.000225322	0.574059	0.123407	7.20868	0.117138	0.00395129	0.0188928	0.00953346	0.0188928	20.1372	13.6122	16.7431	29.5195	31.0395	26.708
ENSMUST00000048260.14	ENSMUSG00000041891	Lman1	protein_coding	3.3059e-06	0.000225978	0.419773	0.0902575	7.39826	0.0593246	0.00315391	0.0049233	0.00906572	0.00906572	11.5727	11.0949	10.9772	18.5336	17.5312	14.6074
ENSMUST00000154184.4	ENSMUSG00000025647	Shisa5	protein_coding	3.32746e-06	0.000227123	0.916643	0.197149	5.73515	0.298711	0.0312394	0.0270621	0.0170705	0.0270621	5.59484	5.70443	6.1208	15.4875	19.3288	9.93385
ENSMUST00000164309.2	ENSMUSG00000005410	Mcm5	protein_coding	3.34248e-06	0.000227819	0.447324	0.0962283	7.00134	0.0693727	0.00378313	0.0078958	0.0101067	0.0101067	7.01424	6.9653	7.91938	9.69875	12.0044	12.1276
ENSMUST00000162096.7	ENSMUSG00000066861	Oas1g	nonsense_mediated_decay	3.37449e-06	0.00022967	3.82258	0.822661	2.25335	5.01764	0.368522	0.423992	0.646633	0.646633	0	0.0112809	0.0904848	1.4834	1.62001	0.783207
ENSMUST00000000476.14	ENSMUSG00000029231	Pdgfra	protein_coding	3.41256e-06	0.000231926	1.56046	0.335995	5.93821	0.865978	0.0475891	0.12175	0.0154726	0.12175	0.510042	0.880103	0.978134	4.79398	4.60041	2.07976
ENSMUST00000022904.7	ENSMUSG00000022295	Atp6v1c1	protein_coding	3.43793e-06	0.000233315	-0.392704	0.0845841	7.67401	0.0548502	0.000452385	0.0102793	0.00847103	0.0102793	45.4186	40.1415	39.6687	24.2771	28.4064	30.963
ENSMUST00000146598.7	ENSMUSG00000027746	Ufm1	protein_coding	3.57513e-06	0.000241585	-0.398082	0.0858922	7.54812	0.0563936	0.000551658	0.0105145	0.0087235	0.0105145	16.0121	14.4594	15.8463	8.71242	11.0256	11.0216
ENSMUST00000064883.13	ENSMUSG00000031557	Plekha2	protein_coding	3.57112e-06	0.000241585	-0.659079	0.142199	5.633	0.137705	0.0122022	-0.0029657	0.0181287	0.0181287	2.15635	2.50459	1.90955	1.15036	1.04525	1.13766
ENSMUST00000022946.5	ENSMUSG00000022323	Rida	protein_coding	3.56938e-06	0.000241585	-0.643152	0.13876	5.41126	0.147198	0.00594998	0.0229315	0.021244	0.0229315	13.3915	11.2519	12.1465	4.91219	6.63016	7.58109
ENSMUST00000036759.10	ENSMUSG00000024104	Washc2	protein_coding	3.58449e-06	0.000241871	-0.362349	0.0781915	7.66319	0.0443856	0.000679346	0.00556637	0.00849151	0.00849151	17.9744	16.4444	16.3616	10.3388	12.3143	12.288
ENSMUST00000119475.5	ENSMUSG00000054690	Emcn	protein_coding	3.60453e-06	0.000242877	-1.905	0.411183	4.59028	1.29159	0.0331535	0.220454	0.0390357	0.220454	6.20097	7.98434	5.16083	0.459539	0.922423	1.82265
ENSMUST00000089217.10	ENSMUSG00000001924	Uba1	protein_coding	3.62439e-06	0.000243867	0.415439	0.0896921	8.48768	0.0555319	0.00454477	0.000148933	0.00752225	0.00752225	26.1857	28.5373	26.4561	42.6536	36.6761	42.2969
ENSMUST00000172202.1	ENSMUSG00000091021	Gm17300	lncRNA	3.6327e-06	0.000244078	0.564658	0.121921	5.63987	0.10805	0.0042464	0.0112512	0.0180505	0.0180505	4.97143	3.95457	4.72761	7.64766	7.23989	8.91293
ENSMUST00000058137.8	ENSMUSG00000015087	Rabl6	protein_coding	3.69921e-06	0.000248194	0.342908	0.0741006	8.09723	0.0415041	0.000398217	0.00738719	0.00783812	0.00783812	23.4682	20.3822	23.1256	34.3227	29.829	29.3787
ENSMUST00000030903.11	ENSMUSG00000029036	Atad3a	protein_coding	3.73871e-06	0.000250134	0.343933	0.0743574	8.00856	0.0401859	0.000348915	0.00552477	0.00794461	0.00794461	26.2889	29.0562	28.4749	42.5422	35.5218	38.9849
ENSMUST00000217055.1	ENSMUSG00000032399	Rpl4	retained_intron	3.73768e-06	0.000250134	-0.60605	0.131025	5.60959	0.13079	0.00646271	0.0192886	0.0184037	0.0192886	15.7413	15.4668	15.714	6.51642	9.15884	9.88681
ENSMUST00000047860.8	ENSMUSG00000036285	Noa1	protein_coding	3.78204e-06	0.000251998	0.402361	0.0870343	6.97884	0.0501023	0.00118706	0.000730587	0.0101754	0.0101754	11.052	11.5406	9.91	16.3737	15.736	15.8262
ENSMUST00000022428.12	ENSMUSG00000021876	Rnase4	protein_coding	3.78259e-06	0.000251998	-0.392212	0.0848397	7.11815	0.0540926	0.00102431	0.0089049	0.00977235	0.00977235	30.8992	34.193	33.3327	19.6605	25.4201	20.8164
ENSMUST00000114195.7	ENSMUSG00000053062	Jam2	protein_coding	3.77869e-06	0.000251998	-0.656319	0.141962	5.41156	0.15341	0.00668184	0.023548	0.0212394	0.023548	2.21729	2.52039	1.84911	0.948467	1.40634	1.02975
ENSMUST00000193073.1	ENSMUSG00000026078	Pdcl3	retained_intron	3.82647e-06	0.000254238	-0.407583	0.0882101	7.65591	0.0591744	0.000470219	0.0112013	0.00850541	0.0112013	112.798	95.1681	95.0357	58.2792	66.6836	74.6865
ENSMUST00000079772.3	ENSMUSG00000063727	Tnfrsf11b	protein_coding	3.82697e-06	0.000254238	-0.671656	0.145362	6.44667	0.160693	0.00180402	0.0298913	0.0125117	0.0298913	9.40507	11.4064	9.37769	3.84726	5.89893	5.68122
ENSMUST00000043419.9	ENSMUSG00000078812	Eif5a	protein_coding	3.85209e-06	0.000255547	0.571545	0.123732	6.77092	0.103553	0.0120651	-0.00512307	0.0108994	0.0108994	12.6239	15.561	12.5035	24.2391	22.875	23.7906
ENSMUST00000111899.7	ENSMUSG00000055491	Pprc1	protein_coding	3.86643e-06	0.000256139	0.444797	0.096309	7.4753	0.0676188	0.00502905	0.00530281	0.00888408	0.00888408	6.06274	7.82191	6.78923	11.4532	10.1505	10.1966
ENSMUST00000226023.1	ENSMUSG00000044258	Ctla2a	processed_transcript	3.98085e-06	0.000263349	-0.975728	0.211545	5.51772	0.339315	0.0170268	0.0501004	0.0196238	0.0501004	22.6277	23.6445	23.8109	5.69175	9.72393	11.3925
ENSMUST00000148587.7	ENSMUSG00000087203	Gm13986	lncRNA	4.05744e-06	0.000268041	-0.988551	0.21451	4.33927	0.329617	0.0187435	0.0268148	0.0502782	0.0502782	1.31074	1.03045	1.13562	0.303756	0.478327	0.504261
ENSMUST00000026125.2	ENSMUSG00000025134	Alyref	protein_coding	4.07254e-06	0.000268663	0.356523	0.0773764	7.74607	0.0394443	0.000640328	0.000999366	0.00834033	0.00834033	16.4521	16.8978	17.0556	24.9527	22.8298	23.2868
ENSMUST00000028059.8	ENSMUSG00000026727	Rsu1	protein_coding	4.11416e-06	0.00027103	-0.329374	0.0715172	8.60365	0.0340842	0.000197256	0.00172523	0.0074748	0.0074748	132.338	128.52	134.478	89.5677	92.6055	98.2281
ENSMUST00000029635.13	ENSMUSG00000028005	Gucy1b1	protein_coding	4.19468e-06	0.000275949	-0.826466	0.179608	5.75994	0.243624	0.00404553	0.044343	0.016844	0.044343	4.79973	4.65996	4.64892	1.44697	2.13036	2.68001
ENSMUST00000005017.14	ENSMUSG00000004897	Hdgf	protein_coding	4.21183e-06	0.000276692	0.401168	0.0871981	9.87184	0.0574049	6.64671e-05	0.0113388	0.00836612	0.0113388	185.282	189.599	209.2	330.763	267.886	268.217
ENSMUST00000005003.11	ENSMUSG00000004880	Lbr	protein_coding	4.29834e-06	0.000281983	0.502827	0.109396	6.92522	0.0902113	0.00133273	0.0166184	0.0103458	0.0166184	6.25617	8.22628	7.08781	12.5471	12.7828	9.82499
ENSMUST00000094216.4	ENSMUSG00000070462	Tlnrd1	protein_coding	4.3043e-06	0.000281983	0.469942	0.102248	7.32636	0.0787991	0.000720397	0.0149614	0.00923988	0.0149614	8.28172	8.53074	6.0981	12.6277	11.6804	11.5205
ENSMUST00000111045.8	ENSMUSG00000048482	Bdnf	protein_coding	4.34086e-06	0.000283983	-0.683109	0.148684	6.61967	0.16652	0.00260869	0.0305519	0.0115604	0.0305519	9.82404	9.85364	6.97338	3.64223	4.38465	5.18682
ENSMUST00000044730.11	ENSMUSG00000038437	Mllt6	protein_coding	4.36365e-06	0.00028508	0.470029	0.10233	6.6021	0.07336	0.00406058	0.00479164	0.0116466	0.0116466	1.85969	2.0067	2.01087	3.55846	2.91476	2.89722
ENSMUST00000056089.7	ENSMUSG00000050777	Tmem37	protein_coding	4.4029e-06	0.000287247	-0.755151	0.164471	6.44048	0.203537	0.00168477	0.0388912	0.0125498	0.0388912	26.0791	16.7629	17.7515	8.79496	8.11257	10.8583
ENSMUST00000133567.1	ENSMUSG00000045573	Penk	protein_coding	4.42039e-06	0.00028799	1.91187	0.416477	3.87352	1.20345	0.165374	-0.0317799	0.0948064	0.0948064	0.634151	0.891548	1.25863	8.20628	7.09196	3.85634
ENSMUST00000205428.1	ENSMUSG00000054342	Kcnn4	protein_coding	4.49289e-06	0.00029231	0.672151	0.146528	5.63429	0.161301	0.0111201	0.0210857	0.018114	0.0210857	2.26191	3.14504	2.78695	6.1919	4.30003	5.39169
ENSMUST00000030811.1	ENSMUSG00000028967	Errfi1	protein_coding	4.55691e-06	0.000296068	0.845066	0.184343	8.18134	0.25502	0.000549456	0.0504238	0.00774926	0.0504238	24.2678	31.6874	16.4787	50.1495	55.5095	55.341
ENSMUST00000065797.6	ENSMUSG00000027221	Chst1	protein_coding	4.59613e-06	0.000298206	0.587167	0.128135	5.52853	0.123132	0.00489058	0.0197372	0.0194674	0.0197372	1.75358	1.795	1.85745	4.12272	2.82856	2.87585
ENSMUST00000059352.2	ENSMUSG00000048096	Lmod1	protein_coding	4.61583e-06	0.000299073	-0.329608	0.0719428	8.44171	0.0382872	0.000216802	0.00690167	0.00754685	0.00754685	35.5736	36.2414	37.9243	29.3347	24.5177	24.407
ENSMUST00000058714.9	ENSMUSG00000047139	Cd24a	protein_coding	4.65182e-06	0.000300992	-0.757523	0.165401	8.11542	0.204981	0.000313642	0.0407228	0.00781791	0.0407228	112.008	94.9304	79.7876	35.9436	41.138	56.4805
ENSMUST00000137012.1	ENSMUSG00000019768	Esr1	processed_transcript	4.70262e-06	0.000303862	-0.38494	0.0840914	7.32534	0.0482403	0.00136468	0.00336874	0.00924236	0.00924236	61.9749	58.5447	50.3139	37.6695	36.997	39.4202
ENSMUST00000027989.12	ENSMUSG00000026675	Hsd17b7	protein_coding	4.7664e-06	0.000307563	-0.405619	0.0886634	6.91826	0.0571366	0.00142318	0.00830013	0.0103686	0.0103686	7.40744	9.41052	8.40911	4.99144	5.6017	5.91498
ENSMUST00000031144.13	ENSMUSG00000029234	Tmem165	protein_coding	4.79984e-06	0.000309298	0.361944	0.0791419	7.50747	0.0404385	0.000583368	0.000838481	0.0088118	0.0088118	26.9469	25.6256	24.1361	36.9708	36.282	35.1155
ENSMUST00000028580.11	ENSMUSG00000027160	Ccdc34	protein_coding	4.83223e-06	0.000310961	0.440717	0.096396	6.46606	0.0607404	0.00154544	0.00154332	0.0123928	0.0123928	9.01021	8.1863	8.91358	13.5237	13.819	12.5466
ENSMUST00000093110.11	ENSMUSG00000029659	Medag	protein_coding	4.88908e-06	0.000314191	1.15857	0.253545	5.95955	0.479829	0.0230728	0.0733549	0.015332	0.0733549	1.49289	2.79176	2.61768	6.47164	9.56633	5.53624
ENSMUST00000220627.1	ENSMUSG00000072825	Cep170b	protein_coding	4.92116e-06	0.000315395	-0.72709	0.159166	6.54191	0.165703	0.0260421	-0.0171608	0.0119586	0.0119586	4.12454	5.05843	4.15117	2.20654	1.94155	2.21149
ENSMUST00000004055.9	ENSMUSG00000042156	Dzip1	protein_coding	4.91636e-06	0.000315395	-0.593378	0.12989	5.80967	0.125875	0.00739311	0.0179138	0.0164195	0.0179138	3.21224	3.67064	2.55335	1.53218	2.01643	1.56953
ENSMUST00000022053.10	ENSMUSG00000021569	Trip13	protein_coding	4.95819e-06	0.000317337	0.493769	0.108127	6.17963	0.079378	0.00350111	0.00429354	0.0140362	0.0140362	3.85011	3.53023	3.22154	5.14508	5.92298	6.0377
ENSMUST00000029188.7	ENSMUSG00000027656	Ccn5	protein_coding	4.9883e-06	0.000318833	1.66326	0.364329	6.89932	0.989218	0.00215324	0.19695	0.0104317	0.19695	4.53106	6.63489	10.3202	50.0429	42.1601	20.8619
ENSMUST00000091703.2	ENSMUSG00000069267	H3c2	protein_coding	5.0151e-06	0.000320112	-1.89835	0.415926	4.81023	1.28872	0.0275328	0.231959	0.0324591	0.231959	29.586	21.4082	10.7706	1.639	2.72648	4.69226
ENSMUST00000106470.7	ENSMUSG00000028691	Prdx1	protein_coding	5.10111e-06	0.000325163	-0.516972	0.113356	7.6845	0.0955976	0.00262248	0.0166521	0.00845139	0.0166521	110.378	109.237	150.147	69.5666	70.9644	73.8714
ENSMUST00000040718.5	ENSMUSG00000038280	Ostm1	protein_coding	5.11703e-06	0.000325739	-0.516509	0.113271	5.81272	0.0913464	0.00285079	0.0112893	0.0163947	0.0163947	4.23426	5.44434	4.21417	2.5145	3.05842	2.559
ENSMUST00000066509.9	ENSMUSG00000036617	Etl4	protein_coding	5.13921e-06	0.00032641	-0.760491	0.16681	5.74788	0.204609	0.0247855	0.0140952	0.0169529	0.0169529	1.55072	1.90811	1.88745	0.637216	1.07034	0.806618
ENSMUST00000106296.8	ENSMUSG00000033909	Usp36	protein_coding	5.1414e-06	0.00032641	0.443559	0.0972944	7.21187	0.0703827	0.00346853	0.0107308	0.0095253	0.0107308	4.28068	4.96337	5.42263	8.49142	7.08767	7.0032
ENSMUST00000112362.2	ENSMUSG00000026437	Cdk18	protein_coding	5.24382e-06	0.000332465	-0.643232	0.141221	5.79126	0.148056	0.0103623	0.0195528	0.0165722	0.0195528	7.31275	6.68683	7.79235	3.0429	3.67752	4.75148
ENSMUST00000029018.13	ENSMUSG00000027514	Zbp1	protein_coding	5.27024e-06	0.000333692	3.52545	0.774189	2.50063	4.44789	0.147943	0.751111	0.523448	0.751111	0.0542257	0	0.0530104	1.44867	1.23888	0.550068
ENSMUST00000191104.6	ENSMUSG00000055322	Tns1	protein_coding	5.30508e-06	0.000335449	-0.41774	0.0917636	9.37216	0.0624567	0.000547207	0.0120836	0.00769036	0.0120836	30.5544	39.2562	38.8578	24.9018	23.3825	22.2328
ENSMUST00000162708.6	ENSMUSG00000036908	Unc93b1	protein_coding	5.32642e-06	0.000336348	0.562683	0.123626	5.72186	0.111246	0.00572851	0.0145992	0.0171965	0.0171965	2.55891	2.92517	2.66636	5.21849	5.33867	3.76816
ENSMUST00000213770.1	ENSMUSG00000035443	Thyn1	protein_coding	5.35286e-06	0.000337566	-0.450501	0.0990012	7.33322	0.0726469	0.00136704	0.0133348	0.00922315	0.0133348	100.412	82.8458	94.3379	50.2802	62.2558	61.9344
ENSMUST00000063116.9	ENSMUSG00000048450	Msx1	protein_coding	5.43343e-06	0.00034219	0.907453	0.199558	5.2759	0.294829	0.00463438	0.0551007	0.0233641	0.0551007	2.09616	1.55313	1.57218	5.92164	3.88024	3.26808
ENSMUST00000065060.11	ENSMUSG00000020023	Tmcc3	protein_coding	5.45043e-06	0.000342804	-0.359999	0.0791788	7.56126	0.0424392	0.000708263	0.00374094	0.00869567	0.00869567	11.43	13.4024	11.2384	7.86308	8.36576	8.53138
ENSMUST00000027861.5	ENSMUSG00000026574	Dpt	protein_coding	5.49771e-06	0.000345317	2.34389	0.515726	3.40304	1.96731	0.0717756	0.327184	0.196194	0.327184	0.0678138	0.202392	0.274997	2.31864	2.40909	0.883919
ENSMUST00000032264.8	ENSMUSG00000030161	Gabarapl1	protein_coding	5.53886e-06	0.000347441	-0.34963	0.0769556	7.83394	0.0408564	0.00068916	0.00454091	0.0081941	0.0081941	50.0038	43.2798	47.5115	34.4474	30.9156	32.9458
ENSMUST00000056292.7	ENSMUSG00000048100	Taf13	processed_transcript	5.60476e-06	0.000351108	-0.52136	0.114817	5.90128	0.0842494	0.00404857	-0.000667729	0.015726	0.015726	9.59386	9.99296	9.69419	5.20374	5.8859	6.07118
ENSMUST00000194552.1	ENSMUSG00000026078	Pdcl3	protein_coding	5.62022e-06	0.00035161	-0.433566	0.095495	6.59117	0.067337	0.00130304	0.0123759	0.0117012	0.0123759	51.8662	46.1266	47.9648	26.6327	32.0293	35.6608
ENSMUST00000031367.14	ENSMUSG00000029416	Slc15a4	protein_coding	5.66079e-06	0.000353212	0.459728	0.101291	6.64891	0.0682788	0.00396814	0.00212402	0.0114217	0.0114217	6.81258	5.80157	5.74281	10.1477	9.29288	9.21342
ENSMUST00000169385.2	ENSMUSG00000022246	Rai14	protein_coding	5.6565e-06	0.000353212	-0.486832	0.107259	7.83374	0.0849071	0.00688114	0.0103757	0.0081944	0.0103757	17.8859	21.6218	20.1019	10.0202	14.0001	12.2442
ENSMUST00000238582.1	ENSMUSG00000068314	Gm6899	TEC	5.71535e-06	0.000356146	-0.491174	0.108268	6.07252	0.0772862	0.0029423	0.00319593	0.0146406	0.0146406	11.1617	9.67063	10.2593	6.83136	5.95745	6.00299
ENSMUST00000023146.4	ENSMUSG00000022503	Nubp1	protein_coding	5.79157e-06	0.00036042	0.357317	0.0788107	7.63036	0.0416335	0.000761652	0.00340199	0.00855504	0.00855504	22.8615	20.9318	20.7484	32.7737	28.2528	30.2843
ENSMUST00000034965.7	ENSMUSG00000032398	Snapc5	protein_coding	5.82634e-06	0.000362107	-0.695684	0.153485	5.02526	0.163313	0.00760159	0.0150487	0.0277348	0.0277348	6.95409	5.0755	6.29558	3.00666	3.36744	2.61231
ENSMUST00000050562.5	ENSMUSG00000050370	Ch25h	protein_coding	5.8344e-06	0.000362132	0.516333	0.113923	5.91083	0.0873061	0.00380847	0.00534919	0.0156592	0.0156592	6.07382	6.16159	7.21211	9.94757	11.6602	10.6127
ENSMUST00000020970.9	ENSMUSG00000020641	Rsad2	protein_coding	5.978e-06	0.000370558	2.32066	0.512607	3.26892	1.84506	0.15752	0.12926	0.23663	0.23663	0.031426	0.102468	0.0827419	0.721989	1.10608	0.4088
ENSMUST00000112459.3	ENSMUSG00000026896	Ifih1	protein_coding	6.01087e-06	0.000372107	1.239	0.273752	4.81835	0.550468	0.0312217	0.0811888	0.0322557	0.0811888	0.522051	0.6135	0.603193	1.22078	3.13919	2.02709
ENSMUST00000035214.10	ENSMUSG00000032594	Ip6k1	protein_coding	6.03951e-06	0.00037339	0.343162	0.0758368	7.84704	0.039375	0.000453335	0.00460542	0.0081735	0.0081735	13.2336	11.2871	12.3124	17.8244	16.3231	17.1512
ENSMUST00000021661.12	ENSMUSG00000021235	Coq6	protein_coding	6.05342e-06	0.000373761	0.401721	0.0887878	6.91659	0.0528547	0.00145076	0.00410004	0.0103741	0.0103741	15.2392	13.8132	14.8481	21.3849	19.9502	23.3741
ENSMUST00000163623.2	ENSMUSG00000021365	Nedd9	protein_coding	6.07894e-06	0.000374847	-0.364066	0.080481	7.41198	0.0448698	0.000683069	0.00570027	0.00903271	0.00903271	11.6779	13.6797	12.0299	8.57879	9.34166	7.75818
ENSMUST00000239015.1	ENSMUSG00000008140	Emc10	protein_coding	6.11621e-06	0.000376163	0.498818	0.110301	8.02376	0.0892455	0.00362165	0.0146279	0.00792541	0.0146279	40.1853	34.3021	27.8866	61.6717	51.1594	52.6826
ENSMUST00000049057.4	ENSMUSG00000034685	Fam171a2	protein_coding	6.11308e-06	0.000376163	0.546211	0.120778	6.30086	0.107009	0.00229856	0.0195824	0.0133647	0.0195824	3.71193	3.59713	2.52352	6.1303	5.16141	5.38694
ENSMUST00000044795.7	ENSMUSG00000039509	Nup133	protein_coding	6.13544e-06	0.000376855	0.367768	0.0813345	7.41444	0.0432061	0.000896167	0.00239155	0.00902678	0.00902678	6.40118	6.74819	7.32068	10.0651	9.57529	9.50353
ENSMUST00000005490.9	ENSMUSG00000005357	Slc1a6	protein_coding	6.16819e-06	0.000378375	-0.378204	0.0836635	7.2251	0.051311	0.000595178	0.00990419	0.00949154	0.00990419	26.6043	21.6321	20.9198	16.688	14.3786	15.5952
ENSMUST00000150848.7	ENSMUSG00000068036	Afdn	protein_coding	6.18909e-06	0.000379164	-5.0769	1.12325	1.8453	8.36435	1.01849	-0.228651	0.874048	0.874048	1.18184	0.572759	0.0984464	0	0	6.61677e-09
ENSMUST00000107123.9	ENSMUSG00000020923	Ubtf	protein_coding	6.32294e-06	0.000386863	0.453649	0.100469	7.39637	0.0738522	0.00579067	0.0093505	0.00907028	0.0093505	11.0769	12.5498	14.8567	21.007	19.6985	18.745
ENSMUST00000210279.1	ENSMUSG00000037103	Dcaf15	protein_coding	6.33916e-06	0.000387199	0.370558	0.0820773	7.43596	0.0466423	0.00112959	0.00568073	0.00897542	0.00897542	17.0524	15.8476	17.397	25.1241	21.7176	25.559
ENSMUST00000019441.8	ENSMUSG00000019297	Nop9	protein_coding	6.34484e-06	0.000387199	0.336272	0.0744861	8.07061	0.0369729	0.000453568	0.00335806	0.00786869	0.00786869	19.9536	19.5255	19.2341	27.1715	24.9201	29.3187
ENSMUST00000105870.7	ENSMUSG00000037366	Pafah2	protein_coding	6.42695e-06	0.000391704	-0.419959	0.0930795	6.72562	0.0565727	0.00191232	0.00266634	0.0110834	0.0110834	9.11069	9.58031	8.17409	6.19071	5.89011	5.36127
ENSMUST00000040577.4	ENSMUSG00000038046	Mrm3	protein_coding	6.46059e-06	0.000393247	0.511659	0.113432	6.01383	0.084826	0.00431015	0.00354923	0.01499	0.01499	6.63133	5.44567	6.27756	10.2793	9.41625	10.4301
ENSMUST00000027125.6	ENSMUSG00000025981	Coq10b	protein_coding	6.55208e-06	0.00039779	-0.392441	0.0870594	7.35324	0.0552982	0.000587959	0.010781	0.0091745	0.010781	38.8177	41.0152	37.5374	21.8216	28.2733	28.4008
ENSMUST00000049126.12	ENSMUSG00000036766	Dner	protein_coding	6.54496e-06	0.00039779	-0.766508	0.170034	5.35799	0.210954	0.00571408	0.0376532	0.0220677	0.0376532	2.43178	2.3418	2.51355	1.35142	1.28289	0.791188
ENSMUST00000152080.7	ENSMUSG00000019731	Slc35e1	protein_coding	6.6111e-06	0.000400858	0.326472	0.0724554	8.32696	0.0381612	0.000251947	0.00748048	0.00762273	0.00762273	19.9835	21.7301	23.9838	32.2214	28.7312	28.7724
ENSMUST00000020490.12	ENSMUSG00000020257	Wdr82	protein_coding	6.62783e-06	0.000401357	0.343358	0.0762119	7.87979	0.0377575	0.000589012	0.00239745	0.00812337	0.00812337	17.7551	17.5673	17.659	26.5664	24.4426	22.8868
ENSMUST00000221654.1	ENSMUSG00000028677	Rnf220	protein_coding	6.68482e-06	0.000403773	0.572154	0.127047	6.79577	0.117577	0.00684731	0.0173641	0.0108029	0.0173641	7.61618	11.1668	9.54821	17.9596	14.8748	16.2604
ENSMUST00000063084.15	ENSMUSG00000020484	Xbp1	protein_coding	6.67722e-06	0.000403773	0.324773	0.0721121	8.50472	0.0317838	0.000286261	-0.000110547	0.00751397	0.00751397	58.0228	57.0044	56.359	78.8585	77.4264	77.9613
ENSMUST00000070395.8	ENSMUSG00000075528	Aarsd1	protein_coding	6.78925e-06	0.000409557	0.423521	0.0941119	7.13525	0.0644396	0.001497	0.0117886	0.00972609	0.0117886	20.0997	17.8931	21.5855	33.7296	27.0663	28.8803
ENSMUST00000029316.15	ENSMUSG00000027752	Exosc8	protein_coding	6.83257e-06	0.000411645	0.391095	0.0869325	7.02083	0.0522886	0.0012875	0.00671491	0.0100484	0.0100484	23.1888	20.181	24.6861	31.7526	34.8191	32.0033
ENSMUST00000094693.10	ENSMUSG00000021134	Srsf5	protein_coding	6.8917e-06	0.000414678	-0.474613	0.10554	7.27965	0.0809435	0.00388613	0.0128218	0.00935471	0.0128218	35.4138	41.9977	46.5156	22.1021	27.222	26.4338
ENSMUST00000201493.1	ENSMUSG00000107215	Gm43197	TEC	6.90598e-06	0.000415009	-1.12581	0.250371	6.12428	0.455457	0.00262746	0.091401	0.0143448	0.091401	10.3668	12.4825	8.55808	2.09819	3.80396	4.47081
ENSMUST00000015498.8	ENSMUSG00000015354	Pcolce2	protein_coding	7.03561e-06	0.000422262	0.410233	0.0913129	6.83257	0.0556155	0.00184146	0.00456872	0.0106656	0.0106656	5.33494	5.2542	4.91859	8.62587	7.09138	7.38324
ENSMUST00000038946.8	ENSMUSG00000018819	Lsp1	protein_coding	7.25804e-06	0.000435059	0.801541	0.178677	7.82764	0.231051	0.00175776	0.0461304	0.00820411	0.0461304	18.9848	24.3602	32.2383	61.8059	53.1961	48.6633
ENSMUST00000155325.1	ENSMUSG00000025134	Alyref	processed_transcript	7.39652e-06	0.000442798	0.414242	0.0924246	7.33833	0.0617298	0.000869452	0.011944	0.0092107	0.011944	68.9928	69.5017	85.0502	123.819	101.976	108.7
ENSMUST00000020969.4	ENSMUSG00000020638	Cmpk2	protein_coding	7.50718e-06	0.000448853	1.85612	0.414425	3.92804	1.11623	0.170496	-0.0671502	0.0871256	0.0871256	0.215944	0.190373	0.134844	1.08716	1.74372	0.784316
ENSMUST00000092155.11	ENSMUSG00000027966	Col11a1	protein_coding	7.55356e-06	0.000451055	-0.752375	0.168036	7.97195	0.203704	0.000627015	0.0417271	0.0079925	0.0417271	12.4481	19.9003	14.3347	7.67283	8.06242	5.77593
ENSMUST00000022369.8	ENSMUSG00000021823	Vcl	protein_coding	7.587e-06	0.00045248	-0.331887	0.0741396	9.76929	0.0376092	5.63178e-05	0.0056493	0.00818869	0.00818869	103.061	129.439	110.919	79.577	82.9426	79.0575
ENSMUST00000013304.7	ENSMUSG00000013160	Atp6v0d1	protein_coding	7.65947e-06	0.000456226	-0.319017	0.071297	9.03898	0.0357587	0.000142714	0.00639111	0.00748218	0.00748218	199.686	169.819	180.75	135.657	121.047	137.432
ENSMUST00000040844.15	ENSMUSG00000034867	Ankrd27	protein_coding	7.82269e-06	0.000465361	0.355083	0.0794373	7.55584	0.0429605	0.000758325	0.00566074	0.00870711	0.00870711	9.83179	9.99774	10.5288	16.0281	13.4758	13.4336
ENSMUST00000035648.5	ENSMUSG00000032905	Atg12	protein_coding	7.96404e-06	0.000473174	-0.381596	0.0854419	7.0756	0.0519421	0.00106026	0.00926156	0.00989021	0.00989021	10.237	8.85991	9.0995	5.6012	7.1723	6.24495
ENSMUST00000017288.8	ENSMUSG00000017144	Rnd3	protein_coding	8.02802e-06	0.000476376	-0.514464	0.115236	7.72704	0.0953372	0.000529588	0.0193895	0.0083739	0.0193895	32.3814	35.6427	31.8168	15.7215	23.1186	20.769
ENSMUST00000154145.1	ENSMUSG00000027848	Olfml3	retained_intron	8.11527e-06	0.00048095	1.02644	0.230033	6.99044	0.37957	0.00258405	0.0767889	0.0101398	0.0767889	3.17457	4.31552	5.8353	14.9107	12.1939	9.26748
ENSMUST00000123605.8	ENSMUSG00000031730	Dhodh	protein_coding	8.20318e-06	0.00048555	0.491922	0.110301	6.6846	0.0871956	0.00217542	0.016074	0.0112599	0.016074	9.00689	6.85721	8.94821	13.6837	12.0636	14.195
ENSMUST00000117179.8	ENSMUSG00000031565	Fgfr1	protein_coding	8.22626e-06	0.000486073	0.55725	0.124966	7.82294	0.111898	0.00340626	0.0200186	0.00821162	0.0200186	10.453	14.6915	10.9073	23.4326	18.277	20.2127
ENSMUST00000090006.11	ENSMUSG00000025809	Itgb1	protein_coding	8.23259e-06	0.000486073	-0.467176	0.10477	10.2351	0.0786482	0.000165283	0.0163	0.0091782	0.0163	265.072	329.965	273.393	149.926	198.628	189.396
ENSMUST00000067854.9	ENSMUSG00000054676	1600014C10Rik	protein_coding	8.35223e-06	0.000492521	-0.555365	0.124635	6.24036	0.101396	0.00959967	0.0014836	0.013701	0.013701	6.30818	5.56583	6.97739	3.39731	3.38551	3.83278
ENSMUST00000028608.12	ENSMUSG00000027185	Nat10	protein_coding	8.41706e-06	0.000495725	0.391402	0.0878709	7.55037	0.0552243	0.000808175	0.0107738	0.00871871	0.0107738	9.66774	11.4835	12.0572	17.8994	15.3214	15.1544
ENSMUST00000077220.13	ENSMUSG00000033434	Gtpbp6	protein_coding	8.55261e-06	0.000503081	0.457264	0.102736	6.43312	0.0681463	0.00323727	0.0035367	0.0125948	0.0125948	8.73574	8.2257	7.26358	12.4334	11.6197	13.8851
ENSMUST00000037035.11	ENSMUSG00000041135	Ripk2	protein_coding	8.5855e-06	0.000503136	-0.449639	0.101042	6.33104	0.0666362	0.00211981	0.00535959	0.0131943	0.0131943	8.45997	8.3972	7.40481	4.51946	5.27713	5.50473
ENSMUST00000003687.7	ENSMUSG00000021253	Tgfb3	protein_coding	8.58503e-06	0.000503136	-0.393999	0.0885381	9.17862	0.0559774	0.000133765	0.0116247	0.0075474	0.0116247	96.2309	94.3037	89.6214	73.6772	59.2614	55.1384
ENSMUST00000040772.8	ENSMUSG00000024965	Fermt3	protein_coding	8.56742e-06	0.000503136	0.78153	0.175605	4.98342	0.216968	0.0176941	0.0244706	0.0285618	0.0285618	0.765142	1.00115	1.22719	2.13776	2.47053	1.80757
ENSMUST00000107914.9	ENSMUSG00000028464	Tpm2	protein_coding	8.65444e-06	0.000506548	-0.39294	0.0883344	10.3907	0.0556841	3.05256e-05	0.0116739	0.00962356	0.0116739	1078.52	899.79	1071.91	750.417	623.013	651.327
ENSMUST00000017946.5	ENSMUSG00000017802	Retreg3	protein_coding	8.68532e-06	0.000507726	0.358771	0.0806669	7.50052	0.043028	0.000933503	0.00458292	0.00882722	0.00882722	14.1094	12.0987	13.2429	19.0426	17.4141	19.2398
ENSMUST00000115275.7	ENSMUSG00000029769	Ccdc136	protein_coding	8.71649e-06	0.000508918	-0.514288	0.115654	6.07963	0.0953986	0.00422112	0.0158426	0.0145994	0.0158426	5.52752	4.54617	3.99663	3.01974	2.40711	2.81697
ENSMUST00000094663.3	ENSMUSG00000094651	Gal3st2	protein_coding	8.77444e-06	0.000511669	-1.26899	0.285464	3.88931	0.526306	0.0297328	0.0242736	0.0925016	0.0925016	1.34909	0.741914	0.796255	0.256835	0.249894	0.25338
ENSMUST00000113685.9	ENSMUSG00000032366	Tpm1	protein_coding	8.83599e-06	0.000514097	-0.42486	0.0956062	8.13621	0.0651206	0.00161896	0.0120919	0.00779548	0.0120919	105.457	102.006	119.396	63.4951	65.7672	81.2487
ENSMUST00000102841.7	ENSMUSG00000020458	Rtn4	protein_coding	8.83785e-06	0.000514097	-0.665309	0.149716	7.23819	0.155153	0.0241639	0.00378839	0.00945839	0.00945839	13.0683	15.2337	19.2053	6.98794	9.28799	7.6435
ENSMUST00000052939.2	ENSMUSG00000051146	Camk2n2	protein_coding	8.84959e-06	0.000514147	0.661252	0.148812	5.15747	0.138959	0.0078893	0.00183955	0.0253284	0.0253284	2.50906	2.92757	2.4421	5.65774	4.59032	4.95051
ENSMUST00000009102.8	ENSMUSG00000008958	Vps72	protein_coding	8.89644e-06	0.000516234	0.375884	0.0846129	7.539	0.0499138	0.001996	0.00741313	0.00874301	0.00874301	27.6584	27.7694	32.4845	44.4731	38.9749	43.4616
ENSMUST00000034539.11	ENSMUSG00000032040	Dcps	protein_coding	8.95096e-06	0.00051864	0.384386	0.0865524	7.0185	0.0500815	0.00118166	0.00601303	0.0100553	0.0100553	21.1291	20.3796	24.1892	32.9572	30.387	31.6162
ENSMUST00000101205.2	ENSMUSG00000031273	Col4a6	protein_coding	8.95987e-06	0.00051864	-1.03086	0.23213	4.21012	0.359486	0.0223325	0.028524	0.0584942	0.0584942	0.376745	0.448588	0.475734	0.179542	0.177664	0.106601
ENSMUST00000058300.13	ENSMUSG00000030281	Il17rc	protein_coding	9.05694e-06	0.000523617	0.577949	0.130211	5.8092	0.10691	0.00900905	-0.000630386	0.0164234	0.0164234	2.87613	2.51388	2.904	5.36543	4.65932	4.58873
ENSMUST00000041643.4	ENSMUSG00000039849	Pcif1	protein_coding	9.07777e-06	0.00052418	0.403935	0.0910163	6.86547	0.0588897	0.00121545	0.0112105	0.010548	0.0112105	3.15243	3.49778	3.56659	5.89171	4.5891	4.72337
ENSMUST00000075447.13	ENSMUSG00000062300	Nectin2	protein_coding	9.10086e-06	0.000524872	0.358509	0.0807907	7.41296	0.0456816	0.000760383	0.00814326	0.00903033	0.00903033	11.4843	14.6386	12.5944	19.37	17.397	17.844
ENSMUST00000231874.1	ENSMUSG00000046711	Hmga1	protein_coding	9.12671e-06	0.000525721	0.700833	0.157956	7.63238	0.17729	0.00775599	0.0296691	0.00855106	0.0296691	21.8031	22.2181	13.4158	33.8541	37.02	41.4567
ENSMUST00000072576.9	ENSMUSG00000014504	Srp19	protein_coding	9.27259e-06	0.000533473	-0.40238	0.0907594	6.86809	0.0556762	0.00181707	0.00706213	0.0105388	0.0105388	55.5509	52.1791	52.1781	30.1368	36.5527	38.6453
ENSMUST00000128715.7	ENSMUSG00000031557	Plekha2	protein_coding	9.30076e-06	0.000534443	-0.480437	0.108382	6.30547	0.0760805	0.00428109	0.00426206	0.0133388	0.0133388	6.23829	5.71187	5.22128	3.09878	3.63446	3.74824
ENSMUST00000231405.1	ENSMUSG00000116656	Gm49708	retained_intron	9.35615e-06	0.000536972	-1.19164	0.268899	4.99541	0.512768	0.0115449	0.0969151	0.028321	0.0969151	11.3967	13.0152	8.88835	2.04824	3.56056	4.80369
ENSMUST00000129100.7	ENSMUSG00000025089	Gfra1	protein_coding	9.4037e-06	0.000539046	1.11755	0.252244	5.81078	0.45103	0.0226844	0.0727561	0.0164105	0.0727561	0.98348	1.01504	1.95706	4.55555	3.73065	3.16526
ENSMUST00000028148.10	ENSMUSG00000009566	Fpgs	protein_coding	9.44593e-06	0.000540156	0.35698	0.0805919	7.45649	0.0430948	0.000815242	0.00526506	0.00892734	0.00892734	16.6938	16.5692	17.5272	24.5394	21.5661	25.8856
ENSMUST00000023826.4	ENSMUSG00000023064	Sncg	protein_coding	9.43651e-06	0.000540156	-0.561399	0.126735	5.52273	0.102623	0.00454185	0.00554911	0.0195509	0.0195509	13.0512	11.3831	12.2296	7.92486	6.66971	6.20273
ENSMUST00000034946.14	ENSMUSG00000032382	Snx1	protein_coding	9.49879e-06	0.000542522	0.337488	0.0762119	7.81702	0.0368088	0.000491221	0.0028081	0.00822116	0.00822116	31.386	28.1908	31.7343	41.7633	41.6704	42.4202
ENSMUST00000039551.8	ENSMUSG00000038628	Polr3k	protein_coding	9.53054e-06	0.000543678	-0.405452	0.0915746	6.7182	0.0593804	0.0012189	0.01136	0.0111146	0.01136	11.9857	11.6074	11.4053	6.37322	8.40665	8.36344
ENSMUST00000038141.14	ENSMUSG00000035208	Slfn8	protein_coding	9.63238e-06	0.000548825	3.93696	0.889656	1.66464	4.86232	0.201252	0.0642694	0.98598	0.98598	0	0	0.00858598	0.282965	0.385934	0.218207
ENSMUST00000026148.8	ENSMUSG00000025150	Cbr2	protein_coding	9.73691e-06	0.000554112	-0.492468	0.111344	5.99146	0.0804474	0.00346789	0.00614465	0.0151284	0.0151284	13.353	13.6395	13.5076	9.35982	7.15027	8.07089
ENSMUST00000058472.12	ENSMUSG00000042078	Svop	protein_coding	9.75805e-06	0.000554647	-0.858375	0.194094	4.79299	0.266249	0.0140117	0.0424971	0.0328984	0.0424971	1.89637	1.25236	1.13675	0.475793	0.567142	0.727353
ENSMUST00000115609.9	ENSMUSG00000000326	Comt	protein_coding	9.92734e-06	0.000563591	0.622628	0.140906	5.94165	0.139014	0.014332	0.0140605	0.0154497	0.0154497	5.36572	4.08524	3.24724	8.34039	7.22107	7.42115
ENSMUST00000026436.9	ENSMUSG00000025372	Baiap2	protein_coding	9.94378e-06	0.000563847	0.458379	0.103743	6.74374	0.065262	0.00513558	-0.00234994	0.0110085	0.0110085	7.51546	7.29498	7.1827	12.2514	10.6857	11.5306
ENSMUST00000053909.12	ENSMUSG00000032690	Oas2	protein_coding	1.02142e-05	0.000578486	3.30623	0.749272	2.19785	3.95304	0.158003	0.68411	0.676144	0.68411	0	0.011716	0.0313287	0.433814	0.505002	0.16466
ENSMUST00000034830.8	ENSMUSG00000032291	Crabp1	protein_coding	1.02722e-05	0.000581076	0.862763	0.195578	8.8397	0.269209	0.000241529	0.0571343	0.00744237	0.0571343	133.976	173.114	242.292	456.521	406.452	391.368
ENSMUST00000029752.14	ENSMUSG00000028107	Tars2	protein_coding	1.03318e-05	0.000583747	0.369438	0.0837707	7.27566	0.0465856	0.00116168	0.00588862	0.00936462	0.00936462	14.5777	12.4355	13.6178	21.1163	18.5541	18.3799
ENSMUST00000063888.4	ENSMUSG00000052160	Pld4	protein_coding	1.03578e-05	0.000584516	0.95074	0.215609	4.66528	0.326956	0.0176039	0.0521267	0.0365314	0.0521267	0.668526	0.860465	1.23497	2.59683	2.50336	1.85975
ENSMUST00000018476.13	ENSMUSG00000022329	Stk3	protein_coding	1.04289e-05	0.000587825	-0.685082	0.155415	6.15828	0.168839	0.0220761	0.0129709	0.0141546	0.0141546	8.37197	7.36503	7.29319	2.90193	4.84606	3.9151
ENSMUST00000166711.7	ENSMUSG00000022407	Adsl	nonsense_mediated_decay	1.07127e-05	0.000603106	0.37959	0.0862261	7.30086	0.0461616	0.00185008	0.00181866	0.00930233	0.00930233	18.965	17.2608	18.7132	26.0314	25.0867	27.7596
ENSMUST00000057557.13	ENSMUSG00000048170	Mcmbp	protein_coding	1.07609e-05	0.000605095	0.383046	0.0870303	7.21773	0.0525599	0.0018511	0.00882727	0.00951031	0.00951031	7.7271	8.18614	8.12315	13.3387	11.703	9.99843
ENSMUST00000033264.11	ENSMUSG00000030966	Trim21	protein_coding	1.07943e-05	0.000606251	1.00677	0.228779	4.79958	0.330518	0.0457806	-0.0127264	0.0327292	0.0327292	0.886491	0.745578	0.764543	2.21656	2.7107	1.66578
ENSMUST00000161031.1	ENSMUSG00000068245	Phf11d	protein_coding	1.09868e-05	0.000616329	3.7341	0.849281	1.84798	4.94838	0.209471	0.747184	0.872447	0.872447	0	0	0.099454	1.15244	2.69723	0.596444
ENSMUST00000027505.12	ENSMUSG00000026283	Ing5	protein_coding	1.10164e-05	0.000617258	0.427483	0.0972392	6.51394	0.0591424	0.00207008	0.00332984	0.0121131	0.0121131	3.14102	3.75182	3.57663	5.42221	5.48283	4.91032
ENSMUST00000005548.7	ENSMUSG00000005413	Hmox1	protein_coding	1.10359e-05	0.000617617	-0.334245	0.076037	9.09045	0.0404538	0.000102331	0.00857011	0.00750259	0.00857011	213.614	174.447	182.528	135.204	123.9	144.045
ENSMUST00000025290.6	ENSMUSG00000024423	Impact	protein_coding	1.11527e-05	0.000623417	-0.798532	0.181752	7.54389	0.230937	0.000731045	0.0488196	0.00873252	0.0488196	25.2263	26.6946	20.9914	7.68435	11.8009	13.5426
ENSMUST00000107096.1	ENSMUSG00000030744	Rps3	protein_coding	1.16144e-05	0.000648459	0.332641	0.0758639	8.97543	0.0390635	0.00117025	0.00616551	0.00746274	0.00746274	251.602	217.697	243.052	310.227	311.988	358.513
ENSMUST00000022327.12	ENSMUSG00000021798	Ldb3	protein_coding	1.17478e-05	0.000655131	-0.929512	0.21211	4.99267	0.30155	0.0391103	0.0138299	0.0283758	0.0283758	1.54585	1.21098	1.10498	0.411198	0.435516	0.680165
ENSMUST00000052249.6	ENSMUSG00000041632	Mrps27	protein_coding	1.18357e-05	0.000659253	0.342147	0.0781053	7.64169	0.0375903	0.000617783	0.00247073	0.00853287	0.00853287	27.9675	26.1221	28.2363	38.7934	35.9667	39.6316
ENSMUST00000054674.14	ENSMUSG00000044783	Hjurp	protein_coding	1.19093e-05	0.000662572	0.575628	0.131445	7.9395	0.120138	0.000634645	0.0252819	0.00803688	0.0252819	9.99897	13.0108	13.3059	24.6246	21.4676	17.6682
ENSMUST00000236788.1	ENSMUSG00000118032	Gm50147	lncRNA	1.19567e-05	0.000664428	-1.1947	0.272863	3.9046	0.495796	0.0213485	0.0631581	0.0903331	0.0903331	7.58905	4.25886	5.06835	1.51584	1.25491	2.22946
ENSMUST00000016638.7	ENSMUSG00000016494	Cd34	protein_coding	1.20032e-05	0.000664665	0.766014	0.174988	5.52752	0.190387	0.0264492	-0.00850728	0.0194819	0.0194819	1.98369	1.98248	2.29854	4.51634	5.15582	3.71052
ENSMUST00000120087.5	ENSMUSG00000047735	Samd9l	protein_coding	1.20011e-05	0.000664665	1.30545	0.298214	4.92449	0.617978	0.0142508	0.119146	0.029794	0.119146	0.31968	0.575541	0.50763	1.16219	2.68721	1.45212
ENSMUST00000001520.12	ENSMUSG00000031967	Afg3l1	protein_coding	1.19936e-05	0.000664665	0.327621	0.0748386	8.05834	0.0384386	0.000518037	0.00727931	0.00788319	0.00788319	17.3162	15.5761	17.9119	25.5388	21.8404	22.3167
ENSMUST00000022536.2	ENSMUSG00000021965	Ska3	protein_coding	1.20633e-05	0.000667213	0.465147	0.106284	6.16671	0.0743362	0.00283681	0.00894765	0.0141078	0.0141078	4.48584	6.14916	5.46272	8.41185	8.3111	8.32952
ENSMUST00000051521.4	ENSMUSG00000049593	Lce1h	protein_coding	1.21119e-05	0.000669113	-1.02243	0.233669	5.54135	0.379132	0.00424921	0.0776524	0.0192867	0.0776524	25.7672	16.2481	17.9824	6.64629	5.08479	9.78291
ENSMUST00000009340.9	ENSMUSG00000026536	Ifi211	protein_coding	1.21889e-05	0.000671015	1.24236	0.284022	5.51245	0.559843	0.00803942	0.112963	0.0197013	0.112963	1.88763	2.77483	3.28864	6.85441	14.0601	7.12124
ENSMUST00000070642.3	ENSMUSG00000056501	Cebpb	protein_coding	1.2185e-05	0.000671015	0.94322	0.21563	6.33487	0.322695	0.00239842	0.0673461	0.0131725	0.0673461	7.51726	8.71186	4.32243	19.518	16.528	14.6528
ENSMUST00000234235.1	ENSMUSG00000040888	Gfer	protein_coding	1.21849e-05	0.000671015	0.604601	0.138218	5.96602	0.11404	0.0133663	-0.00789478	0.01529	0.01529	16.8258	14.9516	13.1317	26.9789	25.5702	28.1385
ENSMUST00000074613.3	ENSMUSG00000060923	Acyp2	protein_coding	1.22938e-05	0.000675216	-0.679302	0.155365	5.00551	0.166652	0.00808672	0.0271834	0.0281205	0.0281205	11.4249	8.46892	10.3765	3.90135	5.82387	5.38879
ENSMUST00000015605.14	ENSMUSG00000015461	Atf6b	protein_coding	1.22937e-05	0.000675216	0.341554	0.0781175	7.8159	0.0407211	0.000930574	0.00622359	0.00822295	0.00822295	19.37	20.913	21.0052	31.7978	26.2598	27.6241
ENSMUST00000043148.12	ENSMUSG00000036402	Gng12	protein_coding	1.24739e-05	0.000684312	-0.431537	0.0987695	8.34428	0.0675739	0.000374765	0.0142584	0.00760993	0.0142584	38.181	41.7107	38.2236	20.7136	27.8327	27.8008
ENSMUST00000056710.9	ENSMUSG00000015750	Aph1a	protein_coding	1.25072e-05	0.000685344	0.40145	0.0918954	7.2831	0.0584823	0.0027948	0.00987234	0.00934617	0.00987234	21.8756	19.0108	24.0314	33.2957	29.1535	33.0823
ENSMUST00000009707.13	ENSMUSG00000009563	Tor2a	protein_coding	1.26541e-05	0.000692171	0.393589	0.0901486	6.81609	0.0503378	0.00146382	0.00336632	0.0107263	0.0107263	14.3388	12.6696	13.8806	21.3795	19.5175	18.8697
ENSMUST00000033930.4	ENSMUSG00000031530	Dusp4	protein_coding	1.26758e-05	0.000692171	-0.42945	0.0983706	7.87287	0.0669402	0.000352282	0.0141629	0.00813379	0.0141629	36.1955	33.61	27.0981	19.223	19.77	23.1617
ENSMUST00000144429.7	ENSMUSG00000031328	Flna	nonsense_mediated_decay	1.26713e-05	0.000692171	2.46989	0.565748	8.53982	2.21419	0.0337962	0.44631	0.00749834	0.44631	9.6379	4.22676	2.51045	121.078	45.0369	30.0707
ENSMUST00000135573.7	ENSMUSG00000028691	Prdx1	protein_coding	1.27583e-05	0.000694303	-0.489202	0.112094	9.26854	0.0868736	0.00016052	0.0186871	0.00760609	0.0186871	203.111	183.185	206.599	96.6157	131.445	132.466
ENSMUST00000048184.3	ENSMUSG00000041837	Pdcd7	protein_coding	1.27333e-05	0.000694303	0.498012	0.114102	6.09518	0.090028	0.00295159	0.0165772	0.0145099	0.0165772	4.72683	3.95433	3.29079	7.19942	5.95488	6.20116
ENSMUST00000105589.1	ENSMUSG00000019768	Esr1	protein_coding	1.27589e-05	0.000694303	-0.385799	0.0884008	7.40204	0.0540298	0.00111273	0.0106093	0.00905663	0.0106093	24.5616	20.8997	18.6551	13.4071	14.1468	15.3741
ENSMUST00000033006.13	ENSMUSG00000030750	Nsmce1	protein_coding	1.28218e-05	0.000696922	0.339096	0.0777187	7.63653	0.0399473	0.000517355	0.00629695	0.00854293	0.00854293	49.9344	44.7605	52.234	70.6242	63.2602	69.881
ENSMUST00000029881.9	ENSMUSG00000028226	Mmp16	protein_coding	1.32745e-05	0.000720699	-1.02591	0.235541	4.64523	0.361155	0.0460487	0.010713	0.0371707	0.0371707	1.28517	1.30645	0.845554	0.458028	0.449205	0.298037
ENSMUST00000041045.13	ENSMUSG00000037894	H2az1	protein_coding	1.33123e-05	0.000721921	0.316162	0.072599	9.21841	0.0318541	0.000334192	0.00199899	0.00757174	0.00757174	283.307	264.666	293.763	373.501	378.018	379.63
ENSMUST00000046045.12	ENSMUSG00000039103	Nexn	protein_coding	1.33656e-05	0.00072398	-0.800934	0.183952	5.56154	0.222099	0.0317457	0.00531657	0.0190119	0.0190119	6.40852	4.11266	5.36072	1.94569	2.57866	2.43588
ENSMUST00000033992.8	ENSMUSG00000031584	Gsr	protein_coding	1.35797e-05	0.000734737	0.376773	0.0866036	7.01759	0.0438816	0.00119225	0.000425489	0.010058	0.010058	9.82027	10.8063	10.3487	15.4421	14.5654	14.5731
ENSMUST00000046071.4	ENSMUSG00000042115	Klhdc8a	protein_coding	1.36183e-05	0.00073598	0.316264	0.0727056	8.32091	0.0348724	0.000301853	0.00578009	0.0076273	0.0076273	20.6697	21.1391	22.8084	31.9318	27.2231	28.6035
ENSMUST00000034377.7	ENSMUSG00000031903	Pla2g15	protein_coding	1.4135e-05	0.000762392	0.404515	0.0931686	7.04833	0.0585153	0.00305258	0.00872938	0.009968	0.009968	10.1978	8.46806	9.26101	15.7405	13.0627	12.7136
ENSMUST00000089188.8	ENSMUSG00000068122	Agtr2	protein_coding	1.41393e-05	0.000762392	2.02404	0.466188	3.35648	1.42709	0.11628	0.131303	0.209717	0.209717	0.0589484	0.10282	0.18774	1.05465	1.06025	0.484396
ENSMUST00000066983.12	ENSMUSG00000033157	Abhd10	protein_coding	1.41804e-05	0.000763736	0.577178	0.132958	5.43221	0.102712	0.00559428	-0.00212997	0.0209226	0.0209226	2.09778	2.11257	1.91359	3.5099	3.39417	3.82996
ENSMUST00000152208.7	ENSMUSG00000026418	Tnni1	protein_coding	1.42464e-05	0.000766418	-0.77139	0.177738	5.34322	0.216422	0.00969097	0.0376954	0.0222983	0.0376954	10.1292	7.06323	7.88275	2.81189	4.3524	4.33347
ENSMUST00000034205.4	ENSMUSG00000031756	Cenpn	protein_coding	1.42636e-05	0.000766472	0.449193	0.103506	6.31256	0.0609445	0.00277145	-0.00225623	0.0132989	0.0132989	7.85622	7.69433	7.5888	11.8628	12.3093	11.5581
ENSMUST00000212981.1	ENSMUSG00000031754	Nudt21	protein_coding	1.43859e-05	0.000772161	0.354413	0.0817017	7.52377	0.0395986	0.00123676	0.00115832	0.008776	0.008776	47.5309	43.5908	41.6561	61.4078	60.6792	64.1158
ENSMUST00000070215.7	ENSMUSG00000056209	Npm3	protein_coding	1.45311e-05	0.00077907	0.379563	0.0875441	8.18205	0.0524172	0.000553858	0.0109421	0.00774856	0.0109421	122.865	95.4115	116.287	170.765	154.943	155.42
ENSMUST00000026448.9	ENSMUSG00000025384	Faap100	protein_coding	1.45712e-05	0.000780335	0.48646	0.112215	6.16251	0.0758359	0.00475722	0.00129636	0.0141311	0.0141311	2.81346	2.70592	3.10816	4.76819	4.33147	4.77028
ENSMUST00000213634.1	ENSMUSG00000111521	Gm48529	lncRNA	1.46245e-05	0.000782303	-0.40593	0.093656	6.70702	0.0532747	0.00199496	0.00280625	0.0111622	0.0111622	13.3139	11.3844	12.9512	8.04323	8.28243	8.40284
ENSMUST00000049389.10	ENSMUSG00000039470	Zdhhc2	protein_coding	1.47455e-05	0.000787885	-0.646048	0.149118	6.07188	0.151897	0.00536594	0.0279884	0.0146443	0.0279884	6.59891	6.07993	5.38417	2.4679	3.03047	3.96258
ENSMUST00000044833.8	ENSMUSG00000032661	Oas3	protein_coding	1.4773e-05	0.00078846	2.25529	0.520607	3.33531	1.73976	0.190495	0.0768244	0.216053	0.216053	0.0357768	0.104245	0.0286428	0.524137	0.635006	0.318659
ENSMUST00000024270.13	ENSMUSG00000023505	Cdca3	protein_coding	1.48546e-05	0.000791919	0.551898	0.127434	7.10443	0.110865	0.00352263	0.0208367	0.00980991	0.0208367	11.589	12.1105	16.2587	25.2431	21.7597	20.8946
ENSMUST00000208742.1	ENSMUSG00000039361	Picalm	protein_coding	1.48921e-05	0.000793027	-0.936662	0.216305	8.30703	0.319347	0.00525107	0.0649309	0.00763803	0.0649309	61.1666	71.4953	62.2881	16.7574	26.9538	34.6267
ENSMUST00000084621.11	ENSMUSG00000039813	Tbc1d2	protein_coding	1.50459e-05	0.000800312	-0.35423	0.0818457	7.30934	0.044878	0.000766573	0.0082764	0.00928151	0.00928151	11.0404	10.2941	9.40749	7.52694	6.21408	7.6124
ENSMUST00000034299.5	ENSMUSG00000031838	Ifi30	lncRNA	1.50641e-05	0.000800381	-0.339439	0.0784331	7.65739	0.0401355	0.000725049	0.00623736	0.00850257	0.00850257	89.7105	72.3967	80.6941	57.2226	53.9471	58.4863
ENSMUST00000006123.10	ENSMUSG00000005968	Tuft1	protein_coding	1.52581e-05	0.000809775	-0.583109	0.134825	5.82279	0.123818	0.00994576	0.017321	0.0163136	0.017321	5.77152	4.07951	4.64724	2.34361	2.50104	3.0979
ENSMUST00000042055.9	ENSMUSG00000039515	Ptpa	protein_coding	1.53282e-05	0.000812582	0.310593	0.0718314	9.27124	0.0343504	0.000131571	0.00663088	0.00760806	0.00760806	97.2963	84.6524	97.398	125.763	117.623	133.227
ENSMUST00000114313.7	ENSMUSG00000026031	Cflar	protein_coding	1.5387e-05	0.000814789	-0.389499	0.0900977	7.13024	0.0552539	0.00132193	0.0108545	0.00973957	0.0108545	6.47771	7.99163	6.58443	4.15865	5.30804	4.61088
ENSMUST00000109764.7	ENSMUSG00000001911	Nfix	protein_coding	1.5472e-05	0.000817455	0.746761	0.172787	8.48522	0.203122	0.00029043	0.0444926	0.00752348	0.0444926	11.9142	18.7582	16.132	39.355	30.7815	27.4033
ENSMUST00000049089.6	ENSMUSG00000035799	Twist1	protein_coding	1.54629e-05	0.000817455	0.355344	0.0822177	7.26351	0.0450551	0.000744766	0.00822313	0.00939486	0.00939486	22.2344	22.0248	19.7221	34.3809	30.0472	26.6623
ENSMUST00000202990.3	ENSMUSG00000026879	Gsn	protein_coding	1.55741e-05	0.000821928	-0.351482	0.0813539	8.13352	0.042912	0.00212934	0.00518323	0.00779835	0.00779835	63.8736	55.0585	55.7462	40.7737	36.8727	43.7559
ENSMUST00000061721.5	ENSMUSG00000018983	E2f2	protein_coding	1.56348e-05	0.000824212	0.972395	0.225115	4.26396	0.324148	0.0211996	0.0294032	0.0548155	0.0548155	0.172635	0.238607	0.304261	0.682391	0.615312	0.547769
ENSMUST00000192915.1	ENSMUSG00000030768	Disp1	retained_intron	1.59748e-05	0.000839323	-1.23069	0.285225	4.21888	0.487429	0.0641615	-0.022847	0.0578682	0.0578682	2.4044	3.4286	3.80079	1.04251	0.84977	0.81687
ENSMUST00000198687.1	ENSMUSG00000106219	5830416I19Rik	lncRNA	1.59603e-05	0.000839323	-0.642716	0.148949	5.19969	0.150548	0.00535109	0.0279277	0.0246119	0.0279277	2.43624	3.31458	3.03728	1.87675	1.44625	1.24781
ENSMUST00000114900.7	ENSMUSG00000029826	Zc3hav1	protein_coding	1.59543e-05	0.000839323	1.12455	0.26061	6.62231	0.460888	0.00363522	0.0982412	0.0115477	0.0982412	1.57946	3.23036	3.2426	7.34646	9.71856	6.50546
ENSMUST00000070720.7	ENSMUSG00000029093	Sorcs2	protein_coding	1.60329e-05	0.000841442	1.04242	0.241636	4.19019	0.372257	0.0276103	0.0302245	0.0599714	0.0599714	0.624272	0.364705	0.590713	1.38335	1.27872	1.7152
ENSMUST00000165205.1	ENSMUSG00000090958	Lrrc32	protein_coding	1.61433e-05	0.000846297	0.637265	0.147772	8.22162	0.148036	0.000564408	0.0321905	0.00771083	0.0321905	14.3512	21.0597	19.2755	40.209	31.4924	29.9558
ENSMUST00000055647.14	ENSMUSG00000063077	Kif1b	protein_coding	1.63555e-05	0.000856469	-4.53681	1.05272	2.06488	6.72194	0.913627	-0.229678	0.748711	0.748711	0.234186	0.88847	0.19637	0	7.26833e-11	0.0074893
ENSMUST00000099623.9	ENSMUSG00000074968	Ano3	protein_coding	1.65458e-05	0.000865478	-0.671474	0.155902	5.79503	0.16443	0.0044083	0.0320497	0.0165406	0.0320497	1.97045	2.6943	2.16732	0.88228	1.39834	1.18005
ENSMUST00000086763.12	ENSMUSG00000004730	Adgre1	protein_coding	1.66635e-05	0.000870666	0.860759	0.199922	5.4321	0.265737	0.0390292	0.0153026	0.0209242	0.0209242	1.12319	1.51383	1.44118	3.35389	4.09005	2.2777
ENSMUST00000090973.11	ENSMUSG00000004891	Nes	protein_coding	1.67439e-05	0.000873904	-0.52787	0.122635	9.23119	0.101641	0.000112859	0.0224462	0.0075801	0.0224462	50.3206	63.7327	51.417	31.1243	27.3697	38.4068
ENSMUST00000110815.8	ENSMUSG00000016494	Cd34	protein_coding	1.677e-05	0.000874296	0.782455	0.181795	5.80864	0.22333	0.0231406	0.0264334	0.016428	0.0264334	1.88949	2.83198	3.42024	6.00419	5.7507	5.30497
ENSMUST00000164806.5	ENSMUSG00000022407	Adsl	protein_coding	1.70924e-05	0.000890125	0.365992	0.0851176	7.55325	0.048879	0.00185208	0.00901543	0.00871259	0.00901543	29.3164	27.4321	32.5708	39.3998	40.0271	47.223
ENSMUST00000029270.9	ENSMUSG00000027715	Ccna2	protein_coding	1.725e-05	0.000897343	0.401569	0.0934359	7.57427	0.0588536	0.0014632	0.0116322	0.00866848	0.0116322	15.5605	20.2059	16.6555	25.6985	28.3414	22.8061
ENSMUST00000237407.1	ENSMUSG00000003779	Kif20a	protein_coding	1.73424e-05	0.000901154	0.398738	0.0928028	7.74849	0.0525314	0.00458243	0.00145977	0.00833611	0.00833611	17.0068	14.3291	14.4736	23.3757	21.7224	21.9493
ENSMUST00000030518.15	ENSMUSG00000028745	Capzb	protein_coding	1.73825e-05	0.000902245	-1.00729	0.234466	6.2479	0.370361	0.0287677	0.053694	0.0136593	0.053694	13.1757	17.08	26.9171	6.08191	6.00405	7.78553
ENSMUST00000045607.11	ENSMUSG00000035683	Melk	protein_coding	1.7776e-05	0.000921661	0.414661	0.0966319	6.83617	0.0627884	0.0012944	0.0127122	0.0106525	0.0127122	6.69667	8.58856	9.0281	12.435	12.1093	11.3214
ENSMUST00000178632.7	ENSMUSG00000046432	Bex3	protein_coding	1.80343e-05	0.000934025	-0.793505	0.185055	5.29361	0.201055	0.0282873	-0.0130872	0.0230809	0.0230809	12.6512	9.71807	8.71803	4.68444	4.58553	4.42677
ENSMUST00000047721.9	ENSMUSG00000041506	Rrp9	protein_coding	1.80822e-05	0.000935482	0.310092	0.0723273	8.38094	0.0323137	0.000262421	0.00407082	0.00758444	0.00758444	61.9773	64.1456	59.5577	83.8916	76.5397	91.3088
ENSMUST00000095610.8	ENSMUSG00000021057	Akap5	protein_coding	1.82054e-05	0.000940823	-1.953	0.455687	3.35704	1.2747	0.101924	0.0611275	0.209553	0.209553	0.29123	0.289308	0.486768	0.0254297	0.0649564	0.0590179
ENSMUST00000020365.14	ENSMUSG00000020156	Pwwp3a	protein_coding	1.82609e-05	0.000942659	0.400093	0.0933672	6.79636	0.0512328	0.00227545	0.00173758	0.0108007	0.0108007	7.25931	6.87493	7.81737	11.165	10.6135	10.5654
ENSMUST00000114234.1	ENSMUSG00000026942	Traf2	protein_coding	1.84074e-05	0.000948154	0.409081	0.0955041	6.66883	0.057893	0.00235116	0.00726002	0.0113304	0.0113304	8.33047	7.15864	8.93991	12.2849	11.4379	12.44
ENSMUST00000077955.5	ENSMUSG00000063605	Ccdc102a	protein_coding	1.84013e-05	0.000948154	0.411423	0.0960494	7.63253	0.0618514	0.000529316	0.0133089	0.00855077	0.0133089	19.6223	19.6506	16.9499	33.107	25.1896	25.9443
ENSMUST00000029699.12	ENSMUSG00000028063	Lmna	protein_coding	1.86677e-05	0.000960511	0.434963	0.101621	9.93099	0.0691499	0.000176085	0.0153141	0.0084783	0.0153141	133.361	131.65	142.098	250.111	191.964	185.235
ENSMUST00000113026.1	ENSMUSG00000031438	Rnf128	protein_coding	1.92088e-05	0.000987279	-0.730608	0.170947	6.29765	0.195204	0.00239818	0.041436	0.0133827	0.041436	10.9534	11.2687	6.87195	3.99065	4.4138	5.15941
ENSMUST00000057792.8	ENSMUSG00000032667	Pon2	protein_coding	1.92492e-05	0.000988276	-0.441715	0.103363	6.31045	0.0596974	0.00271513	-0.00126041	0.0133108	0.0133108	8.68219	9.55402	8.95133	5.47217	5.93037	5.80152
ENSMUST00000050467.8	ENSMUSG00000048546	Tob2	protein_coding	1.94149e-05	0.000995704	0.349993	0.0819366	7.36989	0.0419329	0.000936227	0.00554413	0.00913418	0.00913418	7.89751	9.2065	8.57606	13.1241	11.7184	11.2216
ENSMUST00000228529.1	ENSMUSG00000021913	Ogdhl	protein_coding	1.9735e-05	0.00101102	-0.439913	0.103076	6.78304	0.0657954	0.00508494	0.00458791	0.0108519	0.0108519	8.02766	7.636	7.5361	5.45779	4.24266	5.13073
ENSMUST00000001080.15	ENSMUSG00000001053	N4bp3	protein_coding	1.98451e-05	0.00101556	0.852075	0.199707	4.49453	0.231757	0.0170886	0.000345808	0.0427357	0.0427357	0.647159	0.531756	0.674157	1.63941	1.30215	1.37391
ENSMUST00000077340.13	ENSMUSG00000041926	Rnpep	protein_coding	2.01616e-05	0.00103064	0.310739	0.0728904	8.52794	0.0328315	0.000466115	0.00436384	0.00750341	0.00750341	53.865	53.2523	47.7994	74.3028	63.5161	70.8067
ENSMUST00000152594.7	ENSMUSG00000040433	Zbtb38	protein_coding	2.06196e-05	0.00105292	-0.519475	0.121998	6.50825	0.0988166	0.00210935	0.0202158	0.0121454	0.0202158	3.04767	4.32891	3.19951	1.78943	2.24943	2.10638
ENSMUST00000021880.9	ENSMUSG00000044258	Ctla2a	protein_coding	2.07735e-05	0.00105848	-0.836818	0.196602	4.89784	0.250171	0.0275978	0.0225162	0.0303806	0.0303806	4.205	5.65484	5.97742	1.64506	2.56326	2.56071
ENSMUST00000031914.5	ENSMUSG00000029875	Ccdc184	protein_coding	2.07717e-05	0.00105848	-0.791328	0.185914	5.32891	0.229337	0.00803497	0.0438108	0.0225224	0.0438108	3.24919	2.17765	2.69777	1.53701	1.20735	0.930925
ENSMUST00000019266.5	ENSMUSG00000019122	Ccl9	protein_coding	2.10466e-05	0.00107124	0.669237	0.157338	5.04181	0.156722	0.00971555	0.0182324	0.0274175	0.0274175	1.07929	1.17139	1.47022	2.29683	2.85211	2.01138
ENSMUST00000050140.5	ENSMUSG00000045377	Tmem88	protein_coding	2.12375e-05	0.0010798	-0.487446	0.114654	6.12614	0.0870557	0.00146408	0.0182541	0.0143344	0.0182541	12.537	9.9897	9.08105	6.85924	5.48618	6.70314
ENSMUST00000026846.10	ENSMUSG00000025747	Tyms	protein_coding	2.14835e-05	0.00109113	0.393887	0.0927035	6.87612	0.0537803	0.00237997	0.0066654	0.0105109	0.0105109	7.52455	6.41554	8.1067	10.7073	10.7706	10.7266
ENSMUST00000030169.14	ENSMUSG00000028455	Stoml2	protein_coding	2.16964e-05	0.00110076	0.580244	0.136635	7.47999	0.123408	0.00218339	0.0258203	0.00887341	0.0258203	24.4317	21.7583	15.4324	39.2526	33.8441	33.9078
ENSMUST00000107038.5	ENSMUSG00000038170	Pde4dip	protein_coding	2.18332e-05	0.00110651	-0.827675	0.194964	4.81404	0.226826	0.0246532	0.00198677	0.0323634	0.0323634	1.8501	1.84303	1.72134	0.653268	0.707097	1.00142
ENSMUST00000042166.10	ENSMUSG00000038646	Ramac	protein_coding	2.19001e-05	0.00110871	-0.395378	0.093149	6.64985	0.0551526	0.00159772	0.0087215	0.0114174	0.0114174	24.569	25.8129	24.6697	13.9651	18.2208	17.9465
ENSMUST00000022816.14	ENSMUSG00000022205	Sub1	protein_coding	2.19581e-05	0.00111046	-0.440593	0.103816	6.2214	0.0633141	0.00236093	0.00398593	0.0138056	0.0138056	7.01181	6.46855	6.00971	3.8299	4.03012	4.44192
ENSMUST00000207875.1	ENSMUSG00000029461	Fam168a	protein_coding	2.23248e-05	0.00112779	-5.41626	1.27734	2.01498	8.95887	1.671	-1.47335	0.776388	0.776388	0.47604	1.57372	0.577672	0	0	0
ENSMUST00000108496.8	ENSMUSG00000001918	Slc1a5	protein_coding	2.2471e-05	0.00113397	0.709033	0.167272	6.75674	0.184394	0.00714282	0.0348269	0.0109558	0.0348269	4.52344	6.40894	6.89934	13.9433	11.6576	9.99604
ENSMUST00000201332.3	ENSMUSG00000029409	U90926	lncRNA	2.28165e-05	0.00115017	0.667281	0.157549	4.92986	0.163031	0.00755433	0.029261	0.0296783	0.0296783	6.38554	10.0391	9.20647	18.0105	15.1741	15.4024
ENSMUST00000034478.2	ENSMUSG00000031995	St14	protein_coding	2.29992e-05	0.00115815	-0.665771	0.157259	4.90903	0.145627	0.0069637	0.00885106	0.030132	0.030132	1.75194	1.39165	1.3637	0.673726	0.862463	0.746567
ENSMUST00000053713.4	ENSMUSG00000044030	Irf2bp1	protein_coding	2.31121e-05	0.0011626	0.402249	0.0950386	7.2162	0.0593802	0.000704805	0.0128437	0.00951422	0.0128437	11.1005	10.957	8.14219	15.6761	13.647	15.1709
ENSMUST00000049454.5	ENSMUSG00000040841	Six5	protein_coding	2.3191e-05	0.00116532	0.536359	0.126747	5.51689	0.0975244	0.00446139	0.00956362	0.0196359	0.0196359	1.80369	1.33597	1.54429	2.82743	2.48168	2.6022
ENSMUST00000030003.9	ENSMUSG00000028322	Exosc3	protein_coding	2.33731e-05	0.00117322	0.416069	0.0983624	6.47507	0.0533048	0.00217407	-0.000460635	0.0123387	0.0123387	17.2018	17.2399	15.5454	25.482	25.4347	23.7919
ENSMUST00000054351.5	ENSMUSG00000049001	Ndnf	protein_coding	2.34356e-05	0.00117511	1.32354	0.31294	4.56068	0.643044	0.0195521	0.127345	0.0401143	0.127345	0.0857179	0.223274	0.192887	0.660449	0.641313	0.451909
ENSMUST00000114768.9	ENSMUSG00000023092	Fhl1	protein_coding	2.35536e-05	0.00117978	-0.702092	0.166049	5.38565	0.180966	0.017246	0.0241122	0.0216388	0.0241122	8.76201	7.11917	5.83732	2.84173	3.39603	4.38546
ENSMUST00000028347.12	ENSMUSG00000026970	Rbms1	protein_coding	2.3908e-05	0.00119626	-0.346179	0.0819384	8.15596	0.0440087	0.000610091	0.00946077	0.00777485	0.00946077	27.8075	32.8788	30.443	18.9647	24.2618	20.5574
ENSMUST00000113682.8	ENSMUSG00000001285	Myg1	protein_coding	2.39694e-05	0.00119806	0.376538	0.0891363	7.24611	0.0486056	0.00247948	0.00510981	0.00943844	0.00943844	21.9059	21.7908	25.1616	34.2099	30.6151	34.1733
ENSMUST00000039991.13	ENSMUSG00000037344	Slc12a9	protein_coding	2.43396e-05	0.00121528	0.480046	0.113733	5.88962	0.0787686	0.00359388	0.00845013	0.0158087	0.0158087	1.87992	2.29573	2.06259	3.71874	2.94833	3.3523
ENSMUST00000046506.6	ENSMUSG00000040663	Clcf1	protein_coding	2.47375e-05	0.00123385	0.470643	0.111601	6.02084	0.0787102	0.00373501	0.0115885	0.0149472	0.0149472	5.24738	4.59458	4.62721	8.97815	7.61495	6.46458
ENSMUST00000042405.7	ENSMUSG00000046865	Fbl	protein_coding	2.4778e-05	0.00123456	0.382545	0.090719	8.98283	0.0537781	0.000212368	0.0121325	0.00746468	0.0121325	148.073	151.059	179.322	252.309	216.666	223.045
ENSMUST00000025023.14	ENSMUSG00000024188	Luc7l	protein_coding	2.49803e-05	0.00124333	0.419754	0.0995864	6.74405	0.0533051	0.00386896	-0.00331023	0.0110072	0.0110072	12.0682	12.787	12.7085	18.9416	19.0155	18.5081
ENSMUST00000181235.2	ENSMUSG00000097697	4833412C05Rik	lncRNA	2.51403e-05	0.00124866	-0.630307	0.149591	5.1145	0.138146	0.00748542	0.0162146	0.0260808	0.0260808	8.55866	6.25467	7.41418	4.13565	3.30146	4.16437
ENSMUST00000236361.1	ENSMUSG00000039615	Stub1	protein_coding	2.51182e-05	0.00124866	0.337161	0.0800148	8.01029	0.0377329	0.00166113	0.00287591	0.00794241	0.00794241	57.7897	52.8265	53.0696	81.283	69.0556	76.2741
ENSMUST00000032373.11	ENSMUSG00000030246	Ldhb	protein_coding	2.52821e-05	0.00125438	-0.332076	0.0788355	7.56055	0.0405404	0.000608228	0.00871432	0.00869716	0.00871432	60.2246	46.5419	52.12	37.2082	36.1283	38.1197
ENSMUST00000041416.7	ENSMUSG00000037440	Vnn1	protein_coding	2.55864e-05	0.00126815	-0.677202	0.160872	4.90615	0.13956	0.00862402	-0.00614961	0.0301957	0.0301957	2.58221	2.43262	2.32756	1.19553	1.29176	1.18043
ENSMUST00000080797.7	ENSMUSG00000061048	Cdh3	protein_coding	2.59153e-05	0.00128311	0.689034	0.163795	7.52476	0.174625	0.000632639	0.0396107	0.00877382	0.0396107	6.26992	9.44009	9.14968	18.7678	16.2227	13.6056
ENSMUST00000039725.11	ENSMUSG00000039748	Exo1	protein_coding	2.59836e-05	0.00128514	0.494114	0.117476	5.76489	0.0771569	0.00390087	0.000989643	0.0168	0.0168	0.894289	0.902178	0.993915	1.47373	1.6367	1.40849
ENSMUST00000206893.1	ENSMUSG00000030811	Fbxl19	protein_coding	2.61104e-05	0.00129006	0.530307	0.126114	6.06995	0.103453	0.00811311	0.015744	0.0146555	0.015744	2.42635	2.07088	2.7119	4.57417	3.42967	4.17878
ENSMUST00000202179.1	ENSMUSG00000042331	Specc1	protein_coding	2.62119e-05	0.00129373	-0.605302	0.143979	8.12076	0.134793	0.00270576	0.0283891	0.00781208	0.0283891	14.4528	20.3478	20.2206	8.26199	10.1272	11.1643
ENSMUST00000001920.12	ENSMUSG00000001864	Aif1l	protein_coding	2.63907e-05	0.00130119	-0.532961	0.126818	8.04506	0.104514	0.000435626	0.0236886	0.00789916	0.0236886	45.1278	32.8821	33.3249	20.5519	19.1231	24.4616
ENSMUST00000025181.17	ENSMUSG00000061232	H2-K1	protein_coding	2.64668e-05	0.00130358	1.56345	0.372082	5.96694	0.794106	0.192383	-0.116398	0.0152842	0.0152842	2.29939	3.57916	3.60921	17.7838	16.7311	10.4608
ENSMUST00000239374.1	ENSMUSG00000074813	Morrbid	lncRNA	2.6731e-05	0.00131522	-1.74393	0.415255	4.21036	0.975453	0.200177	-0.121346	0.0584773	0.0584773	8.55943	9.33828	7.42717	1.58557	0.923911	1.96152
ENSMUST00000106998.7	ENSMUSG00000001829	Clpb	protein_coding	2.69006e-05	0.00132091	0.341298	0.0812956	7.45611	0.038314	0.000985223	0.00322562	0.00892824	0.00892824	17.3443	17.2228	18.1278	26.2832	22.5729	24.4592
ENSMUST00000022145.14	ENSMUSG00000021643	Serf1	protein_coding	2.69025e-05	0.00132091	-0.478669	0.114017	5.84189	0.0788985	0.00333617	0.00936562	0.0161637	0.0161637	29.4483	29.3569	33.7642	16.6429	20.9249	18.847
ENSMUST00000003612.12	ENSMUSG00000003518	Dusp3	protein_coding	2.70807e-05	0.00132828	-0.312255	0.0744046	8.19385	0.0301767	0.00056701	0.00059008	0.00773705	0.00773705	28.064	28.8469	28.4768	19.9703	20.1157	21.5472
ENSMUST00000013299.10	ENSMUSG00000013155	Enkd1	protein_coding	2.75312e-05	0.00134897	0.487462	0.116257	5.92591	0.0787394	0.00471785	0.00459926	0.0155556	0.0155556	6.47774	6.13893	6.92956	11.4732	9.40454	10.6216
ENSMUST00000176778.7	ENSMUSG00000029705	Cux1	protein_coding	2.76122e-05	0.00135154	-0.836158	0.19945	4.70794	0.222635	0.0244332	-0.00832419	0.0352374	0.0352374	0.77976	0.826515	0.693717	0.282635	0.314091	0.390836
ENSMUST00000165033.1	ENSMUSG00000038418	Egr1	protein_coding	2.76748e-05	0.00135199	0.881846	0.210374	7.85508	0.286404	0.000865023	0.0655208	0.00816101	0.0655208	10.2417	17.6065	19.26	37.4042	39.2484	32.4438
ENSMUST00000089520.2	ENSMUSG00000068270	Shroom4	protein_coding	2.76787e-05	0.00135199	-0.536789	0.128058	6.7398	0.106121	0.00135796	0.0232403	0.0110246	0.0232403	3.08086	4.76736	3.79206	2.0073	2.29915	2.3188
ENSMUST00000071858.4	ENSMUSG00000071379	Hpcal1	protein_coding	2.78464e-05	0.00135878	-0.321277	0.0766699	7.73216	0.0338137	0.0004526	0.00310738	0.00836481	0.00836481	54.9205	49.5431	49.4972	37.4	34.3965	38.451
ENSMUST00000102553.10	ENSMUSG00000003038	Hmgn2	protein_coding	2.79127e-05	0.00136061	0.407158	0.097177	8.85132	0.0610653	0.000252587	0.0139125	0.007443	0.0139125	139.94	144.572	170.67	234.476	245.816	196.975
ENSMUST00000043214.7	ENSMUSG00000033220	Rac2	protein_coding	2.79963e-05	0.00136328	1.0395	0.248139	4.49223	0.398055	0.0150265	0.077333	0.0428326	0.077333	0.353268	0.427417	0.722521	1.46485	1.54278	1.07201
ENSMUST00000116412.7	ENSMUSG00000049482	Ctu2	protein_coding	2.82001e-05	0.00137179	0.363202	0.086734	7.20782	0.0435616	0.00174853	0.00323509	0.00953566	0.00953566	9.57504	9.03782	8.54906	13.5876	11.6337	13.548
ENSMUST00000026891.4	ENSMUSG00000025785	Exosc7	protein_coding	2.82539e-05	0.00137287	0.436742	0.104306	6.1879	0.0635692	0.00232925	0.00560352	0.0139905	0.0139905	12.1451	10.2698	12.5692	18.208	17.2852	17.7165
ENSMUST00000025642.13	ENSMUSG00000024735	Prpf19	protein_coding	2.82805e-05	0.00137287	0.298389	0.0712675	9.03669	0.0300636	0.00013722	0.00405374	0.00748137	0.00748137	99.0445	88.1829	97.2318	130.366	119.231	128.856
ENSMUST00000006625.7	ENSMUSG00000006456	Rbm14	protein_coding	2.85217e-05	0.00138316	0.312233	0.0746084	8.05131	0.0323536	0.000458012	0.00342541	0.00789161	0.00789161	21.3032	23.1852	23.8499	31.9246	29.1857	31.1252
ENSMUST00000055006.11	ENSMUSG00000047821	Trim16	protein_coding	2.8622e-05	0.00138659	-0.484837	0.115874	7.36603	0.0866324	0.00407536	0.016065	0.0091435	0.016065	12.7298	17.4773	14.6904	10.0775	9.32774	7.78663
ENSMUST00000057561.8	ENSMUSG00000031563	Wwc2	protein_coding	2.90007e-05	0.0014035	-0.36373	0.0869924	8.40723	0.0487712	0.000248187	0.0111033	0.00756746	0.0111033	15.0982	19.7606	17.3007	12.738	12.0264	10.8469
ENSMUST00000080178.12	ENSMUSG00000011257	Pabpc4	protein_coding	2.9162e-05	0.00140987	0.307465	0.0735578	9.10593	0.0301807	0.000606577	0.00166864	0.00750956	0.00750956	74.5456	70.2653	64.9234	96.6547	91.7968	93.2967
ENSMUST00000021114.4	ENSMUSG00000020766	Galk1	protein_coding	2.92644e-05	0.00141337	0.351083	0.0840089	8.69994	0.0454467	0.000202877	0.0103834	0.0074512	0.0103834	102.595	87.2697	99.8812	129.69	125.172	151.66
ENSMUST00000229877.1	ENSMUSG00000055065	Ddx17	protein_coding	2.94111e-05	0.0014182	0.327706	0.0784364	8.76949	0.0353891	0.00178536	0.00217943	0.00744304	0.00744304	30.2544	34.966	33.9669	47.4725	43.9457	44.3489
ENSMUST00000231589.1	ENSMUSG00000022836	Mylk	protein_coding	2.94244e-05	0.0014182	-0.394334	0.0943862	6.68008	0.0569951	0.00208317	0.0108485	0.01128	0.01128	18.2733	17.0848	18.9661	11.3554	14.3246	10.787
ENSMUST00000102762.9	ENSMUSG00000034853	Acot11	protein_coding	2.94963e-05	0.00142021	-0.707243	0.169305	5.40326	0.184455	0.00873838	0.0342581	0.0213672	0.0342581	1.26407	1.37076	1.70539	0.881795	0.706972	0.546244
ENSMUST00000033519.2	ENSMUSG00000031176	Dynlt3	protein_coding	2.95921e-05	0.00142338	-0.907135	0.217195	7.11552	0.303477	0.00100601	0.0697548	0.00977952	0.0697548	33.0595	31.9413	32.6238	8.34523	15.38	16.6929
ENSMUST00000080995.7	ENSMUSG00000060044	Tmem26	protein_coding	2.98006e-05	0.00143194	1.76403	0.422524	3.73664	1.14777	0.120672	0.147117	0.117626	0.147117	0.0504683	0.167027	0.126068	0.954185	0.549686	0.419905
ENSMUST00000066994.6	ENSMUSG00000034522	Zfp395	protein_coding	2.99038e-05	0.00143544	0.753791	0.180584	5.94313	0.209593	0.00269445	0.0462212	0.0154399	0.0462212	1.24319	1.89685	1.79773	3.8676	3.80089	2.68518
ENSMUST00000043150.5	ENSMUSG00000024981	Acsl5	protein_coding	3.02534e-05	0.00145075	0.320016	0.076714	7.71519	0.0321051	0.000432417	0.00129502	0.00839514	0.00839514	13.1673	12.8828	13.7071	18.727	17.5564	17.6891
ENSMUST00000089645.12	ENSMUSG00000068329	Htra2	protein_coding	3.04395e-05	0.00145819	0.402283	0.0964672	7.46055	0.0597166	0.00279662	0.0111622	0.00891794	0.0111622	26.2666	20.0655	22.7471	31.6271	32.3911	37.6655
ENSMUST00000199470.4	ENSMUSG00000039103	Nexn	protein_coding	3.05655e-05	0.00146221	-0.657883	0.157796	5.43908	0.151039	0.0165317	0.00996325	0.0208175	0.0208175	4.08309	6.07734	4.11682	2.173	2.44036	2.56027
ENSMUST00000046332.5	ENSMUSG00000036896	C1qc	protein_coding	3.05852e-05	0.00146221	0.802546	0.1925	6.22465	0.237692	0.00321993	0.0523646	0.0137877	0.0523646	6.02696	7.60452	10.0701	18.266	19.707	13.8145
ENSMUST00000097649.9	ENSMUSG00000026305	Lrrfip1	protein_coding	3.09199e-05	0.00147374	-0.433655	0.104079	8.27556	0.069416	0.000890328	0.0153584	0.00766348	0.0153584	35.1321	44.1855	39.1922	21.1926	27.1495	27.5881
ENSMUST00000222310.1	ENSMUSG00000084883	Ccdc85c	protein_coding	3.08982e-05	0.00147374	0.523721	0.125691	5.56217	0.0888931	0.00469369	0.00356638	0.0190035	0.0190035	1.17614	1.21676	1.09444	2.23545	1.86492	1.76676
ENSMUST00000160013.7	ENSMUSG00000043004	Gng2	protein_coding	3.09063e-05	0.00147374	-0.460631	0.110551	6.15315	0.077546	0.00414909	0.0132156	0.0141832	0.0141832	4.75882	4.61915	5.24237	2.49221	3.21781	3.45531
ENSMUST00000074552.11	ENSMUSG00000008690	Ncaph2	protein_coding	3.09667e-05	0.00147448	0.4087	0.098098	8.44136	0.0616585	0.00242063	0.0120142	0.00754704	0.0120142	28.2138	27.8649	34.5458	44.2884	40.5335	49.1638
ENSMUST00000023509.4	ENSMUSG00000062901	Klhl24	protein_coding	3.15927e-05	0.00150277	-0.465856	0.11194	5.9409	0.0679898	0.00334098	0.000263183	0.0154547	0.0154547	1.86414	2.03089	1.75122	1.09533	1.23582	1.15363
ENSMUST00000033776.14	ENSMUSG00000031403	Dkc1	protein_coding	3.17293e-05	0.00150775	0.42976	0.103291	7.52191	0.0682109	0.00137829	0.0146252	0.00878005	0.0146252	16.5101	16.494	19.3293	22.2081	29.0851	28.375
ENSMUST00000042986.9	ENSMUSG00000038349	Plcl1	protein_coding	3.19581e-05	0.00151709	-0.542012	0.130321	5.67982	0.108513	0.00495119	0.0205242	0.0176169	0.0205242	1.44416	2.0993	1.92471	0.93969	1.20776	0.970365
ENSMUST00000033941.6	ENSMUSG00000031538	Plat	protein_coding	3.19959e-05	0.00151736	0.641999	0.154372	7.18003	0.152246	0.00118973	0.0345565	0.00960753	0.0345565	7.94236	11.5264	12.3902	21.7339	20.1672	17.1702
ENSMUST00000211606.1	ENSMUSG00000038482	Tfdp1	retained_intron	3.21245e-05	0.00152194	0.781768	0.188022	5.7823	0.225771	0.0198044	0.0332239	0.0166485	0.0332239	3.06029	2.68318	1.67162	4.76914	5.13898	5.65369
ENSMUST00000032168.6	ENSMUSG00000030082	Sec61a1	protein_coding	3.24622e-05	0.00153639	0.346474	0.0833778	9.46288	0.0443554	0.000133493	0.0102943	0.00777915	0.0102943	87.6802	95.6714	99.0951	150.818	126.402	118.884
ENSMUST00000060455.14	ENSMUSG00000023572	Ccndbp1	protein_coding	3.26111e-05	0.00154189	-0.4039	0.0972218	6.49538	0.0490455	0.00195889	-0.00182787	0.0122192	0.0122192	16.2784	16.329	15.9037	10.4485	10.6733	10.7944
ENSMUST00000043848.10	ENSMUSG00000038252	Ncapd2	protein_coding	3.31481e-05	0.00156572	0.558223	0.134489	8.56092	0.115189	0.000269027	0.0268621	0.00748986	0.0268621	19.0209	23.5219	26.4624	46.5349	36.8768	35.3317
ENSMUST00000070524.4	ENSMUSG00000056429	Tgoln1	protein_coding	3.37162e-05	0.00159096	-0.340059	0.0820052	7.5697	0.0427618	0.000685181	0.0094021	0.00867799	0.0094021	13.496	15.5652	13.0634	8.6881	11.1128	9.76818
ENSMUST00000051594.11	ENSMUSG00000021697	Depdc1b	protein_coding	3.37503e-05	0.00159098	0.674832	0.162745	4.89658	0.142492	0.00932005	-0.0019789	0.0304088	0.0304088	0.930426	1.17312	1.11139	2.18783	2.02555	2.0162
ENSMUST00000110352.9	ENSMUSG00000021134	Srsf5	protein_coding	3.3916e-05	0.0015972	-0.622439	0.15015	6.28728	0.137364	0.020377	0.0060409	0.0134407	0.0134407	14.7475	16.4302	19.8867	9.31425	10.2505	7.41151
ENSMUST00000035565.4	ENSMUSG00000032855	Pkd1	protein_coding	3.39766e-05	0.00159846	-0.326991	0.0788874	7.76826	0.0386739	0.00103277	0.00721348	0.00830206	0.00830206	4.55202	5.74021	4.46987	3.47825	3.59995	3.37724
ENSMUST00000070531.7	ENSMUSG00000056423	Uts2b	protein_coding	3.4111e-05	0.00160318	-1.74909	0.422065	3.52122	1.13156	0.0313704	0.235838	0.164588	0.235838	6.69041	2.73887	3.85298	0.392164	0.626552	1.26898
ENSMUST00000137596.7	ENSMUSG00000027993	Trim2	retained_intron	3.45002e-05	0.00161452	-0.527418	0.127349	6.37952	0.102912	0.00196933	0.0223572	0.0129148	0.0223572	5.32097	5.56338	5.75428	4.02417	3.19738	2.61489
ENSMUST00000065793.11	ENSMUSG00000053398	Phgdh	protein_coding	3.44958e-05	0.00161452	0.342111	0.0826045	10.1388	0.0433002	4.8469e-05	0.0101868	0.00893316	0.0101868	293.855	269.164	329.405	425.716	382.172	435.115
ENSMUST00000089022.8	ENSMUSG00000060477	Irak2	protein_coding	3.44558e-05	0.00161452	-0.513786	0.124048	6.75738	0.0976584	0.0115714	0.0115106	0.0109532	0.0115106	12.2231	9.6234	9.39948	5.03125	6.79004	6.60417
ENSMUST00000092688.11	ENSMUSG00000017176	Nt5c3b	protein_coding	3.44927e-05	0.00161452	0.341475	0.0824506	7.50229	0.0395041	0.00137385	0.00427922	0.0088233	0.0088233	30.6208	30.3218	34.7787	43.3704	43.1232	46.776
ENSMUST00000164957.7	ENSMUSG00000023048	Prr13	protein_coding	3.45232e-05	0.00161452	-0.370428	0.0894456	7.24796	0.0439685	0.00256698	0.000937372	0.0094338	0.0094338	50.6274	46.3475	51.0362	33.8094	32.4907	34.7058
ENSMUST00000029846.4	ENSMUSG00000028195	Ccn1	protein_coding	3.46099e-05	0.00161698	0.326716	0.0789016	10.2824	0.0360087	3.14276e-05	0.00495076	0.00930677	0.00930677	358.945	383.043	332.21	531.792	489.616	450.082
ENSMUST00000068952.9	ENSMUSG00000028173	Wls	protein_coding	3.52391e-05	0.0016415	-0.446534	0.107945	7.69037	0.0738004	0.00239644	0.0150819	0.0084405	0.0150819	24.2373	29.7664	23.4945	13.6082	17.6908	17.6563
ENSMUST00000079866.10	ENSMUSG00000018379	Srsf1	protein_coding	3.52003e-05	0.0016415	0.304207	0.0735348	8.49873	0.0342515	0.000386777	0.00772428	0.00751683	0.00772428	47.0757	50.9784	45.8108	55.5668	69.5067	68.1724
ENSMUST00000115262.7	ENSMUSG00000075705	Msrb1	protein_coding	3.5212e-05	0.0016415	-0.327604	0.0791919	7.54427	0.0366411	0.000675313	0.00487938	0.00873172	0.00873172	89.9147	73.6399	79.8129	59.6883	56.2925	56.1355
ENSMUST00000025752.14	ENSMUSG00000024833	Pola2	protein_coding	3.60893e-05	0.00167945	0.457702	0.110792	6.67851	0.0775771	0.00282307	0.0155892	0.011287	0.0155892	7.357	6.48529	7.5749	13.4127	10.0104	10.2609
ENSMUST00000064848.6	ENSMUSG00000052798	Nup107	protein_coding	3.6132e-05	0.00167978	0.329574	0.0797823	7.6966	0.0382341	0.00111883	0.00594169	0.00842901	0.00842901	16.1576	17.3292	19.7649	23.0674	24.7164	25.0255
ENSMUST00000022693.8	ENSMUSG00000022098	Bmp1	protein_coding	3.62613e-05	0.00168414	-0.311645	0.0754572	8.24205	0.0318832	0.000848337	0.00258459	0.00769234	0.00769234	29.7397	32.2386	29.3412	23.9324	20.9099	21.4133
ENSMUST00000002080.11	ENSMUSG00000002006	Pdzd4	protein_coding	3.6345e-05	0.00168637	0.720183	0.174397	6.15766	0.192096	0.00846389	0.0371575	0.014158	0.0371575	1.84957	1.97873	2.59919	5.22244	4.60145	3.35404
ENSMUST00000055984.6	ENSMUSG00000048039	Isg20l2	protein_coding	3.6389e-05	0.00168675	0.344056	0.0833209	7.16692	0.0376836	0.000771675	0.00194242	0.00964188	0.00964188	10.4434	11.8738	11.0529	16.166	15.5596	14.7627
ENSMUST00000162792.7	ENSMUSG00000033400	Agl	protein_coding	3.65435e-05	0.00169225	-0.381814	0.0924867	6.93848	0.0528258	0.00252799	0.00883598	0.0103027	0.0103027	4.63709	6.02587	5.56697	3.28802	3.81475	3.77042
ENSMUST00000114482.2	ENSMUSG00000026981	Il1rn	protein_coding	3.66285e-05	0.00169452	1.25196	0.3033	5.1378	0.580608	0.0410251	0.0969616	0.0256697	0.0969616	0.849309	2.07429	1.81543	6.22155	5.32319	4.03323
ENSMUST00000084947.9	ENSMUSG00000060950	Trmt61a	protein_coding	3.67977e-05	0.00170069	0.37372	0.090561	6.88502	0.0456781	0.00182165	0.00290114	0.0104803	0.0104803	8.56045	8.21578	8.6846	13.468	11.7847	11.5174
ENSMUST00000025089.8	ENSMUSG00000024242	Map4k3	protein_coding	3.68859e-05	0.0017031	-0.546676	0.13249	6.52019	0.110721	0.012582	0.0137484	0.0120781	0.0137484	6.0983	7.4525	6.50127	2.99631	4.55228	4.02879
ENSMUST00000112939.9	ENSMUSG00000000568	Hnrnpd	protein_coding	3.70434e-05	0.0017087	0.340167	0.082461	7.68263	0.0371175	0.00174487	0.00125932	0.00845487	0.00845487	33.7151	37.4218	36.8746	51.7227	51.3435	47.069
ENSMUST00000086084.1	ENSMUSG00000066755	Tnfsf18	protein_coding	3.72244e-05	0.00171538	-1.3242	0.32109	3.71433	0.559191	0.0327984	0.00862827	0.12185	0.12185	1.55327	1.18808	1.3252	0.287456	0.466902	0.309922
ENSMUST00000057921.9	ENSMUSG00000062421	Arf2	protein_coding	3.75351e-05	0.001728	-0.355071	0.0861373	7.16463	0.0467262	0.00100569	0.0101238	0.0096479	0.0101238	22.3194	20.08	19.8691	12.2567	15.7047	15.1628
ENSMUST00000054083.12	ENSMUSG00000046324	Ermp1	nonsense_mediated_decay	3.76896e-05	0.00173343	0.48294	0.117184	6.05668	0.081904	0.005865	0.00905339	0.0147332	0.0147332	1.78644	2.50638	2.22231	3.39044	3.68022	3.26323
ENSMUST00000028972.8	ENSMUSG00000027472	Pdrg1	protein_coding	3.80048e-05	0.00174622	-0.356649	0.0865804	8.29035	0.047155	0.000370134	0.0108741	0.00765133	0.0108741	133.102	101.58	119.433	85.4259	79.0199	78.3309
ENSMUST00000112871.7	ENSMUSG00000061353	Cxcl12	protein_coding	3.82723e-05	0.00175681	-0.407119	0.0988712	7.85344	0.0614543	0.000565684	0.0140976	0.00816355	0.0140976	29.1759	35.0443	24.7083	20.3436	18.2273	19.2706
ENSMUST00000107669.8	ENSMUSG00000040046	Tph1	protein_coding	3.87155e-05	0.00177542	-1.93157	0.469396	5.1895	1.38369	0.0192889	0.31121	0.024783	0.31121	8.964	7.80823	7.60319	0.450309	2.0873	1.59674
ENSMUST00000100484.5	ENSMUSG00000016554	Eif3d	protein_coding	3.91219e-05	0.00179232	0.310151	0.0754148	9.53841	0.035683	6.74503e-05	0.00846364	0.00786407	0.00846364	170.842	170.538	191.181	264.166	218.318	235.321
ENSMUST00000021941.7	ENSMUSG00000021485	Mxd3	protein_coding	3.9446e-05	0.00180542	0.602881	0.146661	5.8494	0.134851	0.00463657	0.0276278	0.0161061	0.0276278	6.14968	4.39293	6.32147	11.6746	9.38717	9.12616
ENSMUST00000146520.4	ENSMUSG00000025747	Tyms	nonsense_mediated_decay	3.95438e-05	0.00180814	0.420903	0.102406	6.42524	0.0616638	0.00308788	0.00755723	0.0126427	0.0126427	31.5756	26.8206	33.9129	44.5251	45.1512	47.7625
ENSMUST00000200645.4	ENSMUSG00000029472	Anapc5	protein_coding	3.97677e-05	0.00181662	0.306768	0.0746609	8.83253	0.0333819	0.000919277	0.00551799	0.00744209	0.00744209	69.8196	68.3124	75.6967	105.505	90.1813	90.9735
ENSMUST00000081702.11	ENSMUSG00000015363	Trabd	protein_coding	3.98789e-05	0.00181937	0.373429	0.090899	7.44404	0.0492773	0.00343755	0.00586549	0.00895639	0.00895639	14.2966	15.987	15.7542	24.0101	19.3963	22.8908
ENSMUST00000023453.9	ENSMUSG00000022769	Sdf2l1	protein_coding	3.99048e-05	0.00181937	0.360976	0.0878709	6.88678	0.0408721	0.00110767	0.00111843	0.0104743	0.0104743	22.3252	21.7882	21.1083	33.2315	29.4089	30.1791
ENSMUST00000102476.4	ENSMUSG00000060802	B2m	protein_coding	4.07812e-05	0.00185753	0.292401	0.071265	8.94814	0.0314446	0.000161702	0.00708219	0.00745634	0.00745634	311.053	337.503	340.221	434.681	485.07	383.741
ENSMUST00000029131.10	ENSMUSG00000027603	Ggt7	protein_coding	4.10198e-05	0.00186488	0.544666	0.132792	5.50516	0.102707	0.00664041	0.010495	0.01981	0.01981	1.55822	2.01687	1.91761	3.45619	3.15217	2.74136
ENSMUST00000051356.11	ENSMUSG00000004056	Akt2	protein_coding	4.10809e-05	0.00186488	0.330797	0.0806562	8.3178	0.0375345	0.00212846	0.00375481	0.00762967	0.00762967	31.4846	30.2758	32.4602	46.907	39.3421	43.8988
ENSMUST00000021158.3	ENSMUSG00000020803	Txndc17	protein_coding	4.11005e-05	0.00186488	-0.38039	0.0927509	7.99202	0.0537323	0.000405603	0.0124985	0.00796596	0.0124985	153.441	129.692	141.192	81.7014	98.4822	105.511
ENSMUST00000023672.9	ENSMUSG00000022951	Rcan1	protein_coding	4.10756e-05	0.00186488	0.514722	0.125501	7.13172	0.098382	0.00558315	0.0180425	0.0097356	0.0180425	11.6268	10.7456	14.6608	22.4563	17.7607	21.0078
ENSMUST00000017961.10	ENSMUSG00000017817	Jph2	protein_coding	4.16607e-05	0.0018876	-0.467265	0.114021	8.52143	0.0811019	0.000659816	0.0188413	0.00750629	0.0188413	44.0573	38.4207	29.1285	22.7189	21.5973	24.0732
ENSMUST00000033871.7	ENSMUSG00000031482	Slc25a15	protein_coding	4.16811e-05	0.0018876	0.430769	0.105118	6.08738	0.0570026	0.00201998	-0.000352415	0.0145547	0.0145547	3.01365	3.23707	3.13138	4.86015	4.92875	4.46067
ENSMUST00000066134.5	ENSMUSG00000053604	Rpia	protein_coding	4.26791e-05	0.00192789	0.507211	0.123937	5.7297	0.0915175	0.00591891	0.0120044	0.0171218	0.0171218	3.93906	3.7115	4.17702	7.77682	6.3276	5.49534
ENSMUST00000047404.6	ENSMUSG00000032435	Dync1li1	protein_coding	4.27028e-05	0.00192789	-0.304323	0.074364	8.04476	0.029304	0.000395486	0.00150476	0.00789953	0.00789953	44.7357	44.6236	40.1992	29.833	32.0002	32.2973
ENSMUST00000043315.14	ENSMUSG00000041481	Serpina3g	protein_coding	4.2686e-05	0.00192789	0.926546	0.226404	6.56288	0.319057	0.00352774	0.0733607	0.0118468	0.0733607	4.93642	6.48271	9.87069	19.0247	17.7973	14.1915
ENSMUST00000063814.14	ENSMUSG00000052102	Gnpda1	protein_coding	4.2734e-05	0.00192789	-0.368973	0.0901654	6.89282	0.049603	0.001741	0.00920979	0.0104537	0.0104537	14.99	15.1448	14.4227	11.9985	9.53349	9.13728
ENSMUST00000162098.8	ENSMUSG00000027833	Shox2	protein_coding	4.28576e-05	0.00193162	0.684058	0.16719	5.53258	0.150139	0.0225189	-0.0103215	0.0194097	0.0194097	1.84711	2.11762	2.3784	3.77898	4.52138	4.14379
ENSMUST00000016463.3	ENSMUSG00000016319	Slc25a5	protein_coding	4.29829e-05	0.00193542	0.302746	0.074006	9.74792	0.0306013	6.09528e-05	0.00381995	0.00815437	0.00815437	409.286	361.182	403.05	521.162	509.786	535.374
ENSMUST00000209124.1	ENSMUSG00000109324	Prmt1	protein_coding	4.33225e-05	0.00194885	0.32141	0.0786033	8.22117	0.0368951	0.00155648	0.00582336	0.00771125	0.00771125	145.372	126.799	145.196	197.903	173.642	195.561
ENSMUST00000030709.8	ENSMUSG00000028885	Smpdl3b	protein_coding	4.35871e-05	0.00195877	0.588861	0.14406	5.20271	0.108423	0.00656878	-0.00107398	0.0245613	0.0245613	1.77373	1.90949	1.9436	3.67189	3.22008	3.15898
ENSMUST00000033010.8	ENSMUSG00000030752	Kdm8	protein_coding	4.36531e-05	0.00195877	0.485505	0.118785	5.74023	0.0803355	0.00414168	0.00788463	0.0170233	0.0170233	2.36339	2.90485	3.07975	4.69683	4.31697	4.34267
ENSMUST00000079063.6	ENSMUSG00000063632	Sox11	protein_coding	4.36673e-05	0.00195877	-0.432543	0.105829	7.32778	0.0695678	0.000762705	0.0160371	0.00923641	0.0160371	7.42199	7.86359	5.46892	4.22911	4.46534	4.45503
ENSMUST00000173075.2	ENSMUSG00000061232	H2-K1	protein_coding	4.37358e-05	0.00195998	4.3054	1.05349	1.70328	5.70253	0.703317	-0.526327	0.961438	0.961438	0	0	0.018265	2.35107	1.78424	1.0142
ENSMUST00000037248.9	ENSMUSG00000042606	Hirip3	protein_coding	4.41427e-05	0.00197634	0.490913	0.120185	5.87252	0.0865332	0.00573377	0.0120594	0.0159328	0.0159328	2.60336	2.66546	2.95912	5.23173	4.43736	3.73388
ENSMUST00000032865.16	ENSMUSG00000030630	Fah	protein_coding	4.4227e-05	0.00197824	-0.354933	0.0869036	6.96569	0.0451373	0.00111208	0.00806809	0.0102163	0.0102163	23.4453	21.7852	24.1179	17.6085	14.0921	16.2729
ENSMUST00000023221.12	ENSMUSG00000022561	Gpaa1	protein_coding	4.45883e-05	0.00199251	0.484563	0.118698	7.46347	0.0873475	0.00230362	0.0188302	0.00891122	0.0188302	19.1934	18.7179	12.928	28.4233	25.8174	26.3949
ENSMUST00000028251.9	ENSMUSG00000026889	Rbm18	protein_coding	4.49326e-05	0.002006	-0.351746	0.0862011	6.89404	0.0445857	0.000696384	0.0086386	0.0104496	0.0104496	15.551	14.3122	14.5109	8.82994	10.8306	11.2165
ENSMUST00000135469.7	ENSMUSG00000004085	Map3k20	protein_coding	4.50132e-05	0.0020077	-0.482441	0.118242	7.71939	0.0866021	0.000483628	0.0204881	0.00838758	0.0204881	12.5586	15.0699	11.5258	6.49648	8.78738	8.58663
ENSMUST00000116400.3	ENSMUSG00000022992	Kansl2	protein_coding	4.51621e-05	0.00201244	0.381915	0.0936215	7.13477	0.0501969	0.0034201	0.00462892	0.00972738	0.00972738	14.7665	12.9496	11.2912	19.457	18.2996	18.3296
ENSMUST00000030849.12	ENSMUSG00000028995	Fam126a	protein_coding	4.53791e-05	0.0020202	0.405294	0.0993798	6.49528	0.0574212	0.00259473	0.00758313	0.0122198	0.0122198	2.6701	3.3603	2.71752	4.04841	4.7608	4.09037
ENSMUST00000076623.7	ENSMUSG00000037999	Arap2	protein_coding	4.54359e-05	0.00202083	-0.712724	0.174775	4.96294	0.189048	0.0111568	0.0346627	0.0289805	0.0346627	0.78915	1.02801	0.855197	0.313533	0.548968	0.449385
ENSMUST00000194904.1	ENSMUSG00000062867	Impdh2	protein_coding	4.56454e-05	0.00202824	0.590232	0.144776	5.86632	0.129664	0.0129266	0.0185134	0.0159786	0.0185134	9.72564	8.66029	8.57146	19.9016	12.372	16.5473
ENSMUST00000077798.12	ENSMUSG00000027067	Ssrp1	protein_coding	4.5689e-05	0.00202827	0.346629	0.0850278	9.29702	0.0447211	0.000186918	0.0106577	0.00762746	0.0106577	91.4039	93.3977	101.619	153.535	127.77	120.187
ENSMUST00000097541.9	ENSMUSG00000026483	Fam129a	nonsense_mediated_decay	4.59794e-05	0.00203924	-5.34827	1.3124	2.01878	8.61539	1.80932	-1.76657	0.774277	0.774277	0.544059	0.951556	0.835346	0	0.000414806	0
ENSMUST00000053035.6	ENSMUSG00000046589	Lrrc8e	protein_coding	4.60886e-05	0.00204217	1.33413	0.327423	3.74593	0.597266	0.0448975	0.0342255	0.115911	0.115911	0.158038	0.101833	0.200183	0.698741	0.49962	0.512417
ENSMUST00000156690.7	ENSMUSG00000030557	Mef2a	protein_coding	4.63025e-05	0.00204972	-0.422761	0.103782	6.81987	0.0621435	0.00544375	0.0052131	0.0107123	0.0107123	6.08204	7.5844	5.8553	3.89105	4.57443	4.09644
ENSMUST00000139560.7	ENSMUSG00000028614	Ndc1	protein_coding	4.65746e-05	0.00205885	0.519593	0.127596	7.01139	0.10053	0.00220069	0.0222203	0.0100765	0.0222203	4.53763	6.1978	6.3546	10.201	9.8733	8.12213
ENSMUST00000023449.10	ENSMUSG00000022765	Snap29	protein_coding	4.65958e-05	0.00205885	-0.343889	0.0844505	7.12559	0.0434843	0.000945659	0.00906246	0.00975216	0.00975216	14.7823	12.901	12.2838	8.18315	9.70369	10.0378
ENSMUST00000089011.5	ENSMUSG00000037972	Snn	protein_coding	4.68531e-05	0.00206635	-0.364735	0.0895979	6.80109	0.0442279	0.00125895	0.00413918	0.0107827	0.0107827	11.7146	9.81361	10.2314	7.38103	7.18585	7.15833
ENSMUST00000091813.11	ENSMUSG00000059336	Slc14a1	protein_coding	4.68311e-05	0.00206635	0.975052	0.239517	4.37201	0.305344	0.0375516	-0.012394	0.0485012	0.0485012	0.375311	0.409633	0.420803	1.16359	1.22531	0.818763
ENSMUST00000051809.9	ENSMUSG00000046916	Myct1	protein_coding	4.69406e-05	0.00206827	-2.13806	0.525275	2.95281	1.52275	0.0699806	0.119226	0.34389	0.34389	0.835979	0.536787	0.562995	0.12294	0.0365033	0.0694273
ENSMUST00000032265.12	ENSMUSG00000030162	Olr1	protein_coding	4.72304e-05	0.0020791	-0.889258	0.218549	4.42436	0.29455	0.022975	0.0486703	0.0458776	0.0486703	0.872363	1.71039	1.18802	0.400914	0.600787	0.475781
ENSMUST00000004143.2	ENSMUSG00000020919	Stat5b	protein_coding	4.80867e-05	0.00211483	0.358654	0.0882355	7.08877	0.0438306	0.00182496	0.00472601	0.00985329	0.00985329	4.69769	5.43205	5.36016	7.89049	7.2578	6.7789
ENSMUST00000115454.1	ENSMUSG00000007655	Cav1	protein_coding	4.82141e-05	0.00211846	-1.0543	0.259417	4.42495	0.375232	0.0550963	-0.00288778	0.0458493	0.0458493	8.24741	10.0058	8.33711	2.23233	4.13779	2.99325
ENSMUST00000049908.10	ENSMUSG00000070003	Ssbp4	protein_coding	4.8343e-05	0.00212215	0.418201	0.102917	7.19553	0.0651778	0.00174162	0.0141461	0.00956731	0.0141461	20.6139	17.6169	17.8495	27.1351	24.3788	33.3538
ENSMUST00000114434.8	ENSMUSG00000079560	Hoxa3	protein_coding	4.84735e-05	0.0021259	-0.592931	0.145939	5.13971	0.120023	0.00631086	0.0118802	0.0256364	0.0256364	2.49462	2.98435	1.99892	1.32855	1.44096	1.27155
ENSMUST00000020002.8	ENSMUSG00000078453	Abracl	protein_coding	4.86786e-05	0.00213292	-0.653455	0.160875	7.94908	0.159158	0.0005986	0.0382225	0.00802359	0.0382225	205.701	192.637	203.809	75.3459	111.314	128.691
ENSMUST00000069799.2	ENSMUSG00000055980	Irs1	protein_coding	4.9166e-05	0.00215228	-0.480014	0.118243	6.96933	0.0859017	0.00155931	0.0194128	0.0102049	0.0194128	4.30317	4.61081	3.40743	2.11559	2.85243	2.57085
ENSMUST00000097773.3	ENSMUSG00000073700	Klhl21	protein_coding	4.95849e-05	0.0021686	-0.328467	0.0809514	7.40786	0.0363163	0.000787095	0.0041494	0.00904261	0.00904261	13.0222	12.4802	11.4788	9.4964	8.09331	8.81588
ENSMUST00000029374.7	ENSMUSG00000027799	Nbea	protein_coding	4.97164e-05	0.00217234	-0.742899	0.183117	6.79139	0.205808	0.00126115	0.0490368	0.0108197	0.0490368	2.83136	4.34531	3.24852	1.21222	1.93261	1.75431
ENSMUST00000005256.13	ENSMUSG00000005125	Ndrg1	protein_coding	4.98378e-05	0.00217564	0.453545	0.11181	7.02757	0.0767129	0.0011575	0.0175948	0.0100285	0.0175948	7.35929	8.67574	10.3601	14.382	13.4344	12.882
ENSMUST00000034986.13	ENSMUSG00000032415	Ube2cbp	protein_coding	5.08841e-05	0.00221926	0.656984	0.162157	4.89537	0.158304	0.00900622	0.0270131	0.0304361	0.0304361	1.34204	2.25444	1.53187	3.43807	3.00556	3.07381
ENSMUST00000187531.7	ENSMUSG00000037572	Wdhd1	protein_coding	5.1598e-05	0.00224832	0.454717	0.112324	6.32011	0.0771703	0.00342379	0.0155012	0.0132563	0.0155012	2.59597	3.79223	3.18131	4.67143	5.33719	4.68868
ENSMUST00000077257.11	ENSMUSG00000015846	Rxra	protein_coding	5.17314e-05	0.00224855	0.320111	0.0790853	7.93931	0.0382466	0.000866388	0.00851533	0.00803713	0.00851533	12.3312	11.7177	13.277	19.168	16.0429	15.8343
ENSMUST00000045243.14	ENSMUSG00000038170	Pde4dip	protein_coding	5.16955e-05	0.00224855	-0.347743	0.0859085	7.10746	0.0451338	0.00116253	0.00990788	0.00980159	0.00990788	5.94628	7.67313	6.35758	4.82998	4.87395	4.14807
ENSMUST00000046285.5	ENSMUSG00000036887	C1qa	protein_coding	5.17461e-05	0.00224855	0.77465	0.191385	6.33273	0.223979	0.0021247	0.0528177	0.0131847	0.0528177	9.51239	8.38203	13.8302	21.9933	26.2273	19.0382
ENSMUST00000032141.13	ENSMUSG00000030060	Hmces	protein_coding	5.21415e-05	0.00226365	0.349911	0.0864872	6.99743	0.0413781	0.00110153	0.00470688	0.0101185	0.0101185	18.8682	17.3705	19.3422	24.8731	24.7636	28.2831
ENSMUST00000030014.8	ENSMUSG00000028330	Ncbp1	protein_coding	5.25184e-05	0.00227475	0.29226	0.0722677	8.41463	0.0262976	0.000271061	0.000569946	0.00756288	0.00756288	38.1862	38.6213	38.7812	50.099	49.8357	53.001
ENSMUST00000179620.7	ENSMUSG00000035242	Oaz1	protein_coding	5.25416e-05	0.00227475	0.322501	0.0797474	7.80373	0.0379768	0.00129671	0.0071718	0.00824277	0.00824277	146.452	128.649	148.16	194.807	170.567	203.535
ENSMUST00000033598.8	ENSMUSG00000031246	Sh3bgrl	protein_coding	5.25094e-05	0.00227475	-0.863506	0.213519	8.11846	0.278401	0.000368328	0.0680171	0.00781459	0.0680171	69.8707	75.1553	57.9153	18.6456	33.0519	35.1824
ENSMUST00000023494.12	ENSMUSG00000022803	Popdc2	protein_coding	5.34281e-05	0.00231101	-1.35336	0.334981	4.67273	0.684127	0.0218795	0.146439	0.0362989	0.146439	3.70566	1.57428	3.10108	0.44559	0.891298	0.74661
ENSMUST00000033532.6	ENSMUSG00000031189	Aff2	protein_coding	5.39326e-05	0.0023307	-0.741583	0.183656	4.72653	0.205459	0.0148549	0.0357393	0.0347	0.0357393	0.906024	1.35204	0.935449	0.370262	0.550238	0.574704
ENSMUST00000023225.7	ENSMUSG00000022564	Grina	protein_coding	5.42386e-05	0.00234178	-0.295567	0.0732223	8.23121	0.0313614	0.000340184	0.00610167	0.00770207	0.00770207	73.5209	65.3071	62.801	49.3112	45.3093	54.6132
ENSMUST00000105307.7	ENSMUSG00000020042	Btbd11	protein_coding	5.44889e-05	0.00235044	0.855397	0.211969	4.92741	0.241983	0.0376651	-0.00957584	0.0297311	0.0297311	0.422774	0.497066	0.324554	1.0309	0.823533	1.01809
ENSMUST00000124444.1	ENSMUSG00000060240	Cend1	protein_coding	5.46311e-05	0.00235442	-0.665174	0.164856	5.44402	0.16535	0.0114697	0.0292966	0.0207418	0.0292966	6.38496	4.08608	5.11915	2.85432	2.13709	2.86687
ENSMUST00000029440.9	ENSMUSG00000027848	Olfml3	protein_coding	5.5255e-05	0.00237914	0.751857	0.186463	6.12623	0.211309	0.00724875	0.0449038	0.0143338	0.0449038	1.26585	1.6562	1.6771	3.98366	3.49995	2.3346
ENSMUST00000031273.8	ENSMUSG00000029330	Cds1	protein_coding	5.55118e-05	0.00238802	0.565833	0.140366	5.28704	0.100809	0.00636847	-0.000420386	0.0231855	0.0231855	1.08913	1.00849	1.15249	1.99491	1.75523	1.90874
ENSMUST00000201421.3	ENSMUSG00000058013	Sept11	protein_coding	5.57243e-05	0.00239498	-0.466165	0.115667	6.257	0.0655128	0.00645944	-0.00605974	0.013609	0.013609	8.09626	8.09795	8.2138	5.02823	5.01031	5.09909
ENSMUST00000001384.5	ENSMUSG00000001349	Cnn1	protein_coding	5.61001e-05	0.00240894	-0.48506	0.120403	9.50764	0.0879812	0.00015298	0.0215923	0.00782825	0.0215923	240.592	179.137	207.794	126.793	110.244	144.15
ENSMUST00000030078.11	ENSMUSG00000028383	Hsdl2	protein_coding	5.63704e-05	0.00241835	-0.678164	0.168383	6.06279	0.171995	0.00277306	0.0397562	0.0146973	0.0397562	8.40025	7.55235	6.9296	2.75863	4.60206	4.323
ENSMUST00000027367.13	ENSMUSG00000026176	Ctdsp1	protein_coding	5.68192e-05	0.00243399	0.291943	0.0725208	8.34929	0.0296248	0.000282583	0.00478679	0.00760633	0.00760633	31.2297	33.5848	33.6438	47.5622	41.273	42.1485
ENSMUST00000103122.9	ENSMUSG00000037820	Tgm2	protein_coding	5.6838e-05	0.00243399	-0.594091	0.14758	8.08325	0.132019	0.000366726	0.0323029	0.00785403	0.0323029	36.282	27.9012	30.3438	13.6238	17.3546	21.0838
ENSMUST00000024706.11	ENSMUSG00000023913	Pla2g7	protein_coding	5.71064e-05	0.00244326	-0.534833	0.132896	5.62466	0.100689	0.00826678	0.0103276	0.0182251	0.0182251	5.07061	4.94944	5.61883	2.44796	3.24479	3.41507
ENSMUST00000035092.6	ENSMUSG00000032508	Myd88	protein_coding	5.72228e-05	0.00244603	0.33915	0.0842822	7.13785	0.0377211	0.000936141	0.00308176	0.0097191	0.0097191	15.3252	13.9127	16.0288	21.0241	21.0041	20.7027
ENSMUST00000147632.2	ENSMUSG00000071451	Psmg4	protein_coding	5.79725e-05	0.00247583	0.520053	0.129337	5.47523	0.0883452	0.00482666	0.00418411	0.0202654	0.0202654	12.5188	12.1873	13.8488	19.0541	22.3112	22.4422
ENSMUST00000031740.15	ENSMUSG00000029726	Mepce	protein_coding	5.81024e-05	0.00247717	0.329586	0.0819787	7.32759	0.0392273	0.000843904	0.00745504	0.00923686	0.00923686	10.4047	10.3109	10.6211	16.5685	13.463	13.4655
ENSMUST00000024749.8	ENSMUSG00000023953	Polh	protein_coding	5.81087e-05	0.00247717	0.353812	0.088005	6.94755	0.0381659	0.0013437	-0.000579906	0.0102736	0.0102736	8.11706	8.02729	8.08871	11.4984	11.6586	10.823
ENSMUST00000043870.8	ENSMUSG00000038489	Polr2l	protein_coding	5.83036e-05	0.002481	-0.330703	0.0822731	7.95195	0.0409319	0.000421451	0.00973184	0.00801963	0.00973184	66.4255	52.9609	60.457	43.7475	39.1133	44.5345
ENSMUST00000191127.6	ENSMUSG00000022587	Ly6e	protein_coding	5.82896e-05	0.002481	0.429016	0.10673	6.35241	0.0608662	0.00401496	0.00304712	0.0130721	0.0130721	30.5817	30.3794	33.6899	51.7323	48.0732	43.2236
ENSMUST00000027687.7	ENSMUSG00000026429	Ube2t	protein_coding	5.84448e-05	0.00248477	0.539101	0.134138	5.45652	0.0945774	0.00643862	0.00279681	0.0205509	0.0205509	5.65136	4.79961	5.19455	9.22214	9.49312	7.90502
ENSMUST00000060212.12	ENSMUSG00000019810	Fuca2	protein_coding	5.87723e-05	0.00249645	-0.517075	0.1287	5.55101	0.0890266	0.00569163	0.00532909	0.0191538	0.0191538	5.81333	4.38318	4.90753	2.8107	2.9963	3.02192
ENSMUST00000102715.3	ENSMUSG00000027030	Stk39	protein_coding	5.93795e-05	0.00251997	-0.347535	0.0865536	7.15834	0.0370598	0.00157277	-0.000540811	0.00966451	0.00966451	13.0746	13.7776	12.5641	8.87827	9.54314	9.01054
ENSMUST00000003898.11	ENSMUSG00000022842	Ece2	protein_coding	5.94805e-05	0.002522	4.63122	1.15352	1.62302	6.44815	0.983178	-0.966052	1.01273	1.01273	0	0	7.13497e-06	0.532795	0.372243	0.413724
ENSMUST00000199320.4	ENSMUSG00000029177	Cenpa	protein_coding	5.96186e-05	0.00252558	0.885331	0.220543	4.51018	0.290654	0.0308712	0.0385173	0.0420879	0.0420879	12.342	7.70235	5.6121	16.3568	21.4593	20.1589
ENSMUST00000143044.1	ENSMUSG00000036781	Rps27l	processed_transcript	6.01328e-05	0.00254508	-0.671499	0.167361	5.06644	0.138292	0.0150597	-0.0112865	0.0269546	0.0269546	18.9161	15.8868	17.243	8.79864	8.94908	8.5256
ENSMUST00000034848.13	ENSMUSG00000032301	Psma4	protein_coding	6.07704e-05	0.00256747	-0.414078	0.103266	8.34918	0.0642349	0.000271078	0.0157249	0.00760641	0.0157249	156.7	151.841	173.121	87.0445	116.821	112.818
ENSMUST00000055947.9	ENSMUSG00000047181	Samd14	protein_coding	6.07652e-05	0.00256747	0.354438	0.0883926	6.92502	0.0442405	0.00137346	0.00681724	0.0103464	0.0103464	5.77804	6.4293	6.66723	9.79526	8.4845	8.46762
ENSMUST00000030457.11	ENSMUSG00000028693	Nasp	protein_coding	6.13389e-05	0.00258521	0.393744	0.0982493	6.93207	0.055662	0.00415594	0.00728375	0.0103234	0.0103234	12.7209	12.2266	14.726	17.1318	21.3811	19.5485
ENSMUST00000168747.2	ENSMUSG00000025324	Atp10a	protein_coding	6.13296e-05	0.00258521	0.490208	0.122319	6.83083	0.0900455	0.00163191	0.0208109	0.010672	0.0208109	3.2946	4.37515	3.42048	6.50469	6.46649	4.9082
ENSMUST00000037324.11	ENSMUSG00000036309	Skp1a	protein_coding	6.13546e-05	0.00258521	-0.420252	0.104865	8.4591	0.0661796	0.000345962	0.0161491	0.00753715	0.0161491	167.271	142.431	143.66	82.5981	103.136	109.145
ENSMUST00000023213.7	ENSMUSG00000022554	Hgh1	protein_coding	6.20345e-05	0.00261153	0.366629	0.0915444	6.68274	0.0427935	0.00130242	0.00178308	0.0112681	0.0112681	9.26899	9.31979	8.42399	13.7506	12.0777	12.6278
ENSMUST00000072287.11	ENSMUSG00000038861	Pi4kb	protein_coding	6.2297e-05	0.00261301	0.379249	0.094719	7.1692	0.0537492	0.00382167	0.0094286	0.00963587	0.00963587	8.65311	8.81426	6.70269	12.5979	10.5818	11.5558
ENSMUST00000204293.2	ENSMUSG00000036371	Serbp1	protein_coding	6.23463e-05	0.00261301	0.310908	0.0776542	8.18955	0.0317247	0.00130405	0.00210292	0.00774122	0.00774122	76.3767	79.8076	65.7502	97.3462	101.785	99.0001
ENSMUST00000217345.1	ENSMUSG00000111481	Gm47652	TEC	6.22532e-05	0.00261301	-0.578067	0.144369	5.1909	0.107097	0.00650396	0.0020575	0.0247595	0.0247595	1.40774	1.7682	1.5515	0.788732	0.941935	0.880207
ENSMUST00000092486.10	ENSMUSG00000059901	Adamts14	protein_coding	6.2311e-05	0.00261301	0.604757	0.151043	5.72404	0.137096	0.00493082	0.02929	0.0171755	0.02929	0.830508	1.21735	1.20159	2.20613	1.94423	1.68954
ENSMUST00000004868.5	ENSMUSG00000004748	Mtfp1	protein_coding	6.21694e-05	0.00261301	0.993688	0.248148	4.05711	0.33326	0.0205061	0.0257876	0.0718598	0.0718598	0.548189	0.698672	0.940102	2.12433	1.75281	1.88426
ENSMUST00000066211.4	ENSMUSG00000053647	Gper1	protein_coding	6.26183e-05	0.00262209	0.95388	0.238308	4.17539	0.327686	0.0240682	0.0443322	0.0611178	0.0611178	0.297714	0.44703	0.548432	1.27819	1.12698	0.874699
ENSMUST00000018744.14	ENSMUSG00000020534	Shmt1	protein_coding	6.26871e-05	0.00262264	0.611741	0.152841	6.58292	0.140301	0.00632899	0.0287117	0.0117431	0.0287117	4.12403	6.03254	6.54688	10.8769	9.77324	9.18803
ENSMUST00000163884.7	ENSMUSG00000002845	Tmem39a	protein_coding	6.34423e-05	0.00265189	0.403128	0.100791	6.51672	0.0517637	0.00314091	0.000621467	0.0120975	0.0120975	9.14352	10.0567	11.0896	14.7093	15.2973	14.7756
ENSMUST00000027581.6	ENSMUSG00000026343	Gpr39	protein_coding	6.35881e-05	0.00265563	-0.522123	0.130561	5.59368	0.0855354	0.00697078	-0.00228111	0.0185983	0.0185983	3.54235	4.05379	3.30325	2.20007	2.05183	2.09585
ENSMUST00000031224.14	ENSMUSG00000029287	Tgfbr3	protein_coding	6.37906e-05	0.00266174	1.1268	0.281817	5.58729	0.476208	0.0150464	0.104085	0.0186783	0.104085	0.452114	1.00947	0.782042	2.52096	2.56049	1.57335
ENSMUST00000089174.5	ENSMUSG00000068114	Ccdc134	protein_coding	6.40355e-05	0.0026696	0.419846	0.105029	6.39259	0.056558	0.00370874	0.000887192	0.0128379	0.0128379	7.46471	6.23041	6.57391	9.94412	10.3924	9.96485
ENSMUST00000237276.1	ENSMUSG00000036223	Ska1	nonsense_mediated_decay	6.41817e-05	0.00267333	0.811313	0.202986	4.83141	0.214633	0.0298715	-0.00841575	0.0319337	0.0319337	2.40205	2.43125	2.52994	4.69333	5.02916	6.82998
ENSMUST00000034280.8	ENSMUSG00000031823	Zdhhc7	protein_coding	6.43942e-05	0.00267982	0.337916	0.0845613	7.11252	0.0385964	0.000938225	0.00448714	0.0097877	0.0097877	8.67757	8.47844	9.07656	13.3562	11.3615	11.7211
ENSMUST00000027941.13	ENSMUSG00000026628	Atf3	protein_coding	6.50669e-05	0.00270543	0.47864	0.119851	5.7416	0.0746253	0.00453568	0.00283493	0.0170106	0.0170106	3.91716	3.17079	3.55908	5.34034	5.94751	5.59588
ENSMUST00000055294.3	ENSMUSG00000050069	Grem2	protein_coding	6.54693e-05	0.00271738	0.446003	0.111719	8.03957	0.0746529	0.00048003	0.0182417	0.00790586	0.0182417	16.6674	20.3124	22.3229	32.4604	32.5688	26.2028
ENSMUST00000040381.14	ENSMUSG00000039804	Ncoa5	protein_coding	6.54149e-05	0.00271738	0.382498	0.0958071	7.36831	0.0538992	0.00463052	0.00787916	0.00913799	0.00913799	10.26	13.2655	9.94901	16.9082	14.9717	16.3483
ENSMUST00000045730.6	ENSMUSG00000038587	Akap12	protein_coding	6.56204e-05	0.00272126	-0.529748	0.132715	8.83688	0.105326	0.0028348	0.023585	0.00744225	0.023585	32.5927	49.1523	35.0245	19.8017	24.0331	23.1701
ENSMUST00000228768.1	ENSMUSG00000045211	Nudt18	protein_coding	6.5963e-05	0.00273307	-0.429701	0.107684	6.09424	0.0566743	0.00287839	-0.00127675	0.0145153	0.0145153	10.1149	9.68208	9.59531	5.94012	6.36326	6.59239
ENSMUST00000061890.7	ENSMUSG00000025821	Zfp282	protein_coding	6.6194e-05	0.00273981	0.332564	0.0833583	7.20436	0.0365542	0.000878345	0.00333999	0.00954456	0.00954456	5.60924	5.22935	5.03031	7.91236	6.81497	7.188
ENSMUST00000024866.5	ENSMUSG00000024066	Xdh	protein_coding	6.62417e-05	0.00273981	4.2759	1.07182	1.4448	5.6529	0.593025	-0.383144	1.13016	1.13016	0	0	0	0.145859	0.442803	0.136371
ENSMUST00000029002.8	ENSMUSG00000027500	Stmn2	protein_coding	6.67604e-05	0.00275884	-0.549777	0.137874	5.38766	0.10489	0.006906	0.0108616	0.0216077	0.0216077	4.73796	3.87863	4.60029	2.25947	2.35255	2.92623
ENSMUST00000029625.7	ENSMUSG00000027996	Sfrp2	protein_coding	6.71253e-05	0.00276908	1.34205	0.336669	6.27187	0.676341	0.00323028	0.166788	0.0135265	0.166788	3.04471	4.35808	4.61837	24.1352	16.3491	8.36295
ENSMUST00000173135.7	ENSMUSG00000068921	Dap3	protein_coding	6.71251e-05	0.00276908	0.382956	0.0960692	7.13943	0.0550717	0.00237442	0.0114695	0.00971486	0.0114695	22.4016	20.22	25.5581	36.1851	30.2876	31.7625
ENSMUST00000004587.10	ENSMUSG00000004473	Clec11a	protein_coding	6.81037e-05	0.00280699	1.02015	0.256138	4.77014	0.390939	0.0189735	0.0794364	0.0334978	0.0794364	0.479212	0.712802	0.83668	2.45835	1.90736	1.26898
ENSMUST00000211811.1	ENSMUSG00000031808	Slc27a1	retained_intron	6.85689e-05	0.0028237	-0.535749	0.13457	5.81277	0.100502	0.0107692	0.00722349	0.0163943	0.0163943	5.14642	4.79979	4.43045	2.98593	2.2623	3.12687
ENSMUST00000064393.5	ENSMUSG00000024785	Rcl1	protein_coding	6.91538e-05	0.00284531	0.323224	0.0812289	7.4365	0.032404	0.000923049	0.000404205	0.00897416	0.00897416	24.228	22.6104	23.5951	32.6992	31.2329	32.0025
ENSMUST00000023807.6	ENSMUSG00000023046	Igfbp6	protein_coding	6.98553e-05	0.00287167	0.463846	0.116639	7.29585	0.0808715	0.000793886	0.019613	0.00931468	0.019613	26.5004	28.5713	34.7636	52.9258	43.379	44.6181
ENSMUST00000115668.9	ENSMUSG00000031154	Otud5	protein_coding	7.01572e-05	0.00288157	0.428732	0.107837	6.83862	0.0557824	0.00679954	-0.00600081	0.0106436	0.0106436	8.34596	8.02306	8.08462	12.6873	12.0481	12.3813
ENSMUST00000038053.13	ENSMUSG00000033306	Lpp	protein_coding	7.07875e-05	0.00290493	-0.726374	0.182799	8.96245	0.198384	0.000156378	0.0499668	0.00745955	0.0499668	17.4801	29.1156	21.4997	8.57199	12.9491	10.6906
ENSMUST00000072239.13	ENSMUSG00000019961	Tmpo	protein_coding	7.12435e-05	0.00292111	0.421102	0.106015	7.4429	0.066685	0.0016033	0.0152555	0.00895907	0.0152555	13.2192	14.8045	10.5136	17.2284	20.3823	19.7609
ENSMUST00000000304.13	ENSMUSG00000000295	Hddc2	protein_coding	7.15315e-05	0.00293037	-0.455085	0.114598	5.85065	0.0705207	0.00360266	0.00688478	0.0160965	0.0160965	18.5144	17.0337	19.3595	9.89909	12.5703	11.799
ENSMUST00000148042.2	ENSMUSG00000026974	Zmynd19	protein_coding	7.16527e-05	0.00293279	0.418493	0.105394	6.26149	0.0565526	0.00307786	0.00193692	0.0135841	0.0135841	12.8174	11.2367	12.7139	18.7646	17.3707	18.798
ENSMUST00000033135.8	ENSMUSG00000030846	Tial1	protein_coding	7.17308e-05	0.00293345	0.336951	0.0848642	7.2976	0.0375667	0.00149253	0.00288985	0.00931037	0.00931037	26.871	24.1981	27.798	35.3245	37.0762	36.8554
ENSMUST00000094604.8	ENSMUSG00000027207	Galk2	protein_coding	7.18202e-05	0.00293456	-0.336277	0.0847009	7.16396	0.0425339	0.00100348	0.00975789	0.00964967	0.00975789	28.5306	23.0647	21.7341	16.0185	17.3317	17.9349
ENSMUST00000223999.1	ENSMUSG00000025290	Rps24	protein_coding	7.21829e-05	0.00294683	-0.806048	0.203087	7.43343	0.244407	0.00268193	0.0591847	0.00898141	0.0591847	266.13	196.157	251.657	75.2004	107.638	137.12
ENSMUST00000009693.14	ENSMUSG00000009549	Srp14	protein_coding	7.25901e-05	0.0029609	-0.298467	0.0752255	7.8794	0.0305822	0.000364359	0.00445739	0.00812395	0.00812395	142.63	125.382	137.041	92.2213	103.27	101.713
ENSMUST00000027495.14	ENSMUSG00000026276	Sept2	protein_coding	7.29882e-05	0.00297457	-0.624928	0.157558	6.63524	0.14695	0.0254603	0.0117767	0.0114859	0.0117767	8.70658	7.76605	12.3851	4.61135	4.69792	5.65477
ENSMUST00000021413.8	ENSMUSG00000021025	Nfkbia	protein_coding	7.33265e-05	0.00298578	0.332042	0.0837385	7.28615	0.0411549	0.00117956	0.00891963	0.00933863	0.00933863	23.923	22.8743	23.9163	36.6038	33.5692	27.9767
ENSMUST00000031879.4	ENSMUSG00000029851	Tcaf2	protein_coding	7.37177e-05	0.00299724	-0.392745	0.0990791	6.39744	0.0492039	0.00191576	0.0017458	0.0128092	0.0128092	4.3283	4.78824	4.79992	2.97697	3.32621	2.95925
ENSMUST00000033184.5	ENSMUSG00000030894	Tpp1	protein_coding	7.37348e-05	0.00299724	-0.326444	0.0823541	7.8184	0.0401083	0.000681654	0.00949165	0.00821893	0.00949165	23.3284	27.2957	23.9323	19.815	17.726	15.5396
ENSMUST00000022245.9	ENSMUSG00000021731	Mrps30	protein_coding	7.38794e-05	0.00300053	0.306038	0.0772153	7.63617	0.0339869	0.00039966	0.00696181	0.00854365	0.00854365	19.0701	17.2314	15.5297	22.6726	21.9952	24.6404
ENSMUST00000007251.13	ENSMUSG00000007036	Abhd16a	protein_coding	7.48173e-05	0.00303601	0.326161	0.0823551	7.28349	0.0383413	0.000828335	0.00720545	0.0093452	0.0093452	17.3976	15.1004	17.968	24.7359	22.1067	22.3673
ENSMUST00000026008.8	ENSMUSG00000025034	Trim8	protein_coding	7.48934e-05	0.00303649	0.319839	0.0807637	7.37343	0.0350146	0.000658537	0.00474844	0.00912563	0.00912563	9.85596	10.3297	8.86388	14.4849	12.8919	12.2626
ENSMUST00000179030.7	ENSMUSG00000052331	Ankrd44	protein_coding	7.49864e-05	0.00303766	-0.502244	0.126833	5.89895	0.0816528	0.00838757	-0.000914959	0.0157424	0.0157424	2.59173	2.10109	2.25449	1.31928	1.45102	1.36228
ENSMUST00000169256.4	ENSMUSG00000063455	D630045J12Rik	protein_coding	7.53486e-05	0.0030471	5.40905	1.36636	2.4557	8.80557	2.25574	-2.22046	0.544666	0.544666	0.000378234	0.000877718	0.000837697	0.530107	0.405049	0.344031
ENSMUST00000236121.1	ENSMUSG00000034371	Tkfc	nonsense_mediated_decay	7.53389e-05	0.0030471	3.65333	0.922847	1.89622	4.70419	0.433547	0.441626	0.843922	0.843922	0	0	0.0476874	0.479218	0.418706	0.433316
ENSMUST00000072639.9	ENSMUSG00000047821	Trim16	protein_coding	7.55054e-05	0.00304822	-0.815928	0.206134	5.69169	0.250711	0.0139982	0.0497388	0.0174946	0.0497388	6.93764	5.04897	7.96784	2.12165	3.2191	3.36027
ENSMUST00000121799.7	ENSMUSG00000049807	Arhgap23	protein_coding	7.54733e-05	0.00304822	-0.348313	0.0879947	7.85415	0.0403154	0.00345217	0.00144637	0.00816245	0.00816245	12.7785	14.1612	11.2916	9.1604	8.98624	8.52537
ENSMUST00000142118.2	ENSMUSG00000036545	Adamts2	protein_coding	7.58668e-05	0.00305759	0.992353	0.250778	4.79236	0.353051	0.0614199	0.0106065	0.0329146	0.0329146	0.238373	0.39989	0.478768	0.986343	1.0047	0.891656
ENSMUST00000023502.5	ENSMUSG00000022808	Snx4	protein_coding	7.5851e-05	0.00305759	-0.369833	0.0934596	7.19847	0.0480228	0.00354235	0.00519494	0.00955971	0.00955971	15.7238	16.8433	16.4202	9.49867	12.2845	11.6177
ENSMUST00000003386.6	ENSMUSG00000003299	Mrpl4	protein_coding	7.59496e-05	0.00305832	0.300564	0.0759608	7.83884	0.0312916	0.00046871	0.00476878	0.00818635	0.00818635	49.622	45.108	50.6013	66.4518	60.2235	66.9998
ENSMUST00000023830.15	ENSMUSG00000023068	Nus1	protein_coding	7.6071e-05	0.0030606	-0.314522	0.0794961	7.61744	0.0372608	0.000481781	0.00899765	0.00858062	0.00899765	16.39	19.055	15.5876	10.9881	13.6557	12.14
ENSMUST00000032704.11	ENSMUSG00000030493	Faap24	protein_coding	7.6364e-05	0.00306977	0.465128	0.117589	5.92627	0.0733728	0.00518771	0.00539933	0.0155531	0.0155531	5.0723	4.2855	4.77476	8.41	6.91446	6.94745
ENSMUST00000061826.2	ENSMUSG00000043300	B3galnt1	protein_coding	7.69865e-05	0.00309216	0.382858	0.0968381	6.48016	0.0462238	0.00175802	0.00105398	0.0123084	0.0123084	8.65504	9.27436	8.59768	12.0031	13.8959	12.5172
ENSMUST00000027503.13	ENSMUSG00000026281	Dtymk	protein_coding	7.72233e-05	0.00309745	0.346084	0.0875528	6.98358	0.040795	0.00133745	0.00474108	0.0101608	0.0101608	33.5738	28.0393	32.0251	42.4631	42.5714	45.1718
ENSMUST00000053819.5	ENSMUSG00000028911	Srsf4	protein_coding	7.72493e-05	0.00309745	0.32898	0.0832275	7.49079	0.0407805	0.000748305	0.00964192	0.00884901	0.00964192	16.1409	19.3204	20.6413	27.0811	25.366	24.1802
ENSMUST00000041543.8	ENSMUSG00000037428	Vgf	protein_coding	7.7391e-05	0.0031005	0.795642	0.201309	5.38216	0.238544	0.0268219	0.0339662	0.0216928	0.0339662	1.26231	1.92103	1.07368	3.80036	2.96124	2.51448
ENSMUST00000034989.14	ENSMUSG00000032418	Me1	protein_coding	7.75488e-05	0.00310419	-0.281723	0.0712888	8.86352	0.0278685	0.000179268	0.00489343	0.00744388	0.00744388	82.9732	74.5797	72.2596	53.5503	56.4318	60.8715
ENSMUST00000079724.8	ENSMUSG00000027944	Hax1	protein_coding	7.7991e-05	0.00311661	0.335228	0.0848572	8.01225	0.0423541	0.00068355	0.0101176	0.00793991	0.0101176	66.8457	65.8522	78.7515	89.2799	94.9487	105.996
ENSMUST00000087674.5	ENSMUSG00000067438	Hmx1	protein_coding	7.79832e-05	0.00311661	-0.939756	0.237882	4.15707	0.319729	0.0222867	0.0461965	0.062595	0.062595	2.36907	1.58716	1.41237	0.652081	0.898416	0.517423
ENSMUST00000109972.8	ENSMUSG00000055762	Eef1d	protein_coding	7.9121e-05	0.00315909	0.385685	0.0977149	6.91844	0.0558772	0.00395426	0.0101099	0.010368	0.010368	15.5573	12.9451	16.295	22.609	19.5706	23.0525
ENSMUST00000054538.12	ENSMUSG00000051517	Arhgef39	protein_coding	7.92795e-05	0.00316274	0.692233	0.175401	4.84041	0.152107	0.0144332	-0.00399399	0.0317152	0.0317152	1.64334	1.2929	1.58752	3.01965	2.99071	2.89421
ENSMUST00000023854.9	ENSMUSG00000023092	Fhl1	protein_coding	8.00853e-05	0.00319219	-1.10362	0.279813	7.46038	0.459348	0.0131819	0.104261	0.00891835	0.104261	57.4614	37.2401	27.5444	8.75497	14.9598	15.7014
ENSMUST00000204079.1	ENSMUSG00000108194	1700097M23Rik	TEC	8.04674e-05	0.00320202	-1.15419	0.292719	4.52336	0.502468	0.0195002	0.109026	0.0415555	0.109026	3.86281	3.82227	4.34355	1.88542	1.40635	0.700787
ENSMUST00000024967.13	ENSMUSG00000024151	Msh2	protein_coding	8.04409e-05	0.00320202	0.34878	0.0884537	6.84755	0.0394978	0.00112458	0.00262979	0.0106115	0.0106115	6.42539	7.51286	7.43876	9.64147	9.9755	10.167
ENSMUST00000201464.1	ENSMUSG00000023104	Rfc2	retained_intron	8.06102e-05	0.003205	0.359116	0.0910866	6.77101	0.0473281	0.00154613	0.00925237	0.010899	0.010899	32.1632	26.9826	30.1593	47.1143	38.3438	40.0682
ENSMUST00000023043.9	ENSMUSG00000022407	Adsl	protein_coding	8.09091e-05	0.00320878	0.523191	0.132733	5.92326	0.0953342	0.0108533	0.00566628	0.0155736	0.0155736	2.10627	2.35919	2.37934	4.55724	3.32172	3.59398
ENSMUST00000057410.13	ENSMUSG00000006369	Fbln1	protein_coding	8.0775e-05	0.00320878	0.65417	0.165945	6.72932	0.161427	0.00259385	0.0387128	0.0110679	0.0387128	3.7845	4.88594	4.76614	10.9195	8.33942	6.65285
ENSMUST00000130360.1	ENSMUSG00000043079	Synpo	protein_coding	8.08889e-05	0.00320878	-0.46559	0.118118	7.73132	0.0817743	0.00486415	0.0160635	0.00836628	0.0160635	12.0192	13.2776	16.7238	7.91806	9.34618	8.65717
ENSMUST00000027467.10	ENSMUSG00000026249	Serpine2	protein_coding	8.16273e-05	0.00323455	-0.34127	0.0866263	8.72644	0.0439446	0.000224576	0.0110316	0.00744721	0.0110316	99.8158	108.682	98.5008	82.0105	73.1201	61.211
ENSMUST00000184272.2	ENSMUSG00000094800	Gm9780	protein_coding	8.1768e-05	0.00323741	0.672915	0.170827	5.95447	0.170863	0.00842877	0.0353441	0.0153651	0.0353441	38.5697	51.9145	33.5818	99.4723	78.0562	62.3436
ENSMUST00000107485.7	ENSMUSG00000052915	Msl1	protein_coding	8.19927e-05	0.00324087	0.341524	0.0867141	7.01281	0.0409983	0.00120676	0.00630169	0.0100723	0.0100723	12.4576	13.5889	10.6558	17.4661	15.808	17.7341
ENSMUST00000052778.9	ENSMUSG00000049823	Zbtb12	protein_coding	8.19365e-05	0.00324087	0.462905	0.117528	5.69314	0.074378	0.00323951	0.0093777	0.0174799	0.0174799	3.31457	3.01139	3.88706	5.58475	5.28566	5.15153
ENSMUST00000204542.2	ENSMUSG00000049107	Ntf3	protein_coding	8.27683e-05	0.00326879	-0.78758	0.200084	4.68592	0.210365	0.0241563	0.00619374	0.0358944	0.0358944	4.46293	3.22827	4.29975	2.07433	1.50928	1.78247
ENSMUST00000113820.8	ENSMUSG00000006304	Arpc2	protein_coding	8.32638e-05	0.00328562	-0.284216	0.0722313	9.04373	0.0302492	0.000342158	0.0071773	0.00748388	0.00748388	223.105	202.289	250.706	162.766	169.667	168.537
ENSMUST00000024338.4	ENSMUSG00000023571	C1qtnf12	protein_coding	8.37843e-05	0.00330339	0.368022	0.0935654	6.59485	0.0489097	0.00144896	0.00889826	0.0116828	0.0116828	14.9285	12.4841	11.5096	17.6648	17.3726	20.2657
ENSMUST00000174259.7	ENSMUSG00000022216	Psme1	protein_coding	8.40445e-05	0.00331089	0.310972	0.0790761	7.61159	0.0325021	0.00078724	0.00357656	0.00859231	0.00859231	47.5286	45.3972	51.1134	64.6748	67.5319	61.5414
ENSMUST00000087978.4	ENSMUSG00000067586	S1pr3	protein_coding	8.4951e-05	0.00334381	0.699126	0.177895	8.03181	0.184609	0.000411119	0.047059	0.0079154	0.047059	9.81622	14.6897	15.6544	30.7041	26.8794	21.6601
ENSMUST00000111994.9	ENSMUSG00000056234	Ncoa4	protein_coding	8.52753e-05	0.00335378	-0.311079	0.0791736	7.66287	0.0342167	0.00091058	0.00557156	0.00849212	0.00849212	22.474	25.6715	22.2582	15.1233	18.061	17.4872
ENSMUST00000033898.9	ENSMUSG00000031502	Col4a1	protein_coding	8.65595e-05	0.00340146	-0.580267	0.147821	10.2708	0.127234	5.93171e-05	0.0327172	0.00927471	0.0327172	112.742	164.488	145.754	90.34	77.7419	65.0682
ENSMUST00000165628.8	ENSMUSG00000038697	Taf5l	protein_coding	8.67495e-05	0.00340609	0.454301	0.115747	6.85853	0.0697005	0.00952368	0.000205769	0.0105724	0.0105724	7.87742	7.28006	6.06919	10.1635	10.9868	11.7122
ENSMUST00000102803.10	ENSMUSG00000053093	Myh7	protein_coding	8.75275e-05	0.00343378	-2.58944	0.660101	3.01437	2.30667	0.331093	0.0377963	0.322507	0.322507	0.336139	0.327053	0.268868	0.00901817	0.056924	0.0167317
ENSMUST00000176760.1	ENSMUSG00000093577	Gm20632	lncRNA	8.79641e-05	0.00344805	-0.954923	0.243504	4.26014	0.301249	0.0338772	0.000730208	0.0550638	0.0550638	1.41642	1.37365	1.49586	0.518182	0.427404	0.708678
ENSMUST00000067298.4	ENSMUSG00000054312	Mrps21	protein_coding	8.81941e-05	0.0034542	-0.359214	0.0916136	7.26811	0.0426027	0.0032062	0.0016592	0.00938338	0.00938338	152.997	136.546	155.847	99.7046	98.9307	105.298
ENSMUST00000031590.11	ENSMUSG00000029594	Rbm19	protein_coding	8.86534e-05	0.00346931	0.29588	0.0754849	7.88421	0.0322541	0.00043022	0.00705821	0.00811674	0.00811674	14.6208	13.529	15.3394	21.2888	17.9637	18.5658
ENSMUST00000021813.4	ENSMUSG00000021381	Barx1	protein_coding	8.91735e-05	0.00348677	0.935257	0.238689	4.22381	0.330779	0.0210092	0.0644496	0.0575213	0.0644496	1.09215	0.736354	0.726039	1.43668	2.87417	2.30587
ENSMUST00000031587.12	ENSMUSG00000029591	Ung	protein_coding	9.09981e-05	0.00355517	0.845847	0.21614	5.54534	0.270697	0.0280887	0.0419861	0.0192315	0.0419861	2.80599	3.01845	1.49858	5.82848	4.87093	5.49833
ENSMUST00000148665.7	ENSMUSG00000020211	Sf3a2	protein_coding	9.17712e-05	0.00358241	0.284301	0.0726857	8.35043	0.030175	0.000319301	0.00708932	0.00760551	0.00760551	39.9332	41.7023	43.8508	59.6836	49.7376	56.9675
ENSMUST00000124533.2	ENSMUSG00000030802	Bckdk	protein_coding	9.29671e-05	0.0036261	0.336079	0.0859923	7.45303	0.0427584	0.00171821	0.0093738	0.00893539	0.0093738	22.6785	20.7044	25.2157	34.2217	28.7972	31.822
ENSMUST00000045847.14	ENSMUSG00000040857	Erf	protein_coding	9.3139e-05	0.00362821	0.279512	0.0715266	8.55946	0.0261244	0.000183668	0.00317424	0.00749042	0.00749042	32.0958	31.607	31.784	43.5662	38.6683	43.704
ENSMUST00000076817.4	ENSMUSG00000019820	Utrn	protein_coding	9.31747e-05	0.00362821	-0.580618	0.148583	7.59301	0.127627	0.00142813	0.031687	0.00862989	0.031687	4.82141	7.55565	6.15374	3.06396	3.96985	3.08565
ENSMUST00000022784.8	ENSMUSG00000022177	Haus4	protein_coding	9.35741e-05	0.00364076	0.368186	0.0942454	6.55689	0.0460523	0.00144488	0.00528503	0.0118784	0.0118784	10.1624	9.91733	10.9091	16.4395	13.9525	13.8691
ENSMUST00000156038.1	ENSMUSG00000044864	Ankrd50	protein_coding	9.38783e-05	0.00364959	-0.311654	0.0797907	7.72732	0.0367783	0.000949415	0.00860042	0.00837339	0.00860042	9.34185	12.017	9.75466	7.97944	7.15475	7.23681
ENSMUST00000154199.7	ENSMUSG00000030409	Dmpk	nonsense_mediated_decay	9.39989e-05	0.00365127	-0.911073	0.233274	5.40708	0.306924	0.0603171	0.012068	0.0213084	0.0213084	2.37687	3.67815	3.2872	1.7179	1.00375	1.04359
ENSMUST00000119597.7	ENSMUSG00000037455	Slc18b1	protein_coding	9.44344e-05	0.00366517	0.462237	0.118387	5.70132	0.0658973	0.0036256	-0.00137765	0.0173976	0.0173976	2.43196	2.65014	2.60806	4.08669	4.19503	3.7622
ENSMUST00000103231.4	ENSMUSG00000029019	Nppb	protein_coding	9.51606e-05	0.00367591	-1.15518	0.296001	5.54593	0.50547	0.00547698	0.125948	0.0192234	0.125948	27.1395	16.6266	18.55	4.31252	5.55139	10.2442
ENSMUST00000089651.5	ENSMUSG00000068335	Dok1	protein_coding	9.49856e-05	0.00367591	0.288756	0.0739821	8.17173	0.0278868	0.000451209	0.00313976	0.00775882	0.00775882	47.766	44.8823	45.1861	64.0824	55.7011	61.9993
ENSMUST00000100864.6	ENSMUSG00000072704	Smim10l1	protein_coding	9.50721e-05	0.00367591	-0.383342	0.0982214	6.41133	0.0517635	0.00174472	0.007853	0.0127264	0.0127264	9.87523	9.26399	7.86207	5.45367	6.264	6.30631
ENSMUST00000108689.7	ENSMUSG00000020908	Myh3	protein_coding	9.49749e-05	0.00367591	-5.29472	1.35655	1.97916	8.45402	1.96396	-1.90921	0.796369	0.796369	0.378063	0.648775	0.340051	7.66668e-05	3.65775e-05	4.77123e-05
ENSMUST00000039949.4	ENSMUSG00000039055	Eme1	protein_coding	9.51781e-05	0.00367591	0.453283	0.11615	5.77931	0.0755323	0.00356214	0.0138036	0.0166741	0.0166741	2.42037	3.38546	3.0766	4.92755	4.41661	4.344
ENSMUST00000021078.2	ENSMUSG00000018861	Fdxr	protein_coding	9.5098e-05	0.00367591	0.44969	0.115223	5.8417	0.0666182	0.00374944	0.00369053	0.0161651	0.0161651	3.31746	3.81269	3.9355	5.74104	5.46645	5.91769
ENSMUST00000047153.3	ENSMUSG00000042124	Lce1f	protein_coding	9.53912e-05	0.00367813	-1.38884	0.355929	3.82285	0.730688	0.0314958	0.158532	0.102647	0.158532	4.32984	3.70301	4.49637	0.848446	0.600028	1.96516
ENSMUST00000108495.8	ENSMUSG00000030374	Strn4	protein_coding	9.53384e-05	0.00367813	0.29015	0.0743563	8.13367	0.0281829	0.000495103	0.00316333	0.00779818	0.00779818	23.722	24.2329	24.5632	34.8734	30.3601	31.0206
ENSMUST00000014777.8	ENSMUSG00000052560	Cpne8	protein_coding	9.64218e-05	0.00371484	-0.530506	0.136047	5.45401	0.0972028	0.00717423	0.0087903	0.0205891	0.0205891	17.5131	13.5037	13.4882	8.31232	8.07646	9.4586
ENSMUST00000028045.3	ENSMUSG00000026712	Mrc1	protein_coding	9.67974e-05	0.00372491	1.23453	0.31667	4.11528	0.577557	0.0482916	0.102128	0.0662151	0.102128	0.108279	0.242971	0.24913	0.53193	0.921838	0.538319
ENSMUST00000098782.3	ENSMUSG00000060594	Layn	protein_coding	9.68411e-05	0.00372491	0.379444	0.0973339	6.51111	0.0478347	0.00208171	0.00371995	0.0121291	0.0121291	8.75704	9.12702	10.3737	13.2667	13.3307	14.0071
ENSMUST00000140920.1	ENSMUSG00000039929	Urb1	protein_coding	9.7008e-05	0.0037283	0.371758	0.0953725	6.5752	0.0487233	0.00186116	0.00721659	0.0117827	0.0117827	1.98066	2.19234	2.29097	3.44103	3.05213	2.77191
ENSMUST00000106429.5	ENSMUSG00000054091	1810037I17Rik	protein_coding	9.71096e-05	0.00372917	-0.313216	0.0803592	7.43967	0.0353223	0.000719717	0.00664407	0.00896668	0.00896668	62.417	57.5124	63.2805	39.0552	45.6971	47.5409
ENSMUST00000025562.8	ENSMUSG00000024660	Incenp	protein_coding	9.75922e-05	0.00374465	0.430799	0.11056	7.40179	0.0703446	0.00217124	0.0161642	0.00905722	0.0161642	9.96218	10.7554	12.1407	19.5595	16.3811	14.3622
ENSMUST00000092143.11	ENSMUSG00000051236	Msrb3	protein_coding	9.77836e-05	0.00374895	-0.54603	0.14015	8.16258	0.113015	0.000387562	0.0290757	0.00776807	0.0290757	35.7013	39.7324	36.3538	16.1048	24.9711	23.9262
ENSMUST00000048716.10	ENSMUSG00000037946	Fgd3	protein_coding	9.80251e-05	0.00375437	-0.569014	0.146072	6.61559	0.122738	0.00439229	0.0276134	0.0115802	0.0276134	8.83799	6.8557	6.53549	3.38214	4.08109	5.02249
ENSMUST00000161785.7	ENSMUSG00000047003	Zfp41	protein_coding	9.80838e-05	0.00375437	0.591107	0.151749	5.08325	0.111677	0.00789706	0.000671553	0.0266447	0.0266447	0.990221	0.83238	0.920572	1.79671	1.59448	1.51096
ENSMUST00000111275.7	ENSMUSG00000015950	Ncf1	protein_coding	9.8382e-05	0.00376273	0.862811	0.221543	5.26088	0.28223	0.00827887	0.0653432	0.0236059	0.0653432	1.0591	1.10437	1.83401	3.19522	3.62305	2.38245
ENSMUST00000060972.4	ENSMUSG00000045534	Kcna5	protein_coding	9.87842e-05	0.00377506	-1.65949	0.426214	3.32867	0.853827	0.0544234	-0.0198534	0.218064	0.218064	0.649901	0.680547	0.470471	0.0868046	0.111161	0.130259
ENSMUST00000147294.2	ENSMUSG00000052951	C130021I20Rik	lncRNA	9.90047e-05	0.00378043	0.590299	0.15163	5.61243	0.132126	0.00496133	0.0295262	0.0183695	0.0295262	1.46187	1.25864	1.59016	3.30801	2.30286	2.20036
ENSMUST00000080953.11	ENSMUSG00000027070	Lrp2	protein_coding	9.96244e-05	0.00379795	-0.549605	0.141232	5.39389	0.114556	0.00425838	0.0256614	0.0215115	0.0256614	0.455071	0.62188	0.484621	0.358097	0.289587	0.244098
ENSMUST00000108101.7	ENSMUSG00000018648	Dusp14	protein_coding	9.96202e-05	0.00379795	-0.998249	0.256519	4.68267	0.375124	0.0627101	0.0325075	0.0359932	0.0359932	4.99087	4.71749	5.24649	1.10776	2.56818	2.07048
ENSMUST00000178328.7	ENSMUSG00000019528	Gyg	protein_coding	9.98261e-05	0.00380257	-0.315237	0.0810166	7.49251	0.0318638	0.00100039	0.00156408	0.00884515	0.00884515	41.7063	37.7274	39.6667	29.0475	28.532	28.051
ENSMUST00000049937.12	ENSMUSG00000001017	Chtop	protein_coding	0.000100164	0.00380928	0.326258	0.0838668	7.57018	0.0385056	0.00187346	0.00634188	0.00867699	0.00867699	24.3532	27.1527	22.6339	37.7821	32.8954	30.7744
ENSMUST00000208402.1	ENSMUSG00000039405	Prss23	protein_coding	0.000100152	0.00380928	-0.438336	0.112676	6.1809	0.0728721	0.00501475	0.0140234	0.0140292	0.0140292	34.8148	31.647	27.2736	18.2835	24.185	17.3857
ENSMUST00000089510.4	ENSMUSG00000068267	Cenpb	protein_coding	0.000100707	0.0038247	0.29301	0.0753457	9.21076	0.0325689	0.00010708	0.00840837	0.00756686	0.00840837	47.4369	41.5091	46.4498	66.956	55.8894	57.4349
ENSMUST00000102744.3	ENSMUSG00000028587	Orc1	protein_coding	0.000100731	0.0038247	0.45948	0.118154	5.78585	0.0672057	0.00432244	0.000513837	0.0166181	0.0166181	2.32114	2.85844	2.54702	4.03115	4.095	3.90223
ENSMUST00000065291.1	ENSMUSG00000053070	Cfap300	protein_coding	0.000101072	0.00383151	-0.564732	0.14525	5.2364	0.111295	0.00764211	0.0118807	0.0240042	0.0240042	6.31771	5.68892	4.76464	2.64001	3.42483	3.28493
ENSMUST00000026470.5	ENSMUSG00000025403	Shmt2	protein_coding	0.000101073	0.00383151	0.455198	0.117078	9.13589	0.0786101	0.000458395	0.0201023	0.00752412	0.0201023	71.9787	84.2877	103.102	129.001	128.597	142.367
ENSMUST00000172306.2	ENSMUSG00000053716	Dusp7	protein_coding	0.000101571	0.00384731	0.484522	0.124658	7.23276	0.0890759	0.000849764	0.0224597	0.00947211	0.0224597	7.99057	9.7386	9.03565	17.4071	14.1073	11.8575
ENSMUST00000069994.10	ENSMUSG00000056091	St3gal5	protein_coding	0.000102332	0.00387302	-0.366972	0.0944589	6.7227	0.0481635	0.00228806	0.00741554	0.0110957	0.0110957	13.139	12.4515	13.7257	10.0235	9.1135	7.82116
ENSMUST00000066987.13	ENSMUSG00000020520	Galnt10	protein_coding	0.000102445	0.00387422	0.291097	0.0749338	8.51976	0.0321594	0.000202844	0.00821977	0.00750703	0.00821977	21.7146	24.1692	24.3864	34.995	29.1023	29.1769
ENSMUST00000113516.1	ENSMUSG00000062960	Kdr	protein_coding	0.000103272	0.00390234	-0.52099	0.13418	6.03599	0.103034	0.00231803	0.0246883	0.0148559	0.0246883	2.42346	3.26765	2.17074	1.74072	1.4074	1.4127
ENSMUST00000197127.1	ENSMUSG00000104610	Gm567	lncRNA	0.000103402	0.00390281	-1.63691	0.421617	3.36168	0.974856	0.0584616	0.155301	0.20818	0.20818	9.22927	5.34157	5.07685	0.747329	0.924896	2.27582
ENSMUST00000023803.7	ENSMUSG00000023043	Krt18	protein_coding	0.000103449	0.00390281	-0.676844	0.174339	7.07054	0.173908	0.000828396	0.0447625	0.00990449	0.0447625	37.8994	36.8876	28.7656	13.0249	17.3826	22.2437
ENSMUST00000142424.1	ENSMUSG00000032563	Mrpl3	nonsense_mediated_decay	0.000104477	0.00393844	0.312207	0.0804666	7.52974	0.0322714	0.000949304	0.00283751	0.00876302	0.00876302	39.7861	35.1242	37.2691	48.9998	48.5823	52.9531
ENSMUST00000120356.7	ENSMUSG00000001127	Araf	protein_coding	0.000106085	0.00399587	-0.467433	0.120589	6.00361	0.0829982	0.00401883	0.0177939	0.0150528	0.0177939	13.9363	10.5944	10.3998	6.11879	7.5573	7.81075
ENSMUST00000042603.13	ENSMUSG00000041324	Inhba	protein_coding	0.000106677	0.00401495	-0.563393	0.145396	8.94285	0.120592	0.000186368	0.0315237	0.00745524	0.0315237	45.3259	64.6628	45.0323	23.7646	33.0857	29.8834
ENSMUST00000020203.6	ENSMUSG00000020018	Snrpf	protein_coding	0.000106796	0.00401624	0.332513	0.0858185	7.53006	0.0420073	0.000901566	0.0101457	0.00876232	0.0101457	92.7678	85.4064	66.8147	110.157	109.462	111.603
ENSMUST00000172035.7	ENSMUSG00000037275	Gemin5	protein_coding	0.000107139	0.00402594	0.406756	0.105001	7.55019	0.0628655	0.00314751	0.0133904	0.0087191	0.0133904	5.65755	7.66143	7.008	11.1598	9.41273	9.40668
ENSMUST00000140545.1	ENSMUSG00000026411	Tmem9	processed_transcript	0.000108131	0.00405997	4.32557	1.11726	1.46964	5.68147	0.758827	-0.673439	1.11358	1.11358	0	0	0	1.62815	0.922184	2.07307
ENSMUST00000107913.9	ENSMUSG00000028464	Tpm2	protein_coding	0.000108694	0.00407788	-0.374022	0.0966385	7.88652	0.0531745	0.000608419	0.0134001	0.0081133	0.0134001	41.228	38.229	44.6551	32.7874	26.4059	25.5788
ENSMUST00000022213.7	ENSMUSG00000021702	Thbs4	protein_coding	0.000109191	0.00409327	1.29386	0.334399	5.36046	0.63641	0.0089071	0.158827	0.0220293	0.158827	0.628047	0.938254	1.42734	5.13693	3.3232	2.31684
ENSMUST00000149441.7	ENSMUSG00000003199	Mpnd	protein_coding	0.000109306	0.00409435	0.298981	0.077277	7.78657	0.0300222	0.000686431	0.0033203	0.00827117	0.00827117	33.5284	31.1406	31.1677	45.9335	39.2191	43.2073
ENSMUST00000110836.1	ENSMUSG00000018143	Mafk	protein_coding	0.00010986	0.00410206	-0.918642	0.237515	4.57273	0.259639	0.0449517	-0.0368666	0.0396687	0.0396687	1.31377	1.30661	1.22698	0.554339	0.531267	0.434353
ENSMUST00000214357.1	ENSMUSG00000034275	Igsf9b	protein_coding	0.000109831	0.00410206	-0.471103	0.121802	6.46165	0.0843841	0.00222445	0.0200291	0.0124196	0.0200291	1.34488	1.6137	1.10213	0.881475	0.888637	0.718328
ENSMUST00000045374.7	ENSMUSG00000041046	Ramp3	protein_coding	0.000109805	0.00410206	1.01967	0.263627	4.91381	0.395316	0.0452051	0.059044	0.0300267	0.059044	1.40419	1.67762	2.914	6.26231	4.05929	5.5634
ENSMUST00000066819.10	ENSMUSG00000054034	Tceal5	protein_coding	0.000109823	0.00410206	-1.68965	0.436852	3.34254	0.936091	0.07238	0.0271361	0.213879	0.213879	2.34484	1.73176	1.7633	0.460412	0.408659	0.205017
ENSMUST00000028162.4	ENSMUSG00000026820	Ptges2	protein_coding	0.000110166	0.00411001	0.375376	0.0970707	6.90382	0.0535794	0.00116481	0.0129693	0.0104166	0.0129693	4.89801	4.02782	4.07209	6.06296	5.56714	7.11234
ENSMUST00000097952.8	ENSMUSG00000025498	Irf7	protein_coding	0.000110247	0.00411001	4.20657	1.08785	2.46748	6.72869	0.393264	1.38187	0.539051	1.38187	0	0	0.174747	1.10315	2.50894	1.21103
ENSMUST00000040359.5	ENSMUSG00000036412	Arsi	protein_coding	0.00011039	0.0041121	1.22667	0.317253	4.98301	0.572198	0.01044	0.140535	0.0285701	0.140535	0.465182	0.684747	0.916768	3.27562	2.45385	1.42203
ENSMUST00000098350.9	ENSMUSG00000032485	Scap	protein_coding	0.000110918	0.00412503	0.282954	0.0732023	8.23902	0.0255611	0.000342825	0.00158479	0.00769504	0.00769504	19.2249	19.1765	20.113	25.5027	24.7594	26.5715
ENSMUST00000095458.5	ENSMUSG00000071180	Smim15	protein_coding	0.000110999	0.00412503	-0.66963	0.173246	7.28724	0.170538	0.00128998	0.0437312	0.00933592	0.0437312	43.6156	43.2306	34.7181	14.8176	22.6556	24.5325
ENSMUST00000025691.12	ENSMUSG00000024778	Fas	protein_coding	0.000110901	0.00412503	-0.479523	0.124055	5.62694	0.0722147	0.00488581	-0.000845922	0.0181986	0.0181986	9.075	8.16622	7.74049	4.86782	5.21932	5.07702
ENSMUST00000041730.10	ENSMUSG00000038765	Lmx1b	protein_coding	0.000111856	0.00415362	0.644139	0.166732	4.88243	0.15411	0.0109705	0.0260737	0.0307288	0.0307288	0.383985	0.586804	0.53301	1.09709	0.817214	0.901172
ENSMUST00000072406.4	ENSMUSG00000024127	Prepl	protein_coding	0.000111956	0.00415409	-0.337519	0.08737	7.02627	0.0358437	0.00141794	0.000666935	0.0100323	0.0100323	12.3788	12.7509	12.0098	8.13017	8.83338	9.20706
ENSMUST00000077353.14	ENSMUSG00000032126	Hmbs	protein_coding	0.000112317	0.00416418	0.349458	0.0904788	7.44248	0.0464599	0.000716531	0.0115631	0.00896006	0.0115631	30.3211	25.5564	22.459	37.2709	33.5332	38.3063
ENSMUST00000018246.5	ENSMUSG00000018102	H2bc4	protein_coding	0.000113203	0.00419373	-0.500254	0.129586	7.91387	0.0952274	0.000367123	0.0248217	0.00807324	0.0248217	145.373	106.373	93.957	63.7181	65.6581	74.4265
ENSMUST00000038075.11	ENSMUSG00000041625	Ggact	protein_coding	0.000113387	0.00419727	-0.456494	0.118263	5.75189	0.06852	0.00406265	0.00344237	0.0169164	0.0169164	12.8301	12.2974	11.6511	8.45156	7.88858	6.70328
ENSMUST00000053540.10	ENSMUSG00000046432	Bex3	protein_coding	0.000113895	0.00421279	-0.748535	0.193976	7.97218	0.213243	0.00238794	0.054052	0.00799219	0.054052	207.579	141.756	107.276	61.474	66.0783	79.2888
ENSMUST00000231066.1	ENSMUSG00000022992	Kansl2	nonsense_mediated_decay	0.000115427	0.00426612	0.364221	0.0944644	7.08791	0.0505053	0.00222933	0.011156	0.0098557	0.011156	15.9249	13.0824	16.6527	23.5815	20.5139	20.4838
ENSMUST00000055688.9	ENSMUSG00000047777	Phf13	protein_coding	0.000116166	0.00429007	0.333066	0.086419	7.0589	0.0383422	0.00126477	0.00506313	0.00993761	0.00993761	8.87143	8.46621	7.77912	12.9371	11.111	10.6652
ENSMUST00000197662.4	ENSMUSG00000028127	Abcd3	nonsense_mediated_decay	0.000116859	0.00431227	-4.9729	1.29078	2.22572	7.67385	1.83792	-1.51926	0.661257	0.661257	1.44954	1.19109	2.01863	0	0	0.017809
ENSMUST00000028795.9	ENSMUSG00000027323	Rad51	protein_coding	0.000117032	0.00431528	0.355373	0.0922505	6.85941	0.0410083	0.00219592	0.00170565	0.0105693	0.0105693	7.27551	6.9613	7.72901	10.6687	10.6228	9.54306
ENSMUST00000167525.2	ENSMUSG00000063253	Scoc	protein_coding	0.000117208	0.00431843	-0.682273	0.177127	6.54125	0.168118	0.0350987	0.000487865	0.0119622	0.0119622	17.2771	26.1891	23.8587	9.04373	12.8588	11.2705
ENSMUST00000145271.1	ENSMUSG00000027374	Mrps5	retained_intron	0.000118156	0.00434786	0.433613	0.112629	6.02905	0.0602288	0.00413042	0.000647866	0.0148976	0.0148976	15.8622	16.99	17.5327	23.851	25.7894	26.7803
ENSMUST00000156261.1	ENSMUSG00000030861	Acadsb	retained_intron	0.000118283	0.00434786	-0.387187	0.100577	6.32505	0.0533748	0.00194526	0.00855557	0.0132283	0.0132283	9.00524	8.45877	7.5151	4.86263	6.03537	5.79393
ENSMUST00000022119.5	ENSMUSG00000021619	Atg10	protein_coding	0.000118228	0.00434786	-0.794471	0.206368	4.59722	0.209272	0.0250912	-0.000195437	0.0387907	0.0387907	3.65141	3.29772	3.19477	1.19208	1.55126	1.81764
ENSMUST00000030702.13	ENSMUSG00000028882	Ppp1r8	protein_coding	0.000119357	0.00438306	0.302626	0.0786564	7.70294	0.0316039	0.000862862	0.00429863	0.00841737	0.00841737	27.1642	24.539	28.0806	37.5855	34.2371	35.1887
ENSMUST00000034723.5	ENSMUSG00000013584	Aldh1a2	protein_coding	0.000119427	0.00438306	-0.597342	0.155263	5.96887	0.135973	0.00237464	0.0337851	0.0152717	0.0337851	7.51316	7.49579	5.53565	2.9057	4.49295	3.83868
ENSMUST00000024709.8	ENSMUSG00000061665	Cd2ap	protein_coding	0.000121345	0.00445	-0.447659	0.116475	6.18542	0.0763993	0.00478422	0.0155654	0.0140042	0.0155654	3.55354	4.33861	3.74865	2.14087	3.02521	2.23048
ENSMUST00000009157.3	ENSMUSG00000009013	Dynll1	protein_coding	0.000121945	0.00446727	-0.290036	0.0754873	8.12274	0.0295329	0.00073756	0.00463323	0.00780993	0.00780993	63.7622	54.8603	62.4333	43.5233	43.5141	46.0692
ENSMUST00000018653.7	ENSMUSG00000018509	Cenpv	protein_coding	0.000122005	0.00446727	0.583436	0.151855	5.23014	0.115033	0.0104829	0.00565987	0.024107	0.024107	4.82837	3.48854	3.6429	7.16039	6.45262	7.39256
ENSMUST00000171366.6	ENSMUSG00000030768	Disp1	protein_coding	0.000122209	0.00447089	-0.496612	0.12927	6.74886	0.0927016	0.0140786	0.00931478	0.0109876	0.0109876	6.43255	5.59849	6.12021	4.33274	3.80662	2.90724
ENSMUST00000042661.7	ENSMUSG00000036565	Ttyh3	protein_coding	0.000122293	0.00447089	0.331928	0.0864061	8.7427	0.042012	0.000234591	0.0109644	0.0074453	0.0109644	24.4926	28.6867	28.1361	42.2701	34.2767	35.9657
ENSMUST00000094312.11	ENSMUSG00000070509	Rgma	protein_coding	0.000122511	0.00447541	4.212	1.09658	2.30181	6.36379	1.18237	0.119495	0.621349	0.621349	0	0	0.0450926	0.323011	0.828356	0.651786
ENSMUST00000025506.6	ENSMUSG00000024604	Rbm22	protein_coding	0.000123747	0.00451706	0.288073	0.0750468	7.9597	0.0280209	0.000439005	0.00346729	0.00800903	0.00800903	31.568	34.1031	35.7454	46.7096	43.4847	43.3603
ENSMUST00000114795.2	ENSMUSG00000026072	Il1r1	protein_coding	0.000124069	0.00452469	0.636376	0.165812	6.33073	0.154485	0.00347512	0.0377652	0.0131961	0.0377652	2.02609	3.01127	2.72992	5.09763	5.63553	3.75553
ENSMUST00000059844.12	ENSMUSG00000023973	Cnpy3	protein_coding	0.000124148	0.00452469	0.326899	0.0851791	7.28874	0.0407655	0.000785358	0.0100979	0.00933221	0.0100979	15.8702	17.0597	19.0137	26.3105	23.2008	21.8687
ENSMUST00000102647.9	ENSMUSG00000076437	Selenoh	protein_coding	0.000124998	0.00455218	0.578448	0.15079	6.05784	0.127666	0.0160038	0.0181028	0.0147263	0.0181028	17.5321	17.6811	20.6294	41.7831	31.6448	25.9607
ENSMUST00000037290.11	ENSMUSG00000040354	Mars	protein_coding	0.000126175	0.00459148	0.273774	0.0714106	8.89723	0.0242457	0.000201699	0.00199821	0.00744751	0.00744751	57.8155	57.8819	61.5876	80.1489	74.6245	75.4831
ENSMUST00000025357.8	ENSMUSG00000024480	Ap3s1	protein_coding	0.000126492	0.00459946	-0.344587	0.0898957	7.50986	0.0453196	0.00110681	0.011015	0.00880652	0.011015	54.2773	59.8544	49.0797	32.8324	39.0851	42.1179
ENSMUST00000010298.6	ENSMUSG00000010154	Spire2	protein_coding	0.000127209	0.00461883	0.942094	0.245862	4.75661	0.301905	0.0568096	-0.0122555	0.0338625	0.0338625	0.844615	0.99441	0.559743	2.27287	1.93829	1.77503
ENSMUST00000172235.1	ENSMUSG00000070327	Rnf213	protein_coding	0.00012722	0.00461883	2.1091	0.550423	4.90981	1.69805	0.210588	0.24386	0.0301148	0.24386	0.348259	0.529802	1.16713	8.32695	6.68092	2.12386
ENSMUST00000093217.8	ENSMUSG00000069920	B3gnt9	protein_coding	0.000127343	0.00461977	0.589786	0.153929	6.03468	0.132787	0.011615	0.0239263	0.0148638	0.0239263	3.14862	3.90568	4.0182	8.28828	6.39212	5.29703
ENSMUST00000020343.8	ENSMUSG00000020132	Rab21	protein_coding	0.000127507	0.00462216	-0.290863	0.0759192	7.88633	0.0298738	0.000532001	0.00508472	0.00811358	0.00811358	23.1081	22.6555	19.8315	14.7706	16.593	16.931
ENSMUST00000035612.6	ENSMUSG00000033712	Ccar2	protein_coding	0.000128212	0.00464413	0.310017	0.0809472	7.52853	0.0366962	0.000690306	0.00913838	0.00876564	0.00913838	11.5522	10.0808	11.821	16.7738	14.2293	14.1721
ENSMUST00000030980.11	ENSMUSG00000029097	Trmt44	protein_coding	0.000128351	0.00464561	0.41985	0.109633	6.06049	0.0580127	0.00331823	0.0030948	0.0147108	0.0147108	2.70043	2.22925	2.40152	3.80997	3.48964	3.69709
ENSMUST00000002840.8	ENSMUSG00000002763	Pex6	protein_coding	0.000128576	0.00465019	0.297116	0.0775929	7.67399	0.0313621	0.000559907	0.00553841	0.00847107	0.00847107	14.8548	13.9475	13.7922	20.4117	16.8475	19.5896
ENSMUST00000050952.3	ENSMUSG00000047963	Stbd1	protein_coding	0.000128918	0.00465899	-0.336578	0.0879135	7.03939	0.0432601	0.00111563	0.0104776	0.00999391	0.0104776	23.1105	18.8773	18.0747	12.8052	14.2717	15.0412
ENSMUST00000208222.1	ENSMUSG00000032009	Sesn3	protein_coding	0.000129478	0.00467565	-0.412385	0.107744	6.0959	0.0649489	0.00240933	0.0150038	0.0145058	0.0150038	1.6215	2.16998	1.67958	1.07918	1.35867	1.11882
ENSMUST00000014957.9	ENSMUSG00000014813	Stc1	protein_coding	0.000130456	0.00470738	0.690657	0.180536	4.6808	0.174773	0.0128392	0.0267501	0.0360505	0.0360505	0.442791	0.778181	0.560822	1.07987	1.25938	1.0958
ENSMUST00000045693.7	ENSMUSG00000033706	Smyd5	protein_coding	0.00013076	0.00471115	0.291447	0.0761948	8.32318	0.0324491	0.000314363	0.0083941	0.00762558	0.0083941	38.5694	35.3386	40.9403	50.0091	46.4979	55.742
ENSMUST00000020679.2	ENSMUSG00000020411	Nipal4	protein_coding	0.000130717	0.00471115	-0.401777	0.105037	6.10252	0.0508033	0.00208112	0.000888546	0.014468	0.014468	4.62634	4.48407	4.14165	2.89104	2.77381	3.11073
ENSMUST00000150046.1	ENSMUSG00000025283	Sat1	retained_intron	0.000131084	0.00471924	-1.08142	0.282767	4.24206	0.446787	0.0583685	0.0615671	0.0562645	0.0615671	3.8551	3.56155	2.2902	0.661611	1.14987	1.51197
ENSMUST00000117557.7	ENSMUSG00000015656	Hspa8	protein_coding	0.000131295	0.00472322	0.351917	0.0920281	10.9371	0.0462205	0.000940353	0.0103932	0.0117634	0.0117634	685.593	684.64	847.869	1100.75	979.175	1023.28
ENSMUST00000161308.7	ENSMUSG00000060743	H3f3a	protein_coding	0.000131423	0.00472422	-0.312513	0.0817289	7.44896	0.0356717	0.00107454	0.00689099	0.00894487	0.00894487	25.423	23.6842	22.1249	15.3175	17.1727	18.834
ENSMUST00000179569.2	ENSMUSG00000096255	Dynlt1b	protein_coding	0.000131976	0.00474049	-0.380842	0.0996252	7.67973	0.0554223	0.00076791	0.0141199	0.0084603	0.0141199	123.797	106.257	129.312	82.1535	70.2108	88.2677
ENSMUST00000063249.8	ENSMUSG00000051768	Xrcc1	protein_coding	0.000134413	0.00482194	0.334393	0.0875779	7.78482	0.0427494	0.000580832	0.010924	0.00827409	0.010924	23.3899	22.4563	27.1215	37.0788	31.5664	32.1727
ENSMUST00000032843.8	ENSMUSG00000030614	Tmem126b	protein_coding	0.000134447	0.00482194	-0.58685	0.153699	5.99434	0.131666	0.00298586	0.0324494	0.0151104	0.0324494	8.73971	7.51471	6.88223	3.18127	4.89231	4.76551
ENSMUST00000031017.10	ENSMUSG00000029135	Fosl2	protein_coding	0.000135794	0.00486654	0.280869	0.0736086	8.18972	0.0290908	0.000386284	0.00639446	0.00774105	0.00774105	12.0616	13.8233	11.9469	17.8093	16.9757	14.8683
ENSMUST00000133181.1	ENSMUSG00000024370	Cdc23	protein_coding	0.00013615	0.0048719	0.299972	0.0786285	7.94748	0.0279645	0.00124787	-3.59994e-05	0.00802579	0.00802579	18.1438	17.0715	18.0031	23.0644	23.9323	23.7634
ENSMUST00000033751.7	ENSMUSG00000031380	Vegfd	protein_coding	0.000136054	0.0048719	1.03616	0.271584	6.07432	0.410596	0.00410279	0.106534	0.0146302	0.106534	3.0705	3.99437	5.11902	14.6954	13.0235	7.07013
ENSMUST00000054607.15	ENSMUSG00000027597	Ahcy	protein_coding	0.000136278	0.00487278	0.280219	0.0734553	9.6105	0.0300316	7.47559e-05	0.00801876	0.00795471	0.00801876	149.083	134.061	151.635	190.892	171.386	205.811
ENSMUST00000038434.3	ENSMUSG00000036114	Rpp25l	protein_coding	0.000136629	0.00488163	0.373249	0.097858	6.44779	0.053286	0.00151499	0.0128493	0.0125048	0.0128493	21.5747	16.5582	18.6975	29.4301	23.8846	28.0562
ENSMUST00000115487.2	ENSMUSG00000010205	Raver1	protein_coding	0.000137144	0.00489633	0.313923	0.082324	8.51024	0.037697	0.000248003	0.00991786	0.00751138	0.00991786	27.3397	31.9377	34.4971	43.2537	40.0625	43.0605
ENSMUST00000212349.1	ENSMUSG00000031955	Bcar1	protein_coding	0.000137345	0.00489982	-0.370638	0.0972062	8.63729	0.0525506	0.00236381	0.0118098	0.00746493	0.0118098	53.8484	48.2003	61.2444	40.4469	33.8405	37.0535
ENSMUST00000026989.14	ENSMUSG00000025871	4833439L19Rik	protein_coding	0.000137485	0.00490109	-0.314742	0.082552	7.76248	0.0322547	0.00191031	0.00125955	0.00831195	0.00831195	27.8734	29.5671	30.655	22.3858	20.2975	20.7558
ENSMUST00000110463.7	ENSMUSG00000027206	Cops2	protein_coding	0.000140591	0.00500483	-0.636746	0.167251	6.86743	0.155201	0.00360386	0.0383555	0.0105412	0.0383555	14.0267	13.2309	14.6575	5.28792	7.83117	9.20999
ENSMUST00000095795.4	ENSMUSG00000078452	Raet1d	protein_coding	0.000140713	0.00500483	0.455774	0.119723	5.99371	0.0795192	0.00428986	0.0172104	0.0151143	0.0172104	8.89709	7.99917	10.0898	11.5452	15.3452	15.2892
ENSMUST00000218713.1	ENSMUSG00000090841	Myl6	processed_transcript	0.000140626	0.00500483	-1.26563	0.332442	4.05715	0.613166	0.0729098	0.0928668	0.0718553	0.0928668	19.2299	8.65391	16.5767	2.49263	5.38372	4.2969
ENSMUST00000110708.3	ENSMUSG00000112449	Srp54b	protein_coding	0.000142519	0.00506526	-0.486769	0.127971	6.91747	0.0907349	0.00819137	0.0163733	0.0103712	0.0163733	12.51	11.0754	11.1576	5.50197	7.84598	7.98423
ENSMUST00000220509.1	ENSMUSG00000017843	Ppp2r5c	protein_coding	0.000142651	0.00506617	-0.50979	0.134031	5.5482	0.0875055	0.00775428	0.00417063	0.0191921	0.0191921	12.2533	13.4015	11.2301	6.18656	7.97558	7.77824
ENSMUST00000039818.9	ENSMUSG00000028737	Aldh4a1	protein_coding	0.000143841	0.00510456	-0.284329	0.0747946	7.98081	0.0305018	0.000410654	0.00740035	0.00798069	0.00798069	28.6282	23.7936	23.7599	19.7507	17.4659	19.4382
ENSMUST00000107152.8	ENSMUSG00000008855	Hdac5	protein_coding	0.000144308	0.00511731	0.505745	0.133068	6.98933	0.0905566	0.0164173	0.000861631	0.0101432	0.0101432	4.64253	5.58632	5.96325	9.57871	7.71531	9.32517
ENSMUST00000027050.9	ENSMUSG00000025917	Cops5	protein_coding	0.00014455	0.00512204	-0.336811	0.0886287	7.87723	0.0434586	0.00103449	0.0107481	0.00812721	0.0107481	62.58	57.9939	60.0721	35.6698	46.4462	45.5126
ENSMUST00000106386.7	ENSMUSG00000061878	Sphk1	protein_coding	0.000146009	0.00516985	-0.607648	0.160002	5.81906	0.141492	0.0188386	0.0195622	0.0163435	0.0195622	6.21421	7.36323	6.11754	3.38759	2.7847	4.64576
ENSMUST00000049400.14	ENSMUSG00000032702	Kank1	protein_coding	0.00014668	0.00518972	-0.352526	0.0928525	6.82033	0.0476283	0.00198934	0.010943	0.0107106	0.010943	5.39744	5.72593	4.37133	4.00699	3.44753	3.28732
ENSMUST00000026469.8	ENSMUSG00000025402	Nab2	protein_coding	0.00014724	0.00520565	0.373673	0.098447	7.73956	0.0535197	0.00189358	0.0126441	0.00835174	0.0126441	19.2182	21.2671	15.3773	29.4202	26.5791	24.1799
ENSMUST00000087629.9	ENSMUSG00000029096	Htra3	protein_coding	0.000147399	0.00520737	0.65604	0.172851	5.1768	0.164969	0.00771028	0.0371058	0.0249977	0.0371058	1.07602	1.09769	1.35815	2.79671	2.38249	1.67359
ENSMUST00000020188.12	ENSMUSG00000020009	Ifngr1	protein_coding	0.000147932	0.00522229	0.371053	0.0977866	6.46071	0.0513548	0.00191802	0.0106454	0.0124253	0.0124253	7.30596	7.82994	7.92666	12.5489	11.3215	9.2914
ENSMUST00000089497.6	ENSMUSG00000030056	Isy1	protein_coding	0.000148215	0.00522444	0.346954	0.091447	6.74319	0.0377497	0.00153311	0.000512754	0.0110107	0.0110107	3.28913	3.47013	3.67756	4.90386	4.89295	4.76389
ENSMUST00000034326.6	ENSMUSG00000031862	Atp13a1	protein_coding	0.000148309	0.00522444	0.285744	0.075317	7.89954	0.0285632	0.000414926	0.0046705	0.00809405	0.00809405	15.0784	15.762	15.0086	22.1874	18.3217	19.9991
ENSMUST00000060895.5	ENSMUSG00000001891	Ugp2	protein_coding	0.000148325	0.00522444	-0.486453	0.128221	6.84639	0.0907197	0.00373543	0.0209256	0.0106156	0.0209256	23.8193	20.3578	19.1096	10.1906	14.6365	13.7019
ENSMUST00000026672.7	ENSMUSG00000025584	Pde8a	protein_coding	0.000148753	0.00523562	0.733854	0.193469	5.72462	0.206479	0.00493206	0.0512131	0.0171701	0.0512131	1.15423	1.86133	2.01025	3.76591	3.56059	2.81069
ENSMUST00000023568.13	ENSMUSG00000022860	Chodl	protein_coding	0.000149587	0.00526105	-1.49825	0.395133	3.45917	0.71726	0.0535152	0.00127887	0.18068	0.18068	0.961299	0.963843	0.745432	0.131745	0.23545	0.218524
ENSMUST00000030128.5	ENSMUSG00000028419	Chmp5	protein_coding	0.000150214	0.00527526	-0.546106	0.144064	7.62421	0.114375	0.000473076	0.0306587	0.00856718	0.0306587	63.9479	60.0255	62.3232	26.525	40.9087	40.8285
ENSMUST00000093393.4	ENSMUSG00000031709	Tbc1d9	protein_coding	0.000150154	0.00527526	-0.464887	0.122635	5.73061	0.0738947	0.00544585	0.00587762	0.0171132	0.0171132	1.85458	2.31084	1.79529	1.31013	1.11576	1.261
ENSMUST00000005057.6	ENSMUSG00000004929	Thop1	protein_coding	0.000150889	0.00529501	0.272965	0.0720299	8.50266	0.0266419	0.000267521	0.00509371	0.00751494	0.00751494	38.219	36.5262	38.7788	50.6508	44.589	52.6583
ENSMUST00000029142.14	ENSMUSG00000027613	Eif6	protein_coding	0.00015102	0.00529566	0.293217	0.0773784	9.23864	0.0329778	0.000109296	0.00887184	0.0075851	0.00887184	170.261	154.782	162.229	211.411	193.514	244.387
ENSMUST00000025931.13	ENSMUSG00000024975	Pdcd4	protein_coding	0.000151688	0.00531517	-0.735939	0.194267	5.5686	0.207769	0.0251027	0.0315067	0.0189186	0.0315067	6.57077	5.92529	3.69189	2.21625	2.96868	2.30293
ENSMUST00000079391.9	ENSMUSG00000029761	Cald1	protein_coding	0.000153969	0.00539108	-0.55076	0.145527	7.86779	0.116415	0.00959843	0.0221689	0.00814151	0.0221689	27.3251	26.9411	24.7083	11.3155	16.1646	18.2776
ENSMUST00000123491.7	ENSMUSG00000042523	Dnal1	protein_coding	0.000154331	0.00539974	-0.436193	0.115273	5.83185	0.0693587	0.00368992	0.0116593	0.0162419	0.0162419	2.26272	2.11774	2.29545	1.17215	1.63122	1.49055
ENSMUST00000005493.13	ENSMUSG00000005360	Slc1a3	protein_coding	0.000156282	0.00546396	0.880324	0.232836	5.00826	0.297547	0.0136395	0.0676798	0.0280663	0.0676798	0.485088	0.818597	0.774248	2.13978	1.62603	1.21089
ENSMUST00000110698.8	ENSMUSG00000055737	Ghr	protein_coding	0.000156982	0.00548032	-0.52085	0.1378	6.3771	0.104172	0.00328407	0.0251992	0.012929	0.0251992	24.6335	22.7226	21.1167	10.8777	12.7341	16.8695
ENSMUST00000025850.6	ENSMUSG00000024912	Fosl1	protein_coding	0.000156886	0.00548032	0.456591	0.120794	7.45871	0.080052	0.000913536	0.0209733	0.0089222	0.0209733	16.1058	21.5458	22.7562	33.5334	29.6172	30.4043
ENSMUST00000040002.3	ENSMUSG00000037086	Prr32	protein_coding	0.000157364	0.00548961	-1.36681	0.361672	3.55702	0.635865	0.0403889	0.0538746	0.155821	0.155821	3.17923	1.52667	1.91008	0.611226	0.569345	0.396996
ENSMUST00000095012.9	ENSMUSG00000028883	Sema3a	protein_coding	0.000158223	0.0055155	-0.507468	0.134329	5.76866	0.0803811	0.0102997	-0.00639465	0.0167668	0.0167668	3.11176	3.40971	3.18525	1.75299	1.95703	2.05466
ENSMUST00000239199.1	ENSMUSG00000074813	Morrbid	lncRNA	0.000159332	0.00555007	-0.960417	0.254344	4.90413	0.319532	0.066796	-0.0132821	0.0302404	0.0302404	9.16691	5.09885	6.26858	2.09891	2.7455	2.68231
ENSMUST00000214644.1	ENSMUSG00000000296	Tpd52l1	protein_coding	0.000160223	0.00557699	-0.881928	0.233644	4.93316	0.298847	0.0192615	0.0626228	0.0296074	0.0626228	7.69609	5.17048	6.5956	1.76495	3.07861	3.27478
ENSMUST00000052281.5	ENSMUSG00000043439	Epop	protein_coding	0.000160608	0.00558628	0.530952	0.140684	5.87735	0.108324	0.00365732	0.0260308	0.0158975	0.0260308	3.76075	2.88512	2.24416	4.83731	4.54758	5.32778
ENSMUST00000019749.3	ENSMUSG00000027102	Hoxd8	protein_coding	0.000160961	0.00559445	0.668963	0.177278	4.85489	0.167964	0.0157724	0.0263662	0.0313689	0.0313689	0.836085	1.09985	1.07221	2.39768	2.05032	1.46756
ENSMUST00000125447.2	ENSMUSG00000028649	Macf1	protein_coding	0.000161205	0.0055988	-0.683386	0.181119	6.30429	0.17947	0.00265624	0.0465498	0.0133454	0.0465498	2.97654	5.19495	3.97191	1.71114	2.34598	1.88015
ENSMUST00000172818.7	ENSMUSG00000024083	Pja2	protein_coding	0.000161781	0.00561468	-0.53955	0.143031	7.70034	0.111884	0.0167855	0.0139014	0.00842213	0.0139014	19.1959	19.6349	20.1608	9.00911	14.8537	10.732
ENSMUST00000018841.2	ENSMUSG00000018697	Aatf	protein_coding	0.000162524	0.00563632	0.316138	0.0838316	7.23551	0.0339408	0.00107642	0.00387088	0.00946517	0.00946517	18.1779	20.6417	20.2196	28.8235	25.6761	25.3583
ENSMUST00000060417.10	ENSMUSG00000044328	Trp53i13	protein_coding	0.000163868	0.00567874	0.416632	0.11054	5.96622	0.0601822	0.00303993	0.00709454	0.0152888	0.0152888	6.43749	5.22637	4.98483	8.82132	7.63708	8.46428
ENSMUST00000101208.5	ENSMUSG00000072941	Sod3	protein_coding	0.000164014	0.00567966	1.34993	0.358183	5.46723	0.70065	0.00727978	0.185163	0.0203874	0.185163	0.592919	0.917976	1.22239	4.97225	3.90538	1.91075
ENSMUST00000030901.8	ENSMUSG00000029034	Ints11	protein_coding	0.000164211	0.00568231	0.280716	0.0744895	8.01835	0.0248157	0.000390837	0.0010782	0.0079322	0.0079322	31.6069	30.7082	31.4936	42.1656	38.9743	41.3825
ENSMUST00000150412.3	ENSMUSG00000089945	Pakap	protein_coding	0.000164385	0.00568415	-0.53211	0.141208	6.9913	0.10887	0.00937183	0.0205378	0.0101371	0.0205378	7.33231	7.80441	8.00073	3.49192	4.56102	5.63123
ENSMUST00000105964.1	ENSMUSG00000028901	Gmeb1	protein_coding	0.000165557	0.0057205	0.496854	0.131914	5.86014	0.0909374	0.0100773	0.0110202	0.0160248	0.0160248	3.83624	3.72082	4.58655	7.79786	6.02658	5.94675
ENSMUST00000211570.1	ENSMUSG00000058325	Dock1	retained_intron	0.00016625	0.00574024	-0.790417	0.209913	4.95129	0.240304	0.0361249	0.0299704	0.0292232	0.0299704	1.86999	1.71701	1.61265	0.520533	1.06671	0.825828
ENSMUST00000168574.8	ENSMUSG00000045658	Pid1	protein_coding	0.000166456	0.00574315	-0.371876	0.0987682	6.43195	0.0507878	0.00203082	0.00959439	0.0126019	0.0126019	8.73022	9.32832	8.14551	6.18121	6.68331	5.02514
ENSMUST00000113853.2	ENSMUSG00000026806	Ddx31	protein_coding	0.000166858	0.00575282	0.368382	0.0978559	6.45649	0.044958	0.00191254	0.00339534	0.0124511	0.0124511	4.3375	4.5874	4.94152	6.83568	6.11012	6.76061
ENSMUST00000031822.12	ENSMUSG00000029802	Abcg2	protein_coding	0.000170338	0.00586854	-0.52962	0.14088	5.44114	0.107622	0.00898486	0.0203565	0.0207858	0.0207858	1.49834	1.97979	1.79034	0.811981	1.24418	1.02019
ENSMUST00000151346.7	ENSMUSG00000028649	Macf1	protein_coding	0.000171591	0.00590738	-0.602316	0.160295	7.12715	0.139669	0.00568521	0.0328566	0.00974791	0.0328566	2.10382	3.62594	2.79499	1.40769	1.67667	1.41353
ENSMUST00000030185.4	ENSMUSG00000032366	Tpm1	protein_coding	0.000172155	0.00592248	-0.319021	0.0849202	7.36647	0.0317366	0.0016747	-0.000169383	0.00914245	0.00914245	32.3744	31.594	32.579	22.8043	22.1551	24.0074
ENSMUST00000028803.13	ENSMUSG00000027331	Knstrn	protein_coding	0.000172834	0.00594153	0.438942	0.116873	5.97044	0.0692158	0.00522717	0.00904119	0.0152616	0.0152616	8.62696	7.23689	8.69365	13.9509	12.6416	10.8752
ENSMUST00000213607.1	ENSMUSG00000001349	Cnn1	protein_coding	0.000174267	0.00598642	-0.704283	0.187625	5.19938	0.191048	0.0225122	0.0302927	0.0246171	0.0302927	49.0766	28.8307	31.556	13.4099	17.1038	20.8633
ENSMUST00000056403.6	ENSMUSG00000044927	H1f10	protein_coding	0.000174513	0.00599052	0.502662	0.133925	6.84433	0.0973236	0.0012854	0.0256184	0.0106231	0.0256184	18.5631	18.6093	12.8419	29.9209	23.3782	28.4096
ENSMUST00000023283.5	ENSMUSG00000022614	Lmf2	protein_coding	0.000175405	0.00601677	0.327688	0.0873362	7.83902	0.0370629	0.00325535	0.00280585	0.00818607	0.00818607	17.2693	19.6198	19.6615	28.0464	25.499	24.2381
ENSMUST00000105098.5	ENSMUSG00000078302	Foxd1	protein_coding	0.000176599	0.0060533	-0.488416	0.130233	5.42194	0.0847257	0.00436074	0.01209	0.0210801	0.0210801	1.84018	1.69373	1.30477	1.02819	1.00941	0.878192
ENSMUST00000094427.6	ENSMUSG00000041638	Gcn1	processed_transcript	0.000178648	0.00611467	0.666932	0.17797	6.85661	0.171448	0.0103064	0.0372037	0.0105792	0.0372037	4.15257	4.68156	4.41325	11.9699	7.55594	6.77923
ENSMUST00000221317.1	ENSMUSG00000034574	Daam1	protein_coding	0.000178543	0.00611467	-0.448103	0.119571	6.55839	0.0753483	0.00957536	0.0093114	0.0118705	0.0118705	4.14002	5.20252	4.29781	2.41991	3.38108	2.81693
ENSMUST00000004507.10	ENSMUSG00000004393	Ddx56	protein_coding	0.000178872	0.00611791	0.274895	0.0733617	8.24673	0.0260027	0.000384699	0.00378092	0.0076882	0.0076882	45.6952	47.2266	50.3158	63.4056	57.6464	64.6816
ENSMUST00000020776.4	ENSMUSG00000020482	Ccdc117	protein_coding	0.000179497	0.00613485	0.397516	0.10611	6.06766	0.0550431	0.00222026	0.00732646	0.0146689	0.0146689	2.85527	3.76357	3.06753	4.86627	4.78676	4.46887
ENSMUST00000001181.12	ENSMUSG00000020241	Col6a2	protein_coding	0.000179796	0.0061362	1.29258	0.345071	8.73011	0.644116	0.000278084	0.178333	0.00744674	0.178333	12.3671	22.0629	28.8224	105.969	72.4252	48.3227
ENSMUST00000023630.15	ENSMUSG00000022913	Psmg1	protein_coding	0.000179694	0.0061362	0.312658	0.0834651	7.21581	0.0336343	0.000934414	0.00445024	0.00951522	0.00951522	37.5508	32.9941	38.7016	48.7732	48.1198	49.9353
ENSMUST00000163279.5	ENSMUSG00000037062	Sh3glb1	protein_coding	0.00018391	0.00627207	-0.357718	0.0956425	7.84149	0.0493655	0.0013222	0.012399	0.00818219	0.012399	24.5337	26.1845	24.6234	14.2337	19.0352	19.0936
ENSMUST00000072961.5	ENSMUSG00000041236	Vps41	protein_coding	0.000184235	0.0062786	-0.607918	0.162558	7.54984	0.142579	0.00063717	0.0390003	0.00871983	0.0390003	24.2346	25.5465	24.4908	9.57585	15.4625	15.8429
ENSMUST00000092623.4	ENSMUSG00000019880	Rspo3	protein_coding	0.000184513	0.00628355	-0.508911	0.136097	5.31099	0.0941344	0.00497865	0.0155678	0.0228049	0.0228049	3.23845	2.75355	2.35228	1.44181	1.88587	1.59006
ENSMUST00000040213.12	ENSMUSG00000056310	Tyw1	protein_coding	0.00018498	0.00629492	0.336261	0.0899407	6.90668	0.0392916	0.00172695	0.00498581	0.0104071	0.0104071	7.31356	7.71981	7.86794	11.9006	9.95974	9.88186
ENSMUST00000007799.12	ENSMUSG00000007655	Cav1	protein_coding	0.000185212	0.00629829	-0.385476	0.103113	9.72814	0.0573363	0.000167132	0.0157814	0.00812339	0.0157814	285.934	264.457	271.126	150.97	214.041	190.998
ENSMUST00000027384.5	ENSMUSG00000026192	Atic	protein_coding	0.000186027	0.00632144	0.269488	0.0721081	9.37179	0.0249433	0.000109352	0.00383596	0.00769002	0.00769002	102.693	102.167	109.264	140.858	125.348	140.212
ENSMUST00000110711.8	ENSMUSG00000027287	Snap23	protein_coding	0.000186693	0.0063395	-0.587856	0.157333	7.04152	0.133377	0.00403151	0.0330991	0.00998771	0.0330991	19.8526	19.2003	18.6573	7.73825	13.1294	11.4175
ENSMUST00000230114.1	ENSMUSG00000056851	Pcbp2	protein_coding	0.000186862	0.00634068	0.341125	0.091304	7.30922	0.0449136	0.00319948	0.00930516	0.0092818	0.00930516	34.5712	33.6419	43.1341	50.861	51.5921	51.3298
ENSMUST00000070653.12	ENSMUSG00000025161	Slc16a3	protein_coding	0.000187689	0.00636416	0.635008	0.170014	6.57523	0.155656	0.00819168	0.0351654	0.0117825	0.0351654	4.45271	6.27822	7.42645	11.7464	10.0064	11.6323
ENSMUST00000060148.5	ENSMUSG00000021366	Hivep1	protein_coding	0.000190139	0.00644262	-0.452275	0.121196	6.15893	0.078992	0.00226095	0.0197717	0.014151	0.0197717	1.62654	2.2115	1.67302	1.22799	1.25306	0.971642
ENSMUST00000035651.5	ENSMUSG00000039883	Lrrc17	protein_coding	0.000190417	0.00644741	0.521672	0.139806	7.98326	0.105097	0.000406897	0.0289116	0.00797745	0.0289116	26.349	30.626	38.783	59.1933	53.3578	45.4224
ENSMUST00000054048.9	ENSMUSG00000048965	Mrgpre	protein_coding	0.00019062	0.00644967	-0.66129	0.177236	4.69478	0.142957	0.0114915	0.00321573	0.0356272	0.0356272	1.2034	0.881513	1.08372	0.554565	0.533058	0.515133
ENSMUST00000025276.14	ENSMUSG00000024410	Rmc1	protein_coding	0.0001913	0.00646804	-0.330394	0.088572	6.9419	0.0362688	0.00147579	0.00292503	0.0102917	0.0102917	17.1585	17.2808	15.8334	11.1488	11.5603	13.0363
ENSMUST00000113307.8	ENSMUSG00000026819	Slc25a25	protein_coding	0.000191637	0.00647449	-0.526366	0.141125	5.89692	0.0984682	0.0141175	0.00506998	0.0157567	0.0157567	5.03015	4.81357	5.24252	2.38219	3.09525	3.40155
ENSMUST00000110036.10	ENSMUSG00000022607	Ptk2	protein_coding	0.000191765	0.00647449	-0.283713	0.0760701	7.98799	0.0297152	0.00070876	0.00625038	0.00797124	0.00797124	22.8696	23.2375	22.4681	15.062	16.9208	19.0159
ENSMUST00000091064.7	ENSMUSG00000070934	Rraga	protein_coding	0.000192174	0.00648368	-0.290769	0.0779731	7.61818	0.030079	0.000540567	0.00535323	0.00857914	0.00857914	48.9586	46.1157	44.5564	30.707	36.7685	35.7655
ENSMUST00000087200.3	ENSMUSG00000024429	Gnl1	protein_coding	0.0001936	0.00652404	0.311836	0.0836644	8.59263	0.0375722	0.000232361	0.0102672	0.00747841	0.0102672	39.0018	37.9699	46.3078	58.3608	51.6827	56.3328
ENSMUST00000180077.6	ENSMUSG00000062691	Cebpzos	protein_coding	0.000193647	0.00652404	-0.499399	0.133989	6.0022	0.0963635	0.00466884	0.0222607	0.0150615	0.0222607	41.2779	31.785	39.479	17.9635	24.6772	24.623
ENSMUST00000198631.1	ENSMUSG00000029484	Anxa3	protein_coding	0.000194233	0.00653458	-1.11701	0.299755	4.19292	0.482137	0.0358033	0.0989767	0.0597652	0.0989767	2.41754	3.4749	1.95245	0.483729	0.983602	1.11323
ENSMUST00000098817.3	ENSMUSG00000031600	Vps37a	protein_coding	0.000194236	0.00653458	-0.43567	0.116915	5.96995	0.0733454	0.00426433	0.0162392	0.0152648	0.0162392	2.62071	3.2553	2.36087	1.53139	2.01605	1.67595
ENSMUST00000022531.13	ENSMUSG00000021959	Lats2	protein_coding	0.000194931	0.00655328	-0.318405	0.0854664	7.88004	0.0391799	0.000541801	0.010415	0.008123	0.010415	16.5817	18.2777	14.5978	11.4082	13.4506	10.7024
ENSMUST00000043627.7	ENSMUSG00000039640	Mrpl12	protein_coding	0.000195109	0.00655461	0.2668	0.0716192	8.62205	0.026385	0.000224771	0.00606304	0.00746918	0.00746918	112.899	100.385	108.363	135.723	128.532	151.342
ENSMUST00000160591.7	ENSMUSG00000026709	Dars2	retained_intron	0.000197343	0.00662496	0.53369	0.143373	5.44825	0.103758	0.0101565	0.0127315	0.0206772	0.0206772	2.13181	2.52208	3.02972	3.8702	4.1371	4.78584
ENSMUST00000035635.9	ENSMUSG00000034663	Bmp2k	protein_coding	0.00019898	0.00667515	-0.439573	0.118155	6.12897	0.0747201	0.00385862	0.0170823	0.0143184	0.0170823	2.27453	2.58792	2.10002	1.27581	1.82274	1.36479
ENSMUST00000013886.8	ENSMUSG00000019254	Ppp1r12c	protein_coding	0.000199535	0.00668901	0.419599	0.112807	7.56624	0.0680896	0.0025833	0.016505	0.00868522	0.016505	15.1077	14.3085	10.1893	19.5789	18.7989	20.4083
ENSMUST00000056328.5	ENSMUSG00000053128	Rnf26	protein_coding	0.000201042	0.00673476	0.278751	0.0749793	7.95042	0.0287401	0.000411114	0.00637573	0.00802174	0.00802174	22.9563	23.8798	23.2921	34.7115	28.38	28.8573
ENSMUST00000127401.7	ENSMUSG00000001918	Slc1a5	retained_intron	0.000201222	0.006736	0.945843	0.254431	5.29993	0.298243	0.0741228	-0.0368011	0.0229803	0.0229803	0.91664	1.44515	1.2434	3.264	3.29776	2.54959
ENSMUST00000068581.8	ENSMUSG00000050953	Gja1	protein_coding	0.000201482	0.00673994	0.289659	0.077925	8.13406	0.0324575	0.000305461	0.008803	0.00779777	0.008803	28.6385	35.1851	28.5118	36.8118	43.4394	41.1598
ENSMUST00000211601.1	ENSMUSG00000031691	Tnpo2	protein_coding	0.000201738	0.00674374	-0.368486	0.0991399	6.95368	0.0490504	0.00448897	0.0059058	0.0102541	0.0102541	13.4462	11.0899	10.599	7.29333	8.67964	7.97033
ENSMUST00000116551.9	ENSMUSG00000038812	Trmt112	protein_coding	0.000202085	0.00675054	0.336188	0.0904607	7.1693	0.0396732	0.00263909	0.00456904	0.00963562	0.00963562	37.0991	31.27	37.2818	46.7834	48.9417	50.1135
ENSMUST00000030398.9	ENSMUSG00000028645	Slc2a1	protein_coding	0.000202423	0.00675484	0.311721	0.0838867	7.63652	0.0329492	0.0020125	0.00273531	0.00854295	0.00854295	13.4324	15.9607	14.3854	19.2081	18.9364	20.85
ENSMUST00000058839.9	ENSMUSG00000043008	Klhl6	protein_coding	0.000202499	0.00675484	-1.02785	0.276609	3.96768	0.339948	0.0327547	-0.00399504	0.0820144	0.0820144	1.40805	0.966094	0.954509	0.340165	0.40675	0.39698
ENSMUST00000109627.7	ENSMUSG00000089715	Cbx6	protein_coding	0.00020383	0.00679442	0.477808	0.128643	8.12258	0.088349	0.000533112	0.0242904	0.00781011	0.0242904	11.7403	10.7212	12.025	23.2683	16.7359	15.9154
ENSMUST00000023101.9	ENSMUSG00000022464	Slc38a4	protein_coding	0.000204328	0.00680622	-0.328009	0.0883262	7.66902	0.0416387	0.00108668	0.0106156	0.00848045	0.0106156	18.7517	22.0165	19.8677	12.4766	16.6037	14.1744
ENSMUST00000119993.7	ENSMUSG00000028152	Tspan5	protein_coding	0.000205583	0.00684321	0.891517	0.240168	5.6387	0.282805	0.0684573	-0.0130016	0.0180637	0.0180637	3.10006	1.88729	3.08507	5.67322	5.93012	7.47079
ENSMUST00000027338.3	ENSMUSG00000026154	Sdhaf4	protein_coding	0.000206812	0.00687925	-0.512789	0.138198	5.54702	0.101804	0.00438549	0.0242624	0.0192083	0.0242624	22.7847	17.3548	19.9872	9.32856	13.1005	12.979
ENSMUST00000117868.7	ENSMUSG00000029462	Vps29	protein_coding	0.000206989	0.0068803	-0.392745	0.105852	6.46415	0.0528956	0.00440244	0.00387393	0.0124044	0.0124044	44.0683	36.9331	40.9625	25.3702	26.1763	29.1736
ENSMUST00000076228.2	ENSMUSG00000061979	Rcc1l	protein_coding	0.000208118	0.00691298	0.411719	0.111007	7.11159	0.0656408	0.0014161	0.0170677	0.00979027	0.0170677	13.88	9.84359	10.7144	18.3516	15.7405	16.7534
ENSMUST00000022153.7	ENSMUSG00000021650	Ptcd2	protein_coding	0.000209256	0.0069459	0.324356	0.0874848	6.92583	0.033307	0.00113661	0.00104455	0.0103438	0.0103438	17.0772	15.8377	16.0043	23.2113	21.3247	21.9577
ENSMUST00000002445.9	ENSMUSG00000002372	Ranbp3	protein_coding	0.000209936	0.00696356	0.273654	0.0738259	8.30381	0.0263725	0.00053484	0.00434826	0.00764056	0.00764056	39.1576	36.1315	40.314	51.4384	46.8514	52.1467
ENSMUST00000087933.9	ENSMUSG00000041763	Tpp2	protein_coding	0.000211735	0.0070183	-0.501914	0.135484	6.9985	0.0976025	0.0162667	0.0112673	0.0101153	0.0112673	9.63457	11.5143	9.3708	4.7177	7.15169	6.49661
ENSMUST00000039490.8	ENSMUSG00000035678	Tnfsf9	protein_coding	0.000211941	0.00702021	0.645212	0.174177	4.686	0.136212	0.00961479	0.00453848	0.0358918	0.0358918	1.60065	2.02796	2.03985	3.71533	3.72607	3.1981
ENSMUST00000021832.6	ENSMUSG00000021400	Wrnip1	protein_coding	0.000214141	0.00708812	0.318211	0.0859631	7.26217	0.0392451	0.00084841	0.0102361	0.0093982	0.0102361	14.0156	13.7061	10.4831	17.8321	17.1512	16.511
ENSMUST00000021443.6	ENSMUSG00000021048	Mthfd1	protein_coding	0.000215391	0.00712449	0.312677	0.0845018	8.35987	0.0320242	0.003112	0.000255496	0.00759883	0.00759883	30.0536	31.6433	31.0013	45.1996	41.6129	38.751
ENSMUST00000022962.7	ENSMUSG00000022337	Emc2	protein_coding	0.000217243	0.00718071	-0.589217	0.159331	6.45853	0.134617	0.00170083	0.0363786	0.0124386	0.0363786	23.6606	26.9158	27.7922	10.5046	15.6038	17.4083
ENSMUST00000173441.8	ENSMUSG00000024338	Psmb8	protein_coding	0.000217742	0.0071922	1.89017	0.511203	4.10291	1.28901	0.324637	-0.0531466	0.0673552	0.0673552	0.425578	1.27825	1.21689	6.50561	8.1892	3.66606
ENSMUST00000084820.5	ENSMUSG00000038708	Golga4	protein_coding	0.000217974	0.00719482	-0.574319	0.155338	6.68089	0.127909	0.00469763	0.0314973	0.0112763	0.0314973	3.30374	5.10267	3.51429	1.86946	2.54928	2.11612
ENSMUST00000168578.2	ENSMUSG00000030431	Tmem238	protein_coding	0.000218277	0.00719978	0.728246	0.19699	5.29156	0.205669	0.00498566	0.053222	0.0231134	0.053222	3.30036	3.44029	1.88411	5.76305	4.95215	6.491
ENSMUST00000111742.7	ENSMUSG00000030268	Bcat1	protein_coding	0.000218972	0.00721768	0.431833	0.116836	8.94727	0.0723248	0.000286128	0.0201899	0.00745616	0.0201899	58.6492	67.9787	82.3326	114.494	104.458	96.4111
ENSMUST00000030896.14	ENSMUSG00000029030	Tprgl	protein_coding	0.000219318	0.00722403	-0.283628	0.0767463	7.76495	0.0282715	0.00052728	0.00464531	0.00830771	0.00830771	51.0425	42.8282	43.4205	35.0788	32.6616	34.0564
ENSMUST00000041190.16	ENSMUSG00000037570	Mcrs1	protein_coding	0.00021956	0.00722684	0.335623	0.0908224	7.50089	0.0422212	0.00354664	0.00698878	0.00882642	0.00882642	22.4315	21.1575	21.5222	34.5223	26.1958	29.5591
ENSMUST00000112172.3	ENSMUSG00000049775	Tmsb4x	protein_coding	0.000219709	0.00722684	-0.572484	0.154926	10.701	0.127124	3.8909e-05	0.0359643	0.0107178	0.0359643	3264.59	2813.6	2921.79	1257.9	1789.8	2025.55
ENSMUST00000052678.8	ENSMUSG00000025278	Flnb	protein_coding	0.000220519	0.00724844	-0.324186	0.0877537	10.7166	0.0407698	2.37573e-05	0.0115273	0.0107809	0.0115273	129.99	170.866	153.488	115.954	101.897	105.9
ENSMUST00000079421.14	ENSMUSG00000002307	Daxx	protein_coding	0.000220933	0.00725697	0.323146	0.0874836	7.04994	0.0377457	0.00151671	0.00650655	0.00996336	0.00996336	10.2218	9.75663	10.3787	15.6125	13.7088	12.3916
ENSMUST00000055389.8	ENSMUSG00000047434	Xxylt1	protein_coding	0.000221287	0.00726355	0.330034	0.0893581	6.85044	0.0406913	0.00137616	0.00864204	0.0106012	0.0106012	6.38386	7.05872	5.77943	9.63583	9.10388	7.72501
ENSMUST00000173341.7	ENSMUSG00000060261	Gtf2i	protein_coding	0.000222948	0.00731302	0.480316	0.130114	7.76733	0.0895267	0.00265028	0.0227444	0.00830364	0.0227444	10.4207	13.742	11.0544	22.9264	17.1021	16.5095
ENSMUST00000045713.3	ENSMUSG00000041073	Nacad	protein_coding	0.000224983	0.00737463	-0.384837	0.104315	6.33037	0.0574878	0.00251787	0.0138046	0.0131981	0.0138046	3.33964	2.97231	3.81238	2.35941	2.01048	2.43851
ENSMUST00000050536.13	ENSMUSG00000046856	Gpr1	protein_coding	0.000226202	0.00740945	-1.00832	0.273421	3.93189	0.338331	0.0255273	0.0161193	0.0866113	0.0866113	1.37709	1.35088	1.38695	0.351631	0.529381	0.623487
ENSMUST00000031534.8	ENSMUSG00000029554	Mad1l1	protein_coding	0.000227044	0.00743187	0.393726	0.106792	7.71663	0.0601914	0.000661892	0.0164448	0.00839254	0.0164448	16.6608	17.8216	21.0846	30.8192	23.9883	26.2863
ENSMUST00000053740.14	ENSMUSG00000017421	Zfp207	protein_coding	0.000228193	0.00746432	-0.456491	0.123859	6.19935	0.0672224	0.00908441	-0.00320059	0.0139272	0.0139272	12.6888	13.1351	12.1964	7.03133	8.09091	8.59098
ENSMUST00000117291.7	ENSMUSG00000040675	Mthfd1l	protein_coding	0.000230186	0.00752431	0.336506	0.0913587	7.27729	0.0439866	0.0019001	0.0106195	0.00936057	0.0106195	8.30396	9.2775	10.4266	14.3096	12.6234	11.7453
ENSMUST00000006391.4	ENSMUSG00000045827	Serpinb9	protein_coding	0.000230856	0.00754099	-0.716333	0.194518	5.92141	0.199345	0.0034807	0.053275	0.0155862	0.053275	5.87113	5.28396	4.51866	1.82594	3.44465	2.46719
ENSMUST00000031542.12	ENSMUSG00000029561	Oasl2	protein_coding	0.000233467	0.007621	4.55125	1.23684	3.7173	8.0499	0.258344	2.03631	0.121278	2.03631	0	0.0384811	0.289528	4.43991	5.0476	2.09567
ENSMUST00000052437.5	ENSMUSG00000049988	Lrrc25	protein_coding	0.0002342	0.00763965	0.912846	0.248127	4.0449	0.298156	0.0192123	0.041	0.0731382	0.0731382	0.452641	0.412224	0.653219	1.54931	1.23536	0.974297
ENSMUST00000061158.4	ENSMUSG00000051154	Commd3	protein_coding	0.000237201	0.00773219	-0.463122	0.125996	7.62817	0.0833946	0.000545631	0.0232668	0.00855936	0.0232668	102.297	100.27	109.236	50.9064	68.5628	75.4971
ENSMUST00000040445.8	ENSMUSG00000036442	Thap11	protein_coding	0.000237729	0.00774406	0.304507	0.0828563	7.2506	0.0328394	0.000870576	0.00540694	0.00942716	0.00942716	20.0689	18.5662	16.7589	27.2663	23.3793	23.7339
ENSMUST00000035495.14	ENSMUSG00000032815	Fanca	protein_coding	0.000238208	0.00775114	0.380682	0.103598	6.36884	0.0486816	0.00312163	0.003386	0.0129771	0.0129771	2.52969	3.0669	2.91464	4.34167	3.94964	3.97048
ENSMUST00000224845.1	ENSMUSG00000035248	Tut7	retained_intron	0.000238274	0.00775114	-0.977615	0.266051	4.66016	0.371659	0.0199836	0.0861909	0.0366924	0.0861909	3.5154	1.77658	1.91401	1.02108	0.935705	0.627471
ENSMUST00000021796.8	ENSMUSG00000021367	Edn1	protein_coding	0.000239971	0.00779659	-0.430352	0.117175	5.7772	0.0651278	0.0039026	0.00805601	0.0166924	0.0166924	6.86232	5.93379	5.00024	3.77762	3.86134	3.63339
ENSMUST00000143610.2	ENSMUSG00000041688	Amot	protein_coding	0.000240002	0.00779659	-1.06782	0.290746	4.75721	0.443512	0.0239634	0.102836	0.033846	0.102836	2.49144	3.04898	2.03845	0.492075	1.00285	1.20568
ENSMUST00000001724.11	ENSMUSG00000001674	Ddx18	protein_coding	0.000240433	0.00780524	0.266752	0.0726402	8.27708	0.0240146	0.00025268	0.00308182	0.00766222	0.00766222	43.1138	47.9704	50.0579	61.1151	59.7674	60.2759
ENSMUST00000050073.12	ENSMUSG00000028035	Dnajb4	protein_coding	0.000241256	0.00782659	-0.638755	0.173983	7.60934	0.158726	0.000553076	0.0448519	0.00859683	0.0448519	38.2589	42.2446	37.0953	14.4192	23.6949	24.749
ENSMUST00000153739.8	ENSMUSG00000067786	Nnat	protein_coding	0.000241607	0.00783256	-0.937794	0.25546	5.55022	0.342149	0.0307033	0.0671866	0.0191645	0.0671866	13.8854	9.31213	8.97218	3.0289	3.57523	6.29612
ENSMUST00000139517.8	ENSMUSG00000042303	Sgsm3	protein_coding	0.000242158	0.00784505	0.384553	0.104771	6.35757	0.0528609	0.00342316	0.00719745	0.0130423	0.0130423	3.6633	4.353	4.60065	6.49101	5.65743	6.07689
ENSMUST00000144826.1	ENSMUSG00000023087	Noct	protein_coding	0.000242695	0.00785705	-0.444383	0.12109	7.26094	0.0768382	0.00138602	0.0206082	0.00940128	0.0206082	4.97041	6.06792	4.89845	3.4271	2.78016	3.93511
ENSMUST00000175934.7	ENSMUSG00000024613	Tcof1	protein_coding	0.000243548	0.00787927	0.521032	0.142011	7.9606	0.105643	0.00396173	0.026289	0.00800781	0.026289	10.1396	11.9202	13.4646	24.0545	18.6316	16.7089
ENSMUST00000194192.2	ENSMUSG00000026131	Dst	protein_coding	0.000243843	0.00788342	-0.708218	0.193046	5.14103	0.195192	0.0199653	0.035935	0.0256133	0.035935	0.819758	1.35155	1.25264	0.43135	0.651432	0.561797
ENSMUST00000099078.9	ENSMUSG00000074582	Arfgef2	protein_coding	0.000244189	0.00788921	-0.296047	0.0807047	7.38227	0.0329016	0.000665588	0.00759494	0.00910428	0.00910428	5.59266	6.42496	5.56615	4.81581	4.21124	3.89251
ENSMUST00000200045.4	ENSMUSG00000104713	Gbp6	nonsense_mediated_decay	0.00024509	0.0079129	3.83181	1.04485	1.22276	4.69093	0.358221	-0.000593065	1.27934	1.27934	0	0	0	0.11472	0.461491	0.0936297
ENSMUST00000171171.8	ENSMUSG00000024037	Wdr4	protein_coding	0.000246622	0.00795694	0.34115	0.0930642	6.99019	0.0405147	0.0028509	0.00414887	0.0101405	0.0101405	6.0121	5.1578	5.97674	7.85643	7.50664	8.42562
ENSMUST00000142768.7	ENSMUSG00000018770	Atp5g3	processed_transcript	0.0002471	0.00796692	-0.817665	0.223086	4.56777	0.260294	0.0216639	0.0529871	0.0398509	0.0529871	7.14683	5.07074	6.58674	1.81788	3.28275	3.19918
ENSMUST00000195032.5	ENSMUSG00000058407	Txndc9	protein_coding	0.00024775	0.00798243	-0.660195	0.180156	5.04678	0.137998	0.0213611	-0.0123103	0.0273231	0.0273231	4.93695	4.54647	4.5145	2.06393	2.42089	2.6491
ENSMUST00000031654.9	ENSMUSG00000029649	Pomp	protein_coding	0.00024878	0.0079938	-0.349559	0.0954163	8.12007	0.0475825	0.000512271	0.0131441	0.00781283	0.0131441	92.3134	71.5128	84.2753	51.9752	57.8273	62.0231
ENSMUST00000201831.3	ENSMUSG00000106734	Gm20559	lncRNA	0.000248342	0.0079938	2.01273	0.549332	3.0016	1.4286	0.125697	0.140895	0.326952	0.326952	0.148943	0.069483	0.0444712	0.588948	0.981451	0.391938
ENSMUST00000110086.1	ENSMUSG00000037946	Fgd3	protein_coding	0.000248544	0.0079938	-0.415843	0.113502	6.10825	0.0660987	0.00488855	0.0128879	0.0144354	0.0144354	6.79861	4.95974	5.19482	3.74788	3.34209	3.90143
ENSMUST00000019723.7	ENSMUSG00000019579	Mydgf	protein_coding	0.000248643	0.0079938	0.266428	0.0727219	8.31607	0.0243394	0.000301702	0.00350365	0.00763101	0.00763101	62.2036	57.7237	65.3183	82.2852	76.504	80.299
ENSMUST00000030090.3	ENSMUSG00000028393	Alad	protein_coding	0.000249939	0.00802558	0.312654	0.0853704	7.17479	0.0326995	0.00131093	0.0029063	0.00962123	0.00962123	27.7078	24.2677	27.3273	36.3873	34.3457	36.0889
ENSMUST00000102884.9	ENSMUSG00000020122	Egfr	protein_coding	0.000250472	0.00803723	-0.42634	0.11643	5.90805	0.0675265	0.00465534	0.0115906	0.0156785	0.0156785	4.05339	4.75586	4.25024	3.17021	2.3372	2.972
ENSMUST00000034465.8	ENSMUSG00000031984	2810004N23Rik	protein_coding	0.000251476	0.00805849	0.280998	0.0767597	7.68436	0.0282906	0.000386416	0.0053669	0.00845166	0.00845166	24.1314	20.8637	24.3728	30.4205	29.2802	30.8271
ENSMUST00000035009.15	ENSMUSG00000032436	Cmtm7	protein_coding	0.000251436	0.00805849	-0.274994	0.0751187	7.89044	0.0277003	0.000356757	0.00591053	0.00810748	0.00810748	103.469	91.7559	89.0176	76.2011	64.5032	72.4901
ENSMUST00000002391.14	ENSMUSG00000002320	Tm9sf1	protein_coding	0.000253181	0.00810762	0.333301	0.0910903	7.2618	0.0345415	0.00304704	-0.00152886	0.00939913	0.00939913	14.6385	14.2326	13.7733	20.1156	20.4121	18.4143
ENSMUST00000236216.1	ENSMUSG00000024477	Pggt1b	protein_coding	0.000253468	0.00811132	-0.459606	0.125619	6.10954	0.0823074	0.00385853	0.0198117	0.0144281	0.0198117	2.20487	2.84089	2.28162	1.24613	1.80873	1.52634
ENSMUST00000034311.14	ENSMUSG00000031848	Lsm4	protein_coding	0.00025399	0.00811812	0.371459	0.101541	7.97264	0.0537674	0.000886645	0.0145794	0.00799158	0.0145794	97.1295	76.3662	68.7574	121.818	106.325	114.703
ENSMUST00000222634.1	ENSMUSG00000034126	Pomt2	nonsense_mediated_decay	0.000254024	0.00811812	0.402821	0.110116	6.32134	0.0506237	0.00493881	-0.0025085	0.0132493	0.0132493	4.66029	4.2776	4.59121	6.92425	6.46371	6.55611
ENSMUST00000025264.7	ENSMUSG00000024400	Wdr33	protein_coding	0.000255018	0.00814435	0.298942	0.0817414	7.36083	0.0334991	0.00086638	0.00749507	0.0091561	0.0091561	7.13781	7.52266	8.23034	11.2471	9.78755	9.52906
ENSMUST00000071134.3	ENSMUSG00000062380	Tubb3	protein_coding	0.000255721	0.00816129	-0.385708	0.105487	8.0512	0.0579843	0.000403807	0.0162874	0.00789174	0.0162874	49.0887	49.6804	65.0595	35.1968	36.4361	37.7794
ENSMUST00000088355.11	ENSMUSG00000022483	Col2a1	protein_coding	0.000256026	0.00816551	-1.04775	0.286572	7.21453	0.427884	0.0203984	0.102787	0.00951848	0.102787	8.14042	12.2784	13.2025	6.05913	3.17088	2.85409
ENSMUST00000229336.1	ENSMUSG00000022463	Srebf2	protein_coding	0.000257604	0.00821031	4.75316	1.30061	1.68343	6.90691	1.56335	-1.40194	0.974006	0.974006	0	0	0	0.190286	0.575637	0.438815
ENSMUST00000010049.5	ENSMUSG00000009905	Kdsr	protein_coding	0.00025819	0.00822344	-0.341323	0.0934108	6.60145	0.0422453	0.00143854	0.00768014	0.0116498	0.0116498	5.63152	5.48374	4.40865	3.58759	3.74384	3.47407
ENSMUST00000169437.8	ENSMUSG00000070436	Serpinh1	protein_coding	0.000260443	0.00828961	0.475022	0.13008	8.32739	0.0879987	0.00418415	0.0211971	0.0076224	0.0211971	30.5669	41.7755	42.6559	67.8359	60.4002	53.9254
ENSMUST00000123362.7	ENSMUSG00000031393	Mecp2	protein_coding	0.000261792	0.00832693	4.38718	1.20182	1.56131	5.89787	1.11365	-0.959078	1.05292	1.05292	0	0	0.00165419	0.563526	0.47545	1.31933
ENSMUST00000225962.1	ENSMUSG00000056492	Adgrf5	protein_coding	0.000262093	0.0083309	-0.923937	0.253123	4.31546	0.281425	0.0444651	-0.0128055	0.051642	0.051642	0.556219	0.752082	0.866571	0.28283	0.307191	0.245834
ENSMUST00000073150.5	ENSMUSG00000021846	Peli2	protein_coding	0.000262727	0.00834542	0.75666	0.207331	4.73505	0.204766	0.0300204	0.0112372	0.0344589	0.0344589	0.41725	0.288901	0.469576	0.829091	0.900386	0.72144
ENSMUST00000056977.13	ENSMUSG00000070691	Runx3	protein_coding	0.000263008	0.00834874	0.680892	0.186584	4.53009	0.179036	0.0109316	0.0390084	0.0412889	0.0412889	0.48453	0.483482	0.360687	1.1313	0.881866	0.645422
ENSMUST00000159348.2	ENSMUSG00000053080	2700081O15Rik	protein_coding	0.000263186	0.00834876	0.417924	0.114529	6.78224	0.0681382	0.00343922	0.016236	0.0108551	0.016236	3.16667	4.20779	3.29332	6.17163	5.11222	4.76598
ENSMUST00000111557.7	ENSMUSG00000030313	Dennd5b	protein_coding	0.000264841	0.00839564	-0.3422	0.0938185	6.57704	0.0388608	0.00142966	0.00323364	0.0117732	0.0117732	2.49718	2.91367	2.70353	1.91834	2.01337	1.73834
ENSMUST00000042614.12	ENSMUSG00000042744	Hectd4	protein_coding	0.000266803	0.00845216	-0.320295	0.0878588	6.85437	0.0391014	0.00099158	0.0094143	0.0105872	0.0105872	1.60814	2.06555	1.81985	1.31514	1.41828	1.19734
ENSMUST00000174692.7	ENSMUSG00000021281	Tnfaip2	nonsense_mediated_decay	0.0002683	0.0084939	-4.90975	1.3473	1.7939	7.26823	1.81771	-1.77204	0.90513	0.90513	1.66878	2.2112	1.16705	0.000422927	3.36074e-05	0.000676894
ENSMUST00000066052.11	ENSMUSG00000053553	3110082I17Rik	protein_coding	0.00026858	0.00849707	0.36255	0.0994962	6.38238	0.0429435	0.00195123	0.00243715	0.012898	0.012898	8.80206	9.74748	10.0215	14.1606	12.9551	13.5037
ENSMUST00000100676.2	ENSMUSG00000021835	Bmp4	protein_coding	0.000269926	0.00853392	-0.535595	0.147038	6.02554	0.100505	0.0175113	0.000545959	0.0149188	0.0149188	9.47766	8.9394	10.2734	5.74621	6.36764	4.55787
ENSMUST00000212494.1	ENSMUSG00000045128	Rpl18a	protein_coding	0.000270677	0.00855193	0.266708	0.0732341	9.51435	0.0249642	0.000208947	0.00432135	0.00783591	0.00783591	1088.55	1026.02	1139.11	1472.97	1366.09	1354.8
ENSMUST00000108548.7	ENSMUSG00000060600	Eno3	protein_coding	0.000271251	0.00856435	-0.457867	0.125742	6.43656	0.077218	0.0111429	0.00676373	0.0125738	0.0125738	14.9199	12.9405	15.0996	8.54372	7.80127	10.6041
ENSMUST00000085555.6	ENSMUSG00000016181	Utp25	protein_coding	0.000271846	0.00857742	0.362857	0.0996655	6.55564	0.0420126	0.0030148	0.00012646	0.011885	0.011885	3.24351	2.87969	2.795	4.16092	4.20054	4.28194
ENSMUST00000039412.14	ENSMUSG00000039842	Mcph1	protein_coding	0.000272145	0.00858111	0.4399	0.120836	5.87492	0.0699124	0.00598688	0.0088366	0.0159152	0.0159152	1.46483	1.87269	1.93129	2.61035	2.97561	2.46928
ENSMUST00000099207.4	ENSMUSG00000074682	Zcchc3	protein_coding	0.000273483	0.00861754	0.454691	0.124942	6.2424	0.0807559	0.00218721	0.0212287	0.0136898	0.0212287	3.70042	4.10433	2.9613	6.52568	5.52226	4.72087
ENSMUST00000034426.13	ENSMUSG00000031948	Kars	protein_coding	0.000274766	0.00865221	0.262208	0.0720748	9.2495	0.0247627	0.000199611	0.00497143	0.00759255	0.00759255	127.888	125.413	139.868	180.072	158.154	166.544
ENSMUST00000231962.1	ENSMUSG00000021760	Gpx8	protein_coding	0.000275707	0.00867603	-0.740592	0.203621	5.58286	0.214297	0.0161545	0.0460376	0.0187344	0.0460376	26.3327	21.5108	15.4402	7.39064	10.3756	11.7666
ENSMUST00000165318.3	ENSMUSG00000061898	Rbak	protein_coding	0.000277397	0.0087234	4.22916	1.16328	1.42143	5.76876	0.884033	-0.380257	1.14581	1.14581	0	0	0	0.57299	0.404182	0.0833484
ENSMUST00000201185.3	ENSMUSG00000026879	Gsn	protein_coding	0.000277897	0.00872753	-0.332977	0.091601	10.5195	0.043331	5.38377e-05	0.0125323	0.0100428	0.0125323	493.015	420.284	423.727	332.943	272.206	344.606
ENSMUST00000177738.7	ENSMUSG00000031060	Rbm10	protein_coding	0.000277781	0.00872753	0.64143	0.17645	5.77671	0.148493	0.0300056	0.00132391	0.0166966	0.0166966	2.14104	1.93891	2.50972	5.17556	3.74626	3.57273
ENSMUST00000029480.8	ENSMUSG00000027881	Prpf38b	protein_coding	0.000278531	0.00873582	0.431612	0.118754	6.58557	0.0728098	0.00684969	0.0143042	0.0117296	0.0143042	6.05501	7.22011	4.81667	8.3869	10.0225	8.8588
ENSMUST00000004222.13	ENSMUSG00000022702	Hira	protein_coding	0.000278368	0.00873582	0.398038	0.109512	6.93493	0.0545735	0.00767521	0.00112891	0.0103142	0.0103142	5.09936	5.84134	5.25654	8.85764	8.06874	6.9799
ENSMUST00000034272.8	ENSMUSG00000031813	Mvb12a	protein_coding	0.000279146	0.00874349	0.279407	0.0768887	7.7166	0.0270428	0.0004752	0.00405258	0.0083926	0.0083926	55.2812	53.6615	49.4076	65.5017	65.4531	75.8728
ENSMUST00000161012.7	ENSMUSG00000050410	Tcf19	protein_coding	0.000279115	0.00874349	0.492754	0.135597	6.29268	0.0843221	0.0141694	0.00018081	0.0134105	0.0134105	7.15545	6.53254	7.86015	13.2631	11.3423	10.2012
ENSMUST00000054289.12	ENSMUSG00000044533	Rps2	protein_coding	0.000279991	0.00876415	0.319922	0.0880564	8.93203	0.0400097	0.000807293	0.0108236	0.00745311	0.0108236	192.914	158.336	175.793	225.419	222.729	271.449
ENSMUST00000189821.6	ENSMUSG00000026193	Fn1	protein_coding	0.000280306	0.00876819	-0.815248	0.22441	6.80745	0.25982	0.0266145	0.0489252	0.0107587	0.0489252	3.29736	6.95508	4.65379	1.98763	2.40682	1.87757
ENSMUST00000055117.8	ENSMUSG00000044857	Lemd2	protein_coding	0.000282316	0.00882522	0.282571	0.0778216	7.69749	0.0300683	0.000656946	0.00698597	0.00842737	0.00842737	18.5956	17.4177	18.2437	26.0718	21.0379	24.5129
ENSMUST00000026234.4	ENSMUSG00000025213	Kazald1	protein_coding	0.000282732	0.00883238	0.786	0.216491	4.98073	0.241581	0.0130846	0.0572182	0.0286162	0.0572182	2.10025	1.83455	2.27582	6.66059	4.03581	3.35276
ENSMUST00000110737.2	ENSMUSG00000063362	Alg11	protein_coding	0.000283091	0.00883774	-4.90269	1.35049	1.7582	7.47566	1.80864	-1.4777	0.927097	0.927097	1.13207	0.303846	0.257688	0	0	0
ENSMUST00000050630.13	ENSMUSG00000038954	Supt3	protein_coding	0.000284329	0.00887055	0.368935	0.101658	6.47532	0.049439	0.00316435	0.0075921	0.0123372	0.0123372	11.7669	10.6937	11.64	17.5807	13.9966	17.3102
ENSMUST00000110516.2	ENSMUSG00000021301	Hecw1	protein_coding	0.000286113	0.00891442	-1.50324	0.414393	3.91662	0.687633	0.168911	-0.156764	0.0886711	0.0886711	0.38061	0.337648	0.314297	0.0639608	0.0810301	0.0779398
ENSMUST00000022901.15	ENSMUSG00000022292	Rrm2b	protein_coding	0.000285976	0.00891442	-0.909253	0.250643	5.2349	0.323409	0.00539955	0.0888333	0.0240288	0.0888333	2.39087	2.54551	1.72276	0.551991	1.1015	1.06333
ENSMUST00000019576.14	ENSMUSG00000005481	Ddx39	protein_coding	0.000287065	0.00893231	0.259481	0.0715473	9.12269	0.0248175	0.000161005	0.00561203	0.00751753	0.00751753	155.179	134.822	144.259	181.063	173.812	199.882
ENSMUST00000061681.8	ENSMUSG00000044645	Gm7334	processed_pseudogene	0.000287005	0.00893231	-0.369348	0.10184	6.45969	0.0488617	0.00312542	0.00679508	0.0124316	0.0124316	35.1542	38.2966	39.5798	22.2511	27.553	27.1197
ENSMUST00000114379.7	ENSMUSG00000031387	Renbp	protein_coding	0.000288475	0.00897026	-0.713255	0.196736	5.41897	0.160359	0.0369322	-0.0272578	0.0211256	0.0211256	7.01971	8.58936	6.4608	3.57216	3.36897	3.64833
ENSMUST00000038211.12	ENSMUSG00000069793	Slfn9	protein_coding	0.000288867	0.00897654	0.776281	0.214142	5.43774	0.235812	0.00602029	0.0627647	0.0208379	0.0627647	0.716328	0.83024	1.02009	1.47294	2.65781	1.5232
ENSMUST00000072376.12	ENSMUSG00000060450	Rnf14	protein_coding	0.000289737	0.00899766	-0.444442	0.122628	7.37637	0.0773038	0.00429245	0.018264	0.00911852	0.018264	21.4326	20.0267	18.5498	10.0303	14.5479	13.8285
ENSMUST00000199969.4	ENSMUSG00000068798	Rap1a	nonsense_mediated_decay	0.000292185	0.00906773	-0.539669	0.148992	6.05225	0.114011	0.00898038	0.0243176	0.0147593	0.0243176	14.9096	17.5462	16.792	7.02026	10.4304	11.1552
ENSMUST00000160180.8	ENSMUSG00000024646	Cyb5a	protein_coding	0.000292448	0.00906992	-0.486643	0.134361	7.24219	0.0927098	0.000910649	0.0261687	0.00944832	0.0261687	85.4297	64.3124	76.4779	36.8681	50.8701	49.6884
ENSMUST00000036680.7	ENSMUSG00000039759	Thap3	protein_coding	0.000293538	0.00909192	0.42501	0.117376	5.85831	0.0642257	0.00462707	0.00791745	0.0160385	0.0160385	8.06105	6.19494	7.27888	11.8714	10.2454	10.356
ENSMUST00000209797.1	ENSMUSG00000006763	Saal1	retained_intron	0.000293542	0.00909192	0.465772	0.128633	5.76538	0.0772217	0.00802401	0.00714937	0.0167957	0.0167957	4.62039	3.74128	3.72735	7.28264	5.71053	6.06008
ENSMUST00000027634.12	ENSMUSG00000026385	Dbi	protein_coding	0.000294588	0.0091064	-0.377354	0.104241	7.77143	0.0557584	0.000541102	0.0157582	0.00829667	0.0157582	229.973	187.39	216.946	123.101	144.738	160.329
ENSMUST00000226087.1	ENSMUSG00000056492	Adgrf5	protein_coding	0.00029451	0.0091064	-1.10771	0.305989	3.99505	0.457672	0.0617357	0.0502247	0.0787082	0.0787082	0.40568	0.869577	0.477455	0.229212	0.185606	0.132516
ENSMUST00000156766.7	ENSMUSG00000031328	Flna	processed_transcript	0.000294232	0.0091064	1.28657	0.355374	7.00284	0.648127	0.0112976	0.178138	0.0101022	0.178138	31.6312	24.0926	24.014	182.122	81.7948	56.4307
ENSMUST00000124659.1	ENSMUSG00000001552	Jup	processed_transcript	0.000296411	0.00915676	-1.01609	0.280811	4.05798	0.320265	0.0465126	-0.0333481	0.0717699	0.0717699	0.776305	1.03118	0.859429	0.329899	0.286168	0.323909
ENSMUST00000001812.4	ENSMUSG00000001761	Smo	protein_coding	0.000297134	0.0091731	0.262631	0.0725945	8.40515	0.0224754	0.000336183	0.00189237	0.00756877	0.00756877	26.6134	25.0986	26.7391	35.1638	33.4269	32.3244
ENSMUST00000064231.7	ENSMUSG00000052396	Mogat2	protein_coding	0.000299001	0.00922469	-0.991129	0.274083	6.51771	0.384847	0.00174827	0.110934	0.0120919	0.110934	24.7283	14.9052	14.4576	5.38924	4.94895	9.76825
ENSMUST00000049811.7	ENSMUSG00000048799	Cep120	protein_coding	0.000299771	0.00924243	-0.330787	0.0914915	6.79742	0.0364031	0.00175939	0.00271187	0.0107967	0.0107967	6.48109	7.45414	6.79041	4.46569	5.0792	5.12624
ENSMUST00000040162.2	ENSMUSG00000038259	Gdf5	protein_coding	0.000300531	0.00925981	1.45166	0.401584	3.71184	0.7028	0.119575	-0.031321	0.12233	0.12233	0.190585	0.2019	0.272476	1.4399	0.76813	0.759363
ENSMUST00000010421.6	ENSMUSG00000010277	2610507B11Rik	protein_coding	0.00030076	0.00926081	0.257033	0.0711087	8.90835	0.0226423	0.000135573	0.00339259	0.00744909	0.00744909	22.5735	25.1938	25.4251	32.9045	30.4928	29.83
ENSMUST00000024860.8	ENSMUSG00000024065	Ehd3	protein_coding	0.000302072	0.00929515	-0.370616	0.102564	6.26892	0.0450229	0.00223613	0.00253389	0.0135429	0.0135429	4.63646	4.54425	5.01518	3.43712	3.25475	2.99766
ENSMUST00000100089.2	ENSMUSG00000075334	Rprm	protein_coding	0.00030443	0.00936089	-0.40156	0.111189	5.92401	0.0570968	0.00297603	0.00792613	0.0155685	0.0155685	10.1383	8.01247	8.61116	6.30023	5.37413	6.01347
ENSMUST00000008878.9	ENSMUSG00000008734	Gprc5b	protein_coding	0.000304604	0.00936089	0.385124	0.106643	6.17342	0.0574995	0.00298842	0.0132656	0.0140706	0.0140706	2.10932	2.64618	2.269	2.86392	3.78789	3.60212
ENSMUST00000026415.8	ENSMUSG00000025358	Cdk2	protein_coding	0.000305864	0.00938739	0.344695	0.095476	6.8657	0.0406217	0.0031263	0.00309526	0.0105472	0.0105472	9.62063	10.9323	11.5459	14.5024	14.4637	15.6651
ENSMUST00000109993.8	ENSMUSG00000020432	Tcn2	protein_coding	0.000305747	0.00938739	-0.647419	0.179322	6.02321	0.132391	0.0333015	-0.0249943	0.0149329	0.0149329	7.71706	7.8335	7.98166	3.50155	4.30408	4.38493
ENSMUST00000031670.9	ENSMUSG00000032766	Gng11	protein_coding	0.000306575	0.0094031	-0.681796	0.18888	7.35311	0.182265	0.000862143	0.0526513	0.00917481	0.0526513	90.7966	74.2845	70.3434	32.5586	32.7081	54.8805
ENSMUST00000141138.7	ENSMUSG00000030042	Pole4	processed_transcript	0.000307927	0.00943843	0.499205	0.13834	5.86891	0.0962501	0.0127474	0.014113	0.0159595	0.0159595	9.17953	14.0319	13.3984	18.0821	20.0993	19.9622
ENSMUST00000111303.1	ENSMUSG00000040479	Dgkz	protein_coding	0.000308333	0.00943862	-0.980048	0.271617	4.58287	0.30824	0.0713632	-0.0462487	0.0393006	0.0393006	1.07498	0.994373	0.766846	0.354549	0.40391	0.290093
ENSMUST00000009530.4	ENSMUSG00000001131	Timp1	protein_coding	0.000308263	0.00943862	0.299266	0.0829394	9.01382	0.0351228	0.000552738	0.00976567	0.00747372	0.00976567	297.417	260.633	312.165	415.345	349.518	389.022
ENSMUST00000177841.7	ENSMUSG00000045752	Tssc4	protein_coding	0.00030905	0.00945445	0.838412	0.232402	5.56717	0.223958	0.0620785	-0.0457311	0.0189374	0.0189374	2.95732	4.02334	3.13669	7.91361	8.25809	6.91186
ENSMUST00000066060.10	ENSMUSG00000048251	Bcl11b	protein_coding	0.000309816	0.00947174	0.828983	0.229829	4.34994	0.26955	0.028948	0.0502843	0.0496867	0.0502843	0.150369	0.1775	0.191204	0.537391	0.436127	0.258011
ENSMUST00000030993.7	ENSMUSG00000029111	Nelfa	protein_coding	0.000311344	0.0095123	0.369758	0.102549	6.97821	0.0536357	0.00118074	0.0145936	0.0101773	0.0145936	8.60641	10.2863	10.6647	16.0867	13.7829	12.5008
ENSMUST00000138730.1	ENSMUSG00000027656	Ccn5	processed_transcript	0.000312021	0.00952681	1.3232	0.367034	4.37037	0.686912	0.0378607	0.16421	0.0485874	0.16421	0.891154	1.28577	2.07541	6.83485	6.17096	2.9595
ENSMUST00000023210.7	ENSMUSG00000022551	Cyc1	protein_coding	0.000312405	0.00953239	0.384541	0.106675	8.80155	0.0580169	0.000455261	0.016614	0.00744179	0.016614	127.368	103.904	90.8329	151.195	140.725	171.938
ENSMUST00000195014.5	ENSMUSG00000041355	Ssr2	protein_coding	0.000313035	0.00954545	0.276965	0.0768437	9.05187	0.0300989	0.000135876	0.00872156	0.0074869	0.00872156	213.784	202.924	236.648	310.819	268.354	271.111
ENSMUST00000028735.7	ENSMUSG00000027276	Jag1	protein_coding	0.000313817	0.00955929	-0.481487	0.133612	7.11419	0.0909715	0.000962009	0.0258163	0.00978314	0.0258163	6.69136	9.85191	7.47906	5.03413	5.38721	4.12777
ENSMUST00000168093.8	ENSMUSG00000041187	Prkd2	protein_coding	0.000313894	0.00955929	0.422612	0.117277	6.41052	0.0700849	0.00734857	0.0132821	0.0127313	0.0132821	4.09652	3.3704	4.40611	6.85972	5.43295	5.60034
ENSMUST00000178977.8	ENSMUSG00000031938	4931406C07Rik	protein_coding	0.00031446	0.00957036	-0.591961	0.164293	6.31582	0.137516	0.0237103	0.0167779	0.0132805	0.0167779	9.15412	8.87982	8.16789	3.4395	5.75244	5.41895
ENSMUST00000074976.7	ENSMUSG00000063954	H2ac19	protein_coding	0.000314673	0.00957069	-0.742163	0.20599	5.70426	0.21616	0.0202562	0.0433915	0.0173683	0.0433915	44.5804	33.4486	21.2105	15.206	16.3929	12.8164
ENSMUST00000217317.1	ENSMUSG00000032518	Rpsa	protein_coding	0.000316478	0.00961938	0.312698	0.0868261	9.96874	0.0383805	0.000275925	0.0110322	0.00855378	0.0110322	359.732	302.027	340.578	509.067	413.046	431.676
ENSMUST00000027777.11	ENSMUSG00000026496	Parp1	protein_coding	0.00031984	0.00971531	0.303077	0.084219	8.35468	0.0360681	0.000239697	0.0103996	0.00760248	0.0103996	23.7297	25.0762	28.1278	38.4394	33.4013	31.2367
ENSMUST00000027186.11	ENSMUSG00000026028	Trak2	protein_coding	0.000322417	0.00978729	-0.289685	0.0805445	7.48251	0.0297674	0.000863416	0.00487672	0.0088677	0.0088677	9.20694	10.5482	9.16911	6.42453	7.58445	7.34797
ENSMUST00000040873.11	ENSMUSG00000037364	Srrt	protein_coding	0.000323023	0.0097994	0.334322	0.0929678	7.93774	0.0428495	0.00492518	0.00672263	0.00803933	0.00803933	20.856	18.8721	22.2619	32.3064	26.4093	27.23
ENSMUST00000099538.5	ENSMUSG00000020265	Sumo3	protein_coding	0.000323326	0.0098023	0.31848	0.0885687	8.44184	0.0398422	0.000445296	0.0113213	0.00754677	0.0113213	71.1253	54.0668	64.3468	90.48	82.5839	83.6976
ENSMUST00000044369.12	ENSMUSG00000033793	Atp6v1h	protein_coding	0.000324571	0.00983372	-0.286417	0.0796742	7.84756	0.0294629	0.00134928	0.00471623	0.00817268	0.00817268	53.5308	48.8352	48.4564	33.3268	39.8321	38.4055
ENSMUST00000023235.12	ENSMUSG00000055762	Eef1d	protein_coding	0.000324787	0.00983396	0.277771	0.0772727	8.28567	0.0235946	0.00130147	-0.000741976	0.00765514	0.00765514	138.339	134.833	127.046	178.939	168.681	174.125
ENSMUST00000110375.8	ENSMUSG00000027367	Stard7	protein_coding	0.000326428	0.00987731	0.447355	0.124494	7.07797	0.0786365	0.00186295	0.0213854	0.00988354	0.0213854	9.7558	10.0816	6.85828	12.4477	14.7322	13.6269
ENSMUST00000092915.11	ENSMUSG00000020741	Cluh	protein_coding	0.000326745	0.00988058	0.256909	0.0715002	8.72627	0.0228665	0.000221194	0.00361113	0.00744723	0.00744723	25.1705	26.2119	26.4913	33.9073	30.6272	35.1903
ENSMUST00000127306.1	ENSMUSG00000028445	Enho	protein_coding	0.000327393	0.00988121	-0.663587	0.184709	5.42453	0.173046	0.00445504	0.0467213	0.0210403	0.0467213	8.57558	5.45753	6.19919	2.69301	3.32037	4.23572
ENSMUST00000106023.7	ENSMUSG00000025498	Irf7	protein_coding	0.000327321	0.00988121	1.99894	0.556396	3.65383	1.26831	0.330326	-0.243348	0.134038	0.134038	0.202334	0.155069	0.143046	1.39854	1.69902	0.806739
ENSMUST00000039271.6	ENSMUSG00000060301	2610008E11Rik	protein_coding	0.00032717	0.00988121	-0.670441	0.186608	5.7143	0.176634	0.00305738	0.0491763	0.0172695	0.0491763	3.26658	3.67125	3.21557	1.17053	2.05076	2.0382
ENSMUST00000005015.9	ENSMUSG00000004895	Prcc	protein_coding	0.000328292	0.00990202	0.276883	0.0770856	7.68845	0.0274034	0.000469225	0.00503598	0.00844405	0.00844405	26.065	23.4739	24.779	35.4866	30.111	31.511
ENSMUST00000045593.11	ENSMUSG00000039206	Daglb	protein_coding	0.000329027	0.00991578	0.41306	0.115017	5.94336	0.0563676	0.00440489	0.00207272	0.0154384	0.0154384	1.81115	1.92662	1.74516	3.07915	2.62599	2.50579
ENSMUST00000084881.4	ENSMUSG00000032431	Crtap	protein_coding	0.000329318	0.00991578	0.262017	0.0729634	8.2258	0.0256005	0.000278496	0.00597733	0.007707	0.007707	59.7204	54.962	51.3004	78.0968	70.1354	65.6292
ENSMUST00000096240.2	ENSMUSG00000071646	Mta2	protein_coding	0.000329378	0.00991578	0.256189	0.0713413	8.96812	0.0205927	0.000173461	0.000955197	0.00746092	0.00746092	61.8951	60.5537	58.844	80.6257	74.2686	76.5323
ENSMUST00000075671.4	ENSMUSG00000030722	Nfatc2ip	protein_coding	0.000332635	0.0100074	0.545094	0.151902	5.02584	0.0905945	0.00688777	-0.00506752	0.0277235	0.0277235	0.944703	1.07997	0.976645	1.70604	1.72973	1.67903
ENSMUST00000032809.9	ENSMUSG00000030588	Yif1b	protein_coding	0.000334472	0.0100549	0.506083	0.141087	7.01847	0.100723	0.00924817	0.0206102	0.0100554	0.0206102	18.8609	20.9795	28.6492	38.8057	35.4743	35.7137
ENSMUST00000046633.9	ENSMUSG00000041935	AW549877	protein_coding	0.000334638	0.0100549	-0.46702	0.130202	6.21353	0.0857753	0.00236967	0.0230591	0.013849	0.0230591	4.23452	4.63004	3.88172	2.07698	3.213	2.66259
ENSMUST00000004203.5	ENSMUSG00000004100	Ppan	protein_coding	0.000335183	0.0100649	0.272306	0.0759259	7.81164	0.0254764	0.000417266	0.00362167	0.00822986	0.00822986	34.2048	34.1646	37.0208	48.4707	43.2952	45.2436
ENSMUST00000087956.5	ENSMUSG00000079487	Med12	protein_coding	0.00033697	0.0101121	5.3425	1.4902	1.99261	8.59759	2.54222	-2.49862	0.788838	0.788838	0	2.96001e-09	8.79495e-05	0.380845	0.587536	0.329205
ENSMUST00000079205.13	ENSMUSG00000032997	Chpf	protein_coding	0.000338261	0.0101444	0.304422	0.0849371	7.80521	0.036459	0.00218498	0.00863648	0.00824034	0.00863648	18.4965	18.7988	16.763	28.2524	21.6265	22.9883
ENSMUST00000105691.7	ENSMUSG00000039953	Clstn1	protein_coding	0.000340787	0.0102088	0.636501	0.177687	7.31196	0.159427	0.00251647	0.0448427	0.0092751	0.0448427	5.37012	6.22974	6.87025	15.3896	11.054	8.90347
ENSMUST00000033846.6	ENSMUSG00000031465	Angpt2	protein_coding	0.000341058	0.0102088	-0.443642	0.123855	5.64365	0.0705449	0.00500226	0.00937202	0.018008	0.018008	2.41576	3.28335	3.05013	1.82305	1.99742	1.68158
ENSMUST00000102500.4	ENSMUSG00000049396	Gemin4	protein_coding	0.00034094	0.0102088	0.365146	0.101938	7.35032	0.0416365	0.00640559	-0.00435935	0.00918156	0.00918156	9.82334	10.2714	10.0462	13.9165	13.7112	15.1997
ENSMUST00000082237.6	ENSMUSG00000057706	Mex3b	protein_coding	0.000341703	0.0102152	0.408568	0.114079	6.22329	0.0656953	0.0027712	0.0167499	0.0137952	0.0167499	2.99471	4.31194	3.19267	4.96478	5.64619	4.86825
ENSMUST00000058265.7	ENSMUSG00000048970	C1galt1c1	protein_coding	0.00034164	0.0102152	-0.493886	0.137899	5.70023	0.0959964	0.00411498	0.0244094	0.0174085	0.0244094	10.8433	9.81502	8.97196	4.63639	6.99419	6.3499
ENSMUST00000090986.10	ENSMUSG00000015852	Fcrls	protein_coding	0.000342003	0.0102177	0.610523	0.170479	5.77798	0.146698	0.00420455	0.0393903	0.0166856	0.0393903	2.75101	2.6658	4.19694	5.38744	6.65021	5.14884
ENSMUST00000059018.13	ENSMUSG00000052934	Fbxo31	protein_coding	0.000343161	0.0102458	0.340741	0.0951702	6.66233	0.0400388	0.00222613	0.00428326	0.0113599	0.0113599	3.92451	3.56794	3.86804	5.5103	4.75124	5.57381
ENSMUST00000059331.8	ENSMUSG00000048481	Mypop	protein_coding	0.000343884	0.0102609	0.528725	0.147698	6.11277	0.0901831	0.018312	-0.0104142	0.0144098	0.0144098	4.16423	3.79691	3.82065	6.14001	6.26324	7.57026
ENSMUST00000055698.7	ENSMUSG00000046352	Gjb2	protein_coding	0.000344207	0.0102641	0.841538	0.235097	7.39304	0.27878	0.00104903	0.0818569	0.00907831	0.0818569	8.46485	17.2975	16.0661	33.0297	31.6869	27.1951
ENSMUST00000020643.3	ENSMUSG00000020375	Rufy1	protein_coding	0.000344874	0.0102775	0.326108	0.0911163	6.75143	0.0328918	0.00147606	-0.000241255	0.0109772	0.0109772	7.53849	7.26045	7.68452	9.96481	10.4137	10.3619
ENSMUST00000035577.6	ENSMUSG00000042501	Cpa6	protein_coding	0.000345821	0.0102992	-0.651361	0.18203	4.78774	0.137433	0.0166682	-0.00397873	0.0330343	0.0330343	3.03485	2.43199	3.00942	1.3295	1.57121	1.42855
ENSMUST00000236130.1	ENSMUSG00000024940	Ltbp3	protein_coding	0.000346403	0.01031	0.789051	0.220536	4.955	0.245144	0.0371144	0.0358401	0.0291456	0.0358401	2.20169	2.41892	1.2708	5.25524	3.61342	3.68292
ENSMUST00000079817.7	ENSMUSG00000063410	Stk24	protein_coding	0.000348386	0.0103625	0.269098	0.0752431	7.92333	0.0264563	0.000432605	0.0054827	0.00805967	0.00805967	22.7296	25.8924	26.5509	34.7054	32.1599	30.5656
ENSMUST00000162372.7	ENSMUSG00000029221	Slc30a9	protein_coding	0.00034918	0.0103796	-0.569757	0.159338	5.79532	0.127853	0.0135311	0.0245516	0.0165382	0.0245516	2.46177	2.64153	2.02142	0.99219	1.59001	1.43649
ENSMUST00000169357.1	ENSMUSG00000092118	Fancf	protein_coding	0.000349931	0.0103865	0.483672	0.135285	5.32287	0.0734758	0.00483536	-0.000717706	0.0226175	0.0226175	3.1343	2.75926	2.6128	4.64655	4.39025	4.56595
ENSMUST00000232100.1	ENSMUSG00000022807	Osbpl11	protein_coding	0.000350073	0.0103865	-4.21752	1.17969	3.28163	5.75721	1.85489	-1.32869	0.232612	0.232612	1.78342	2.06411	0.726421	0.00704032	0.0121151	0.0503313
ENSMUST00000232181.1	ENSMUSG00000022807	Osbpl11	protein_coding	0.000350073	0.0103865	-4.21752	1.17969	3.28163	5.75721	1.85489	-1.32869	0.232612	0.232612	1.78342	2.06411	0.726421	0.00704032	0.0121151	0.0503313
ENSMUST00000142716.2	ENSMUSG00000029761	Cald1	protein_coding	0.000350544	0.0103874	-0.649204	0.181608	5.9989	0.166017	0.00728519	0.0421867	0.015082	0.0421867	15.9767	23.6549	27.8007	10.8606	10.9936	12.1101
ENSMUST00000152147.7	ENSMUSG00000073155	1810058I24Rik	protein_coding	0.000350763	0.0103874	-0.319658	0.0894247	6.92798	0.0394357	0.00165843	0.00931832	0.0103367	0.0103367	14.8231	12.6582	16.2554	10.8381	9.98224	10.4246
ENSMUST00000034928.11	ENSMUSG00000032366	Tpm1	protein_coding	0.000350366	0.0103874	-0.686641	0.192073	8.01783	0.185713	0.0241515	0.0311865	0.00793285	0.0311865	87.4789	51.5062	76.0728	36.2281	28.9013	39.8496
ENSMUST00000026599.9	ENSMUSG00000025525	Apool	protein_coding	0.000352058	0.0104192	-0.398379	0.111477	6.00579	0.0625244	0.00279532	0.0158455	0.0150393	0.0158455	14.9236	13.8061	13.3884	7.41641	10.4774	10.1035
ENSMUST00000036742.13	ENSMUSG00000039208	Metrnl	protein_coding	0.000355628	0.0105183	0.632244	0.17705	7.22286	0.157535	0.00283563	0.0441843	0.00949724	0.0441843	25.4036	22.7465	14.2207	34.0111	37.108	42.0641
ENSMUST00000110602.8	ENSMUSG00000027242	Wdr76	protein_coding	0.000357235	0.0105461	0.61246	0.171566	5.03816	0.134102	0.0166654	0.0102973	0.027487	0.027487	0.708638	0.808242	1.05458	1.52315	1.74998	1.37638
ENSMUST00000005431.5	ENSMUSG00000005299	Letm1	protein_coding	0.000357081	0.0105461	0.278747	0.0780821	7.68296	0.0272556	0.000690959	0.00424109	0.00845425	0.00845425	9.84507	9.70818	9.70677	14.1959	12.0024	12.048
ENSMUST00000219316.1	ENSMUSG00000021114	Atp6v1d	retained_intron	0.000357236	0.0105461	-0.403043	0.112903	6.37924	0.0640297	0.00303256	0.0160881	0.0129164	0.0160881	45.5838	33.6184	37.3458	22.1006	27.0335	26.7163
ENSMUST00000031080.14	ENSMUSG00000029185	Fam114a1	protein_coding	0.000362985	0.0107024	-0.258556	0.0725134	8.36576	0.0231486	0.00029256	0.003574	0.00759474	0.00759474	49.3751	49.5183	50.8942	34.7425	41.1289	38.5192
ENSMUST00000022458.10	ENSMUSG00000021901	Bap1	protein_coding	0.000362853	0.0107024	0.267254	0.074951	7.98834	0.0267538	0.0004557	0.00620217	0.00797077	0.00797077	21.3446	18.0217	20.5466	27.15	24.375	25.6463
ENSMUST00000025075.2	ENSMUSG00000024232	Bambi	protein_coding	0.00036321	0.0107024	0.340891	0.0956091	6.54904	0.0357359	0.00179144	-0.00069911	0.0119202	0.0119202	3.79677	3.69353	3.4598	5.01125	5.18092	4.96776
ENSMUST00000035157.9	ENSMUSG00000032553	Srprb	protein_coding	0.00036397	0.0107181	0.256615	0.0719834	8.46236	0.0234506	0.000237036	0.00438193	0.00753539	0.00753539	39.8257	35.5409	37.9176	51.6968	45.6089	47.2854
ENSMUST00000079970.5	ENSMUSG00000063802	Hspbp1	protein_coding	0.000365321	0.0107511	0.291291	0.0817328	7.55886	0.0334714	0.00103739	0.00898297	0.00870072	0.00898297	30.2725	24.6831	27.9911	38.3868	32.9522	38.0729
ENSMUST00000102637.7	ENSMUSG00000027889	Ampd2	protein_coding	0.000365796	0.0107584	0.685445	0.192346	6.44155	0.185347	0.0304204	0.025075	0.0125432	0.025075	4.06702	2.29802	3.45046	6.76906	5.3235	6.78441
ENSMUST00000155672.7	ENSMUSG00000041769	Ppp2r2d	protein_coding	0.000366096	0.0107605	0.301506	0.0846121	7.38471	0.0311347	0.00164042	0.00318828	0.00909839	0.00909839	22.4328	22.0342	25.3441	32.061	30.0124	30.7405
ENSMUST00000137868.7	ENSMUSG00000026207	Speg	protein_coding	0.000366359	0.0107616	-0.391187	0.109785	6.36744	0.0603715	0.0028536	0.0152256	0.0129852	0.0152256	1.8716	1.85274	1.36893	1.22983	0.996871	1.16249
ENSMUST00000063040.11	ENSMUSG00000050608	Micos10	processed_transcript	0.000366975	0.010773	-0.320094	0.0898443	7.18633	0.0371524	0.00251686	0.00550115	0.00959114	0.00959114	203.672	181.395	203.38	129.207	138.124	152.193
ENSMUST00000049032.12	ENSMUSG00000038705	Gmeb2	protein_coding	0.000369447	0.0108253	0.323266	0.0907797	6.79164	0.0327196	0.00154267	0.000168853	0.0108188	0.0108188	5.16137	5.03764	4.84742	7.2438	6.61947	6.66833
ENSMUST00000048698.13	ENSMUSG00000036980	Taf6	protein_coding	0.000369265	0.0108253	0.320264	0.0899334	7.30108	0.0404764	0.0019479	0.0101841	0.00930179	0.0101841	15.421	12.9832	16.3211	21.0946	18.5321	21.082
ENSMUST00000004913.6	ENSMUSG00000004791	Pgf	protein_coding	0.000369045	0.0108253	-0.425974	0.119613	5.69214	0.069552	0.00397062	0.0149241	0.0174901	0.0174901	7.93044	5.74901	5.91655	4.65037	4.02842	3.89177
ENSMUST00000049271.12	ENSMUSG00000037466	Tedc1	protein_coding	0.000370576	0.0108517	0.7373	0.207095	5.29124	0.181009	0.041214	-0.0188063	0.0231186	0.0231186	1.23075	1.86008	1.34515	2.90449	3.18782	2.91836
ENSMUST00000112551.3	ENSMUSG00000025283	Sat1	protein_coding	0.000372026	0.0108874	-1.08199	0.304	4.69463	0.36707	0.102992	-0.0831654	0.0356316	0.0356316	9.46205	8.268	6.46912	2.86903	2.39929	2.69344
ENSMUST00000016401.14	ENSMUSG00000016257	Prelid3b	protein_coding	0.000372379	0.010891	-0.290913	0.0817418	7.61062	0.0334071	0.000829794	0.00919278	0.00859424	0.00919278	47.8504	48.4562	51.3366	31.1196	38.6941	39.4721
ENSMUST00000176630.7	ENSMUSG00000024613	Tcof1	protein_coding	0.000373674	0.0109221	0.606929	0.170581	7.44404	0.145426	0.0182621	0.0253846	0.00895641	0.0253846	5.5508	6.82386	8.43231	15.1188	12.1691	10.3574
ENSMUST00000027404.11	ENSMUSG00000026204	Ptprn	protein_coding	0.00037557	0.0109707	0.263841	0.0741819	8.06103	0.0264604	0.000374443	0.00659643	0.00787999	0.00787999	17.8359	20.0021	20.4064	27.3372	23.6956	24.1706
ENSMUST00000022701.6	ENSMUSG00000022105	Rb1	protein_coding	0.000376414	0.0109886	-0.686919	0.193167	5.87127	0.186334	0.00312432	0.0528459	0.015942	0.0528459	3.24715	4.36647	3.34272	1.26597	2.26691	1.9929
ENSMUST00000025101.9	ENSMUSG00000024253	Dync2li1	protein_coding	0.000377055	0.0110005	-0.420496	0.118262	5.73374	0.0662513	0.00389497	0.0126128	0.0170837	0.0170837	10.7559	8.22339	8.79096	5.36044	5.8973	6.65906
ENSMUST00000028981.8	ENSMUSG00000027479	Mapre1	protein_coding	0.00037742	0.0110044	-0.253536	0.0713103	9.07317	0.025288	0.000132461	0.00737239	0.00749527	0.00749527	44.4585	40.9874	41.8551	28.3461	35.1492	34.1951
ENSMUST00000199202.4	ENSMUSG00000028034	Fubp1	protein_coding	0.00037793	0.0110124	0.479839	0.134974	5.70231	0.0806889	0.00993948	0.00457971	0.0173876	0.0173876	9.1399	8.6331	7.01309	11.4506	13.7724	14.2521
ENSMUST00000028487.9	ENSMUSG00000027082	Tfpi	protein_coding	0.000378249	0.0110149	-0.536739	0.15099	5.55096	0.100597	0.0150423	0.00266992	0.0191545	0.0191545	7.52742	7.54724	8.1775	3.62144	4.8751	5.03427
ENSMUST00000109605.4	ENSMUSG00000042406	Atf4	protein_coding	0.000378985	0.0110295	0.25466	0.0716484	9.05143	0.0256157	0.000167967	0.00753228	0.00748673	0.00753228	113.087	129.437	133.337	169.883	158.695	150.445
ENSMUST00000078074.8	ENSMUSG00000064289	Tank	protein_coding	0.000380218	0.0110518	-3.75576	1.05693	2.63895	5.39506	1.21382	0.240367	0.461845	0.461845	1.8957	2.51995	0.891725	0	0.209047	0.0190811
ENSMUST00000135688.1	ENSMUSG00000024575	Pde6a	protein_coding	0.000380148	0.0110518	-0.606586	0.170701	5.64389	0.145351	0.0045121	0.0391963	0.0180053	0.0391963	4.54511	5.12033	5.74721	3.60764	2.7401	2.10382
ENSMUST00000034215.7	ENSMUSG00000031765	Mt1	protein_coding	0.000380895	0.0110647	-0.277804	0.0781891	7.60295	0.0297116	0.000560627	0.00763812	0.00860969	0.00860969	167.321	149.301	158.016	116.261	105.189	132.38
ENSMUST00000105784.7	ENSMUSG00000006219	Fblim1	protein_coding	0.000381401	0.0110726	-0.262082	0.0737713	8.31849	0.0256841	0.000534153	0.00581331	0.00762915	0.00762915	43.5418	41.3362	40.6163	28.8945	31.2944	35.7354
ENSMUST00000022197.14	ENSMUSG00000021687	Scamp1	protein_coding	0.000382059	0.0110849	-0.428965	0.120761	6.42324	0.0727031	0.00277533	0.0190995	0.0126548	0.0190995	5.31888	6.82123	4.91698	3.08958	4.09467	3.73999
ENSMUST00000060608.12	ENSMUSG00000049439	Cyp20a1	protein_coding	0.000382316	0.0110855	0.299382	0.0842854	7.24615	0.0291335	0.00121769	0.00158823	0.00943834	0.00943834	17.4692	17.5669	16.7728	21.6336	24.9447	22.3161
ENSMUST00000179869.2	ENSMUSG00000093930	Hmgcs1	protein_coding	0.000385536	0.0111664	-0.550572	0.1551	7.65286	0.119806	0.00167746	0.0344065	0.00851128	0.0344065	21.8886	34.4247	29.4274	13.6316	18.7387	15.7787
ENSMUST00000046869.10	ENSMUSG00000040913	Fbxw4	protein_coding	0.000385578	0.0111664	0.381827	0.107564	6.11263	0.0576217	0.00287656	0.0144785	0.0144106	0.0144785	5.59379	4.6142	3.96389	7.578	6.45877	6.34162
ENSMUST00000080812.13	ENSMUSG00000039130	Zc3hc1	protein_coding	0.000385818	0.0111665	0.300998	0.0847977	7.60145	0.0358087	0.000666276	0.0101197	0.00861272	0.0101197	31.2869	24.8828	27.0026	35.6947	34.323	40.2439
ENSMUST00000002885.7	ENSMUSG00000002808	Epdr1	protein_coding	0.000386425	0.0111772	0.368085	0.10371	6.25208	0.0535528	0.00247945	0.0136541	0.0136362	0.0136541	4.95579	5.8651	5.63215	8.84943	8.24241	6.52554
ENSMUST00000142512.7	ENSMUSG00000029761	Cald1	protein_coding	0.000387162	0.0111917	-0.319787	0.0901142	7.26956	0.0358031	0.00280107	0.00360392	0.00937979	0.00937979	57.8046	61.5129	67.8587	47.3729	43.3123	42.7791
ENSMUST00000108817.4	ENSMUSG00000078851	H2aw	protein_coding	0.000391178	0.0113009	-0.423793	0.119514	6.75676	0.0710204	0.00124072	0.0201847	0.0109557	0.0201847	19.699	13.832	14.9873	11.0824	9.64689	10.1843
ENSMUST00000032936.7	ENSMUSG00000030697	Ppp4c	protein_coding	0.000391688	0.0113087	0.271401	0.0765453	8.50579	0.0291285	0.000317404	0.00847137	0.00751346	0.00847137	103.673	87.4151	89.2715	131.666	109.379	122.14
ENSMUST00000115096.3	ENSMUSG00000029765	Plxna4	protein_coding	0.000392917	0.0113303	-0.414602	0.116961	5.74318	0.0587038	0.00352373	0.00539558	0.016996	0.016996	0.800949	0.838566	0.748684	0.589242	0.520058	0.456588
ENSMUST00000032183.5	ENSMUSG00000030095	Tmem43	protein_coding	0.000392679	0.0113303	0.254726	0.0718559	8.47886	0.0243167	0.000218202	0.00584568	0.00752671	0.00752671	40.4033	41.8413	41.8014	58.8554	52.4653	47.4725
ENSMUST00000051390.8	ENSMUSG00000049600	Zbtb45	protein_coding	0.000394936	0.0113816	0.381077	0.107544	6.25994	0.0505294	0.00375592	0.00494858	0.0135927	0.0135927	5.4867	5.51336	4.3446	7.6939	6.85041	7.63019
ENSMUST00000023259.14	ENSMUSG00000022594	Lynx1	protein_coding	0.000396378	0.0114162	-0.404272	0.114121	7.13041	0.0646591	0.000845499	0.0186899	0.00973912	0.0186899	11.305	8.09501	10.0136	7.02764	5.92363	6.34043
ENSMUST00000036509.13	ENSMUSG00000036352	Ubac1	protein_coding	0.000396722	0.0114191	0.282312	0.0796983	7.5839	0.0256926	0.000879179	0.00134905	0.00864856	0.00864856	26.0346	26.4862	25.9988	36.6735	32.6729	33.2282
ENSMUST00000222091.1	ENSMUSG00000050244	Heatr1	nonsense_mediated_decay	0.000397737	0.0114344	1.07667	0.304009	5.57835	0.458674	0.0194261	0.119206	0.0187921	0.119206	2.56741	1.51203	1.57185	8.40688	4.88308	3.5929
ENSMUST00000042664.9	ENSMUSG00000033965	Slc16a2	protein_coding	0.000397691	0.0114344	0.447757	0.126427	5.60422	0.0793264	0.00527395	0.0187019	0.0184686	0.0187019	1.1495	1.61935	1.49852	2.42469	2.23437	1.91611
ENSMUST00000071718.11	ENSMUSG00000026701	Prdx6	protein_coding	0.00039877	0.0114363	-0.271623	0.0767102	8.16112	0.0256188	0.00105712	0.00329922	0.00776956	0.00776956	55.2247	48.4895	51.3218	40.2366	36.6813	39.7975
ENSMUST00000041623.8	ENSMUSG00000041773	Enc1	protein_coding	0.000398368	0.0114363	-0.2607	0.0736199	8.14769	0.0218338	0.000346428	0.00145912	0.00778341	0.00778341	22.2897	24.9491	21.5727	17.2454	17.6709	17.4348
ENSMUST00000096482.9	ENSMUSG00000054115	Skp2	protein_coding	0.000398289	0.0114363	0.318209	0.0898587	6.78422	0.039192	0.0012645	0.00975409	0.0108474	0.0108474	6.43931	8.55629	8.17279	10.2259	10.4657	10.4034
ENSMUST00000073570.11	ENSMUSG00000073423	Zfp414	protein_coding	0.0003987	0.0114363	0.563286	0.159078	5.66363	0.121398	0.0201702	0.0125927	0.0177884	0.0177884	4.89438	4.34637	5.8384	10.6497	7.36836	8.36199
ENSMUST00000210139.1	ENSMUSG00000003423	Pih1d1	protein_coding	0.00040173	0.0115141	0.330039	0.0932592	7.10199	0.0429254	0.00322928	0.00958032	0.00981664	0.00981664	33.5523	25.2032	27.7889	42.255	36.9744	38.6577
ENSMUST00000016678.13	ENSMUSG00000016534	Lamp2	protein_coding	0.000402366	0.0115254	-0.342982	0.0969279	7.33424	0.046565	0.00109775	0.0129948	0.00922066	0.0129948	39.4532	36.7684	34.3202	21.5092	28.9845	27.0435
ENSMUST00000174759.7	ENSMUSG00000028073	Pear1	protein_coding	0.000403683	0.0115561	0.334436	0.0945359	7.02881	0.0393696	0.00338069	0.00388841	0.0100249	0.0100249	6.23774	6.7665	6.56634	9.91161	8.0411	9.20243
ENSMUST00000070039.13	ENSMUSG00000056121	Fez2	protein_coding	0.000404	0.0115582	-0.259282	0.0732961	8.25953	0.0244938	0.000381413	0.00502566	0.00767707	0.00767707	73.5414	65.7014	59.8933	49.854	49.194	52.5885
ENSMUST00000081790.14	ENSMUSG00000033417	Cacul1	protein_coding	0.000404693	0.011571	-0.318712	0.0901079	7.53517	0.0402165	0.0013511	0.010828	0.00875127	0.010828	12.3172	13.7124	10.283	7.96427	9.4647	8.49811
ENSMUST00000115606.7	ENSMUSG00000075704	Txnrd2	protein_coding	0.000405127	0.0115764	0.460122	0.130099	5.8054	0.072404	0.00893387	0.00217895	0.0164546	0.0164546	4.01116	3.75171	3.89277	7.09002	5.36166	5.89536
ENSMUST00000046644.6	ENSMUSG00000042043	Tbca	protein_coding	0.000405528	0.0115809	-0.322684	0.0912448	7.7944	0.0412282	0.00040969	0.0120787	0.00825814	0.0120787	219.192	203.188	233.836	134.647	162.616	172.064
ENSMUST00000199195.2	ENSMUSG00000010406	Mrpl52	protein_coding	0.000406486	0.0116012	-0.520783	0.147287	5.38015	0.101058	0.0108164	0.0138009	0.0217238	0.0217238	34.1155	24.3303	24.4619	16.2494	13.8683	17.9612
ENSMUST00000006912.11	ENSMUSG00000026737	Pip4k2a	protein_coding	0.000407641	0.0116271	-0.318806	0.0901833	6.74185	0.0347276	0.00118335	0.00411226	0.0110162	0.0110162	8.08459	9.8523	8.31104	6.0347	6.62016	6.11221
ENSMUST00000227997.1	ENSMUSG00000091243	Vgll3	protein_coding	0.000408785	0.0116527	-0.477005	0.134963	5.8396	0.0751467	0.0111409	-0.00253259	0.0161814	0.0161814	8.69788	10.8933	9.83801	5.60667	6.36673	5.94846
ENSMUST00000027151.11	ENSMUSG00000061816	Myl1	protein_coding	0.000409544	0.0116673	-3.49806	0.98987	2.36306	4.56578	0.879634	0.23894	0.59013	0.59013	3.19623	1.48493	1.3304	2.31222e-07	0.030284	0.236676
ENSMUST00000082092.4	ENSMUSG00000057322	Rpl38	protein_coding	0.000410822	0.0116967	0.370477	0.104861	6.71105	0.047814	0.00534878	0.0029487	0.0111449	0.0111449	117.786	99.076	109.946	165.594	148.036	153.389
ENSMUST00000049509.6	ENSMUSG00000046844	Vat1l	protein_coding	0.000411422	0.0117067	0.477151	0.135069	5.37826	0.0842592	0.00561232	0.0143344	0.0217531	0.0217531	1.10618	1.31973	1.49303	2.11943	2.30871	1.81287
ENSMUST00000061552.14	ENSMUSG00000074305	Peak1	protein_coding	0.00041272	0.0117366	-0.666164	0.188618	6.83934	0.175825	0.00143229	0.0519329	0.0106411	0.0519329	3.70334	6.50236	5.41012	2.25996	3.11938	2.40432
ENSMUST00000006956.8	ENSMUSG00000040026	Saa3	protein_coding	0.00041312	0.0117399	3.05022	0.863705	1.5384	3.49137	0.050995	0.824267	1.06798	1.06798	0	0	0.250967	1.95567	1.95329	0.795561
ENSMUST00000064477.13	ENSMUSG00000022770	Dlg1	protein_coding	0.000413337	0.0117399	-0.330369	0.0935513	7.59739	0.0432453	0.0013318	0.011796	0.00862096	0.011796	14.1524	17.3763	15.2319	9.47758	12.4079	11.3822
ENSMUST00000020846.7	ENSMUSG00000020538	Srebf1	protein_coding	0.000414327	0.011761	0.305472	0.0865168	7.45712	0.0341572	0.00230183	0.00540216	0.0089259	0.0089259	8.37942	9.02149	8.60281	13.2818	10.7118	10.9663
ENSMUST00000068140.5	ENSMUSG00000054871	Tmem158	protein_coding	0.000414895	0.0117701	0.783545	0.221941	4.25951	0.20431	0.0187821	0.00637695	0.0551045	0.0551045	0.872073	0.762496	0.687075	2.12008	1.49078	1.50229
ENSMUST00000029955.4	ENSMUSG00000028287	1700009N14Rik	protein_coding	0.000416153	0.0117916	-0.542329	0.153651	5.64195	0.116566	0.00375122	0.0316616	0.018027	0.0316616	11.581	7.81922	8.74688	5.01575	4.71262	6.3754
ENSMUST00000101295.8	ENSMUSG00000069892	9930111J21Rik2	protein_coding	0.000415947	0.0117916	-0.861321	0.244017	5.24897	0.294015	0.0062996	0.083017	0.0237992	0.083017	1.53977	1.95234	1.18779	0.42105	0.777261	0.781623
ENSMUST00000093552.11	ENSMUSG00000002984	Tomm40	protein_coding	0.000417029	0.0118093	0.255538	0.0724094	8.65163	0.025274	0.000403433	0.00670176	0.00746125	0.00746125	92.0212	84.2247	81.3729	119.626	97.1992	112.122
ENSMUST00000045855.8	ENSMUSG00000042770	Hebp1	protein_coding	0.000417751	0.0118227	-0.350915	0.0994485	6.52194	0.0488104	0.0015824	0.0132526	0.0120683	0.0132526	27.4658	21.3215	23.9012	18.5522	14.9778	17.1632
ENSMUST00000099349.9	ENSMUSG00000074793	Hspa12b	protein_coding	0.000421859	0.0119318	0.375968	0.106627	6.24341	0.0519309	0.00336972	0.008537	0.0136842	0.0136842	2.94843	3.34858	3.31578	5.36812	4.23843	4.31212
ENSMUST00000115733.2	ENSMUSG00000041624	Gucy1a2	protein_coding	0.000422585	0.0119452	-0.937609	0.265946	3.96701	0.303246	0.0239942	0.0253966	0.0820966	0.0820966	1.47425	1.37836	0.82427	0.47039	0.4296	0.462374
ENSMUST00000003044.13	ENSMUSG00000002963	Pnkp	protein_coding	0.000423474	0.0119554	0.407618	0.115636	6.55141	0.0604535	0.00815002	0.00510973	0.0119076	0.0119076	7.09498	6.51563	7.10066	10.3559	8.80019	11.7642
ENSMUST00000098371.8	ENSMUSG00000025790	Slco3a1	protein_coding	0.000423706	0.0119554	-0.421215	0.119498	6.14163	0.0703624	0.00457846	0.0168413	0.0142474	0.0168413	5.89235	5.58268	5.28917	4.48592	3.53374	3.00172
ENSMUST00000002198.3	ENSMUSG00000002129	Sf3a1	protein_coding	0.000423418	0.0119554	0.295236	0.083754	8.58966	0.034567	0.000203132	0.010319	0.00747942	0.010319	23.5061	27.1325	29.2994	38.5873	33.8262	33.4162
ENSMUST00000022746.12	ENSMUSG00000022146	Osmr	protein_coding	0.000425159	0.0119892	0.656155	0.186199	7.01393	0.170766	0.00134137	0.0506635	0.0100689	0.0506635	3.01693	5.3082	4.75997	8.21761	9.30432	6.86283
ENSMUST00000111194.7	ENSMUSG00000005087	Cd44	protein_coding	0.000427326	0.0120382	0.322896	0.0916641	9.36687	0.0413614	0.000288624	0.0123148	0.00768562	0.0123148	51.8232	69.1114	60.8718	88.6839	81.9647	75.4198
ENSMUST00000108042.2	ENSMUSG00000073889	Il11ra1	protein_coding	0.000427407	0.0120382	0.537018	0.152451	6.99671	0.114406	0.00517364	0.0296884	0.0101207	0.0296884	12.4639	11.0005	14.6638	26.9895	18.6959	19.0967
ENSMUST00000020251.9	ENSMUSG00000035311	Gnptab	protein_coding	0.00043064	0.0121221	-0.359255	0.102045	6.33565	0.0416076	0.00245173	0.00115865	0.013168	0.013168	3.43713	3.94024	3.44199	2.40011	2.65917	2.38716
ENSMUST00000221714.1	ENSMUSG00000020576	Nbas	processed_transcript	0.000430944	0.0121234	4.26832	1.21246	1.44102	5.64766	1.07241	-0.844808	1.13269	1.13269	0	0	0	1.24748	0.368561	0.398474
ENSMUST00000027792.5	ENSMUSG00000026511	Srp9	protein_coding	0.000432931	0.0121721	-0.282283	0.0802135	7.60097	0.0308734	0.00103761	0.00767274	0.00861369	0.00861369	60.8524	60.4475	57.4066	38.3023	49.6878	46.0063
ENSMUST00000160289.8	ENSMUSG00000040331	Nsmce4a	protein_coding	0.00043326	0.0121741	0.317406	0.0901992	6.94902	0.033992	0.0019349	0.00277507	0.0102689	0.0102689	19.5561	19.4205	21.53	25.4509	29.0246	27.4221
ENSMUST00000053981.5	ENSMUSG00000045237	1110012L19Rik	protein_coding	0.000434392	0.0121986	-0.323808	0.0920364	6.7082	0.0378756	0.00154889	0.00647639	0.0111572	0.0111572	31.2727	25.5792	30.6143	20.2232	20.6629	20.998
ENSMUST00000004201.7	ENSMUSG00000004098	Col5a3	protein_coding	0.0004353	0.0122169	1.22465	0.348138	6.75036	0.595368	0.00188827	0.179912	0.0109815	0.179912	0.994374	2.0697	2.54804	7.99858	5.88265	4.27128
ENSMUST00000139946.7	ENSMUSG00000031575	Ash2l	nonsense_mediated_decay	0.000435675	0.0122201	4.16388	1.18377	3.11125	6.09116	1.81302	-0.70079	0.288949	0.288949	0.000241216	0.0473901	0.0897293	2.09333	2.06534	1.67303
ENSMUST00000005041.14	ENSMUSG00000030435	U2af2	protein_coding	0.000438103	0.0122809	0.257279	0.0731738	9.19322	0.0239266	0.000475569	0.00461056	0.00755603	0.00755603	97.297	101.491	110.214	135.313	125.773	134.794
ENSMUST00000077755.10	ENSMUSG00000008475	Arpc5	protein_coding	0.000441331	0.0123621	-0.251072	0.071448	9.04497	0.0225317	0.000172899	0.00435274	0.00748434	0.00748434	165.267	159.302	154.829	110.356	126.868	131.628
ENSMUST00000052374.12	ENSMUSG00000022391	Rangap1	protein_coding	0.000441524	0.0123621	0.255523	0.0727171	9.29941	0.0244975	0.000302356	0.00583503	0.00762931	0.00762931	81.3127	79.2999	89.971	112.709	99.3186	108.162
ENSMUST00000198254.4	ENSMUSG00000037062	Sh3glb1	protein_coding	0.000442346	0.0123778	-0.458767	0.130575	7.17934	0.0835999	0.00173079	0.0238439	0.00960933	0.0238439	7.48128	10.3454	8.80846	4.52053	6.37565	5.70836
ENSMUST00000032844.6	ENSMUSG00000030615	Tmem126a	protein_coding	0.00044648	0.0124427	-0.362755	0.103321	7.15244	0.0522875	0.000943878	0.0150688	0.00968015	0.0150688	80.2731	76.2207	75.6099	43.2481	58.4156	58.6913
ENSMUST00000209451.1	ENSMUSG00000053626	Tll1	retained_intron	0.000446113	0.0124427	-0.98778	0.281324	4.09649	0.321131	0.0507553	-0.0152327	0.0679594	0.0679594	1.32517	1.04418	0.777764	0.387079	0.388095	0.345549
ENSMUST00000136938.1	ENSMUSG00000019505	Ubb	protein_coding	0.000446509	0.0124427	-0.541569	0.154252	6.33708	0.105812	0.0225304	-0.000252391	0.0131599	0.0131599	25.2793	31.1178	21.1668	13.4952	13.7657	16.946
ENSMUST00000067543.7	ENSMUSG00000032501	Trib1	protein_coding	0.000445945	0.0124427	0.36002	0.102532	6.80765	0.0514996	0.00120448	0.0145648	0.0107579	0.0145648	4.40532	5.17764	4.46933	7.78449	6.60133	5.64229
ENSMUST00000023737.5	ENSMUSG00000023000	Dhh	protein_coding	0.000446449	0.0124427	-1.19733	0.341023	3.62648	0.483512	0.0345381	0.0322564	0.139907	0.139907	0.600651	0.442768	0.308657	0.10305	0.144189	0.140322
ENSMUST00000114877.7	ENSMUSG00000022906	Parp9	retained_intron	0.000446402	0.0124427	3.32937	0.948264	1.51009	3.75074	0.262115	0.269559	1.08669	1.08669	0	0	0.0239653	0.205181	0.465843	0.220361
ENSMUST00000007747.9	ENSMUSG00000007603	Dus3l	protein_coding	0.000445297	0.0124427	0.299729	0.0853523	7.19859	0.0309105	0.00136812	0.00358094	0.0095594	0.0095594	14.1714	14.721	14.9759	20.329	17.7985	20.6042
ENSMUST00000040307.5	ENSMUSG00000040502	March9	protein_coding	0.000447487	0.0124626	0.600002	0.170923	4.80558	0.116285	0.0112454	-0.000889535	0.0325764	0.0325764	0.771695	0.759723	0.692339	1.38028	1.16076	1.51898
ENSMUST00000114050.7	ENSMUSG00000079523	Tmsb10	protein_coding	0.000447991	0.0124691	-0.320089	0.0911916	11.0724	0.0365735	1.5613e-05	0.00728003	0.0124582	0.0124582	5413.98	4436.99	5126.52	3529.7	3437.1	3735.45
ENSMUST00000163812.8	ENSMUSG00000038943	Prc1	protein_coding	0.000448325	0.0124691	0.420977	0.119941	6.98144	0.0628654	0.0114114	0.000712246	0.0101674	0.0101674	9.92841	8.05104	8.92621	11.8761	14.7304	13.7763
ENSMUST00000020308.4	ENSMUSG00000020108	Ddit4	protein_coding	0.00044851	0.0124691	0.291614	0.0830865	7.23064	0.0269053	0.000877559	0.000864611	0.0094775	0.0094775	19.1584	19.5538	17.4603	26.093	23.9989	24.3858
ENSMUST00000165563.7	ENSMUSG00000020111	Micu1	protein_coding	0.000449569	0.0124911	0.272394	0.0776244	8.15627	0.0256007	0.00126379	0.00291257	0.00777452	0.00777452	35.3753	35.2514	33.9068	49.8986	42.4674	43.2121
ENSMUST00000034278.5	ENSMUSG00000031821	Gins2	protein_coding	0.000450354	0.0125056	0.289387	0.0824777	7.36006	0.0314122	0.00104589	0.00681502	0.00915797	0.00915797	9.06304	8.75027	10.4306	13.206	11.9899	11.972
ENSMUST00000110700.1	ENSMUSG00000027284	Cdan1	protein_coding	0.0004514	0.0125273	0.515707	0.147007	5.80481	0.105719	0.0119397	0.0204768	0.0164594	0.0204768	1.08504	1.1781	1.22656	2.54068	1.70666	1.63992
ENSMUST00000151129.7	ENSMUSG00000028691	Prdx1	protein_coding	0.000452143	0.0125405	-0.810035	0.230936	7.78616	0.260844	0.00215281	0.0778443	0.00827185	0.0778443	209.054	272.218	311.76	75.7075	137.445	140.353
ENSMUST00000105733.2	ENSMUSG00000070605	Zfp992	protein_coding	0.000455593	0.0126288	-0.789569	0.225231	4.76852	0.247901	0.0152267	0.0608669	0.0335412	0.0608669	1.39765	1.32062	1.36913	0.393073	0.859841	0.65963
ENSMUST00000077626.12	ENSMUSG00000038383	Pigu	protein_coding	0.000456467	0.0126456	0.308377	0.0879801	6.85806	0.0346903	0.00103666	0.00666495	0.0105741	0.0105741	15.7613	15.2722	16.1955	23.8171	19.082	20.717
ENSMUST00000027396.14	ENSMUSG00000026198	Abcb6	protein_coding	0.000457625	0.0126703	0.338971	0.0967272	6.52829	0.036493	0.00200114	0.000527081	0.0120331	0.0120331	5.2951	5.18879	5.22472	7.28504	6.79924	7.71281
ENSMUST00000220427.1	ENSMUSG00000090841	Myl6	nonsense_mediated_decay	0.000458115	0.0126764	-0.39386	0.112399	6.53221	0.061698	0.00605747	0.0128929	0.0120115	0.0128929	36.4969	32.2163	44.8058	23.6685	26.5626	24.7813
ENSMUST00000194529.1	ENSMUSG00000102307	Gm38194	TEC	0.000460602	0.0127338	-0.648781	0.185224	4.58017	0.141619	0.012064	0.0071162	0.039398	0.039398	1.66462	2.16475	1.50979	0.975103	0.937948	0.808823
ENSMUST00000120705.2	ENSMUSG00000042492	Tbc1d10b	protein_coding	0.000460729	0.0127338	0.267569	0.0763914	7.8609	0.024124	0.000601425	0.0027061	0.00815204	0.00815204	16.1972	16.1425	15.6993	22.0385	18.9679	21.1445
ENSMUST00000030432.7	ENSMUSG00000028672	Hmgcl	protein_coding	0.000461051	0.0127353	0.29403	0.0839506	7.15629	0.0306813	0.000901608	0.0050298	0.00966994	0.00966994	24.4878	21.6903	22.4874	29.5637	27.9118	33.1368
ENSMUST00000110367.9	ENSMUSG00000038143	Stox2	protein_coding	0.000461585	0.0127364	-0.675262	0.192816	4.63993	0.176789	0.0184235	0.0315705	0.0373432	0.0373432	1.14782	1.37598	0.979041	0.422572	0.63787	0.722745
ENSMUST00000135402.3	ENSMUSG00000084957	Bbip1	protein_coding	0.000461633	0.0127364	-0.669679	0.191223	4.53986	0.15221	0.0139426	0.00814337	0.0409067	0.0409067	1.99731	2.43021	2.44998	0.921438	1.25912	1.2984
ENSMUST00000196695.4	ENSMUSG00000028034	Fubp1	protein_coding	0.000463047	0.012768	0.277445	0.0792413	7.74843	0.030222	0.00108256	0.00782896	0.00833622	0.00833622	25.2047	24.0904	29.3093	31.5908	36.1712	34.6438
ENSMUST00000106243.7	ENSMUSG00000011257	Pabpc4	protein_coding	0.000465327	0.0128232	0.300583	0.0858819	8.36304	0.0351029	0.00346693	0.00653035	0.00759662	0.00759662	30.7273	33.8879	33.4243	50.4963	41.7753	39.3935
ENSMUST00000105306.2	ENSMUSG00000020042	Btbd11	protein_coding	0.000465791	0.0128232	0.699956	0.200005	5.13135	0.17446	0.0342203	0.000128137	0.0257827	0.0257827	0.774308	0.964589	0.851445	2.25271	1.44299	1.55056
ENSMUST00000020249.1	ENSMUSG00000020057	Dram1	protein_coding	0.000465899	0.0128232	0.458409	0.130988	5.50248	0.0664328	0.00588625	-0.00164743	0.0198505	0.0198505	2.00548	2.22567	2.18955	3.35163	3.59865	3.07076
ENSMUST00000026013.5	ENSMUSG00000025037	Maoa	protein_coding	0.000466135	0.0128232	-0.42507	0.121466	7.73879	0.07191	0.000529318	0.0216016	0.00835309	0.0216016	26.2947	20.5938	21.5023	12.231	15.23	16.7284
ENSMUST00000170010.2	ENSMUSG00000024844	Banf1	protein_coding	0.000466924	0.0128374	0.274597	0.0784777	7.87889	0.0260638	0.0011134	0.00318998	0.00812472	0.00812472	96.1634	91.0095	100.536	131.897	120.25	122.649
ENSMUST00000028995.4	ENSMUSG00000027495	Fam210b	protein_coding	0.000470104	0.0129173	-0.443257	0.126745	6.32038	0.0782202	0.00175603	0.0223404	0.0132547	0.0223404	6.52437	5.46632	4.71087	3.55123	2.98227	4.04137
ENSMUST00000026993.13	ENSMUSG00000025875	Tspan17	protein_coding	0.000470611	0.0129237	-0.415629	0.118855	5.79487	0.0586683	0.00464774	0.00390734	0.0165419	0.0165419	7.34566	5.8655	6.60299	4.48157	4.24143	4.1524
ENSMUST00000017851.3	ENSMUSG00000017707	Serinc3	protein_coding	0.000475928	0.0130546	-0.255981	0.0732639	8.2294	0.0243332	0.000347693	0.00549651	0.00770372	0.00770372	36.22	41.0414	37.6974	27.1902	32.8282	27.7139
ENSMUST00000014220.14	ENSMUSG00000014075	Tctex1d2	protein_coding	0.000475681	0.0130546	-0.573766	0.164211	4.93293	0.118208	0.0108353	0.0134718	0.0296123	0.0296123	9.83205	8.394	8.24456	3.86963	5.57422	5.40741
ENSMUST00000038383.13	ENSMUSG00000061758	Akr1b10	protein_coding	0.000476408	0.0130601	-0.389435	0.111468	6.45776	0.0604081	0.00261015	0.0160276	0.0124433	0.0160276	19.8801	14.5048	19.3132	11.0887	11.9951	12.2632
ENSMUST00000236335.1	ENSMUSG00000024026	Glo1	protein_coding	0.000477296	0.0130769	-0.694704	0.198874	4.54441	0.159078	0.0185949	-0.000727382	0.0407314	0.0407314	0.415468	0.444273	0.32348	0.179577	0.219273	0.17988
ENSMUST00000029422.13	ENSMUSG00000027833	Shox2	protein_coding	0.000477887	0.0130855	0.791815	0.226696	4.83851	0.220581	0.0453254	-0.00471354	0.031761	0.031761	0.671384	1.14328	0.739909	1.96634	1.84445	1.65855
ENSMUST00000234810.1	ENSMUSG00000073639	Rab18	protein_coding	0.000479313	0.013117	-0.436673	0.125047	7.47972	0.0759693	0.000760608	0.0226947	0.00887403	0.0226947	12.4321	11.4643	10.2354	5.75356	8.22503	7.93263
ENSMUST00000144337.1	ENSMUSG00000079523	Tmsb10	protein_coding	0.000480283	0.0131359	-0.555753	0.159172	4.93677	0.114773	0.00847349	0.0191699	0.0295302	0.0295302	17.2981	12.0539	17.3692	8.42941	8.50944	9.22163
ENSMUST00000028157.8	ENSMUSG00000026816	Gtf3c5	protein_coding	0.000481519	0.0131621	0.328062	0.0939782	6.92371	0.040755	0.00289714	0.00768735	0.0103507	0.0103507	8.88226	8.33817	8.98845	13.6904	12.0427	10.4254
ENSMUST00000108450.4	ENSMUSG00000062300	Nectin2	protein_coding	0.00048337	0.0131974	0.267605	0.076682	7.82099	0.0259339	0.000605429	0.00495724	0.00821476	0.00821476	30.695	26.2194	27.4246	39.4372	35.0883	34.6666
ENSMUST00000213683.1	ENSMUSG00000035443	Thyn1	protein_coding	0.000483187	0.0131974	-0.718114	0.205769	6.25957	0.205515	0.0102984	0.0532127	0.0135947	0.0532127	26.3709	19.894	21.8232	7.79056	11.0076	14.7145
ENSMUST00000054956.14	ENSMUSG00000024776	Stambpl1	protein_coding	0.000484589	0.013223	0.59072	0.169303	5.57924	0.134477	0.0242145	0.0130253	0.0187807	0.0187807	2.49719	3.9318	2.56501	4.674	5.07172	6.0437
ENSMUST00000102573.7	ENSMUSG00000027189	Trim44	protein_coding	0.000487939	0.0133068	-0.399871	0.114665	7.80549	0.0637467	0.000571976	0.0191502	0.00823989	0.0191502	14.5584	17.6083	15.8123	8.57165	12.1352	11.3073
ENSMUST00000021676.11	ENSMUSG00000021252	Erg28	protein_coding	0.000489906	0.0133527	0.302545	0.0867832	7.0453	0.031964	0.00132025	0.00430972	0.00997674	0.00997674	29.2834	26.5716	31.7293	37.8099	39.9379	38.5183
ENSMUST00000106739.7	ENSMUSG00000031026	Trim66	protein_coding	0.000493292	0.0134372	0.706221	0.202682	4.4834	0.1967	0.0184124	0.0404323	0.0432078	0.0432078	0.167306	0.152219	0.216839	0.46732	0.360254	0.26546
ENSMUST00000030714.7	ENSMUSG00000028883	Sema3a	protein_coding	0.000495381	0.0134863	-0.650643	0.186792	5.45619	0.168871	0.0178568	0.0344804	0.0205558	0.0344804	1.78817	2.25323	1.49243	0.689665	1.10915	1.0589
ENSMUST00000030154.6	ENSMUSG00000028443	Nudt2	protein_coding	0.000495956	0.0134942	-0.373371	0.1072	6.07573	0.0547646	0.00261585	0.0135627	0.014622	0.014622	26.1851	18.8656	22.3598	14.0078	14.8589	16.3501
ENSMUST00000059204.10	ENSMUSG00000043556	Fbxl7	protein_coding	0.000496939	0.0135132	-0.35387	0.101617	6.27983	0.0479205	0.00200669	0.010935	0.0134822	0.0134822	3.60478	4.16528	3.69523	3.03308	2.68376	2.26786
ENSMUST00000202868.3	ENSMUSG00000037373	Ctbp1	protein_coding	0.000500632	0.0136058	0.300641	0.0863808	8.34264	0.0360696	0.00172216	0.00947032	0.00761113	0.00947032	39.4155	41.3169	39.3937	63.0114	47.8423	50.6367
ENSMUST00000061280.16	ENSMUSG00000051285	Pcmtd1	protein_coding	0.000502069	0.013637	-0.643769	0.18501	5.15655	0.165406	0.0181851	0.0331578	0.0253443	0.0331578	1.32651	1.98759	1.5416	0.607437	0.949169	0.964246
ENSMUST00000081333.10	ENSMUSG00000059363	Fxn	protein_coding	0.000503341	0.0136637	0.374762	0.107722	6.05728	0.0484415	0.00267643	0.00520796	0.0147296	0.0147296	10.7398	9.54449	9.096	13.4334	13.2485	15.5362
ENSMUST00000020024.11	ENSMUSG00000019874	Fabp7	protein_coding	0.000503759	0.0136672	-0.974698	0.280186	3.88951	0.336849	0.0252828	0.0395156	0.0924736	0.0924736	5.19882	2.75391	4.36667	1.37659	1.7062	1.28922
ENSMUST00000066728.9	ENSMUSG00000053965	Pde5a	protein_coding	0.000508227	0.0137805	-0.64355	0.185121	5.16716	0.134643	0.0262424	-0.013247	0.0251622	0.0251622	0.966748	1.11619	1.12687	0.468944	0.615778	0.580727
ENSMUST00000047903.9	ENSMUSG00000034807	Colgalt1	protein_coding	0.000508999	0.0137935	0.24732	0.0711514	8.76514	0.02223	0.000150449	0.00469922	0.00744333	0.00744333	50.8423	48.4578	46.9709	68.5841	59.3471	57.8233
ENSMUST00000078259.7	ENSMUSG00000062510	Nsl1	protein_coding	0.000511005	0.0138399	0.437401	0.125874	5.63991	0.0664514	0.00571626	0.00560312	0.01805	0.01805	1.19635	1.47362	1.30243	2.26231	2.01295	1.79285
ENSMUST00000031032.10	ENSMUSG00000029147	Ppm1g	protein_coding	0.000512554	0.0138663	0.247718	0.0713041	8.85957	0.0236244	0.000182852	0.00633606	0.00744357	0.00744357	72.1655	72.5804	77.9984	104.08	86.9911	92.2479
ENSMUST00000161527.7	ENSMUSG00000022553	Maf1	protein_coding	0.000512568	0.0138663	0.903123	0.259959	4.98082	0.294337	0.0727533	-0.0106936	0.0286145	0.0286145	1.80868	1.00085	1.77671	3.659	3.4295	3.74074
ENSMUST00000079721.8	ENSMUSG00000058665	En1	protein_coding	0.000519156	0.0140285	0.371826	0.107134	6.03128	0.0538664	0.00233228	0.0131551	0.0148842	0.0148842	3.18921	3.67788	3.89095	5.9247	4.99406	4.57457
ENSMUST00000120613.8	ENSMUSG00000018395	Kif3a	protein_coding	0.000519038	0.0140285	-0.418276	0.120515	5.95803	0.0578916	0.006444	0.000312315	0.0153419	0.0153419	4.10924	4.83241	4.58502	2.6384	3.07363	3.06096
ENSMUST00000102944.10	ENSMUSG00000028466	Creb3	protein_coding	0.000520022	0.0140439	-0.265054	0.0763796	8.23539	0.0280768	0.000650105	0.00810067	0.0076983	0.00810067	70.317	56.2339	64.3319	47.454	46.1521	50.5838
ENSMUST00000025759.8	ENSMUSG00000024841	Eif1ad	protein_coding	0.000521919	0.014087	0.289497	0.0834465	7.17975	0.0324755	0.000836704	0.0083296	0.00960827	0.00960827	12.3843	12.2234	13.8593	18.816	16.9573	15.3049
ENSMUST00000035148.12	ENSMUSG00000032548	Slco2a1	protein_coding	0.000522987	0.0141059	0.703141	0.20271	7.1039	0.197632	0.00137968	0.0602576	0.00981138	0.0602576	2.46252	3.76055	3.51302	8.56722	5.85746	5.15485
ENSMUST00000161807.7	ENSMUSG00000079197	Psme2	protein_coding	0.000523215	0.0141059	0.284721	0.0820857	7.54103	0.0310154	0.00136843	0.00700108	0.00873866	0.00873866	54.6861	51.2974	58.0114	69.8522	80.1335	65.9549
ENSMUST00000094041.3	ENSMUSG00000040483	Xaf1	nonsense_mediated_decay	0.000525487	0.0141591	3.20293	0.923723	2.71408	4.10155	0.126819	1.15308	0.430866	1.15308	0	0.818538	1.02786	9.21218	13.5361	7.15896
ENSMUST00000072503.12	ENSMUSG00000059070	Rpl18	protein_coding	0.000525966	0.0141639	0.303867	0.0876413	10.8816	0.0360373	2.23436e-05	0.0103986	0.0114992	0.0114992	2446.92	2054.14	2458.76	3140.58	2832.05	3314.5
ENSMUST00000038332.8	ENSMUSG00000038888	Ctu1	protein_coding	0.000529697	0.0142562	0.338997	0.097827	6.4069	0.0444642	0.00160222	0.0108834	0.012753	0.012753	6.0512	5.36445	4.98178	8.68576	6.73302	7.44698
ENSMUST00000236370.1	ENSMUSG00000084957	Bbip1	protein_coding	0.000532127	0.0143135	-0.666655	0.19245	5.57937	0.177773	0.00663541	0.0489201	0.0187789	0.0489201	22.9748	23.2808	22.6151	7.90839	13.0744	14.8282
ENSMUST00000026583.14	ENSMUSG00000025509	Pnpla2	nonsense_mediated_decay	0.000532474	0.0143147	-0.33478	0.0966493	6.83363	0.0392502	0.00334986	0.00368367	0.0106618	0.0106618	14.9158	13.2933	14.2707	10.9486	9.07088	10.1288
ENSMUST00000031382.13	ENSMUSG00000049550	Clip1	protein_coding	0.000536332	0.0144026	-1.14301	0.330165	5.22875	0.522751	0.0842947	0.0792191	0.0241297	0.0792191	1.61895	2.66917	2.20803	0.364943	0.964332	0.826797
ENSMUST00000106282.7	ENSMUSG00000030814	Bcl7c	nonsense_mediated_decay	0.000536353	0.0144026	0.385963	0.111488	5.91641	0.047134	0.0030239	3.08355e-05	0.0156206	0.0156206	1.36153	1.36797	1.2888	2.11903	1.89002	1.84438
ENSMUST00000109844.10	ENSMUSG00000040856	Dlk1	protein_coding	0.000538503	0.0144521	0.852431	0.246308	8.72626	0.290792	0.00032909	0.0906722	0.00744723	0.0906722	54.9335	72.2505	66.2976	204.089	170.403	94.842
ENSMUST00000056096.14	ENSMUSG00000050064	Zfp697	protein_coding	0.00054086	0.0145071	-0.487716	0.140972	5.49511	0.08129	0.0098472	0.0025653	0.0199625	0.0199625	1.91097	1.77029	1.43839	0.943194	1.1155	1.03052
ENSMUST00000043990.13	ENSMUSG00000038957	Edc3	protein_coding	0.000542373	0.0145394	0.339065	0.0980267	6.98629	0.0386076	0.0042614	0.000886064	0.0101525	0.0101525	4.00954	4.37348	4.55853	6.46095	5.67544	5.77928
ENSMUST00000021284.3	ENSMUSG00000020902	Ntn1	protein_coding	0.000543419	0.0145592	0.619277	0.179065	6.28758	0.153528	0.00267417	0.0454223	0.013439	0.0454223	1.57438	1.71146	1.93548	4.14789	3.3428	2.34527
ENSMUST00000179343.2	ENSMUSG00000094483	Purb	protein_coding	0.000546708	0.014639	-0.428026	0.123823	7.85934	0.0733605	0.000482091	0.0225161	0.00815445	0.0225161	12.1432	15.3361	10.4783	7.04537	8.85518	8.25315
ENSMUST00000102567.3	ENSMUSG00000066042	Med18	protein_coding	0.000547848	0.0146612	0.474882	0.1374	5.35285	0.0844262	0.0061704	0.014795	0.0221478	0.0221478	3.71335	2.59942	3.1732	5.36798	5.04834	4.48663
ENSMUST00000027863.12	ENSMUSG00000026576	Atp1b1	protein_coding	0.000550553	0.0147174	-0.305374	0.0883893	6.87479	0.0366953	0.00120345	0.00969576	0.0105155	0.0105155	14.8841	13.6634	11.1793	9.30671	10.304	9.26628
ENSMUST00000107060.7	ENSMUSG00000020929	Eftud2	protein_coding	0.000550572	0.0147174	0.254438	0.0736464	9.06511	0.0225574	0.000643681	0.00327599	0.00749202	0.00749202	58.899	61.0788	65.9822	81.4167	74.8494	80.5047
ENSMUST00000130491.2	ENSMUSG00000056216	Cebpg	protein_coding	0.000556128	0.0148575	0.399439	0.115707	6.46507	0.0639311	0.00244808	0.0176341	0.0123988	0.0176341	2.97046	3.77738	3.99862	4.72164	6.13433	4.90833
ENSMUST00000041377.12	ENSMUSG00000042228	Lyn	protein_coding	0.000557562	0.0148874	-0.36946	0.107044	6.44667	0.04215	0.00467604	-0.00317619	0.0125117	0.0125117	6.74604	6.92135	6.75435	4.48503	4.98853	4.47904
ENSMUST00000087557.11	ENSMUSG00000067377	Tspan6	protein_coding	0.000559964	0.0149431	-0.292793	0.0848602	7.16216	0.0287609	0.00114746	0.00265573	0.00965441	0.00965441	29.8935	29.2488	27.8507	19.9744	23.3523	20.6983
ENSMUST00000168120.2	ENSMUSG00000072949	Acot1	protein_coding	0.000560665	0.0149534	0.863013	0.250152	4.84083	0.298529	0.0218149	0.0720489	0.031705	0.0720489	1.44929	1.22244	0.625516	2.61672	2.54055	2.17608
ENSMUST00000102993.9	ENSMUSG00000039159	Ube2h	protein_coding	0.000562205	0.0149788	-0.260034	0.0753892	7.90004	0.0234265	0.000431969	0.00349454	0.00809332	0.00809332	19.3381	19.5217	17.5625	14.4883	15.4183	13.1218
ENSMUST00000082414.1	ENSMUSG00000064363	mt-Nd4	protein_coding	0.000562254	0.0149788	-0.534788	0.155047	9.77028	0.114647	6.19415e-05	0.0359975	0.00819029	0.0359975	517.295	891.054	655.372	374.296	425.787	359.55
ENSMUST00000046743.10	ENSMUSG00000033488	Cryzl2	protein_coding	0.000565846	0.0150321	-0.715074	0.207419	4.38177	0.155806	0.0165422	-0.0135338	0.047992	0.047992	2.10239	1.91447	2.06637	1.02531	0.953853	0.944262
ENSMUST00000052266.14	ENSMUSG00000029763	Exoc4	protein_coding	0.000565354	0.0150321	-0.248769	0.0721547	8.45956	0.0218708	0.000272552	0.0038587	0.0075369	0.0075369	30.1063	34.2636	31.4632	22.6362	26.4679	24.6031
ENSMUST00000022419.6	ENSMUSG00000021868	Ppif	protein_coding	0.000565814	0.0150321	0.312696	0.0907025	6.77832	0.033728	0.00147005	0.00402282	0.0108704	0.0108704	14.7446	14.9609	13.1504	18.4324	18.2199	21.2605
ENSMUST00000025523.12	ENSMUSG00000024621	Csf1r	protein_coding	0.000565302	0.0150321	0.766036	0.222185	6.43032	0.235283	0.00877212	0.0652771	0.0126118	0.0652771	2.17635	3.06152	3.72109	6.04153	8.18983	4.79735
ENSMUST00000119328.1	ENSMUSG00000068014	Gm14648	processed_pseudogene	0.000565073	0.0150321	3.84689	1.11574	1.2303	5.02284	0.593036	0.136042	1.27427	1.27427	0	0	0	7.53208	0.629475	2.15139
ENSMUST00000167085.7	ENSMUSG00000038305	Spats2l	protein_coding	0.000568365	0.0150906	0.432547	0.125511	5.86343	0.0664445	0.00762952	0.00526463	0.0160002	0.0160002	1.94671	2.09001	2.39197	3.55265	3.38369	2.83985
ENSMUST00000042710.7	ENSMUSG00000038059	Smim3	protein_coding	0.000571711	0.0151709	0.297115	0.0862531	7.03693	0.0270371	0.00115832	-0.000466027	0.0100011	0.0100011	14.2359	14.6087	14.5583	19.7117	19.2352	18.6967
ENSMUST00000117148.1	ENSMUSG00000039617	Gm7488	processed_pseudogene	0.000574325	0.0152317	0.31755	0.0922182	6.94669	0.0365755	0.00247994	0.00542533	0.0102764	0.0102764	48.6955	46.8839	57.1404	68.8643	69.3994	68.1742
ENSMUST00000039900.3	ENSMUSG00000032673	Prorsd1	protein_coding	0.000575159	0.0152453	-0.429274	0.124678	5.63524	0.0664743	0.00521377	0.00877543	0.0181031	0.0181031	16.5019	15.6951	12.9987	8.43315	10.7547	9.74095
ENSMUST00000040069.9	ENSMUSG00000036103	Colec12	nonsense_mediated_decay	0.000577721	0.0153046	0.409924	0.119099	6.72084	0.0674328	0.00174689	0.0195301	0.0111034	0.0195301	4.9373	6.48453	6.2254	8.21172	10.3261	7.66374
ENSMUST00000102774.10	ENSMUSG00000015837	Sqstm1	protein_coding	0.000579012	0.0153302	-0.25803	0.0749812	9.87216	0.0243805	6.656e-05	0.0054418	0.0083667	0.0083667	310.228	294.577	275.251	223.724	205.78	244.201
ENSMUST00000204753.2	ENSMUSG00000056952	Tatdn2	protein_coding	0.000579767	0.0153416	0.39795	0.115653	7.65997	0.06356	0.00269287	0.0173704	0.00849766	0.0173704	19.7343	18.1667	16.3241	31.0668	21.8495	27.5884
ENSMUST00000078369.2	ENSMUSG00000061615	H2ac4	protein_coding	0.000580911	0.0153632	-1.3537	0.393473	4.73466	0.735533	0.0125702	0.219662	0.0344699	0.219662	32.4991	24.3207	9.73958	4.3656	3.81639	7.48583
ENSMUST00000091288.12	ENSMUSG00000079037	Prnp	protein_coding	0.000581878	0.0153802	-0.250024	0.072683	8.34045	0.0248877	0.000311501	0.00735609	0.00761273	0.00761273	63.7206	65.1116	61.8911	55.1664	49.438	43.018
ENSMUST00000070742.13	ENSMUSG00000032344	Cgas	protein_coding	0.00058282	0.0153965	0.612092	0.17796	4.89548	0.146037	0.0170713	0.0249793	0.0304336	0.0304336	0.601385	0.810781	0.816398	1.68545	1.36515	1.05069
ENSMUST00000092566.7	ENSMUSG00000019838	Slc16a10	protein_coding	0.000583583	0.015408	0.604286	0.175709	4.7655	0.118981	0.0126884	-0.000897958	0.033622	0.033622	0.412601	0.534758	0.478295	0.852142	0.946334	0.778403
ENSMUST00000160337.1	ENSMUSG00000019923	Zwint	protein_coding	0.000584538	0.0154246	-0.329441	0.0958042	7.31956	0.0435736	0.00144416	0.0123235	0.00925648	0.0123235	54.0598	47.8089	52.6365	30.7353	38.1757	40.7071
ENSMUST00000022808.13	ENSMUSG00000022194	Pabpn1	protein_coding	0.000585269	0.0154353	0.517652	0.150552	7.8342	0.107588	0.00067728	0.0333218	0.00819367	0.0333218	67.1754	66.4886	41.1539	102.833	92.2297	89.5259
ENSMUST00000004396.12	ENSMUSG00000004285	Atp6v1f	protein_coding	0.000588123	0.0154933	-0.303062	0.0881755	7.92023	0.0368839	0.000394049	0.0112683	0.0080641	0.0112683	172.495	132.627	149.398	108.003	102.378	120.725
ENSMUST00000229031.1	ENSMUSG00000033039	Micall1	nonsense_mediated_decay	0.000588041	0.0154933	4.81982	1.4023	1.71676	7.01968	1.99673	-1.93362	0.952949	0.952949	0	0	0	0.250041	0.322075	0.157473
ENSMUST00000034590.3	ENSMUSG00000032085	Tagln	protein_coding	0.000589954	0.0155328	-0.392577	0.114248	11.9784	0.0568619	6.84369e-06	0.0132768	0.0195719	0.0195719	4099.68	3130.65	3644.01	2362.09	2237.89	2615.91
ENSMUST00000143514.2	ENSMUSG00000074513	Arfip1	protein_coding	0.000590912	0.0155494	-0.425181	0.123752	5.82293	0.071869	0.00665924	0.015385	0.0163126	0.0163126	10.5992	10.5311	11.3554	5.51618	8.23995	7.33202
ENSMUST00000108814.7	ENSMUSG00000038685	Rtel1	protein_coding	0.000592096	0.0155719	0.656894	0.191224	5.63811	0.139266	0.0367794	-0.0245129	0.0180705	0.0180705	1.33376	1.23643	1.16427	2.16612	2.21376	2.78308
ENSMUST00000031341.10	ENSMUSG00000029394	Cdk2ap1	protein_coding	0.000595789	0.0156549	0.247205	0.0719975	8.72697	0.0221067	0.000328316	0.00438862	0.00744714	0.00744714	124.423	122.863	124.12	174.255	146.698	150.492
ENSMUST00000080723.10	ENSMUSG00000004535	Tax1bp1	protein_coding	0.000596248	0.0156549	-0.507614	0.14785	7.87633	0.103533	0.000380294	0.032409	0.00812856	0.032409	33.5625	36.3608	33.1081	15.1107	23.9676	23.1148
ENSMUST00000106113.1	ENSMUSG00000039275	Foxk2	protein_coding	0.000595934	0.0156549	0.247452	0.0720709	8.396	0.0197628	0.000216743	0.00152448	0.00757458	0.00757458	20.4544	21.9278	21.6612	28.2966	26.2119	26.5501
ENSMUST00000015236.3	ENSMUSG00000015092	Edf1	protein_coding	0.000597365	0.0156755	0.244394	0.0711936	8.90401	0.0201276	0.00015434	0.00260699	0.00744845	0.00744845	305.265	275.846	285.573	386.524	348.403	360.9
ENSMUST00000180036.7	ENSMUSG00000035242	Oaz1	protein_coding	0.000598408	0.0156942	0.275348	0.0802219	9.37076	0.0304677	0.000245623	0.00940771	0.0076891	0.00940771	322.053	252.455	296.386	382.121	355.88	390.116
ENSMUST00000028199.11	ENSMUSG00000026848	Tor1b	protein_coding	0.000599128	0.0157043	0.28353	0.0826133	7.34342	0.0319838	0.00103912	0.00879475	0.00919832	0.00919832	13.6081	12.3768	11.6357	18.3758	16.5995	14.4668
ENSMUST00000090568.6	ENSMUSG00000068748	Ptprz1	protein_coding	0.000601196	0.0157498	-0.612446	0.1785	4.91894	0.116978	0.0178787	-0.0123154	0.0299147	0.0299147	0.67436	0.74811	0.677507	0.341796	0.367594	0.413084
ENSMUST00000206219.1	ENSMUSG00000030660	Pik3c2a	protein_coding	0.00060176	0.0157558	-1.02523	0.29883	4.8672	0.33298	0.102869	-0.0808089	0.03108	0.03108	1.44438	1.32557	1.02527	0.432451	0.498349	0.395116
ENSMUST00000039135.5	ENSMUSG00000044447	Dock5	protein_coding	0.000603495	0.0157925	-0.277795	0.0809888	7.43805	0.0251424	0.000868295	0.00162096	0.00897049	0.00897049	5.08378	5.95071	5.32405	3.9743	4.15418	4.07111
ENSMUST00000140866.7	ENSMUSG00000018899	Irf1	protein_coding	0.000604032	0.0157978	-3.92871	1.14546	1.27121	4.79689	0.721381	-0.513309	1.24675	1.24675	2.02869	1.04619	0.509627	0	0	0
ENSMUST00000064447.11	ENSMUSG00000052533	Nup188	protein_coding	0.000605229	0.0158119	0.261452	0.0762414	8.66208	0.0274824	0.000177141	0.00854199	0.00745877	0.00854199	20.2931	24.4974	25.4595	30.962	28.9845	29.7966
ENSMUST00000066743.10	ENSMUSG00000053950	Adnp2	protein_coding	0.00060524	0.0158119	0.313361	0.0913788	6.67419	0.0329953	0.00121883	0.0032021	0.0113063	0.0113063	3.61506	4.25425	3.5848	5.24196	4.92574	5.2312
ENSMUST00000048545.9	ENSMUSG00000040459	Arglu1	protein_coding	0.00060779	0.0158697	0.343314	0.100147	6.43498	0.0413556	0.00246054	0.00503483	0.0125835	0.0125835	6.16903	4.99588	5.29915	7.64986	7.87767	7.29951
ENSMUST00000171794.8	ENSMUSG00000023079	Gtf2ird1	protein_coding	0.000608572	0.0158814	0.911853	0.26602	6.44063	0.288574	0.0936008	-0.0446869	0.0125489	0.0125489	3.63555	2.21989	3.08131	8.64908	7.14295	6.05506
ENSMUST00000048988.13	ENSMUSG00000039501	Znfx1	protein_coding	0.000608971	0.015883	0.53357	0.155669	6.3376	0.105272	0.0231924	0.00163663	0.0131569	0.0131569	1.49871	1.47539	1.66398	3.26797	2.46976	2.18183
ENSMUST00000013773.11	ENSMUSG00000013629	Cad	protein_coding	0.000609608	0.0158909	0.257828	0.0752275	9.21884	0.0267335	0.000126885	0.00836188	0.00757201	0.00836188	27.3931	33.6471	31.7939	42.8092	37.4326	38.3158
ENSMUST00000052539.12	ENSMUSG00000041263	Rusc1	protein_coding	0.000610947	0.015917	-0.487886	0.142377	5.71622	0.0830075	0.0131561	0.00134113	0.0172509	0.0172509	3.24365	3.01238	2.59573	1.99604	1.52563	1.86939
ENSMUST00000026548.13	ENSMUSG00000025475	Adgra1	protein_coding	0.000614546	0.0160019	-1.00565	0.293611	3.88876	0.318535	0.0367301	-0.0178113	0.0925809	0.0925809	0.387166	0.490135	0.450023	0.135764	0.155692	0.185161
ENSMUST00000021362.4	ENSMUSG00000020978	Klhdc2	protein_coding	0.000619146	0.0161128	0.256973	0.0750706	8.03839	0.0211357	0.000546094	0.00111036	0.00790731	0.00790731	47.5796	44.325	44.922	56.1836	57.971	60.2441
ENSMUST00000107215.8	ENSMUSG00000028484	Psip1	protein_coding	0.000622467	0.0161814	0.411623	0.1203	6.26096	0.0652124	0.00812121	0.00985657	0.013587	0.013587	6.89931	7.04701	9.35589	10.7951	12.0432	11.549
ENSMUST00000030404.4	ENSMUSG00000028651	Ppie	protein_coding	0.000622377	0.0161814	0.306968	0.0897128	7.46469	0.0379268	0.00072358	0.011349	0.00890839	0.011349	40.0862	32.6465	41.2025	52.5964	47.4491	52.3583
ENSMUST00000162053.7	ENSMUSG00000024640	Psat1	protein_coding	0.000624682	0.0162301	0.512151	0.149723	8.41571	0.10559	0.00305836	0.0305669	0.00756222	0.0305669	34.8171	51.1609	55.1954	70.1482	81.9789	76.8863
ENSMUST00000124778.7	ENSMUSG00000020736	Nt5c	retained_intron	0.000628624	0.0163235	-0.461373	0.134946	5.57082	0.0721532	0.00842587	0.00194131	0.0188896	0.0188896	12.9681	10.3788	11.432	7.16575	6.57164	7.82177
ENSMUST00000103199.8	ENSMUSG00000027404	Snrpb	protein_coding	0.000630053	0.0163516	0.244425	0.071504	9.20953	0.0228932	0.000103153	0.00610951	0.00756608	0.00756608	233.844	201.734	215.96	287.825	251.005	286.727
ENSMUST00000024959.9	ENSMUSG00000024146	Cript	protein_coding	0.000631613	0.0163831	-0.355777	0.1041	6.97755	0.0509773	0.00187206	0.014383	0.0101794	0.014383	45.4455	38.3001	42.1475	24.138	30.695	31.8225
ENSMUST00000179802.1	ENSMUSG00000096188	Cmtm4	protein_coding	0.000632331	0.0163927	0.264873	0.0775082	7.66777	0.0233229	0.000528487	0.002316	0.00848281	0.00848281	6.69688	7.06357	6.60442	9.43011	8.60219	8.1998
ENSMUST00000026735.8	ENSMUSG00000025645	Ccdc51	protein_coding	0.000635045	0.016445	0.385483	0.11284	5.83865	0.0559486	0.00291049	0.0113014	0.0161888	0.0161888	5.44929	5.31002	4.9562	8.60676	6.3419	8.03843
ENSMUST00000035266.10	ENSMUSG00000078853	Igtp	protein_coding	0.000634873	0.016445	2.3077	0.675504	4.54765	1.86577	0.643851	-0.308686	0.0406071	0.0406071	0.574103	0.189665	0.704335	4.27215	6.53292	2.81246
ENSMUST00000055104.5	ENSMUSG00000049536	Tceal1	protein_coding	0.000636017	0.0164612	-0.574296	0.168131	4.87837	0.116168	0.01158	0.00994887	0.0308219	0.0308219	2.4434	1.95073	2.27985	1.00764	1.29845	1.39357
ENSMUST00000099575.3	ENSMUSG00000074934	Grem1	protein_coding	0.000636409	0.0164623	-0.587956	0.172138	7.50748	0.139266	0.000771281	0.0436762	0.00881178	0.0436762	17.2958	19.3176	17.5339	6.99282	11.9898	11.4736
ENSMUST00000143971.1	ENSMUSG00000050608	Micos10	protein_coding	0.000637027	0.0164693	-0.363977	0.106571	7.28651	0.0533728	0.000954342	0.0160818	0.00933773	0.0160818	22.9652	16.544	19.2441	12.2419	13.727	14.0109
ENSMUST00000108707.2	ENSMUSG00000008348	Ubc	protein_coding	0.000639211	0.0165153	-0.294428	0.0862312	10.7994	0.0290088	2.45372e-05	0.00372846	0.0111292	0.0111292	2825.69	3081.99	2842.99	2262.2	1975.85	2116.03
ENSMUST00000201376.3	ENSMUSG00000029649	Pomp	protein_coding	0.000639505	0.0165153	-0.370661	0.108562	6.35059	0.0551741	0.00459597	0.0128507	0.0130825	0.0130825	99.2766	83.7396	103.253	52.1451	74.1557	71.7926
ENSMUST00000169622.7	ENSMUSG00000029028	Lrrc47	protein_coding	0.00064371	0.0166129	5.06249	1.48352	1.83873	8.13998	2.42324	-1.85907	0.877984	0.877984	9.03872e-10	1.56312e-09	7.06491e-06	0.805004	0.178524	1.40189
ENSMUST00000064547.12	ENSMUSG00000052605	Isoc2b	protein_coding	0.000643989	0.0166129	-0.586822	0.171969	4.69367	0.13182	0.00869944	0.0269406	0.0356604	0.0356604	4.67555	3.26315	4.09359	2.48786	2.37355	1.73694
ENSMUST00000114299.7	ENSMUSG00000031328	Flna	protein_coding	0.000644556	0.0166184	-0.317037	0.0929145	10.0192	0.0405135	0.00327897	0.00967068	0.0086595	0.00967068	87.5268	89.9584	66.4252	56.8449	56.0287	61.4587
ENSMUST00000015434.14	ENSMUSG00000015290	Ubl4a	nonsense_mediated_decay	0.000646471	0.0166587	0.475742	0.139459	5.84849	0.0912377	0.0125346	0.0166387	0.016113	0.0166387	10.1871	10.3867	14.7378	19.8112	16.6356	18.7217
ENSMUST00000225710.1	ENSMUSG00000025006	Sorbs1	protein_coding	0.00064698	0.0166627	-0.546713	0.160274	5.13101	0.0982011	0.012743	-0.00207736	0.0257887	0.0257887	18.5528	21.8627	21.2536	12.7902	10.6101	11.2923
ENSMUST00000107249.7	ENSMUSG00000063316	Rpl27	protein_coding	0.000648779	0.0167	0.368684	0.108107	8.13331	0.054803	0.000700198	0.0168306	0.00779857	0.0168306	171.827	129.699	117.324	201.213	180.006	202.673
ENSMUST00000032422.5	ENSMUSG00000030284	Creld1	protein_coding	0.000651349	0.0167479	-0.296816	0.0870612	6.92348	0.0312981	0.00101801	0.00506726	0.0103515	0.0103515	12.9994	13.1752	13.5824	10.8366	8.99184	9.53801
ENSMUST00000105413.7	ENSMUSG00000020241	Col6a2	protein_coding	0.000651319	0.0167479	0.97663	0.286461	6.20098	0.384614	0.00813454	0.114956	0.0139183	0.114956	1.2441	1.47497	2.3154	6.01618	4.41482	2.93667
ENSMUST00000042497.13	ENSMUSG00000037916	Ndufv1	protein_coding	0.000652746	0.0167747	0.243948	0.0715663	8.59237	0.0230319	0.0002041	0.00626935	0.0074785	0.0074785	81.1343	74.4017	84.042	103.716	92.7369	106.566
ENSMUST00000002655.7	ENSMUSG00000002580	Mien1	protein_coding	0.000653163	0.0167762	-0.28867	0.0846908	7.13231	0.0336062	0.00100001	0.00975878	0.00973401	0.00975878	69.7094	56.714	63.9244	45.5701	43.2895	51.9545
ENSMUST00000050770.5	ENSMUSG00000049130	C5ar1	protein_coding	0.000653853	0.0167848	0.875648	0.256921	5.03749	0.309238	0.0217968	0.0772162	0.0274998	0.0772162	0.842987	1.22542	1.57	3.47696	3.20485	1.96346
ENSMUST00000136390.7	ENSMUSG00000022568	Scrib	processed_transcript	0.000654654	0.0167963	0.512775	0.150467	5.85366	0.0876142	0.0178867	-0.00697084	0.0160737	0.0160737	2.4291	2.06122	1.97745	3.98107	3.59201	3.15024
ENSMUST00000051934.6	ENSMUSG00000044715	Gskip	protein_coding	0.000656456	0.0168241	-0.310133	0.0910244	6.74605	0.0356141	0.00142911	0.00701991	0.010999	0.010999	12.2677	10.5672	10.1192	7.24172	8.56562	7.97129
ENSMUST00000049484.12	ENSMUSG00000036197	Gxylt1	protein_coding	0.000656807	0.0168241	-0.529037	0.155279	6.50568	0.112898	0.00373084	0.0324367	0.01216	0.0324367	3.29853	5.03297	3.71958	1.8731	2.63615	2.4578
ENSMUST00000071006.8	ENSMUSG00000024217	Snrpc	protein_coding	0.000656666	0.0168241	0.245298	0.0719969	8.39651	0.0238466	0.000201072	0.00704301	0.00757425	0.00757425	179.89	150.579	171.765	215.35	197.587	221.843
ENSMUST00000091628.10	ENSMUSG00000046876	Atxn1	protein_coding	0.000660895	0.0169196	-0.391018	0.114826	6.4786	0.0616906	0.0029017	0.0168758	0.0123176	0.0168758	1.94171	2.57609	1.89238	1.43941	1.58954	1.23874
ENSMUST00000080138.12	ENSMUSG00000033701	Acbd6	protein_coding	0.000663101	0.0169669	0.395872	0.116283	7.11796	0.0632405	0.00128126	0.0190012	0.00977287	0.0190012	33.7517	33.9192	22.8731	45.5844	40.6657	44.9146
ENSMUST00000002152.12	ENSMUSG00000002083	Bbc3	protein_coding	0.000663887	0.0169778	0.493908	0.145093	6.3135	0.0984459	0.00348336	0.0280947	0.0132936	0.0280947	7.0854	6.25771	4.50683	11.2174	9.45808	8.20431
ENSMUST00000143349.7	ENSMUSG00000027184	Caprin1	protein_coding	0.000665249	0.016995	-0.385472	0.113257	6.06376	0.0561201	0.00454912	0.0098801	0.0146917	0.0146917	9.5256	11.8781	8.92598	5.95617	7.04719	7.17787
ENSMUST00000151289.8	ENSMUSG00000040451	Sgms1	protein_coding	0.000665278	0.016995	-0.646704	0.190011	5.83235	0.15383	0.0379185	-0.00246574	0.016238	0.016238	4.00727	5.12387	4.84127	1.85593	2.99395	2.46672
ENSMUST00000034428.7	ENSMUSG00000031950	Gabarapl2	protein_coding	0.000666408	0.0170146	-0.281058	0.0825903	7.49628	0.0318835	0.00108316	0.00914858	0.00883669	0.00914858	45.4676	38.3683	39.0451	27.7573	29.826	33.8183
ENSMUST00000075888.5	ENSMUSG00000061524	Zic2	protein_coding	0.000668652	0.0170627	-0.768453	0.225875	4.18761	0.189219	0.0163608	-0.00128251	0.0601684	0.0601684	1.30876	0.946414	1.022	0.503681	0.517882	0.459429
ENSMUST00000125304.7	ENSMUSG00000001143	Lman2l	protein_coding	0.0006696	0.0170685	0.464082	0.136425	5.77617	0.0853655	0.0112165	0.0147259	0.0167012	0.0167012	2.02365	1.74043	2.61994	3.45028	3.14395	3.30472
ENSMUST00000032272.12	ENSMUSG00000030168	Adipor2	protein_coding	0.000669461	0.0170685	0.287999	0.0846612	7.59732	0.0261851	0.00213016	-0.000502718	0.0086211	0.0086211	11.5024	11.1308	11.9621	15.6098	15.077	15.0014
ENSMUST00000026227.2	ENSMUSG00000025209	Twnk	protein_coding	0.000670933	0.0170932	0.374015	0.109966	6.13875	0.0485963	0.00387521	0.00441239	0.0142636	0.0142636	2.71304	3.04742	3.14796	4.72958	3.94723	4.12883
ENSMUST00000022856.14	ENSMUSG00000022248	Rad1	protein_coding	0.000678377	0.0172736	0.428697	0.126155	5.6698	0.0572881	0.00615033	-0.00345816	0.0177224	0.0177224	5.15672	4.86803	5.07877	8.06691	7.60028	7.12151
ENSMUST00000153941.7	ENSMUSG00000044712	Slc38a6	protein_coding	0.000679877	0.0173024	-0.323716	0.0952787	6.95405	0.0423312	0.00173823	0.0118788	0.010253	0.0118788	10.3623	9.64622	8.90439	6.4291	6.23675	8.0999
ENSMUST00000052140.2	ENSMUSG00000050107	Haspin	protein_coding	0.000680487	0.0173086	0.729049	0.214595	5.60079	0.214715	0.00395114	0.0651256	0.0185104	0.0651256	1.2838	2.50223	2.19729	4.40946	3.74608	3.69814
ENSMUST00000019362.14	ENSMUSG00000020888	Dvl2	protein_coding	0.000681429	0.0173232	0.275162	0.0810028	7.4053	0.0251681	0.000793418	0.0022739	0.00904877	0.00904877	12.8571	12.2247	12.3419	17.2228	15.0895	16.5536
ENSMUST00000150819.2	ENSMUSG00000034382	AI661453	protein_coding	0.000682093	0.0173308	-0.499993	0.147201	5.17711	0.0991165	0.00750945	0.0226386	0.0249926	0.0249926	1.19421	1.01327	1.18422	0.865303	0.638826	0.562104
ENSMUST00000029266.13	ENSMUSG00000027712	Anxa5	protein_coding	0.000683138	0.017348	-0.274443	0.0808074	10.4304	0.0248545	4.68154e-05	0.00277682	0.00974793	0.00974793	702.25	651.204	687.804	498.372	492.109	540.439
ENSMUST00000020705.4	ENSMUSG00000020430	Pes1	protein_coding	0.000683601	0.0173505	0.242833	0.0715039	8.83287	0.01984	0.000227116	0.00246005	0.0074421	0.0074421	58.9945	57.0864	61.3291	75.6238	70.4214	76.6817
ENSMUST00000013842.11	ENSMUSG00000013698	Pea15a	protein_coding	0.00068516	0.0173714	-0.246594	0.072625	9.49388	0.021004	9.88053e-05	0.0033529	0.00781278	0.00781278	174.348	155.941	169.856	134.278	123.936	128.878
ENSMUST00000233004.1	ENSMUSG00000034868	Myl12b	protein_coding	0.000685057	0.0173714	-0.535357	0.157667	6.69474	0.115813	0.0152809	0.0220075	0.0112154	0.0220075	29.5088	36.0941	39.8745	25.2395	16.6604	19.7066
ENSMUST00000061656.7	ENSMUSG00000050310	Rictor	protein_coding	0.000688084	0.0174361	-0.563798	0.166102	6.59151	0.128468	0.00225363	0.0391312	0.0116995	0.0391312	2.70735	4.11951	2.98256	1.43795	2.16918	1.87162
ENSMUST00000029566.8	ENSMUSG00000027954	Efna1	protein_coding	0.000690757	0.0174945	1.16181	0.342391	4.27781	0.460817	0.121917	-0.0520691	0.0539304	0.0539304	0.882339	0.695281	0.762762	3.43084	2.5975	1.68931
ENSMUST00000041053.10	ENSMUSG00000036880	Acaa2	protein_coding	0.000692061	0.0175181	0.263939	0.0777959	7.68263	0.0237274	0.000623443	0.00291192	0.00845487	0.00845487	39.7249	36.5215	37.8894	51.8941	45.5976	49.1332
ENSMUST00000174372.2	ENSMUSG00000028645	Slc2a1	nonsense_mediated_decay	0.000693203	0.0175376	0.337858	0.099597	7.05444	0.0406266	0.00492895	0.00304868	0.0099504	0.0099504	11.562	12.26	12.0439	18.935	15.1508	15.7332
ENSMUST00000052946.11	ENSMUSG00000031965	Tbx20	protein_coding	0.000693603	0.0175383	-1.2145	0.358039	3.59176	0.587134	0.0446078	0.13618	0.14768	0.14768	0.296359	0.222392	0.181077	0.0412814	0.123394	0.0551593
ENSMUST00000030538.4	ENSMUSG00000028757	Ddost	protein_coding	0.000694246	0.0175452	0.242335	0.0714465	9.02052	0.0212508	0.000181019	0.00436007	0.00747588	0.00747588	96.2341	99.0273	95.6382	133.796	123.663	110.677
ENSMUST00000165443.3	ENSMUSG00000016619	Nup50	protein_coding	0.000695456	0.0175664	0.271185	0.0799635	7.5714	0.025294	0.000916797	0.00312262	0.00867444	0.00867444	10.8405	10.6277	9.11116	13.4557	13.2003	12.8069
ENSMUST00000023226.12	ENSMUSG00000022565	Plec	protein_coding	0.000698805	0.0176388	-0.389284	0.114831	8.90714	0.0612861	0.010828	0.00895135	0.00744891	0.00895135	11.6071	17.0985	14.8071	9.77063	9.19303	9.8307
ENSMUST00000018186.15	ENSMUSG00000018042	Cyb5r3	protein_coding	0.000699069	0.0176388	-0.259915	0.0766723	8.44932	0.0261212	0.00127541	0.00604276	0.00754255	0.00754255	53.5846	56.485	60.968	44.5076	46.809	39.7973
ENSMUST00000188641.6	ENSMUSG00000079658	Eloc	protein_coding	0.000702439	0.0176967	-0.669471	0.197564	6.38903	0.181295	0.00261607	0.0559313	0.0128589	0.0559313	14.8865	16.2879	15.2171	5.19263	9.61341	9.24873
ENSMUST00000030365.5	ENSMUSG00000028622	Mrpl37	protein_coding	0.000702541	0.0176967	0.250205	0.0738375	8.05443	0.0216815	0.000290096	0.00333588	0.00788786	0.00788786	55.2575	51.026	54.001	69.5007	63.1397	71.3054
ENSMUST00000016124.14	ENSMUSG00000015980	Lrrc27	protein_coding	0.000702748	0.0176967	-0.522207	0.154111	5.09318	0.0873011	0.00916154	-0.0022976	0.0264639	0.0264639	3.02629	2.63479	3.07533	1.69682	1.5986	1.80365
ENSMUST00000023454.11	ENSMUSG00000022770	Dlg1	protein_coding	0.000702861	0.0176967	-0.659803	0.194721	6.0672	0.176101	0.031555	0.0253192	0.0146715	0.0253192	4.42617	5.02914	5.61248	1.76613	3.12978	2.99486
ENSMUST00000047186.9	ENSMUSG00000041895	Wipi1	protein_coding	0.000704214	0.0177071	-0.311185	0.0918509	6.75973	0.0314236	0.00171105	0.00125505	0.0109438	0.0109438	8.78651	8.47609	8.44776	5.80606	6.75987	6.03771
ENSMUST00000115342.9	ENSMUSG00000001131	Timp1	protein_coding	0.000703734	0.0177071	0.28531	0.084209	8.90547	0.03293	0.000516294	0.0101204	0.00744867	0.0101204	217.356	233.569	271.143	322.177	300.947	317.199
ENSMUST00000114551.9	ENSMUSG00000031347	Cetn2	protein_coding	0.000704399	0.0177071	-0.537515	0.158659	5.55276	0.100653	0.0186292	-0.00115851	0.01913	0.01913	8.06363	10.5245	10.3277	4.77119	5.65018	6.0911
ENSMUST00000019859.8	ENSMUSG00000019715	Gle1	protein_coding	0.000707663	0.0177797	0.265269	0.0783291	7.59765	0.0254923	0.000582744	0.0048948	0.00862043	0.00862043	11.662	11.8358	13.1917	16.909	15.2735	14.9817
ENSMUST00000071130.4	ENSMUSG00000060063	Alox5ap	protein_coding	0.000714454	0.0179407	0.81654	0.241296	4.31773	0.228452	0.0358266	-0.000287903	0.0515092	0.0515092	1.02909	1.04447	1.35301	2.81711	2.91856	2.02422
ENSMUST00000049040.13	ENSMUSG00000037905	Bri3bp	protein_coding	0.000715237	0.0179508	0.262408	0.0775513	7.65478	0.0224626	0.000513724	0.00174274	0.00850759	0.00850759	8.32009	8.37232	8.02518	11.1684	9.9112	10.6495
ENSMUST00000039803.6	ENSMUSG00000041765	Ubac2	protein_coding	0.000715852	0.0179568	0.269591	0.0796797	7.46529	0.0271898	0.000616255	0.00611626	0.00890702	0.00890702	22.1117	18.8026	21.1993	26.372	25.2079	28.5767
ENSMUST00000029603.9	ENSMUSG00000027978	Prss12	protein_coding	0.000716777	0.0179609	-0.655657	0.193805	4.4868	0.153097	0.0132778	0.0168857	0.0430626	0.0430626	1.38818	1.41645	1.02238	0.731108	0.708972	0.517836
ENSMUST00000078084.6	ENSMUSG00000037266	Rsrp1	protein_coding	0.000716443	0.0179609	0.817397	0.241604	5.55513	0.270489	0.0112841	0.0762748	0.0190979	0.0762748	4.28084	3.16318	1.93815	6.97141	7.42069	5.68904
[truncated: 45,349 more rows]

## Sheet: DE mRNA Pelo (transcript level)
transcript_id	ens_gene	ext_gene	transcript_biotype	pval	qval	b	se_b	mean_obs	var_obs	tech_var	sigma_sq	smooth_sigma_sq	final_sigma_sq	Cre_control_fibro_1_RNA	Cre_control_fibro_2_RNA	Cre_control_fibro_3_RNA	Pelo_fibro_1_RNA	Pelo_fibro_2_RNA
[truncated: 40,035 more rows]

[truncated: 4 more sheets: DE mRNA Upf2 (transcript level), DE mRNA Hbs1l (gene level), DE mRNA Pelo (gene level), DE mRNA Upf2 (gene level)]
